# Supplementary material
Source: publisher site journal article supplement (https://www.dovepress.com/article/364708)
Supplement: Supplementary file 1 [file get_supplementary_file.php]

## **The overexpression of fibronectin 1 promotes cancer progression and associated with M2 macrophages polarization in head and neck squamous cell carcinoma patients**

Wanhang Zhou<sup>1</sup>, Weidong Du<sup>1</sup>, Yanfei Li<sup>2</sup>, Maged Ali Al-Aroomi<sup>1</sup>, Cong Yan<sup>1</sup>, Yao Wang<sup>1</sup>, Zeying Zhang<sup>1</sup>, Fayu Liu<sup>1\*</sup>, Changfu Sun<sup>1\*</sup>

1. Department of Oral Maxillofacial-Head and Neck Surgery, School of Stomatology, China Medical University; Oral Diseases Laboratory of Liaoning, Shenyang 110000, China
2. Department of Prosthodontics, Guanghua School of Stomatology, Hospital of Stomatology, Sun Yat-sen University; Guangdong Provincial Key Laboratory of Stomatology, Guangzhou 510055, China

### **\*Corresponding authors:**

Fayu Liu

Department of Oral Maxillofacial-Head and Neck Surgery, School of Stomatology, China Medical University; Oral Diseases Laboratory of Liaoning

117 Nanjing North Road, Heping District, Shenyang, Liaoning 110000, China

Tel: +86 24 22894773

Fax: +86 24 86602310

E-mail: lfyhjk@126.com

Changfu Sun

Department of Oral Maxillofacial-Head and Neck Surgery, School of Stomatology, China Medical University; Oral Diseases Laboratory of Liaoning

117 Nanjing North Road, Heping District, Shenyang, Liaoning 110000, China

Tel: +86 24 22894773

Fax: +86 24 86602310

E-mail: changfusun@hotmail.com

## Table of contents

|                                                                      |   |
|----------------------------------------------------------------------|---|
| 1. The full names of tumor abbreviation from TCGA (Table S1).....    | 3 |
| 2. siRNA sequences (Table S2).....                                   | 5 |
| 3. FN1 expression in HNSCC from Oncomine (Figure S1).....            | 6 |
| 4. Bar plot of GO&KEGG analysis (Figure S2).....                     | 7 |
| 5. The details of GSEA on FN1 in patients with HNSCC (Table S3)..... | 8 |
| 6. The full list of FN1 co-expressed gene in HNSCC (Table S4).....   | 9 |

**1. Table S1.** The full names of tumor abbreviation from TCGA.

| <b>Abbreviations</b> | <b>Tumor full names</b>                                          |
|----------------------|------------------------------------------------------------------|
| ACC                  | Adrenocortical carcinoma                                         |
| BLCA                 | Bladder Urothelial Carcinoma                                     |
| BRCA                 | Breast invasive carcinoma                                        |
| CESC                 | Cervical squamous cell carcinoma and endocervical adenocarcinoma |
| CHOL                 | Cholangiocarcinoma                                               |
| COAD                 | Colon adenocarcinoma                                             |
| DLBC                 | Lymphoid Neoplasm Diffuse Large B-cell Lymphoma                  |
| ESCA                 | Esophageal carcinoma                                             |
| GBM                  | Glioblastoma multiforme                                          |
| HNSC                 | Head and Neck squamous cell carcinoma                            |
| KICH                 | Kidney Chromophobe                                               |
| KIRC                 | Kidney renal clear cell carcinoma                                |
| KIRP                 | Kidney renal papillary cell carcinoma                            |
| LAML                 | Acute Myeloid Leukemia                                           |
| LGG                  | Lower Grade Glioma                                               |
| LIHC                 | Liver hepatocellular carcinoma                                   |
| LUAD                 | Lung adenocarcinoma                                              |
| LUSC                 | Lung squamous cell carcinoma                                     |
| MESO                 | Mesothelioma                                                     |
| OV                   | Ovarian serous cystadenocarcinoma                                |
| PAAD                 | Ovarian serous cystadenocarcinoma                                |
| PCPG                 | Pheochromocytoma and Paranglioma                                 |
| PRAD                 | Prostate adenocarcinoma                                          |
| READ                 | Rectum adenocarcinoma                                            |
| SARC                 | Sarcoma                                                          |
| SKCM                 | Skin Cutaneous Melanoma                                          |
| STAD                 | Stomach adenocarcinoma                                           |
| TGCT                 | Testicular Germ Cell Tumor                                       |
| THCA                 | Thyroid carcinoma                                                |

|      |                                      |
|------|--------------------------------------|
| THYM | Thymoma                              |
| UCEC | Uterine Corpus Endometrial Carcinoma |
| UCS  | Uterine Carcinosarcoma               |
| UVM  | Uveal Melanoma                       |

---

**2. Table S2.** siRNA sequences.

---

| siRNA    | Sequences           |
|----------|---------------------|
| si-FN1#1 | GGAAAACACTATCAGATAA |
| si-FN1#2 | CTGCGAGAGTAAACCTGAA |
| si-FN1#3 | GCCAACCTTTACAGACCTA |

---

### 3. Figure S1. FN1 expression in HNSCC from Oncomine.

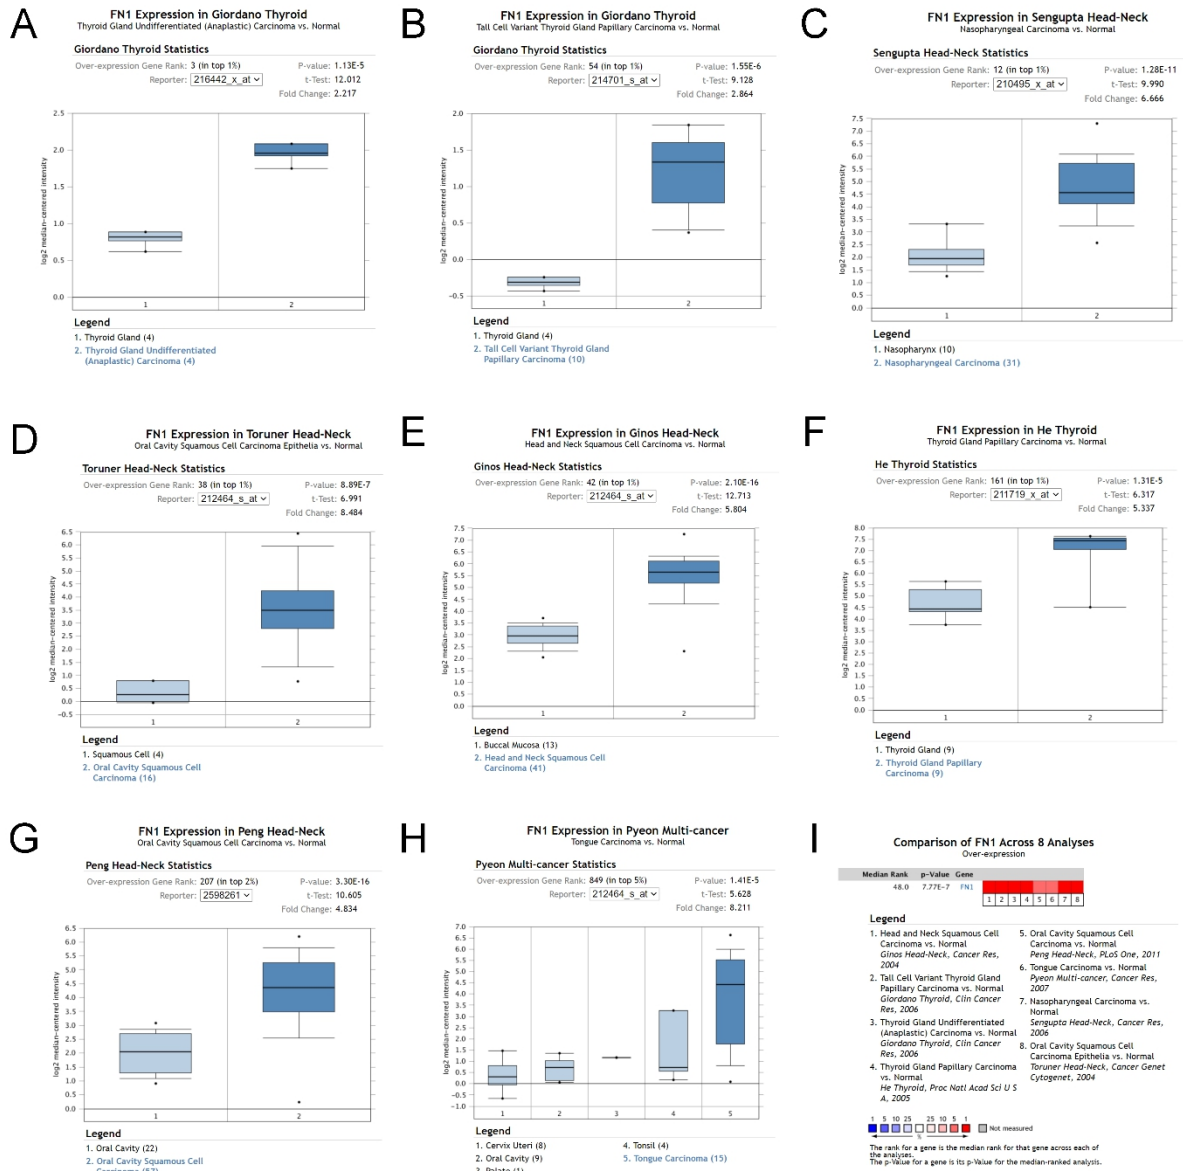

**Figure S1.** FN1 expression in HNSCC from Oncomine. (A–H) FN1 expression in HNSC tissue and normal tissues in eight analyses from Oncomine. (I) Meta-analysis of seven datasets from eight studies in Oncomine comparing the FN1 expression levels in HNSC tissue with those of the corresponding normal tissues.

#### 4. Figure S2. Bar plots of GO&KEGG analysis.

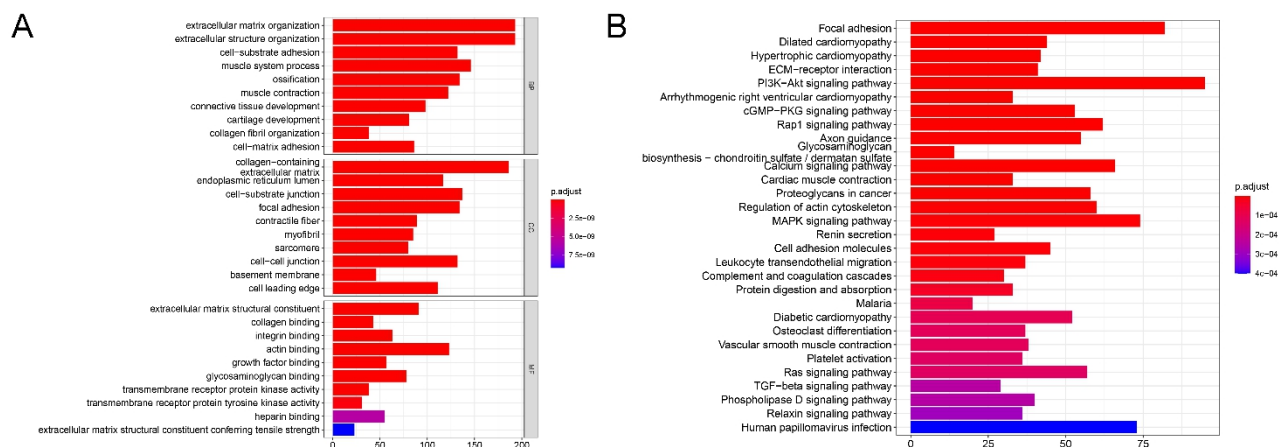

**Figure S2.** Bar plots of GO&KEGG analysis. (A) GO enrichment bar plot of FN1 and related genes. BP: biological process; CC: cellular component; MF: molecular function. (B) KEGG pathway bar plot of FN1 and related genes.

**5. Table S3.** The details of GSEA on FN1 in patients with HNSCC.

| Gene sets                                                             | Size | NES   | NOM<br><i>P</i> -value | FDR q-<br>value |
|-----------------------------------------------------------------------|------|-------|------------------------|-----------------|
| NABA_CORE_MATRISOME                                                   | 273  | 3.76  | 0.003                  | 0.0084          |
| REACTOME_EXTRACELLULAR_MATRIX_ORGANIZATION                            | 299  | 3.69  | 0.003                  | 0.0084          |
| NABA_ECM_GLYCOPROTEINS                                                | 194  | 3.52  | 0.003                  | 0.0082          |
| REACTOME_COLLAGEN_FORMATION                                           | 90   | 3.44  | 0.003                  | 0.0082          |
| KEGG_FOCAL_ADHESION                                                   | 198  | 3.44  | 0.003                  | 0.0082          |
| KEGG_ECM_RECEPTOR_INTERACTION                                         | 82   | 3.38  | 0.003                  | 0.0082          |
| REACTOME_ECM_PROTEOGLYCANS                                            | 75   | 3.37  | 0.003                  | 0.0082          |
| REACTOME_DEGRADATION_OF_THE_EXTRACELLULAR_MATRIX                      | 139  | 3.35  | 0.003                  | 0.0082          |
| REACTOME_ASSEMBLY_OF_COLLAGEN_FIBRILS_AND_OTHER_MULTIMERIC_STRUCTURES | 61   | 3.29  | 0.003                  | 0.0082          |
| REACTOME_COLLAGEN_BIOSYNTHESIS_AND_MODIFYING_ENZYMES                  | 67   | 3.28  | 0.003                  | 0.0082          |
| REACTOME_COLLAGEN_DEGRADATION                                         | 64   | 3.25  | 0.003                  | 0.0082          |
| WP_FOCAL_ADHESION                                                     | 197  | 3.21  | 0.003                  | 0.0082          |
| PID_AVB3_INTEGRIN_PATHWAY                                             | 73   | 3.18  | 0.003                  | 0.0082          |
| PID_INTEGRIN1_PATHWAY                                                 | 65   | 3.18  | 0.003                  | 0.0082          |
| REACTOME_INTEGRIN_CELL_SURFACE_INTERACTIONS                           | 83   | 3.14  | 0.003                  | 0.0082          |
| REACTOME_NON_INTEGRIN_MEMBRANE_ECM_INTERACTIONS                       | 58   | 3.13  | 0.003                  | 0.0082          |
| KEGG_HYPERTROPHIC_CARDIOMYOPATHY_HCM                                  | 83   | 3.13  | 0.003                  | 0.0082          |
| REACTOME_FORMATION_OF_THE_CORNIFIED_ENVELOPE                          | 128  | -3.12 | 0.002                  | 0.0082          |
| REACTOME_MUSCLE_CONTRACTION                                           | 205  | 3.12  | 0.003                  | 0.0084          |
| KEGG_DILATED_CARDIOMYOPATHY                                           | 90   | 3.06  | 0.003                  | 0.0082          |
| REACTOME_O_GLYCOSYLATION_OF_TSR_DOMAIN_CONTAINING_PROTEINS            | 38   | 3.03  | 0.002                  | 0.0082          |
| NABA_COLLAGENS                                                        | 44   | 3.02  | 0.003                  | 0.0082          |
| REACTOME_COLLAGEN_CHAIN_TRIMERIZATION                                 | 44   | 3.02  | 0.003                  | 0.0082          |
| REACTOME_ELASTIC_FIBRE_FORMATION                                      | 44   | 3.02  | 0.003                  | 0.0082          |
| WP_ENDOCHONDRAL_OSSIFICATION                                          | 64   | 3.01  | 0.003                  | 0.0082          |
| WP_ENDOCHONDRAL_OSSIFICATION_WITH_SKELETAL_DYSPLASIAS                 | 64   | 3.01  | 0.003                  | 0.0082          |



**6. Table S4.** The full list of FN1 co-expressed gene in HNSCC

| Query    | Pearson correlation | P-value   | FDR (BH)  | Event_SD | Event_TD |
|----------|---------------------|-----------|-----------|----------|----------|
| FN1      | 1                   | 1.00E-148 | 1.00E-144 | 520      | 520      |
| POSTN    | 0.853273503         | 1.37E-148 | 1.38E-144 | 520      | 520      |
| COL1A1   | 0.849841442         | 3.38E-146 | 2.27E-142 | 520      | 520      |
| NID2     | 0.846815067         | 3.90E-144 | 1.97E-140 | 520      | 520      |
| COL5A1   | 0.842351829         | 3.56E-141 | 1.44E-137 | 520      | 520      |
| COL1A2   | 0.840082823         | 1.05E-139 | 3.53E-136 | 520      | 520      |
| COL3A1   | 0.838603974         | 9.28E-139 | 2.67E-135 | 520      | 520      |
| ADAM12   | 0.830621934         | 8.16E-134 | 1.86E-130 | 520      | 520      |
| COL6A3   | 0.830608936         | 8.31E-134 | 1.86E-130 | 520      | 520      |
| COL5A2   | 0.829588132         | 3.41E-133 | 6.88E-130 | 520      | 520      |
| VCAN     | 0.824256865         | 4.71E-130 | 8.63E-127 | 520      | 520      |
| DACT1    | 0.819787834         | 1.67E-127 | 2.81E-124 | 520      | 520      |
| SPARC    | 0.819268286         | 3.28E-127 | 5.09E-124 | 520      | 520      |
| FSTL1    | 0.815869137         | 2.53E-125 | 3.64E-122 | 520      | 520      |
| LAMA4    | 0.81328507          | 6.49E-124 | 8.72E-121 | 520      | 520      |
| ZNF469   | 0.811170062         | 8.89E-123 | 1.12E-119 | 520      | 520      |
| FAP      | 0.810599385         | 1.79E-122 | 2.12E-119 | 520      | 520      |
| CALD1    | 0.809542145         | 6.52E-122 | 7.30E-119 | 520      | 520      |
| GLT8D2   | 0.807535266         | 7.40E-121 | 7.86E-118 | 520      | 520      |
| OLFML2B  | 0.804999086         | 1.53E-119 | 1.54E-116 | 520      | 520      |
| COL6A1   | 0.804338922         | 3.35E-119 | 3.21E-116 | 520      | 520      |
| PDGFRB   | 0.802893166         | 1.83E-118 | 1.68E-115 | 520      | 520      |
| FAM198B  | 0.800182543         | 4.29E-117 | 3.76E-114 | 520      | 520      |
| TIMP2    | 0.797909787         | 5.80E-116 | 4.87E-113 | 520      | 520      |
| MSRB3    | 0.797498713         | 9.25E-116 | 7.46E-113 | 520      | 520      |
| COL6A2   | 0.78897937          | 1.18E-111 | 9.04E-109 | 520      | 520      |
| TNFAIP6  | 0.788955564         | 1.21E-111 | 9.04E-109 | 520      | 520      |
| ADAMTS12 | 0.787721909         | 4.59E-111 | 3.31E-108 | 520      | 520      |
| GPR124   | 0.787367424         | 6.72E-111 | 4.67E-108 | 520      | 520      |
| AEBP1    | 0.786906017         | 1.10E-110 | 7.41E-108 | 520      | 520      |
| LOXL2    | 0.785467247         | 5.12E-110 | 3.33E-107 | 520      | 520      |
| ADAMTS2  | 0.784811246         | 1.03E-109 | 6.48E-107 | 520      | 519      |
| KCNE4    | 0.781357811         | 3.86E-108 | 2.36E-105 | 520      | 520      |
| FBN1     | 0.78067529          | 7.85E-108 | 4.65E-105 | 520      | 520      |
| EMILIN1  | 0.780191078         | 1.30E-107 | 7.46E-105 | 520      | 520      |
| SULF1    | 0.778331147         | 8.78E-107 | 4.92E-104 | 520      | 520      |
| TAGLN    | 0.773714506         | 9.38E-105 | 5.11E-102 | 520      | 520      |
| PCOLCE   | 0.772961209         | 1.99E-104 | 1.06E-101 | 520      | 520      |
| COL8A1   | 0.770741752         | 1.79E-103 | 9.27E-101 | 520      | 520      |
| ITGA11   | 0.76539538          | 3.23E-101 | 1.63E-98  | 520      | 520      |
| CDH11    | 0.765181192         | 3.97E-101 | 1.95E-98  | 520      | 520      |

|          |             |           |          |     |     |
|----------|-------------|-----------|----------|-----|-----|
| LRRC32   | 0.7635321   | 1.91E-100 | 9.18E-98 | 520 | 520 |
| MXRA5    | 0.762750365 | 4.01E-100 | 1.88E-97 | 520 | 520 |
| COL10A1  | 0.759420925 | 9.12E-99  | 4.18E-96 | 520 | 520 |
| ITGA1    | 0.758743756 | 1.71E-98  | 7.67E-96 | 520 | 520 |
| CTHRC1   | 0.756902542 | 9.37E-98  | 4.11E-95 | 520 | 520 |
| GPC6     | 0.755982197 | 2.18E-97  | 9.35E-95 | 520 | 520 |
| MMP2     | 0.755716676 | 2.78E-97  | 1.17E-94 | 520 | 520 |
| HEYL     | 0.752002213 | 8.04E-96  | 3.31E-93 | 520 | 520 |
| NTM      | 0.75161873  | 1.13E-95  | 4.57E-93 | 520 | 520 |
| VIM      | 0.746926753 | 7.25E-94  | 2.87E-91 | 520 | 520 |
| KIAA1462 | 0.746023932 | 1.60E-93  | 6.20E-91 | 520 | 520 |
| MMP14    | 0.745540074 | 2.44E-93  | 9.27E-91 | 520 | 520 |
| CDH2     | 0.744993128 | 3.92E-93  | 1.46E-90 | 520 | 513 |
| MMP16    | 0.744318882 | 7.03E-93  | 2.58E-90 | 520 | 518 |
| MICAL2   | 0.742261194 | 4.14E-92  | 1.49E-89 | 520 | 520 |
| OLFML3   | 0.739826299 | 3.30E-91  | 1.17E-88 | 520 | 520 |
| STARD13  | 0.738785312 | 7.97E-91  | 2.77E-88 | 520 | 520 |
| P4HA3    | 0.73728768  | 2.81E-90  | 9.60E-88 | 520 | 520 |
| SDC2     | 0.737009182 | 3.55E-90  | 1.19E-87 | 520 | 520 |
| ST3GAL2  | 0.736942738 | 3.75E-90  | 1.24E-87 | 520 | 520 |
| NOX4     | 0.734320769 | 3.32E-89  | 1.08E-86 | 520 | 520 |
| DAB2     | 0.733265583 | 7.93E-89  | 2.54E-86 | 520 | 520 |
| FERMT2   | 0.731433338 | 3.56E-88  | 1.12E-85 | 520 | 520 |
| COL11A1  | 0.730622962 | 6.89E-88  | 2.14E-85 | 520 | 518 |
| COL5A3   | 0.730028221 | 1.12E-87  | 3.41E-85 | 520 | 520 |
| ITGB3    | 0.729561607 | 1.63E-87  | 4.90E-85 | 520 | 518 |
| SFRP2    | 0.728074947 | 5.40E-87  | 1.60E-84 | 520 | 520 |
| THY1     | 0.727982207 | 5.82E-87  | 1.70E-84 | 520 | 520 |
| COL4A1   | 0.727330742 | 9.82E-87  | 2.83E-84 | 520 | 520 |
| SCARF2   | 0.726045299 | 2.74E-86  | 7.79E-84 | 520 | 520 |
| BMP8A    | 0.724591888 | 8.70E-86  | 2.44E-83 | 520 | 520 |
| FIBIN    | 0.72211355  | 6.12E-85  | 1.69E-82 | 520 | 519 |
| ADAMTS6  | 0.721597725 | 9.16E-85  | 2.50E-82 | 520 | 518 |
| ACTA2    | 0.721563951 | 9.41E-85  | 2.53E-82 | 520 | 520 |
| ADAMTS5  | 0.7212606   | 1.19E-84  | 3.16E-82 | 520 | 520 |
| PMP22    | 0.720984461 | 1.48E-84  | 3.87E-82 | 520 | 520 |
| BICC1    | 0.720914888 | 1.56E-84  | 4.04E-82 | 520 | 513 |
| HEPH     | 0.719036362 | 6.70E-84  | 1.71E-81 | 520 | 520 |
| RASGRF2  | 0.717812274 | 1.72E-83  | 4.34E-81 | 520 | 520 |
| MYL9     | 0.717334852 | 2.48E-83  | 6.18E-81 | 520 | 520 |
| THBS2    | 0.714861846 | 1.64E-82  | 4.03E-80 | 520 | 520 |
| PXDN     | 0.714596129 | 2.00E-82  | 4.87E-80 | 520 | 520 |
| BGN      | 0.713506399 | 4.57E-82  | 1.10E-79 | 520 | 520 |
| CALU     | 0.712479991 | 9.89E-82  | 2.35E-79 | 520 | 520 |
| PHLDB1   | 0.712158861 | 1.26E-81  | 2.95E-79 | 520 | 520 |
| CTSK     | 0.711965078 | 1.45E-81  | 3.37E-79 | 520 | 520 |

|          |             |          |          |     |     |
|----------|-------------|----------|----------|-----|-----|
| GLIS3    | 0.71017571  | 5.53E-81 | 1.27E-78 | 520 | 519 |
| ZEB2     | 0.709895644 | 6.81E-81 | 1.54E-78 | 520 | 520 |
| ZEB1     | 0.709367606 | 1.01E-80 | 2.26E-78 | 520 | 520 |
| COL24A1  | 0.709263489 | 1.09E-80 | 2.41E-78 | 520 | 518 |
| AXL      | 0.707829271 | 3.14E-80 | 6.88E-78 | 520 | 520 |
| SGCD     | 0.707639441 | 3.61E-80 | 7.83E-78 | 520 | 520 |
| MXRA8    | 0.707151312 | 5.17E-80 | 1.11E-77 | 520 | 520 |
| OLFML1   | 0.706363123 | 9.21E-80 | 1.95E-77 | 520 | 520 |
| COLEC12  | 0.706311111 | 9.56E-80 | 2.01E-77 | 520 | 520 |
| EFEMP2   | 0.705856878 | 1.33E-79 | 2.77E-77 | 520 | 520 |
| PPAPDC1A | 0.704241273 | 4.32E-79 | 8.89E-77 | 520 | 516 |
| DLC1     | 0.702559486 | 1.46E-78 | 2.97E-76 | 520 | 520 |
| BNC2     | 0.702387996 | 1.65E-78 | 3.32E-76 | 520 | 520 |
| AKAP12   | 0.702346463 | 1.70E-78 | 3.39E-76 | 520 | 520 |
| COL4A2   | 0.700568646 | 6.07E-78 | 1.20E-75 | 520 | 520 |
| TGFB1I1  | 0.69992347  | 9.62E-78 | 1.88E-75 | 520 | 520 |
| HIC1     | 0.699086032 | 1.74E-77 | 3.38E-75 | 520 | 520 |
| ADAMTS16 | 0.698715338 | 2.27E-77 | 4.36E-75 | 520 | 475 |
| CRISPLD2 | 0.696604554 | 1.01E-76 | 1.91E-74 | 520 | 520 |
| SSC5D    | 0.695871668 | 1.68E-76 | 3.17E-74 | 520 | 520 |
| ADAMTS14 | 0.695814077 | 1.75E-76 | 3.27E-74 | 520 | 520 |
| ECM2     | 0.694441989 | 4.56E-76 | 8.44E-74 | 520 | 520 |
| COL12A1  | 0.693497589 | 8.79E-76 | 1.61E-73 | 520 | 520 |
| VGLL3    | 0.693024179 | 1.22E-75 | 2.22E-73 | 520 | 520 |
| F2R      | 0.693000524 | 1.24E-75 | 2.23E-73 | 520 | 520 |
| IGFBP7   | 0.691853259 | 2.74E-75 | 4.89E-73 | 520 | 520 |
| ALPK2    | 0.690743397 | 5.88E-75 | 1.04E-72 | 520 | 520 |
| ADAMTS4  | 0.690428194 | 7.29E-75 | 1.28E-72 | 520 | 520 |
| KCND2    | 0.689593575 | 1.29E-74 | 2.24E-72 | 520 | 508 |
| CMTM3    | 0.689373612 | 1.50E-74 | 2.58E-72 | 520 | 520 |
| AMPH     | 0.689239309 | 1.64E-74 | 2.81E-72 | 520 | 516 |
| GREM1    | 0.688618202 | 2.51E-74 | 4.25E-72 | 520 | 520 |
| FLJ10357 | 0.688292892 | 3.13E-74 | 5.26E-72 | 520 | 520 |
| FAM26E   | 0.688165421 | 3.41E-74 | 5.68E-72 | 520 | 520 |
| FKBP7    | 0.688140867 | 3.47E-74 | 5.73E-72 | 520 | 519 |
| TPM1     | 0.686783156 | 8.69E-74 | 1.42E-71 | 520 | 520 |
| MAGEL2   | 0.686667297 | 9.40E-74 | 1.53E-71 | 520 | 486 |
| CREB3L1  | 0.685895978 | 1.58E-73 | 2.55E-71 | 520 | 520 |
| CTGF     | 0.685354258 | 2.27E-73 | 3.64E-71 | 520 | 520 |
| LAMB1    | 0.684022089 | 5.54E-73 | 8.80E-71 | 520 | 520 |
| TNS3     | 0.683979259 | 5.70E-73 | 8.98E-71 | 520 | 520 |
| CNN1     | 0.683161479 | 9.83E-73 | 1.54E-70 | 520 | 520 |
| IGDCC4   | 0.681625463 | 2.72E-72 | 4.22E-70 | 520 | 520 |
| CHSY3    | 0.680740048 | 4.88E-72 | 7.52E-70 | 520 | 520 |
| DAAM2    | 0.680138742 | 7.25E-72 | 1.11E-69 | 520 | 520 |
| TGFB3    | 0.679814002 | 8.98E-72 | 1.36E-69 | 520 | 520 |

|          |             |          |          |     |     |
|----------|-------------|----------|----------|-----|-----|
| ENPEP    | 0.67925557  | 1.29E-71 | 1.95E-69 | 520 | 520 |
| TMEM26   | 0.679177116 | 1.36E-71 | 2.04E-69 | 520 | 518 |
| KIF26B   | 0.678864572 | 1.67E-71 | 2.48E-69 | 520 | 520 |
| LHFP     | 0.678512188 | 2.10E-71 | 3.10E-69 | 520 | 520 |
| CERCAM   | 0.6781296   | 2.70E-71 | 3.95E-69 | 520 | 520 |
| LRRC15   | 0.678118214 | 2.72E-71 | 3.95E-69 | 520 | 520 |
| GUCY1A2  | 0.677578431 | 3.87E-71 | 5.57E-69 | 520 | 519 |
| ATP10A   | 0.677543662 | 3.95E-71 | 5.66E-69 | 520 | 520 |
| HHIPL1   | 0.677514272 | 4.03E-71 | 5.72E-69 | 520 | 520 |
| TIMP3    | 0.676930365 | 5.89E-71 | 8.31E-69 | 520 | 520 |
| RECK     | 0.676778283 | 6.50E-71 | 9.10E-69 | 520 | 519 |
| ADAMTS7  | 0.676719303 | 6.75E-71 | 9.39E-69 | 520 | 520 |
| HTRA3    | 0.676332309 | 8.68E-71 | 1.20E-68 | 520 | 520 |
| AGTR1    | 0.67620403  | 9.43E-71 | 1.29E-68 | 520 | 450 |
| LEPRE1   | 0.67555799  | 1.43E-70 | 1.95E-68 | 520 | 520 |
| LRRC17   | 0.675199272 | 1.80E-70 | 2.44E-68 | 520 | 517 |
| RCN3     | 0.675125099 | 1.89E-70 | 2.54E-68 | 520 | 520 |
| ARHGEF17 | 0.674954202 | 2.11E-70 | 2.82E-68 | 520 | 520 |
| SLC24A2  | 0.673423778 | 5.64E-70 | 7.48E-68 | 520 | 455 |
| ENPP1    | 0.673409919 | 5.69E-70 | 7.50E-68 | 520 | 520 |
| PCDH18   | 0.673343118 | 5.94E-70 | 7.77E-68 | 520 | 520 |
| ISLR     | 0.673182138 | 6.58E-70 | 8.56E-68 | 520 | 520 |
| EDNRA    | 0.67303632  | 7.22E-70 | 9.34E-68 | 520 | 520 |
| GPX8     | 0.67232867  | 1.13E-69 | 1.46E-67 | 520 | 520 |
| MAP1A    | 0.669795481 | 5.65E-69 | 7.21E-67 | 520 | 520 |
| SYDE1    | 0.669486174 | 6.87E-69 | 8.71E-67 | 520 | 520 |
| TM6SF2   | 0.668709947 | 1.12E-68 | 1.41E-66 | 520 | 496 |
| FBLN2    | 0.66795013  | 1.80E-68 | 2.26E-66 | 520 | 520 |
| FNDC1    | 0.66732673  | 2.66E-68 | 3.31E-66 | 520 | 520 |
| S1PR3    | 0.666719777 | 3.89E-68 | 4.81E-66 | 520 | 520 |
| ZCCHC24  | 0.666410428 | 4.71E-68 | 5.80E-66 | 520 | 520 |
| SGIP1    | 0.666277601 | 5.12E-68 | 6.26E-66 | 520 | 520 |
| PGCP     | 0.666011854 | 6.04E-68 | 7.34E-66 | 520 | 520 |
| CCIN     | 0.665725668 | 7.21E-68 | 8.71E-66 | 520 | 474 |
| DDR2     | 0.664648077 | 1.41E-67 | 1.69E-65 | 520 | 518 |
| CNRIP1   | 0.662516661 | 5.22E-67 | 6.23E-65 | 520 | 520 |
| CPXM1    | 0.662082793 | 6.82E-67 | 8.08E-65 | 520 | 520 |
| WISP1    | 0.661431863 | 1.01E-66 | 1.20E-64 | 520 | 519 |
| ANGPTL2  | 0.66097969  | 1.34E-66 | 1.57E-64 | 520 | 520 |
| LOXL3    | 0.660528333 | 1.76E-66 | 2.05E-64 | 520 | 519 |
| SPOCK1   | 0.659980344 | 2.46E-66 | 2.85E-64 | 520 | 520 |
| GALNTL2  | 0.659791569 | 2.75E-66 | 3.17E-64 | 520 | 520 |
| PPEF1    | 0.659143199 | 4.08E-66 | 4.67E-64 | 520 | 516 |
| THBS1    | 0.657278    | 1.26E-65 | 1.43E-63 | 520 | 520 |
| UNC5C    | 0.657077504 | 1.42E-65 | 1.61E-63 | 520 | 475 |
| C6orf174 | 0.655976524 | 2.74E-65 | 3.09E-63 | 520 | 516 |

|             |             |          |          |     |     |
|-------------|-------------|----------|----------|-----|-----|
| ANTXR1      | 0.655746359 | 3.15E-65 | 3.52E-63 | 520 | 520 |
| PLXDC1      | 0.655085319 | 4.67E-65 | 5.20E-63 | 520 | 520 |
| TMEM200A    | 0.651975702 | 2.94E-64 | 3.26E-62 | 520 | 518 |
| ZNF423      | 0.651730456 | 3.40E-64 | 3.75E-62 | 520 | 520 |
| ADAM19      | 0.650837647 | 5.75E-64 | 6.30E-62 | 520 | 520 |
| KIAA1755    | 0.650785233 | 5.93E-64 | 6.46E-62 | 520 | 518 |
| RUNX2       | 0.65051201  | 6.96E-64 | 7.54E-62 | 520 | 520 |
| HMCN1       | 0.649736754 | 1.09E-63 | 1.18E-61 | 520 | 520 |
| SERPINH1    | 0.649669806 | 1.14E-63 | 1.22E-61 | 520 | 520 |
| MMP11       | 0.648689487 | 2.02E-63 | 2.15E-61 | 520 | 520 |
| PALM2-AKAP2 | 0.64768588  | 3.61E-63 | 3.83E-61 | 520 | 520 |
| LTBP2       | 0.647343402 | 4.40E-63 | 4.65E-61 | 520 | 520 |
| C16orf45    | 0.647300731 | 4.51E-63 | 4.74E-61 | 520 | 520 |
| ABCC9       | 0.646661469 | 6.53E-63 | 6.82E-61 | 520 | 519 |
| MRC2        | 0.646524367 | 7.06E-63 | 7.34E-61 | 520 | 520 |
| CHN1        | 0.646510374 | 7.12E-63 | 7.36E-61 | 520 | 520 |
| CSMD2       | 0.646001896 | 9.55E-63 | 9.82E-61 | 520 | 520 |
| PDE3A       | 0.645339195 | 1.40E-62 | 1.43E-60 | 520 | 512 |
| SLC41A2     | 0.645133947 | 1.57E-62 | 1.60E-60 | 520 | 520 |
| PARVA       | 0.645092544 | 1.61E-62 | 1.63E-60 | 520 | 520 |
| DACT3       | 0.643636471 | 3.71E-62 | 3.74E-60 | 520 | 520 |
| CHRD        | 0.643049664 | 5.18E-62 | 5.19E-60 | 520 | 520 |
| CACNA1C     | 0.642510019 | 7.04E-62 | 7.03E-60 | 520 | 520 |
| ZNF521      | 0.641666227 | 1.14E-61 | 1.13E-59 | 520 | 520 |
| PRRX1       | 0.641324068 | 1.38E-61 | 1.36E-59 | 520 | 520 |
| ITGA5       | 0.640856983 | 1.80E-61 | 1.77E-59 | 520 | 520 |
| PCDH12      | 0.640844927 | 1.81E-61 | 1.77E-59 | 520 | 520 |
| GGT5        | 0.640840914 | 1.81E-61 | 1.77E-59 | 520 | 520 |
| TCEAL7      | 0.64057852  | 2.10E-61 | 2.04E-59 | 520 | 517 |
| MRAS        | 0.640531555 | 2.16E-61 | 2.08E-59 | 520 | 520 |
| JAM3        | 0.640236785 | 2.55E-61 | 2.45E-59 | 520 | 520 |
| NAP1L3      | 0.639976833 | 2.95E-61 | 2.82E-59 | 520 | 513 |
| WNT2        | 0.636564253 | 1.99E-60 | 1.89E-58 | 520 | 516 |
| FILIP1L     | 0.635795155 | 3.05E-60 | 2.89E-58 | 520 | 520 |
| MATN3       | 0.635191782 | 4.26E-60 | 4.01E-58 | 520 | 519 |
| CDR1        | 0.634995513 | 4.75E-60 | 4.45E-58 | 520 | 425 |
| GXYLT2      | 0.634382456 | 6.66E-60 | 6.22E-58 | 520 | 519 |
| SHANK1      | 0.634042222 | 8.04E-60 | 7.47E-58 | 520 | 499 |
| GUCY1A3     | 0.632606014 | 1.77E-59 | 1.64E-57 | 520 | 520 |
| FBXL7       | 0.632503612 | 1.87E-59 | 1.72E-57 | 520 | 520 |
| EVC         | 0.632252105 | 2.15E-59 | 1.97E-57 | 520 | 520 |
| KDELR3      | 0.632238573 | 2.16E-59 | 1.97E-57 | 520 | 520 |
| EPDR1       | 0.631894551 | 2.61E-59 | 2.37E-57 | 520 | 518 |
| NUAK1       | 0.63151576  | 3.21E-59 | 2.90E-57 | 520 | 520 |
| EBF1        | 0.631321211 | 3.57E-59 | 3.21E-57 | 520 | 520 |
| FAM101A     | 0.631067896 | 4.10E-59 | 3.67E-57 | 520 | 519 |

|            |             |          |          |     |     |
|------------|-------------|----------|----------|-----|-----|
| FAM176A    | 0.63101777  | 4.21E-59 | 3.76E-57 | 520 | 520 |
| C5orf13    | 0.630577625 | 5.35E-59 | 4.75E-57 | 520 | 520 |
| TSHZ3      | 0.630050677 | 7.13E-59 | 6.30E-57 | 520 | 520 |
| PDGFB      | 0.629601472 | 9.09E-59 | 8.01E-57 | 520 | 520 |
| FKBP10     | 0.628740024 | 1.45E-58 | 1.27E-56 | 520 | 520 |
| NID1       | 0.628464699 | 1.68E-58 | 1.47E-56 | 520 | 520 |
| LAMB2      | 0.628444845 | 1.70E-58 | 1.48E-56 | 520 | 520 |
| CSGALNACT2 | 0.627762416 | 2.45E-58 | 2.12E-56 | 520 | 520 |
| DCN        | 0.627518575 | 2.80E-58 | 2.41E-56 | 520 | 520 |
| TBXA2R     | 0.626458067 | 4.95E-58 | 4.24E-56 | 520 | 520 |
| TMEM47     | 0.626016178 | 6.26E-58 | 5.35E-56 | 520 | 520 |
| DCHS1      | 0.625954786 | 6.47E-58 | 5.51E-56 | 520 | 520 |
| KCNJ8      | 0.625628371 | 7.71E-58 | 6.53E-56 | 520 | 520 |
| LMCD1      | 0.625294651 | 9.21E-58 | 7.77E-56 | 520 | 520 |
| RCAN2      | 0.624434381 | 1.46E-57 | 1.22E-55 | 520 | 520 |
| ASPN       | 0.6240169   | 1.82E-57 | 1.52E-55 | 520 | 520 |
| SAMD14     | 0.623904416 | 1.93E-57 | 1.61E-55 | 520 | 519 |
| CCDC80     | 0.622597826 | 3.85E-57 | 3.20E-55 | 520 | 520 |
| RHOJ       | 0.622551126 | 3.95E-57 | 3.27E-55 | 520 | 520 |
| LPAR4      | 0.621223331 | 7.95E-57 | 6.55E-55 | 520 | 482 |
| DLG4       | 0.620710034 | 1.04E-56 | 8.54E-55 | 520 | 520 |
| PTPRM      | 0.620596052 | 1.11E-56 | 9.03E-55 | 520 | 520 |
| DOK5       | 0.620153639 | 1.39E-56 | 1.13E-54 | 520 | 516 |
| TMEM119    | 0.618905288 | 2.68E-56 | 2.17E-54 | 520 | 520 |
| LAMC1      | 0.617657299 | 5.12E-56 | 4.13E-54 | 520 | 520 |
| C9orf110   | 0.617338528 | 6.04E-56 | 4.85E-54 | 520 | 520 |
| NRP1       | 0.617082097 | 6.90E-56 | 5.52E-54 | 520 | 520 |
| BTBD19     | 0.615001648 | 2.02E-55 | 1.61E-53 | 520 | 516 |
| SNAI1      | 0.614220316 | 3.01E-55 | 2.39E-53 | 520 | 520 |
| MFRP       | 0.613460935 | 4.45E-55 | 3.52E-53 | 520 | 520 |
| RHOBTB1    | 0.61237337  | 7.74E-55 | 6.10E-53 | 520 | 520 |
| FMNL3      | 0.611431568 | 1.25E-54 | 9.80E-53 | 520 | 520 |
| EBF2       | 0.610965409 | 1.58E-54 | 1.24E-52 | 520 | 478 |
| PCDHGA12   | 0.61079447  | 1.73E-54 | 1.34E-52 | 520 | 508 |
| PDGFRL     | 0.610457385 | 2.05E-54 | 1.59E-52 | 520 | 518 |
| ANXA6      | 0.608917213 | 4.45E-54 | 3.44E-52 | 520 | 520 |
| LAMA2      | 0.608831814 | 4.65E-54 | 3.58E-52 | 520 | 520 |
| CHSY1      | 0.608462098 | 5.59E-54 | 4.29E-52 | 520 | 520 |
| DOK6       | 0.60839055  | 5.80E-54 | 4.43E-52 | 520 | 514 |
| ARSB       | 0.608266672 | 6.17E-54 | 4.70E-52 | 520 | 520 |
| C1QTNF6    | 0.607872349 | 7.52E-54 | 5.70E-52 | 520 | 520 |
| LHFPL2     | 0.607208706 | 1.05E-53 | 7.92E-52 | 520 | 520 |
| ARMC9      | 0.606725913 | 1.33E-53 | 1.00E-51 | 520 | 520 |
| LMOD1      | 0.606594049 | 1.42E-53 | 1.07E-51 | 520 | 520 |
| TMEM90B    | 0.60615983  | 1.77E-53 | 1.32E-51 | 520 | 514 |
| CYS1       | 0.606151346 | 1.78E-53 | 1.32E-51 | 520 | 520 |

|          |             |          |          |     |     |
|----------|-------------|----------|----------|-----|-----|
| RGS4     | 0.605350823 | 2.65E-53 | 1.96E-51 | 520 | 520 |
| GAS1     | 0.60519331  | 2.86E-53 | 2.11E-51 | 520 | 520 |
| CD248    | 0.60498243  | 3.18E-53 | 2.34E-51 | 520 | 520 |
| C12orf23 | 0.604976664 | 3.18E-53 | 2.34E-51 | 520 | 520 |
| CLSTN2   | 0.604774422 | 3.52E-53 | 2.57E-51 | 520 | 519 |
| LRCH2    | 0.604459856 | 4.11E-53 | 2.99E-51 | 520 | 519 |
| F13A1    | 0.603657977 | 6.12E-53 | 4.44E-51 | 520 | 520 |
| KANK2    | 0.602521473 | 1.07E-52 | 7.74E-51 | 520 | 520 |
| PNMA2    | 0.602401239 | 1.14E-52 | 8.18E-51 | 520 | 518 |
| ANPEP    | 0.602280646 | 1.20E-52 | 8.65E-51 | 520 | 520 |
| SYT11    | 0.602140447 | 1.29E-52 | 9.23E-51 | 520 | 520 |
| ST8SIA2  | 0.60204513  | 1.35E-52 | 9.64E-51 | 520 | 517 |
| DCLK3    | 0.601816462 | 1.51E-52 | 1.07E-50 | 520 | 518 |
| EDA2R    | 0.60169809  | 1.60E-52 | 1.13E-50 | 520 | 514 |
| DIXDC1   | 0.601413366 | 1.84E-52 | 1.30E-50 | 520 | 520 |
| GPR116   | 0.601209614 | 2.04E-52 | 1.43E-50 | 520 | 520 |
| C14orf37 | 0.600604004 | 2.74E-52 | 1.92E-50 | 520 | 520 |
| ADAMTSL1 | 0.600576181 | 2.78E-52 | 1.94E-50 | 520 | 519 |
| COL15A1  | 0.599567872 | 4.54E-52 | 3.16E-50 | 520 | 520 |
| GPR173   | 0.599264596 | 5.26E-52 | 3.64E-50 | 520 | 501 |
| PTK7     | 0.599088959 | 5.73E-52 | 3.96E-50 | 520 | 520 |
| RASA3    | 0.598493336 | 7.65E-52 | 5.26E-50 | 520 | 520 |
| LUM      | 0.598486814 | 7.67E-52 | 5.26E-50 | 520 | 520 |
| CNIH3    | 0.597927984 | 1.01E-51 | 6.87E-50 | 520 | 518 |
| SEC24D   | 0.597626356 | 1.16E-51 | 7.93E-50 | 520 | 520 |
| TNN      | 0.595844822 | 2.74E-51 | 1.86E-49 | 520 | 514 |
| TMEM204  | 0.595556888 | 3.15E-51 | 2.13E-49 | 520 | 520 |
| TWIST1   | 0.595532461 | 3.19E-51 | 2.15E-49 | 520 | 520 |
| SOX11    | 0.595337595 | 3.50E-51 | 2.35E-49 | 520 | 518 |
| STARD8   | 0.594791949 | 4.55E-51 | 3.05E-49 | 520 | 520 |
| FBLN5    | 0.594244983 | 5.90E-51 | 3.94E-49 | 520 | 520 |
| NHSL2    | 0.594164587 | 6.14E-51 | 4.08E-49 | 520 | 516 |
| COL18A1  | 0.594140492 | 6.21E-51 | 4.12E-49 | 520 | 520 |
| FMOD     | 0.594012163 | 6.60E-51 | 4.36E-49 | 520 | 520 |
| SH3RF3   | 0.593049    | 1.04E-50 | 6.88E-49 | 520 | 520 |
| ASAM     | 0.592682266 | 1.24E-50 | 8.16E-49 | 520 | 520 |
| PTGDR    | 0.592267839 | 1.51E-50 | 9.90E-49 | 520 | 515 |
| AOC3     | 0.59225148  | 1.52E-50 | 9.95E-49 | 520 | 520 |
| CD93     | 0.59214269  | 1.61E-50 | 1.04E-48 | 520 | 520 |
| SRPX     | 0.591960179 | 1.75E-50 | 1.13E-48 | 520 | 520 |
| DIRC1    | 0.590894112 | 2.90E-50 | 1.87E-48 | 520 | 412 |
| PTPRN    | 0.590642099 | 3.26E-50 | 2.10E-48 | 520 | 508 |
| CLEC11A  | 0.590445657 | 3.58E-50 | 2.30E-48 | 520 | 520 |
| ENOX1    | 0.590197147 | 4.02E-50 | 2.58E-48 | 520 | 517 |
| PMEPA1   | 0.590169365 | 4.08E-50 | 2.60E-48 | 520 | 520 |
| CPZ      | 0.589949988 | 4.52E-50 | 2.88E-48 | 520 | 520 |

|           |             |          |          |     |     |
|-----------|-------------|----------|----------|-----|-----|
| SCG5      | 0.589838797 | 4.76E-50 | 3.02E-48 | 520 | 520 |
| RAB3IL1   | 0.589707152 | 5.07E-50 | 3.20E-48 | 520 | 520 |
| SSPN      | 0.589674256 | 5.15E-50 | 3.24E-48 | 520 | 520 |
| GPR4      | 0.589660231 | 5.18E-50 | 3.25E-48 | 520 | 520 |
| C13orf33  | 0.58965217  | 5.20E-50 | 3.26E-48 | 520 | 520 |
| MARVELD1  | 0.588252707 | 1.00E-49 | 6.26E-48 | 520 | 520 |
| FZD4      | 0.587997291 | 1.13E-49 | 7.03E-48 | 520 | 520 |
| PLXNC1    | 0.587638535 | 1.34E-49 | 8.28E-48 | 520 | 519 |
| C10orf72  | 0.587423296 | 1.48E-49 | 9.13E-48 | 520 | 520 |
| ODZ3      | 0.586845643 | 1.93E-49 | 1.19E-47 | 520 | 520 |
| KANK4     | 0.586632024 | 2.13E-49 | 1.31E-47 | 520 | 517 |
| PPFIA2    | 0.586625269 | 2.14E-49 | 1.31E-47 | 520 | 440 |
| NNMT      | 0.585726516 | 3.25E-49 | 1.99E-47 | 520 | 520 |
| FGFR1     | 0.585395324 | 3.79E-49 | 2.31E-47 | 520 | 520 |
| PDGFC     | 0.585290583 | 3.98E-49 | 2.41E-47 | 520 | 520 |
| ENC1      | 0.585159941 | 4.22E-49 | 2.56E-47 | 520 | 520 |
| HSPG2     | 0.584732092 | 5.15E-49 | 3.11E-47 | 520 | 520 |
| C4orf31   | 0.58452482  | 5.66E-49 | 3.41E-47 | 520 | 510 |
| TTYH3     | 0.584391183 | 6.03E-49 | 3.61E-47 | 520 | 520 |
| PRSS23    | 0.584390094 | 6.03E-49 | 3.61E-47 | 520 | 520 |
| SFRP4     | 0.584278585 | 6.35E-49 | 3.79E-47 | 520 | 520 |
| TIE1      | 0.583731396 | 8.17E-49 | 4.86E-47 | 520 | 520 |
| RASL12    | 0.583678953 | 8.37E-49 | 4.96E-47 | 520 | 520 |
| SCG2      | 0.583277602 | 1.01E-48 | 5.95E-47 | 520 | 520 |
| ST6GAL2   | 0.582738498 | 1.29E-48 | 7.58E-47 | 520 | 509 |
| ARHGAP31  | 0.582736226 | 1.29E-48 | 7.58E-47 | 520 | 520 |
| MFAP5     | 0.582177636 | 1.67E-48 | 9.77E-47 | 520 | 520 |
| SLC39A14  | 0.580764344 | 3.18E-48 | 1.86E-46 | 520 | 520 |
| NPR2      | 0.58002891  | 4.44E-48 | 2.59E-46 | 520 | 520 |
| RAI14     | 0.579533586 | 5.56E-48 | 3.23E-46 | 520 | 520 |
| PODN      | 0.579520659 | 5.59E-48 | 3.24E-46 | 520 | 520 |
| RUNX1T1   | 0.579217457 | 6.42E-48 | 3.71E-46 | 520 | 498 |
| PRKG1     | 0.579177381 | 6.54E-48 | 3.77E-46 | 520 | 513 |
| FAM19A5   | 0.579106802 | 6.75E-48 | 3.88E-46 | 520 | 520 |
| KIAA1024  | 0.578621321 | 8.41E-48 | 4.82E-46 | 520 | 519 |
| SPON1     | 0.577975207 | 1.13E-47 | 6.43E-46 | 520 | 520 |
| DENND2A   | 0.577720847 | 1.26E-47 | 7.19E-46 | 520 | 520 |
| CCDC102B  | 0.577177702 | 1.61E-47 | 9.16E-46 | 520 | 520 |
| SYNE1     | 0.577115839 | 1.66E-47 | 9.39E-46 | 520 | 520 |
| VEPH1     | 0.576673415 | 2.02E-47 | 1.14E-45 | 520 | 496 |
| HEG1      | 0.57503004  | 4.22E-47 | 2.38E-45 | 520 | 520 |
| ACVRL1    | 0.574616643 | 5.08E-47 | 2.85E-45 | 520 | 520 |
| FYN       | 0.574363728 | 5.69E-47 | 3.19E-45 | 520 | 520 |
| C20orf103 | 0.574175711 | 6.18E-47 | 3.45E-45 | 520 | 520 |
| C3orf18   | 0.573932695 | 6.89E-47 | 3.84E-45 | 520 | 520 |
| LATS2     | 0.57384187  | 7.18E-47 | 3.99E-45 | 520 | 520 |



|          |             |          |          |     |     |
|----------|-------------|----------|----------|-----|-----|
| FAM101B  | 0.573623947 | 7.91E-47 | 4.38E-45 | 520 | 520 |
| SGCB     | 0.573203187 | 9.53E-47 | 5.27E-45 | 520 | 520 |
| GIPC3    | 0.573073528 | 1.01E-46 | 5.56E-45 | 520 | 520 |
| ACSS3    | 0.57187009  | 1.72E-46 | 9.45E-45 | 520 | 512 |
| PLXND1   | 0.571731628 | 1.83E-46 | 1.00E-44 | 520 | 520 |
| RASSF8   | 0.571500072 | 2.03E-46 | 1.11E-44 | 520 | 520 |
| PDGFRA   | 0.571313871 | 2.20E-46 | 1.20E-44 | 520 | 520 |
| INHBA    | 0.570973473 | 2.55E-46 | 1.39E-44 | 520 | 520 |
| NEGR1    | 0.570963619 | 2.57E-46 | 1.39E-44 | 520 | 518 |
| RUNX1    | 0.57072388  | 2.85E-46 | 1.54E-44 | 520 | 520 |
| A2M      | 0.570690181 | 2.89E-46 | 1.56E-44 | 520 | 520 |
| SLC2A3   | 0.57050053  | 3.15E-46 | 1.69E-44 | 520 | 520 |
| MME      | 0.570491013 | 3.16E-46 | 1.69E-44 | 520 | 520 |
| WDR86    | 0.570320434 | 3.41E-46 | 1.82E-44 | 520 | 517 |
| PTPRG    | 0.570135693 | 3.69E-46 | 1.97E-44 | 520 | 520 |
| FLJ22536 | 0.569957255 | 3.99E-46 | 2.13E-44 | 520 | 519 |
| SGK269   | 0.56892269  | 6.29E-46 | 3.34E-44 | 520 | 520 |
| ALDH1B1  | 0.568761693 | 6.74E-46 | 3.57E-44 | 520 | 520 |
| CACNA1H  | 0.568611973 | 7.20E-46 | 3.80E-44 | 520 | 520 |
| PDZRN3   | 0.56843595  | 7.78E-46 | 4.09E-44 | 520 | 520 |
| CDK14    | 0.568305515 | 8.23E-46 | 4.32E-44 | 520 | 520 |
| ETS1     | 0.567561012 | 1.14E-45 | 5.96E-44 | 520 | 520 |
| DSEL     | 0.567299346 | 1.28E-45 | 6.67E-44 | 520 | 520 |
| ITGBL1   | 0.567039667 | 1.43E-45 | 7.44E-44 | 520 | 519 |
| PTH1R    | 0.566676925 | 1.67E-45 | 8.69E-44 | 520 | 520 |
| NALCN    | 0.566576875 | 1.75E-45 | 9.04E-44 | 520 | 463 |
| SLC2A14  | 0.566575072 | 1.75E-45 | 9.04E-44 | 520 | 517 |
| BST1     | 0.566400192 | 1.89E-45 | 9.73E-44 | 520 | 520 |
| PPAPDC3  | 0.565961291 | 2.28E-45 | 1.17E-43 | 520 | 520 |
| LOXL1    | 0.5650927   | 3.32E-45 | 1.70E-43 | 520 | 520 |
| HAS2     | 0.564617405 | 4.08E-45 | 2.09E-43 | 520 | 520 |
| CORO2B   | 0.564548408 | 4.20E-45 | 2.14E-43 | 520 | 516 |
| ATP8B2   | 0.564290433 | 4.69E-45 | 2.39E-43 | 520 | 520 |
| RUSC2    | 0.564087634 | 5.12E-45 | 2.60E-43 | 520 | 520 |
| TNS1     | 0.563984032 | 5.36E-45 | 2.71E-43 | 520 | 520 |
| TMEM55A  | 0.563656928 | 6.16E-45 | 3.12E-43 | 520 | 520 |
| DYSF     | 0.563202971 | 7.49E-45 | 3.78E-43 | 520 | 520 |
| TCF4     | 0.563191506 | 7.53E-45 | 3.79E-43 | 520 | 520 |
| CLIC4    | 0.562730026 | 9.17E-45 | 4.60E-43 | 520 | 520 |
| CEP170   | 0.562382515 | 1.06E-44 | 5.33E-43 | 520 | 520 |
| MGRPRF   | 0.561888546 | 1.31E-44 | 6.56E-43 | 520 | 520 |
| ANTXR2   | 0.561721837 | 1.41E-44 | 7.03E-43 | 520 | 520 |
| TMEM2    | 0.561597013 | 1.49E-44 | 7.40E-43 | 520 | 520 |
| LDB2     | 0.561494057 | 1.56E-44 | 7.71E-43 | 520 | 520 |
| EDIL3    | 0.561390417 | 1.63E-44 | 8.04E-43 | 520 | 514 |
| MEIS3    | 0.561039642 | 1.89E-44 | 9.31E-43 | 520 | 520 |

|           |             |          |          |     |     |
|-----------|-------------|----------|----------|-----|-----|
| MSC       | 0.560900184 | 2.00E-44 | 9.86E-43 | 520 | 520 |
| FGD5      | 0.560573077 | 2.30E-44 | 1.13E-42 | 520 | 520 |
| TMEFF1    | 0.560124615 | 2.79E-44 | 1.36E-42 | 520 | 520 |
| KDELC1    | 0.560109536 | 2.80E-44 | 1.37E-42 | 520 | 520 |
| KCTD12    | 0.560005768 | 2.93E-44 | 1.43E-42 | 520 | 520 |
| GUCY1B3   | 0.559447835 | 3.71E-44 | 1.80E-42 | 520 | 520 |
| CHST15    | 0.559370354 | 3.84E-44 | 1.86E-42 | 520 | 520 |
| LOC399959 | 0.559001947 | 4.48E-44 | 2.17E-42 | 520 | 520 |
| PKD2      | 0.558951989 | 4.58E-44 | 2.21E-42 | 520 | 520 |
| AK5       | 0.558813802 | 4.86E-44 | 2.34E-42 | 520 | 510 |
| LZTS1     | 0.557985141 | 6.89E-44 | 3.31E-42 | 520 | 520 |
| TSPAN2    | 0.557918756 | 7.08E-44 | 3.39E-42 | 520 | 518 |
| DCLK1     | 0.557840175 | 7.32E-44 | 3.50E-42 | 520 | 516 |
| HSPA12B   | 0.557799602 | 7.45E-44 | 3.55E-42 | 520 | 520 |
| LOC149837 | 0.557649963 | 7.93E-44 | 3.77E-42 | 520 | 512 |
| PGM2L1    | 0.556983564 | 1.05E-43 | 4.98E-42 | 520 | 520 |
| FBLN7     | 0.556799891 | 1.13E-43 | 5.37E-42 | 520 | 520 |
| PTGER2    | 0.556377262 | 1.35E-43 | 6.39E-42 | 520 | 519 |
| LEPREL2   | 0.556342022 | 1.37E-43 | 6.47E-42 | 520 | 520 |
| NKX3-2    | 0.556223994 | 1.44E-43 | 6.79E-42 | 520 | 504 |
| BMP1      | 0.55613754  | 1.50E-43 | 7.02E-42 | 520 | 520 |
| NTNG2     | 0.555518355 | 1.94E-43 | 9.07E-42 | 520 | 519 |
| ARHGAP6   | 0.555514329 | 1.94E-43 | 9.07E-42 | 520 | 518 |
| TGFB2     | 0.55440366  | 3.09E-43 | 1.44E-41 | 520 | 520 |
| EPHA3     | 0.554267986 | 3.27E-43 | 1.52E-41 | 520 | 518 |
| GRID1     | 0.553540514 | 4.42E-43 | 2.05E-41 | 520 | 519 |
| SPON2     | 0.552678536 | 6.32E-43 | 2.92E-41 | 520 | 520 |
| APBB2     | 0.552611892 | 6.50E-43 | 2.99E-41 | 520 | 520 |
| PLBD2     | 0.552609441 | 6.51E-43 | 2.99E-41 | 520 | 520 |
| ZCCHC5    | 0.552595718 | 6.54E-43 | 3.01E-41 | 520 | 429 |
| PRKCA     | 0.552149416 | 7.87E-43 | 3.61E-41 | 520 | 520 |
| STX2      | 0.552028775 | 8.27E-43 | 3.78E-41 | 520 | 520 |
| PKIG      | 0.551403536 | 1.07E-42 | 4.88E-41 | 520 | 520 |
| PAPSS2    | 0.551243183 | 1.14E-42 | 5.21E-41 | 520 | 520 |
| SLC2A10   | 0.551108566 | 1.21E-42 | 5.49E-41 | 520 | 519 |
| LPPR4     | 0.549670523 | 2.18E-42 | 9.89E-41 | 520 | 518 |
| PRICKLE1  | 0.549363685 | 2.47E-42 | 1.12E-40 | 520 | 520 |
| TUBA1A    | 0.548891871 | 3.00E-42 | 1.35E-40 | 520 | 520 |
| OMD       | 0.548005712 | 4.31E-42 | 1.94E-40 | 520 | 508 |
| CORIN     | 0.547994211 | 4.33E-42 | 1.94E-40 | 520 | 520 |
| HTRA1     | 0.547196073 | 5.99E-42 | 2.68E-40 | 520 | 520 |
| VASH1     | 0.547119508 | 6.18E-42 | 2.76E-40 | 520 | 520 |
| MYADM     | 0.546915221 | 6.71E-42 | 3.00E-40 | 520 | 520 |
| FKBP14    | 0.546642929 | 7.50E-42 | 3.34E-40 | 520 | 520 |
| GLIS2     | 0.546410385 | 8.24E-42 | 3.66E-40 | 520 | 520 |
| RBMS3     | 0.546308482 | 8.59E-42 | 3.81E-40 | 520 | 518 |

|          |             |          |          |     |     |
|----------|-------------|----------|----------|-----|-----|
| SH3PXD2B | 0.546092169 | 9.37E-42 | 4.15E-40 | 520 | 520 |
| AKAP2    | 0.545909107 | 1.01E-41 | 4.45E-40 | 520 | 509 |
| CXCL12   | 0.545845221 | 1.04E-41 | 4.56E-40 | 520 | 520 |
| FUT8     | 0.545781944 | 1.06E-41 | 4.67E-40 | 520 | 520 |
| FNDC3B   | 0.54536434  | 1.26E-41 | 5.52E-40 | 520 | 520 |
| SGCE     | 0.544017083 | 2.17E-41 | 9.47E-40 | 520 | 519 |
| MPDZ     | 0.543192054 | 3.02E-41 | 1.32E-39 | 520 | 519 |
| SNTB1    | 0.543058883 | 3.18E-41 | 1.39E-39 | 520 | 520 |
| RXFP3    | 0.542875526 | 3.42E-41 | 1.49E-39 | 520 | 278 |
| MMP13    | 0.542742271 | 3.61E-41 | 1.57E-39 | 520 | 520 |
| MMP8     | 0.542597544 | 3.83E-41 | 1.66E-39 | 520 | 448 |
| ADAMTS10 | 0.542502408 | 3.98E-41 | 1.72E-39 | 520 | 520 |
| CLIP3    | 0.542437931 | 4.08E-41 | 1.76E-39 | 520 | 520 |
| GNAI2    | 0.542209958 | 4.47E-41 | 1.92E-39 | 520 | 520 |
| AFAP1    | 0.541996089 | 4.87E-41 | 2.09E-39 | 520 | 520 |
| FAM196B  | 0.541545303 | 5.83E-41 | 2.49E-39 | 520 | 443 |
| MAP1B    | 0.541458023 | 6.03E-41 | 2.58E-39 | 520 | 520 |
| AKT3     | 0.54105516  | 7.08E-41 | 3.02E-39 | 520 | 520 |
| IL1R1    | 0.54092504  | 7.46E-41 | 3.17E-39 | 520 | 520 |
| AMPD2    | 0.540554196 | 8.64E-41 | 3.67E-39 | 520 | 520 |
| CDH5     | 0.539759323 | 1.19E-40 | 5.02E-39 | 520 | 520 |
| SH2B3    | 0.539396908 | 1.37E-40 | 5.78E-39 | 520 | 520 |
| FLT4     | 0.538808228 | 1.73E-40 | 7.28E-39 | 520 | 520 |
| GALNT10  | 0.53874678  | 1.77E-40 | 7.45E-39 | 520 | 520 |
| 11-Sep   | 0.538728118 | 1.78E-40 | 7.49E-39 | 520 | 520 |
| CYR61    | 0.538659338 | 1.83E-40 | 7.68E-39 | 520 | 520 |
| KLF17    | 0.538209921 | 2.19E-40 | 9.15E-39 | 520 | 379 |
| JAM2     | 0.53812564  | 2.26E-40 | 9.44E-39 | 520 | 519 |
| PRUNE2   | 0.538096243 | 2.29E-40 | 9.53E-39 | 520 | 520 |
| APCDD1L  | 0.53732578  | 3.10E-40 | 1.29E-38 | 520 | 519 |
| ZFPM2    | 0.537318729 | 3.11E-40 | 1.29E-38 | 520 | 518 |
| CDK15    | 0.536993818 | 3.53E-40 | 1.46E-38 | 520 | 430 |
| NFATC4   | 0.536990829 | 3.53E-40 | 1.46E-38 | 520 | 520 |
| MRV1     | 0.536720869 | 3.93E-40 | 1.62E-38 | 520 | 520 |
| SPOCD1   | 0.536453359 | 4.36E-40 | 1.80E-38 | 520 | 520 |
| CYTH3    | 0.536310264 | 4.61E-40 | 1.89E-38 | 520 | 520 |
| SLC45A1  | 0.535785095 | 5.67E-40 | 2.32E-38 | 520 | 516 |
| MAGEH1   | 0.535562594 | 6.18E-40 | 2.53E-38 | 520 | 520 |
| METTL11B | 0.534663087 | 8.78E-40 | 3.58E-38 | 520 | 405 |
| IBSP     | 0.534602418 | 8.99E-40 | 3.66E-38 | 520 | 503 |
| DKK3     | 0.534476504 | 9.44E-40 | 3.84E-38 | 520 | 520 |
| ANO6     | 0.53427455  | 1.02E-39 | 4.14E-38 | 520 | 520 |
| ADAMTSL2 | 0.534194183 | 1.05E-39 | 4.27E-38 | 520 | 520 |
| NRP2     | 0.534162229 | 1.07E-39 | 4.31E-38 | 520 | 520 |
| FLT1     | 0.533962592 | 1.15E-39 | 4.65E-38 | 520 | 520 |
| TIMP1    | 0.533709443 | 1.27E-39 | 5.12E-38 | 520 | 520 |

|            |             |          |          |     |     |
|------------|-------------|----------|----------|-----|-----|
| GLIS1      | 0.533390538 | 1.44E-39 | 5.79E-38 | 520 | 520 |
| TLR4       | 0.532105489 | 2.37E-39 | 9.50E-38 | 520 | 520 |
| DGKI       | 0.531990092 | 2.48E-39 | 9.91E-38 | 520 | 507 |
| THBS4      | 0.531103634 | 3.49E-39 | 1.39E-37 | 520 | 518 |
| ELTD1      | 0.530866245 | 3.82E-39 | 1.52E-37 | 520 | 520 |
| SHROOM4    | 0.530235094 | 4.87E-39 | 1.94E-37 | 520 | 520 |
| SRPX2      | 0.529517504 | 6.41E-39 | 2.54E-37 | 520 | 520 |
| AG2        | 0.529267282 | 7.06E-39 | 2.80E-37 | 520 | 520 |
| ACTG2      | 0.529039932 | 7.70E-39 | 3.04E-37 | 520 | 520 |
| FGF5       | 0.528395076 | 9.85E-39 | 3.89E-37 | 520 | 457 |
| TGFBR2     | 0.528274958 | 1.03E-38 | 4.06E-37 | 520 | 520 |
| STK32B     | 0.527866162 | 1.20E-38 | 4.74E-37 | 520 | 520 |
| ITGB1      | 0.527697479 | 1.28E-38 | 5.04E-37 | 520 | 520 |
| ACAN       | 0.527619935 | 1.32E-38 | 5.18E-37 | 520 | 520 |
| MMP9       | 0.527537931 | 1.37E-38 | 5.33E-37 | 520 | 520 |
| CILP       | 0.527450334 | 1.41E-38 | 5.50E-37 | 520 | 516 |
| ST6GALNAC5 | 0.527192512 | 1.56E-38 | 6.06E-37 | 520 | 518 |
| ZNF697     | 0.526517711 | 2.01E-38 | 7.81E-37 | 520 | 520 |
| GFPT2      | 0.526225442 | 2.25E-38 | 8.71E-37 | 520 | 520 |
| ACVR1      | 0.525635762 | 2.81E-38 | 1.09E-36 | 520 | 520 |
| CPN2       | 0.52528599  | 3.21E-38 | 1.24E-36 | 520 | 421 |
| HTR1B      | 0.524574082 | 4.19E-38 | 1.62E-36 | 520 | 413 |
| SEC23A     | 0.524529859 | 4.26E-38 | 1.64E-36 | 520 | 520 |
| PAPPA      | 0.524315354 | 4.62E-38 | 1.78E-36 | 520 | 520 |
| C1QTNF1    | 0.524037249 | 5.13E-38 | 1.97E-36 | 520 | 520 |
| LIX1L      | 0.523947945 | 5.31E-38 | 2.03E-36 | 520 | 520 |
| ESAM       | 0.523888423 | 5.43E-38 | 2.07E-36 | 520 | 520 |
| OLR1       | 0.52308308  | 7.34E-38 | 2.80E-36 | 520 | 519 |
| MRC1       | 0.522980262 | 7.63E-38 | 2.90E-36 | 520 | 520 |
| GNA12      | 0.522893134 | 7.88E-38 | 2.99E-36 | 520 | 520 |
| DCLK2      | 0.522835818 | 8.06E-38 | 3.05E-36 | 520 | 519 |
| GUCA1A     | 0.522798596 | 8.17E-38 | 3.09E-36 | 520 | 501 |
| FZD2       | 0.52269567  | 8.49E-38 | 3.21E-36 | 520 | 520 |
| SAMD4A     | 0.522130424 | 1.05E-37 | 3.95E-36 | 520 | 520 |
| SFXN3      | 0.522046238 | 1.08E-37 | 4.07E-36 | 520 | 520 |
| PRR16      | 0.521409277 | 1.37E-37 | 5.16E-36 | 520 | 520 |
| TEK        | 0.521200913 | 1.48E-37 | 5.56E-36 | 520 | 519 |
| RAB23      | 0.521030177 | 1.58E-37 | 5.92E-36 | 520 | 520 |
| TNFSF4     | 0.52092371  | 1.65E-37 | 6.14E-36 | 520 | 520 |
| NRK        | 0.520501512 | 1.92E-37 | 7.17E-36 | 520 | 463 |
| FOXS1      | 0.520384987 | 2.01E-37 | 7.48E-36 | 520 | 519 |
| KCNA6      | 0.518574627 | 3.93E-37 | 1.46E-35 | 520 | 493 |
| SGTB       | 0.518389276 | 4.21E-37 | 1.56E-35 | 520 | 520 |
| ANXA5      | 0.518293901 | 4.36E-37 | 1.61E-35 | 520 | 520 |
| FAM110B    | 0.517595722 | 5.64E-37 | 2.08E-35 | 520 | 519 |
| ADAMTS9    | 0.517347058 | 6.18E-37 | 2.28E-35 | 520 | 520 |

|              |             |          |          |     |     |
|--------------|-------------|----------|----------|-----|-----|
| SALL1        | 0.517145309 | 6.66E-37 | 2.45E-35 | 520 | 494 |
| DLL4         | 0.516737646 | 7.73E-37 | 2.84E-35 | 520 | 520 |
| RHOQ         | 0.516625455 | 8.06E-37 | 2.95E-35 | 520 | 520 |
| MCAM         | 0.516385752 | 8.80E-37 | 3.22E-35 | 520 | 520 |
| SLC39A13     | 0.516125033 | 9.68E-37 | 3.54E-35 | 520 | 520 |
| NOVA2        | 0.516117222 | 9.71E-37 | 3.54E-35 | 520 | 520 |
| CRYGN        | 0.516049895 | 9.95E-37 | 3.62E-35 | 520 | 349 |
| GJC1         | 0.516049084 | 9.95E-37 | 3.62E-35 | 520 | 520 |
| GSC          | 0.516001671 | 1.01E-36 | 3.67E-35 | 520 | 512 |
| IGF2         | 0.5160004   | 1.01E-36 | 3.67E-35 | 520 | 520 |
| MFGE8        | 0.51595668  | 1.03E-36 | 3.72E-35 | 520 | 520 |
| 4-Sep        | 0.51564992  | 1.15E-36 | 4.15E-35 | 520 | 520 |
| LOC100134259 | 0.515071    | 1.42E-36 | 5.12E-35 | 520 | 514 |
| PCDH17       | 0.514394277 | 1.82E-36 | 6.53E-35 | 520 | 520 |
| MEX3B        | 0.514320158 | 1.87E-36 | 6.70E-35 | 520 | 520 |
| GEFT         | 0.514054643 | 2.06E-36 | 7.37E-35 | 520 | 520 |
| PLVAP        | 0.513698515 | 2.35E-36 | 8.37E-35 | 520 | 520 |
| CTSZ         | 0.513691494 | 2.35E-36 | 8.38E-35 | 520 | 520 |
| PABPC5       | 0.513387174 | 2.63E-36 | 9.34E-35 | 520 | 492 |
| ENG          | 0.513281447 | 2.73E-36 | 9.69E-35 | 520 | 520 |
| SLIT3        | 0.513273209 | 2.74E-36 | 9.70E-35 | 520 | 519 |
| CNPY4        | 0.513224886 | 2.79E-36 | 9.86E-35 | 520 | 520 |
| RGS16        | 0.513090293 | 2.93E-36 | 1.03E-34 | 520 | 520 |
| SOBP         | 0.5124817   | 3.65E-36 | 1.29E-34 | 520 | 520 |
| ARSE         | 0.512461717 | 3.67E-36 | 1.29E-34 | 520 | 513 |
| BCAT1        | 0.511950383 | 4.42E-36 | 1.55E-34 | 520 | 520 |
| WIPF1        | 0.511638485 | 4.95E-36 | 1.73E-34 | 520 | 520 |
| ARHGAP29     | 0.5115169   | 5.17E-36 | 1.81E-34 | 520 | 520 |
| SNED1        | 0.510879868 | 6.50E-36 | 2.27E-34 | 520 | 520 |
| MYCT1        | 0.510707117 | 6.92E-36 | 2.41E-34 | 520 | 520 |
| MSR1         | 0.510553364 | 7.31E-36 | 2.55E-34 | 520 | 520 |
| NKD1         | 0.510473469 | 7.53E-36 | 2.62E-34 | 520 | 520 |
| PPFIBP1      | 0.510340458 | 7.90E-36 | 2.74E-34 | 520 | 520 |
| TMEM130      | 0.510321603 | 7.95E-36 | 2.75E-34 | 520 | 505 |
| TMEM169      | 0.510154307 | 8.44E-36 | 2.92E-34 | 520 | 516 |
| PRTG         | 0.509809877 | 9.55E-36 | 3.30E-34 | 520 | 511 |
| PDLIM3       | 0.509163446 | 1.20E-35 | 4.15E-34 | 520 | 520 |
| SCARF1       | 0.508468266 | 1.54E-35 | 5.31E-34 | 520 | 520 |
| COL8A2       | 0.508179873 | 1.71E-35 | 5.88E-34 | 520 | 520 |
| MAN1A1       | 0.507850876 | 1.92E-35 | 6.60E-34 | 520 | 520 |
| CDR2         | 0.507779796 | 1.97E-35 | 6.76E-34 | 520 | 520 |
| PDE7B        | 0.507540736 | 2.15E-35 | 7.35E-34 | 520 | 520 |
| GLIPR1       | 0.507308911 | 2.33E-35 | 7.96E-34 | 520 | 520 |
| FZD1         | 0.507160536 | 2.46E-35 | 8.38E-34 | 520 | 520 |
| ACE          | 0.507039006 | 2.57E-35 | 8.74E-34 | 520 | 520 |
| FAM38B       | 0.506936152 | 2.67E-35 | 9.05E-34 | 520 | 517 |

|          |             |          |          |     |     |
|----------|-------------|----------|----------|-----|-----|
| SUSD5    | 0.506692251 | 2.91E-35 | 9.85E-34 | 520 | 517 |
| LRFN5    | 0.506421504 | 3.20E-35 | 1.08E-33 | 520 | 478 |
| BACH2    | 0.50618972  | 3.47E-35 | 1.17E-33 | 520 | 520 |
| FCGR2A   | 0.505902963 | 3.84E-35 | 1.30E-33 | 520 | 520 |
| SERPINE1 | 0.504563737 | 6.17E-35 | 2.08E-33 | 520 | 520 |
| C11orf41 | 0.503503545 | 8.96E-35 | 3.01E-33 | 520 | 519 |
| TIAM2    | 0.502483569 | 1.28E-34 | 4.30E-33 | 520 | 520 |
| RBM24    | 0.502398381 | 1.32E-34 | 4.42E-33 | 520 | 515 |
| LGALS1   | 0.502256415 | 1.39E-34 | 4.64E-33 | 520 | 520 |
| TCF12    | 0.501836553 | 1.61E-34 | 5.36E-33 | 520 | 520 |
| GEM      | 0.501411338 | 1.86E-34 | 6.20E-33 | 520 | 520 |
| GRAMD1A  | 0.501284731 | 1.95E-34 | 6.47E-33 | 520 | 520 |
| SPRED1   | 0.501215757 | 2.00E-34 | 6.62E-33 | 520 | 520 |
| FAM70B   | 0.501050044 | 2.12E-34 | 6.99E-33 | 520 | 520 |
| DRP2     | 0.50085027  | 2.27E-34 | 7.48E-33 | 520 | 516 |
| MFAP2    | 0.500105182 | 2.94E-34 | 9.68E-33 | 520 | 520 |
| RBM9     | 0.499435895 | 3.71E-34 | 1.22E-32 | 520 | 520 |
| RARRES2  | 0.499095497 | 4.17E-34 | 1.37E-32 | 520 | 520 |
| CDC42EP3 | 0.498856076 | 4.53E-34 | 1.49E-32 | 520 | 520 |
| GRP      | 0.498834758 | 4.56E-34 | 1.49E-32 | 520 | 465 |
| TRIO     | 0.498641837 | 4.88E-34 | 1.59E-32 | 520 | 520 |
| THPO     | 0.498603251 | 4.95E-34 | 1.61E-32 | 520 | 495 |
| TBX15    | 0.498563396 | 5.01E-34 | 1.63E-32 | 520 | 520 |
| CRTAP    | 0.49847369  | 5.17E-34 | 1.68E-32 | 520 | 520 |
| FAM189A1 | 0.497463114 | 7.33E-34 | 2.38E-32 | 520 | 483 |
| PLN      | 0.497012633 | 8.56E-34 | 2.77E-32 | 520 | 512 |
| CALHM2   | 0.497004905 | 8.58E-34 | 2.78E-32 | 520 | 520 |
| FHOD3    | 0.496961961 | 8.71E-34 | 2.81E-32 | 520 | 520 |
| CXorf36  | 0.496891584 | 8.92E-34 | 2.88E-32 | 520 | 520 |
| GNS      | 0.496743704 | 9.39E-34 | 3.02E-32 | 520 | 520 |
| LIMS3    | 0.496490959 | 1.02E-33 | 3.29E-32 | 520 | 493 |
| SCN1B    | 0.496362561 | 1.07E-33 | 3.44E-32 | 520 | 520 |
| ARL4C    | 0.495436286 | 1.47E-33 | 4.70E-32 | 520 | 520 |
| MAP3K12  | 0.495317759 | 1.53E-33 | 4.89E-32 | 520 | 520 |
| CYB5R3   | 0.494869804 | 1.78E-33 | 5.69E-32 | 520 | 520 |
| SMAD7    | 0.494844756 | 1.80E-33 | 5.73E-32 | 520 | 520 |
| TGFBI    | 0.494750354 | 1.86E-33 | 5.91E-32 | 520 | 520 |
| RDH8     | 0.494367476 | 2.12E-33 | 6.72E-32 | 520 | 377 |
| IQSEC1   | 0.49403304  | 2.37E-33 | 7.52E-32 | 520 | 520 |
| PALM2    | 0.493303996 | 3.04E-33 | 9.62E-32 | 520 | 520 |
| COL14A1  | 0.493274931 | 3.07E-33 | 9.70E-32 | 520 | 520 |
| PDE1B    | 0.492931264 | 3.45E-33 | 1.09E-31 | 520 | 520 |
| HTR2A    | 0.492584102 | 3.88E-33 | 1.22E-31 | 520 | 391 |
| MITF     | 0.492321054 | 4.24E-33 | 1.33E-31 | 520 | 520 |
| NCKAP5L  | 0.491985599 | 4.75E-33 | 1.49E-31 | 520 | 520 |
| HNMT     | 0.491380855 | 5.83E-33 | 1.83E-31 | 520 | 520 |

|           |             |          |          |     |     |
|-----------|-------------|----------|----------|-----|-----|
| CDH6      | 0.491315297 | 5.96E-33 | 1.86E-31 | 520 | 518 |
| HSD11B1   | 0.491241071 | 6.11E-33 | 1.91E-31 | 520 | 516 |
| CNN3      | 0.490916338 | 6.82E-33 | 2.12E-31 | 520 | 520 |
| CCBE1     | 0.490913482 | 6.83E-33 | 2.12E-31 | 520 | 509 |
| MYH9      | 0.490724469 | 7.27E-33 | 2.26E-31 | 520 | 520 |
| CSDC2     | 0.490503522 | 7.84E-33 | 2.43E-31 | 520 | 497 |
| ACTN1     | 0.489972492 | 9.37E-33 | 2.90E-31 | 520 | 520 |
| HLX       | 0.489923143 | 9.53E-33 | 2.95E-31 | 520 | 520 |
| HECW2     | 0.489910467 | 9.57E-33 | 2.95E-31 | 520 | 520 |
| RHOBTB3   | 0.489678683 | 1.03E-32 | 3.19E-31 | 520 | 520 |
| TRPC1     | 0.488996176 | 1.30E-32 | 4.00E-31 | 520 | 519 |
| JPH2      | 0.488918094 | 1.33E-32 | 4.10E-31 | 520 | 520 |
| TPM2      | 0.488721397 | 1.43E-32 | 4.37E-31 | 520 | 520 |
| PLOD3     | 0.488644901 | 1.46E-32 | 4.48E-31 | 520 | 520 |
| CD276     | 0.488624948 | 1.47E-32 | 4.50E-31 | 520 | 520 |
| F2RL2     | 0.488398582 | 1.59E-32 | 4.85E-31 | 520 | 520 |
| IL7R      | 0.48785079  | 1.91E-32 | 5.82E-31 | 520 | 519 |
| C5AR1     | 0.487513768 | 2.13E-32 | 6.50E-31 | 520 | 520 |
| OGN       | 0.486744486 | 2.76E-32 | 8.36E-31 | 520 | 488 |
| GPR162    | 0.486187307 | 3.32E-32 | 1.00E-30 | 520 | 520 |
| ROBO4     | 0.48605812  | 3.46E-32 | 1.05E-30 | 520 | 520 |
| FOXC2     | 0.485767413 | 3.81E-32 | 1.15E-30 | 520 | 514 |
| PTX3      | 0.485663206 | 3.95E-32 | 1.19E-30 | 520 | 515 |
| ARHGAP42  | 0.485455274 | 4.23E-32 | 1.27E-30 | 520 | 519 |
| FKBP9L    | 0.48524653  | 4.53E-32 | 1.36E-30 | 520 | 520 |
| IKBIP     | 0.485180376 | 4.63E-32 | 1.39E-30 | 520 | 520 |
| FAM65A    | 0.484734329 | 5.36E-32 | 1.61E-30 | 520 | 520 |
| PDE2A     | 0.484671386 | 5.48E-32 | 1.64E-30 | 520 | 520 |
| C20orf112 | 0.484320775 | 6.15E-32 | 1.84E-30 | 520 | 520 |
| WISP2     | 0.484296883 | 6.20E-32 | 1.85E-30 | 520 | 517 |
| TLL1      | 0.484225024 | 6.35E-32 | 1.89E-30 | 520 | 519 |
| SYTL2     | 0.483527255 | 7.98E-32 | 2.37E-30 | 520 | 520 |
| KERA      | 0.48276264  | 1.03E-31 | 3.05E-30 | 520 | 380 |
| TNC       | 0.482748816 | 1.03E-31 | 3.06E-30 | 520 | 520 |
| SNX9      | 0.482597612 | 1.08E-31 | 3.21E-30 | 520 | 520 |
| DPYSL3    | 0.482547002 | 1.10E-31 | 3.26E-30 | 520 | 520 |
| ZNF385D   | 0.482532845 | 1.11E-31 | 3.27E-30 | 520 | 510 |
| S1PR1     | 0.48230938  | 1.19E-31 | 3.51E-30 | 520 | 520 |
| KIRREL    | 0.482274058 | 1.20E-31 | 3.55E-30 | 520 | 520 |
| GPC4      | 0.482099986 | 1.28E-31 | 3.75E-30 | 520 | 520 |
| SLITRK4   | 0.482092636 | 1.28E-31 | 3.75E-30 | 520 | 477 |
| ANGPT2    | 0.481779334 | 1.42E-31 | 4.15E-30 | 520 | 520 |
| KIF3C     | 0.48166685  | 1.47E-31 | 4.30E-30 | 520 | 520 |
| C14orf49  | 0.481586192 | 1.51E-31 | 4.41E-30 | 520 | 520 |
| FARP1     | 0.481132669 | 1.75E-31 | 5.11E-30 | 520 | 520 |
| CHPF2     | 0.481115142 | 1.76E-31 | 5.13E-30 | 520 | 520 |

|              |             |          |          |     |     |
|--------------|-------------|----------|----------|-----|-----|
| CADPS        | 0.481108214 | 1.76E-31 | 5.13E-30 | 520 | 485 |
| LPAR1        | 0.481057842 | 1.79E-31 | 5.21E-30 | 520 | 520 |
| CHST11       | 0.480322529 | 2.28E-31 | 6.61E-30 | 520 | 520 |
| PDE1A        | 0.480163959 | 2.40E-31 | 6.95E-30 | 520 | 519 |
| RSPO3        | 0.48011575  | 2.44E-31 | 7.05E-30 | 520 | 512 |
| BEND6        | 0.47996041  | 2.56E-31 | 7.41E-30 | 520 | 519 |
| GPX7         | 0.479600267 | 2.88E-31 | 8.31E-30 | 520 | 520 |
| SDC3         | 0.479299486 | 3.18E-31 | 9.14E-30 | 520 | 520 |
| HECW1        | 0.479105352 | 3.38E-31 | 9.72E-30 | 520 | 516 |
| XIRP1        | 0.478836159 | 3.69E-31 | 1.06E-29 | 520 | 518 |
| SCARB2       | 0.47879828  | 3.74E-31 | 1.07E-29 | 520 | 520 |
| P4HA1        | 0.478700965 | 3.86E-31 | 1.10E-29 | 520 | 520 |
| GDPD5        | 0.478482787 | 4.14E-31 | 1.18E-29 | 520 | 520 |
| ARHGAP18     | 0.478470638 | 4.16E-31 | 1.19E-29 | 520 | 520 |
| GDF6         | 0.478277933 | 4.42E-31 | 1.26E-29 | 520 | 493 |
| LIN7A        | 0.478243946 | 4.47E-31 | 1.27E-29 | 520 | 508 |
| CHRNA1       | 0.477613627 | 5.48E-31 | 1.56E-29 | 520 | 506 |
| CNTNAP1      | 0.477510315 | 5.67E-31 | 1.61E-29 | 520 | 520 |
| MEF2C        | 0.477344005 | 5.98E-31 | 1.69E-29 | 520 | 520 |
| ROR1         | 0.477329929 | 6.01E-31 | 1.70E-29 | 520 | 510 |
| RBPM52       | 0.477062456 | 6.55E-31 | 1.85E-29 | 520 | 520 |
| ALDH1L2      | 0.477001321 | 6.68E-31 | 1.88E-29 | 520 | 520 |
| SPARCL1      | 0.475831012 | 9.72E-31 | 2.73E-29 | 520 | 520 |
| SLC16A4      | 0.475160743 | 1.21E-30 | 3.39E-29 | 520 | 519 |
| GOLM1        | 0.47505031  | 1.25E-30 | 3.50E-29 | 520 | 520 |
| GNG11        | 0.474742219 | 1.38E-30 | 3.85E-29 | 520 | 520 |
| SATB2        | 0.474732029 | 1.38E-30 | 3.86E-29 | 520 | 520 |
| IQSEC3       | 0.474612865 | 1.44E-30 | 4.01E-29 | 520 | 507 |
| PRKD1        | 0.474347479 | 1.56E-30 | 4.35E-29 | 520 | 517 |
| FAM155A      | 0.473520088 | 2.03E-30 | 5.65E-29 | 520 | 511 |
| GPR176       | 0.473494266 | 2.05E-30 | 5.69E-29 | 520 | 520 |
| LOC284688    | 0.473436037 | 2.09E-30 | 5.79E-29 | 520 | 308 |
| CREB3L2      | 0.473274948 | 2.20E-30 | 6.08E-29 | 520 | 520 |
| SOAT1        | 0.473064113 | 2.35E-30 | 6.50E-29 | 520 | 520 |
| SMURF2       | 0.472635239 | 2.70E-30 | 7.43E-29 | 520 | 520 |
| LOC100129034 | 0.472254838 | 3.04E-30 | 8.37E-29 | 520 | 520 |
| IGFBP5       | 0.471599284 | 3.74E-30 | 1.03E-28 | 520 | 520 |
| SLAMF8       | 0.471573844 | 3.77E-30 | 1.03E-28 | 520 | 520 |
| GALNT2       | 0.471444467 | 3.93E-30 | 1.08E-28 | 520 | 520 |
| PLOD1        | 0.471207972 | 4.23E-30 | 1.16E-28 | 520 | 520 |
| SOCS5        | 0.470985623 | 4.54E-30 | 1.24E-28 | 520 | 520 |
| BCL6B        | 0.47053712  | 5.23E-30 | 1.43E-28 | 520 | 520 |
| ITGA9        | 0.470347704 | 5.55E-30 | 1.51E-28 | 520 | 519 |
| LIMS1        | 0.47024441  | 5.74E-30 | 1.56E-28 | 520 | 520 |
| C8orf31      | 0.470223873 | 5.78E-30 | 1.57E-28 | 520 | 502 |
| SLC8A1       | 0.470182377 | 5.85E-30 | 1.59E-28 | 520 | 520 |



|            |             |          |          |     |     |
|------------|-------------|----------|----------|-----|-----|
| TRAM2      | 0.470148381 | 5.91E-30 | 1.60E-28 | 520 | 520 |
| VASH2      | 0.469937468 | 6.32E-30 | 1.71E-28 | 520 | 519 |
| ABL1       | 0.469712032 | 6.78E-30 | 1.83E-28 | 520 | 520 |
| KDR        | 0.469683934 | 6.84E-30 | 1.85E-28 | 520 | 520 |
| GLG1       | 0.469559862 | 7.12E-30 | 1.92E-28 | 520 | 520 |
| BHLHE41    | 0.46919642  | 7.98E-30 | 2.14E-28 | 520 | 520 |
| LPL        | 0.468915986 | 8.71E-30 | 2.34E-28 | 520 | 520 |
| IFFO1      | 0.468873263 | 8.83E-30 | 2.37E-28 | 520 | 520 |
| MAP3K3     | 0.468848742 | 8.90E-30 | 2.38E-28 | 520 | 520 |
| C6orf204   | 0.468781231 | 9.09E-30 | 2.43E-28 | 520 | 519 |
| ABCA6      | 0.468695688 | 9.33E-30 | 2.49E-28 | 520 | 519 |
| SULF2      | 0.468314223 | 1.05E-29 | 2.81E-28 | 520 | 520 |
| FAM171B    | 0.468249414 | 1.07E-29 | 2.86E-28 | 520 | 520 |
| NEK6       | 0.46819757  | 1.09E-29 | 2.90E-28 | 520 | 520 |
| DNAJC18    | 0.46812095  | 1.12E-29 | 2.97E-28 | 520 | 520 |
| ARHGAP28   | 0.468119913 | 1.12E-29 | 2.97E-28 | 520 | 520 |
| APBA2      | 0.468046486 | 1.14E-29 | 3.03E-28 | 520 | 520 |
| FAT4       | 0.468045616 | 1.14E-29 | 3.03E-28 | 520 | 519 |
| MAMDC2     | 0.467820132 | 1.23E-29 | 3.24E-28 | 520 | 519 |
| SEMA6B     | 0.467804292 | 1.23E-29 | 3.26E-28 | 520 | 520 |
| TBC1D2B    | 0.467676877 | 1.28E-29 | 3.38E-28 | 520 | 520 |
| TRO        | 0.467674659 | 1.28E-29 | 3.38E-28 | 520 | 520 |
| MOCS1      | 0.467457986 | 1.37E-29 | 3.60E-28 | 520 | 520 |
| PRAF2      | 0.467457897 | 1.37E-29 | 3.60E-28 | 520 | 520 |
| FOXO1      | 0.467225339 | 1.48E-29 | 3.87E-28 | 520 | 520 |
| DENND5A    | 0.467160486 | 1.51E-29 | 3.94E-28 | 520 | 520 |
| CDH13      | 0.467121889 | 1.53E-29 | 3.99E-28 | 520 | 520 |
| MYLK       | 0.466953253 | 1.61E-29 | 4.19E-28 | 520 | 520 |
| DOCK4      | 0.466951588 | 1.61E-29 | 4.19E-28 | 520 | 520 |
| KLHL4      | 0.466865706 | 1.65E-29 | 4.29E-28 | 520 | 486 |
| ZBTB46     | 0.466566808 | 1.81E-29 | 4.70E-28 | 520 | 520 |
| MAPRE2     | 0.46646578  | 1.87E-29 | 4.84E-28 | 520 | 520 |
| ST6GALNAC3 | 0.465138337 | 2.83E-29 | 7.30E-28 | 520 | 519 |
| PCNX       | 0.465104929 | 2.86E-29 | 7.37E-28 | 520 | 520 |
| ADORA1     | 0.465095758 | 2.86E-29 | 7.38E-28 | 520 | 520 |
| CD34       | 0.464960651 | 2.99E-29 | 7.69E-28 | 520 | 520 |
| CLEC5A     | 0.464954028 | 2.99E-29 | 7.69E-28 | 520 | 520 |
| FNDC3A     | 0.46485178  | 3.09E-29 | 7.93E-28 | 520 | 520 |
| CHPF       | 0.464262023 | 3.70E-29 | 9.49E-28 | 520 | 520 |
| PODNL1     | 0.464113732 | 3.88E-29 | 9.92E-28 | 520 | 520 |
| TENC1      | 0.464034612 | 3.97E-29 | 1.02E-27 | 520 | 520 |
| AXIN2      | 0.463665992 | 4.45E-29 | 1.14E-27 | 520 | 520 |
| MAGED2     | 0.463371848 | 4.87E-29 | 1.24E-27 | 520 | 520 |
| SERPINF1   | 0.463363624 | 4.89E-29 | 1.24E-27 | 520 | 520 |
| L3MBTL3    | 0.463357665 | 4.90E-29 | 1.24E-27 | 520 | 520 |
| LRP1       | 0.463147461 | 5.22E-29 | 1.33E-27 | 520 | 520 |

|            |             |          |          |     |     |
|------------|-------------|----------|----------|-----|-----|
| STAC       | 0.463120432 | 5.27E-29 | 1.34E-27 | 520 | 518 |
| SLC1A7     | 0.462830644 | 5.76E-29 | 1.46E-27 | 520 | 451 |
| FKBP9      | 0.462566353 | 6.24E-29 | 1.58E-27 | 520 | 520 |
| FAM131B    | 0.462254306 | 6.87E-29 | 1.74E-27 | 520 | 518 |
| BICD1      | 0.462243003 | 6.89E-29 | 1.74E-27 | 520 | 520 |
| EFHD1      | 0.462001957 | 7.42E-29 | 1.87E-27 | 520 | 520 |
| RASD2      | 0.461971607 | 7.49E-29 | 1.89E-27 | 520 | 520 |
| SCARA5     | 0.461920236 | 7.61E-29 | 1.91E-27 | 520 | 515 |
| BACE1      | 0.461829337 | 7.83E-29 | 1.97E-27 | 520 | 520 |
| SLC39A10   | 0.46171387  | 8.11E-29 | 2.03E-27 | 520 | 520 |
| ZBTB47     | 0.461656426 | 8.25E-29 | 2.07E-27 | 520 | 520 |
| NPTX2      | 0.461567962 | 8.48E-29 | 2.12E-27 | 520 | 519 |
| HRH2       | 0.461545238 | 8.54E-29 | 2.13E-27 | 520 | 513 |
| SUSD2      | 0.46123286  | 9.39E-29 | 2.34E-27 | 520 | 520 |
| FLRT2      | 0.461146938 | 9.64E-29 | 2.40E-27 | 520 | 520 |
| LOC283731  | 0.46112729  | 9.70E-29 | 2.42E-27 | 520 | 412 |
| CD163      | 0.461074274 | 9.86E-29 | 2.45E-27 | 520 | 520 |
| NLGN2      | 0.460937358 | 1.03E-28 | 2.55E-27 | 520 | 520 |
| PRDM8      | 0.460918465 | 1.03E-28 | 2.56E-27 | 520 | 519 |
| ADAMTS15   | 0.460896363 | 1.04E-28 | 2.58E-27 | 520 | 508 |
| CAP2       | 0.460455517 | 1.19E-28 | 2.94E-27 | 520 | 520 |
| TBC1D16    | 0.460330314 | 1.24E-28 | 3.05E-27 | 520 | 520 |
| TMEM233    | 0.46032306  | 1.24E-28 | 3.06E-27 | 520 | 494 |
| NES        | 0.460249589 | 1.27E-28 | 3.12E-27 | 520 | 520 |
| CSGALNACT1 | 0.460091898 | 1.33E-28 | 3.27E-27 | 520 | 520 |
| TNFSF12    | 0.46008666  | 1.33E-28 | 3.27E-27 | 520 | 520 |
| RASGRP3    | 0.459950233 | 1.39E-28 | 3.41E-27 | 520 | 520 |
| PAM        | 0.459782626 | 1.46E-28 | 3.58E-27 | 520 | 520 |
| SALL4      | 0.459626437 | 1.53E-28 | 3.75E-27 | 520 | 512 |
| NETO1      | 0.459329945 | 1.68E-28 | 4.09E-27 | 520 | 453 |
| TFPI       | 0.459258523 | 1.71E-28 | 4.18E-27 | 520 | 520 |
| TRPC3      | 0.459100696 | 1.80E-28 | 4.38E-27 | 520 | 488 |
| ARMCX2     | 0.458862074 | 1.93E-28 | 4.70E-27 | 520 | 520 |
| ITGB5      | 0.458780123 | 1.98E-28 | 4.81E-27 | 520 | 520 |
| MMD        | 0.458722224 | 2.02E-28 | 4.89E-27 | 520 | 520 |
| POFUT2     | 0.458687575 | 2.04E-28 | 4.94E-27 | 520 | 520 |
| MEIS3P1    | 0.458614289 | 2.08E-28 | 5.04E-27 | 520 | 520 |
| ASXL3      | 0.458529931 | 2.14E-28 | 5.17E-27 | 520 | 431 |
| LRCH1      | 0.458306439 | 2.29E-28 | 5.52E-27 | 520 | 520 |
| ITGA4      | 0.458074433 | 2.45E-28 | 5.92E-27 | 520 | 520 |
| SPRY4      | 0.458039415 | 2.48E-28 | 5.97E-27 | 520 | 520 |
| KCTD17     | 0.457775718 | 2.69E-28 | 6.46E-27 | 520 | 520 |
| VCL        | 0.457772817 | 2.69E-28 | 6.46E-27 | 520 | 520 |
| XYLT1      | 0.457650519 | 2.79E-28 | 6.70E-27 | 520 | 520 |
| PTPN9      | 0.457555267 | 2.87E-28 | 6.88E-27 | 520 | 520 |
| RFTN1      | 0.456942429 | 3.45E-28 | 8.27E-27 | 520 | 520 |

|           |             |          |          |     |     |
|-----------|-------------|----------|----------|-----|-----|
| CYGB      | 0.456908141 | 3.49E-28 | 8.35E-27 | 520 | 520 |
| HHIP      | 0.456884073 | 3.51E-28 | 8.40E-27 | 520 | 422 |
| BMPR2     | 0.456529395 | 3.91E-28 | 9.33E-27 | 520 | 520 |
| CDH15     | 0.456394185 | 4.07E-28 | 9.71E-27 | 520 | 513 |
| LYVE1     | 0.455986593 | 4.60E-28 | 1.10E-26 | 520 | 519 |
| S1PR2     | 0.455829325 | 4.83E-28 | 1.15E-26 | 520 | 520 |
| SPRED3    | 0.45558263  | 5.20E-28 | 1.23E-26 | 520 | 455 |
| TGM2      | 0.455451086 | 5.41E-28 | 1.28E-26 | 520 | 520 |
| VSIG4     | 0.45545027  | 5.41E-28 | 1.28E-26 | 520 | 520 |
| CCDC36    | 0.455270205 | 5.71E-28 | 1.35E-26 | 520 | 503 |
| NRXN2     | 0.455208093 | 5.82E-28 | 1.37E-26 | 520 | 520 |
| TBX2      | 0.455112644 | 5.98E-28 | 1.41E-26 | 520 | 520 |
| TRPC4     | 0.45458085  | 7.02E-28 | 1.65E-26 | 520 | 517 |
| LIMS2     | 0.453895695 | 8.61E-28 | 2.03E-26 | 520 | 520 |
| ABL2      | 0.453864332 | 8.69E-28 | 2.04E-26 | 520 | 520 |
| CCDC89    | 0.453548111 | 9.55E-28 | 2.24E-26 | 520 | 506 |
| COL13A1   | 0.453252827 | 1.04E-27 | 2.45E-26 | 520 | 520 |
| SHISA4    | 0.45324318  | 1.05E-27 | 2.45E-26 | 520 | 520 |
| KCNK2     | 0.453101398 | 1.09E-27 | 2.55E-26 | 520 | 494 |
| CCDC46    | 0.453092039 | 1.09E-27 | 2.56E-26 | 520 | 520 |
| NCOR2     | 0.45283601  | 1.18E-27 | 2.76E-26 | 520 | 520 |
| PALLD     | 0.452785218 | 1.20E-27 | 2.80E-26 | 520 | 520 |
| C1S       | 0.45262371  | 1.26E-27 | 2.93E-26 | 520 | 520 |
| TMEM133   | 0.452597355 | 1.27E-27 | 2.95E-26 | 520 | 518 |
| UBTD1     | 0.452255189 | 1.40E-27 | 3.26E-26 | 520 | 520 |
| PLCL1     | 0.452132514 | 1.45E-27 | 3.37E-26 | 520 | 520 |
| ITGAV     | 0.452077456 | 1.48E-27 | 3.43E-26 | 520 | 520 |
| SEPN1     | 0.451950918 | 1.53E-27 | 3.55E-26 | 520 | 520 |
| IGFBP4    | 0.451202082 | 1.92E-27 | 4.43E-26 | 520 | 520 |
| TLN2      | 0.451196989 | 1.92E-27 | 4.43E-26 | 520 | 520 |
| ADC       | 0.451179226 | 1.93E-27 | 4.45E-26 | 520 | 520 |
| PTPRB     | 0.45075086  | 2.19E-27 | 5.04E-26 | 520 | 520 |
| SIGLEC9   | 0.450724806 | 2.21E-27 | 5.08E-26 | 520 | 520 |
| LOX       | 0.450683618 | 2.23E-27 | 5.13E-26 | 520 | 520 |
| APBB1     | 0.450613411 | 2.28E-27 | 5.24E-26 | 520 | 520 |
| TPP1      | 0.450532128 | 2.33E-27 | 5.36E-26 | 520 | 520 |
| ADPRH     | 0.450251196 | 2.54E-27 | 5.81E-26 | 520 | 520 |
| LOC728264 | 0.450062455 | 2.68E-27 | 6.13E-26 | 520 | 520 |
| IGF2AS    | 0.449987876 | 2.74E-27 | 6.26E-26 | 520 | 458 |
| CACNA1G   | 0.449652659 | 3.03E-27 | 6.89E-26 | 520 | 516 |
| MURC      | 0.449513683 | 3.15E-27 | 7.17E-26 | 520 | 520 |
| C5orf46   | 0.449342936 | 3.31E-27 | 7.53E-26 | 520 | 491 |
| NOTCH4    | 0.449341678 | 3.31E-27 | 7.53E-26 | 520 | 520 |
| SORCS2    | 0.449211023 | 3.44E-27 | 7.81E-26 | 520 | 520 |
| EML1      | 0.449035034 | 3.63E-27 | 8.21E-26 | 520 | 520 |
| LBH       | 0.448834217 | 3.85E-27 | 8.70E-26 | 520 | 520 |

|           |             |          |          |     |     |
|-----------|-------------|----------|----------|-----|-----|
| TM4SF18   | 0.448685393 | 4.02E-27 | 9.08E-26 | 520 | 520 |
| PHC2      | 0.448649547 | 4.06E-27 | 9.16E-26 | 520 | 520 |
| GRIA3     | 0.448414854 | 4.35E-27 | 9.79E-26 | 520 | 511 |
| ZNF660    | 0.44836094  | 4.42E-27 | 9.94E-26 | 520 | 459 |
| SLIT2     | 0.448312474 | 4.48E-27 | 1.01E-25 | 520 | 515 |
| FPR3      | 0.448185292 | 4.65E-27 | 1.04E-25 | 520 | 520 |
| CHRM4     | 0.448076047 | 4.80E-27 | 1.08E-25 | 520 | 482 |
| PTGIS     | 0.44788542  | 5.08E-27 | 1.14E-25 | 520 | 517 |
| LIF       | 0.447793726 | 5.22E-27 | 1.17E-25 | 520 | 520 |
| RARA      | 0.447787672 | 5.23E-27 | 1.17E-25 | 520 | 520 |
| SEMA3C    | 0.447770469 | 5.25E-27 | 1.17E-25 | 520 | 520 |
| KIAA0754  | 0.447462412 | 5.75E-27 | 1.28E-25 | 520 | 519 |
| TLN1      | 0.447100615 | 6.39E-27 | 1.42E-25 | 520 | 520 |
| TPST1     | 0.447064283 | 6.46E-27 | 1.43E-25 | 520 | 520 |
| SOD3      | 0.4467764   | 7.02E-27 | 1.56E-25 | 520 | 520 |
| KCNJ6     | 0.446747373 | 7.08E-27 | 1.57E-25 | 520 | 376 |
| CASC4     | 0.445861083 | 9.16E-27 | 2.03E-25 | 520 | 520 |
| VAT1L     | 0.445821005 | 9.27E-27 | 2.05E-25 | 520 | 503 |
| LOC646999 | 0.445782026 | 9.38E-27 | 2.07E-25 | 520 | 516 |
| MAP6      | 0.445726721 | 9.53E-27 | 2.10E-25 | 520 | 517 |
| SERPINA5  | 0.445673162 | 9.68E-27 | 2.13E-25 | 520 | 495 |
| LOC441204 | 0.445468457 | 1.03E-26 | 2.26E-25 | 520 | 492 |
| LARP6     | 0.445241369 | 1.10E-26 | 2.41E-25 | 520 | 520 |
| DRAM1     | 0.445197081 | 1.11E-26 | 2.44E-25 | 520 | 520 |
| CUBN      | 0.444995137 | 1.18E-26 | 2.58E-25 | 520 | 520 |
| TRPV2     | 0.444784745 | 1.25E-26 | 2.74E-25 | 520 | 520 |
| PRICKLE2  | 0.444555071 | 1.34E-26 | 2.92E-25 | 520 | 520 |
| BEST1     | 0.44433735  | 1.42E-26 | 3.11E-25 | 520 | 520 |
| AP2B1     | 0.44415017  | 1.50E-26 | 3.28E-25 | 520 | 520 |
| BHMT2     | 0.443995771 | 1.57E-26 | 3.42E-25 | 520 | 507 |
| PDE1C     | 0.443972292 | 1.58E-26 | 3.44E-25 | 520 | 489 |
| FTO       | 0.443937387 | 1.60E-26 | 3.48E-25 | 520 | 520 |
| C1QTNF7   | 0.443256105 | 1.95E-26 | 4.23E-25 | 520 | 495 |
| CLIP2     | 0.443211483 | 1.97E-26 | 4.28E-25 | 520 | 520 |
| FRMD5     | 0.442901644 | 2.16E-26 | 4.67E-25 | 520 | 508 |
| ARMCX1    | 0.442816174 | 2.21E-26 | 4.78E-25 | 520 | 520 |
| TRIM61    | 0.442433574 | 2.47E-26 | 5.33E-25 | 520 | 430 |
| C18orf1   | 0.441858208 | 2.91E-26 | 6.28E-25 | 520 | 520 |
| COMP      | 0.441836138 | 2.93E-26 | 6.31E-25 | 520 | 518 |
| CYTSB     | 0.441596962 | 3.13E-26 | 6.75E-25 | 520 | 520 |
| KLF9      | 0.441546271 | 3.18E-26 | 6.84E-25 | 520 | 520 |
| GPR85     | 0.441151456 | 3.56E-26 | 7.65E-25 | 520 | 518 |
| PDE4DIP   | 0.440983106 | 3.74E-26 | 8.02E-25 | 520 | 520 |
| C7orf58   | 0.440802598 | 3.93E-26 | 8.43E-25 | 520 | 518 |
| ATXN1     | 0.440775655 | 3.96E-26 | 8.49E-25 | 520 | 520 |
| NEXN      | 0.440717234 | 4.03E-26 | 8.62E-25 | 520 | 520 |

|          |             |          |          |     |     |
|----------|-------------|----------|----------|-----|-----|
| HABP4    | 0.440600776 | 4.17E-26 | 8.90E-25 | 520 | 520 |
| MAGED4B  | 0.440206679 | 4.66E-26 | 9.95E-25 | 520 | 520 |
| NCAM1    | 0.440159114 | 4.73E-26 | 1.01E-24 | 520 | 520 |
| ASAP1    | 0.440053356 | 4.87E-26 | 1.04E-24 | 520 | 520 |
| GLB1     | 0.439971629 | 4.99E-26 | 1.06E-24 | 520 | 520 |
| SERPING1 | 0.439526247 | 5.66E-26 | 1.20E-24 | 520 | 520 |
| TBC1D1   | 0.439436458 | 5.81E-26 | 1.23E-24 | 520 | 520 |
| C1QTNF3  | 0.439336333 | 5.97E-26 | 1.27E-24 | 520 | 520 |
| MMP19    | 0.43927596  | 6.08E-26 | 1.29E-24 | 520 | 520 |
| KATNAL1  | 0.439135121 | 6.33E-26 | 1.34E-24 | 520 | 520 |
| MMP7     | 0.438643011 | 7.27E-26 | 1.54E-24 | 520 | 517 |
| CNTN4    | 0.438609053 | 7.34E-26 | 1.55E-24 | 520 | 502 |
| AVPR1A   | 0.43854063  | 7.49E-26 | 1.58E-24 | 520 | 509 |
| GPM6B    | 0.438315995 | 7.98E-26 | 1.68E-24 | 520 | 520 |
| SULT1C4  | 0.438312779 | 7.99E-26 | 1.68E-24 | 520 | 499 |
| CAMK2A   | 0.43822101  | 8.20E-26 | 1.72E-24 | 520 | 516 |
| WWC2     | 0.438162166 | 8.34E-26 | 1.75E-24 | 520 | 520 |
| DKK2     | 0.438149142 | 8.37E-26 | 1.75E-24 | 520 | 515 |
| LIPA     | 0.43793915  | 8.88E-26 | 1.86E-24 | 520 | 520 |
| PURG     | 0.437627144 | 9.70E-26 | 2.02E-24 | 520 | 434 |
| SLC46A3  | 0.437492024 | 1.01E-25 | 2.10E-24 | 520 | 520 |
| ENPP2    | 0.437085177 | 1.13E-25 | 2.35E-24 | 520 | 520 |
| RGS3     | 0.436969432 | 1.17E-25 | 2.43E-24 | 520 | 520 |
| EPYC     | 0.436765814 | 1.24E-25 | 2.57E-24 | 520 | 406 |
| SEMA5A   | 0.436671796 | 1.27E-25 | 2.64E-24 | 520 | 520 |
| ZBTB10   | 0.436573976 | 1.31E-25 | 2.71E-24 | 520 | 520 |
| ISM1     | 0.436463504 | 1.35E-25 | 2.79E-24 | 520 | 520 |
| PRR5L    | 0.436453946 | 1.35E-25 | 2.80E-24 | 520 | 520 |
| ADRA2A   | 0.436301896 | 1.41E-25 | 2.91E-24 | 520 | 514 |
| CSF1R    | 0.436267998 | 1.42E-25 | 2.94E-24 | 520 | 520 |
| MEOX2    | 0.435856419 | 1.60E-25 | 3.29E-24 | 520 | 506 |
| ABCB4    | 0.435629514 | 1.70E-25 | 3.51E-24 | 520 | 520 |
| FGF7     | 0.435067336 | 1.99E-25 | 4.10E-24 | 520 | 519 |
| THBS3    | 0.434913095 | 2.08E-25 | 4.28E-24 | 520 | 520 |
| ZNF608   | 0.434780439 | 2.16E-25 | 4.43E-24 | 520 | 520 |
| LAMA1    | 0.434680779 | 2.22E-25 | 4.55E-24 | 520 | 519 |
| MS4A4A   | 0.434491407 | 2.34E-25 | 4.79E-24 | 520 | 520 |
| PLEKHO2  | 0.434007145 | 2.68E-25 | 5.47E-24 | 520 | 520 |
| NEDD9    | 0.43383822  | 2.81E-25 | 5.73E-24 | 520 | 520 |
| GLT25D1  | 0.433741257 | 2.89E-25 | 5.88E-24 | 520 | 520 |
| TBX3     | 0.433592912 | 3.01E-25 | 6.12E-24 | 520 | 520 |
| FLI1     | 0.433543114 | 3.05E-25 | 6.20E-24 | 520 | 520 |
| FAM13C   | 0.433486905 | 3.10E-25 | 6.30E-24 | 520 | 512 |
| OR51E1   | 0.433438561 | 3.14E-25 | 6.37E-24 | 520 | 518 |
| PCDHGB6  | 0.433387117 | 3.19E-25 | 6.46E-24 | 520 | 511 |
| MGP      | 0.433359208 | 3.21E-25 | 6.50E-24 | 520 | 520 |

|           |             |          |          |     |     |
|-----------|-------------|----------|----------|-----|-----|
| STON1     | 0.433225063 | 3.33E-25 | 6.74E-24 | 520 | 520 |
| APLNR     | 0.433198736 | 3.36E-25 | 6.79E-24 | 520 | 520 |
| ADAMTS3   | 0.433149707 | 3.41E-25 | 6.87E-24 | 520 | 518 |
| ANGPTL1   | 0.433126484 | 3.43E-25 | 6.91E-24 | 520 | 507 |
| NXPH3     | 0.43298973  | 3.56E-25 | 7.17E-24 | 520 | 518 |
| SIDT2     | 0.432958126 | 3.59E-25 | 7.23E-24 | 520 | 520 |
| KIAA1210  | 0.432892423 | 3.66E-25 | 7.35E-24 | 520 | 310 |
| RASL10B   | 0.432536249 | 4.04E-25 | 8.11E-24 | 520 | 519 |
| PAG1      | 0.432447109 | 4.14E-25 | 8.31E-24 | 520 | 520 |
| TECTA     | 0.432342746 | 4.26E-25 | 8.54E-24 | 520 | 513 |
| TSPAN11   | 0.432290563 | 4.32E-25 | 8.66E-24 | 520 | 520 |
| RFX8      | 0.432219424 | 4.41E-25 | 8.82E-24 | 520 | 507 |
| PLA2G5    | 0.432100744 | 4.56E-25 | 9.10E-24 | 520 | 503 |
| RAPGEF2   | 0.432033138 | 4.64E-25 | 9.26E-24 | 520 | 520 |
| THSD7A    | 0.431722847 | 5.06E-25 | 1.01E-23 | 520 | 514 |
| PTGIR     | 0.431705607 | 5.09E-25 | 1.01E-23 | 520 | 520 |
| RPS6KA2   | 0.431626187 | 5.20E-25 | 1.03E-23 | 520 | 520 |
| EXTL2     | 0.43135902  | 5.60E-25 | 1.11E-23 | 520 | 520 |
| LOC283867 | 0.431167963 | 5.90E-25 | 1.17E-23 | 520 | 363 |
| CCDC88A   | 0.431081345 | 6.05E-25 | 1.20E-23 | 520 | 520 |
| MSX2      | 0.430884218 | 6.38E-25 | 1.26E-23 | 520 | 520 |
| C13orf18  | 0.430546492 | 7.01E-25 | 1.39E-23 | 520 | 520 |
| SLC7A7    | 0.430410845 | 7.28E-25 | 1.44E-23 | 520 | 520 |
| ROS1      | 0.430354437 | 7.39E-25 | 1.46E-23 | 520 | 477 |
| PHLPP2    | 0.429851554 | 8.49E-25 | 1.67E-23 | 520 | 520 |
| FILIP1    | 0.429302905 | 9.87E-25 | 1.95E-23 | 520 | 518 |
| ANK2      | 0.429223812 | 1.01E-24 | 1.99E-23 | 520 | 520 |
| SACS      | 0.429069992 | 1.05E-24 | 2.07E-23 | 520 | 520 |
| CTNNB1    | 0.428877786 | 1.11E-24 | 2.18E-23 | 520 | 520 |
| UGGT2     | 0.428624643 | 1.19E-24 | 2.34E-23 | 520 | 520 |
| EID1      | 0.428368555 | 1.28E-24 | 2.50E-23 | 520 | 520 |
| TMEM106A  | 0.427936366 | 1.44E-24 | 2.81E-23 | 520 | 520 |
| KCNF1     | 0.427891641 | 1.45E-24 | 2.85E-23 | 520 | 509 |
| ROR2      | 0.427823736 | 1.48E-24 | 2.90E-23 | 520 | 520 |
| PCDHGA3   | 0.427654658 | 1.55E-24 | 3.03E-23 | 520 | 495 |
| LHX8      | 0.427648053 | 1.55E-24 | 3.03E-23 | 520 | 499 |
| KCNMB1    | 0.427354849 | 1.68E-24 | 3.28E-23 | 520 | 520 |
| SIRPB1    | 0.426968733 | 1.87E-24 | 3.64E-23 | 520 | 519 |
| INS-IGF2  | 0.426954299 | 1.88E-24 | 3.65E-23 | 520 | 329 |
| FGF14     | 0.426806588 | 1.96E-24 | 3.79E-23 | 520 | 514 |
| KCNT2     | 0.426743979 | 1.99E-24 | 3.86E-23 | 520 | 496 |
| TNFRSF19  | 0.426360773 | 2.21E-24 | 4.28E-23 | 520 | 520 |
| RAPGEF1   | 0.426251219 | 2.27E-24 | 4.40E-23 | 520 | 520 |
| ETV1      | 0.426213586 | 2.30E-24 | 4.44E-23 | 520 | 520 |
| CADM3     | 0.426119588 | 2.36E-24 | 4.55E-23 | 520 | 517 |
| FAM114A1  | 0.425785079 | 2.58E-24 | 4.98E-23 | 520 | 520 |

|           |             |          |          |     |     |
|-----------|-------------|----------|----------|-----|-----|
| CD300C    | 0.425568531 | 2.74E-24 | 5.27E-23 | 520 | 520 |
| PCDH9     | 0.425495254 | 2.79E-24 | 5.37E-23 | 520 | 501 |
| LCA5      | 0.425434995 | 2.84E-24 | 5.45E-23 | 520 | 518 |
| OPRL1     | 0.425287319 | 2.96E-24 | 5.67E-23 | 520 | 520 |
| ERLEC1    | 0.425246736 | 2.99E-24 | 5.73E-23 | 520 | 520 |
| KIAA1614  | 0.425164772 | 3.06E-24 | 5.85E-23 | 520 | 520 |
| APP       | 0.425018683 | 3.18E-24 | 6.08E-23 | 520 | 520 |
| SLC15A4   | 0.424816283 | 3.36E-24 | 6.41E-23 | 520 | 520 |
| ZNF281    | 0.424742042 | 3.43E-24 | 6.53E-23 | 520 | 520 |
| FLNA      | 0.424510595 | 3.65E-24 | 6.94E-23 | 520 | 520 |
| TCP11L1   | 0.42427883  | 3.88E-24 | 7.38E-23 | 520 | 520 |
| PDE4B     | 0.424270052 | 3.89E-24 | 7.39E-23 | 520 | 520 |
| GAP43     | 0.42426662  | 3.90E-24 | 7.39E-23 | 520 | 508 |
| SLC16A2   | 0.424110374 | 4.06E-24 | 7.70E-23 | 520 | 520 |
| TGOLN2    | 0.424084269 | 4.09E-24 | 7.74E-23 | 520 | 520 |
| NFATC2    | 0.424004542 | 4.18E-24 | 7.90E-23 | 520 | 507 |
| PCDHGA11  | 0.423835127 | 4.38E-24 | 8.27E-23 | 520 | 513 |
| KIF7      | 0.423772045 | 4.45E-24 | 8.40E-23 | 520 | 520 |
| FOLR2     | 0.423596225 | 4.67E-24 | 8.80E-23 | 520 | 520 |
| C8orf48   | 0.423572505 | 4.70E-24 | 8.85E-23 | 520 | 506 |
| KLHL38    | 0.423517259 | 4.77E-24 | 8.97E-23 | 520 | 441 |
| CSF1      | 0.423447568 | 4.86E-24 | 9.13E-23 | 520 | 520 |
| EPB41L2   | 0.423275084 | 5.09E-24 | 9.56E-23 | 520 | 520 |
| AP1S2     | 0.423259557 | 5.11E-24 | 9.59E-23 | 520 | 520 |
| PDGFD     | 0.423164188 | 5.25E-24 | 9.83E-23 | 520 | 520 |
| PTPRK     | 0.423007856 | 5.47E-24 | 1.02E-22 | 520 | 520 |
| APOLD1    | 0.422969909 | 5.53E-24 | 1.03E-22 | 520 | 520 |
| ZNF704    | 0.42286714  | 5.68E-24 | 1.06E-22 | 520 | 516 |
| SLC43A1   | 0.422686013 | 5.97E-24 | 1.11E-22 | 520 | 520 |
| BVES      | 0.422602735 | 6.10E-24 | 1.14E-22 | 520 | 520 |
| DIP2C     | 0.422548629 | 6.19E-24 | 1.15E-22 | 520 | 520 |
| GATA6     | 0.422363838 | 6.51E-24 | 1.21E-22 | 520 | 520 |
| SYPL2     | 0.422344954 | 6.54E-24 | 1.22E-22 | 520 | 513 |
| CDYL2     | 0.422208962 | 6.78E-24 | 1.26E-22 | 520 | 518 |
| DENND5B   | 0.422110067 | 6.97E-24 | 1.29E-22 | 520 | 520 |
| SNAI2     | 0.422006193 | 7.16E-24 | 1.33E-22 | 520 | 520 |
| ADAMTS1   | 0.421981293 | 7.21E-24 | 1.34E-22 | 520 | 520 |
| PCDHGA2   | 0.421893436 | 7.38E-24 | 1.37E-22 | 520 | 504 |
| GPR133    | 0.421808596 | 7.55E-24 | 1.40E-22 | 520 | 517 |
| NT5E      | 0.421740675 | 7.69E-24 | 1.42E-22 | 520 | 520 |
| ENTPD1    | 0.421676544 | 7.82E-24 | 1.44E-22 | 520 | 520 |
| POM121L9P | 0.42144828  | 8.32E-24 | 1.53E-22 | 520 | 511 |
| HDX       | 0.421350609 | 8.54E-24 | 1.57E-22 | 520 | 514 |
| PLXNA4    | 0.421271446 | 8.72E-24 | 1.60E-22 | 520 | 518 |
| KIAA0427  | 0.421269099 | 8.73E-24 | 1.60E-22 | 520 | 520 |
| ARHGEF6   | 0.420904232 | 9.62E-24 | 1.76E-22 | 520 | 520 |

|          |             |          |          |     |     |
|----------|-------------|----------|----------|-----|-----|
| BRSK1    | 0.420814539 | 9.85E-24 | 1.80E-22 | 520 | 520 |
| TM6SF1   | 0.420781105 | 9.94E-24 | 1.82E-22 | 520 | 520 |
| SLC22A17 | 0.420531471 | 1.06E-23 | 1.94E-22 | 520 | 520 |
| SPRY1    | 0.420447562 | 1.09E-23 | 1.98E-22 | 520 | 520 |
| SLC45A3  | 0.420377178 | 1.11E-23 | 2.02E-22 | 520 | 520 |
| HSPA13   | 0.420347372 | 1.12E-23 | 2.03E-22 | 520 | 520 |
| PRKCDBP  | 0.420081849 | 1.20E-23 | 2.18E-22 | 520 | 520 |
| CMKLR1   | 0.419630541 | 1.35E-23 | 2.45E-22 | 520 | 520 |
| JAK1     | 0.419478545 | 1.41E-23 | 2.55E-22 | 520 | 520 |
| ZNF275   | 0.419261525 | 1.49E-23 | 2.70E-22 | 520 | 520 |
| KIAA1644 | 0.419103743 | 1.55E-23 | 2.81E-22 | 520 | 520 |
| FUT4     | 0.419095315 | 1.56E-23 | 2.82E-22 | 520 | 520 |
| ARHGEF15 | 0.419066255 | 1.57E-23 | 2.84E-22 | 520 | 520 |
| C1R      | 0.418769201 | 1.70E-23 | 3.06E-22 | 520 | 520 |
| SEMA5B   | 0.418685838 | 1.74E-23 | 3.13E-22 | 520 | 519 |
| SORBS1   | 0.41842753  | 1.86E-23 | 3.35E-22 | 520 | 519 |
| HYAL2    | 0.418393431 | 1.88E-23 | 3.38E-22 | 520 | 520 |
| DCBLD2   | 0.418370568 | 1.89E-23 | 3.39E-22 | 520 | 520 |
| PCDHGB7  | 0.41804151  | 2.06E-23 | 3.70E-22 | 520 | 518 |
| AMIGO2   | 0.418003023 | 2.08E-23 | 3.73E-22 | 520 | 520 |
| FGF16    | 0.41785423  | 2.17E-23 | 3.88E-22 | 520 | 148 |
| SEMA3D   | 0.417005335 | 2.71E-23 | 4.85E-22 | 520 | 513 |
| RNF180   | 0.416831983 | 2.84E-23 | 5.07E-22 | 520 | 518 |
| SH3RF1   | 0.416719996 | 2.92E-23 | 5.22E-22 | 520 | 520 |
| FGFRL1   | 0.416645058 | 2.98E-23 | 5.32E-22 | 520 | 520 |
| TMEM59L  | 0.416431885 | 3.15E-23 | 5.62E-22 | 520 | 503 |
| QKI      | 0.416306433 | 3.26E-23 | 5.80E-22 | 520 | 520 |
| SLCO2B1  | 0.416125705 | 3.42E-23 | 6.07E-22 | 520 | 520 |
| RHOBTB2  | 0.416078275 | 3.46E-23 | 6.14E-22 | 520 | 520 |
| SHISA2   | 0.416018057 | 3.51E-23 | 6.24E-22 | 520 | 519 |
| FLNC     | 0.415741323 | 3.78E-23 | 6.70E-22 | 520 | 520 |
| PLEKHG2  | 0.415646267 | 3.87E-23 | 6.87E-22 | 520 | 520 |
| SMARCA1  | 0.415589401 | 3.93E-23 | 6.96E-22 | 520 | 520 |
| SPATS2L  | 0.41513802  | 4.43E-23 | 7.82E-22 | 520 | 520 |
| NLRP12   | 0.415017085 | 4.57E-23 | 8.07E-22 | 520 | 492 |
| HEY2     | 0.414876806 | 4.74E-23 | 8.36E-22 | 520 | 520 |
| C3AR1    | 0.41468774  | 4.98E-23 | 8.77E-22 | 520 | 520 |
| QPCT     | 0.414576072 | 5.13E-23 | 9.03E-22 | 520 | 520 |
| SCT      | 0.414418865 | 5.35E-23 | 9.40E-22 | 520 | 488 |
| TMCO3    | 0.414289355 | 5.53E-23 | 9.71E-22 | 520 | 520 |
| KIAA1949 | 0.41428695  | 5.53E-23 | 9.71E-22 | 520 | 520 |
| GLT8D1   | 0.414098947 | 5.81E-23 | 1.02E-21 | 520 | 520 |
| KCNN2    | 0.414075407 | 5.85E-23 | 1.02E-21 | 520 | 515 |
| EMILIN2  | 0.413993081 | 5.97E-23 | 1.05E-21 | 520 | 520 |
| FHL5     | 0.413487911 | 6.82E-23 | 1.19E-21 | 520 | 503 |
| EFEMP1   | 0.413382007 | 7.01E-23 | 1.22E-21 | 520 | 520 |



|           |             |          |          |     |     |
|-----------|-------------|----------|----------|-----|-----|
| FHL1      | 0.413310745 | 7.14E-23 | 1.25E-21 | 520 | 520 |
| SIRPB2    | 0.413286356 | 7.18E-23 | 1.25E-21 | 520 | 518 |
| FAM180A   | 0.41315305  | 7.44E-23 | 1.30E-21 | 520 | 513 |
| GNG2      | 0.413027418 | 7.68E-23 | 1.34E-21 | 520 | 520 |
| PLAUR     | 0.412923166 | 7.90E-23 | 1.37E-21 | 520 | 520 |
| PLAU      | 0.412829146 | 8.09E-23 | 1.40E-21 | 520 | 520 |
| ACSL4     | 0.4125438   | 8.71E-23 | 1.51E-21 | 520 | 520 |
| HGF       | 0.412230636 | 9.45E-23 | 1.64E-21 | 520 | 513 |
| CTSO      | 0.412007188 | 1.00E-22 | 1.73E-21 | 520 | 520 |
| DTNA      | 0.411934256 | 1.02E-22 | 1.76E-21 | 520 | 519 |
| CYP2U1    | 0.411877807 | 1.04E-22 | 1.79E-21 | 520 | 520 |
| LTBP3     | 0.411870819 | 1.04E-22 | 1.79E-21 | 520 | 520 |
| BASP1     | 0.411623929 | 1.11E-22 | 1.91E-21 | 520 | 520 |
| SNPH      | 0.411599747 | 1.11E-22 | 1.92E-21 | 520 | 520 |
| OIT3      | 0.41139713  | 1.17E-22 | 2.02E-21 | 520 | 483 |
| PLA2G15   | 0.411351366 | 1.19E-22 | 2.04E-21 | 520 | 520 |
| ABI3BP    | 0.411180046 | 1.24E-22 | 2.13E-21 | 520 | 518 |
| LINGO1    | 0.411100874 | 1.27E-22 | 2.17E-21 | 520 | 520 |
| LOC644538 | 0.411079153 | 1.27E-22 | 2.18E-21 | 520 | 520 |
| CAMK1G    | 0.410593402 | 1.44E-22 | 2.47E-21 | 520 | 514 |
| MEF2D     | 0.410089326 | 1.64E-22 | 2.81E-21 | 520 | 520 |
| HSPA12A   | 0.409987278 | 1.69E-22 | 2.89E-21 | 520 | 520 |
| BAI3      | 0.409677141 | 1.83E-22 | 3.12E-21 | 520 | 451 |
| MMP23B    | 0.409635817 | 1.85E-22 | 3.15E-21 | 520 | 520 |
| DPYSL2    | 0.40963073  | 1.85E-22 | 3.15E-21 | 520 | 520 |
| FOXL1     | 0.409313046 | 2.01E-22 | 3.42E-21 | 520 | 520 |
| MCFD2     | 0.409130396 | 2.11E-22 | 3.58E-21 | 520 | 520 |
| BFAR      | 0.409017168 | 2.17E-22 | 3.68E-21 | 520 | 520 |
| CD99L2    | 0.40895993  | 2.20E-22 | 3.73E-21 | 520 | 520 |
| UBE2QL1   | 0.408729647 | 2.33E-22 | 3.95E-21 | 520 | 520 |
| CYBRD1    | 0.408454092 | 2.50E-22 | 4.23E-21 | 520 | 520 |
| TXNDC15   | 0.408433693 | 2.52E-22 | 4.25E-21 | 520 | 520 |
| TEAD1     | 0.408426146 | 2.52E-22 | 4.26E-21 | 520 | 520 |
| RAB8B     | 0.408396613 | 2.54E-22 | 4.29E-21 | 520 | 520 |
| MXRA7     | 0.408351452 | 2.57E-22 | 4.33E-21 | 520 | 520 |
| RASSF4    | 0.407886547 | 2.90E-22 | 4.86E-21 | 520 | 520 |
| WNT5B     | 0.407855843 | 2.92E-22 | 4.90E-21 | 520 | 520 |
| HSPB7     | 0.407816687 | 2.95E-22 | 4.94E-21 | 520 | 517 |
| PEG3      | 0.407811361 | 2.95E-22 | 4.94E-21 | 520 | 511 |
| PEAR1     | 0.407743717 | 3.00E-22 | 5.03E-21 | 520 | 520 |
| IGSF21    | 0.407481602 | 3.21E-22 | 5.37E-21 | 520 | 517 |
| TSPYL4    | 0.407355858 | 3.32E-22 | 5.54E-21 | 520 | 520 |
| IGF1      | 0.406612006 | 4.01E-22 | 6.68E-21 | 520 | 519 |
| FUT11     | 0.406521933 | 4.10E-22 | 6.83E-21 | 520 | 520 |
| ITGA8     | 0.406516759 | 4.11E-22 | 6.84E-21 | 520 | 500 |
| PEA15     | 0.406369808 | 4.27E-22 | 7.09E-21 | 520 | 520 |

|          |             |          |          |     |     |
|----------|-------------|----------|----------|-----|-----|
| ADRA1B   | 0.406316074 | 4.32E-22 | 7.18E-21 | 520 | 494 |
| SLC11A1  | 0.406241843 | 4.41E-22 | 7.31E-21 | 520 | 520 |
| RASGRP4  | 0.406117272 | 4.55E-22 | 7.54E-21 | 520 | 520 |
| SEC31A   | 0.406013247 | 4.67E-22 | 7.74E-21 | 520 | 520 |
| CYTL1    | 0.405868441 | 4.85E-22 | 8.02E-21 | 520 | 519 |
| KCNJ5    | 0.405780459 | 4.95E-22 | 8.19E-21 | 520 | 518 |
| MRO      | 0.405778473 | 4.96E-22 | 8.19E-21 | 520 | 501 |
| FAM168A  | 0.405515448 | 5.30E-22 | 8.74E-21 | 520 | 520 |
| PDPN     | 0.405190677 | 5.75E-22 | 9.48E-21 | 520 | 520 |
| PCDHGA9  | 0.404753298 | 6.43E-22 | 1.06E-20 | 520 | 510 |
| TMEM184B | 0.40473257  | 6.46E-22 | 1.06E-20 | 520 | 520 |
| GJA5     | 0.404477308 | 6.89E-22 | 1.13E-20 | 520 | 520 |
| GLIPR2   | 0.40437014  | 7.08E-22 | 1.16E-20 | 520 | 520 |
| PCDHGA4  | 0.404271333 | 7.26E-22 | 1.19E-20 | 520 | 507 |
| STC1     | 0.404078087 | 7.63E-22 | 1.25E-20 | 520 | 520 |
| ZFP92    | 0.403976948 | 7.82E-22 | 1.28E-20 | 520 | 471 |
| TM7SF4   | 0.40392997  | 7.92E-22 | 1.29E-20 | 520 | 464 |
| PTGFR    | 0.403872765 | 8.03E-22 | 1.31E-20 | 520 | 517 |
| SLC29A3  | 0.403807741 | 8.16E-22 | 1.33E-20 | 520 | 520 |
| ZNF826   | 0.403804205 | 8.17E-22 | 1.33E-20 | 520 | 499 |
| ARF4     | 0.403705069 | 8.38E-22 | 1.37E-20 | 520 | 520 |
| PRPH2    | 0.403517009 | 8.79E-22 | 1.43E-20 | 520 | 513 |
| ZNF699   | 0.403508893 | 8.80E-22 | 1.43E-20 | 520 | 518 |
| EXT2     | 0.403208589 | 9.50E-22 | 1.54E-20 | 520 | 520 |
| CNTN3    | 0.403176436 | 9.57E-22 | 1.55E-20 | 520 | 445 |
| GLI3     | 0.403098789 | 9.76E-22 | 1.58E-20 | 520 | 520 |
| PCGF2    | 0.403027922 | 9.94E-22 | 1.61E-20 | 520 | 520 |
| ZNF135   | 0.403016256 | 9.97E-22 | 1.61E-20 | 520 | 516 |
| COL16A1  | 0.402973043 | 1.01E-21 | 1.63E-20 | 520 | 520 |
| ZNF486   | 0.402657721 | 1.09E-21 | 1.76E-20 | 520 | 504 |
| JAZF1    | 0.402652824 | 1.09E-21 | 1.76E-20 | 520 | 520 |
| LGR5     | 0.402505927 | 1.13E-21 | 1.82E-20 | 520 | 511 |
| ATP1B4   | 0.402490453 | 1.14E-21 | 1.83E-20 | 520 | 299 |
| EMP3     | 0.40225907  | 1.21E-21 | 1.94E-20 | 520 | 520 |
| C3orf64  | 0.402249301 | 1.21E-21 | 1.94E-20 | 520 | 520 |
| ATP8A2   | 0.402194097 | 1.23E-21 | 1.97E-20 | 520 | 501 |
| NR2F2    | 0.401912668 | 1.32E-21 | 2.11E-20 | 520 | 520 |
| STK10    | 0.401773475 | 1.36E-21 | 2.18E-20 | 520 | 520 |
| UBR1     | 0.401696042 | 1.39E-21 | 2.22E-20 | 520 | 520 |
| SLC17A5  | 0.401653729 | 1.40E-21 | 2.24E-20 | 520 | 520 |
| EGFLAM   | 0.401517806 | 1.45E-21 | 2.32E-20 | 520 | 520 |
| PCDHB18  | 0.401440776 | 1.48E-21 | 2.36E-20 | 520 | 507 |
| C9orf109 | 0.401383815 | 1.50E-21 | 2.39E-20 | 520 | 519 |
| LASP1    | 0.400945395 | 1.68E-21 | 2.67E-20 | 520 | 520 |
| FAM160B1 | 0.40087166  | 1.71E-21 | 2.71E-20 | 520 | 520 |
| SH3KBP1  | 0.400815896 | 1.73E-21 | 2.75E-20 | 520 | 520 |

|           |             |          |          |     |     |
|-----------|-------------|----------|----------|-----|-----|
| MYH10     | 0.400723605 | 1.77E-21 | 2.81E-20 | 520 | 520 |
| EXTL1     | 0.400297584 | 1.97E-21 | 3.12E-20 | 520 | 450 |
| TRAK2     | 0.400149264 | 2.04E-21 | 3.23E-20 | 520 | 520 |
| EMX2      | 0.399951702 | 2.15E-21 | 3.40E-20 | 520 | 503 |
| C5orf62   | 0.399928008 | 2.16E-21 | 3.41E-20 | 520 | 520 |
| RNASE4    | 0.399731224 | 2.27E-21 | 3.58E-20 | 520 | 520 |
| RPGRIP1L  | 0.399645055 | 2.32E-21 | 3.65E-20 | 520 | 520 |
| ELK3      | 0.399573169 | 2.36E-21 | 3.72E-20 | 520 | 520 |
| DCHS2     | 0.39920014  | 2.59E-21 | 4.07E-20 | 520 | 503 |
| ANKRD1    | 0.399136249 | 2.63E-21 | 4.13E-20 | 520 | 484 |
| SERPINA1  | 0.398961411 | 2.75E-21 | 4.31E-20 | 520 | 520 |
| PDE4A     | 0.398874914 | 2.81E-21 | 4.40E-20 | 520 | 520 |
| ZNF578    | 0.398861856 | 2.81E-21 | 4.41E-20 | 520 | 515 |
| EMX2OS    | 0.398861727 | 2.81E-21 | 4.41E-20 | 520 | 509 |
| CD84      | 0.398842742 | 2.83E-21 | 4.43E-20 | 520 | 520 |
| MGC45800  | 0.398694303 | 2.93E-21 | 4.59E-20 | 520 | 517 |
| NOG       | 0.398644496 | 2.97E-21 | 4.64E-20 | 520 | 466 |
| PRKACB    | 0.398573194 | 3.02E-21 | 4.72E-20 | 520 | 520 |
| SCN5A     | 0.398400104 | 3.16E-21 | 4.93E-20 | 520 | 508 |
| CASQ2     | 0.398263847 | 3.26E-21 | 5.09E-20 | 520 | 508 |
| 4-Mar     | 0.398247824 | 3.28E-21 | 5.11E-20 | 520 | 499 |
| PLXDC2    | 0.398190118 | 3.32E-21 | 5.18E-20 | 520 | 520 |
| AR        | 0.398142926 | 3.36E-21 | 5.23E-20 | 520 | 460 |
| SERINC1   | 0.397696041 | 3.76E-21 | 5.84E-20 | 520 | 520 |
| ADRA1D    | 0.397683711 | 3.77E-21 | 5.85E-20 | 520 | 502 |
| ORAI2     | 0.397657249 | 3.79E-21 | 5.88E-20 | 520 | 520 |
| ZNF532    | 0.397385094 | 4.06E-21 | 6.29E-20 | 520 | 520 |
| AQP9      | 0.397323946 | 4.12E-21 | 6.38E-20 | 520 | 520 |
| MYL3      | 0.397089213 | 4.36E-21 | 6.75E-20 | 520 | 452 |
| CDX1      | 0.396534416 | 5.00E-21 | 7.71E-20 | 520 | 512 |
| ERMN      | 0.396309259 | 5.29E-21 | 8.15E-20 | 520 | 512 |
| PDE10A    | 0.396118783 | 5.54E-21 | 8.53E-20 | 520 | 518 |
| GLRB      | 0.396018612 | 5.68E-21 | 8.74E-20 | 520 | 511 |
| FAT3      | 0.395752096 | 6.06E-21 | 9.32E-20 | 520 | 480 |
| RAB11FIP2 | 0.395663583 | 6.20E-21 | 9.52E-20 | 520 | 520 |
| LRRN4     | 0.3950704   | 7.17E-21 | 1.10E-19 | 520 | 489 |
| MFAP4     | 0.39500165  | 7.29E-21 | 1.12E-19 | 520 | 520 |
| GOPC      | 0.394696438 | 7.86E-21 | 1.20E-19 | 520 | 520 |
| RECQL     | 0.394448721 | 8.35E-21 | 1.28E-19 | 520 | 520 |
| NACAD     | 0.394056552 | 9.19E-21 | 1.40E-19 | 520 | 520 |
| SIGLEC15  | 0.394045882 | 9.21E-21 | 1.40E-19 | 520 | 465 |
| NAGA      | 0.393826765 | 9.72E-21 | 1.48E-19 | 520 | 520 |
| COL25A1   | 0.393631467 | 1.02E-20 | 1.55E-19 | 520 | 417 |
| KCNMB4    | 0.393581171 | 1.03E-20 | 1.57E-19 | 520 | 520 |
| LOC285954 | 0.393520148 | 1.05E-20 | 1.59E-19 | 520 | 428 |
| ZYX       | 0.393256965 | 1.12E-20 | 1.70E-19 | 520 | 520 |

|          |             |          |          |     |     |
|----------|-------------|----------|----------|-----|-----|
| C9orf47  | 0.393098779 | 1.16E-20 | 1.76E-19 | 520 | 473 |
| TIMP4    | 0.392813119 | 1.24E-20 | 1.88E-19 | 520 | 505 |
| C10orf10 | 0.392491433 | 1.34E-20 | 2.04E-19 | 520 | 520 |
| PLOD2    | 0.39233432  | 1.40E-20 | 2.11E-19 | 520 | 520 |
| ILK      | 0.392188744 | 1.45E-20 | 2.19E-19 | 520 | 520 |
| TSPAN4   | 0.391991079 | 1.52E-20 | 2.29E-19 | 520 | 520 |
| SUCNR1   | 0.391951501 | 1.53E-20 | 2.31E-19 | 520 | 487 |
| SLC12A4  | 0.391768755 | 1.60E-20 | 2.41E-19 | 520 | 520 |
| C1orf70  | 0.391569242 | 1.68E-20 | 2.53E-19 | 520 | 504 |
| TCTN3    | 0.391360237 | 1.77E-20 | 2.66E-19 | 520 | 520 |
| MAML2    | 0.39134429  | 1.78E-20 | 2.67E-19 | 520 | 520 |
| ANKH     | 0.391311459 | 1.79E-20 | 2.69E-19 | 520 | 520 |
| TMEM132E | 0.391231666 | 1.82E-20 | 2.74E-19 | 520 | 482 |
| TK2      | 0.390656747 | 2.10E-20 | 3.14E-19 | 520 | 520 |
| KAL1     | 0.390513898 | 2.17E-20 | 3.25E-19 | 520 | 520 |
| EFNB3    | 0.390371806 | 2.25E-20 | 3.36E-19 | 520 | 520 |
| HSPB2    | 0.390350008 | 2.26E-20 | 3.37E-19 | 520 | 520 |
| SIGLEC7  | 0.390338061 | 2.26E-20 | 3.38E-19 | 520 | 517 |
| CYP1B1   | 0.390294309 | 2.29E-20 | 3.41E-19 | 520 | 520 |
| CHRNA3   | 0.390265513 | 2.30E-20 | 3.43E-19 | 520 | 389 |
| MMP1     | 0.390246822 | 2.31E-20 | 3.45E-19 | 520 | 520 |
| RASGRF1  | 0.390028894 | 2.44E-20 | 3.63E-19 | 520 | 517 |
| SLC39A8  | 0.389947871 | 2.49E-20 | 3.70E-19 | 520 | 520 |
| C19orf59 | 0.389832066 | 2.56E-20 | 3.80E-19 | 520 | 507 |
| MAGED1   | 0.389803572 | 2.57E-20 | 3.82E-19 | 520 | 520 |
| SLC8A3   | 0.389770772 | 2.60E-20 | 3.85E-19 | 520 | 479 |
| RAI2     | 0.389681611 | 2.65E-20 | 3.93E-19 | 520 | 518 |
| ODZ4     | 0.389093144 | 3.05E-20 | 4.52E-19 | 520 | 520 |
| CHRNA2   | 0.388931787 | 3.17E-20 | 4.69E-19 | 520 | 279 |
| CREB5    | 0.388838256 | 3.25E-20 | 4.80E-19 | 520 | 520 |
| MYL4     | 0.38874073  | 3.32E-20 | 4.91E-19 | 520 | 501 |
| CDC42BPA | 0.388529238 | 3.50E-20 | 5.15E-19 | 520 | 520 |
| APOD     | 0.388312124 | 3.68E-20 | 5.42E-19 | 520 | 520 |
| OPCML    | 0.388226399 | 3.76E-20 | 5.53E-19 | 520 | 420 |
| PREX2    | 0.388109639 | 3.87E-20 | 5.68E-19 | 520 | 513 |
| HMGXB3   | 0.388046065 | 3.93E-20 | 5.76E-19 | 520 | 520 |
| EFNB2    | 0.387992057 | 3.98E-20 | 5.83E-19 | 520 | 520 |
| RFTN2    | 0.387912519 | 4.05E-20 | 5.93E-19 | 520 | 520 |
| MYPN     | 0.387719618 | 4.24E-20 | 6.21E-19 | 520 | 458 |
| ITGA7    | 0.387609346 | 4.36E-20 | 6.37E-19 | 520 | 520 |
| KCNQ3    | 0.387571137 | 4.40E-20 | 6.42E-19 | 520 | 480 |
| PDZRN4   | 0.387532527 | 4.44E-20 | 6.48E-19 | 520 | 462 |
| HAS2AS   | 0.38751074  | 4.46E-20 | 6.51E-19 | 520 | 496 |
| MYOCD    | 0.387492775 | 4.48E-20 | 6.53E-19 | 520 | 446 |
| LDLRAD3  | 0.387367074 | 4.62E-20 | 6.73E-19 | 520 | 520 |
| DCBLD1   | 0.387357598 | 4.63E-20 | 6.74E-19 | 520 | 520 |

|           |             |          |          |     |     |
|-----------|-------------|----------|----------|-----|-----|
| PODXL     | 0.387035949 | 5.00E-20 | 7.26E-19 | 520 | 520 |
| CASS4     | 0.386966556 | 5.08E-20 | 7.38E-19 | 520 | 520 |
| COL22A1   | 0.38661615  | 5.52E-20 | 8.01E-19 | 520 | 519 |
| TBCEL     | 0.386579072 | 5.57E-20 | 8.08E-19 | 520 | 520 |
| CAMK2N1   | 0.386477966 | 5.71E-20 | 8.27E-19 | 520 | 520 |
| TSPAN18   | 0.386307756 | 5.94E-20 | 8.60E-19 | 520 | 520 |
| FAM20C    | 0.386175683 | 6.13E-20 | 8.87E-19 | 520 | 520 |
| DZIP1     | 0.385964423 | 6.45E-20 | 9.31E-19 | 520 | 520 |
| SLC35B4   | 0.385740012 | 6.80E-20 | 9.81E-19 | 520 | 520 |
| PDIA5     | 0.385574954 | 7.07E-20 | 1.02E-18 | 520 | 520 |
| SV2A      | 0.385447966 | 7.29E-20 | 1.05E-18 | 520 | 520 |
| MYF5      | 0.385401599 | 7.37E-20 | 1.06E-18 | 520 | 251 |
| ARHGEF10  | 0.385348885 | 7.46E-20 | 1.07E-18 | 520 | 520 |
| SHC3      | 0.385233022 | 7.67E-20 | 1.10E-18 | 520 | 517 |
| TMEM176A  | 0.385208314 | 7.71E-20 | 1.11E-18 | 520 | 520 |
| INSRR     | 0.385151262 | 7.82E-20 | 1.12E-18 | 520 | 443 |
| FAM134B   | 0.385041769 | 8.02E-20 | 1.15E-18 | 520 | 520 |
| MN1       | 0.384983987 | 8.13E-20 | 1.17E-18 | 520 | 520 |
| PKNOX2    | 0.384585279 | 8.94E-20 | 1.28E-18 | 520 | 517 |
| LOC653653 | 0.384566203 | 8.98E-20 | 1.28E-18 | 520 | 517 |
| FCGR3A    | 0.384536297 | 9.04E-20 | 1.29E-18 | 520 | 520 |
| P4HA2     | 0.384529108 | 9.06E-20 | 1.29E-18 | 520 | 520 |
| GRK5      | 0.384366974 | 9.41E-20 | 1.34E-18 | 520 | 520 |
| RNF144A   | 0.384267484 | 9.63E-20 | 1.37E-18 | 520 | 520 |
| SPATA13   | 0.3842317   | 9.71E-20 | 1.39E-18 | 520 | 519 |
| C1orf187  | 0.384206303 | 9.77E-20 | 1.39E-18 | 520 | 495 |
| RNASE1    | 0.384136995 | 9.93E-20 | 1.41E-18 | 520 | 520 |
| LTBP1     | 0.384052172 | 1.01E-19 | 1.44E-18 | 520 | 520 |
| TNFSF11   | 0.384013282 | 1.02E-19 | 1.45E-18 | 520 | 518 |
| LEF1      | 0.383947796 | 1.04E-19 | 1.48E-18 | 520 | 520 |
| LRP12     | 0.383803039 | 1.07E-19 | 1.53E-18 | 520 | 520 |
| PCDHB4    | 0.383743517 | 1.09E-19 | 1.54E-18 | 520 | 517 |
| TMEM136   | 0.38371993  | 1.10E-19 | 1.55E-18 | 520 | 520 |
| ERG       | 0.383559067 | 1.14E-19 | 1.61E-18 | 520 | 520 |
| SURF4     | 0.383545652 | 1.14E-19 | 1.61E-18 | 520 | 520 |
| CBLB      | 0.383540353 | 1.14E-19 | 1.61E-18 | 520 | 520 |
| FOXP1     | 0.38332455  | 1.20E-19 | 1.69E-18 | 520 | 520 |
| TP53I11   | 0.382809446 | 1.36E-19 | 1.91E-18 | 520 | 520 |
| GSTM5     | 0.382640558 | 1.41E-19 | 1.99E-18 | 520 | 518 |
| CD200     | 0.382622351 | 1.42E-19 | 1.99E-18 | 520 | 520 |
| FAM48B1   | 0.382540795 | 1.45E-19 | 2.03E-18 | 520 | 152 |
| GJA4      | 0.382492999 | 1.46E-19 | 2.05E-18 | 520 | 520 |
| DIRAS1    | 0.382412196 | 1.49E-19 | 2.09E-18 | 520 | 519 |
| F2RL3     | 0.382393528 | 1.50E-19 | 2.10E-18 | 520 | 520 |
| PTPRO     | 0.382340556 | 1.52E-19 | 2.12E-18 | 520 | 519 |
| MFAP3L    | 0.382291259 | 1.53E-19 | 2.14E-18 | 520 | 518 |

|          |             |          |          |     |     |
|----------|-------------|----------|----------|-----|-----|
| TOX2     | 0.382178394 | 1.57E-19 | 2.20E-18 | 520 | 520 |
| CFL2     | 0.382171676 | 1.58E-19 | 2.20E-18 | 520 | 520 |
| NCAM2    | 0.382112477 | 1.60E-19 | 2.23E-18 | 520 | 484 |
| CYYR1    | 0.381953205 | 1.66E-19 | 2.31E-18 | 520 | 520 |
| MTMR2    | 0.381884771 | 1.69E-19 | 2.35E-18 | 520 | 520 |
| EIF2AK4  | 0.381821478 | 1.71E-19 | 2.38E-18 | 520 | 520 |
| TRAM1L1  | 0.381803987 | 1.72E-19 | 2.39E-18 | 520 | 511 |
| CSPG4    | 0.381787626 | 1.73E-19 | 2.40E-18 | 520 | 520 |
| C1orf216 | 0.381653611 | 1.78E-19 | 2.47E-18 | 520 | 520 |
| TANC2    | 0.381441173 | 1.87E-19 | 2.60E-18 | 520 | 520 |
| FPR1     | 0.381193413 | 1.98E-19 | 2.75E-18 | 520 | 520 |
| MGAT5B   | 0.380951129 | 2.10E-19 | 2.91E-18 | 520 | 519 |
| NKAIN4   | 0.380926462 | 2.11E-19 | 2.92E-18 | 520 | 424 |
| DPT      | 0.380779938 | 2.18E-19 | 3.01E-18 | 520 | 519 |
| GYPC     | 0.380679444 | 2.24E-19 | 3.08E-18 | 520 | 520 |
| SEC22C   | 0.380634528 | 2.26E-19 | 3.11E-18 | 520 | 520 |
| CLEC14A  | 0.380485682 | 2.34E-19 | 3.22E-18 | 520 | 520 |
| ASB5     | 0.380387787 | 2.39E-19 | 3.29E-18 | 520 | 347 |
| ACTC1    | 0.380359243 | 2.41E-19 | 3.31E-18 | 520 | 492 |
| PNMAL1   | 0.380196311 | 2.50E-19 | 3.43E-18 | 520 | 513 |
| PLAC9    | 0.379949063 | 2.65E-19 | 3.63E-18 | 520 | 520 |
| CD302    | 0.379803667 | 2.74E-19 | 3.75E-18 | 520 | 520 |
| SLC16A10 | 0.379699268 | 2.81E-19 | 3.84E-18 | 520 | 520 |
| NTNG1    | 0.379684737 | 2.82E-19 | 3.85E-18 | 520 | 446 |
| TRIM55   | 0.379616488 | 2.86E-19 | 3.91E-18 | 520 | 449 |
| ITGA10   | 0.379601132 | 2.87E-19 | 3.93E-18 | 520 | 520 |
| LOXHD1   | 0.379377361 | 3.03E-19 | 4.13E-18 | 520 | 474 |
| SLC22A4  | 0.379097311 | 3.23E-19 | 4.40E-18 | 520 | 519 |
| DYRK2    | 0.378785933 | 3.47E-19 | 4.72E-18 | 520 | 520 |
| PCDHB5   | 0.37869602  | 3.54E-19 | 4.82E-18 | 520 | 518 |
| CD300E   | 0.378442749 | 3.76E-19 | 5.10E-18 | 520 | 448 |
| CHGB     | 0.378127179 | 4.04E-19 | 5.48E-18 | 520 | 513 |
| ANKRD40  | 0.377982068 | 4.18E-19 | 5.66E-18 | 520 | 520 |
| WNT5A    | 0.377892542 | 4.27E-19 | 5.77E-18 | 520 | 520 |
| PHACTR1  | 0.377776888 | 4.38E-19 | 5.92E-18 | 520 | 515 |
| DNAJC10  | 0.377467341 | 4.71E-19 | 6.34E-18 | 520 | 520 |
| HAND2    | 0.377466892 | 4.71E-19 | 6.34E-18 | 520 | 464 |
| TRIM3    | 0.37734077  | 4.85E-19 | 6.52E-18 | 520 | 520 |
| ALPK3    | 0.377221748 | 4.98E-19 | 6.70E-18 | 520 | 520 |
| PTRF     | 0.376829178 | 5.45E-19 | 7.31E-18 | 520 | 520 |
| MS4A7    | 0.376741176 | 5.57E-19 | 7.45E-18 | 520 | 520 |
| TRIM9    | 0.376640753 | 5.70E-19 | 7.62E-18 | 520 | 518 |
| APLN     | 0.376407414 | 6.01E-19 | 8.02E-18 | 520 | 520 |
| SLC2A6   | 0.37636797  | 6.06E-19 | 8.09E-18 | 520 | 520 |
| GREM2    | 0.376352565 | 6.09E-19 | 8.12E-18 | 520 | 493 |
| PHC1     | 0.376297757 | 6.16E-19 | 8.21E-18 | 520 | 520 |

|          |             |          |          |     |     |
|----------|-------------|----------|----------|-----|-----|
| PTPRD    | 0.376273085 | 6.20E-19 | 8.25E-18 | 520 | 519 |
| PRDM16   | 0.376259316 | 6.22E-19 | 8.27E-18 | 520 | 518 |
| ISLR2    | 0.376154304 | 6.37E-19 | 8.47E-18 | 520 | 516 |
| CRYBB1   | 0.376067747 | 6.50E-19 | 8.63E-18 | 520 | 488 |
| BBS12    | 0.376046803 | 6.53E-19 | 8.67E-18 | 520 | 520 |
| ARL15    | 0.375952147 | 6.67E-19 | 8.85E-18 | 520 | 520 |
| TMEM176B | 0.375828052 | 6.86E-19 | 9.10E-18 | 520 | 520 |
| ZNF853   | 0.375803265 | 6.90E-19 | 9.15E-18 | 520 | 520 |
| C12orf53 | 0.375532133 | 7.35E-19 | 9.71E-18 | 520 | 511 |
| EPHB2    | 0.37548156  | 7.43E-19 | 9.82E-18 | 520 | 520 |
| NLRP3    | 0.375380594 | 7.60E-19 | 1.00E-17 | 520 | 520 |
| CUL7     | 0.375255179 | 7.83E-19 | 1.03E-17 | 520 | 520 |
| KLHL5    | 0.375012687 | 8.27E-19 | 1.09E-17 | 520 | 520 |
| PILRA    | 0.374654152 | 8.98E-19 | 1.18E-17 | 520 | 520 |
| HS3ST3B1 | 0.374606678 | 9.08E-19 | 1.19E-17 | 520 | 514 |
| ALPL     | 0.374593724 | 9.10E-19 | 1.20E-17 | 520 | 520 |
| GBGT1    | 0.374586043 | 9.12E-19 | 1.20E-17 | 520 | 520 |
| IL10     | 0.374452325 | 9.40E-19 | 1.23E-17 | 520 | 518 |
| DOK1     | 0.374433217 | 9.44E-19 | 1.24E-17 | 520 | 520 |
| SGCA     | 0.37436594  | 9.59E-19 | 1.26E-17 | 520 | 499 |
| ANGPTL7  | 0.3742898   | 9.76E-19 | 1.28E-17 | 520 | 372 |
| PDIA4    | 0.37416944  | 1.00E-18 | 1.31E-17 | 520 | 520 |
| PCDHGA6  | 0.373929096 | 1.06E-18 | 1.38E-17 | 520 | 510 |
| GPR34    | 0.373767392 | 1.10E-18 | 1.43E-17 | 520 | 520 |
| C2orf84  | 0.373743372 | 1.11E-18 | 1.44E-17 | 520 | 475 |
| PRSS35   | 0.37357606  | 1.15E-18 | 1.49E-17 | 520 | 460 |
| SEL1L    | 0.373529437 | 1.16E-18 | 1.51E-17 | 520 | 520 |
| LCTL     | 0.373527024 | 1.16E-18 | 1.51E-17 | 520 | 477 |
| SEMA7A   | 0.37350375  | 1.17E-18 | 1.52E-17 | 520 | 520 |
| GLS      | 0.37342746  | 1.19E-18 | 1.54E-17 | 520 | 520 |
| PCDHGA5  | 0.373197283 | 1.25E-18 | 1.62E-17 | 520 | 505 |
| GPR88    | 0.373062896 | 1.29E-18 | 1.67E-17 | 520 | 382 |
| PLEKHO1  | 0.373015852 | 1.30E-18 | 1.69E-17 | 520 | 520 |
| ADCY2    | 0.372843003 | 1.36E-18 | 1.76E-17 | 520 | 505 |
| INHBB    | 0.372556109 | 1.45E-18 | 1.87E-17 | 520 | 520 |
| SCN4A    | 0.372513839 | 1.46E-18 | 1.89E-17 | 520 | 467 |
| SPP1     | 0.372163295 | 1.58E-18 | 2.04E-17 | 520 | 520 |
| VEGFC    | 0.372104502 | 1.60E-18 | 2.07E-17 | 520 | 519 |
| TNFRSF9  | 0.37197955  | 1.65E-18 | 2.12E-17 | 520 | 520 |
| HIP1     | 0.371972531 | 1.65E-18 | 2.13E-17 | 520 | 520 |
| ZNF835   | 0.371908243 | 1.68E-18 | 2.16E-17 | 520 | 450 |
| HDLBP    | 0.371760224 | 1.73E-18 | 2.23E-17 | 520 | 520 |
| NKAPL    | 0.371679754 | 1.76E-18 | 2.27E-17 | 520 | 501 |
| NTN4     | 0.371368387 | 1.89E-18 | 2.43E-17 | 520 | 520 |
| ZNF496   | 0.371136333 | 2.00E-18 | 2.56E-17 | 520 | 520 |
| ZNF167   | 0.371094998 | 2.01E-18 | 2.58E-17 | 520 | 519 |

|          |             |          |          |     |     |
|----------|-------------|----------|----------|-----|-----|
| ATP6V0D2 | 0.371074091 | 2.02E-18 | 2.59E-17 | 520 | 518 |
| GPRIN3   | 0.37105307  | 2.03E-18 | 2.60E-17 | 520 | 520 |
| SMOC2    | 0.370750135 | 2.18E-18 | 2.78E-17 | 520 | 520 |
| IQGAP2   | 0.370576742 | 2.26E-18 | 2.89E-17 | 520 | 520 |
| MCHR1    | 0.370413393 | 2.35E-18 | 2.99E-17 | 520 | 510 |
| ATF2     | 0.370384317 | 2.36E-18 | 3.01E-17 | 520 | 520 |
| CD86     | 0.370349399 | 2.38E-18 | 3.03E-17 | 520 | 520 |
| FBLN1    | 0.370258654 | 2.43E-18 | 3.09E-17 | 520 | 520 |
| RBM43    | 0.370199096 | 2.46E-18 | 3.13E-17 | 520 | 520 |
| C15orf54 | 0.370161483 | 2.48E-18 | 3.16E-17 | 520 | 424 |
| UACA     | 0.370148343 | 2.49E-18 | 3.16E-17 | 520 | 520 |
| IL2RA    | 0.370142941 | 2.50E-18 | 3.16E-17 | 520 | 520 |
| PREX1    | 0.370112494 | 2.51E-18 | 3.18E-17 | 520 | 520 |
| HILS1    | 0.370084523 | 2.53E-18 | 3.20E-17 | 520 | 272 |
| C10orf25 | 0.369785668 | 2.70E-18 | 3.42E-17 | 520 | 518 |
| BMPER    | 0.369585127 | 2.83E-18 | 3.57E-17 | 520 | 511 |
| ITSN1    | 0.369584035 | 2.83E-18 | 3.57E-17 | 520 | 520 |
| TMEM108  | 0.369490068 | 2.89E-18 | 3.65E-17 | 520 | 515 |
| SIRPA    | 0.369467155 | 2.90E-18 | 3.66E-17 | 520 | 520 |
| ZC4H2    | 0.369436362 | 2.92E-18 | 3.69E-17 | 520 | 519 |
| CCR1     | 0.369412833 | 2.94E-18 | 3.70E-17 | 520 | 520 |
| POU2F2   | 0.369250134 | 3.05E-18 | 3.84E-17 | 520 | 520 |
| PSAP     | 0.36918508  | 3.09E-18 | 3.89E-17 | 520 | 520 |
| COPA     | 0.369126847 | 3.13E-18 | 3.94E-17 | 520 | 520 |
| FSD1L    | 0.369085505 | 3.16E-18 | 3.97E-17 | 520 | 519 |
| ZFHX4    | 0.368890562 | 3.30E-18 | 4.14E-17 | 520 | 519 |
| TDO2     | 0.368595778 | 3.53E-18 | 4.42E-17 | 520 | 519 |
| CYBB     | 0.368267998 | 3.80E-18 | 4.75E-17 | 520 | 520 |
| CHST14   | 0.368069452 | 3.97E-18 | 4.96E-17 | 520 | 520 |
| RCVRN    | 0.368035051 | 4.00E-18 | 5.00E-17 | 520 | 341 |
| GANAB    | 0.367996174 | 4.04E-18 | 5.04E-17 | 520 | 520 |
| SOX5     | 0.367722054 | 4.29E-18 | 5.35E-17 | 520 | 494 |
| ADARB1   | 0.367670043 | 4.34E-18 | 5.41E-17 | 520 | 520 |
| EPHX4    | 0.36762573  | 4.38E-18 | 5.45E-17 | 520 | 507 |
| GNB1     | 0.367495898 | 4.51E-18 | 5.60E-17 | 520 | 520 |
| ZBTB38   | 0.367495403 | 4.51E-18 | 5.60E-17 | 520 | 520 |
| VGLL2    | 0.367425364 | 4.58E-18 | 5.68E-17 | 520 | 328 |
| ATRN     | 0.367346046 | 4.67E-18 | 5.78E-17 | 520 | 520 |
| CRTC3    | 0.367336602 | 4.67E-18 | 5.79E-17 | 520 | 520 |
| EVI5     | 0.367219918 | 4.80E-18 | 5.94E-17 | 520 | 520 |
| GREB1L   | 0.366822111 | 5.24E-18 | 6.47E-17 | 520 | 409 |
| SCN2B    | 0.366764341 | 5.31E-18 | 6.55E-17 | 520 | 508 |
| AKAP13   | 0.366666413 | 5.43E-18 | 6.69E-17 | 520 | 520 |
| RPLPOP2  | 0.366660795 | 5.43E-18 | 6.69E-17 | 520 | 520 |
| PGM3     | 0.366531899 | 5.59E-18 | 6.88E-17 | 520 | 520 |
| 1-Mar    | 0.366406929 | 5.75E-18 | 7.07E-17 | 520 | 519 |



|           |             |          |          |     |     |
|-----------|-------------|----------|----------|-----|-----|
| B3GNT9    | 0.366367708 | 5.80E-18 | 7.13E-17 | 520 | 520 |
| KLF7      | 0.366216659 | 6.00E-18 | 7.36E-17 | 520 | 520 |
| PTGER3    | 0.366017036 | 6.27E-18 | 7.69E-17 | 520 | 520 |
| IL11      | 0.365863254 | 6.48E-18 | 7.94E-17 | 520 | 520 |
| RAB11FIP5 | 0.365842932 | 6.51E-18 | 7.97E-17 | 520 | 520 |
| CYP46A1   | 0.365623729 | 6.84E-18 | 8.35E-17 | 520 | 508 |
| CDH23     | 0.36554762  | 6.95E-18 | 8.49E-17 | 520 | 520 |
| PCSK5     | 0.365508222 | 7.01E-18 | 8.56E-17 | 520 | 518 |
| SLC38A4   | 0.365462787 | 7.08E-18 | 8.64E-17 | 520 | 518 |
| RNF24     | 0.365265054 | 7.40E-18 | 9.01E-17 | 520 | 520 |
| RSPRY1    | 0.365109534 | 7.66E-18 | 9.32E-17 | 520 | 520 |
| ZNF70     | 0.364885096 | 8.05E-18 | 9.78E-17 | 520 | 520 |
| PCDHGC3   | 0.36477365  | 8.25E-18 | 1.00E-16 | 520 | 520 |
| LOC339524 | 0.364672865 | 8.44E-18 | 1.02E-16 | 520 | 519 |
| CRIM1     | 0.364567832 | 8.63E-18 | 1.05E-16 | 520 | 520 |
| RNF150    | 0.364506676 | 8.75E-18 | 1.06E-16 | 520 | 514 |
| CEP170L   | 0.364271384 | 9.22E-18 | 1.12E-16 | 520 | 414 |
| CILP2     | 0.364172083 | 9.42E-18 | 1.14E-16 | 520 | 519 |
| DOCK7     | 0.363975105 | 9.84E-18 | 1.19E-16 | 520 | 520 |
| GREB1     | 0.363961581 | 9.87E-18 | 1.19E-16 | 520 | 520 |
| ZNF366    | 0.363908833 | 9.98E-18 | 1.21E-16 | 520 | 510 |
| RUNDC2A   | 0.363797188 | 1.02E-17 | 1.23E-16 | 520 | 518 |
| MYBPH     | 0.36366284  | 1.05E-17 | 1.27E-16 | 520 | 447 |
| OSCAR     | 0.363469525 | 1.10E-17 | 1.32E-16 | 520 | 520 |
| PTPN14    | 0.363388744 | 1.12E-17 | 1.35E-16 | 520 | 520 |
| OSBPL5    | 0.363384828 | 1.12E-17 | 1.35E-16 | 520 | 520 |
| CST2      | 0.363324204 | 1.13E-17 | 1.36E-16 | 520 | 374 |
| ELOVL2    | 0.363317915 | 1.14E-17 | 1.36E-16 | 520 | 517 |
| RELN      | 0.363015351 | 1.21E-17 | 1.46E-16 | 520 | 506 |
| ARCN1     | 0.36297465  | 1.23E-17 | 1.47E-16 | 520 | 520 |
| CCRL2     | 0.362959423 | 1.23E-17 | 1.47E-16 | 520 | 520 |
| MUSK      | 0.362895501 | 1.25E-17 | 1.49E-16 | 520 | 378 |
| PIP5K1C   | 0.362841293 | 1.26E-17 | 1.51E-16 | 520 | 520 |
| C10orf128 | 0.362810212 | 1.27E-17 | 1.52E-16 | 520 | 504 |
| STARD3NL  | 0.362751103 | 1.29E-17 | 1.54E-16 | 520 | 520 |
| CCL13     | 0.362688685 | 1.30E-17 | 1.56E-16 | 520 | 519 |
| WBSCR17   | 0.362425125 | 1.38E-17 | 1.65E-16 | 520 | 518 |
| LAIR1     | 0.36234766  | 1.41E-17 | 1.68E-16 | 520 | 520 |
| UHRF1BP1L | 0.362329221 | 1.41E-17 | 1.68E-16 | 520 | 520 |
| DYNC2H1   | 0.362280445 | 1.43E-17 | 1.70E-16 | 520 | 519 |
| AGPAT1    | 0.362212653 | 1.45E-17 | 1.72E-16 | 520 | 520 |
| C6orf145  | 0.362211657 | 1.45E-17 | 1.72E-16 | 520 | 520 |
| GDF11     | 0.362168532 | 1.46E-17 | 1.73E-16 | 520 | 520 |
| ALOX5     | 0.362136096 | 1.47E-17 | 1.75E-16 | 520 | 520 |
| EDNRB     | 0.362131521 | 1.47E-17 | 1.75E-16 | 520 | 519 |
| TMEM98    | 0.362060506 | 1.50E-17 | 1.77E-16 | 520 | 520 |

|               |             |          |          |     |     |
|---------------|-------------|----------|----------|-----|-----|
| TSPYL5        | 0.361931935 | 1.54E-17 | 1.82E-16 | 520 | 520 |
| C1orf38       | 0.361870047 | 1.56E-17 | 1.85E-16 | 520 | 520 |
| DUSP27        | 0.361806382 | 1.58E-17 | 1.87E-16 | 520 | 402 |
| ATP1A2        | 0.36180442  | 1.58E-17 | 1.87E-16 | 520 | 507 |
| STON1-GTF2A1L | 0.36169248  | 1.62E-17 | 1.92E-16 | 520 | 265 |
| ABCA1         | 0.361665434 | 1.63E-17 | 1.93E-16 | 520 | 520 |
| FBXO32        | 0.361594522 | 1.66E-17 | 1.96E-16 | 520 | 520 |
| IRS1          | 0.361455192 | 1.71E-17 | 2.01E-16 | 520 | 520 |
| SLC30A7       | 0.361445823 | 1.71E-17 | 2.02E-16 | 520 | 520 |
| FLJ16779      | 0.361385295 | 1.73E-17 | 2.04E-16 | 520 | 483 |
| OAF           | 0.361296614 | 1.77E-17 | 2.08E-16 | 520 | 520 |
| MTMR6         | 0.361099918 | 1.85E-17 | 2.17E-16 | 520 | 520 |
| CCDC92        | 0.361022191 | 1.88E-17 | 2.20E-16 | 520 | 520 |
| ITGB2         | 0.360841329 | 1.95E-17 | 2.29E-16 | 520 | 520 |
| INPPL1        | 0.360836277 | 1.95E-17 | 2.29E-16 | 520 | 520 |
| MYO9B         | 0.360576611 | 2.07E-17 | 2.42E-16 | 520 | 520 |
| ACTA1         | 0.360436073 | 2.13E-17 | 2.50E-16 | 520 | 518 |
| DUSP10        | 0.36026858  | 2.21E-17 | 2.59E-16 | 520 | 520 |
| SLC1A3        | 0.360247885 | 2.22E-17 | 2.60E-16 | 520 | 520 |
| MEGF10        | 0.360199864 | 2.24E-17 | 2.63E-16 | 520 | 516 |
| HK3           | 0.360145083 | 2.27E-17 | 2.65E-16 | 520 | 520 |
| C2            | 0.359991919 | 2.35E-17 | 2.74E-16 | 520 | 520 |
| LMOD3         | 0.359965194 | 2.36E-17 | 2.76E-16 | 520 | 493 |
| HAPLN4        | 0.35989995  | 2.40E-17 | 2.79E-16 | 520 | 473 |
| SKIL          | 0.359736136 | 2.48E-17 | 2.89E-16 | 520 | 520 |
| AGT           | 0.359686829 | 2.51E-17 | 2.92E-16 | 520 | 519 |
| SSH1          | 0.359684051 | 2.51E-17 | 2.92E-16 | 520 | 520 |
| FSTL3         | 0.359678578 | 2.51E-17 | 2.92E-16 | 520 | 520 |
| CSRNP2        | 0.359656034 | 2.53E-17 | 2.93E-16 | 520 | 520 |
| LOC400043     | 0.359606085 | 2.55E-17 | 2.96E-16 | 520 | 519 |
| DNM3          | 0.359584998 | 2.56E-17 | 2.97E-16 | 520 | 519 |
| TMEM214       | 0.359567771 | 2.57E-17 | 2.98E-16 | 520 | 520 |
| ALDH18A1      | 0.359552866 | 2.58E-17 | 2.99E-16 | 520 | 520 |
| MAB21L1       | 0.359458482 | 2.64E-17 | 3.05E-16 | 520 | 499 |
| CGB           | 0.35944802  | 2.64E-17 | 3.06E-16 | 520 | 476 |
| PDCD1LG2      | 0.359437333 | 2.65E-17 | 3.06E-16 | 520 | 519 |
| ARPP21        | 0.359390337 | 2.68E-17 | 3.09E-16 | 520 | 337 |
| SPTBN1        | 0.359342136 | 2.70E-17 | 3.12E-16 | 520 | 520 |
| C10orf26      | 0.359197103 | 2.79E-17 | 3.22E-16 | 520 | 520 |
| PTPN21        | 0.359174721 | 2.80E-17 | 3.23E-16 | 520 | 520 |
| NR5A2         | 0.359156399 | 2.81E-17 | 3.24E-16 | 520 | 520 |
| NR4A3         | 0.359134123 | 2.83E-17 | 3.25E-16 | 520 | 520 |
| SERINC3       | 0.359116926 | 2.84E-17 | 3.26E-16 | 520 | 520 |
| KCNA1         | 0.359105825 | 2.85E-17 | 3.27E-16 | 520 | 377 |
| HAS1          | 0.359000728 | 2.91E-17 | 3.34E-16 | 520 | 511 |
| CACNA1S       | 0.358910453 | 2.97E-17 | 3.41E-16 | 520 | 369 |

|              |             |          |          |     |     |
|--------------|-------------|----------|----------|-----|-----|
| XPNPEP2      | 0.358682733 | 3.12E-17 | 3.57E-16 | 520 | 506 |
| MLLT11       | 0.358515487 | 3.23E-17 | 3.70E-16 | 520 | 520 |
| MYOG         | 0.35841734  | 3.30E-17 | 3.78E-16 | 520 | 351 |
| PSD          | 0.358277086 | 3.40E-17 | 3.89E-16 | 520 | 520 |
| MYO10        | 0.358247303 | 3.42E-17 | 3.91E-16 | 520 | 520 |
| CCR8         | 0.358095044 | 3.54E-17 | 4.04E-16 | 520 | 496 |
| NPAS3        | 0.358039247 | 3.58E-17 | 4.08E-16 | 520 | 502 |
| CYSLTR2      | 0.357985918 | 3.62E-17 | 4.13E-16 | 520 | 506 |
| TBC1D19      | 0.35783664  | 3.74E-17 | 4.26E-16 | 520 | 520 |
| UNC45B       | 0.357793745 | 3.78E-17 | 4.29E-16 | 520 | 474 |
| HRC          | 0.357336925 | 4.17E-17 | 4.73E-16 | 520 | 517 |
| TSPAN9       | 0.357034804 | 4.45E-17 | 5.05E-16 | 520 | 520 |
| KLHL30       | 0.356863775 | 4.61E-17 | 5.23E-16 | 520 | 517 |
| CTSB         | 0.356823829 | 4.65E-17 | 5.27E-16 | 520 | 520 |
| PRELP        | 0.356800387 | 4.67E-17 | 5.29E-16 | 520 | 520 |
| SMYD1        | 0.356785046 | 4.69E-17 | 5.31E-16 | 520 | 318 |
| FRMD7        | 0.356763965 | 4.71E-17 | 5.33E-16 | 520 | 307 |
| ZNF154       | 0.356763432 | 4.71E-17 | 5.33E-16 | 520 | 519 |
| ARSI         | 0.356670268 | 4.81E-17 | 5.43E-16 | 520 | 520 |
| EMCN         | 0.356438277 | 5.05E-17 | 5.70E-16 | 520 | 520 |
| PI15         | 0.356434307 | 5.06E-17 | 5.70E-16 | 520 | 519 |
| SFMBT2       | 0.356343328 | 5.16E-17 | 5.81E-16 | 520 | 518 |
| FCAR         | 0.356307478 | 5.20E-17 | 5.85E-16 | 520 | 473 |
| SH3BP4       | 0.356292831 | 5.21E-17 | 5.87E-16 | 520 | 520 |
| CMTM1        | 0.35622153  | 5.29E-17 | 5.96E-16 | 520 | 520 |
| EVI2A        | 0.356090039 | 5.44E-17 | 6.11E-16 | 520 | 520 |
| PTTG1IP      | 0.355951614 | 5.61E-17 | 6.29E-16 | 520 | 520 |
| ZFH3         | 0.355719124 | 5.89E-17 | 6.60E-16 | 520 | 520 |
| C21orf7      | 0.355648619 | 5.98E-17 | 6.70E-16 | 520 | 520 |
| SOX17        | 0.355606941 | 6.04E-17 | 6.76E-16 | 520 | 520 |
| ZNF25        | 0.3554844   | 6.20E-17 | 6.93E-16 | 520 | 520 |
| PPP3CB       | 0.355353957 | 6.37E-17 | 7.12E-16 | 520 | 520 |
| BEST3        | 0.355253234 | 6.51E-17 | 7.27E-16 | 520 | 457 |
| HDAC9        | 0.355112716 | 6.71E-17 | 7.49E-16 | 520 | 520 |
| ANGPT1       | 0.355088267 | 6.74E-17 | 7.52E-16 | 520 | 516 |
| PXDNL        | 0.355079545 | 6.75E-17 | 7.53E-16 | 520 | 517 |
| TWSG1        | 0.355045427 | 6.80E-17 | 7.58E-16 | 520 | 520 |
| TRDN         | 0.354948746 | 6.95E-17 | 7.74E-16 | 520 | 402 |
| LOC158376    | 0.354905541 | 7.01E-17 | 7.80E-16 | 520 | 518 |
| PCDHGB5      | 0.354873532 | 7.06E-17 | 7.85E-16 | 520 | 510 |
| DAP          | 0.354844378 | 7.10E-17 | 7.90E-16 | 520 | 520 |
| C10orf71     | 0.354653595 | 7.40E-17 | 8.21E-16 | 520 | 308 |
| MYOT         | 0.354475105 | 7.68E-17 | 8.53E-16 | 520 | 476 |
| DES          | 0.354279017 | 8.01E-17 | 8.87E-16 | 520 | 516 |
| TMED7-TICAM2 | 0.354233274 | 8.09E-17 | 8.96E-16 | 520 | 514 |
| ZNF491       | 0.354222616 | 8.11E-17 | 8.97E-16 | 520 | 512 |

|           |             |          |          |     |     |
|-----------|-------------|----------|----------|-----|-----|
| DMXL2     | 0.354148682 | 8.23E-17 | 9.10E-16 | 520 | 520 |
| PYGO1     | 0.354095984 | 8.33E-17 | 9.20E-16 | 520 | 487 |
| MPP1      | 0.354054272 | 8.40E-17 | 9.28E-16 | 520 | 520 |
| PDK4      | 0.353868487 | 8.74E-17 | 9.64E-16 | 520 | 520 |
| FMO1      | 0.353747885 | 8.97E-17 | 9.89E-16 | 520 | 519 |
| FNIP2     | 0.353728332 | 9.00E-17 | 9.92E-16 | 520 | 520 |
| LPCAT2    | 0.353356444 | 9.74E-17 | 1.07E-15 | 520 | 520 |
| PDLIM7    | 0.353235305 | 1.00E-16 | 1.10E-15 | 520 | 520 |
| BMP4      | 0.352901182 | 1.07E-16 | 1.18E-15 | 520 | 520 |
| CGB5      | 0.352898468 | 1.07E-16 | 1.18E-15 | 520 | 483 |
| ELFN1     | 0.352884548 | 1.08E-16 | 1.18E-15 | 520 | 520 |
| ACTN2     | 0.352808164 | 1.09E-16 | 1.20E-15 | 520 | 502 |
| SYN1      | 0.352508744 | 1.17E-16 | 1.28E-15 | 520 | 518 |
| MBTPS1    | 0.352482848 | 1.17E-16 | 1.28E-15 | 520 | 520 |
| C4orf26   | 0.352346519 | 1.21E-16 | 1.32E-15 | 520 | 455 |
| ST3GAL5   | 0.352022825 | 1.29E-16 | 1.41E-15 | 520 | 520 |
| CDKL5     | 0.351958858 | 1.31E-16 | 1.43E-15 | 520 | 512 |
| PVRL3     | 0.351956011 | 1.31E-16 | 1.43E-15 | 520 | 515 |
| PCDHA3    | 0.35184193  | 1.34E-16 | 1.46E-15 | 520 | 339 |
| DNAJC3    | 0.351830036 | 1.35E-16 | 1.46E-15 | 520 | 520 |
| EHD2      | 0.351791753 | 1.36E-16 | 1.47E-15 | 520 | 520 |
| SMOC1     | 0.351632937 | 1.40E-16 | 1.52E-15 | 520 | 520 |
| SLC16A12  | 0.351557846 | 1.42E-16 | 1.55E-15 | 520 | 490 |
| RGAG4     | 0.351532014 | 1.43E-16 | 1.55E-15 | 520 | 519 |
| GNB4      | 0.351510958 | 1.44E-16 | 1.56E-15 | 520 | 520 |
| PGR       | 0.351426259 | 1.46E-16 | 1.59E-15 | 520 | 510 |
| TBXAS1    | 0.351392861 | 1.47E-16 | 1.60E-15 | 520 | 520 |
| A2BP1     | 0.351214379 | 1.53E-16 | 1.66E-15 | 520 | 348 |
| MSN       | 0.351064377 | 1.58E-16 | 1.71E-15 | 520 | 520 |
| CCDC141   | 0.350907077 | 1.63E-16 | 1.76E-15 | 520 | 498 |
| MYH1      | 0.350891608 | 1.64E-16 | 1.77E-15 | 520 | 383 |
| ASPHD2    | 0.350890029 | 1.64E-16 | 1.77E-15 | 520 | 520 |
| LEPROT    | 0.350854762 | 1.65E-16 | 1.78E-15 | 520 | 520 |
| GPR21     | 0.350835348 | 1.66E-16 | 1.79E-15 | 520 | 412 |
| WIPI1     | 0.350832178 | 1.66E-16 | 1.79E-15 | 520 | 520 |
| TMEM8C    | 0.350669166 | 1.72E-16 | 1.85E-15 | 520 | 223 |
| P704P     | 0.350606697 | 1.74E-16 | 1.87E-15 | 520 | 520 |
| PLIN2     | 0.350569057 | 1.75E-16 | 1.88E-15 | 520 | 520 |
| C20orf194 | 0.350412802 | 1.81E-16 | 1.95E-15 | 520 | 520 |
| DNAJC12   | 0.350333993 | 1.84E-16 | 1.98E-15 | 520 | 519 |
| TUB       | 0.350202885 | 1.89E-16 | 2.03E-15 | 520 | 520 |
| LILRA6    | 0.350159091 | 1.91E-16 | 2.05E-15 | 520 | 520 |
| RBPMS     | 0.350133855 | 1.92E-16 | 2.06E-15 | 520 | 520 |
| CD33      | 0.350082738 | 1.94E-16 | 2.08E-15 | 520 | 520 |
| GTDC1     | 0.350064521 | 1.95E-16 | 2.08E-15 | 520 | 520 |
| MYH8      | 0.349885654 | 2.02E-16 | 2.16E-15 | 520 | 309 |

|          |             |          |          |     |     |
|----------|-------------|----------|----------|-----|-----|
| MYF6     | 0.349817066 | 2.05E-16 | 2.19E-15 | 520 | 363 |
| ROCK1    | 0.349722454 | 2.09E-16 | 2.23E-15 | 520 | 520 |
| TOX      | 0.349655508 | 2.12E-16 | 2.26E-15 | 520 | 520 |
| FAM49A   | 0.34945393  | 2.21E-16 | 2.35E-15 | 520 | 520 |
| CELF2    | 0.349435869 | 2.22E-16 | 2.36E-15 | 520 | 520 |
| SMAD9    | 0.349320936 | 2.28E-16 | 2.42E-15 | 520 | 501 |
| CGB8     | 0.34912921  | 2.37E-16 | 2.51E-15 | 520 | 404 |
| CREBL2   | 0.349100565 | 2.38E-16 | 2.53E-15 | 520 | 520 |
| LCN1     | 0.349032692 | 2.42E-16 | 2.56E-15 | 520 | 341 |
| LRRRC8C  | 0.349008641 | 2.43E-16 | 2.57E-15 | 520 | 520 |
| ARHGAP36 | 0.349001983 | 2.43E-16 | 2.57E-15 | 520 | 318 |
| LGI2     | 0.348985002 | 2.44E-16 | 2.58E-15 | 520 | 520 |
| HYOU1    | 0.348833575 | 2.52E-16 | 2.66E-15 | 520 | 520 |
| CLEC4A   | 0.348806396 | 2.54E-16 | 2.68E-15 | 520 | 520 |
| SLC29A1  | 0.348758347 | 2.56E-16 | 2.70E-15 | 520 | 520 |
| SLC26A10 | 0.348665779 | 2.61E-16 | 2.75E-15 | 520 | 516 |
| LDOC1L   | 0.348651934 | 2.62E-16 | 2.76E-15 | 520 | 520 |
| ELMO1    | 0.348637154 | 2.63E-16 | 2.76E-15 | 520 | 520 |
| APLP2    | 0.348595556 | 2.65E-16 | 2.79E-15 | 520 | 520 |
| C11orf95 | 0.348545371 | 2.68E-16 | 2.81E-15 | 520 | 520 |
| KIAA0247 | 0.348511157 | 2.70E-16 | 2.83E-15 | 520 | 520 |
| SDCBP    | 0.348353292 | 2.79E-16 | 2.92E-15 | 520 | 520 |
| WSCD1    | 0.34834465  | 2.79E-16 | 2.93E-15 | 520 | 519 |
| ZNF208   | 0.348278324 | 2.83E-16 | 2.97E-15 | 520 | 491 |
| FAR2     | 0.348087941 | 2.94E-16 | 3.08E-15 | 520 | 518 |
| SLCO5A1  | 0.348072322 | 2.95E-16 | 3.09E-15 | 520 | 512 |
| ZNF677   | 0.34799488  | 3.00E-16 | 3.14E-15 | 520 | 515 |
| FAM23A   | 0.347968646 | 3.02E-16 | 3.16E-15 | 520 | 514 |
| DSE      | 0.347966148 | 3.02E-16 | 3.16E-15 | 520 | 520 |
| POU6F1   | 0.347943741 | 3.03E-16 | 3.17E-15 | 520 | 520 |
| FHL3     | 0.347813095 | 3.12E-16 | 3.25E-15 | 520 | 520 |
| MYL2     | 0.347510733 | 3.32E-16 | 3.46E-15 | 520 | 426 |
| PRKAB2   | 0.347472689 | 3.35E-16 | 3.48E-15 | 520 | 520 |
| KBTBD10  | 0.34743023  | 3.38E-16 | 3.51E-15 | 520 | 511 |
| IGSF6    | 0.347429092 | 3.38E-16 | 3.51E-15 | 520 | 520 |
| AP1M1    | 0.347220859 | 3.53E-16 | 3.66E-15 | 520 | 520 |
| SLC43A2  | 0.347068116 | 3.64E-16 | 3.77E-15 | 520 | 520 |
| TBC1D8B  | 0.346892776 | 3.77E-16 | 3.91E-15 | 520 | 520 |
| LILRB4   | 0.346778275 | 3.86E-16 | 4.00E-15 | 520 | 520 |
| TRAM1    | 0.34673315  | 3.90E-16 | 4.04E-15 | 520 | 520 |
| TXLNB    | 0.346710845 | 3.92E-16 | 4.05E-15 | 520 | 519 |
| BOC      | 0.346695005 | 3.93E-16 | 4.06E-15 | 520 | 520 |
| C7orf10  | 0.346631756 | 3.98E-16 | 4.12E-15 | 520 | 520 |
| FAM124A  | 0.346547932 | 4.05E-16 | 4.19E-15 | 520 | 520 |
| PECAM1   | 0.346501497 | 4.09E-16 | 4.22E-15 | 520 | 520 |
| C17orf51 | 0.346483416 | 4.11E-16 | 4.24E-15 | 520 | 520 |

|              |             |          |          |     |     |
|--------------|-------------|----------|----------|-----|-----|
| ARL6IP5      | 0.346403386 | 4.18E-16 | 4.31E-15 | 520 | 520 |
| TMEM43       | 0.346286741 | 4.28E-16 | 4.41E-15 | 520 | 520 |
| DPY19L3      | 0.346121574 | 4.43E-16 | 4.56E-15 | 520 | 520 |
| FNDC4        | 0.34604046  | 4.50E-16 | 4.63E-15 | 520 | 520 |
| ZC3H7B       | 0.346025035 | 4.51E-16 | 4.64E-15 | 520 | 520 |
| DAPK1        | 0.34587164  | 4.66E-16 | 4.78E-15 | 520 | 520 |
| RASAL2       | 0.345802443 | 4.73E-16 | 4.85E-15 | 520 | 520 |
| ITM2C        | 0.345779559 | 4.75E-16 | 4.87E-15 | 520 | 520 |
| MYBPC2       | 0.34570074  | 4.83E-16 | 4.95E-15 | 520 | 494 |
| ZNF827       | 0.3456519   | 4.88E-16 | 5.00E-15 | 520 | 519 |
| ZNF365       | 0.345582843 | 4.95E-16 | 5.06E-15 | 520 | 518 |
| ASB1         | 0.345536496 | 4.99E-16 | 5.11E-15 | 520 | 520 |
| NEB          | 0.345478151 | 5.05E-16 | 5.17E-15 | 520 | 520 |
| VPS13B       | 0.345446034 | 5.09E-16 | 5.20E-15 | 520 | 520 |
| PRKD3        | 0.345305845 | 5.24E-16 | 5.35E-15 | 520 | 520 |
| DDAH1        | 0.345178964 | 5.37E-16 | 5.49E-15 | 520 | 520 |
| UBTD2        | 0.345141757 | 5.42E-16 | 5.53E-15 | 520 | 520 |
| FAM43B       | 0.345118062 | 5.44E-16 | 5.55E-15 | 520 | 500 |
| NLRC4        | 0.345015787 | 5.56E-16 | 5.66E-15 | 520 | 519 |
| HS3ST2       | 0.344989873 | 5.59E-16 | 5.69E-15 | 520 | 506 |
| ITPRIPL2     | 0.344861052 | 5.74E-16 | 5.84E-15 | 520 | 520 |
| NMNAT2       | 0.344610314 | 6.04E-16 | 6.14E-15 | 520 | 520 |
| NDN          | 0.344533021 | 6.14E-16 | 6.24E-15 | 520 | 520 |
| C11orf24     | 0.344493892 | 6.19E-16 | 6.29E-15 | 520 | 520 |
| NAV3         | 0.344278343 | 6.47E-16 | 6.57E-15 | 520 | 520 |
| TMEM100      | 0.344183467 | 6.59E-16 | 6.69E-15 | 520 | 494 |
| SLN          | 0.344106668 | 6.70E-16 | 6.79E-15 | 520 | 487 |
| VCAM1        | 0.34408713  | 6.73E-16 | 6.82E-15 | 520 | 520 |
| PPP1R3A      | 0.344069749 | 6.75E-16 | 6.84E-15 | 520 | 258 |
| MGAM         | 0.344046104 | 6.78E-16 | 6.87E-15 | 520 | 504 |
| PTPRE        | 0.344007032 | 6.84E-16 | 6.92E-15 | 520 | 520 |
| KCNMA1       | 0.34377527  | 7.17E-16 | 7.24E-15 | 520 | 520 |
| ZAK          | 0.343761945 | 7.19E-16 | 7.26E-15 | 520 | 520 |
| CD80         | 0.343423979 | 7.70E-16 | 7.76E-15 | 520 | 520 |
| FOXF2        | 0.343411277 | 7.72E-16 | 7.77E-15 | 520 | 520 |
| DGKD         | 0.343384577 | 7.77E-16 | 7.81E-15 | 520 | 520 |
| C14orf135    | 0.343379216 | 7.77E-16 | 7.81E-15 | 520 | 520 |
| CCL18        | 0.343350235 | 7.82E-16 | 7.85E-15 | 520 | 520 |
| ELOVL5       | 0.342743439 | 8.85E-16 | 8.86E-15 | 520 | 520 |
| PRND         | 0.342534073 | 9.24E-16 | 9.25E-15 | 520 | 480 |
| LOC100126784 | 0.342432186 | 9.43E-16 | 9.43E-15 | 520 | 511 |
| ZSCAN2       | 0.342212646 | 9.86E-16 | 9.86E-15 | 520 | 520 |
| LAPTM5       | 0.342209319 | 9.87E-16 | 9.86E-15 | 520 | 520 |
| CASD1        | 0.342061356 | 1.02E-15 | 1.02E-14 | 520 | 520 |
| CD209        | 0.342033263 | 1.02E-15 | 1.02E-14 | 520 | 520 |
| LSAMP        | 0.342013977 | 1.03E-15 | 1.02E-14 | 520 | 519 |

|          |             |          |          |     |     |
|----------|-------------|----------|----------|-----|-----|
| MYOZ3    | 0.341617436 | 1.11E-15 | 1.11E-14 | 520 | 514 |
| NEDD4    | 0.34150206  | 1.14E-15 | 1.14E-14 | 520 | 520 |
| DBN1     | 0.341276003 | 1.19E-15 | 1.19E-14 | 520 | 520 |
| RNASE2   | 0.341092651 | 1.24E-15 | 1.23E-14 | 520 | 511 |
| PROX1    | 0.341054038 | 1.25E-15 | 1.24E-14 | 520 | 506 |
| OBP2A    | 0.340919724 | 1.28E-15 | 1.27E-14 | 520 | 374 |
| DDIT4L   | 0.340854549 | 1.30E-15 | 1.29E-14 | 520 | 512 |
| TSPAN5   | 0.340839214 | 1.30E-15 | 1.29E-14 | 520 | 520 |
| PLCG1    | 0.340804782 | 1.31E-15 | 1.30E-14 | 520 | 520 |
| DPYSL4   | 0.340618599 | 1.36E-15 | 1.35E-14 | 520 | 518 |
| GPR161   | 0.340439907 | 1.41E-15 | 1.40E-14 | 520 | 520 |
| LMOD2    | 0.34033216  | 1.44E-15 | 1.43E-14 | 520 | 368 |
| SGCG     | 0.340146488 | 1.50E-15 | 1.48E-14 | 520 | 463 |
| ELMO2    | 0.340001135 | 1.54E-15 | 1.52E-14 | 520 | 520 |
| C6orf97  | 0.339903418 | 1.58E-15 | 1.55E-14 | 520 | 519 |
| ESM1     | 0.339821438 | 1.60E-15 | 1.58E-14 | 520 | 520 |
| TTN      | 0.339754629 | 1.62E-15 | 1.60E-14 | 520 | 520 |
| SLC6A1   | 0.339753267 | 1.62E-15 | 1.60E-14 | 520 | 511 |
| ITIH3    | 0.339743023 | 1.63E-15 | 1.60E-14 | 520 | 489 |
| FBN2     | 0.339735857 | 1.63E-15 | 1.60E-14 | 520 | 520 |
| KIAA0355 | 0.339709776 | 1.64E-15 | 1.61E-14 | 520 | 520 |
| DIO3     | 0.339592934 | 1.68E-15 | 1.65E-14 | 520 | 502 |
| TRIM32   | 0.33948027  | 1.72E-15 | 1.68E-14 | 520 | 520 |
| TCTEX1D1 | 0.339456154 | 1.72E-15 | 1.69E-14 | 520 | 520 |
| RSPO2    | 0.339420996 | 1.74E-15 | 1.70E-14 | 520 | 300 |
| YIPF5    | 0.339400897 | 1.74E-15 | 1.71E-14 | 520 | 520 |
| CETP     | 0.339399745 | 1.74E-15 | 1.71E-14 | 520 | 520 |
| ME3      | 0.339341672 | 1.76E-15 | 1.72E-14 | 520 | 520 |
| LDB3     | 0.339277419 | 1.79E-15 | 1.75E-14 | 520 | 517 |
| DNM1     | 0.338882637 | 1.94E-15 | 1.89E-14 | 520 | 520 |
| PIK3R1   | 0.33881703  | 1.96E-15 | 1.91E-14 | 520 | 520 |
| SESTD1   | 0.338796203 | 1.97E-15 | 1.92E-14 | 520 | 520 |
| TRIM44   | 0.338738897 | 1.99E-15 | 1.94E-14 | 520 | 520 |
| FXYD6    | 0.338656771 | 2.03E-15 | 1.97E-14 | 520 | 520 |
| LRRC25   | 0.33859212  | 2.05E-15 | 1.99E-14 | 520 | 520 |
| CLCN4    | 0.338532865 | 2.08E-15 | 2.02E-14 | 520 | 519 |
| KLF12    | 0.338367971 | 2.15E-15 | 2.08E-14 | 520 | 520 |
| CDO1     | 0.338353723 | 2.15E-15 | 2.09E-14 | 520 | 502 |
| TGFBR1   | 0.338311874 | 2.17E-15 | 2.11E-14 | 520 | 520 |
| STC2     | 0.338290495 | 2.18E-15 | 2.11E-14 | 520 | 520 |
| ARHGAP1  | 0.338193196 | 2.22E-15 | 2.15E-14 | 520 | 520 |
| MAN2B2   | 0.338126088 | 2.25E-15 | 2.18E-14 | 520 | 520 |
| SRGN     | 0.33811552  | 2.26E-15 | 2.18E-14 | 520 | 520 |
| ZC3H12B  | 0.338113326 | 2.26E-15 | 2.18E-14 | 520 | 513 |
| BPI      | 0.338029717 | 2.30E-15 | 2.22E-14 | 520 | 370 |
| SLC14A2  | 0.338003291 | 2.31E-15 | 2.23E-14 | 520 | 405 |

|                     |             |          |          |     |     |
|---------------------|-------------|----------|----------|-----|-----|
| SLC6A6              | 0.337930018 | 2.34E-15 | 2.26E-14 | 520 | 520 |
| RAB11FIP3           | 0.337850722 | 2.38E-15 | 2.30E-14 | 520 | 520 |
| LILRB3              | 0.337756286 | 2.43E-15 | 2.34E-14 | 520 | 520 |
| FABP3               | 0.337734167 | 2.44E-15 | 2.35E-14 | 520 | 520 |
| IMPAD1              | 0.337520467 | 2.54E-15 | 2.45E-14 | 520 | 520 |
| METTL7B             | 0.337401106 | 2.61E-15 | 2.50E-14 | 520 | 512 |
| ANO5                | 0.337305597 | 2.66E-15 | 2.55E-14 | 520 | 491 |
| COX7A1              | 0.337288902 | 2.66E-15 | 2.56E-14 | 520 | 520 |
| KCND1               | 0.337281324 | 2.67E-15 | 2.56E-14 | 520 | 520 |
| TTBK2               | 0.337159059 | 2.73E-15 | 2.62E-14 | 520 | 520 |
| GPR141              | 0.337114143 | 2.76E-15 | 2.65E-14 | 520 | 480 |
| KDELC2              | 0.337102648 | 2.77E-15 | 2.65E-14 | 520 | 520 |
| PARVB               | 0.337029263 | 2.81E-15 | 2.69E-14 | 520 | 520 |
| MGAT2               | 0.336905438 | 2.88E-15 | 2.75E-14 | 520 | 520 |
| SDK2                | 0.33682256  | 2.92E-15 | 2.80E-14 | 520 | 520 |
| SHF                 | 0.336665149 | 3.02E-15 | 2.88E-14 | 520 | 520 |
| STAB1               | 0.336459051 | 3.14E-15 | 3.00E-14 | 520 | 520 |
| CAV3                | 0.336447744 | 3.15E-15 | 3.01E-14 | 520 | 309 |
| CD4                 | 0.336440191 | 3.16E-15 | 3.01E-14 | 520 | 520 |
| PIK3CG              | 0.33637583  | 3.20E-15 | 3.05E-14 | 520 | 518 |
| CPXM2               | 0.336294525 | 3.25E-15 | 3.10E-14 | 520 | 520 |
| IGF2R               | 0.336202915 | 3.31E-15 | 3.15E-14 | 520 | 520 |
| EPS8                | 0.336113154 | 3.37E-15 | 3.21E-14 | 520 | 520 |
| TWIST2              | 0.336099055 | 3.38E-15 | 3.21E-14 | 520 | 520 |
| TRIM8               | 0.335814058 | 3.58E-15 | 3.40E-14 | 520 | 520 |
| SMARCD3             | 0.335811698 | 3.58E-15 | 3.40E-14 | 520 | 520 |
| LCP2                | 0.335789092 | 3.59E-15 | 3.41E-14 | 520 | 520 |
| HSD17B14            | 0.335760527 | 3.61E-15 | 3.43E-14 | 520 | 520 |
| TXNDC5              | 0.335597641 | 3.73E-15 | 3.54E-14 | 520 | 520 |
| DIO2                | 0.33545065  | 3.84E-15 | 3.63E-14 | 520 | 520 |
| PLA2G7              | 0.335369904 | 3.91E-15 | 3.69E-14 | 520 | 520 |
| L1CAM               | 0.335321505 | 3.94E-15 | 3.72E-14 | 520 | 520 |
| MUM1L1              | 0.335199091 | 4.04E-15 | 3.81E-14 | 520 | 462 |
| BMF                 | 0.335192312 | 4.05E-15 | 3.81E-14 | 520 | 520 |
| ZNF415              | 0.335178046 | 4.06E-15 | 3.82E-14 | 520 | 517 |
| MAP9                | 0.335154587 | 4.08E-15 | 3.84E-14 | 520 | 519 |
| SRGAP2              | 0.335140749 | 4.09E-15 | 3.85E-14 | 520 | 520 |
| MAP3K2              | 0.335121939 | 4.10E-15 | 3.86E-14 | 520 | 520 |
| TRPC6               | 0.335093451 | 4.13E-15 | 3.88E-14 | 520 | 520 |
| CACNG1              | 0.335067578 | 4.15E-15 | 3.90E-14 | 520 | 378 |
| ITFG1               | 0.335048544 | 4.16E-15 | 3.91E-14 | 520 | 520 |
| ICAM1               | 0.334951779 | 4.24E-15 | 3.98E-14 | 520 | 520 |
| RARB                | 0.334835771 | 4.34E-15 | 4.07E-14 | 520 | 520 |
| FAM115A             | 0.33480306  | 4.37E-15 | 4.10E-14 | 520 | 519 |
| LIMS3-<br>LOC440895 | 0.334670558 | 4.49E-15 | 4.20E-14 | 520 | 520 |



|              |             |          |          |     |     |
|--------------|-------------|----------|----------|-----|-----|
| ABCA9        | 0.334612352 | 4.54E-15 | 4.25E-14 | 520 | 518 |
| SPRED2       | 0.334600631 | 4.55E-15 | 4.26E-14 | 520 | 520 |
| ITPR1        | 0.334403434 | 4.73E-15 | 4.42E-14 | 520 | 520 |
| PDGFA        | 0.334187832 | 4.94E-15 | 4.61E-14 | 520 | 520 |
| ARAP3        | 0.334044868 | 5.08E-15 | 4.73E-14 | 520 | 520 |
| PCDHB15      | 0.334021124 | 5.10E-15 | 4.75E-14 | 520 | 519 |
| PITX3        | 0.33398797  | 5.14E-15 | 4.78E-14 | 520 | 492 |
| NUDT10       | 0.333879282 | 5.25E-15 | 4.88E-14 | 520 | 511 |
| IDS          | 0.333877499 | 5.25E-15 | 4.88E-14 | 520 | 520 |
| COTL1        | 0.33379742  | 5.33E-15 | 4.96E-14 | 520 | 520 |
| H6PD         | 0.333473998 | 5.68E-15 | 5.28E-14 | 520 | 520 |
| UGGT1        | 0.333444092 | 5.72E-15 | 5.31E-14 | 520 | 520 |
| MKL1         | 0.333411243 | 5.76E-15 | 5.34E-14 | 520 | 520 |
| IVNS1ABP     | 0.333359341 | 5.81E-15 | 5.39E-14 | 520 | 520 |
| SOHLH2       | 0.333354392 | 5.82E-15 | 5.40E-14 | 520 | 466 |
| LAYN         | 0.333158637 | 6.05E-15 | 5.60E-14 | 520 | 520 |
| IGF1R        | 0.333108726 | 6.11E-15 | 5.66E-14 | 520 | 520 |
| GPRC5B       | 0.333088977 | 6.13E-15 | 5.68E-14 | 520 | 519 |
| GABARAPL1    | 0.333028938 | 6.21E-15 | 5.74E-14 | 520 | 520 |
| FAM124B      | 0.333017235 | 6.22E-15 | 5.75E-14 | 520 | 517 |
| PARD3B       | 0.332943766 | 6.31E-15 | 5.83E-14 | 520 | 517 |
| STEAP2       | 0.3329245   | 6.33E-15 | 5.85E-14 | 520 | 520 |
| TTC3         | 0.332824116 | 6.46E-15 | 5.96E-14 | 520 | 520 |
| C1orf54      | 0.332772073 | 6.53E-15 | 6.02E-14 | 520 | 520 |
| LILRA2       | 0.332606402 | 6.74E-15 | 6.21E-14 | 520 | 519 |
| RAB31        | 0.332568075 | 6.79E-15 | 6.26E-14 | 520 | 520 |
| KBTBD11      | 0.332539585 | 6.83E-15 | 6.29E-14 | 520 | 519 |
| TPM4         | 0.332458085 | 6.94E-15 | 6.39E-14 | 520 | 520 |
| PGM5         | 0.332408424 | 7.01E-15 | 6.45E-14 | 520 | 520 |
| DTX4         | 0.332353371 | 7.09E-15 | 6.52E-14 | 520 | 520 |
| AMZ1         | 0.332272604 | 7.20E-15 | 6.62E-14 | 520 | 517 |
| PRKAG3       | 0.332220971 | 7.27E-15 | 6.68E-14 | 520 | 386 |
| PTPRR        | 0.332198658 | 7.31E-15 | 6.71E-14 | 520 | 510 |
| FCGR2C       | 0.332139085 | 7.39E-15 | 6.78E-14 | 520 | 519 |
| KDEL2        | 0.332043838 | 7.53E-15 | 6.91E-14 | 520 | 520 |
| MYO1C        | 0.331922833 | 7.71E-15 | 7.07E-14 | 520 | 520 |
| KIFAP3       | 0.331859995 | 7.81E-15 | 7.15E-14 | 520 | 520 |
| ADCYAP1R1    | 0.331775296 | 7.94E-15 | 7.27E-14 | 520 | 383 |
| FAM171A2     | 0.331611131 | 8.20E-15 | 7.50E-14 | 520 | 520 |
| INSR         | 0.331536538 | 8.32E-15 | 7.60E-14 | 520 | 520 |
| SLC35F1      | 0.331213626 | 8.86E-15 | 8.08E-14 | 520 | 479 |
| CLDN14       | 0.331138251 | 8.99E-15 | 8.19E-14 | 520 | 515 |
| LPXN         | 0.331091969 | 9.08E-15 | 8.27E-14 | 520 | 520 |
| NBAS         | 0.331005094 | 9.23E-15 | 8.40E-14 | 520 | 520 |
| CTDSP2       | 0.330949785 | 9.33E-15 | 8.49E-14 | 520 | 520 |
| LOC100270710 | 0.33079095  | 9.63E-15 | 8.75E-14 | 520 | 520 |

|           |             |          |          |     |     |
|-----------|-------------|----------|----------|-----|-----|
| FAM198A   | 0.330651597 | 9.89E-15 | 8.98E-14 | 520 | 516 |
| F10       | 0.330621869 | 9.95E-15 | 9.03E-14 | 520 | 515 |
| JAKMIP2   | 0.330586753 | 1.00E-14 | 9.09E-14 | 520 | 513 |
| JPH3      | 0.330480879 | 1.02E-14 | 9.28E-14 | 520 | 503 |
| TFEC      | 0.330477261 | 1.02E-14 | 9.28E-14 | 520 | 520 |
| SLITRK2   | 0.330393966 | 1.04E-14 | 9.43E-14 | 520 | 488 |
| CALCRL    | 0.330286724 | 1.06E-14 | 9.62E-14 | 520 | 520 |
| DHH       | 0.330258408 | 1.07E-14 | 9.67E-14 | 520 | 468 |
| MAGED4    | 0.33025626  | 1.07E-14 | 9.67E-14 | 520 | 520 |
| APH1B     | 0.33025238  | 1.07E-14 | 9.67E-14 | 520 | 520 |
| NHS       | 0.330249815 | 1.07E-14 | 9.67E-14 | 520 | 520 |
| FMN1      | 0.33021291  | 1.08E-14 | 9.74E-14 | 520 | 514 |
| NKX6-1    | 0.330013757 | 1.12E-14 | 1.01E-13 | 520 | 467 |
| CD300LB   | 0.330000904 | 1.12E-14 | 1.01E-13 | 520 | 516 |
| PLCL2     | 0.329961811 | 1.13E-14 | 1.02E-13 | 520 | 520 |
| PTENP1    | 0.329958358 | 1.13E-14 | 1.02E-13 | 520 | 520 |
| GALNS     | 0.32993462  | 1.14E-14 | 1.03E-13 | 520 | 520 |
| SLC6A12   | 0.329759826 | 1.18E-14 | 1.06E-13 | 520 | 518 |
| SLC17A9   | 0.329721546 | 1.19E-14 | 1.07E-13 | 520 | 520 |
| EYA1      | 0.329655937 | 1.20E-14 | 1.08E-13 | 520 | 502 |
| MAN2A1    | 0.329641848 | 1.20E-14 | 1.08E-13 | 520 | 520 |
| ANKRD50   | 0.329564505 | 1.22E-14 | 1.10E-13 | 520 | 520 |
| PLCB1     | 0.329539946 | 1.23E-14 | 1.10E-13 | 520 | 520 |
| CD163L1   | 0.329414553 | 1.26E-14 | 1.13E-13 | 520 | 520 |
| TTYH2     | 0.329363919 | 1.27E-14 | 1.14E-13 | 520 | 520 |
| ARID5A    | 0.329331594 | 1.28E-14 | 1.15E-13 | 520 | 520 |
| PIP4K2B   | 0.329285335 | 1.29E-14 | 1.16E-13 | 520 | 520 |
| TNFRSF12A | 0.329242652 | 1.30E-14 | 1.17E-13 | 520 | 520 |
| DNALI1    | 0.329234515 | 1.30E-14 | 1.17E-13 | 520 | 519 |
| LOC344595 | 0.329231212 | 1.30E-14 | 1.17E-13 | 520 | 520 |
| CCDC102A  | 0.329175977 | 1.32E-14 | 1.18E-13 | 520 | 520 |
| PCSK1     | 0.329121893 | 1.33E-14 | 1.19E-13 | 520 | 518 |
| SETBP1    | 0.329099621 | 1.34E-14 | 1.19E-13 | 520 | 520 |
| PDE5A     | 0.329091051 | 1.34E-14 | 1.20E-13 | 520 | 520 |
| SYNPO2    | 0.328997772 | 1.36E-14 | 1.22E-13 | 520 | 520 |
| TMEM158   | 0.328926346 | 1.38E-14 | 1.23E-13 | 520 | 520 |
| ADAM33    | 0.328861707 | 1.40E-14 | 1.25E-13 | 520 | 520 |
| SH3BGR1   | 0.328463275 | 1.51E-14 | 1.35E-13 | 520 | 520 |
| DOCK1     | 0.32843658  | 1.52E-14 | 1.35E-13 | 520 | 520 |
| SNX19     | 0.328222034 | 1.59E-14 | 1.41E-13 | 520 | 520 |
| EBF3      | 0.328133399 | 1.61E-14 | 1.43E-13 | 520 | 520 |
| NHEDC2    | 0.32804336  | 1.64E-14 | 1.46E-13 | 520 | 520 |
| BAHCC1    | 0.327974553 | 1.66E-14 | 1.47E-13 | 520 | 520 |
| TNIK      | 0.327922116 | 1.68E-14 | 1.49E-13 | 520 | 519 |
| SND1      | 0.32784202  | 1.71E-14 | 1.51E-13 | 520 | 520 |
| XIRP2     | 0.327798812 | 1.72E-14 | 1.52E-13 | 520 | 409 |

|         |             |          |          |     |     |
|---------|-------------|----------|----------|-----|-----|
| GRAMD1B | 0.327755852 | 1.74E-14 | 1.53E-13 | 520 | 519 |
| RETN    | 0.327751046 | 1.74E-14 | 1.53E-13 | 520 | 398 |
| ECSCR   | 0.327625725 | 1.78E-14 | 1.57E-13 | 520 | 520 |
| GRB10   | 0.327587922 | 1.79E-14 | 1.58E-13 | 520 | 520 |
| MINPP1  | 0.327119538 | 1.96E-14 | 1.73E-13 | 520 | 520 |
| TES     | 0.327063715 | 1.98E-14 | 1.75E-13 | 520 | 520 |
| IGLON5  | 0.327038774 | 1.99E-14 | 1.76E-13 | 520 | 520 |
| LAMC3   | 0.326908837 | 2.04E-14 | 1.80E-13 | 520 | 520 |
| NPY6R   | 0.326852609 | 2.07E-14 | 1.82E-13 | 520 | 334 |
| SVEP1   | 0.326781152 | 2.09E-14 | 1.84E-13 | 520 | 520 |
| TRIM46  | 0.326565207 | 2.18E-14 | 1.92E-13 | 520 | 520 |
| BMP5    | 0.326426034 | 2.24E-14 | 1.97E-13 | 520 | 326 |
| VAT1    | 0.326377305 | 2.26E-14 | 1.99E-13 | 520 | 520 |
| DNAL1   | 0.326339686 | 2.28E-14 | 2.00E-13 | 520 | 520 |
| MMP10   | 0.32617846  | 2.35E-14 | 2.06E-13 | 520 | 520 |
| SHANK2  | 0.326128886 | 2.37E-14 | 2.08E-13 | 520 | 518 |
| FCER1G  | 0.326105199 | 2.39E-14 | 2.09E-13 | 520 | 520 |
| VTN     | 0.326000724 | 2.43E-14 | 2.13E-13 | 520 | 508 |
| MNDA    | 0.32597533  | 2.45E-14 | 2.14E-13 | 520 | 520 |
| IP6K3   | 0.325967155 | 2.45E-14 | 2.14E-13 | 520 | 477 |
| ARSJ    | 0.325905382 | 2.48E-14 | 2.17E-13 | 520 | 520 |
| TTC7B   | 0.325842537 | 2.51E-14 | 2.19E-13 | 520 | 520 |
| SDS     | 0.325647734 | 2.60E-14 | 2.27E-13 | 520 | 520 |
| HAVCR2  | 0.32562745  | 2.61E-14 | 2.28E-13 | 520 | 520 |
| NAV1    | 0.325616782 | 2.62E-14 | 2.28E-13 | 520 | 520 |
| VPS13C  | 0.325436174 | 2.71E-14 | 2.36E-13 | 520 | 520 |
| C3      | 0.325299307 | 2.78E-14 | 2.42E-13 | 520 | 520 |
| FGF18   | 0.325203164 | 2.84E-14 | 2.47E-13 | 520 | 471 |
| PPP3CA  | 0.325164966 | 2.86E-14 | 2.48E-13 | 520 | 520 |
| PANX1   | 0.324885466 | 3.01E-14 | 2.62E-13 | 520 | 520 |
| HFE2    | 0.324878419 | 3.02E-14 | 2.62E-13 | 520 | 307 |
| GPR137B | 0.324873208 | 3.02E-14 | 2.62E-13 | 520 | 520 |
| MYL1    | 0.324871785 | 3.02E-14 | 2.62E-13 | 520 | 368 |
| MOBKL1A | 0.324870563 | 3.02E-14 | 2.62E-13 | 520 | 520 |
| TLR8    | 0.324740441 | 3.10E-14 | 2.68E-13 | 520 | 520 |
| PIGT    | 0.324702091 | 3.12E-14 | 2.70E-13 | 520 | 520 |
| ZBTB20  | 0.324595634 | 3.18E-14 | 2.76E-13 | 520 | 513 |
| SUSD1   | 0.324588572 | 3.19E-14 | 2.76E-13 | 520 | 520 |
| TLL2    | 0.324572158 | 3.20E-14 | 2.77E-13 | 520 | 517 |
| C1QC    | 0.324553305 | 3.21E-14 | 2.77E-13 | 520 | 520 |
| ADAT1   | 0.324537493 | 3.22E-14 | 2.78E-13 | 520 | 520 |
| ZHX3    | 0.324490852 | 3.25E-14 | 2.80E-13 | 520 | 520 |
| EGR2    | 0.324233002 | 3.41E-14 | 2.94E-13 | 520 | 520 |
| MANBA   | 0.324207532 | 3.43E-14 | 2.95E-13 | 520 | 520 |
| DUSP3   | 0.324139812 | 3.47E-14 | 2.99E-13 | 520 | 520 |
| CTNNA3  | 0.324104982 | 3.50E-14 | 3.01E-13 | 520 | 302 |

|          |             |          |          |     |     |
|----------|-------------|----------|----------|-----|-----|
| LRR4C    | 0.324059533 | 3.53E-14 | 3.03E-13 | 520 | 447 |
| C3orf59  | 0.323804891 | 3.70E-14 | 3.18E-13 | 520 | 520 |
| PXK      | 0.323705724 | 3.77E-14 | 3.24E-13 | 520 | 520 |
| MEG3     | 0.323629019 | 3.83E-14 | 3.28E-13 | 520 | 520 |
| TMEM140  | 0.323365265 | 4.03E-14 | 3.45E-13 | 520 | 520 |
| EXOC3L2  | 0.323359352 | 4.03E-14 | 3.45E-13 | 520 | 520 |
| CACNB1   | 0.32303523  | 4.29E-14 | 3.67E-13 | 520 | 520 |
| GPR183   | 0.322947656 | 4.36E-14 | 3.73E-13 | 520 | 520 |
| PRG4     | 0.322913016 | 4.39E-14 | 3.75E-13 | 520 | 511 |
| PTGFRN   | 0.322866808 | 4.42E-14 | 3.78E-13 | 520 | 520 |
| ZNF93    | 0.322630663 | 4.63E-14 | 3.95E-13 | 520 | 519 |
| PHTF1    | 0.322589845 | 4.66E-14 | 3.98E-13 | 520 | 520 |
| KLKP1    | 0.322342112 | 4.89E-14 | 4.17E-13 | 520 | 159 |
| INPP4B   | 0.322338339 | 4.89E-14 | 4.17E-13 | 520 | 520 |
| CHST3    | 0.322328639 | 4.90E-14 | 4.17E-13 | 520 | 520 |
| STK17B   | 0.322288325 | 4.94E-14 | 4.20E-13 | 520 | 520 |
| USP51    | 0.322271622 | 4.95E-14 | 4.21E-13 | 520 | 509 |
| TRIM63   | 0.322222995 | 5.00E-14 | 4.25E-13 | 520 | 445 |
| ASPH     | 0.322063913 | 5.15E-14 | 4.38E-13 | 520 | 520 |
| SEC14L1  | 0.322063134 | 5.15E-14 | 4.38E-13 | 520 | 520 |
| SLFN11   | 0.321859245 | 5.36E-14 | 4.54E-13 | 520 | 520 |
| APOE     | 0.321839086 | 5.38E-14 | 4.56E-13 | 520 | 520 |
| XYLT2    | 0.321800513 | 5.41E-14 | 4.59E-13 | 520 | 520 |
| USP11    | 0.321685953 | 5.53E-14 | 4.69E-13 | 520 | 520 |
| TMEM121  | 0.321609488 | 5.61E-14 | 4.75E-13 | 520 | 520 |
| KIAA1549 | 0.321458499 | 5.78E-14 | 4.89E-13 | 520 | 520 |
| MYH11    | 0.321387235 | 5.85E-14 | 4.95E-13 | 520 | 520 |
| CD68     | 0.321340688 | 5.91E-14 | 4.99E-13 | 520 | 520 |
| CCPG1    | 0.321326092 | 5.92E-14 | 5.00E-13 | 520 | 520 |
| LCP1     | 0.32120264  | 6.06E-14 | 5.11E-13 | 520 | 520 |
| ACAA2    | 0.321175667 | 6.09E-14 | 5.13E-13 | 520 | 520 |
| CR1      | 0.321122835 | 6.15E-14 | 5.18E-13 | 520 | 519 |
| SARDH    | 0.321114625 | 6.16E-14 | 5.18E-13 | 520 | 520 |
| BBS9     | 0.321011113 | 6.28E-14 | 5.28E-13 | 520 | 520 |
| RNF115   | 0.320967793 | 6.34E-14 | 5.33E-13 | 520 | 520 |
| PAFAH1B2 | 0.320867927 | 6.46E-14 | 5.42E-13 | 520 | 520 |
| CMYA5    | 0.320828581 | 6.50E-14 | 5.46E-13 | 520 | 520 |
| KIAA0196 | 0.32081906  | 6.52E-14 | 5.47E-13 | 520 | 520 |
| TMOD2    | 0.320683684 | 6.68E-14 | 5.60E-13 | 520 | 520 |
| FAM176B  | 0.320659161 | 6.71E-14 | 5.63E-13 | 520 | 520 |
| MYL6P    | 0.320341198 | 7.13E-14 | 5.97E-13 | 520 | 464 |
| VWF      | 0.320316473 | 7.16E-14 | 5.99E-13 | 520 | 520 |
| PHTF2    | 0.320268123 | 7.23E-14 | 6.04E-13 | 520 | 520 |
| CSRP3    | 0.320266854 | 7.23E-14 | 6.04E-13 | 520 | 346 |
| NBPF15   | 0.320128793 | 7.42E-14 | 6.20E-13 | 520 | 520 |
| CADM1    | 0.320027634 | 7.56E-14 | 6.31E-13 | 520 | 520 |

|          |             |          |          |     |     |
|----------|-------------|----------|----------|-----|-----|
| KBTBD5   | 0.319984548 | 7.62E-14 | 6.36E-13 | 520 | 321 |
| PADI2    | 0.319949645 | 7.67E-14 | 6.39E-13 | 520 | 520 |
| ARHGEF2  | 0.319833008 | 7.84E-14 | 6.53E-13 | 520 | 520 |
| HS2ST1   | 0.319750176 | 7.97E-14 | 6.63E-13 | 520 | 520 |
| WT1      | 0.319634564 | 8.14E-14 | 6.77E-13 | 520 | 347 |
| MYO18B   | 0.319554263 | 8.26E-14 | 6.87E-13 | 520 | 493 |
| EHD3     | 0.319520126 | 8.32E-14 | 6.91E-13 | 520 | 520 |
| AKAP6    | 0.319481098 | 8.38E-14 | 6.95E-13 | 520 | 520 |
| MEX3A    | 0.319319501 | 8.63E-14 | 7.16E-13 | 520 | 520 |
| CDC27    | 0.319313363 | 8.64E-14 | 7.16E-13 | 520 | 520 |
| EGFL6    | 0.319249372 | 8.75E-14 | 7.24E-13 | 520 | 520 |
| JMJD1C   | 0.319236509 | 8.77E-14 | 7.26E-13 | 520 | 520 |
| PICALM   | 0.319151083 | 8.91E-14 | 7.37E-13 | 520 | 520 |
| TGFB1    | 0.319050216 | 9.08E-14 | 7.51E-13 | 520 | 520 |
| KLF10    | 0.31902689  | 9.12E-14 | 7.54E-13 | 520 | 520 |
| GPR84    | 0.319016004 | 9.14E-14 | 7.55E-13 | 520 | 520 |
| MGAT5    | 0.318685646 | 9.72E-14 | 8.02E-13 | 520 | 520 |
| NBPF16   | 0.318683125 | 9.73E-14 | 8.02E-13 | 520 | 509 |
| C13orf15 | 0.318586117 | 9.90E-14 | 8.16E-13 | 520 | 520 |
| PCDHAC2  | 0.318572181 | 9.93E-14 | 8.18E-13 | 520 | 391 |
| GOLIM4   | 0.318567432 | 9.94E-14 | 8.19E-13 | 520 | 520 |
| ACSM5    | 0.318251143 | 1.05E-13 | 8.68E-13 | 520 | 448 |
| MTR      | 0.318239187 | 1.06E-13 | 8.69E-13 | 520 | 520 |
| SLC13A3  | 0.318233093 | 1.06E-13 | 8.70E-13 | 520 | 519 |
| DYNC1H1  | 0.318188453 | 1.07E-13 | 8.77E-13 | 520 | 520 |
| RTN4RL2  | 0.318046868 | 1.10E-13 | 8.99E-13 | 520 | 517 |
| MAP4     | 0.318020869 | 1.10E-13 | 9.03E-13 | 520 | 520 |
| CLDN11   | 0.31801454  | 1.10E-13 | 9.04E-13 | 520 | 517 |
| CCL2     | 0.317903599 | 1.12E-13 | 9.22E-13 | 520 | 520 |
| PARK2    | 0.317870891 | 1.13E-13 | 9.27E-13 | 520 | 518 |
| VGLL4    | 0.317752403 | 1.16E-13 | 9.47E-13 | 520 | 520 |
| MYH3     | 0.317688292 | 1.17E-13 | 9.58E-13 | 520 | 520 |
| KCNB1    | 0.31765608  | 1.18E-13 | 9.63E-13 | 520 | 382 |
| SNX29    | 0.317638261 | 1.18E-13 | 9.66E-13 | 520 | 520 |
| VOPP1    | 0.317455135 | 1.22E-13 | 9.99E-13 | 520 | 520 |
| BCORL1   | 0.317238332 | 1.27E-13 | 1.04E-12 | 520 | 520 |
| RCN1     | 0.317195768 | 1.28E-13 | 1.05E-12 | 520 | 520 |
| GAS7     | 0.31716312  | 1.29E-13 | 1.05E-12 | 520 | 520 |
| SBF2     | 0.317136375 | 1.30E-13 | 1.06E-12 | 520 | 520 |
| B4GALNT1 | 0.317035811 | 1.32E-13 | 1.08E-12 | 520 | 520 |
| IFNAR2   | 0.316971282 | 1.34E-13 | 1.09E-12 | 520 | 520 |
| NEU3     | 0.316934473 | 1.35E-13 | 1.10E-12 | 520 | 518 |
| PPAP2B   | 0.316852468 | 1.37E-13 | 1.11E-12 | 520 | 520 |
| SERPINE2 | 0.316768362 | 1.39E-13 | 1.13E-12 | 520 | 520 |
| NBPF9    | 0.316711976 | 1.40E-13 | 1.14E-12 | 520 | 520 |
| PRKAR1A  | 0.316624417 | 1.43E-13 | 1.16E-12 | 520 | 520 |

|          |             |          |          |     |     |
|----------|-------------|----------|----------|-----|-----|
| ITGAX    | 0.316584855 | 1.44E-13 | 1.17E-12 | 520 | 520 |
| SSTR1    | 0.316531058 | 1.45E-13 | 1.18E-12 | 520 | 387 |
| LRRC2    | 0.316276936 | 1.52E-13 | 1.23E-12 | 520 | 491 |
| CABP4    | 0.316150052 | 1.56E-13 | 1.26E-12 | 520 | 483 |
| MT1A     | 0.316101533 | 1.57E-13 | 1.27E-12 | 520 | 455 |
| TP53BP1  | 0.316072771 | 1.58E-13 | 1.28E-12 | 520 | 520 |
| SSTR2    | 0.316053648 | 1.59E-13 | 1.28E-12 | 520 | 518 |
| DNAJB4   | 0.316031348 | 1.59E-13 | 1.29E-12 | 520 | 520 |
| ZNF626   | 0.315954272 | 1.61E-13 | 1.30E-12 | 520 | 517 |
| F5       | 0.315920629 | 1.62E-13 | 1.31E-12 | 520 | 520 |
| BAG2     | 0.315911105 | 1.63E-13 | 1.31E-12 | 520 | 520 |
| PNMA6A   | 0.315879123 | 1.64E-13 | 1.32E-12 | 520 | 517 |
| ENTPD7   | 0.315435027 | 1.78E-13 | 1.43E-12 | 520 | 520 |
| CLTCL1   | 0.315417178 | 1.78E-13 | 1.43E-12 | 520 | 520 |
| CCDC8    | 0.315415932 | 1.78E-13 | 1.43E-12 | 520 | 520 |
| MBD5     | 0.315381613 | 1.79E-13 | 1.44E-12 | 520 | 520 |
| ATP6V1G2 | 0.315372903 | 1.80E-13 | 1.44E-12 | 520 | 508 |
| FLJ44054 | 0.315335624 | 1.81E-13 | 1.45E-12 | 520 | 263 |
| NRAP     | 0.31531245  | 1.82E-13 | 1.46E-12 | 520 | 406 |
| SKI      | 0.31521652  | 1.85E-13 | 1.48E-12 | 520 | 520 |
| DTX1     | 0.315188775 | 1.86E-13 | 1.49E-12 | 520 | 520 |
| C13orf29 | 0.315180025 | 1.86E-13 | 1.49E-12 | 520 | 520 |
| SLCO2A1  | 0.315140958 | 1.88E-13 | 1.50E-12 | 520 | 520 |
| COPB1    | 0.315109036 | 1.89E-13 | 1.51E-12 | 520 | 520 |
| CHI3L1   | 0.315102073 | 1.89E-13 | 1.51E-12 | 520 | 520 |
| ZNF454   | 0.315075215 | 1.90E-13 | 1.52E-12 | 520 | 487 |
| SMPX     | 0.315060933 | 1.90E-13 | 1.52E-12 | 520 | 397 |
| TNNI1    | 0.315020634 | 1.92E-13 | 1.53E-12 | 520 | 520 |
| KIAA0040 | 0.314953103 | 1.94E-13 | 1.55E-12 | 520 | 520 |
| PTPRJ    | 0.314695531 | 2.04E-13 | 1.63E-12 | 520 | 520 |
| LRRC14B  | 0.31466689  | 2.05E-13 | 1.63E-12 | 520 | 365 |
| SEMA3A   | 0.31453354  | 2.10E-13 | 1.67E-12 | 520 | 520 |
| RILPL1   | 0.314419408 | 2.14E-13 | 1.71E-12 | 520 | 520 |
| RRBP1    | 0.314383508 | 2.16E-13 | 1.72E-12 | 520 | 520 |
| B4GALT1  | 0.314317489 | 2.18E-13 | 1.74E-12 | 520 | 520 |
| TNFSF8   | 0.314147154 | 2.25E-13 | 1.79E-12 | 520 | 508 |
| SPI1     | 0.314142868 | 2.25E-13 | 1.79E-12 | 520 | 520 |
| POPDC3   | 0.314115831 | 2.27E-13 | 1.80E-12 | 520 | 516 |
| HPCAL4   | 0.313826175 | 2.39E-13 | 1.90E-12 | 520 | 494 |
| ELMOD1   | 0.313779632 | 2.41E-13 | 1.91E-12 | 520 | 478 |
| DAB1     | 0.313765659 | 2.42E-13 | 1.92E-12 | 520 | 349 |
| SYT3     | 0.31376256  | 2.42E-13 | 1.92E-12 | 520 | 453 |
| KCNN3    | 0.313711301 | 2.44E-13 | 1.93E-12 | 520 | 520 |
| MYOD1    | 0.313616405 | 2.48E-13 | 1.97E-12 | 520 | 296 |
| KMO      | 0.313602944 | 2.49E-13 | 1.97E-12 | 520 | 520 |
| PTGER4   | 0.31357755  | 2.50E-13 | 1.98E-12 | 520 | 520 |

|          |             |          |          |     |     |
|----------|-------------|----------|----------|-----|-----|
| HEXB     | 0.313508255 | 2.53E-13 | 2.00E-12 | 520 | 520 |
| ETV5     | 0.313442649 | 2.56E-13 | 2.02E-12 | 520 | 520 |
| MEGF8    | 0.313428033 | 2.57E-13 | 2.03E-12 | 520 | 520 |
| LPPR5    | 0.313300415 | 2.63E-13 | 2.07E-12 | 520 | 412 |
| SLC38A7  | 0.313243643 | 2.66E-13 | 2.10E-12 | 520 | 520 |
| C1QTNF2  | 0.313121809 | 2.72E-13 | 2.14E-12 | 520 | 520 |
| NAALADL1 | 0.313096322 | 2.73E-13 | 2.15E-12 | 520 | 520 |
| LIMCH1   | 0.313067559 | 2.75E-13 | 2.16E-12 | 520 | 520 |
| LRRC33   | 0.312984399 | 2.79E-13 | 2.19E-12 | 520 | 519 |
| ALKBH8   | 0.312952123 | 2.80E-13 | 2.20E-12 | 520 | 520 |
| MYH4     | 0.312826383 | 2.87E-13 | 2.25E-12 | 520 | 270 |
| AQP1     | 0.312796809 | 2.88E-13 | 2.26E-12 | 520 | 520 |
| FAM48B2  | 0.312611112 | 2.98E-13 | 2.34E-12 | 520 | 190 |
| ATF7     | 0.312570358 | 3.01E-13 | 2.35E-12 | 520 | 520 |
| NRSN2    | 0.312428867 | 3.09E-13 | 2.41E-12 | 520 | 520 |
| DOCK2    | 0.312395134 | 3.10E-13 | 2.43E-12 | 520 | 520 |
| ELFN2    | 0.312070629 | 3.29E-13 | 2.57E-12 | 520 | 506 |
| BMP8B    | 0.312047137 | 3.31E-13 | 2.58E-12 | 520 | 520 |
| SIGLEC1  | 0.31191353  | 3.39E-13 | 2.64E-12 | 520 | 520 |
| OLFM2    | 0.311890466 | 3.40E-13 | 2.65E-12 | 520 | 520 |
| IRS2     | 0.311850421 | 3.43E-13 | 2.67E-12 | 520 | 520 |
| WFS1     | 0.311805211 | 3.46E-13 | 2.69E-12 | 520 | 520 |
| FAM55C   | 0.311804511 | 3.46E-13 | 2.69E-12 | 520 | 520 |
| ZNF788   | 0.311691805 | 3.53E-13 | 2.75E-12 | 520 | 519 |
| CPD      | 0.311601054 | 3.59E-13 | 2.79E-12 | 520 | 520 |
| FGR      | 0.311492577 | 3.66E-13 | 2.85E-12 | 520 | 520 |
| ITGB1BP3 | 0.311463096 | 3.68E-13 | 2.86E-12 | 520 | 288 |
| ZNF221   | 0.311351161 | 3.75E-13 | 2.91E-12 | 520 | 517 |
| HSPB6    | 0.311330159 | 3.77E-13 | 2.92E-12 | 520 | 520 |
| LAMC2    | 0.311272445 | 3.81E-13 | 2.95E-12 | 520 | 520 |
| APOBEC2  | 0.311254747 | 3.82E-13 | 2.96E-12 | 520 | 479 |
| SLC6A17  | 0.311224497 | 3.84E-13 | 2.98E-12 | 520 | 514 |
| KIAA1377 | 0.311206753 | 3.85E-13 | 2.98E-12 | 520 | 519 |
| DISP2    | 0.311144148 | 3.90E-13 | 3.02E-12 | 520 | 520 |
| DSG2     | 0.310930502 | 4.05E-13 | 3.14E-12 | 520 | 520 |
| FAM69A   | 0.310751483 | 4.19E-13 | 3.24E-12 | 520 | 520 |
| RIN3     | 0.310678569 | 4.24E-13 | 3.28E-12 | 520 | 520 |
| SPATA8   | 0.310635821 | 4.27E-13 | 3.30E-12 | 520 | 163 |
| PLEC     | 0.310461426 | 4.41E-13 | 3.40E-12 | 520 | 520 |
| HCK      | 0.310318331 | 4.53E-13 | 3.49E-12 | 520 | 520 |
| ATP11A   | 0.310181984 | 4.64E-13 | 3.57E-12 | 520 | 520 |
| SH3PXD2A | 0.310123317 | 4.69E-13 | 3.61E-12 | 520 | 520 |
| BEAN     | 0.310007664 | 4.79E-13 | 3.69E-12 | 520 | 517 |
| SLC35B2  | 0.309983408 | 4.81E-13 | 3.70E-12 | 520 | 520 |
| TYROBP   | 0.309898222 | 4.88E-13 | 3.75E-12 | 520 | 520 |
| ST3GAL1  | 0.309896688 | 4.89E-13 | 3.75E-12 | 520 | 520 |

|           |             |          |          |     |     |
|-----------|-------------|----------|----------|-----|-----|
| GDNF      | 0.309688848 | 5.07E-13 | 3.90E-12 | 520 | 403 |
| SIGLEC5   | 0.309565449 | 5.19E-13 | 3.98E-12 | 520 | 517 |
| TMEM200B  | 0.309419928 | 5.33E-13 | 4.08E-12 | 520 | 519 |
| SHC4      | 0.309416291 | 5.33E-13 | 4.08E-12 | 520 | 515 |
| KCTD7     | 0.309390819 | 5.35E-13 | 4.10E-12 | 520 | 520 |
| ZNF22     | 0.309373087 | 5.37E-13 | 4.11E-12 | 520 | 520 |
| ID3       | 0.309318996 | 5.42E-13 | 4.15E-12 | 520 | 520 |
| OSGIN2    | 0.309279915 | 5.46E-13 | 4.18E-12 | 520 | 520 |
| C14orf132 | 0.309268861 | 5.47E-13 | 4.18E-12 | 520 | 520 |
| MYOZ2     | 0.309206867 | 5.53E-13 | 4.23E-12 | 520 | 410 |
| SH3BP5    | 0.309103105 | 5.64E-13 | 4.31E-12 | 520 | 520 |
| GIMAP6    | 0.309071267 | 5.67E-13 | 4.33E-12 | 520 | 519 |
| CST1      | 0.30904504  | 5.70E-13 | 4.35E-12 | 520 | 501 |
| DACH1     | 0.308918084 | 5.83E-13 | 4.45E-12 | 520 | 516 |
| C20orf123 | 0.308906393 | 5.84E-13 | 4.45E-12 | 520 | 247 |
| MS4A6A    | 0.308612081 | 6.16E-13 | 4.68E-12 | 520 | 520 |
| SETD7     | 0.308522738 | 6.26E-13 | 4.76E-12 | 520 | 520 |
| UTRN      | 0.308507355 | 6.28E-13 | 4.77E-12 | 520 | 520 |
| OSTM1     | 0.308426189 | 6.37E-13 | 4.84E-12 | 520 | 520 |
| HHATL     | 0.308403681 | 6.39E-13 | 4.85E-12 | 520 | 325 |
| ARHGEF7   | 0.308292973 | 6.52E-13 | 4.95E-12 | 520 | 520 |
| SYNPO     | 0.308252063 | 6.57E-13 | 4.98E-12 | 520 | 520 |
| CFH       | 0.308214167 | 6.62E-13 | 5.02E-12 | 520 | 520 |
| CKM       | 0.308126649 | 6.72E-13 | 5.09E-12 | 520 | 513 |
| C14orf149 | 0.308100826 | 6.75E-13 | 5.11E-12 | 520 | 520 |
| SCN3A     | 0.308075005 | 6.78E-13 | 5.13E-12 | 520 | 508 |
| RNF216    | 0.308062119 | 6.80E-13 | 5.14E-12 | 520 | 520 |
| STT3A     | 0.308060465 | 6.80E-13 | 5.14E-12 | 520 | 520 |
| STAC3     | 0.308050895 | 6.81E-13 | 5.15E-12 | 520 | 520 |
| IL6ST     | 0.308006435 | 6.87E-13 | 5.19E-12 | 520 | 520 |
| CRY2      | 0.307966151 | 6.92E-13 | 5.22E-12 | 520 | 520 |
| MYOM1     | 0.307955389 | 6.93E-13 | 5.23E-12 | 520 | 520 |
| NEK1      | 0.30775144  | 7.19E-13 | 5.42E-12 | 520 | 520 |
| IL17RA    | 0.307704209 | 7.25E-13 | 5.46E-12 | 520 | 520 |
| JAG1      | 0.307695193 | 7.26E-13 | 5.47E-12 | 520 | 520 |
| NF1       | 0.307595059 | 7.39E-13 | 5.56E-12 | 520 | 520 |
| POPDC2    | 0.307499425 | 7.52E-13 | 5.66E-12 | 520 | 520 |
| SALL2     | 0.307396034 | 7.66E-13 | 5.75E-12 | 520 | 519 |
| ADCY7     | 0.307283407 | 7.82E-13 | 5.87E-12 | 520 | 520 |
| LILRB5    | 0.307117574 | 8.05E-13 | 6.04E-12 | 520 | 519 |
| FNDC5     | 0.307075601 | 8.11E-13 | 6.09E-12 | 520 | 513 |
| ADAMTS18  | 0.30702461  | 8.19E-13 | 6.14E-12 | 520 | 481 |
| FTHL3     | 0.306972922 | 8.26E-13 | 6.19E-12 | 520 | 520 |
| SEMA6D    | 0.306950856 | 8.30E-13 | 6.22E-12 | 520 | 520 |
| CHST13    | 0.306793123 | 8.53E-13 | 6.38E-12 | 520 | 506 |
| UNC5A     | 0.306649782 | 8.75E-13 | 6.55E-12 | 520 | 514 |



|           |             |          |          |     |     |
|-----------|-------------|----------|----------|-----|-----|
| ARHGAP20  | 0.306472706 | 9.03E-13 | 6.75E-12 | 520 | 518 |
| MLXIP     | 0.306358213 | 9.22E-13 | 6.87E-12 | 520 | 520 |
| SELM      | 0.306353875 | 9.23E-13 | 6.88E-12 | 520 | 520 |
| ROCK2     | 0.306310439 | 9.30E-13 | 6.93E-12 | 520 | 520 |
| FAM65C    | 0.30620944  | 9.47E-13 | 7.05E-12 | 520 | 520 |
| MBTPS2    | 0.306165399 | 9.54E-13 | 7.10E-12 | 520 | 520 |
| SEC23IP   | 0.306142079 | 9.58E-13 | 7.12E-12 | 520 | 520 |
| RTN2      | 0.305941335 | 9.93E-13 | 7.38E-12 | 520 | 520 |
| FAM190B   | 0.305880035 | 1.00E-12 | 7.45E-12 | 520 | 520 |
| ARL10     | 0.30583385  | 1.01E-12 | 7.51E-12 | 520 | 519 |
| MMP3      | 0.305782291 | 1.02E-12 | 7.57E-12 | 520 | 520 |
| TEAD2     | 0.305695666 | 1.04E-12 | 7.69E-12 | 520 | 520 |
| PCDHGB4   | 0.30566408  | 1.04E-12 | 7.73E-12 | 520 | 502 |
| TMEM8A    | 0.305569079 | 1.06E-12 | 7.85E-12 | 520 | 520 |
| LOC134466 | 0.30550239  | 1.07E-12 | 7.94E-12 | 520 | 504 |
| CD14      | 0.305174707 | 1.14E-12 | 8.41E-12 | 520 | 520 |
| ZNF583    | 0.305028609 | 1.17E-12 | 8.62E-12 | 520 | 516 |
| PROC      | 0.304934796 | 1.19E-12 | 8.75E-12 | 520 | 518 |
| GIT2      | 0.304802488 | 1.22E-12 | 8.95E-12 | 520 | 520 |
| DPF3      | 0.304642902 | 1.25E-12 | 9.20E-12 | 520 | 517 |
| LILRB2    | 0.304527032 | 1.28E-12 | 9.38E-12 | 520 | 520 |
| POFUT1    | 0.304506505 | 1.28E-12 | 9.41E-12 | 520 | 520 |
| CYTSA     | 0.304492945 | 1.28E-12 | 9.43E-12 | 520 | 520 |
| ZNF676    | 0.304470811 | 1.29E-12 | 9.46E-12 | 520 | 334 |
| CSF3R     | 0.304458907 | 1.29E-12 | 9.47E-12 | 520 | 520 |
| MMRN2     | 0.304387922 | 1.31E-12 | 9.59E-12 | 520 | 520 |
| PDZD8     | 0.304320767 | 1.32E-12 | 9.70E-12 | 520 | 520 |
| ADD1      | 0.304306638 | 1.33E-12 | 9.72E-12 | 520 | 520 |
| HSD17B11  | 0.304179355 | 1.36E-12 | 9.94E-12 | 520 | 520 |
| DOCK11    | 0.30417782  | 1.36E-12 | 9.94E-12 | 520 | 520 |
| WTIP      | 0.304100625 | 1.38E-12 | 1.01E-11 | 520 | 520 |
| PCDHB3    | 0.303836005 | 1.44E-12 | 1.05E-11 | 520 | 519 |
| RAB42     | 0.30375184  | 1.46E-12 | 1.07E-11 | 520 | 518 |
| SIK2      | 0.303664751 | 1.49E-12 | 1.08E-11 | 520 | 520 |
| DPY19L1   | 0.303635539 | 1.49E-12 | 1.09E-11 | 520 | 520 |
| ZC3H13    | 0.303617159 | 1.50E-12 | 1.09E-11 | 520 | 520 |
| ZDHHC8    | 0.303565043 | 1.51E-12 | 1.10E-11 | 520 | 520 |
| LGMN      | 0.303407785 | 1.56E-12 | 1.13E-11 | 520 | 520 |
| RBMS1     | 0.303344929 | 1.57E-12 | 1.14E-11 | 520 | 520 |
| CD63      | 0.303175566 | 1.62E-12 | 1.18E-11 | 520 | 520 |
| FGF10     | 0.303142797 | 1.63E-12 | 1.18E-11 | 520 | 271 |
| FFAR3     | 0.303043666 | 1.66E-12 | 1.20E-11 | 520 | 452 |
| KIT       | 0.302979864 | 1.68E-12 | 1.22E-11 | 520 | 519 |
| WDR35     | 0.302979534 | 1.68E-12 | 1.22E-11 | 520 | 520 |
| ODZ2      | 0.302959264 | 1.68E-12 | 1.22E-11 | 520 | 520 |
| CHN2      | 0.302936072 | 1.69E-12 | 1.23E-11 | 520 | 520 |

|           |             |          |          |     |     |
|-----------|-------------|----------|----------|-----|-----|
| SDK1      | 0.302642833 | 1.78E-12 | 1.29E-11 | 520 | 520 |
| C8orf34   | 0.30260436  | 1.79E-12 | 1.30E-11 | 520 | 454 |
| NFIC      | 0.302571239 | 1.80E-12 | 1.30E-11 | 520 | 520 |
| FAM195B   | 0.302566834 | 1.80E-12 | 1.31E-11 | 520 | 520 |
| SHE       | 0.302486585 | 1.83E-12 | 1.32E-11 | 520 | 520 |
| BARX1     | 0.302473568 | 1.83E-12 | 1.33E-11 | 520 | 514 |
| LOC145783 | 0.302470729 | 1.83E-12 | 1.33E-11 | 520 | 519 |
| LATS1     | 0.302307742 | 1.89E-12 | 1.36E-11 | 520 | 520 |
| ATM       | 0.302209915 | 1.92E-12 | 1.39E-11 | 520 | 520 |
| EFR3A     | 0.302097348 | 1.96E-12 | 1.41E-11 | 520 | 520 |
| ATP7B     | 0.302082295 | 1.96E-12 | 1.41E-11 | 520 | 520 |
| C12orf59  | 0.30199984  | 1.99E-12 | 1.43E-11 | 520 | 514 |
| C14orf139 | 0.30188599  | 2.03E-12 | 1.46E-11 | 520 | 519 |
| COG6      | 0.301873914 | 2.04E-12 | 1.46E-11 | 520 | 520 |
| IFITM2    | 0.301853198 | 2.04E-12 | 1.47E-11 | 520 | 520 |
| MAP4K4    | 0.301792556 | 2.07E-12 | 1.48E-11 | 520 | 520 |
| UTP14C    | 0.301742712 | 2.08E-12 | 1.50E-11 | 520 | 520 |
| MIB1      | 0.301636156 | 2.12E-12 | 1.52E-11 | 520 | 520 |
| NFAM1     | 0.301500502 | 2.17E-12 | 1.56E-11 | 520 | 520 |
| OSM       | 0.301461934 | 2.19E-12 | 1.57E-11 | 520 | 520 |
| HEY1      | 0.301151582 | 2.31E-12 | 1.66E-11 | 520 | 520 |
| FZD7      | 0.301069541 | 2.34E-12 | 1.68E-11 | 520 | 520 |
| CCL11     | 0.30104371  | 2.36E-12 | 1.69E-11 | 520 | 517 |
| AOX1      | 0.300955291 | 2.39E-12 | 1.71E-11 | 520 | 519 |
| ADAM10    | 0.300950387 | 2.39E-12 | 1.71E-11 | 520 | 520 |
| SLC27A1   | 0.300914715 | 2.41E-12 | 1.72E-11 | 520 | 520 |
| WDR81     | 0.300904482 | 2.41E-12 | 1.72E-11 | 520 | 520 |
| RBMS2     | 0.300895659 | 2.42E-12 | 1.73E-11 | 520 | 520 |
| SHANK3    | 0.300831248 | 2.44E-12 | 1.75E-11 | 520 | 520 |
| GPR180    | 0.300786745 | 2.46E-12 | 1.76E-11 | 520 | 520 |
| FLJ36031  | 0.300768447 | 2.47E-12 | 1.76E-11 | 520 | 520 |
| GRIP2     | 0.300738932 | 2.48E-12 | 1.77E-11 | 520 | 513 |
| ADCY4     | 0.30039626  | 2.64E-12 | 1.88E-11 | 520 | 520 |
| KLHL6     | 0.300338372 | 2.66E-12 | 1.89E-11 | 520 | 520 |
| DMD       | 0.300224139 | 2.72E-12 | 1.93E-11 | 520 | 520 |
| SOX4      | 0.300196746 | 2.73E-12 | 1.94E-11 | 520 | 520 |
| CD99      | 0.300195024 | 2.73E-12 | 1.94E-11 | 520 | 520 |
| DOCK10    | 0.300167214 | 2.74E-12 | 1.95E-11 | 520 | 520 |
| AKAP11    | 0.300110986 | 2.77E-12 | 1.97E-11 | 520 | 520 |
| C3orf55   | 0.300098006 | 2.78E-12 | 1.97E-11 | 520 | 461 |
| CACNA2D1  | 0.300009241 | 2.82E-12 | 2.00E-11 | 520 | 508 |
| FOXF1     | 0.299880654 | 2.88E-12 | 2.04E-11 | 520 | 519 |
| RASSF2    | 0.299879573 | 2.89E-12 | 2.04E-11 | 520 | 520 |
| ZNF542    | 0.299848393 | 2.90E-12 | 2.05E-11 | 520 | 520 |
| HTR1F     | 0.299807347 | 2.92E-12 | 2.07E-11 | 520 | 466 |
| PTPRU     | 0.299782345 | 2.93E-12 | 2.08E-11 | 520 | 520 |

|           |             |          |          |     |     |
|-----------|-------------|----------|----------|-----|-----|
| SARM1     | 0.299763155 | 2.94E-12 | 2.08E-11 | 520 | 520 |
| GP5M1     | 0.299760869 | 2.95E-12 | 2.08E-11 | 520 | 520 |
| ABTB2     | 0.299729299 | 2.96E-12 | 2.09E-11 | 520 | 520 |
| ADRBK2    | 0.299524692 | 3.07E-12 | 2.17E-11 | 520 | 520 |
| LILRA1    | 0.299483307 | 3.09E-12 | 2.18E-11 | 520 | 478 |
| ZNF382    | 0.299417617 | 3.13E-12 | 2.21E-11 | 520 | 513 |
| ENAH      | 0.299366743 | 3.15E-12 | 2.22E-11 | 520 | 520 |
| LOC285696 | 0.299232896 | 3.23E-12 | 2.27E-11 | 520 | 352 |
| SLFN12    | 0.299196426 | 3.25E-12 | 2.29E-11 | 520 | 520 |
| ESYT1     | 0.299183071 | 3.26E-12 | 2.29E-11 | 520 | 520 |
| PCDHGA10  | 0.299097311 | 3.31E-12 | 2.32E-11 | 520 | 517 |
| EMR2      | 0.298972033 | 3.38E-12 | 2.37E-11 | 520 | 520 |
| ZNF85     | 0.298892807 | 3.42E-12 | 2.40E-11 | 520 | 520 |
| PAMR1     | 0.298614844 | 3.59E-12 | 2.52E-11 | 520 | 520 |
| LAMA3     | 0.298601498 | 3.60E-12 | 2.52E-11 | 520 | 520 |
| GIMAP8    | 0.29851724  | 3.65E-12 | 2.56E-11 | 520 | 520 |
| FPR2      | 0.29846286  | 3.69E-12 | 2.58E-11 | 520 | 516 |
| AZIN1     | 0.298313474 | 3.79E-12 | 2.65E-11 | 520 | 520 |
| HIVEP2    | 0.298263134 | 3.82E-12 | 2.67E-11 | 520 | 520 |
| CST4      | 0.298257466 | 3.82E-12 | 2.67E-11 | 520 | 422 |
| ZNF582    | 0.298083644 | 3.94E-12 | 2.75E-11 | 520 | 512 |
| C20orf200 | 0.297826207 | 4.12E-12 | 2.88E-11 | 520 | 369 |
| HRH1      | 0.297726256 | 4.19E-12 | 2.92E-11 | 520 | 520 |
| EXT1      | 0.297436114 | 4.40E-12 | 3.07E-11 | 520 | 520 |
| PIK3R5    | 0.297424239 | 4.41E-12 | 3.08E-11 | 520 | 520 |
| CXorf64   | 0.297355911 | 4.47E-12 | 3.11E-11 | 520 | 267 |
| MYH7      | 0.297293483 | 4.51E-12 | 3.14E-11 | 520 | 468 |
| PHKG1     | 0.297286257 | 4.52E-12 | 3.14E-11 | 520 | 496 |
| C6orf225  | 0.297224336 | 4.57E-12 | 3.18E-11 | 520 | 520 |
| L1TD1     | 0.297162568 | 4.62E-12 | 3.21E-11 | 520 | 448 |
| ZNF474    | 0.297143295 | 4.63E-12 | 3.22E-11 | 520 | 517 |
| ILDR2     | 0.297132626 | 4.64E-12 | 3.22E-11 | 520 | 367 |
| ITGAM     | 0.296886942 | 4.84E-12 | 3.35E-11 | 520 | 520 |
| FMNL1     | 0.29687241  | 4.85E-12 | 3.36E-11 | 520 | 520 |
| KIDINS220 | 0.296850222 | 4.87E-12 | 3.37E-11 | 520 | 520 |
| KCTD10    | 0.296828259 | 4.89E-12 | 3.38E-11 | 520 | 520 |
| ZFP1      | 0.296777265 | 4.93E-12 | 3.41E-11 | 520 | 520 |
| PRRC1     | 0.296721271 | 4.98E-12 | 3.44E-11 | 520 | 520 |
| CACNG6    | 0.296550006 | 5.13E-12 | 3.54E-11 | 520 | 373 |
| DYSFIP1   | 0.29650646  | 5.17E-12 | 3.56E-11 | 520 | 477 |
| TRIL      | 0.29644831  | 5.22E-12 | 3.60E-11 | 520 | 519 |
| C6orf191  | 0.296423641 | 5.24E-12 | 3.61E-11 | 520 | 223 |
| EFHA2     | 0.296126871 | 5.52E-12 | 3.80E-11 | 520 | 512 |
| CHRD2     | 0.296059576 | 5.58E-12 | 3.84E-11 | 520 | 504 |
| GNA13     | 0.296050159 | 5.59E-12 | 3.84E-11 | 520 | 520 |
| 2-Sep     | 0.295919536 | 5.71E-12 | 3.93E-11 | 520 | 520 |

|              |             |          |          |     |     |
|--------------|-------------|----------|----------|-----|-----|
| BMP6         | 0.295908991 | 5.72E-12 | 3.93E-11 | 520 | 519 |
| OSBPL8       | 0.295893451 | 5.74E-12 | 3.94E-11 | 520 | 520 |
| GAL3ST4      | 0.295861312 | 5.77E-12 | 3.96E-11 | 520 | 520 |
| TMEM150B     | 0.295762155 | 5.87E-12 | 4.02E-11 | 520 | 514 |
| MYBPC1       | 0.295718191 | 5.91E-12 | 4.05E-11 | 520 | 458 |
| CPE          | 0.295519467 | 6.12E-12 | 4.19E-11 | 520 | 520 |
| FCGR2B       | 0.295483871 | 6.16E-12 | 4.21E-11 | 520 | 520 |
| TMX4         | 0.295397043 | 6.25E-12 | 4.27E-11 | 520 | 520 |
| KCTD16       | 0.295144557 | 6.52E-12 | 4.46E-11 | 520 | 433 |
| ZNF727       | 0.295133412 | 6.54E-12 | 4.46E-11 | 520 | 304 |
| GPR64        | 0.295122584 | 6.55E-12 | 4.47E-11 | 520 | 510 |
| MYOM3        | 0.295122064 | 6.55E-12 | 4.47E-11 | 520 | 520 |
| MGAT1        | 0.295007514 | 6.68E-12 | 4.56E-11 | 520 | 520 |
| ANKRD34A     | 0.294952013 | 6.74E-12 | 4.60E-11 | 520 | 519 |
| RAB30        | 0.29493829  | 6.76E-12 | 4.61E-11 | 520 | 520 |
| NDP          | 0.294877058 | 6.83E-12 | 4.65E-11 | 520 | 471 |
| DUSP4        | 0.294847864 | 6.86E-12 | 4.67E-11 | 520 | 520 |
| MAN2B1       | 0.294804207 | 6.91E-12 | 4.71E-11 | 520 | 520 |
| TOR1AIP1     | 0.294730677 | 7.00E-12 | 4.76E-11 | 520 | 520 |
| FLJ42709     | 0.294682874 | 7.06E-12 | 4.80E-11 | 520 | 520 |
| OSMR         | 0.294628172 | 7.12E-12 | 4.84E-11 | 520 | 520 |
| C19orf12     | 0.294604294 | 7.15E-12 | 4.86E-11 | 520 | 520 |
| ST8SIA4      | 0.294532335 | 7.24E-12 | 4.91E-11 | 520 | 520 |
| IL17D        | 0.294493083 | 7.29E-12 | 4.94E-11 | 520 | 499 |
| RNF152       | 0.294371799 | 7.44E-12 | 5.05E-11 | 520 | 520 |
| LIMK1        | 0.294332914 | 7.49E-12 | 5.08E-11 | 520 | 520 |
| HSP90B3P     | 0.294226181 | 7.63E-12 | 5.17E-11 | 520 | 519 |
| ZDHC17       | 0.293999029 | 7.93E-12 | 5.37E-11 | 520 | 520 |
| EYA4         | 0.293995181 | 7.94E-12 | 5.37E-11 | 520 | 503 |
| ZFP82        | 0.293879182 | 8.09E-12 | 5.48E-11 | 520 | 520 |
| PALM         | 0.293820041 | 8.17E-12 | 5.53E-11 | 520 | 520 |
| CDK17        | 0.293760622 | 8.26E-12 | 5.58E-11 | 520 | 520 |
| RNF217       | 0.293723967 | 8.31E-12 | 5.61E-11 | 520 | 520 |
| CCDC149      | 0.293605865 | 8.48E-12 | 5.72E-11 | 520 | 520 |
| HEXA         | 0.293602802 | 8.48E-12 | 5.72E-11 | 520 | 520 |
| ZNF618       | 0.293537783 | 8.58E-12 | 5.78E-11 | 520 | 520 |
| MAST2        | 0.293424938 | 8.74E-12 | 5.89E-11 | 520 | 520 |
| KIAA1429     | 0.293379339 | 8.81E-12 | 5.93E-11 | 520 | 520 |
| LHX1         | 0.293359525 | 8.84E-12 | 5.95E-11 | 520 | 424 |
| LOC100302640 | 0.293341325 | 8.87E-12 | 5.96E-11 | 520 | 421 |
| SMTNL2       | 0.293331627 | 8.88E-12 | 5.97E-11 | 520 | 509 |
| MYOZ1        | 0.293215568 | 9.06E-12 | 6.09E-11 | 520 | 508 |
| GBF1         | 0.293086608 | 9.26E-12 | 6.21E-11 | 520 | 520 |
| FGF1         | 0.293027247 | 9.35E-12 | 6.27E-11 | 520 | 520 |
| MYH2         | 0.29293687  | 9.50E-12 | 6.37E-11 | 520 | 397 |
| DUSP26       | 0.292761544 | 9.78E-12 | 6.55E-11 | 520 | 493 |

|             |             |          |          |     |     |
|-------------|-------------|----------|----------|-----|-----|
| FBXO17      | 0.29274971  | 9.80E-12 | 6.56E-11 | 520 | 519 |
| LMAN1       | 0.292699498 | 9.88E-12 | 6.61E-11 | 520 | 520 |
| CATSPER1    | 0.292596073 | 1.01E-11 | 6.73E-11 | 520 | 516 |
| FCGR1A      | 0.292581919 | 1.01E-11 | 6.74E-11 | 520 | 519 |
| PCDHB7      | 0.292455401 | 1.03E-11 | 6.88E-11 | 520 | 520 |
| SYT7        | 0.292407431 | 1.04E-11 | 6.94E-11 | 520 | 520 |
| CDR2L       | 0.292253604 | 1.07E-11 | 7.12E-11 | 520 | 520 |
| LOC729020   | 0.292218539 | 1.07E-11 | 7.16E-11 | 520 | 520 |
| AHR         | 0.292181498 | 1.08E-11 | 7.20E-11 | 520 | 520 |
| LOH3CR2A    | 0.292148021 | 1.08E-11 | 7.24E-11 | 520 | 519 |
| ACTBL2      | 0.292082523 | 1.10E-11 | 7.31E-11 | 520 | 451 |
| DNAH10      | 0.292050834 | 1.10E-11 | 7.35E-11 | 520 | 516 |
| ZNF643      | 0.292005851 | 1.11E-11 | 7.41E-11 | 520 | 520 |
| CMTM7       | 0.291982966 | 1.12E-11 | 7.43E-11 | 520 | 520 |
| CD300A      | 0.291958197 | 1.12E-11 | 7.46E-11 | 520 | 520 |
| GRASP       | 0.291894598 | 1.13E-11 | 7.54E-11 | 520 | 520 |
| PKN1        | 0.291880203 | 1.14E-11 | 7.55E-11 | 520 | 520 |
| FAM13A      | 0.291756786 | 1.16E-11 | 7.70E-11 | 520 | 520 |
| LXN         | 0.291707628 | 1.17E-11 | 7.77E-11 | 520 | 520 |
| LRIG1       | 0.291567373 | 1.20E-11 | 7.95E-11 | 520 | 520 |
| C14orf118   | 0.29143556  | 1.22E-11 | 8.12E-11 | 520 | 520 |
| HTR7        | 0.291393526 | 1.23E-11 | 8.17E-11 | 520 | 520 |
| SSR3        | 0.291344475 | 1.24E-11 | 8.24E-11 | 520 | 520 |
| AAK1        | 0.291291178 | 1.25E-11 | 8.31E-11 | 520 | 520 |
| FAM119B     | 0.291055747 | 1.30E-11 | 8.64E-11 | 520 | 520 |
| CYSLTR1     | 0.290966827 | 1.32E-11 | 8.76E-11 | 520 | 516 |
| TMEM8B      | 0.290958459 | 1.33E-11 | 8.77E-11 | 520 | 520 |
| DLGAP4      | 0.290954221 | 1.33E-11 | 8.78E-11 | 520 | 520 |
| RCBTB1      | 0.290914168 | 1.34E-11 | 8.83E-11 | 520 | 520 |
| ACLY        | 0.290911095 | 1.34E-11 | 8.83E-11 | 520 | 520 |
| SC65        | 0.290862883 | 1.35E-11 | 8.90E-11 | 520 | 520 |
| ZNF192      | 0.290851788 | 1.35E-11 | 8.91E-11 | 520 | 519 |
| TMCC2       | 0.290648447 | 1.40E-11 | 9.21E-11 | 520 | 520 |
| KCNK3       | 0.29064195  | 1.40E-11 | 9.22E-11 | 520 | 502 |
| SLC37A3     | 0.290550898 | 1.42E-11 | 9.36E-11 | 520 | 520 |
| C3orf36     | 0.290378555 | 1.46E-11 | 9.61E-11 | 520 | 517 |
| TNPO1       | 0.29034125  | 1.47E-11 | 9.67E-11 | 520 | 520 |
| MEX3C       | 0.290248506 | 1.49E-11 | 9.82E-11 | 520 | 520 |
| FRY         | 0.290174292 | 1.51E-11 | 9.94E-11 | 520 | 520 |
| GSPT2       | 0.289839034 | 1.60E-11 | 1.05E-10 | 520 | 520 |
| SRPR        | 0.289769418 | 1.62E-11 | 1.06E-10 | 520 | 520 |
| PTK2        | 0.289723027 | 1.63E-11 | 1.07E-10 | 520 | 520 |
| FURIN       | 0.289694375 | 1.64E-11 | 1.07E-10 | 520 | 520 |
| LRRN4CL     | 0.289598513 | 1.66E-11 | 1.09E-10 | 520 | 520 |
| PELI2       | 0.289592256 | 1.67E-11 | 1.09E-10 | 520 | 520 |
| SNORD116-20 | 0.289511683 | 1.69E-11 | 1.10E-10 | 520 | 384 |

|          |             |          |          |     |     |
|----------|-------------|----------|----------|-----|-----|
| COPS8    | 0.289404451 | 1.72E-11 | 1.12E-10 | 520 | 520 |
| HTR1D    | 0.28937791  | 1.73E-11 | 1.13E-10 | 520 | 510 |
| RTN1     | 0.289333721 | 1.74E-11 | 1.14E-10 | 520 | 520 |
| ALDH1A2  | 0.289281976 | 1.75E-11 | 1.15E-10 | 520 | 500 |
| CBL      | 0.28926936  | 1.76E-11 | 1.15E-10 | 520 | 520 |
| SCUBE3   | 0.289231854 | 1.77E-11 | 1.15E-10 | 520 | 507 |
| DMWD     | 0.289203444 | 1.78E-11 | 1.16E-10 | 520 | 520 |
| SEMA4F   | 0.289200511 | 1.78E-11 | 1.16E-10 | 520 | 520 |
| OAZ2     | 0.289145323 | 1.80E-11 | 1.17E-10 | 520 | 520 |
| HNRPLL   | 0.289075933 | 1.82E-11 | 1.18E-10 | 520 | 520 |
| C20orf30 | 0.288707003 | 1.93E-11 | 1.25E-10 | 520 | 520 |
| SLC30A1  | 0.288618663 | 1.96E-11 | 1.27E-10 | 520 | 520 |
| SMPD1    | 0.28853065  | 1.99E-11 | 1.29E-10 | 520 | 520 |
| KDEL1R1  | 0.288442268 | 2.02E-11 | 1.31E-10 | 520 | 520 |
| BCAR3    | 0.288398349 | 2.03E-11 | 1.32E-10 | 520 | 520 |
| LOXL4    | 0.288333139 | 2.06E-11 | 1.33E-10 | 520 | 520 |
| SLC40A1  | 0.288244039 | 2.09E-11 | 1.35E-10 | 520 | 520 |
| LILRB1   | 0.288195814 | 2.10E-11 | 1.36E-10 | 520 | 520 |
| KLHL29   | 0.288079401 | 2.14E-11 | 1.39E-10 | 520 | 520 |
| ADORA3   | 0.287703658 | 2.28E-11 | 1.47E-10 | 520 | 519 |
| RSU1     | 0.287672101 | 2.29E-11 | 1.48E-10 | 520 | 520 |
| ZNF385B  | 0.287471381 | 2.37E-11 | 1.53E-10 | 520 | 501 |
| CDS2     | 0.287420964 | 2.39E-11 | 1.54E-10 | 520 | 520 |
| NBEA     | 0.287390776 | 2.40E-11 | 1.55E-10 | 520 | 515 |
| PAK3     | 0.287206706 | 2.48E-11 | 1.60E-10 | 520 | 413 |
| PLCB4    | 0.287166735 | 2.49E-11 | 1.61E-10 | 520 | 518 |
| CLTC     | 0.287072731 | 2.53E-11 | 1.63E-10 | 520 | 520 |
| RNF215   | 0.287069641 | 2.53E-11 | 1.63E-10 | 520 | 520 |
| SLC38A10 | 0.287050047 | 2.54E-11 | 1.63E-10 | 520 | 520 |
| PRDM5    | 0.286971731 | 2.58E-11 | 1.65E-10 | 520 | 519 |
| POLK     | 0.286899844 | 2.61E-11 | 1.67E-10 | 520 | 520 |
| C6orf138 | 0.286899383 | 2.61E-11 | 1.67E-10 | 520 | 516 |
| GPSM3    | 0.286860378 | 2.62E-11 | 1.68E-10 | 520 | 520 |
| CCNI     | 0.286705437 | 2.69E-11 | 1.73E-10 | 520 | 520 |
| CXXC5    | 0.286342465 | 2.86E-11 | 1.83E-10 | 520 | 520 |
| TINAGL1  | 0.286304786 | 2.88E-11 | 1.84E-10 | 520 | 520 |
| PGM5P2   | 0.28621805  | 2.92E-11 | 1.87E-10 | 520 | 433 |
| ATP8B4   | 0.28609245  | 2.98E-11 | 1.90E-10 | 520 | 519 |
| PCBP3    | 0.286075302 | 2.99E-11 | 1.91E-10 | 520 | 520 |
| MYH13    | 0.286058659 | 2.99E-11 | 1.91E-10 | 520 | 389 |
| SATB1    | 0.285938807 | 3.05E-11 | 1.95E-10 | 520 | 520 |
| MYH6     | 0.285885038 | 3.08E-11 | 1.97E-10 | 520 | 379 |
| GGN      | 0.285774105 | 3.14E-11 | 2.00E-10 | 520 | 519 |
| COX6A2   | 0.285731107 | 3.16E-11 | 2.01E-10 | 520 | 349 |
| MMP12    | 0.285706376 | 3.17E-11 | 2.02E-10 | 520 | 520 |
| POMT2    | 0.285532044 | 3.27E-11 | 2.08E-10 | 520 | 520 |

|           |             |          |          |     |     |
|-----------|-------------|----------|----------|-----|-----|
| RGS18     | 0.285459966 | 3.30E-11 | 2.10E-10 | 520 | 517 |
| TLR7      | 0.285235747 | 3.43E-11 | 2.18E-10 | 520 | 517 |
| GAS6      | 0.285214418 | 3.44E-11 | 2.19E-10 | 520 | 520 |
| PAX7      | 0.285187189 | 3.46E-11 | 2.20E-10 | 520 | 344 |
| CDK6      | 0.285039559 | 3.54E-11 | 2.25E-10 | 520 | 520 |
| UBXN10    | 0.284991341 | 3.57E-11 | 2.26E-10 | 520 | 514 |
| PCDHA6    | 0.284960973 | 3.59E-11 | 2.27E-10 | 520 | 301 |
| PTEN      | 0.284955899 | 3.59E-11 | 2.28E-10 | 520 | 520 |
| OPN3      | 0.284768457 | 3.70E-11 | 2.34E-10 | 520 | 520 |
| ZNF689    | 0.284714933 | 3.73E-11 | 2.36E-10 | 520 | 519 |
| CD300LF   | 0.284661415 | 3.77E-11 | 2.38E-10 | 520 | 520 |
| FAM196A   | 0.284430415 | 3.91E-11 | 2.47E-10 | 520 | 497 |
| LOC541471 | 0.284428931 | 3.91E-11 | 2.47E-10 | 520 | 520 |
| ZNF462    | 0.28430652  | 3.99E-11 | 2.52E-10 | 520 | 520 |
| ANKRD44   | 0.284234123 | 4.04E-11 | 2.55E-10 | 520 | 520 |
| RTN4      | 0.284197215 | 4.06E-11 | 2.56E-10 | 520 | 520 |
| MSX1      | 0.284196798 | 4.06E-11 | 2.56E-10 | 520 | 520 |
| RXFP1     | 0.284147038 | 4.10E-11 | 2.58E-10 | 520 | 439 |
| MGRN1     | 0.284113786 | 4.12E-11 | 2.59E-10 | 520 | 520 |
| C6orf123  | 0.283992314 | 4.20E-11 | 2.64E-10 | 520 | 443 |
| NCKAP1L   | 0.283988877 | 4.21E-11 | 2.64E-10 | 520 | 520 |
| ABI2      | 0.283982233 | 4.21E-11 | 2.65E-10 | 520 | 520 |
| ZNF804A   | 0.283942304 | 4.24E-11 | 2.66E-10 | 520 | 479 |
| GABARAPL3 | 0.283751581 | 4.37E-11 | 2.75E-10 | 520 | 476 |
| FIGN      | 0.283548971 | 4.52E-11 | 2.84E-10 | 520 | 509 |
| TNNC1     | 0.283546868 | 4.52E-11 | 2.84E-10 | 520 | 496 |
| PDZD7     | 0.283392482 | 4.64E-11 | 2.91E-10 | 520 | 518 |
| SLC24A3   | 0.283361799 | 4.66E-11 | 2.92E-10 | 520 | 520 |
| FCN1      | 0.283214584 | 4.77E-11 | 2.99E-10 | 520 | 519 |
| C4A       | 0.283080024 | 4.88E-11 | 3.05E-10 | 520 | 520 |
| FCGRT     | 0.28307266  | 4.88E-11 | 3.06E-10 | 520 | 520 |
| C5orf58   | 0.283050587 | 4.90E-11 | 3.07E-10 | 520 | 443 |
| BET1L     | 0.283040393 | 4.91E-11 | 3.07E-10 | 520 | 520 |
| FOXP3     | 0.283020461 | 4.92E-11 | 3.08E-10 | 520 | 520 |
| WWC3      | 0.283001342 | 4.94E-11 | 3.09E-10 | 520 | 520 |
| KCNA7     | 0.282970245 | 4.97E-11 | 3.10E-10 | 520 | 496 |
| ARHGAP21  | 0.282962213 | 4.97E-11 | 3.11E-10 | 520 | 520 |
| PAR5      | 0.282917561 | 5.01E-11 | 3.13E-10 | 520 | 467 |
| TCEAL5    | 0.282801322 | 5.10E-11 | 3.18E-10 | 520 | 515 |
| FHL2      | 0.282760755 | 5.14E-11 | 3.20E-10 | 520 | 520 |
| RCSD1     | 0.282497019 | 5.36E-11 | 3.34E-10 | 520 | 520 |
| LNPEP     | 0.282461649 | 5.39E-11 | 3.36E-10 | 520 | 520 |
| SLC20A1   | 0.282416544 | 5.43E-11 | 3.38E-10 | 520 | 520 |
| ATL1      | 0.282395518 | 5.45E-11 | 3.39E-10 | 520 | 520 |
| CGB1      | 0.282383711 | 5.46E-11 | 3.40E-10 | 520 | 224 |
| FAM20A    | 0.282356566 | 5.49E-11 | 3.41E-10 | 520 | 520 |

|            |             |          |          |     |     |
|------------|-------------|----------|----------|-----|-----|
| SIGLEC10   | 0.282297182 | 5.54E-11 | 3.44E-10 | 520 | 520 |
| MARCKS     | 0.282262039 | 5.57E-11 | 3.46E-10 | 520 | 520 |
| GPR125     | 0.282229605 | 5.60E-11 | 3.48E-10 | 520 | 520 |
| SHOX2      | 0.2821896   | 5.64E-11 | 3.50E-10 | 520 | 519 |
| C6orf72    | 0.282175183 | 5.65E-11 | 3.51E-10 | 520 | 520 |
| RNF122     | 0.282091694 | 5.73E-11 | 3.55E-10 | 520 | 520 |
| CYP27A1    | 0.281846739 | 5.96E-11 | 3.69E-10 | 520 | 520 |
| ELN        | 0.281802743 | 6.00E-11 | 3.72E-10 | 520 | 520 |
| RBP4       | 0.281735944 | 6.07E-11 | 3.76E-10 | 520 | 449 |
| LRP4       | 0.281708334 | 6.09E-11 | 3.77E-10 | 520 | 520 |
| NBLA00301  | 0.281707753 | 6.09E-11 | 3.77E-10 | 520 | 381 |
| SPSB1      | 0.281694116 | 6.11E-11 | 3.78E-10 | 520 | 520 |
| C12orf68   | 0.281686657 | 6.12E-11 | 3.78E-10 | 520 | 520 |
| CACNA2D4   | 0.281527261 | 6.27E-11 | 3.88E-10 | 520 | 519 |
| FOXN3      | 0.281268202 | 6.54E-11 | 4.04E-10 | 520 | 520 |
| MAP1LC3B   | 0.281204955 | 6.61E-11 | 4.08E-10 | 520 | 520 |
| REM1       | 0.281177397 | 6.64E-11 | 4.09E-10 | 520 | 519 |
| LPP        | 0.281132565 | 6.69E-11 | 4.12E-10 | 520 | 520 |
| FIGNL2     | 0.280984677 | 6.85E-11 | 4.22E-10 | 520 | 516 |
| NECAB1     | 0.28095786  | 6.88E-11 | 4.23E-10 | 520 | 517 |
| PEX5L      | 0.280947987 | 6.89E-11 | 4.24E-10 | 520 | 381 |
| SECISBP2L  | 0.280901387 | 6.94E-11 | 4.27E-10 | 520 | 520 |
| PCDHGB2    | 0.28087315  | 6.97E-11 | 4.28E-10 | 520 | 513 |
| RASSF3     | 0.280862126 | 6.99E-11 | 4.29E-10 | 520 | 520 |
| SYNGAP1    | 0.280809663 | 7.05E-11 | 4.32E-10 | 520 | 520 |
| C5orf41    | 0.28080848  | 7.05E-11 | 4.32E-10 | 520 | 520 |
| FNIP1      | 0.280564695 | 7.33E-11 | 4.49E-10 | 520 | 520 |
| HCFC2      | 0.280563643 | 7.33E-11 | 4.49E-10 | 520 | 520 |
| ASB10      | 0.280560079 | 7.34E-11 | 4.49E-10 | 520 | 244 |
| KLHDC5     | 0.280475106 | 7.44E-11 | 4.55E-10 | 520 | 520 |
| DET1       | 0.280430632 | 7.49E-11 | 4.58E-10 | 520 | 520 |
| GJA1       | 0.28041203  | 7.51E-11 | 4.59E-10 | 520 | 520 |
| SYT6       | 0.280396892 | 7.53E-11 | 4.60E-10 | 520 | 463 |
| PNMA1      | 0.280374237 | 7.56E-11 | 4.62E-10 | 520 | 520 |
| CA3        | 0.280357114 | 7.58E-11 | 4.63E-10 | 520 | 497 |
| BIN1       | 0.280343725 | 7.60E-11 | 4.64E-10 | 520 | 520 |
| NCRNA00152 | 0.280306081 | 7.64E-11 | 4.66E-10 | 520 | 520 |
| ALDH3B1    | 0.280163143 | 7.82E-11 | 4.77E-10 | 520 | 520 |
| PPARGC1A   | 0.280158534 | 7.83E-11 | 4.77E-10 | 520 | 515 |
| SHC2       | 0.280141796 | 7.85E-11 | 4.78E-10 | 520 | 520 |
| SSH2       | 0.280054691 | 7.96E-11 | 4.84E-10 | 520 | 520 |
| SLC2A13    | 0.280038252 | 7.98E-11 | 4.85E-10 | 520 | 519 |
| NGF        | 0.280012803 | 8.01E-11 | 4.87E-10 | 520 | 509 |
| ST3GAL4    | 0.279962127 | 8.08E-11 | 4.91E-10 | 520 | 520 |
| DISC1      | 0.27989044  | 8.17E-11 | 4.96E-10 | 520 | 520 |
| EMB        | 0.279887685 | 8.17E-11 | 4.96E-10 | 520 | 520 |



|           |             |          |          |     |     |
|-----------|-------------|----------|----------|-----|-----|
| ZMIZ1     | 0.279867896 | 8.20E-11 | 4.98E-10 | 520 | 520 |
| HTR2B     | 0.279862106 | 8.21E-11 | 4.98E-10 | 520 | 507 |
| CD53      | 0.279834095 | 8.24E-11 | 5.00E-10 | 520 | 520 |
| TTLL7     | 0.279770335 | 8.33E-11 | 5.05E-10 | 520 | 518 |
| RGS19     | 0.279616871 | 8.54E-11 | 5.17E-10 | 520 | 520 |
| KIAA1383  | 0.27959592  | 8.57E-11 | 5.18E-10 | 520 | 516 |
| IL31RA    | 0.279571705 | 8.60E-11 | 5.20E-10 | 520 | 517 |
| NR2F1     | 0.279526896 | 8.66E-11 | 5.23E-10 | 520 | 519 |
| OXTR      | 0.279501365 | 8.70E-11 | 5.25E-10 | 520 | 520 |
| C1RL      | 0.279458395 | 8.76E-11 | 5.29E-10 | 520 | 520 |
| SUN2      | 0.279453652 | 8.76E-11 | 5.29E-10 | 520 | 520 |
| TBC1D5    | 0.27943716  | 8.79E-11 | 5.30E-10 | 520 | 520 |
| SNAP25    | 0.279407795 | 8.83E-11 | 5.33E-10 | 520 | 513 |
| BAI2      | 0.279350723 | 8.91E-11 | 5.37E-10 | 520 | 520 |
| GNPTAB    | 0.27934947  | 8.91E-11 | 5.37E-10 | 520 | 520 |
| ERN1      | 0.279306206 | 8.97E-11 | 5.40E-10 | 520 | 520 |
| GNA11     | 0.27928678  | 9.00E-11 | 5.42E-10 | 520 | 520 |
| DNAJC6    | 0.279286445 | 9.00E-11 | 5.42E-10 | 520 | 520 |
| MYLK2     | 0.279284755 | 9.00E-11 | 5.42E-10 | 520 | 518 |
| TM9SF2    | 0.279185485 | 9.15E-11 | 5.50E-10 | 520 | 520 |
| KLHL33    | 0.278946738 | 9.51E-11 | 5.71E-10 | 520 | 286 |
| PIGK      | 0.278907385 | 9.57E-11 | 5.74E-10 | 520 | 520 |
| ARFGAP3   | 0.278896604 | 9.58E-11 | 5.75E-10 | 520 | 520 |
| NUMBL     | 0.278718124 | 9.86E-11 | 5.92E-10 | 520 | 520 |
| PIK3R6    | 0.27868448  | 9.91E-11 | 5.95E-10 | 520 | 519 |
| DPP4      | 0.278670368 | 9.94E-11 | 5.96E-10 | 520 | 520 |
| SEC22B    | 0.278646379 | 9.97E-11 | 5.98E-10 | 520 | 520 |
| SCHIP1    | 0.278599217 | 1.00E-10 | 6.02E-10 | 520 | 520 |
| GPRASP1   | 0.278593508 | 1.01E-10 | 6.02E-10 | 520 | 519 |
| SGPP1     | 0.278583272 | 1.01E-10 | 6.03E-10 | 520 | 520 |
| FHOD1     | 0.278472377 | 1.03E-10 | 6.14E-10 | 520 | 520 |
| SLC36A1   | 0.278415925 | 1.03E-10 | 6.19E-10 | 520 | 520 |
| CHRD1     | 0.278399054 | 1.04E-10 | 6.20E-10 | 520 | 488 |
| LRRC55    | 0.27836683  | 1.04E-10 | 6.23E-10 | 520 | 513 |
| PCDHA7    | 0.278311451 | 1.05E-10 | 6.29E-10 | 520 | 415 |
| YPEL4     | 0.278300704 | 1.05E-10 | 6.30E-10 | 520 | 518 |
| WASF3     | 0.278249327 | 1.06E-10 | 6.35E-10 | 520 | 519 |
| HIPK3     | 0.278247768 | 1.06E-10 | 6.35E-10 | 520 | 520 |
| LOC284441 | 0.278210588 | 1.07E-10 | 6.38E-10 | 520 | 520 |
| AGBL1     | 0.278102519 | 1.09E-10 | 6.48E-10 | 520 | 401 |
| CCDC85A   | 0.27801277  | 1.10E-10 | 6.57E-10 | 520 | 511 |
| NTRK1     | 0.278010776 | 1.10E-10 | 6.57E-10 | 520 | 517 |
| GPR97     | 0.277921077 | 1.12E-10 | 6.66E-10 | 520 | 519 |
| MAP7D3    | 0.277795511 | 1.14E-10 | 6.80E-10 | 520 | 520 |
| POTEE     | 0.277763861 | 1.15E-10 | 6.83E-10 | 520 | 518 |
| KCNAB2    | 0.277699468 | 1.16E-10 | 6.89E-10 | 520 | 520 |

|           |             |          |          |     |     |
|-----------|-------------|----------|----------|-----|-----|
| LOC257358 | 0.277578861 | 1.18E-10 | 7.03E-10 | 520 | 430 |
| PLCE1     | 0.277417691 | 1.21E-10 | 7.20E-10 | 520 | 520 |
| C1orf198  | 0.277251012 | 1.25E-10 | 7.39E-10 | 520 | 520 |
| IL6       | 0.277193771 | 1.26E-10 | 7.46E-10 | 520 | 520 |
| RNF41     | 0.277074388 | 1.28E-10 | 7.59E-10 | 520 | 520 |
| PEG10     | 0.277023045 | 1.29E-10 | 7.65E-10 | 520 | 518 |
| KIAA0090  | 0.276892985 | 1.32E-10 | 7.81E-10 | 520 | 520 |
| MAP1LC3B2 | 0.276855617 | 1.33E-10 | 7.85E-10 | 520 | 520 |
| SBK2      | 0.276712641 | 1.36E-10 | 8.03E-10 | 520 | 181 |
| F7        | 0.276667492 | 1.37E-10 | 8.08E-10 | 520 | 450 |
| ZP1       | 0.276581282 | 1.39E-10 | 8.19E-10 | 520 | 387 |
| MPO       | 0.276523536 | 1.40E-10 | 8.26E-10 | 520 | 491 |
| EFCAB4B   | 0.276520509 | 1.40E-10 | 8.26E-10 | 520 | 520 |
| MT1L      | 0.276456455 | 1.41E-10 | 8.35E-10 | 520 | 520 |
| DLX1      | 0.276425832 | 1.42E-10 | 8.38E-10 | 520 | 518 |
| PRRG1     | 0.276379996 | 1.43E-10 | 8.44E-10 | 520 | 520 |
| RAB43     | 0.276223645 | 1.47E-10 | 8.64E-10 | 520 | 520 |
| UBASH3B   | 0.276092557 | 1.50E-10 | 8.82E-10 | 520 | 520 |
| CDH4      | 0.276077837 | 1.50E-10 | 8.84E-10 | 520 | 469 |
| TCAP      | 0.275862396 | 1.55E-10 | 9.14E-10 | 520 | 518 |
| YIPF7     | 0.27572918  | 1.59E-10 | 9.33E-10 | 520 | 266 |
| TMED10    | 0.275576974 | 1.62E-10 | 9.54E-10 | 520 | 520 |
| USHBP1    | 0.275453345 | 1.66E-10 | 9.72E-10 | 520 | 520 |
| CNGA3     | 0.275372385 | 1.68E-10 | 9.85E-10 | 520 | 324 |
| REST      | 0.27533298  | 1.69E-10 | 9.90E-10 | 520 | 520 |
| PACSIN2   | 0.275323675 | 1.69E-10 | 9.92E-10 | 520 | 520 |
| FADS3     | 0.275151284 | 1.74E-10 | 1.02E-09 | 520 | 520 |
| UVRAG     | 0.275147939 | 1.74E-10 | 1.02E-09 | 520 | 520 |
| PCDH19    | 0.275056398 | 1.76E-10 | 1.03E-09 | 520 | 507 |
| ART5      | 0.274913884 | 1.80E-10 | 1.06E-09 | 520 | 449 |
| ARMCX3    | 0.274904716 | 1.81E-10 | 1.06E-09 | 520 | 520 |
| RADIL     | 0.274812324 | 1.83E-10 | 1.07E-09 | 520 | 520 |
| SMYD3     | 0.274809376 | 1.83E-10 | 1.07E-09 | 520 | 520 |
| FAM19A3   | 0.274698389 | 1.87E-10 | 1.09E-09 | 520 | 472 |
| STMN2     | 0.274671997 | 1.87E-10 | 1.09E-09 | 520 | 385 |
| XRN2      | 0.274669417 | 1.87E-10 | 1.09E-09 | 520 | 520 |
| FRMD6     | 0.274645968 | 1.88E-10 | 1.10E-09 | 520 | 520 |
| FRMD3     | 0.274499574 | 1.93E-10 | 1.12E-09 | 520 | 501 |
| GCC2      | 0.274490379 | 1.93E-10 | 1.12E-09 | 520 | 520 |
| TNFSF13B  | 0.274458883 | 1.94E-10 | 1.13E-09 | 520 | 520 |
| ANKRD23   | 0.274314369 | 1.98E-10 | 1.15E-09 | 520 | 520 |
| PKD1L1    | 0.27426733  | 2.00E-10 | 1.16E-09 | 520 | 517 |
| FKRP      | 0.274233179 | 2.01E-10 | 1.17E-09 | 520 | 520 |
| KIAA1274  | 0.274187265 | 2.02E-10 | 1.18E-09 | 520 | 520 |
| WWTR1     | 0.274184516 | 2.02E-10 | 1.18E-09 | 520 | 520 |
| GJD3      | 0.274096261 | 2.05E-10 | 1.19E-09 | 520 | 519 |

|            |             |          |          |     |     |
|------------|-------------|----------|----------|-----|-----|
| FES        | 0.274072108 | 2.06E-10 | 1.20E-09 | 520 | 520 |
| CTSL1      | 0.274049829 | 2.07E-10 | 1.20E-09 | 520 | 520 |
| FRMD4A     | 0.274027096 | 2.07E-10 | 1.20E-09 | 520 | 520 |
| RAPSN      | 0.273882166 | 2.12E-10 | 1.23E-09 | 520 | 487 |
| RIPK2      | 0.273851245 | 2.13E-10 | 1.24E-09 | 520 | 520 |
| FAM73A     | 0.273845882 | 2.13E-10 | 1.24E-09 | 520 | 520 |
| LRRC66     | 0.273837207 | 2.14E-10 | 1.24E-09 | 520 | 501 |
| CLASP1     | 0.273827087 | 2.14E-10 | 1.24E-09 | 520 | 520 |
| LOC148824  | 0.273818639 | 2.14E-10 | 1.24E-09 | 520 | 210 |
| SLC30A4    | 0.273806674 | 2.15E-10 | 1.24E-09 | 520 | 520 |
| PCDH10     | 0.273789706 | 2.15E-10 | 1.25E-09 | 520 | 454 |
| VEZF1      | 0.273780668 | 2.16E-10 | 1.25E-09 | 520 | 520 |
| SPIN2A     | 0.27370164  | 2.18E-10 | 1.26E-09 | 520 | 419 |
| LIPC       | 0.273591309 | 2.22E-10 | 1.28E-09 | 520 | 512 |
| ALOX5AP    | 0.27348314  | 2.26E-10 | 1.30E-09 | 520 | 520 |
| LASS2      | 0.273469823 | 2.26E-10 | 1.31E-09 | 520 | 520 |
| MAP1S      | 0.273416139 | 2.28E-10 | 1.32E-09 | 520 | 520 |
| FCGR1C     | 0.27334191  | 2.31E-10 | 1.33E-09 | 520 | 517 |
| ZFP106     | 0.273337107 | 2.31E-10 | 1.33E-09 | 520 | 520 |
| PCDHB2     | 0.273329465 | 2.31E-10 | 1.33E-09 | 520 | 520 |
| SPRY2      | 0.273283682 | 2.33E-10 | 1.34E-09 | 520 | 520 |
| SRBD1      | 0.273218988 | 2.35E-10 | 1.36E-09 | 520 | 520 |
| LIMA1      | 0.273218235 | 2.35E-10 | 1.36E-09 | 520 | 520 |
| ZNF703     | 0.2731912   | 2.36E-10 | 1.36E-09 | 520 | 520 |
| CD1D       | 0.273160582 | 2.37E-10 | 1.37E-09 | 520 | 520 |
| NDNL2      | 0.273128304 | 2.39E-10 | 1.37E-09 | 520 | 520 |
| LY86       | 0.273125127 | 2.39E-10 | 1.37E-09 | 520 | 520 |
| CAV1       | 0.273022954 | 2.43E-10 | 1.40E-09 | 520 | 520 |
| PI4KA      | 0.272875582 | 2.48E-10 | 1.43E-09 | 520 | 520 |
| PTPN5      | 0.272828134 | 2.50E-10 | 1.44E-09 | 520 | 464 |
| LOC400940  | 0.272795177 | 2.51E-10 | 1.44E-09 | 520 | 164 |
| SNORD116-4 | 0.27276972  | 2.52E-10 | 1.45E-09 | 520 | 440 |
| APLP1      | 0.272685524 | 2.56E-10 | 1.47E-09 | 520 | 520 |
| ARPC1B     | 0.272684912 | 2.56E-10 | 1.47E-09 | 520 | 520 |
| RRM2B      | 0.272536866 | 2.62E-10 | 1.50E-09 | 520 | 520 |
| CNTN6      | 0.272463149 | 2.65E-10 | 1.51E-09 | 520 | 208 |
| LOC145820  | 0.272296566 | 2.72E-10 | 1.55E-09 | 520 | 505 |
| FAM105A    | 0.272274639 | 2.73E-10 | 1.56E-09 | 520 | 520 |
| VKORC1     | 0.272218814 | 2.75E-10 | 1.57E-09 | 520 | 520 |
| ENO3       | 0.272133055 | 2.79E-10 | 1.59E-09 | 520 | 520 |
| HFE        | 0.272126004 | 2.79E-10 | 1.59E-09 | 520 | 520 |
| PCDHGB3    | 0.272068822 | 2.82E-10 | 1.60E-09 | 520 | 494 |
| DZIP1L     | 0.272000227 | 2.85E-10 | 1.62E-09 | 520 | 520 |
| MYOF       | 0.271901475 | 2.89E-10 | 1.65E-09 | 520 | 520 |
| SLC30A2    | 0.271725114 | 2.97E-10 | 1.69E-09 | 520 | 415 |
| MICAL1     | 0.271632208 | 3.01E-10 | 1.71E-09 | 520 | 520 |

|          |              |          |          |     |     |
|----------|--------------|----------|----------|-----|-----|
| MT1F     | 0.271601524  | 3.03E-10 | 1.72E-09 | 520 | 520 |
| RGS5     | 0.271576704  | 3.04E-10 | 1.73E-09 | 520 | 520 |
| ZDHHHC9  | 0.271543993  | 3.06E-10 | 1.74E-09 | 520 | 520 |
| EIF2C3   | 0.271396904  | 3.13E-10 | 1.78E-09 | 520 | 520 |
| ESYT2    | 0.271361906  | 3.14E-10 | 1.78E-09 | 520 | 520 |
| TMEM200C | 0.271341954  | 3.15E-10 | 1.79E-09 | 520 | 458 |
| VENTX    | 0.271283096  | 3.18E-10 | 1.81E-09 | 520 | 515 |
| TCTN1    | 0.271279369  | 3.18E-10 | 1.81E-09 | 520 | 520 |
| C11orf63 | 0.271223449  | 3.21E-10 | 1.82E-09 | 520 | 519 |
| HDAC7    | 0.2711110857 | 3.27E-10 | 1.85E-09 | 520 | 520 |
| PQLC3    | 0.271078015  | 3.28E-10 | 1.86E-09 | 520 | 520 |
| USP13    | 0.271022835  | 3.31E-10 | 1.88E-09 | 520 | 520 |
| DRD2     | 0.271022115  | 3.31E-10 | 1.88E-09 | 520 | 451 |
| KLHL3    | 0.270860149  | 3.40E-10 | 1.92E-09 | 520 | 520 |
| MS4A14   | 0.27073685   | 3.46E-10 | 1.96E-09 | 520 | 520 |
| ACHE     | 0.270677791  | 3.49E-10 | 1.97E-09 | 520 | 520 |
| VSTM1    | 0.270666501  | 3.50E-10 | 1.98E-09 | 520 | 314 |
| TSGA14   | 0.270601448  | 3.54E-10 | 2.00E-09 | 520 | 520 |
| ARNT     | 0.270569396  | 3.55E-10 | 2.00E-09 | 520 | 520 |
| C21orf96 | 0.270482304  | 3.60E-10 | 2.03E-09 | 520 | 309 |
| MYO7B    | 0.27038285   | 3.66E-10 | 2.06E-09 | 520 | 518 |
| C6orf122 | 0.270301976  | 3.70E-10 | 2.09E-09 | 520 | 519 |
| TMEM64   | 0.27001021   | 3.87E-10 | 2.18E-09 | 520 | 520 |
| ANKIB1   | 0.269959634  | 3.91E-10 | 2.20E-09 | 520 | 520 |
| G0S2     | 0.269900838  | 3.94E-10 | 2.22E-09 | 520 | 520 |
| CCDC3    | 0.269701181  | 4.06E-10 | 2.28E-09 | 520 | 520 |
| TEP1     | 0.269656786  | 4.09E-10 | 2.30E-09 | 520 | 520 |
| PDE7A    | 0.269648323  | 4.10E-10 | 2.30E-09 | 520 | 520 |
| FCGR1B   | 0.269637191  | 4.10E-10 | 2.30E-09 | 520 | 520 |
| KIF5C    | 0.269606663  | 4.12E-10 | 2.31E-09 | 520 | 518 |
| BCL9L    | 0.269600843  | 4.13E-10 | 2.31E-09 | 520 | 520 |
| PLD3     | 0.269553335  | 4.16E-10 | 2.33E-09 | 520 | 520 |
| WNT9B    | 0.269549687  | 4.16E-10 | 2.33E-09 | 520 | 401 |
| CAT      | 0.269517593  | 4.18E-10 | 2.34E-09 | 520 | 520 |
| ZYG11B   | 0.269271105  | 4.34E-10 | 2.43E-09 | 520 | 520 |
| MYH16    | 0.269240035  | 4.36E-10 | 2.44E-09 | 520 | 490 |
| RAPGEF4  | 0.269230083  | 4.37E-10 | 2.44E-09 | 520 | 519 |
| SNX10    | 0.269200707  | 4.39E-10 | 2.45E-09 | 520 | 520 |
| C7orf42  | 0.269138757  | 4.43E-10 | 2.48E-09 | 520 | 520 |
| C17orf60 | 0.269123249  | 4.44E-10 | 2.48E-09 | 520 | 515 |
| ZKSCAN5  | 0.269109987  | 4.45E-10 | 2.49E-09 | 520 | 520 |
| MYT1L    | 0.268965207  | 4.55E-10 | 2.54E-09 | 520 | 256 |
| DMGDH    | 0.26888732   | 4.61E-10 | 2.57E-09 | 520 | 484 |
| BHLHE22  | 0.268845679  | 4.64E-10 | 2.59E-09 | 520 | 517 |
| XPR1     | 0.268806598  | 4.66E-10 | 2.60E-09 | 520 | 520 |
| ZNF333   | 0.268794409  | 4.67E-10 | 2.60E-09 | 520 | 520 |

|                     |             |          |          |     |     |
|---------------------|-------------|----------|----------|-----|-----|
| KIF6                | 0.26876202  | 4.70E-10 | 2.62E-09 | 520 | 495 |
| DKFZp566F0947       | 0.268751927 | 4.70E-10 | 2.62E-09 | 520 | 367 |
| SAMD4B              | 0.268656892 | 4.77E-10 | 2.65E-09 | 520 | 520 |
| ABHD2               | 0.268595334 | 4.82E-10 | 2.68E-09 | 520 | 520 |
| SCN7A               | 0.268580624 | 4.83E-10 | 2.68E-09 | 520 | 375 |
| SLC41A1             | 0.268435444 | 4.94E-10 | 2.74E-09 | 520 | 520 |
| OBSL1               | 0.268406189 | 4.96E-10 | 2.75E-09 | 520 | 520 |
| IQGAP1              | 0.26833656  | 5.01E-10 | 2.78E-09 | 520 | 520 |
| TNFSF12-<br>TNFSF13 | 0.268326858 | 5.02E-10 | 2.78E-09 | 520 | 498 |
| TEX11               | 0.268283778 | 5.05E-10 | 2.80E-09 | 520 | 454 |
| 6-Sep               | 0.26818436  | 5.13E-10 | 2.84E-09 | 520 | 520 |
| LPPR3               | 0.268004933 | 5.27E-10 | 2.92E-09 | 520 | 326 |
| SLC25A32            | 0.267984663 | 5.29E-10 | 2.93E-09 | 520 | 520 |
| C20orf3             | 0.267982072 | 5.29E-10 | 2.93E-09 | 520 | 520 |
| ZCCHC14             | 0.267917277 | 5.35E-10 | 2.96E-09 | 520 | 520 |
| C1QB                | 0.267874033 | 5.38E-10 | 2.98E-09 | 520 | 520 |
| HSPB3               | 0.267785298 | 5.45E-10 | 3.01E-09 | 520 | 495 |
| OSBPL1A             | 0.26776889  | 5.47E-10 | 3.02E-09 | 520 | 520 |
| MTDH                | 0.267679221 | 5.54E-10 | 3.06E-09 | 520 | 520 |
| C17orf72            | 0.267627382 | 5.59E-10 | 3.08E-09 | 520 | 519 |
| NAIP                | 0.267507994 | 5.69E-10 | 3.14E-09 | 520 | 519 |
| MGC2752             | 0.267451646 | 5.74E-10 | 3.16E-09 | 520 | 520 |
| FBXW8               | 0.267389449 | 5.79E-10 | 3.19E-09 | 520 | 520 |
| STAB2               | 0.267352368 | 5.83E-10 | 3.21E-09 | 520 | 419 |
| DNAJC5B             | 0.267271072 | 5.90E-10 | 3.24E-09 | 520 | 466 |
| MAP1LC3C            | 0.267248396 | 5.92E-10 | 3.25E-09 | 520 | 449 |
| SEC24A              | 0.267243648 | 5.93E-10 | 3.25E-09 | 520 | 520 |
| ZNF69               | 0.267112806 | 6.04E-10 | 3.31E-09 | 520 | 517 |
| APBA1               | 0.266800403 | 6.34E-10 | 3.48E-09 | 520 | 519 |
| TMEM181             | 0.266796651 | 6.34E-10 | 3.48E-09 | 520 | 520 |
| TMEM231             | 0.266796053 | 6.34E-10 | 3.48E-09 | 520 | 520 |
| HSN2                | 0.266721748 | 6.42E-10 | 3.51E-09 | 520 | 513 |
| CXCR7               | 0.266719179 | 6.42E-10 | 3.52E-09 | 520 | 520 |
| HIVEP3              | 0.266591019 | 6.55E-10 | 3.58E-09 | 520 | 520 |
| CXorf21             | 0.266459239 | 6.68E-10 | 3.65E-09 | 520 | 517 |
| PIP4K2A             | 0.266413803 | 6.72E-10 | 3.67E-09 | 520 | 520 |
| DISP1               | 0.266238048 | 6.91E-10 | 3.77E-09 | 520 | 519 |
| 8-Mar               | 0.266204057 | 6.94E-10 | 3.79E-09 | 520 | 520 |
| STAC2               | 0.266172638 | 6.98E-10 | 3.81E-09 | 520 | 500 |
| RNASE6              | 0.266126513 | 7.02E-10 | 3.83E-09 | 520 | 520 |
| COPG                | 0.266009094 | 7.15E-10 | 3.90E-09 | 520 | 520 |
| C1orf95             | 0.265975706 | 7.19E-10 | 3.92E-09 | 520 | 477 |
| C20orf160           | 0.265953094 | 7.21E-10 | 3.93E-09 | 520 | 520 |
| KCNG2               | 0.26574822  | 7.44E-10 | 4.05E-09 | 520 | 431 |
| ZBTB16              | 0.265476708 | 7.75E-10 | 4.21E-09 | 520 | 467 |

|           |             |          |          |     |     |
|-----------|-------------|----------|----------|-----|-----|
| AP2A2     | 0.265454116 | 7.78E-10 | 4.23E-09 | 520 | 520 |
| TTC28     | 0.265363588 | 7.89E-10 | 4.28E-09 | 520 | 520 |
| SEC14L2   | 0.265292459 | 7.97E-10 | 4.33E-09 | 520 | 520 |
| TCF7L2    | 0.265257193 | 8.01E-10 | 4.35E-09 | 520 | 520 |
| NPTXR     | 0.265232561 | 8.04E-10 | 4.36E-09 | 520 | 519 |
| HVCN1     | 0.265166443 | 8.12E-10 | 4.40E-09 | 520 | 520 |
| ST8SIA1   | 0.265074738 | 8.24E-10 | 4.46E-09 | 520 | 520 |
| CPVL      | 0.265059191 | 8.26E-10 | 4.47E-09 | 520 | 520 |
| FAM10A4   | 0.265029499 | 8.30E-10 | 4.49E-09 | 520 | 520 |
| GIMAP4    | 0.265026048 | 8.30E-10 | 4.49E-09 | 520 | 520 |
| LY6H      | 0.264976478 | 8.36E-10 | 4.52E-09 | 520 | 482 |
| C4orf39   | 0.264971485 | 8.37E-10 | 4.53E-09 | 520 | 444 |
| COL27A1   | 0.264943728 | 8.40E-10 | 4.54E-09 | 520 | 520 |
| TAOK1     | 0.264943608 | 8.40E-10 | 4.54E-09 | 520 | 520 |
| SNX27     | 0.264929795 | 8.42E-10 | 4.55E-09 | 520 | 520 |
| ZNF610    | 0.264904718 | 8.45E-10 | 4.57E-09 | 520 | 508 |
| REL       | 0.264876878 | 8.49E-10 | 4.58E-09 | 520 | 520 |
| PID1      | 0.264646647 | 8.79E-10 | 4.74E-09 | 520 | 520 |
| PCDHGA7   | 0.264631917 | 8.81E-10 | 4.75E-09 | 520 | 502 |
| LRRN1     | 0.264629199 | 8.81E-10 | 4.75E-09 | 520 | 507 |
| GYG2      | 0.264452152 | 9.05E-10 | 4.88E-09 | 520 | 519 |
| ZBTB41    | 0.264448565 | 9.06E-10 | 4.88E-09 | 520 | 520 |
| RAB5C     | 0.264391636 | 9.13E-10 | 4.92E-09 | 520 | 520 |
| C9orf21   | 0.264271269 | 9.30E-10 | 5.00E-09 | 520 | 520 |
| UTS2R     | 0.264229255 | 9.36E-10 | 5.03E-09 | 520 | 313 |
| LOC650623 | 0.264123917 | 9.51E-10 | 5.11E-09 | 520 | 515 |
| LOC400804 | 0.264102685 | 9.54E-10 | 5.12E-09 | 520 | 189 |
| PCDHB12   | 0.263957275 | 9.75E-10 | 5.23E-09 | 520 | 520 |
| SPHK1     | 0.263913921 | 9.82E-10 | 5.26E-09 | 520 | 520 |
| GP5       | 0.263763721 | 1.00E-09 | 5.37E-09 | 520 | 429 |
| RAB39     | 0.263750863 | 1.01E-09 | 5.38E-09 | 520 | 480 |
| RAD54L2   | 0.263733409 | 1.01E-09 | 5.39E-09 | 520 | 520 |
| ZNF568    | 0.263729378 | 1.01E-09 | 5.39E-09 | 520 | 518 |
| IKZF4     | 0.263726194 | 1.01E-09 | 5.39E-09 | 520 | 520 |
| MICALCL   | 0.263717983 | 1.01E-09 | 5.40E-09 | 520 | 519 |
| GRPR      | 0.263647495 | 1.02E-09 | 5.46E-09 | 520 | 445 |
| IL3RA     | 0.263623259 | 1.03E-09 | 5.47E-09 | 520 | 520 |
| PRDM6     | 0.263568655 | 1.03E-09 | 5.52E-09 | 520 | 516 |
| ZNF319    | 0.263391589 | 1.06E-09 | 5.66E-09 | 520 | 520 |
| HTR7P1    | 0.263338365 | 1.07E-09 | 5.70E-09 | 520 | 520 |
| LOC92249  | 0.26330732  | 1.08E-09 | 5.72E-09 | 520 | 520 |
| S100A1    | 0.263303031 | 1.08E-09 | 5.72E-09 | 520 | 520 |
| NTN1      | 0.263249441 | 1.08E-09 | 5.77E-09 | 520 | 520 |
| PARP11    | 0.263229996 | 1.09E-09 | 5.78E-09 | 520 | 520 |
| ZDHHHC8P1 | 0.263220043 | 1.09E-09 | 5.79E-09 | 520 | 505 |
| ZNF609    | 0.263214213 | 1.09E-09 | 5.79E-09 | 520 | 520 |

|              |             |          |          |     |     |
|--------------|-------------|----------|----------|-----|-----|
| PHF3         | 0.263209078 | 1.09E-09 | 5.79E-09 | 520 | 520 |
| PPP1R12A     | 0.263201926 | 1.09E-09 | 5.80E-09 | 520 | 520 |
| SCUBE2       | 0.263142919 | 1.10E-09 | 5.85E-09 | 520 | 519 |
| DYRK3        | 0.263135763 | 1.10E-09 | 5.85E-09 | 520 | 520 |
| NLN          | 0.263134634 | 1.10E-09 | 5.85E-09 | 520 | 520 |
| TGFBRAP1     | 0.26301324  | 1.12E-09 | 5.95E-09 | 520 | 520 |
| PDPR         | 0.262964614 | 1.13E-09 | 5.99E-09 | 520 | 520 |
| SP4          | 0.262877422 | 1.15E-09 | 6.07E-09 | 520 | 520 |
| GALNT5       | 0.262761923 | 1.17E-09 | 6.17E-09 | 520 | 519 |
| FSIP1        | 0.262736964 | 1.17E-09 | 6.19E-09 | 520 | 514 |
| PCDHGB1      | 0.262724503 | 1.17E-09 | 6.20E-09 | 520 | 507 |
| IRAK3        | 0.262585223 | 1.20E-09 | 6.33E-09 | 520 | 520 |
| SHD          | 0.262576267 | 1.20E-09 | 6.34E-09 | 520 | 479 |
| ZNF549       | 0.262540884 | 1.21E-09 | 6.37E-09 | 520 | 520 |
| GTF2A1       | 0.262449013 | 1.22E-09 | 6.46E-09 | 520 | 520 |
| TMED10P1     | 0.262386555 | 1.23E-09 | 6.52E-09 | 520 | 520 |
| RHOB         | 0.262324758 | 1.25E-09 | 6.57E-09 | 520 | 520 |
| MYO1B        | 0.26227005  | 1.26E-09 | 6.63E-09 | 520 | 520 |
| SNX12        | 0.262253498 | 1.26E-09 | 6.64E-09 | 520 | 520 |
| HELZ         | 0.262211136 | 1.27E-09 | 6.68E-09 | 520 | 520 |
| BCL9         | 0.262014861 | 1.30E-09 | 6.87E-09 | 520 | 520 |
| GRM2         | 0.261998068 | 1.31E-09 | 6.89E-09 | 520 | 516 |
| LUZP1        | 0.261884287 | 1.33E-09 | 7.00E-09 | 520 | 520 |
| CCR4         | 0.26188217  | 1.33E-09 | 7.00E-09 | 520 | 503 |
| UBR5         | 0.261869776 | 1.33E-09 | 7.01E-09 | 520 | 520 |
| CMTM6        | 0.261825196 | 1.34E-09 | 7.06E-09 | 520 | 520 |
| EDEM1        | 0.261817499 | 1.34E-09 | 7.06E-09 | 520 | 520 |
| FGF2         | 0.261758315 | 1.36E-09 | 7.12E-09 | 520 | 519 |
| TREM1        | 0.261716508 | 1.36E-09 | 7.16E-09 | 520 | 520 |
| TRPA1        | 0.261706355 | 1.37E-09 | 7.17E-09 | 520 | 511 |
| NME7         | 0.261689824 | 1.37E-09 | 7.19E-09 | 520 | 520 |
| IL18R1       | 0.261653919 | 1.38E-09 | 7.23E-09 | 520 | 520 |
| PLEKHG4B     | 0.261645778 | 1.38E-09 | 7.23E-09 | 520 | 520 |
| TMF1         | 0.261601156 | 1.39E-09 | 7.28E-09 | 520 | 520 |
| TMEM195      | 0.26152614  | 1.40E-09 | 7.36E-09 | 520 | 411 |
| CCDC110      | 0.261488629 | 1.41E-09 | 7.39E-09 | 520 | 505 |
| SCRN1        | 0.261287672 | 1.45E-09 | 7.61E-09 | 520 | 520 |
| DERL1        | 0.261250146 | 1.46E-09 | 7.65E-09 | 520 | 520 |
| GLT1D1       | 0.261249424 | 1.46E-09 | 7.65E-09 | 520 | 517 |
| ZNF880       | 0.261156114 | 1.48E-09 | 7.75E-09 | 520 | 519 |
| GFPT1        | 0.261136965 | 1.49E-09 | 7.77E-09 | 520 | 520 |
| ASAP2        | 0.261012197 | 1.52E-09 | 7.92E-09 | 520 | 520 |
| NNAT         | 0.260998442 | 1.52E-09 | 7.93E-09 | 520 | 519 |
| LRRTM2       | 0.260881105 | 1.55E-09 | 8.06E-09 | 520 | 510 |
| CBX6         | 0.260849832 | 1.55E-09 | 8.10E-09 | 520 | 520 |
| LOC100190939 | 0.260764495 | 1.57E-09 | 8.20E-09 | 520 | 520 |

|            |             |          |          |     |     |
|------------|-------------|----------|----------|-----|-----|
| RSF1       | 0.260712965 | 1.58E-09 | 8.26E-09 | 520 | 520 |
| CXCL5      | 0.260676333 | 1.59E-09 | 8.30E-09 | 520 | 514 |
| IGDCC3     | 0.260659362 | 1.60E-09 | 8.32E-09 | 520 | 355 |
| LONP2      | 0.26065035  | 1.60E-09 | 8.32E-09 | 520 | 520 |
| CCL7       | 0.260650335 | 1.60E-09 | 8.32E-09 | 520 | 490 |
| NR3C1      | 0.260630544 | 1.60E-09 | 8.35E-09 | 520 | 520 |
| LOC151534  | 0.260537236 | 1.63E-09 | 8.46E-09 | 520 | 520 |
| RAB7L1     | 0.260519639 | 1.63E-09 | 8.48E-09 | 520 | 520 |
| SELPLG     | 0.260488917 | 1.64E-09 | 8.51E-09 | 520 | 520 |
| C2orf89    | 0.260459127 | 1.65E-09 | 8.55E-09 | 520 | 519 |
| PSG5       | 0.260452372 | 1.65E-09 | 8.56E-09 | 520 | 397 |
| LPGAT1     | 0.26044216  | 1.65E-09 | 8.57E-09 | 520 | 520 |
| PPP1R9B    | 0.260384007 | 1.66E-09 | 8.64E-09 | 520 | 520 |
| TECPR1     | 0.26028945  | 1.69E-09 | 8.76E-09 | 520 | 520 |
| ANGEL1     | 0.260262604 | 1.69E-09 | 8.79E-09 | 520 | 520 |
| NCRNA00052 | 0.260204681 | 1.71E-09 | 8.85E-09 | 520 | 258 |
| HIPK4      | 0.260132271 | 1.73E-09 | 8.95E-09 | 520 | 495 |
| EPOR       | 0.260027738 | 1.75E-09 | 9.08E-09 | 520 | 520 |
| NFE2L1     | 0.259910098 | 1.78E-09 | 9.24E-09 | 520 | 520 |
| SPEG       | 0.259819133 | 1.81E-09 | 9.36E-09 | 520 | 520 |
| RAP2A      | 0.259798136 | 1.81E-09 | 9.39E-09 | 520 | 520 |
| LRRN2      | 0.259763493 | 1.82E-09 | 9.43E-09 | 520 | 518 |
| SHC1       | 0.259727578 | 1.83E-09 | 9.48E-09 | 520 | 520 |
| C9orf30    | 0.25970718  | 1.84E-09 | 9.50E-09 | 520 | 520 |
| FXYD1      | 0.259624456 | 1.86E-09 | 9.61E-09 | 520 | 520 |
| SLC18A2    | 0.259563661 | 1.88E-09 | 9.70E-09 | 520 | 506 |
| 7-Sep      | 0.25953438  | 1.89E-09 | 9.73E-09 | 520 | 520 |
| RGAG1      | 0.259513753 | 1.89E-09 | 9.76E-09 | 520 | 480 |
| USP12      | 0.259512379 | 1.89E-09 | 9.76E-09 | 520 | 520 |
| C14orf45   | 0.259490603 | 1.90E-09 | 9.79E-09 | 520 | 520 |
| ZMAT3      | 0.259460023 | 1.91E-09 | 9.83E-09 | 520 | 520 |
| KLHL34     | 0.259456582 | 1.91E-09 | 9.83E-09 | 520 | 367 |
| ZBED1      | 0.259440178 | 1.91E-09 | 9.85E-09 | 520 | 520 |
| FLII       | 0.259431556 | 1.92E-09 | 9.86E-09 | 520 | 520 |
| STAT4      | 0.259375051 | 1.93E-09 | 9.94E-09 | 520 | 520 |
| RNF216L    | 0.259361599 | 1.94E-09 | 9.96E-09 | 520 | 520 |
| RGS11      | 0.259344917 | 1.94E-09 | 9.98E-09 | 520 | 519 |
| MPRIP      | 0.259260459 | 1.96E-09 | 1.01E-08 | 520 | 520 |
| GADD45B    | 0.259239274 | 1.97E-09 | 1.01E-08 | 520 | 520 |
| KIAA1033   | 0.259207105 | 1.98E-09 | 1.02E-08 | 520 | 520 |
| KRBA2      | 0.259200507 | 1.98E-09 | 1.02E-08 | 520 | 518 |
| RET        | 0.259194703 | 1.98E-09 | 1.02E-08 | 520 | 520 |
| RIN2       | 0.259192908 | 1.98E-09 | 1.02E-08 | 520 | 520 |
| LRRRC39    | 0.259143166 | 2.00E-09 | 1.03E-08 | 520 | 501 |
| PLDN       | 0.259029369 | 2.03E-09 | 1.04E-08 | 520 | 520 |
| C2orf166   | 0.258909486 | 2.07E-09 | 1.06E-08 | 520 | 217 |



|              |             |          |          |     |     |
|--------------|-------------|----------|----------|-----|-----|
| GLP2R        | 0.258884012 | 2.08E-09 | 1.06E-08 | 520 | 176 |
| CC2D2A       | 0.258841272 | 2.09E-09 | 1.07E-08 | 520 | 520 |
| DDN          | 0.258771243 | 2.11E-09 | 1.08E-08 | 520 | 520 |
| IGFL3        | 0.258728068 | 2.12E-09 | 1.09E-08 | 520 | 435 |
| PEX26        | 0.258716995 | 2.13E-09 | 1.09E-08 | 520 | 520 |
| RGPD3        | 0.258683418 | 2.14E-09 | 1.09E-08 | 520 | 520 |
| TMEM131      | 0.258405677 | 2.23E-09 | 1.14E-08 | 520 | 520 |
| SORBS2       | 0.258382311 | 2.24E-09 | 1.14E-08 | 520 | 520 |
| CCDC82       | 0.25826964  | 2.27E-09 | 1.16E-08 | 520 | 520 |
| ARHGAP22     | 0.258202944 | 2.30E-09 | 1.17E-08 | 520 | 520 |
| TRRAP        | 0.258168276 | 2.31E-09 | 1.17E-08 | 520 | 520 |
| MUSTN1       | 0.258129602 | 2.32E-09 | 1.18E-08 | 520 | 520 |
| SLC7A6       | 0.258121836 | 2.32E-09 | 1.18E-08 | 520 | 520 |
| CBLN4        | 0.25802441  | 2.36E-09 | 1.20E-08 | 520 | 261 |
| ABCC4        | 0.258010257 | 2.36E-09 | 1.20E-08 | 520 | 520 |
| DFNA5        | 0.257999659 | 2.37E-09 | 1.20E-08 | 520 | 520 |
| SEZ6L        | 0.25794688  | 2.38E-09 | 1.21E-08 | 520 | 382 |
| FERMT3       | 0.257871069 | 2.41E-09 | 1.22E-08 | 520 | 520 |
| SNURF        | 0.257869007 | 2.41E-09 | 1.22E-08 | 520 | 451 |
| DMP1         | 0.257789115 | 2.44E-09 | 1.24E-08 | 520 | 424 |
| IPW          | 0.257748899 | 2.45E-09 | 1.24E-08 | 520 | 519 |
| C9orf44      | 0.257710212 | 2.47E-09 | 1.25E-08 | 520 | 320 |
| MLL5         | 0.257636242 | 2.49E-09 | 1.26E-08 | 520 | 520 |
| SMO          | 0.257546064 | 2.53E-09 | 1.28E-08 | 520 | 520 |
| PCDHB16      | 0.257494537 | 2.55E-09 | 1.29E-08 | 520 | 520 |
| SNX18        | 0.257481292 | 2.55E-09 | 1.29E-08 | 520 | 520 |
| EIF5A2       | 0.257446411 | 2.57E-09 | 1.30E-08 | 520 | 520 |
| TCEAL3       | 0.257318139 | 2.61E-09 | 1.32E-08 | 520 | 520 |
| NBL1         | 0.257299831 | 2.62E-09 | 1.32E-08 | 520 | 520 |
| FAM78A       | 0.257244807 | 2.64E-09 | 1.33E-08 | 520 | 520 |
| ZCCHC11      | 0.257235863 | 2.65E-09 | 1.34E-08 | 520 | 520 |
| TTC37        | 0.257207016 | 2.66E-09 | 1.34E-08 | 520 | 520 |
| FAM7A3       | 0.257194393 | 2.66E-09 | 1.34E-08 | 520 | 456 |
| BTN2A1       | 0.257104439 | 2.70E-09 | 1.36E-08 | 520 | 520 |
| RGP1         | 0.257089103 | 2.70E-09 | 1.36E-08 | 520 | 520 |
| CABIN1       | 0.257020846 | 2.73E-09 | 1.38E-08 | 520 | 520 |
| TPCN1        | 0.256892    | 2.78E-09 | 1.40E-08 | 520 | 520 |
| ADAMTS8      | 0.256877793 | 2.79E-09 | 1.40E-08 | 520 | 493 |
| ADAM17       | 0.256821506 | 2.81E-09 | 1.42E-08 | 520 | 520 |
| PHYH         | 0.256808756 | 2.82E-09 | 1.42E-08 | 520 | 520 |
| REP15        | 0.256784999 | 2.83E-09 | 1.42E-08 | 520 | 520 |
| LOC100130872 | 0.256758424 | 2.84E-09 | 1.43E-08 | 520 | 520 |
| FRMPD4       | 0.256700048 | 2.86E-09 | 1.44E-08 | 520 | 352 |
| TLR6         | 0.25661862  | 2.90E-09 | 1.45E-08 | 520 | 518 |
| PDE4D        | 0.256612818 | 2.90E-09 | 1.46E-08 | 520 | 520 |
| DIRAS3       | 0.256514728 | 2.94E-09 | 1.47E-08 | 520 | 519 |

|              |             |          |          |     |     |
|--------------|-------------|----------|----------|-----|-----|
| TCEAL8       | 0.256486086 | 2.95E-09 | 1.48E-08 | 520 | 520 |
| ZMYM4        | 0.256484239 | 2.95E-09 | 1.48E-08 | 520 | 520 |
| MORF4        | 0.256461518 | 2.96E-09 | 1.48E-08 | 520 | 519 |
| ASB15        | 0.256429332 | 2.98E-09 | 1.49E-08 | 520 | 234 |
| MYO9A        | 0.256401473 | 2.99E-09 | 1.50E-08 | 520 | 520 |
| LOC642852    | 0.256399305 | 2.99E-09 | 1.50E-08 | 520 | 520 |
| PACS1        | 0.25639299  | 2.99E-09 | 1.50E-08 | 520 | 520 |
| WDFY3        | 0.256383298 | 3.00E-09 | 1.50E-08 | 520 | 520 |
| CCR3         | 0.256378836 | 3.00E-09 | 1.50E-08 | 520 | 461 |
| EVI2B        | 0.256310712 | 3.03E-09 | 1.51E-08 | 520 | 520 |
| LIFR         | 0.256304098 | 3.03E-09 | 1.51E-08 | 520 | 520 |
| LOC653786    | 0.256269855 | 3.05E-09 | 1.52E-08 | 520 | 463 |
| FAM38A       | 0.256224495 | 3.07E-09 | 1.53E-08 | 520 | 520 |
| TNNC2        | 0.256145118 | 3.10E-09 | 1.55E-08 | 520 | 512 |
| ZFAND3       | 0.256047839 | 3.15E-09 | 1.57E-08 | 520 | 520 |
| OPN1SW       | 0.256027181 | 3.16E-09 | 1.57E-08 | 520 | 438 |
| SFTA1P       | 0.255973326 | 3.18E-09 | 1.59E-08 | 520 | 486 |
| PLEK         | 0.25582451  | 3.25E-09 | 1.62E-08 | 520 | 520 |
| BBX          | 0.255821215 | 3.25E-09 | 1.62E-08 | 520 | 520 |
| ZBTB4        | 0.255647513 | 3.34E-09 | 1.66E-08 | 520 | 520 |
| PNMAL2       | 0.255645076 | 3.34E-09 | 1.66E-08 | 520 | 520 |
| PRLR         | 0.255579757 | 3.37E-09 | 1.68E-08 | 520 | 512 |
| ZNF627       | 0.255573269 | 3.37E-09 | 1.68E-08 | 520 | 520 |
| PLAGL1       | 0.25554795  | 3.38E-09 | 1.68E-08 | 520 | 520 |
| TNFAIP3      | 0.255492707 | 3.41E-09 | 1.69E-08 | 520 | 520 |
| RAB20        | 0.255395523 | 3.46E-09 | 1.72E-08 | 520 | 520 |
| LOC100192378 | 0.255201642 | 3.56E-09 | 1.77E-08 | 520 | 295 |
| CAMK4        | 0.255166675 | 3.58E-09 | 1.77E-08 | 520 | 513 |
| SCMH1        | 0.255105005 | 3.61E-09 | 1.79E-08 | 520 | 520 |
| POTEF        | 0.255021265 | 3.65E-09 | 1.81E-08 | 520 | 520 |
| ATP1B2       | 0.254767102 | 3.79E-09 | 1.88E-08 | 520 | 514 |
| ZDHHC7       | 0.254756113 | 3.80E-09 | 1.88E-08 | 520 | 520 |
| DHX33        | 0.254738869 | 3.81E-09 | 1.88E-08 | 520 | 520 |
| BAALC        | 0.254597133 | 3.88E-09 | 1.92E-08 | 520 | 520 |
| BOD1L        | 0.254583753 | 3.89E-09 | 1.92E-08 | 520 | 520 |
| TSPYL3       | 0.254516641 | 3.93E-09 | 1.94E-08 | 520 | 497 |
| LOC100130331 | 0.254514215 | 3.93E-09 | 1.94E-08 | 520 | 519 |
| UNC5B        | 0.254482659 | 3.95E-09 | 1.95E-08 | 520 | 520 |
| SPTB         | 0.254403644 | 3.99E-09 | 1.97E-08 | 520 | 520 |
| SNX25        | 0.254366325 | 4.02E-09 | 1.98E-08 | 520 | 520 |
| SORL1        | 0.254338819 | 4.03E-09 | 1.99E-08 | 520 | 520 |
| ACO1         | 0.254314887 | 4.05E-09 | 1.99E-08 | 520 | 520 |
| EGFR         | 0.254250481 | 4.08E-09 | 2.01E-08 | 520 | 520 |
| PYGM         | 0.254206937 | 4.11E-09 | 2.02E-08 | 520 | 516 |
| SLC4A3       | 0.254176831 | 4.13E-09 | 2.03E-08 | 520 | 520 |
| RANBP3L      | 0.254059955 | 4.20E-09 | 2.06E-08 | 520 | 306 |

|           |             |          |          |     |     |
|-----------|-------------|----------|----------|-----|-----|
| MDGA1     | 0.254017747 | 4.22E-09 | 2.08E-08 | 520 | 520 |
| RPSAP52   | 0.253865536 | 4.32E-09 | 2.12E-08 | 520 | 510 |
| STT3B     | 0.253838293 | 4.33E-09 | 2.13E-08 | 520 | 520 |
| ARL2BP    | 0.253808273 | 4.35E-09 | 2.14E-08 | 520 | 520 |
| ACTR2     | 0.253803807 | 4.36E-09 | 2.14E-08 | 520 | 520 |
| CKMT2     | 0.253700018 | 4.42E-09 | 2.17E-08 | 520 | 452 |
| GAB3      | 0.253662143 | 4.45E-09 | 2.18E-08 | 520 | 520 |
| DYNC1LI2  | 0.25356167  | 4.51E-09 | 2.21E-08 | 520 | 520 |
| ACTB      | 0.253547801 | 4.52E-09 | 2.21E-08 | 520 | 520 |
| ZPLD1     | 0.253430037 | 4.60E-09 | 2.25E-08 | 520 | 445 |
| KCNK13    | 0.253401317 | 4.62E-09 | 2.26E-08 | 520 | 520 |
| GMPR      | 0.25315877  | 4.78E-09 | 2.34E-08 | 520 | 520 |
| C22orf26  | 0.252999756 | 4.89E-09 | 2.39E-08 | 520 | 519 |
| SERP2     | 0.252989035 | 4.90E-09 | 2.39E-08 | 520 | 510 |
| MBNL2     | 0.252976774 | 4.91E-09 | 2.39E-08 | 520 | 520 |
| HS1BP3    | 0.252947151 | 4.93E-09 | 2.40E-08 | 520 | 520 |
| ZNF445    | 0.252909583 | 4.95E-09 | 2.42E-08 | 520 | 520 |
| GALC      | 0.252827835 | 5.01E-09 | 2.44E-08 | 520 | 520 |
| RGN       | 0.252608744 | 5.17E-09 | 2.52E-08 | 520 | 507 |
| CRISPLD1  | 0.252580449 | 5.19E-09 | 2.53E-08 | 520 | 520 |
| ACP2      | 0.25253694  | 5.23E-09 | 2.55E-08 | 520 | 520 |
| SF3A1     | 0.25231532  | 5.40E-09 | 2.62E-08 | 520 | 520 |
| GCNT1     | 0.252293256 | 5.41E-09 | 2.63E-08 | 520 | 520 |
| MYO5A     | 0.252114355 | 5.55E-09 | 2.70E-08 | 520 | 520 |
| PSD2      | 0.252082914 | 5.58E-09 | 2.71E-08 | 520 | 455 |
| MC1R      | 0.252072841 | 5.59E-09 | 2.71E-08 | 520 | 520 |
| SPSB4     | 0.252023807 | 5.63E-09 | 2.73E-08 | 520 | 511 |
| PEBP4     | 0.251984982 | 5.66E-09 | 2.74E-08 | 520 | 379 |
| ELK1      | 0.251979516 | 5.66E-09 | 2.75E-08 | 520 | 520 |
| MGC42105  | 0.25192188  | 5.71E-09 | 2.77E-08 | 520 | 518 |
| GDF5      | 0.251918975 | 5.71E-09 | 2.77E-08 | 520 | 460 |
| MYO1F     | 0.251876316 | 5.75E-09 | 2.78E-08 | 520 | 520 |
| GPR182    | 0.251867436 | 5.75E-09 | 2.79E-08 | 520 | 422 |
| RGMB      | 0.251843716 | 5.77E-09 | 2.79E-08 | 520 | 520 |
| MAN1A2    | 0.251706507 | 5.89E-09 | 2.85E-08 | 520 | 520 |
| TRDMT1    | 0.251701805 | 5.89E-09 | 2.85E-08 | 520 | 520 |
| PAPPA2    | 0.251690143 | 5.90E-09 | 2.85E-08 | 520 | 410 |
| ANO1      | 0.251630569 | 5.95E-09 | 2.87E-08 | 520 | 520 |
| NRIP1     | 0.251587813 | 5.99E-09 | 2.89E-08 | 520 | 520 |
| LOC283267 | 0.251567099 | 6.01E-09 | 2.90E-08 | 520 | 520 |
| CRTAC1    | 0.251511819 | 6.05E-09 | 2.92E-08 | 520 | 514 |
| EPHA5     | 0.25145179  | 6.11E-09 | 2.94E-08 | 520 | 293 |
| TBC1D9    | 0.251344678 | 6.20E-09 | 2.99E-08 | 520 | 520 |
| THRA      | 0.251248725 | 6.28E-09 | 3.03E-08 | 520 | 520 |
| LOC90586  | 0.251245594 | 6.29E-09 | 3.03E-08 | 520 | 308 |
| TNRC18    | 0.251209038 | 6.32E-09 | 3.04E-08 | 520 | 520 |

|           |             |          |          |     |     |
|-----------|-------------|----------|----------|-----|-----|
| SLC39A1   | 0.251066624 | 6.45E-09 | 3.10E-08 | 520 | 520 |
| LRRN3     | 0.25081074  | 6.69E-09 | 3.21E-08 | 520 | 519 |
| CRY1      | 0.250766313 | 6.73E-09 | 3.23E-08 | 520 | 520 |
| ZSCAN20   | 0.250762272 | 6.74E-09 | 3.23E-08 | 520 | 520 |
| C7orf41   | 0.250637177 | 6.86E-09 | 3.29E-08 | 520 | 520 |
| HDGFRP3   | 0.250601068 | 6.89E-09 | 3.30E-08 | 520 | 520 |
| RHBDD1    | 0.250522962 | 6.97E-09 | 3.34E-08 | 520 | 520 |
| STAT5B    | 0.250399417 | 7.09E-09 | 3.39E-08 | 520 | 520 |
| LZTR1     | 0.250308224 | 7.19E-09 | 3.43E-08 | 520 | 520 |
| PABPC4L   | 0.250281454 | 7.21E-09 | 3.45E-08 | 520 | 514 |
| PHF20     | 0.250255041 | 7.24E-09 | 3.46E-08 | 520 | 520 |
| PRPF8     | 0.250188299 | 7.31E-09 | 3.49E-08 | 520 | 520 |
| FTH1      | 0.250150736 | 7.35E-09 | 3.51E-08 | 520 | 520 |
| HOXB2     | 0.250080373 | 7.42E-09 | 3.54E-08 | 520 | 520 |
| SLC25A24  | 0.250056871 | 7.45E-09 | 3.55E-08 | 520 | 520 |
| LRCH3     | 0.249954595 | 7.56E-09 | 3.60E-08 | 520 | 520 |
| FAM174B   | 0.249939194 | 7.57E-09 | 3.61E-08 | 520 | 520 |
| LONRF3    | 0.249829502 | 7.69E-09 | 3.66E-08 | 520 | 514 |
| BATF3     | 0.249816405 | 7.70E-09 | 3.67E-08 | 520 | 520 |
| TMEM184C  | 0.249777062 | 7.75E-09 | 3.69E-08 | 520 | 520 |
| TBC1D24   | 0.249713762 | 7.82E-09 | 3.72E-08 | 520 | 520 |
| SH2D3C    | 0.249683046 | 7.85E-09 | 3.73E-08 | 520 | 520 |
| SCN9A     | 0.249677703 | 7.86E-09 | 3.74E-08 | 520 | 518 |
| TRIM67    | 0.249666447 | 7.87E-09 | 3.74E-08 | 520 | 465 |
| REEP3     | 0.249582387 | 7.96E-09 | 3.78E-08 | 520 | 520 |
| YPEL2     | 0.24933948  | 8.24E-09 | 3.91E-08 | 520 | 520 |
| FAT1      | 0.249313746 | 8.27E-09 | 3.92E-08 | 520 | 520 |
| TMED7     | 0.249197293 | 8.41E-09 | 3.99E-08 | 520 | 520 |
| USPL1     | 0.249174584 | 8.44E-09 | 4.00E-08 | 520 | 520 |
| RASA4     | 0.249113685 | 8.51E-09 | 4.03E-08 | 520 | 520 |
| PDXDC1    | 0.249113319 | 8.51E-09 | 4.03E-08 | 520 | 520 |
| YTHDF3    | 0.249099759 | 8.53E-09 | 4.04E-08 | 520 | 520 |
| CLEC1A    | 0.249074238 | 8.56E-09 | 4.05E-08 | 520 | 520 |
| SLITRK6   | 0.249058808 | 8.58E-09 | 4.06E-08 | 520 | 515 |
| HSP90AB2P | 0.248960516 | 8.70E-09 | 4.11E-08 | 520 | 520 |
| USP9X     | 0.248930576 | 8.73E-09 | 4.13E-08 | 520 | 520 |
| ARHGAP24  | 0.248844871 | 8.84E-09 | 4.18E-08 | 520 | 519 |
| SEMA6C    | 0.24876958  | 8.93E-09 | 4.22E-08 | 520 | 520 |
| YWHAG     | 0.248741656 | 8.97E-09 | 4.24E-08 | 520 | 520 |
| CD109     | 0.248741449 | 8.97E-09 | 4.24E-08 | 520 | 520 |
| FOXJ2     | 0.248704439 | 9.02E-09 | 4.26E-08 | 520 | 520 |
| CAMSAP1L1 | 0.248679333 | 9.05E-09 | 4.27E-08 | 520 | 520 |
| GRINA     | 0.248397075 | 9.42E-09 | 4.44E-08 | 520 | 520 |
| GRINL1A   | 0.248331951 | 9.50E-09 | 4.48E-08 | 520 | 520 |
| DLEU7     | 0.248320877 | 9.52E-09 | 4.48E-08 | 520 | 498 |
| PELO      | 0.248252041 | 9.61E-09 | 4.52E-08 | 520 | 520 |

|           |             |          |          |     |     |
|-----------|-------------|----------|----------|-----|-----|
| PIK3CD    | 0.248169111 | 9.72E-09 | 4.57E-08 | 520 | 520 |
| GALNTL1   | 0.248064947 | 9.87E-09 | 4.64E-08 | 520 | 515 |
| PPM1K     | 0.248006786 | 9.95E-09 | 4.68E-08 | 520 | 520 |
| PPAP2A    | 0.247974929 | 9.99E-09 | 4.70E-08 | 520 | 520 |
| LRRC59    | 0.247951503 | 1.00E-08 | 4.71E-08 | 520 | 520 |
| LRRC29    | 0.247927775 | 1.01E-08 | 4.72E-08 | 520 | 520 |
| ST5       | 0.247893448 | 1.01E-08 | 4.74E-08 | 520 | 520 |
| TNFRSF1B  | 0.24786342  | 1.02E-08 | 4.76E-08 | 520 | 520 |
| PSD3      | 0.247833946 | 1.02E-08 | 4.78E-08 | 520 | 520 |
| OLFML2A   | 0.247764423 | 1.03E-08 | 4.83E-08 | 520 | 520 |
| TCF21     | 0.247701915 | 1.04E-08 | 4.87E-08 | 520 | 307 |
| SYTL4     | 0.247700496 | 1.04E-08 | 4.87E-08 | 520 | 520 |
| UBFD1     | 0.247656927 | 1.05E-08 | 4.89E-08 | 520 | 520 |
| FZD8      | 0.247636264 | 1.05E-08 | 4.91E-08 | 520 | 519 |
| ZNF781    | 0.247599163 | 1.05E-08 | 4.93E-08 | 520 | 500 |
| ZNF284    | 0.247587134 | 1.06E-08 | 4.94E-08 | 520 | 517 |
| CHRNB1    | 0.247535534 | 1.06E-08 | 4.97E-08 | 520 | 520 |
| STXBP1    | 0.247525093 | 1.06E-08 | 4.98E-08 | 520 | 520 |
| APOC1     | 0.247495856 | 1.07E-08 | 5.00E-08 | 520 | 520 |
| FAM63B    | 0.247472761 | 1.07E-08 | 5.01E-08 | 520 | 520 |
| TFPI2     | 0.247443814 | 1.08E-08 | 5.03E-08 | 520 | 515 |
| C2orf27A  | 0.2473488   | 1.09E-08 | 5.10E-08 | 520 | 520 |
| PGBD1     | 0.24726423  | 1.10E-08 | 5.16E-08 | 520 | 520 |
| RGPD4     | 0.247037969 | 1.14E-08 | 5.31E-08 | 520 | 520 |
| PAQR8     | 0.24701369  | 1.14E-08 | 5.33E-08 | 520 | 520 |
| DBC1      | 0.246958504 | 1.15E-08 | 5.37E-08 | 520 | 475 |
| MSMP      | 0.246879033 | 1.17E-08 | 5.42E-08 | 520 | 519 |
| C9orf102  | 0.246840208 | 1.17E-08 | 5.45E-08 | 520 | 520 |
| COG5      | 0.246737825 | 1.19E-08 | 5.53E-08 | 520 | 520 |
| LOC654342 | 0.246708779 | 1.19E-08 | 5.55E-08 | 520 | 520 |
| CCR2      | 0.246680572 | 1.20E-08 | 5.57E-08 | 520 | 518 |
| PHOSPHO1  | 0.246677683 | 1.20E-08 | 5.57E-08 | 520 | 516 |
| GPR68     | 0.24667039  | 1.20E-08 | 5.57E-08 | 520 | 520 |
| NOTUM     | 0.246606783 | 1.21E-08 | 5.62E-08 | 520 | 519 |
| C1orf162  | 0.246517698 | 1.23E-08 | 5.69E-08 | 520 | 520 |
| C13orf31  | 0.24637221  | 1.25E-08 | 5.80E-08 | 520 | 520 |
| C6orf186  | 0.246314861 | 1.26E-08 | 5.84E-08 | 520 | 387 |
| JDP2      | 0.246241913 | 1.27E-08 | 5.90E-08 | 520 | 520 |
| ZNF331    | 0.246223964 | 1.28E-08 | 5.92E-08 | 520 | 520 |
| RICH2     | 0.246181866 | 1.28E-08 | 5.95E-08 | 520 | 520 |
| CARD8     | 0.246128353 | 1.29E-08 | 5.99E-08 | 520 | 520 |
| CTSS      | 0.246078968 | 1.30E-08 | 6.03E-08 | 520 | 520 |
| ITPR2     | 0.246044442 | 1.31E-08 | 6.06E-08 | 520 | 520 |
| MPZL1     | 0.245995959 | 1.32E-08 | 6.10E-08 | 520 | 520 |
| SLC4A7    | 0.245905838 | 1.34E-08 | 6.17E-08 | 520 | 520 |
| MAB21L2   | 0.245864944 | 1.34E-08 | 6.20E-08 | 520 | 369 |

|           |             |          |          |     |     |
|-----------|-------------|----------|----------|-----|-----|
| ASGR1     | 0.245862277 | 1.34E-08 | 6.20E-08 | 520 | 520 |
| TSHZ2     | 0.245855167 | 1.34E-08 | 6.20E-08 | 520 | 520 |
| CXCR4     | 0.24583455  | 1.35E-08 | 6.22E-08 | 520 | 520 |
| GPR65     | 0.245797281 | 1.36E-08 | 6.25E-08 | 520 | 520 |
| GGCX      | 0.245793485 | 1.36E-08 | 6.25E-08 | 520 | 520 |
| SLC39A7   | 0.24573639  | 1.37E-08 | 6.30E-08 | 520 | 520 |
| TMED2     | 0.245702205 | 1.37E-08 | 6.32E-08 | 520 | 520 |
| PKDCC     | 0.245595607 | 1.39E-08 | 6.41E-08 | 520 | 517 |
| ZSCAN23   | 0.245439565 | 1.42E-08 | 6.55E-08 | 520 | 468 |
| RRAS      | 0.245278406 | 1.46E-08 | 6.69E-08 | 520 | 520 |
| NPBWR1    | 0.245169456 | 1.48E-08 | 6.78E-08 | 520 | 453 |
| CRB1      | 0.244904652 | 1.53E-08 | 7.03E-08 | 520 | 351 |
| SPOCK3    | 0.2448758   | 1.54E-08 | 7.06E-08 | 520 | 460 |
| FKBP1AP1  | 0.244872283 | 1.54E-08 | 7.06E-08 | 520 | 519 |
| UBL3      | 0.244799848 | 1.56E-08 | 7.13E-08 | 520 | 520 |
| PAEP      | 0.244762329 | 1.57E-08 | 7.17E-08 | 520 | 476 |
| GULP1     | 0.244758354 | 1.57E-08 | 7.17E-08 | 520 | 519 |
| YY2       | 0.244645968 | 1.59E-08 | 7.28E-08 | 520 | 512 |
| MAPK8     | 0.244632414 | 1.59E-08 | 7.29E-08 | 520 | 519 |
| C10orf107 | 0.244560131 | 1.61E-08 | 7.36E-08 | 520 | 380 |
| AMMECR1L  | 0.244513766 | 1.62E-08 | 7.40E-08 | 520 | 520 |
| RAMP2     | 0.244457984 | 1.63E-08 | 7.46E-08 | 520 | 520 |
| WNK1      | 0.244409094 | 1.64E-08 | 7.50E-08 | 520 | 520 |
| ARMC2     | 0.244378368 | 1.65E-08 | 7.54E-08 | 520 | 520 |
| CADPS2    | 0.244234007 | 1.68E-08 | 7.69E-08 | 520 | 520 |
| TACC1     | 0.244189455 | 1.69E-08 | 7.73E-08 | 520 | 520 |
| FAM106C   | 0.244160488 | 1.70E-08 | 7.76E-08 | 520 | 441 |
| KCNG1     | 0.244108359 | 1.71E-08 | 7.81E-08 | 520 | 518 |
| CTSF      | 0.244063517 | 1.72E-08 | 7.86E-08 | 520 | 520 |
| ZNF362    | 0.243932762 | 1.76E-08 | 8.00E-08 | 520 | 520 |
| GFRA2     | 0.243905261 | 1.76E-08 | 8.03E-08 | 520 | 519 |
| ATF7IP    | 0.243841543 | 1.78E-08 | 8.09E-08 | 520 | 520 |
| DNASE1L1  | 0.24382076  | 1.78E-08 | 8.12E-08 | 520 | 520 |
| FAM91A1   | 0.243760471 | 1.80E-08 | 8.18E-08 | 520 | 520 |
| NOVA1     | 0.243748676 | 1.80E-08 | 8.19E-08 | 520 | 510 |
| NEK9      | 0.243704927 | 1.81E-08 | 8.24E-08 | 520 | 520 |
| NOS3      | 0.24364254  | 1.83E-08 | 8.31E-08 | 520 | 520 |
| TMEM65    | 0.243636043 | 1.83E-08 | 8.31E-08 | 520 | 520 |
| GNAS      | 0.243569894 | 1.85E-08 | 8.38E-08 | 520 | 520 |
| TCEAL6    | 0.243567462 | 1.85E-08 | 8.39E-08 | 520 | 519 |
| TMEM90A   | 0.2435587   | 1.85E-08 | 8.39E-08 | 520 | 420 |
| CCDC144C  | 0.24353324  | 1.86E-08 | 8.42E-08 | 520 | 398 |
| RAMP1     | 0.243512534 | 1.86E-08 | 8.44E-08 | 520 | 520 |
| PLEKHA9   | 0.243490036 | 1.87E-08 | 8.47E-08 | 520 | 520 |
| LOC645431 | 0.243416466 | 1.89E-08 | 8.55E-08 | 520 | 516 |
| DIRC3     | 0.243373587 | 1.90E-08 | 8.60E-08 | 520 | 515 |

|          |             |          |          |     |     |
|----------|-------------|----------|----------|-----|-----|
| TNFSF13  | 0.243354913 | 1.90E-08 | 8.62E-08 | 520 | 520 |
| C8orf46  | 0.24332166  | 1.91E-08 | 8.66E-08 | 520 | 465 |
| ITIH4    | 0.243253014 | 1.93E-08 | 8.74E-08 | 520 | 520 |
| RGL1     | 0.243232023 | 1.93E-08 | 8.76E-08 | 520 | 520 |
| SIGLEC14 | 0.243146451 | 1.96E-08 | 8.86E-08 | 520 | 502 |
| KIAA0947 | 0.243115395 | 1.97E-08 | 8.90E-08 | 520 | 520 |
| RIF1     | 0.243101804 | 1.97E-08 | 8.91E-08 | 520 | 520 |
| HAPLN1   | 0.243070051 | 1.98E-08 | 8.95E-08 | 520 | 519 |
| GAB2     | 0.243056778 | 1.98E-08 | 8.96E-08 | 520 | 520 |
| C9orf170 | 0.242958317 | 2.01E-08 | 9.07E-08 | 520 | 424 |
| R3HDML   | 0.242870254 | 2.03E-08 | 9.18E-08 | 520 | 81  |
| VDR      | 0.242849884 | 2.04E-08 | 9.21E-08 | 520 | 520 |
| TSKU     | 0.242659322 | 2.09E-08 | 9.44E-08 | 520 | 520 |
| APBB1IP  | 0.242637782 | 2.10E-08 | 9.47E-08 | 520 | 520 |
| CYP19A1  | 0.242612889 | 2.11E-08 | 9.50E-08 | 520 | 516 |
| RAB3B    | 0.242451232 | 2.15E-08 | 9.70E-08 | 520 | 484 |
| IPO5     | 0.242388823 | 2.17E-08 | 9.77E-08 | 520 | 520 |
| KISS1    | 0.242383049 | 2.17E-08 | 9.78E-08 | 520 | 365 |
| C6orf120 | 0.242379989 | 2.17E-08 | 9.78E-08 | 520 | 520 |
| ZNF225   | 0.242286351 | 2.20E-08 | 9.90E-08 | 520 | 520 |
| ANKRD53  | 0.242213452 | 2.23E-08 | 9.99E-08 | 520 | 513 |
| NPTN     | 0.242171625 | 2.24E-08 | 1.00E-07 | 520 | 520 |
| PLEKHA5  | 0.242087141 | 2.26E-08 | 1.02E-07 | 520 | 520 |
| SRGAP1   | 0.242010061 | 2.29E-08 | 1.03E-07 | 520 | 520 |
| ULK2     | 0.241973637 | 2.30E-08 | 1.03E-07 | 520 | 520 |
| DPP8     | 0.241936619 | 2.31E-08 | 1.03E-07 | 520 | 520 |
| ST8SIA5  | 0.241851264 | 2.34E-08 | 1.05E-07 | 520 | 470 |
| RERG     | 0.241804174 | 2.35E-08 | 1.05E-07 | 520 | 515 |
| PCDHB10  | 0.241684521 | 2.39E-08 | 1.07E-07 | 520 | 519 |
| FEZ2     | 0.241666749 | 2.40E-08 | 1.07E-07 | 520 | 520 |
| CD28     | 0.241601312 | 2.42E-08 | 1.08E-07 | 520 | 519 |
| TMOD4    | 0.241592866 | 2.42E-08 | 1.08E-07 | 520 | 484 |
| ZNF358   | 0.241591895 | 2.42E-08 | 1.08E-07 | 520 | 520 |
| ZNF134   | 0.241552742 | 2.44E-08 | 1.09E-07 | 520 | 520 |
| KIAA1715 | 0.241481934 | 2.46E-08 | 1.10E-07 | 520 | 520 |
| GRM4     | 0.24147433  | 2.46E-08 | 1.10E-07 | 520 | 498 |
| ENDOD1   | 0.241405815 | 2.49E-08 | 1.11E-07 | 520 | 520 |
| FYB      | 0.241348033 | 2.50E-08 | 1.12E-07 | 520 | 520 |
| TTC33    | 0.241311147 | 2.52E-08 | 1.12E-07 | 520 | 520 |
| CCKAR    | 0.241282276 | 2.53E-08 | 1.12E-07 | 520 | 315 |
| JPH4     | 0.241191097 | 2.56E-08 | 1.14E-07 | 520 | 513 |
| VASN     | 0.241186259 | 2.56E-08 | 1.14E-07 | 520 | 520 |
| NOTCH2   | 0.241151213 | 2.57E-08 | 1.14E-07 | 520 | 520 |
| P2RX6    | 0.241118956 | 2.58E-08 | 1.15E-07 | 520 | 519 |
| AFF4     | 0.240984964 | 2.63E-08 | 1.17E-07 | 520 | 520 |
| CASQ1    | 0.240917492 | 2.66E-08 | 1.18E-07 | 520 | 498 |

|           |             |          |          |     |     |
|-----------|-------------|----------|----------|-----|-----|
| ZCCHC12   | 0.24088679  | 2.67E-08 | 1.18E-07 | 520 | 486 |
| MGAT4A    | 0.240733543 | 2.72E-08 | 1.21E-07 | 520 | 520 |
| TNFRSF11B | 0.24070123  | 2.74E-08 | 1.21E-07 | 520 | 515 |
| NCSTN     | 0.240650683 | 2.75E-08 | 1.22E-07 | 520 | 520 |
| SIPA1L1   | 0.240463193 | 2.83E-08 | 1.25E-07 | 520 | 520 |
| KRTAP1-5  | 0.240403959 | 2.85E-08 | 1.26E-07 | 520 | 377 |
| OSTCL     | 0.240389506 | 2.85E-08 | 1.26E-07 | 520 | 520 |
| ADAMDEC1  | 0.240376079 | 2.86E-08 | 1.27E-07 | 520 | 516 |
| SLC2A5    | 0.240265622 | 2.90E-08 | 1.28E-07 | 520 | 520 |
| NRIP2     | 0.240215503 | 2.92E-08 | 1.29E-07 | 520 | 518 |
| KIF21B    | 0.240213714 | 2.92E-08 | 1.29E-07 | 520 | 520 |
| PXN       | 0.240161244 | 2.94E-08 | 1.30E-07 | 520 | 520 |
| CNTNAP3   | 0.240157818 | 2.95E-08 | 1.30E-07 | 520 | 519 |
| IGFL2     | 0.240036587 | 3.00E-08 | 1.32E-07 | 520 | 515 |
| ASXL2     | 0.240031919 | 3.00E-08 | 1.32E-07 | 520 | 520 |
| PLXNA1    | 0.239945203 | 3.03E-08 | 1.34E-07 | 520 | 520 |
| ROBO1     | 0.239917078 | 3.04E-08 | 1.34E-07 | 520 | 520 |
| MAPT      | 0.239870936 | 3.06E-08 | 1.35E-07 | 520 | 520 |
| PIK3AP1   | 0.239847367 | 3.07E-08 | 1.35E-07 | 520 | 520 |
| GPR135    | 0.239785463 | 3.10E-08 | 1.36E-07 | 520 | 517 |
| TMEM170B  | 0.239765265 | 3.11E-08 | 1.37E-07 | 520 | 520 |
| SEC63     | 0.239692757 | 3.14E-08 | 1.38E-07 | 520 | 520 |
| MICAL3    | 0.239686552 | 3.14E-08 | 1.38E-07 | 520 | 520 |
| GBE1      | 0.239619399 | 3.17E-08 | 1.39E-07 | 520 | 520 |
| NDST1     | 0.239608869 | 3.17E-08 | 1.39E-07 | 520 | 520 |
| LITAF     | 0.239515407 | 3.21E-08 | 1.41E-07 | 520 | 520 |
| PTPN11    | 0.239514256 | 3.22E-08 | 1.41E-07 | 520 | 520 |
| RSPH9     | 0.239427014 | 3.25E-08 | 1.43E-07 | 520 | 496 |
| FMN2      | 0.239363206 | 3.28E-08 | 1.44E-07 | 520 | 407 |
| PAPLN     | 0.23934832  | 3.29E-08 | 1.44E-07 | 520 | 520 |
| TMEM127   | 0.239338803 | 3.29E-08 | 1.44E-07 | 520 | 520 |
| MAPK4     | 0.239323757 | 3.30E-08 | 1.45E-07 | 520 | 467 |
| LASS6     | 0.239232586 | 3.34E-08 | 1.46E-07 | 520 | 520 |
| MLL       | 0.239094581 | 3.40E-08 | 1.49E-07 | 520 | 520 |
| GDF10     | 0.239073871 | 3.41E-08 | 1.49E-07 | 520 | 478 |
| DOCK5     | 0.239018102 | 3.44E-08 | 1.50E-07 | 520 | 520 |
| PTPLAD2   | 0.238916519 | 3.49E-08 | 1.52E-07 | 520 | 520 |
| C1QA      | 0.238881435 | 3.50E-08 | 1.53E-07 | 520 | 520 |
| FAM149B1  | 0.238776334 | 3.55E-08 | 1.55E-07 | 520 | 520 |
| MPEG1     | 0.238755414 | 3.56E-08 | 1.55E-07 | 520 | 520 |
| MTUS2     | 0.238735262 | 3.57E-08 | 1.56E-07 | 520 | 505 |
| MAGEE2    | 0.238728846 | 3.58E-08 | 1.56E-07 | 520 | 197 |
| SPATA9    | 0.238641107 | 3.62E-08 | 1.58E-07 | 520 | 499 |
| GABRD     | 0.238595959 | 3.64E-08 | 1.59E-07 | 520 | 517 |
| ATRX      | 0.23859157  | 3.64E-08 | 1.59E-07 | 520 | 520 |
| FAM167B   | 0.238583597 | 3.65E-08 | 1.59E-07 | 520 | 520 |



|           |             |          |          |     |     |
|-----------|-------------|----------|----------|-----|-----|
| PCDHGC5   | 0.238572845 | 3.65E-08 | 1.59E-07 | 520 | 506 |
| SYT16     | 0.238563995 | 3.66E-08 | 1.59E-07 | 520 | 382 |
| SAMSN1    | 0.238436549 | 3.72E-08 | 1.62E-07 | 520 | 520 |
| TECPR2    | 0.238375416 | 3.75E-08 | 1.63E-07 | 520 | 520 |
| PDS5B     | 0.238361898 | 3.76E-08 | 1.63E-07 | 520 | 520 |
| KLC2      | 0.238275872 | 3.80E-08 | 1.65E-07 | 520 | 520 |
| ME2       | 0.238150757 | 3.87E-08 | 1.68E-07 | 520 | 520 |
| ULBP3     | 0.238044287 | 3.92E-08 | 1.70E-07 | 520 | 520 |
| SCCPDH    | 0.238032097 | 3.93E-08 | 1.71E-07 | 520 | 520 |
| PBXIP1    | 0.237947003 | 3.97E-08 | 1.72E-07 | 520 | 520 |
| SLC2A11   | 0.237904707 | 4.00E-08 | 1.73E-07 | 520 | 520 |
| NINJ2     | 0.237837792 | 4.03E-08 | 1.75E-07 | 520 | 520 |
| HMGCLL1   | 0.237792743 | 4.06E-08 | 1.76E-07 | 520 | 292 |
| COL2A1    | 0.237732054 | 4.09E-08 | 1.77E-07 | 520 | 513 |
| ABRA      | 0.237701183 | 4.11E-08 | 1.78E-07 | 520 | 372 |
| PORCN     | 0.237597321 | 4.16E-08 | 1.80E-07 | 520 | 520 |
| OTOA      | 0.237555007 | 4.19E-08 | 1.81E-07 | 520 | 508 |
| MYADML2   | 0.237506245 | 4.22E-08 | 1.82E-07 | 520 | 431 |
| EDEM3     | 0.237477785 | 4.23E-08 | 1.83E-07 | 520 | 520 |
| ZNF175    | 0.237436062 | 4.26E-08 | 1.84E-07 | 520 | 519 |
| ZNF623    | 0.237317367 | 4.32E-08 | 1.87E-07 | 520 | 520 |
| LOC151162 | 0.237275711 | 4.35E-08 | 1.88E-07 | 520 | 520 |
| UGT2B4    | 0.23726171  | 4.36E-08 | 1.88E-07 | 520 | 140 |
| PCDH7     | 0.237230008 | 4.37E-08 | 1.89E-07 | 520 | 520 |
| SLC16A3   | 0.237193322 | 4.40E-08 | 1.90E-07 | 520 | 520 |
| ATP8B3    | 0.237150247 | 4.42E-08 | 1.91E-07 | 520 | 520 |
| C10orf114 | 0.23714922  | 4.42E-08 | 1.91E-07 | 520 | 520 |
| SAMD11    | 0.237136675 | 4.43E-08 | 1.91E-07 | 520 | 519 |
| GOLGA5    | 0.237105086 | 4.45E-08 | 1.92E-07 | 520 | 520 |
| MSI1      | 0.236959029 | 4.54E-08 | 1.95E-07 | 520 | 511 |
| PKIA      | 0.236943251 | 4.55E-08 | 1.96E-07 | 520 | 520 |
| DYNC111   | 0.236934281 | 4.55E-08 | 1.96E-07 | 520 | 517 |
| C20orf26  | 0.2368821   | 4.58E-08 | 1.97E-07 | 520 | 503 |
| B3GNT1    | 0.236874996 | 4.59E-08 | 1.97E-07 | 520 | 520 |
| PLEKHA3   | 0.23680537  | 4.63E-08 | 1.99E-07 | 520 | 520 |
| SP7       | 0.23680089  | 4.63E-08 | 1.99E-07 | 520 | 312 |
| ARX       | 0.236638088 | 4.74E-08 | 2.03E-07 | 520 | 415 |
| TRAF5     | 0.236568856 | 4.78E-08 | 2.05E-07 | 520 | 520 |
| PTPN12    | 0.236458041 | 4.85E-08 | 2.08E-07 | 520 | 520 |
| CD44      | 0.236385897 | 4.90E-08 | 2.10E-07 | 520 | 520 |
| LOC389333 | 0.236232676 | 5.00E-08 | 2.14E-07 | 520 | 520 |
| KCNIP1    | 0.23614864  | 5.06E-08 | 2.17E-07 | 520 | 379 |
| LRP6      | 0.236107666 | 5.08E-08 | 2.18E-07 | 520 | 520 |
| DUSP6     | 0.235907292 | 5.22E-08 | 2.23E-07 | 520 | 520 |
| RAB32     | 0.235765851 | 5.32E-08 | 2.27E-07 | 520 | 520 |
| ZNF702P   | 0.23573931  | 5.34E-08 | 2.28E-07 | 520 | 512 |

|              |             |          |          |     |     |
|--------------|-------------|----------|----------|-----|-----|
| CCNT1        | 0.235727507 | 5.35E-08 | 2.28E-07 | 520 | 519 |
| CACNA1E      | 0.235636443 | 5.41E-08 | 2.31E-07 | 520 | 490 |
| SNAPC2       | 0.235553532 | 5.47E-08 | 2.33E-07 | 520 | 520 |
| DNAJB5       | 0.235529727 | 5.49E-08 | 2.34E-07 | 520 | 520 |
| PRKAR2A      | 0.235507202 | 5.51E-08 | 2.34E-07 | 520 | 520 |
| KCNJ15       | 0.235465661 | 5.54E-08 | 2.36E-07 | 520 | 520 |
| FAM120B      | 0.235448705 | 5.55E-08 | 2.36E-07 | 520 | 520 |
| DCTN1        | 0.235416725 | 5.57E-08 | 2.37E-07 | 520 | 520 |
| LOC100128164 | 0.235367725 | 5.61E-08 | 2.38E-07 | 520 | 448 |
| C16orf58     | 0.23527914  | 5.68E-08 | 2.41E-07 | 520 | 520 |
| CCRN4L       | 0.235236697 | 5.71E-08 | 2.42E-07 | 520 | 520 |
| PFKFB3       | 0.235218493 | 5.72E-08 | 2.43E-07 | 520 | 520 |
| FADS1        | 0.235141896 | 5.78E-08 | 2.45E-07 | 520 | 520 |
| HECTD2       | 0.234993147 | 5.90E-08 | 2.50E-07 | 520 | 519 |
| ZDHHC20      | 0.234963467 | 5.92E-08 | 2.51E-07 | 520 | 520 |
| COG1         | 0.23495338  | 5.93E-08 | 2.51E-07 | 520 | 520 |
| ERC1         | 0.23490431  | 5.97E-08 | 2.53E-07 | 520 | 520 |
| C9orf129     | 0.23465694  | 6.17E-08 | 2.61E-07 | 520 | 518 |
| GPR45        | 0.234634886 | 6.18E-08 | 2.62E-07 | 520 | 274 |
| CECR1        | 0.234498841 | 6.30E-08 | 2.66E-07 | 520 | 520 |
| RAB9B        | 0.234468536 | 6.32E-08 | 2.67E-07 | 520 | 444 |
| ATXN2        | 0.234201127 | 6.55E-08 | 2.77E-07 | 520 | 520 |
| SNRPN        | 0.234189573 | 6.56E-08 | 2.77E-07 | 520 | 520 |
| FBXO40       | 0.234139271 | 6.60E-08 | 2.79E-07 | 520 | 352 |
| SAV1         | 0.234119111 | 6.62E-08 | 2.79E-07 | 520 | 520 |
| KLHDC10      | 0.234113987 | 6.63E-08 | 2.80E-07 | 520 | 520 |
| GFRA1        | 0.234092223 | 6.65E-08 | 2.80E-07 | 520 | 517 |
| ZNF34        | 0.23402963  | 6.70E-08 | 2.83E-07 | 520 | 520 |
| RNF182       | 0.234022317 | 6.71E-08 | 2.83E-07 | 520 | 517 |
| OSTC         | 0.233933713 | 6.79E-08 | 2.86E-07 | 520 | 520 |
| EP300        | 0.23390826  | 6.81E-08 | 2.87E-07 | 520 | 520 |
| TOR1AIP2     | 0.233792487 | 6.91E-08 | 2.91E-07 | 520 | 520 |
| CEP290       | 0.233704977 | 6.99E-08 | 2.94E-07 | 520 | 519 |
| TMEM110      | 0.233660073 | 7.04E-08 | 2.96E-07 | 520 | 520 |
| SLC22A15     | 0.233540923 | 7.15E-08 | 3.01E-07 | 520 | 520 |
| PRKDC        | 0.233539341 | 7.15E-08 | 3.01E-07 | 520 | 520 |
| ANXA13       | 0.233510356 | 7.18E-08 | 3.02E-07 | 520 | 465 |
| DNAH5        | 0.233462124 | 7.22E-08 | 3.03E-07 | 520 | 520 |
| CHRNA9       | 0.233440037 | 7.24E-08 | 3.04E-07 | 520 | 463 |
| IL4I1        | 0.233324037 | 7.36E-08 | 3.09E-07 | 520 | 520 |
| BEND5        | 0.233273159 | 7.40E-08 | 3.11E-07 | 520 | 513 |
| KCNK17       | 0.233270474 | 7.41E-08 | 3.11E-07 | 520 | 504 |
| KLHL7        | 0.233168772 | 7.51E-08 | 3.15E-07 | 520 | 520 |
| SEC24B       | 0.233143445 | 7.53E-08 | 3.16E-07 | 520 | 520 |
| HEATR6       | 0.233098683 | 7.58E-08 | 3.17E-07 | 520 | 520 |
| IMPG2        | 0.233030667 | 7.65E-08 | 3.20E-07 | 520 | 483 |

|          |             |          |          |     |     |
|----------|-------------|----------|----------|-----|-----|
| MACF1    | 0.232939663 | 7.74E-08 | 3.24E-07 | 520 | 520 |
| NCF2     | 0.232923055 | 7.75E-08 | 3.24E-07 | 520 | 520 |
| ATG2B    | 0.232896178 | 7.78E-08 | 3.25E-07 | 520 | 520 |
| ZFR      | 0.232813096 | 7.87E-08 | 3.29E-07 | 520 | 520 |
| KIFC3    | 0.232788026 | 7.89E-08 | 3.30E-07 | 520 | 520 |
| ABCA8    | 0.232748506 | 7.93E-08 | 3.31E-07 | 520 | 504 |
| CD97     | 0.232709945 | 7.97E-08 | 3.33E-07 | 520 | 520 |
| FAM171A1 | 0.232661954 | 8.03E-08 | 3.35E-07 | 520 | 520 |
| CSNK2A1P | 0.232565185 | 8.13E-08 | 3.39E-07 | 520 | 520 |
| LRRC3    | 0.232436468 | 8.27E-08 | 3.44E-07 | 520 | 520 |
| TRIM36   | 0.232373225 | 8.34E-08 | 3.47E-07 | 520 | 520 |
| C11orf70 | 0.232371283 | 8.34E-08 | 3.47E-07 | 520 | 518 |
| STMN3    | 0.232189961 | 8.54E-08 | 3.55E-07 | 520 | 520 |
| TPST2    | 0.232181122 | 8.55E-08 | 3.55E-07 | 520 | 520 |
| CBARA1   | 0.232137358 | 8.60E-08 | 3.57E-07 | 520 | 520 |
| MFAP3    | 0.232136041 | 8.60E-08 | 3.57E-07 | 520 | 520 |
| CMTM8    | 0.232135738 | 8.60E-08 | 3.57E-07 | 520 | 519 |
| SFRP5    | 0.232129193 | 8.61E-08 | 3.57E-07 | 520 | 384 |
| FGL2     | 0.23211852  | 8.62E-08 | 3.58E-07 | 520 | 520 |
| ART1     | 0.232110601 | 8.63E-08 | 3.58E-07 | 520 | 198 |
| IL16     | 0.232081691 | 8.66E-08 | 3.59E-07 | 520 | 520 |
| MED13L   | 0.232066662 | 8.68E-08 | 3.60E-07 | 520 | 520 |
| TRANK1   | 0.231961946 | 8.80E-08 | 3.65E-07 | 520 | 520 |
| SLITRK3  | 0.231862286 | 8.91E-08 | 3.69E-07 | 520 | 267 |
| CCND1    | 0.231824742 | 8.96E-08 | 3.71E-07 | 520 | 520 |
| ABCG2    | 0.231782873 | 9.01E-08 | 3.73E-07 | 520 | 519 |
| MEPE     | 0.231755111 | 9.04E-08 | 3.74E-07 | 520 | 286 |
| KDM5A    | 0.231701456 | 9.10E-08 | 3.77E-07 | 520 | 520 |
| ACTN3    | 0.231656166 | 9.16E-08 | 3.79E-07 | 520 | 488 |
| MEF2A    | 0.231551373 | 9.28E-08 | 3.84E-07 | 520 | 520 |
| ASXL1    | 0.231486916 | 9.36E-08 | 3.87E-07 | 520 | 520 |
| CAPN6    | 0.231210413 | 9.71E-08 | 4.00E-07 | 520 | 493 |
| MAP3K4   | 0.231204822 | 9.71E-08 | 4.01E-07 | 520 | 520 |
| DYNC112  | 0.231149574 | 9.78E-08 | 4.03E-07 | 520 | 520 |
| SLC23A2  | 0.231110405 | 9.83E-08 | 4.05E-07 | 520 | 520 |
| GGTA1    | 0.230970836 | 1.00E-07 | 4.12E-07 | 520 | 520 |
| DRD4     | 0.230962259 | 1.00E-07 | 4.13E-07 | 520 | 513 |
| KCNQ4    | 0.230907871 | 1.01E-07 | 4.16E-07 | 520 | 484 |
| TMEM35   | 0.230898227 | 1.01E-07 | 4.16E-07 | 520 | 486 |
| SLC26A2  | 0.230833678 | 1.02E-07 | 4.19E-07 | 520 | 520 |
| PJA2     | 0.230824509 | 1.02E-07 | 4.20E-07 | 520 | 520 |
| PARP8    | 0.230774846 | 1.03E-07 | 4.22E-07 | 520 | 520 |
| SYT14    | 0.230768391 | 1.03E-07 | 4.23E-07 | 520 | 440 |
| PTP4A3   | 0.230703535 | 1.04E-07 | 4.26E-07 | 520 | 520 |
| BMPR1A   | 0.230655759 | 1.04E-07 | 4.28E-07 | 520 | 520 |
| FAM70A   | 0.230605829 | 1.05E-07 | 4.31E-07 | 520 | 517 |

|           |             |          |          |     |     |
|-----------|-------------|----------|----------|-----|-----|
| FAM126A   | 0.230466722 | 1.07E-07 | 4.38E-07 | 520 | 520 |
| ZNF391    | 0.230447117 | 1.07E-07 | 4.39E-07 | 520 | 514 |
| TYRP1     | 0.230429999 | 1.07E-07 | 4.40E-07 | 520 | 466 |
| TNFSF14   | 0.230270847 | 1.10E-07 | 4.49E-07 | 520 | 498 |
| KCNE3     | 0.23022845  | 1.10E-07 | 4.51E-07 | 520 | 520 |
| CPEB1     | 0.230131416 | 1.12E-07 | 4.57E-07 | 520 | 484 |
| TFE3      | 0.230115118 | 1.12E-07 | 4.58E-07 | 520 | 520 |
| VPS37D    | 0.230107075 | 1.12E-07 | 4.58E-07 | 520 | 519 |
| N4BP2     | 0.23006152  | 1.13E-07 | 4.61E-07 | 520 | 520 |
| GOLT1B    | 0.229947497 | 1.14E-07 | 4.67E-07 | 520 | 520 |
| ADPRHL1   | 0.229895551 | 1.15E-07 | 4.70E-07 | 520 | 520 |
| QPRT      | 0.229890892 | 1.15E-07 | 4.70E-07 | 520 | 520 |
| KCNIP3    | 0.229876515 | 1.15E-07 | 4.71E-07 | 520 | 520 |
| ZC3HAV1L  | 0.229869959 | 1.16E-07 | 4.71E-07 | 520 | 520 |
| CD151     | 0.229840777 | 1.16E-07 | 4.73E-07 | 520 | 520 |
| BCHE      | 0.229792499 | 1.17E-07 | 4.75E-07 | 520 | 500 |
| CAMK1     | 0.229791523 | 1.17E-07 | 4.75E-07 | 520 | 520 |
| PTPRC     | 0.229709328 | 1.18E-07 | 4.80E-07 | 520 | 520 |
| FREM2     | 0.229687866 | 1.18E-07 | 4.82E-07 | 520 | 474 |
| LAT2      | 0.229630618 | 1.19E-07 | 4.85E-07 | 520 | 520 |
| EVC2      | 0.229593848 | 1.20E-07 | 4.87E-07 | 520 | 519 |
| FBXL2     | 0.229563591 | 1.20E-07 | 4.89E-07 | 520 | 520 |
| SLC45A2   | 0.229554815 | 1.20E-07 | 4.89E-07 | 520 | 327 |
| CANX      | 0.229450706 | 1.22E-07 | 4.96E-07 | 520 | 520 |
| SYDE2     | 0.229418943 | 1.23E-07 | 4.98E-07 | 520 | 517 |
| TPP2      | 0.229405553 | 1.23E-07 | 4.98E-07 | 520 | 520 |
| TNNT3     | 0.229301019 | 1.24E-07 | 5.05E-07 | 520 | 516 |
| EGR3      | 0.229231602 | 1.26E-07 | 5.09E-07 | 520 | 520 |
| CLSTN3    | 0.229185668 | 1.26E-07 | 5.12E-07 | 520 | 520 |
| CSF2      | 0.22911068  | 1.28E-07 | 5.17E-07 | 520 | 516 |
| NOX5      | 0.229110534 | 1.28E-07 | 5.17E-07 | 520 | 507 |
| CHST1     | 0.229041149 | 1.29E-07 | 5.21E-07 | 520 | 520 |
| C15orf51  | 0.229023852 | 1.29E-07 | 5.22E-07 | 520 | 423 |
| CHST12    | 0.229017261 | 1.29E-07 | 5.22E-07 | 520 | 520 |
| LOC144571 | 0.228913592 | 1.31E-07 | 5.29E-07 | 520 | 520 |
| ZNF792    | 0.228912366 | 1.31E-07 | 5.29E-07 | 520 | 519 |
| FBXO10    | 0.228879901 | 1.31E-07 | 5.31E-07 | 520 | 520 |
| ANG       | 0.228801686 | 1.33E-07 | 5.36E-07 | 520 | 520 |
| KIAA1109  | 0.228709693 | 1.34E-07 | 5.43E-07 | 520 | 520 |
| SOCS2     | 0.228673617 | 1.35E-07 | 5.45E-07 | 520 | 520 |
| ZDHHHC15  | 0.228654851 | 1.35E-07 | 5.46E-07 | 520 | 497 |
| RP2       | 0.228565169 | 1.37E-07 | 5.52E-07 | 520 | 520 |
| SGPL1     | 0.228555986 | 1.37E-07 | 5.53E-07 | 520 | 520 |
| TMEM39A   | 0.228531483 | 1.37E-07 | 5.54E-07 | 520 | 520 |
| ZNF484    | 0.228483882 | 1.38E-07 | 5.58E-07 | 520 | 520 |
| ZNF286A   | 0.228430101 | 1.39E-07 | 5.61E-07 | 520 | 520 |

|          |             |          |          |     |     |
|----------|-------------|----------|----------|-----|-----|
| KRT81    | 0.228424863 | 1.39E-07 | 5.62E-07 | 520 | 520 |
| SIX4     | 0.228392526 | 1.40E-07 | 5.64E-07 | 520 | 520 |
| KIAA1211 | 0.228282273 | 1.42E-07 | 5.72E-07 | 520 | 519 |
| TTPAL    | 0.228273122 | 1.42E-07 | 5.72E-07 | 520 | 520 |
| FTL      | 0.228184012 | 1.44E-07 | 5.79E-07 | 520 | 520 |
| TCF7     | 0.228016844 | 1.47E-07 | 5.91E-07 | 520 | 520 |
| NUDT4    | 0.22792997  | 1.48E-07 | 5.97E-07 | 520 | 520 |
| MAGEE1   | 0.227903311 | 1.49E-07 | 5.99E-07 | 520 | 519 |
| HIGD1B   | 0.227858526 | 1.50E-07 | 6.02E-07 | 520 | 520 |
| CAPRIN1  | 0.227847904 | 1.50E-07 | 6.03E-07 | 520 | 520 |
| KL       | 0.227822834 | 1.51E-07 | 6.05E-07 | 520 | 515 |
| FAM161B  | 0.227801428 | 1.51E-07 | 6.06E-07 | 520 | 518 |
| SIM1     | 0.227719533 | 1.53E-07 | 6.12E-07 | 520 | 259 |
| SNTB2    | 0.227620447 | 1.55E-07 | 6.20E-07 | 520 | 520 |
| SNAP23   | 0.227581307 | 1.55E-07 | 6.23E-07 | 520 | 520 |
| BSN      | 0.227322009 | 1.61E-07 | 6.43E-07 | 520 | 515 |
| INPP4A   | 0.227291354 | 1.61E-07 | 6.45E-07 | 520 | 520 |
| WDFY4    | 0.227287501 | 1.61E-07 | 6.46E-07 | 520 | 520 |
| TMEM92   | 0.227270881 | 1.62E-07 | 6.47E-07 | 520 | 520 |
| KRTAP2-1 | 0.227259304 | 1.62E-07 | 6.48E-07 | 520 | 148 |
| NBPF1    | 0.227249961 | 1.62E-07 | 6.48E-07 | 520 | 520 |
| ZNF503   | 0.227221503 | 1.63E-07 | 6.50E-07 | 520 | 520 |
| CD59     | 0.227198979 | 1.63E-07 | 6.52E-07 | 520 | 520 |
| STEAP3   | 0.227021624 | 1.67E-07 | 6.67E-07 | 520 | 520 |
| RPL13P5  | 0.227019893 | 1.67E-07 | 6.67E-07 | 520 | 519 |
| ATP11C   | 0.227002352 | 1.67E-07 | 6.68E-07 | 520 | 520 |
| VCPIP1   | 0.226973419 | 1.68E-07 | 6.71E-07 | 520 | 520 |
| CKAP5    | 0.226962929 | 1.68E-07 | 6.71E-07 | 520 | 520 |
| FSD1     | 0.226953397 | 1.68E-07 | 6.72E-07 | 520 | 520 |
| ERCC2    | 0.226935693 | 1.69E-07 | 6.74E-07 | 520 | 520 |
| ZCCHC18  | 0.22685848  | 1.70E-07 | 6.80E-07 | 520 | 504 |
| EIF2C2   | 0.226760108 | 1.73E-07 | 6.88E-07 | 520 | 520 |
| EID2B    | 0.2265601   | 1.77E-07 | 7.05E-07 | 520 | 520 |
| AP2A1    | 0.226549441 | 1.77E-07 | 7.06E-07 | 520 | 520 |
| MGAT4C   | 0.226528338 | 1.78E-07 | 7.08E-07 | 520 | 339 |
| SUPT3H   | 0.226517168 | 1.78E-07 | 7.09E-07 | 520 | 520 |
| APAF1    | 0.226496821 | 1.78E-07 | 7.10E-07 | 520 | 520 |
| IPO7     | 0.226445938 | 1.80E-07 | 7.14E-07 | 520 | 520 |
| HRCT1    | 0.226376214 | 1.81E-07 | 7.20E-07 | 520 | 512 |
| SGMS2    | 0.226373774 | 1.81E-07 | 7.20E-07 | 520 | 520 |
| CORO1C   | 0.226336012 | 1.82E-07 | 7.24E-07 | 520 | 520 |
| ALKBH5   | 0.226334029 | 1.82E-07 | 7.24E-07 | 520 | 520 |
| WDFY1    | 0.226247767 | 1.84E-07 | 7.31E-07 | 520 | 520 |
| CD81     | 0.226247588 | 1.84E-07 | 7.31E-07 | 520 | 520 |
| LDLRAD2  | 0.22624751  | 1.84E-07 | 7.31E-07 | 520 | 520 |
| ADAM22   | 0.226146414 | 1.87E-07 | 7.40E-07 | 520 | 492 |

|              |             |          |          |     |     |
|--------------|-------------|----------|----------|-----|-----|
| C1orf85      | 0.22600078  | 1.90E-07 | 7.53E-07 | 520 | 520 |
| ABCC10       | 0.225931175 | 1.92E-07 | 7.59E-07 | 520 | 520 |
| PIK3C2A      | 0.225776018 | 1.96E-07 | 7.73E-07 | 520 | 520 |
| ZNF354C      | 0.225737413 | 1.97E-07 | 7.77E-07 | 520 | 505 |
| POLR3A       | 0.225733623 | 1.97E-07 | 7.77E-07 | 520 | 520 |
| PRR11        | 0.22564151  | 1.99E-07 | 7.86E-07 | 520 | 518 |
| MMS19        | 0.225526472 | 2.02E-07 | 7.97E-07 | 520 | 520 |
| CHST10       | 0.225475638 | 2.03E-07 | 8.02E-07 | 520 | 520 |
| CYTH4        | 0.225438536 | 2.04E-07 | 8.05E-07 | 520 | 520 |
| TAB2         | 0.22536217  | 2.06E-07 | 8.13E-07 | 520 | 520 |
| CADM2        | 0.225337444 | 2.07E-07 | 8.15E-07 | 520 | 363 |
| YWHAH        | 0.225296574 | 2.08E-07 | 8.19E-07 | 520 | 520 |
| SPCS3        | 0.225093855 | 2.13E-07 | 8.40E-07 | 520 | 520 |
| BIRC2        | 0.225088016 | 2.14E-07 | 8.40E-07 | 520 | 520 |
| GOLGA3       | 0.225029707 | 2.15E-07 | 8.46E-07 | 520 | 520 |
| LOC100302401 | 0.225022058 | 2.15E-07 | 8.47E-07 | 520 | 520 |
| HOOK3        | 0.224916968 | 2.18E-07 | 8.58E-07 | 520 | 520 |
| TICAM2       | 0.224874209 | 2.19E-07 | 8.62E-07 | 520 | 514 |
| NPR1         | 0.224862202 | 2.20E-07 | 8.63E-07 | 520 | 520 |
| SLC7A6OS     | 0.22481442  | 2.21E-07 | 8.67E-07 | 520 | 520 |
| NUDT11       | 0.224786093 | 2.22E-07 | 8.70E-07 | 520 | 520 |
| ZNF501       | 0.22471954  | 2.24E-07 | 8.77E-07 | 520 | 520 |
| GDF3         | 0.2246696   | 2.25E-07 | 8.83E-07 | 520 | 425 |
| PRTFDC1      | 0.224662389 | 2.25E-07 | 8.83E-07 | 520 | 520 |
| TMEM182      | 0.224597646 | 2.27E-07 | 8.90E-07 | 520 | 520 |
| DDO          | 0.224424548 | 2.32E-07 | 9.10E-07 | 520 | 509 |
| KCNA10       | 0.224344855 | 2.35E-07 | 9.18E-07 | 520 | 145 |
| PCDHGA1      | 0.224334467 | 2.35E-07 | 9.19E-07 | 520 | 513 |
| CERKL        | 0.224288501 | 2.36E-07 | 9.24E-07 | 520 | 519 |
| ADCY1        | 0.224244492 | 2.38E-07 | 9.29E-07 | 520 | 520 |
| DNASE2B      | 0.224213688 | 2.39E-07 | 9.33E-07 | 520 | 308 |
| ZNF737       | 0.224177785 | 2.40E-07 | 9.36E-07 | 520 | 518 |
| SIAH1        | 0.224123101 | 2.41E-07 | 9.42E-07 | 520 | 520 |
| PTPN1        | 0.224085252 | 2.42E-07 | 9.46E-07 | 520 | 520 |
| CCDC40       | 0.224059657 | 2.43E-07 | 9.49E-07 | 520 | 518 |
| SPIN1        | 0.224031318 | 2.44E-07 | 9.52E-07 | 520 | 520 |
| PLP1         | 0.223953781 | 2.47E-07 | 9.60E-07 | 520 | 465 |
| IL10RA       | 0.22390572  | 2.48E-07 | 9.65E-07 | 520 | 520 |
| ACPT         | 0.223739269 | 2.53E-07 | 9.85E-07 | 520 | 256 |
| TRIM23       | 0.223720894 | 2.54E-07 | 9.87E-07 | 520 | 520 |
| ZNF239       | 0.223720574 | 2.54E-07 | 9.87E-07 | 520 | 518 |
| TCN2         | 0.223636626 | 2.57E-07 | 9.97E-07 | 520 | 520 |
| PTPLB        | 0.223625481 | 2.57E-07 | 9.98E-07 | 520 | 518 |
| DAGLA        | 0.223549311 | 2.59E-07 | 1.01E-06 | 520 | 519 |
| SEC62        | 0.223522861 | 2.60E-07 | 1.01E-06 | 520 | 520 |
| DNAJB14      | 0.223315827 | 2.67E-07 | 1.04E-06 | 520 | 520 |

|           |             |          |          |     |     |
|-----------|-------------|----------|----------|-----|-----|
| RABAC1    | 0.223192229 | 2.71E-07 | 1.05E-06 | 520 | 520 |
| ZNF418    | 0.223122052 | 2.74E-07 | 1.06E-06 | 520 | 512 |
| GABRB2    | 0.222952491 | 2.80E-07 | 1.08E-06 | 520 | 418 |
| GRIK2     | 0.222949796 | 2.80E-07 | 1.08E-06 | 520 | 428 |
| ATN1      | 0.222899397 | 2.82E-07 | 1.09E-06 | 520 | 520 |
| TTL       | 0.222825117 | 2.84E-07 | 1.10E-06 | 520 | 520 |
| SGK196    | 0.222814012 | 2.85E-07 | 1.10E-06 | 520 | 520 |
| NPHP1     | 0.222750635 | 2.87E-07 | 1.11E-06 | 520 | 520 |
| LOC647121 | 0.22261453  | 2.92E-07 | 1.13E-06 | 520 | 520 |
| CHST6     | 0.222558164 | 2.94E-07 | 1.13E-06 | 520 | 520 |
| AKT1      | 0.222557515 | 2.94E-07 | 1.13E-06 | 520 | 520 |
| LRP3      | 0.222555319 | 2.94E-07 | 1.13E-06 | 520 | 520 |
| ITM2A     | 0.222323789 | 3.03E-07 | 1.17E-06 | 520 | 520 |
| WDR1      | 0.222282592 | 3.04E-07 | 1.17E-06 | 520 | 520 |
| PRKAR2B   | 0.222268025 | 3.05E-07 | 1.17E-06 | 520 | 520 |
| SV2B      | 0.222256566 | 3.05E-07 | 1.18E-06 | 520 | 511 |
| C17orf87  | 0.222193752 | 3.08E-07 | 1.18E-06 | 520 | 508 |
| CHD4      | 0.222181257 | 3.08E-07 | 1.19E-06 | 520 | 520 |
| NFATC1    | 0.222134825 | 3.10E-07 | 1.19E-06 | 520 | 520 |
| SLC35F2   | 0.222095172 | 3.11E-07 | 1.20E-06 | 520 | 520 |
| CAPSL     | 0.222039037 | 3.14E-07 | 1.21E-06 | 520 | 316 |
| KLK4      | 0.221964855 | 3.17E-07 | 1.22E-06 | 520 | 468 |
| GAS2L3    | 0.221960294 | 3.17E-07 | 1.22E-06 | 520 | 510 |
| CDC42EP5  | 0.221939624 | 3.18E-07 | 1.22E-06 | 520 | 520 |
| C7orf60   | 0.221910706 | 3.19E-07 | 1.22E-06 | 520 | 520 |
| AOAH      | 0.221876797 | 3.20E-07 | 1.23E-06 | 520 | 520 |
| PPT1      | 0.221855746 | 3.21E-07 | 1.23E-06 | 520 | 520 |
| ZNF665    | 0.221802309 | 3.23E-07 | 1.24E-06 | 520 | 491 |
| BIRC6     | 0.221791247 | 3.23E-07 | 1.24E-06 | 520 | 520 |
| ITGA2     | 0.22175503  | 3.25E-07 | 1.25E-06 | 520 | 520 |
| GADL1     | 0.221586662 | 3.32E-07 | 1.27E-06 | 520 | 243 |
| TNNI2     | 0.221585393 | 3.32E-07 | 1.27E-06 | 520 | 520 |
| PCDHB8    | 0.221534839 | 3.34E-07 | 1.28E-06 | 520 | 518 |
| AKAP10    | 0.221482413 | 3.36E-07 | 1.29E-06 | 520 | 520 |
| KIAA1826  | 0.221452648 | 3.37E-07 | 1.29E-06 | 520 | 520 |
| ERGIC1    | 0.221450837 | 3.38E-07 | 1.29E-06 | 520 | 520 |
| ZFPM1     | 0.221439401 | 3.38E-07 | 1.29E-06 | 520 | 520 |
| TMEM104   | 0.221359287 | 3.41E-07 | 1.31E-06 | 520 | 520 |
| ZNF641    | 0.221328993 | 3.43E-07 | 1.31E-06 | 520 | 520 |
| APCDD1    | 0.221294977 | 3.44E-07 | 1.32E-06 | 520 | 520 |
| UEVLD     | 0.221235183 | 3.47E-07 | 1.33E-06 | 520 | 520 |
| PCDHA10   | 0.221207552 | 3.48E-07 | 1.33E-06 | 520 | 292 |
| CANT1     | 0.221158191 | 3.50E-07 | 1.34E-06 | 520 | 520 |
| BCAR1     | 0.221127903 | 3.51E-07 | 1.34E-06 | 520 | 520 |
| C2orf81   | 0.221119167 | 3.52E-07 | 1.34E-06 | 520 | 520 |
| FLJ42875  | 0.221107516 | 3.52E-07 | 1.35E-06 | 520 | 467 |

|              |             |          |          |     |     |
|--------------|-------------|----------|----------|-----|-----|
| CUEDC1       | 0.221079642 | 3.54E-07 | 1.35E-06 | 520 | 520 |
| SLC36A4      | 0.221028144 | 3.56E-07 | 1.36E-06 | 520 | 520 |
| CD164        | 0.220989646 | 3.58E-07 | 1.36E-06 | 520 | 520 |
| PRDM11       | 0.220924391 | 3.60E-07 | 1.37E-06 | 520 | 519 |
| LOC100132707 | 0.220862002 | 3.63E-07 | 1.38E-06 | 520 | 520 |
| EHBP1        | 0.220859737 | 3.63E-07 | 1.38E-06 | 520 | 520 |
| DPY19L4      | 0.220778284 | 3.67E-07 | 1.40E-06 | 520 | 520 |
| PDIA6        | 0.220665948 | 3.72E-07 | 1.42E-06 | 520 | 520 |
| CDH20        | 0.220653886 | 3.73E-07 | 1.42E-06 | 520 | 467 |
| GALM         | 0.220651534 | 3.73E-07 | 1.42E-06 | 520 | 520 |
| PRX          | 0.220632405 | 3.74E-07 | 1.42E-06 | 520 | 520 |
| NBR1         | 0.220604873 | 3.75E-07 | 1.43E-06 | 520 | 520 |
| NLGN4X       | 0.2204927   | 3.80E-07 | 1.45E-06 | 520 | 517 |
| NME4         | 0.220445266 | 3.83E-07 | 1.45E-06 | 520 | 520 |
| LBP          | 0.220407218 | 3.84E-07 | 1.46E-06 | 520 | 476 |
| SLC30A6      | 0.220358144 | 3.87E-07 | 1.47E-06 | 520 | 520 |
| C10orf108    | 0.220340315 | 3.88E-07 | 1.47E-06 | 520 | 337 |
| SLC46A1      | 0.220336558 | 3.88E-07 | 1.47E-06 | 520 | 520 |
| TMED4        | 0.220330684 | 3.88E-07 | 1.47E-06 | 520 | 520 |
| ZNF417       | 0.220292079 | 3.90E-07 | 1.48E-06 | 520 | 520 |
| JOSD1        | 0.220181714 | 3.95E-07 | 1.50E-06 | 520 | 520 |
| SLC35C1      | 0.220090376 | 4.00E-07 | 1.51E-06 | 520 | 520 |
| GSTT2        | 0.219989497 | 4.05E-07 | 1.53E-06 | 520 | 520 |
| PIKFYVE      | 0.219926066 | 4.08E-07 | 1.54E-06 | 520 | 520 |
| LOC644936    | 0.219733225 | 4.18E-07 | 1.58E-06 | 520 | 520 |
| OSBPL10      | 0.219721354 | 4.19E-07 | 1.58E-06 | 520 | 520 |
| TEX261       | 0.219693671 | 4.20E-07 | 1.59E-06 | 520 | 520 |
| HELB         | 0.21968519  | 4.20E-07 | 1.59E-06 | 520 | 520 |
| INTS4L1      | 0.219619255 | 4.24E-07 | 1.60E-06 | 520 | 515 |
| SMURF1       | 0.219614237 | 4.24E-07 | 1.60E-06 | 520 | 520 |
| ACOX2        | 0.219528806 | 4.29E-07 | 1.62E-06 | 520 | 518 |
| CD83         | 0.219477275 | 4.31E-07 | 1.63E-06 | 520 | 520 |
| C5orf42      | 0.219389134 | 4.36E-07 | 1.64E-06 | 520 | 520 |
| LEPR         | 0.219355862 | 4.38E-07 | 1.65E-06 | 520 | 520 |
| ALMS1        | 0.219153124 | 4.49E-07 | 1.69E-06 | 520 | 520 |
| CARNS1       | 0.219121502 | 4.51E-07 | 1.70E-06 | 520 | 520 |
| KDM6B        | 0.219102092 | 4.52E-07 | 1.70E-06 | 520 | 520 |
| KCNE1L       | 0.218951639 | 4.60E-07 | 1.73E-06 | 520 | 510 |
| LOC100130776 | 0.218930601 | 4.62E-07 | 1.73E-06 | 520 | 520 |
| GZF1         | 0.218912814 | 4.63E-07 | 1.74E-06 | 520 | 520 |
| LAMP2        | 0.218833192 | 4.67E-07 | 1.75E-06 | 520 | 520 |
| ADAM9        | 0.218686554 | 4.76E-07 | 1.78E-06 | 520 | 520 |
| TMEM87B      | 0.218640692 | 4.78E-07 | 1.79E-06 | 520 | 520 |
| MET          | 0.218622614 | 4.79E-07 | 1.80E-06 | 520 | 520 |
| POMGNT1      | 0.218490393 | 4.87E-07 | 1.82E-06 | 520 | 520 |
| SLC38A6      | 0.218339132 | 4.96E-07 | 1.86E-06 | 520 | 520 |



|          |             |          |          |     |     |
|----------|-------------|----------|----------|-----|-----|
| CAD      | 0.218313419 | 4.98E-07 | 1.86E-06 | 520 | 520 |
| AGPAT4   | 0.218296147 | 4.99E-07 | 1.87E-06 | 520 | 520 |
| TUBB2B   | 0.218272721 | 5.00E-07 | 1.87E-06 | 520 | 519 |
| PJA1     | 0.218259926 | 5.01E-07 | 1.87E-06 | 520 | 520 |
| ECE1     | 0.218255907 | 5.02E-07 | 1.87E-06 | 520 | 520 |
| SCUBE1   | 0.218151379 | 5.08E-07 | 1.90E-06 | 520 | 511 |
| LAMP1    | 0.21810513  | 5.11E-07 | 1.91E-06 | 520 | 520 |
| ICAM2    | 0.218097162 | 5.11E-07 | 1.91E-06 | 520 | 520 |
| INTS4L2  | 0.21806887  | 5.13E-07 | 1.91E-06 | 520 | 511 |
| NTRK3    | 0.218055182 | 5.14E-07 | 1.92E-06 | 520 | 468 |
| NBEAL1   | 0.217865395 | 5.26E-07 | 1.96E-06 | 520 | 520 |
| SPATA6   | 0.217746403 | 5.34E-07 | 1.99E-06 | 520 | 513 |
| RIC8A    | 0.217683926 | 5.38E-07 | 2.00E-06 | 520 | 520 |
| C8orf83  | 0.217604702 | 5.43E-07 | 2.02E-06 | 520 | 520 |
| ZNF585B  | 0.217403575 | 5.57E-07 | 2.07E-06 | 520 | 519 |
| GRIP1    | 0.217343965 | 5.61E-07 | 2.08E-06 | 520 | 520 |
| LILRA5   | 0.217342734 | 5.61E-07 | 2.08E-06 | 520 | 519 |
| NPPB     | 0.217277115 | 5.65E-07 | 2.10E-06 | 520 | 84  |
| TCF7L1   | 0.217232153 | 5.69E-07 | 2.11E-06 | 520 | 520 |
| CAMTA2   | 0.217120506 | 5.76E-07 | 2.14E-06 | 520 | 520 |
| FAM163A  | 0.217080652 | 5.79E-07 | 2.15E-06 | 520 | 420 |
| STK38L   | 0.217043523 | 5.82E-07 | 2.16E-06 | 520 | 520 |
| PPP1R1A  | 0.217034718 | 5.83E-07 | 2.16E-06 | 520 | 438 |
| WNT11    | 0.217032062 | 5.83E-07 | 2.16E-06 | 520 | 520 |
| TTC21B   | 0.216976783 | 5.87E-07 | 2.17E-06 | 520 | 520 |
| MMRN1    | 0.216842334 | 5.96E-07 | 2.20E-06 | 520 | 513 |
| ENAM     | 0.216768224 | 6.02E-07 | 2.22E-06 | 520 | 279 |
| ZFP57    | 0.216719913 | 6.05E-07 | 2.23E-06 | 520 | 475 |
| ZNF843   | 0.216689049 | 6.08E-07 | 2.24E-06 | 520 | 516 |
| HERC1    | 0.216639755 | 6.11E-07 | 2.25E-06 | 520 | 520 |
| SUGT1P1  | 0.216556933 | 6.18E-07 | 2.28E-06 | 520 | 492 |
| CAP1     | 0.216444967 | 6.26E-07 | 2.31E-06 | 520 | 520 |
| ABLIM3   | 0.216404022 | 6.29E-07 | 2.32E-06 | 520 | 520 |
| IL17B    | 0.216253761 | 6.41E-07 | 2.36E-06 | 520 | 450 |
| RAP1A    | 0.216112057 | 6.52E-07 | 2.40E-06 | 520 | 520 |
| DCAF12L2 | 0.216090921 | 6.54E-07 | 2.40E-06 | 520 | 320 |
| PPP1R14A | 0.216021652 | 6.59E-07 | 2.42E-06 | 520 | 520 |
| STK4     | 0.215992248 | 6.61E-07 | 2.43E-06 | 520 | 520 |
| ST3GAL6  | 0.215950977 | 6.65E-07 | 2.44E-06 | 520 | 520 |
| SYT13    | 0.215882525 | 6.70E-07 | 2.46E-06 | 520 | 456 |
| CCDC136  | 0.215789115 | 6.78E-07 | 2.49E-06 | 520 | 520 |
| PVALB    | 0.215751699 | 6.81E-07 | 2.50E-06 | 520 | 447 |
| HLA-DQA1 | 0.215716023 | 6.84E-07 | 2.51E-06 | 520 | 520 |
| APOC2    | 0.215689514 | 6.86E-07 | 2.52E-06 | 520 | 520 |
| CRELD1   | 0.215689398 | 6.86E-07 | 2.52E-06 | 520 | 520 |
| KIAA1279 | 0.215685532 | 6.87E-07 | 2.52E-06 | 520 | 520 |

|          |             |          |          |     |     |
|----------|-------------|----------|----------|-----|-----|
| SYNJ2    | 0.215624391 | 6.92E-07 | 2.54E-06 | 520 | 520 |
| RPS6KC1  | 0.215522133 | 7.00E-07 | 2.57E-06 | 520 | 520 |
| PPP4R2   | 0.215436387 | 7.08E-07 | 2.59E-06 | 520 | 520 |
| GPR56    | 0.215389921 | 7.12E-07 | 2.61E-06 | 520 | 520 |
| BIRC7    | 0.215376491 | 7.13E-07 | 2.61E-06 | 520 | 446 |
| CIC      | 0.2152685   | 7.22E-07 | 2.64E-06 | 520 | 520 |
| ITGB6    | 0.21520778  | 7.28E-07 | 2.66E-06 | 520 | 520 |
| C9orf25  | 0.215192783 | 7.29E-07 | 2.67E-06 | 520 | 520 |
| TET1     | 0.215180186 | 7.30E-07 | 2.67E-06 | 520 | 520 |
| FAM7A2   | 0.215113644 | 7.36E-07 | 2.69E-06 | 520 | 370 |
| FAM167A  | 0.21507211  | 7.40E-07 | 2.70E-06 | 520 | 520 |
| SYNC     | 0.215071299 | 7.40E-07 | 2.70E-06 | 520 | 520 |
| C21orf82 | 0.215042429 | 7.42E-07 | 2.71E-06 | 520 | 514 |
| CKAP4    | 0.21503464  | 7.43E-07 | 2.71E-06 | 520 | 520 |
| SPATA20  | 0.214883697 | 7.57E-07 | 2.76E-06 | 520 | 520 |
| SLC38A3  | 0.214848983 | 7.60E-07 | 2.77E-06 | 520 | 486 |
| KIAA0408 | 0.214733226 | 7.71E-07 | 2.81E-06 | 520 | 183 |
| PLEKHM3  | 0.214703733 | 7.73E-07 | 2.82E-06 | 520 | 520 |
| SLC9A7   | 0.214699234 | 7.74E-07 | 2.82E-06 | 520 | 520 |
| ZMYM3    | 0.214651104 | 7.78E-07 | 2.83E-06 | 520 | 520 |
| F2RL1    | 0.214594327 | 7.84E-07 | 2.85E-06 | 520 | 520 |
| FBXO30   | 0.214547817 | 7.88E-07 | 2.87E-06 | 520 | 520 |
| LAMB3    | 0.214423361 | 8.00E-07 | 2.91E-06 | 520 | 520 |
| ALX4     | 0.214414944 | 8.01E-07 | 2.91E-06 | 520 | 349 |
| C4orf49  | 0.214414709 | 8.01E-07 | 2.91E-06 | 520 | 502 |
| KIF5A    | 0.214371018 | 8.05E-07 | 2.93E-06 | 520 | 465 |
| SMARCA5  | 0.214264914 | 8.15E-07 | 2.96E-06 | 520 | 520 |
| P2RY14   | 0.214239778 | 8.18E-07 | 2.97E-06 | 520 | 515 |
| AIDA     | 0.214224459 | 8.19E-07 | 2.98E-06 | 520 | 520 |
| ZC3H12D  | 0.214201974 | 8.22E-07 | 2.98E-06 | 520 | 516 |
| CECR6    | 0.214073844 | 8.35E-07 | 3.03E-06 | 520 | 520 |
| C1QL4    | 0.214064909 | 8.35E-07 | 3.03E-06 | 520 | 477 |
| RTTN     | 0.214012523 | 8.41E-07 | 3.05E-06 | 520 | 520 |
| MARCKSL1 | 0.214011486 | 8.41E-07 | 3.05E-06 | 520 | 520 |
| NHLRC3   | 0.213943255 | 8.48E-07 | 3.07E-06 | 520 | 520 |
| KBTBD4   | 0.213917328 | 8.50E-07 | 3.08E-06 | 520 | 520 |
| LRRC10B  | 0.213890883 | 8.53E-07 | 3.09E-06 | 520 | 514 |
| GOSR2    | 0.213749092 | 8.68E-07 | 3.14E-06 | 520 | 520 |
| DSTYK    | 0.213692167 | 8.74E-07 | 3.16E-06 | 520 | 520 |
| TAL1     | 0.213613142 | 8.82E-07 | 3.19E-06 | 520 | 520 |
| C4orf42  | 0.2136057   | 8.83E-07 | 3.19E-06 | 520 | 520 |
| YLPM1    | 0.213516112 | 8.92E-07 | 3.22E-06 | 520 | 520 |
| SLA      | 0.213450851 | 8.99E-07 | 3.25E-06 | 520 | 520 |
| G3BP2    | 0.213405185 | 9.04E-07 | 3.27E-06 | 520 | 520 |
| TBX18    | 0.2132253   | 9.24E-07 | 3.33E-06 | 520 | 518 |
| M6PR     | 0.213202882 | 9.27E-07 | 3.34E-06 | 520 | 520 |

|           |             |          |          |     |     |
|-----------|-------------|----------|----------|-----|-----|
| KBTBD7    | 0.213139612 | 9.34E-07 | 3.37E-06 | 520 | 520 |
| PPM1H     | 0.212985486 | 9.51E-07 | 3.43E-06 | 520 | 520 |
| PIWIL4    | 0.212941711 | 9.56E-07 | 3.44E-06 | 520 | 519 |
| EPHB1     | 0.212886067 | 9.63E-07 | 3.47E-06 | 520 | 520 |
| AMPD1     | 0.212845047 | 9.67E-07 | 3.48E-06 | 520 | 459 |
| ZBTB2     | 0.212671305 | 9.88E-07 | 3.55E-06 | 520 | 520 |
| ACOT2     | 0.21254019  | 1.00E-06 | 3.61E-06 | 520 | 520 |
| AFAP1L1   | 0.212466479 | 1.01E-06 | 3.64E-06 | 520 | 520 |
| ENTHD1    | 0.212455623 | 1.01E-06 | 3.64E-06 | 520 | 434 |
| YAP1      | 0.21234254  | 1.03E-06 | 3.69E-06 | 520 | 520 |
| CH25H     | 0.212341312 | 1.03E-06 | 3.69E-06 | 520 | 520 |
| INSIG2    | 0.21223624  | 1.04E-06 | 3.73E-06 | 520 | 520 |
| STRA6     | 0.212185596 | 1.05E-06 | 3.75E-06 | 520 | 520 |
| CORO6     | 0.212146697 | 1.05E-06 | 3.77E-06 | 520 | 520 |
| TMED5     | 0.212109191 | 1.06E-06 | 3.79E-06 | 520 | 520 |
| BTN2A3    | 0.212080709 | 1.06E-06 | 3.80E-06 | 520 | 519 |
| REV3L     | 0.212056125 | 1.06E-06 | 3.81E-06 | 520 | 520 |
| ITGB1BP2  | 0.212005359 | 1.07E-06 | 3.83E-06 | 520 | 518 |
| KLHL11    | 0.211973845 | 1.07E-06 | 3.84E-06 | 520 | 517 |
| ODZ1      | 0.211926397 | 1.08E-06 | 3.86E-06 | 520 | 494 |
| MYO1D     | 0.211910874 | 1.08E-06 | 3.87E-06 | 520 | 520 |
| SRL       | 0.211883668 | 1.09E-06 | 3.88E-06 | 520 | 518 |
| H2BFXP    | 0.211843516 | 1.09E-06 | 3.90E-06 | 520 | 450 |
| TMEM132D  | 0.211794923 | 1.10E-06 | 3.92E-06 | 520 | 181 |
| PPM1M     | 0.211790689 | 1.10E-06 | 3.92E-06 | 520 | 520 |
| KIF13A    | 0.211777932 | 1.10E-06 | 3.93E-06 | 520 | 520 |
| PHACTR2   | 0.211719217 | 1.11E-06 | 3.95E-06 | 520 | 520 |
| AHNAK     | 0.21169658  | 1.11E-06 | 3.96E-06 | 520 | 520 |
| STBD1     | 0.211660263 | 1.11E-06 | 3.98E-06 | 520 | 520 |
| SLC24A4   | 0.211644488 | 1.12E-06 | 3.99E-06 | 520 | 504 |
| ANK1      | 0.211618078 | 1.12E-06 | 4.00E-06 | 520 | 520 |
| CCL23     | 0.211449026 | 1.14E-06 | 4.07E-06 | 520 | 469 |
| FEZ1      | 0.211368662 | 1.15E-06 | 4.11E-06 | 520 | 520 |
| SORCS1    | 0.211331495 | 1.16E-06 | 4.13E-06 | 520 | 435 |
| MCC       | 0.2113078   | 1.16E-06 | 4.14E-06 | 520 | 520 |
| KCTD20    | 0.211269799 | 1.17E-06 | 4.15E-06 | 520 | 520 |
| PLSCR3    | 0.211221384 | 1.17E-06 | 4.18E-06 | 520 | 520 |
| KCNAB1    | 0.211023231 | 1.20E-06 | 4.27E-06 | 520 | 519 |
| C4orf38   | 0.2109868   | 1.21E-06 | 4.29E-06 | 520 | 515 |
| KIAA1324L | 0.210932395 | 1.22E-06 | 4.32E-06 | 520 | 520 |
| MB        | 0.210907273 | 1.22E-06 | 4.33E-06 | 520 | 515 |
| MSX2P1    | 0.210813525 | 1.23E-06 | 4.38E-06 | 520 | 409 |
| USP22     | 0.210748311 | 1.24E-06 | 4.41E-06 | 520 | 520 |
| ZNF234    | 0.210725767 | 1.25E-06 | 4.42E-06 | 520 | 520 |
| ANKRD10   | 0.210539579 | 1.27E-06 | 4.52E-06 | 520 | 520 |
| RNF121    | 0.210369888 | 1.30E-06 | 4.61E-06 | 520 | 520 |

|            |             |          |          |     |     |
|------------|-------------|----------|----------|-----|-----|
| TAC4       | 0.210349026 | 1.30E-06 | 4.62E-06 | 520 | 294 |
| CLEC1B     | 0.210229776 | 1.32E-06 | 4.68E-06 | 520 | 151 |
| SLC38A5    | 0.210151879 | 1.33E-06 | 4.72E-06 | 520 | 520 |
| CCDC147    | 0.210084958 | 1.34E-06 | 4.76E-06 | 520 | 516 |
| ZNF43      | 0.210064667 | 1.35E-06 | 4.77E-06 | 520 | 519 |
| SLC35F5    | 0.210027546 | 1.35E-06 | 4.79E-06 | 520 | 520 |
| NFAT5      | 0.209985466 | 1.36E-06 | 4.81E-06 | 520 | 520 |
| RP1        | 0.209980457 | 1.36E-06 | 4.81E-06 | 520 | 482 |
| CREG2      | 0.20997553  | 1.36E-06 | 4.81E-06 | 520 | 488 |
| NCRNA00189 | 0.209910884 | 1.37E-06 | 4.85E-06 | 520 | 384 |
| IGSF9B     | 0.209640668 | 1.42E-06 | 5.00E-06 | 520 | 499 |
| FAM109B    | 0.209516919 | 1.44E-06 | 5.07E-06 | 520 | 520 |
| HOXC5      | 0.209428763 | 1.45E-06 | 5.12E-06 | 520 | 510 |
| TMSB15B    | 0.209423906 | 1.45E-06 | 5.12E-06 | 520 | 518 |
| CCDC63     | 0.20942159  | 1.45E-06 | 5.12E-06 | 520 | 167 |
| KCNS2      | 0.20940684  | 1.46E-06 | 5.13E-06 | 520 | 400 |
| TTC26      | 0.20931737  | 1.47E-06 | 5.18E-06 | 520 | 520 |
| MYLK3      | 0.209298423 | 1.47E-06 | 5.19E-06 | 520 | 511 |
| HGSNAT     | 0.209274693 | 1.48E-06 | 5.20E-06 | 520 | 520 |
| SLC12A8    | 0.209268574 | 1.48E-06 | 5.20E-06 | 520 | 520 |
| RABEP1     | 0.209249138 | 1.48E-06 | 5.21E-06 | 520 | 520 |
| TRAF6      | 0.209151438 | 1.50E-06 | 5.27E-06 | 520 | 520 |
| SPPL2A     | 0.209118997 | 1.51E-06 | 5.29E-06 | 520 | 520 |
| SNX14      | 0.209109037 | 1.51E-06 | 5.29E-06 | 520 | 520 |
| LPCAT1     | 0.209080324 | 1.51E-06 | 5.31E-06 | 520 | 520 |
| KPNA3      | 0.209007257 | 1.53E-06 | 5.35E-06 | 520 | 520 |
| KBTBD2     | 0.208992661 | 1.53E-06 | 5.36E-06 | 520 | 520 |
| LPPR2      | 0.208955256 | 1.54E-06 | 5.38E-06 | 520 | 520 |
| IPMK       | 0.208916999 | 1.54E-06 | 5.41E-06 | 520 | 515 |
| TAF1L      | 0.208885847 | 1.55E-06 | 5.43E-06 | 520 | 518 |
| LYPD1      | 0.208838846 | 1.56E-06 | 5.45E-06 | 520 | 520 |
| ERF        | 0.208825801 | 1.56E-06 | 5.46E-06 | 520 | 520 |
| ASB11      | 0.208726177 | 1.58E-06 | 5.52E-06 | 520 | 163 |
| TAF2       | 0.208693962 | 1.58E-06 | 5.54E-06 | 520 | 520 |
| MAN1C1     | 0.20865543  | 1.59E-06 | 5.57E-06 | 520 | 520 |
| PTCHD2     | 0.208646377 | 1.59E-06 | 5.57E-06 | 520 | 498 |
| SPAG9      | 0.208595285 | 1.60E-06 | 5.60E-06 | 520 | 520 |
| RBPJ       | 0.208564818 | 1.61E-06 | 5.62E-06 | 520 | 520 |
| PPP1R3B    | 0.208547424 | 1.61E-06 | 5.63E-06 | 520 | 520 |
| CD180      | 0.208478409 | 1.62E-06 | 5.67E-06 | 520 | 520 |
| NIN        | 0.208414973 | 1.64E-06 | 5.71E-06 | 520 | 520 |
| BTK        | 0.208414363 | 1.64E-06 | 5.71E-06 | 520 | 520 |
| C2orf40    | 0.208407736 | 1.64E-06 | 5.72E-06 | 520 | 428 |
| OSBP       | 0.208385546 | 1.64E-06 | 5.73E-06 | 520 | 520 |
| GOLGA9P    | 0.208323894 | 1.65E-06 | 5.77E-06 | 520 | 270 |
| QSOX1      | 0.20832144  | 1.65E-06 | 5.77E-06 | 520 | 520 |

|           |             |          |          |     |     |
|-----------|-------------|----------|----------|-----|-----|
| SCYL1     | 0.208321263 | 1.65E-06 | 5.77E-06 | 520 | 520 |
| IGFBP1    | 0.208319069 | 1.65E-06 | 5.77E-06 | 520 | 401 |
| ATP6V1C1  | 0.208317923 | 1.65E-06 | 5.77E-06 | 520 | 520 |
| MANEA     | 0.208284715 | 1.66E-06 | 5.79E-06 | 520 | 520 |
| LOC441208 | 0.20819481  | 1.68E-06 | 5.85E-06 | 520 | 520 |
| LFNG      | 0.208163946 | 1.68E-06 | 5.87E-06 | 520 | 520 |
| SLCO1C1   | 0.208093583 | 1.70E-06 | 5.92E-06 | 520 | 464 |
| CCDC50    | 0.208088334 | 1.70E-06 | 5.92E-06 | 520 | 520 |
| CAPN11    | 0.20807049  | 1.70E-06 | 5.93E-06 | 520 | 510 |
| GLI1      | 0.208067743 | 1.70E-06 | 5.93E-06 | 520 | 519 |
| CDH19     | 0.20790873  | 1.74E-06 | 6.04E-06 | 520 | 386 |
| TTC25     | 0.207877938 | 1.74E-06 | 6.06E-06 | 520 | 509 |
| TREM2     | 0.207847663 | 1.75E-06 | 6.08E-06 | 520 | 520 |
| GRM5      | 0.207831163 | 1.75E-06 | 6.09E-06 | 520 | 459 |
| TM9SF1    | 0.207800401 | 1.76E-06 | 6.11E-06 | 520 | 520 |
| SPANXN3   | 0.207789216 | 1.76E-06 | 6.12E-06 | 520 | 90  |
| GRIN2A    | 0.207754899 | 1.77E-06 | 6.14E-06 | 520 | 490 |
| BET3L     | 0.207707943 | 1.78E-06 | 6.17E-06 | 520 | 356 |
| C10orf11  | 0.207573493 | 1.81E-06 | 6.27E-06 | 520 | 520 |
| RFX3      | 0.207536132 | 1.81E-06 | 6.29E-06 | 520 | 518 |
| TSPAN7    | 0.207529478 | 1.81E-06 | 6.30E-06 | 520 | 520 |
| SERPINA6  | 0.207510923 | 1.82E-06 | 6.31E-06 | 520 | 369 |
| HIVEP1    | 0.207509205 | 1.82E-06 | 6.31E-06 | 520 | 520 |
| ATXN1L    | 0.207487804 | 1.82E-06 | 6.32E-06 | 520 | 520 |
| AGRN      | 0.207362762 | 1.85E-06 | 6.42E-06 | 520 | 520 |
| MPP2      | 0.207270451 | 1.87E-06 | 6.48E-06 | 520 | 519 |
| BMPR1B    | 0.207173083 | 1.89E-06 | 6.55E-06 | 520 | 518 |
| HCLS1     | 0.207119561 | 1.90E-06 | 6.59E-06 | 520 | 520 |
| NOMO1     | 0.207075248 | 1.91E-06 | 6.62E-06 | 520 | 520 |
| EIF4G3    | 0.207039053 | 1.92E-06 | 6.65E-06 | 520 | 520 |
| C19orf35  | 0.206974387 | 1.94E-06 | 6.69E-06 | 520 | 509 |
| UHMK1     | 0.206927995 | 1.95E-06 | 6.73E-06 | 520 | 520 |
| EIF4G2    | 0.206923201 | 1.95E-06 | 6.73E-06 | 520 | 520 |
| USP34     | 0.206849384 | 1.96E-06 | 6.79E-06 | 520 | 520 |
| IGSF1     | 0.206778598 | 1.98E-06 | 6.84E-06 | 520 | 487 |
| NCOA2     | 0.206605504 | 2.02E-06 | 6.97E-06 | 520 | 520 |
| FGD6      | 0.206502624 | 2.04E-06 | 7.05E-06 | 520 | 520 |
| CTSA      | 0.206502553 | 2.04E-06 | 7.05E-06 | 520 | 520 |
| DPEP2     | 0.206483752 | 2.05E-06 | 7.06E-06 | 520 | 520 |
| ERRF1     | 0.206468758 | 2.05E-06 | 7.07E-06 | 520 | 520 |
| SCN4B     | 0.206332181 | 2.09E-06 | 7.18E-06 | 520 | 520 |
| TMEM132A  | 0.206284219 | 2.10E-06 | 7.21E-06 | 520 | 520 |
| SEMA4C    | 0.20627618  | 2.10E-06 | 7.22E-06 | 520 | 520 |
| MAS1      | 0.206210248 | 2.12E-06 | 7.27E-06 | 520 | 100 |
| SNX20     | 0.206189742 | 2.12E-06 | 7.29E-06 | 520 | 519 |
| UFM1      | 0.206056887 | 2.15E-06 | 7.40E-06 | 520 | 520 |

|           |             |          |          |     |     |
|-----------|-------------|----------|----------|-----|-----|
| GNAZ      | 0.205921265 | 2.19E-06 | 7.50E-06 | 520 | 519 |
| CCDC62    | 0.205913997 | 2.19E-06 | 7.51E-06 | 520 | 491 |
| CYP26B1   | 0.205881115 | 2.20E-06 | 7.53E-06 | 520 | 520 |
| BMP2      | 0.205880667 | 2.20E-06 | 7.53E-06 | 520 | 520 |
| PCYT1B    | 0.205867353 | 2.20E-06 | 7.54E-06 | 520 | 497 |
| NEO1      | 0.205844536 | 2.21E-06 | 7.56E-06 | 520 | 520 |
| CAMK2B    | 0.205829574 | 2.21E-06 | 7.57E-06 | 520 | 515 |
| NR2C2     | 0.205747249 | 2.23E-06 | 7.64E-06 | 520 | 520 |
| WFDC1     | 0.20566273  | 2.25E-06 | 7.71E-06 | 520 | 520 |
| SCRG1     | 0.205582823 | 2.28E-06 | 7.78E-06 | 520 | 289 |
| NHLRC4    | 0.205574358 | 2.28E-06 | 7.79E-06 | 520 | 518 |
| ARSK      | 0.205547766 | 2.28E-06 | 7.81E-06 | 520 | 520 |
| PAX3      | 0.205522608 | 2.29E-06 | 7.83E-06 | 520 | 425 |
| PLEKHG1   | 0.2055203   | 2.29E-06 | 7.83E-06 | 520 | 520 |
| ZFX       | 0.205392308 | 2.33E-06 | 7.94E-06 | 520 | 520 |
| EGF       | 0.205366368 | 2.33E-06 | 7.96E-06 | 520 | 509 |
| NBPF10    | 0.205332858 | 2.34E-06 | 7.99E-06 | 520 | 520 |
| MAPK8IP1  | 0.205323341 | 2.34E-06 | 8.00E-06 | 520 | 520 |
| LOC285593 | 0.205258687 | 2.36E-06 | 8.05E-06 | 520 | 413 |
| RBM7      | 0.205243229 | 2.37E-06 | 8.06E-06 | 520 | 520 |
| SEMA3G    | 0.205212721 | 2.37E-06 | 8.09E-06 | 520 | 520 |
| LILRA3    | 0.205116908 | 2.40E-06 | 8.17E-06 | 520 | 512 |
| NXN       | 0.205075038 | 2.41E-06 | 8.21E-06 | 520 | 520 |
| ANKRD52   | 0.205001468 | 2.43E-06 | 8.28E-06 | 520 | 520 |
| PHF20L1   | 0.204926433 | 2.45E-06 | 8.35E-06 | 520 | 520 |
| ZNF805    | 0.204920635 | 2.46E-06 | 8.35E-06 | 520 | 520 |
| SH3BGR    | 0.204775445 | 2.50E-06 | 8.48E-06 | 520 | 520 |
| PRKCB     | 0.204775135 | 2.50E-06 | 8.48E-06 | 520 | 520 |
| PON2      | 0.204758899 | 2.50E-06 | 8.49E-06 | 520 | 520 |
| EN1       | 0.204731676 | 2.51E-06 | 8.52E-06 | 520 | 512 |
| SCN3B     | 0.204646993 | 2.53E-06 | 8.60E-06 | 520 | 519 |
| RNF175    | 0.204638092 | 2.54E-06 | 8.60E-06 | 520 | 517 |
| MAP3K7    | 0.204637577 | 2.54E-06 | 8.60E-06 | 520 | 520 |
| ZNF671    | 0.204391532 | 2.61E-06 | 8.84E-06 | 520 | 519 |
| CLEC4D    | 0.204367391 | 2.62E-06 | 8.86E-06 | 520 | 492 |
| BEX4      | 0.204311944 | 2.63E-06 | 8.92E-06 | 520 | 520 |
| CHD9      | 0.204268656 | 2.65E-06 | 8.96E-06 | 520 | 520 |
| KIF26A    | 0.204263784 | 2.65E-06 | 8.97E-06 | 520 | 520 |
| IRF8      | 0.204258275 | 2.65E-06 | 8.97E-06 | 520 | 520 |
| FAM135B   | 0.204238333 | 2.66E-06 | 8.99E-06 | 520 | 304 |
| RIMS4     | 0.204094295 | 2.70E-06 | 9.13E-06 | 520 | 460 |
| ZNF347    | 0.20402724  | 2.72E-06 | 9.20E-06 | 520 | 515 |
| CNN2      | 0.20399665  | 2.73E-06 | 9.23E-06 | 520 | 520 |
| ZNF844    | 0.203991493 | 2.73E-06 | 9.23E-06 | 520 | 518 |
| LOC388692 | 0.20391543  | 2.76E-06 | 9.31E-06 | 520 | 520 |
| CMA1      | 0.203842763 | 2.78E-06 | 9.38E-06 | 520 | 400 |

|           |             |          |          |     |     |
|-----------|-------------|----------|----------|-----|-----|
| S100A4    | 0.203793674 | 2.80E-06 | 9.43E-06 | 520 | 520 |
| RRN3P2    | 0.203771123 | 2.80E-06 | 9.46E-06 | 520 | 519 |
| EBF4      | 0.203745538 | 2.81E-06 | 9.48E-06 | 520 | 520 |
| SMTN      | 0.20370902  | 2.82E-06 | 9.52E-06 | 520 | 520 |
| BEND7     | 0.203687252 | 2.83E-06 | 9.54E-06 | 520 | 520 |
| CDK8      | 0.203686017 | 2.83E-06 | 9.54E-06 | 520 | 520 |
| RC3H2     | 0.203660047 | 2.84E-06 | 9.57E-06 | 520 | 520 |
| TNR       | 0.203656557 | 2.84E-06 | 9.57E-06 | 520 | 270 |
| PGM1      | 0.203636833 | 2.85E-06 | 9.59E-06 | 520 | 520 |
| CLPB      | 0.203588105 | 2.86E-06 | 9.63E-06 | 520 | 520 |
| WNT7A     | 0.203465987 | 2.90E-06 | 9.77E-06 | 520 | 511 |
| TREML2    | 0.203422927 | 2.92E-06 | 9.81E-06 | 520 | 511 |
| INMT      | 0.20311451  | 3.02E-06 | 1.02E-05 | 520 | 520 |
| KIAA1586  | 0.203094517 | 3.03E-06 | 1.02E-05 | 520 | 520 |
| TBC1D20   | 0.203089609 | 3.03E-06 | 1.02E-05 | 520 | 520 |
| LOC641367 | 0.203049683 | 3.04E-06 | 1.02E-05 | 520 | 518 |
| SYNPO2L   | 0.203031984 | 3.05E-06 | 1.02E-05 | 520 | 515 |
| PDZD2     | 0.203027383 | 3.05E-06 | 1.02E-05 | 520 | 520 |
| CREM      | 0.202932009 | 3.09E-06 | 1.04E-05 | 520 | 520 |
| HSPA5     | 0.202863699 | 3.11E-06 | 1.04E-05 | 520 | 520 |
| CHM       | 0.202827746 | 3.12E-06 | 1.05E-05 | 520 | 520 |
| MIA3      | 0.202822217 | 3.12E-06 | 1.05E-05 | 520 | 520 |
| PROCR     | 0.202776562 | 3.14E-06 | 1.05E-05 | 520 | 520 |
| ZXDA      | 0.20274283  | 3.15E-06 | 1.06E-05 | 520 | 519 |
| SNCA      | 0.202700855 | 3.17E-06 | 1.06E-05 | 520 | 520 |
| HAAO      | 0.202660378 | 3.18E-06 | 1.07E-05 | 520 | 519 |
| CX3CR1    | 0.202582791 | 3.21E-06 | 1.07E-05 | 520 | 516 |
| PHF21A    | 0.202543941 | 3.23E-06 | 1.08E-05 | 520 | 520 |
| ANKRD7    | 0.202534172 | 3.23E-06 | 1.08E-05 | 520 | 285 |
| PLA2G2A   | 0.202523646 | 3.23E-06 | 1.08E-05 | 520 | 505 |
| BCL2A1    | 0.202467366 | 3.25E-06 | 1.09E-05 | 520 | 520 |
| PRPS1L1   | 0.202341221 | 3.30E-06 | 1.10E-05 | 520 | 453 |
| GNAO1     | 0.20233665  | 3.30E-06 | 1.10E-05 | 520 | 520 |
| DDB1      | 0.20229574  | 3.32E-06 | 1.11E-05 | 520 | 520 |
| C5orf15   | 0.202282533 | 3.32E-06 | 1.11E-05 | 520 | 520 |
| KLF13     | 0.202265735 | 3.33E-06 | 1.11E-05 | 520 | 520 |
| CDK5R2    | 0.20224136  | 3.34E-06 | 1.11E-05 | 520 | 389 |
| IRGM      | 0.202186154 | 3.36E-06 | 1.12E-05 | 520 | 393 |
| MFSD7     | 0.202124275 | 3.38E-06 | 1.13E-05 | 520 | 520 |
| PRRX2     | 0.20210508  | 3.39E-06 | 1.13E-05 | 520 | 520 |
| TSC22D1   | 0.202063225 | 3.41E-06 | 1.14E-05 | 520 | 520 |
| BTN3A1    | 0.202013151 | 3.43E-06 | 1.14E-05 | 520 | 520 |
| GLUD2     | 0.202006908 | 3.43E-06 | 1.14E-05 | 520 | 520 |
| YIPF3     | 0.201947209 | 3.45E-06 | 1.15E-05 | 520 | 520 |
| COL6A6    | 0.20193407  | 3.46E-06 | 1.15E-05 | 520 | 509 |
| RNF130    | 0.201864884 | 3.48E-06 | 1.16E-05 | 520 | 520 |

|           |             |          |          |     |     |
|-----------|-------------|----------|----------|-----|-----|
| ACCN1     | 0.201856843 | 3.49E-06 | 1.16E-05 | 520 | 411 |
| COL23A1   | 0.201851024 | 3.49E-06 | 1.16E-05 | 520 | 520 |
| HCRTR2    | 0.201846249 | 3.49E-06 | 1.16E-05 | 520 | 262 |
| PAC SIN1  | 0.201815227 | 3.50E-06 | 1.17E-05 | 520 | 513 |
| ADNP      | 0.201752887 | 3.53E-06 | 1.17E-05 | 520 | 520 |
| FAM65B    | 0.2017326   | 3.54E-06 | 1.18E-05 | 520 | 520 |
| CCDC144B  | 0.201656491 | 3.57E-06 | 1.19E-05 | 520 | 503 |
| TSPAN12   | 0.201586289 | 3.60E-06 | 1.20E-05 | 520 | 519 |
| B3GALT1   | 0.201556204 | 3.61E-06 | 1.20E-05 | 520 | 300 |
| GABRR2    | 0.201420404 | 3.66E-06 | 1.22E-05 | 520 | 396 |
| PRKAA1    | 0.201372803 | 3.68E-06 | 1.22E-05 | 520 | 520 |
| LRRC49    | 0.201349836 | 3.69E-06 | 1.23E-05 | 520 | 520 |
| SPANXC    | 0.201336292 | 3.70E-06 | 1.23E-05 | 520 | 232 |
| CHRNA6    | 0.201316304 | 3.71E-06 | 1.23E-05 | 520 | 463 |
| DCAF5     | 0.201229361 | 3.74E-06 | 1.24E-05 | 520 | 520 |
| RAB3GAP2  | 0.201226833 | 3.75E-06 | 1.24E-05 | 520 | 520 |
| KIF3B     | 0.201221462 | 3.75E-06 | 1.24E-05 | 520 | 520 |
| NAT8L     | 0.201082165 | 3.81E-06 | 1.26E-05 | 520 | 507 |
| MPHOSPH9  | 0.201050656 | 3.82E-06 | 1.27E-05 | 520 | 520 |
| GPIHBP1   | 0.201015502 | 3.84E-06 | 1.27E-05 | 520 | 504 |
| RNF169    | 0.201001918 | 3.84E-06 | 1.27E-05 | 520 | 520 |
| SLC38A11  | 0.201001244 | 3.84E-06 | 1.27E-05 | 520 | 465 |
| TIRAP     | 0.200888422 | 3.89E-06 | 1.29E-05 | 520 | 520 |
| C17orf103 | 0.200880317 | 3.90E-06 | 1.29E-05 | 520 | 520 |
| CPNE2     | 0.200847611 | 3.91E-06 | 1.29E-05 | 520 | 520 |
| KRBA1     | 0.20079516  | 3.93E-06 | 1.30E-05 | 520 | 520 |
| HOXC11    | 0.200733546 | 3.96E-06 | 1.31E-05 | 520 | 494 |
| RYBP      | 0.20071238  | 3.97E-06 | 1.31E-05 | 520 | 520 |
| MED1      | 0.200688038 | 3.98E-06 | 1.31E-05 | 520 | 520 |
| RNF214    | 0.200662437 | 3.99E-06 | 1.32E-05 | 520 | 520 |
| P2RY8     | 0.200651009 | 4.00E-06 | 1.32E-05 | 520 | 520 |
| PCTP      | 0.200619774 | 4.01E-06 | 1.32E-05 | 520 | 520 |
| MFI2      | 0.200569011 | 4.03E-06 | 1.33E-05 | 520 | 520 |
| SIGLEC12  | 0.200564751 | 4.04E-06 | 1.33E-05 | 520 | 512 |
| GHR       | 0.200521234 | 4.06E-06 | 1.34E-05 | 520 | 519 |
| NRGN      | 0.200458579 | 4.09E-06 | 1.34E-05 | 520 | 520 |
| LYSMD3    | 0.20044965  | 4.09E-06 | 1.35E-05 | 520 | 520 |
| MCART6    | 0.200378735 | 4.12E-06 | 1.36E-05 | 520 | 516 |
| C22orf9   | 0.200362897 | 4.13E-06 | 1.36E-05 | 520 | 520 |
| ZBTB8A    | 0.200334034 | 4.14E-06 | 1.36E-05 | 520 | 520 |
| CACHD1    | 0.200313796 | 4.15E-06 | 1.37E-05 | 520 | 520 |
| FNBP1L    | 0.200245593 | 4.18E-06 | 1.38E-05 | 520 | 520 |
| ZNF625    | 0.20021473  | 4.20E-06 | 1.38E-05 | 520 | 499 |
| CACNG8    | 0.200123426 | 4.24E-06 | 1.39E-05 | 520 | 117 |
| CFI       | 0.200117345 | 4.25E-06 | 1.39E-05 | 520 | 520 |
| UBXN7     | 0.199984077 | 4.31E-06 | 1.41E-05 | 520 | 520 |



|            |             |          |          |     |     |
|------------|-------------|----------|----------|-----|-----|
| ELAVL4     | 0.199956724 | 4.32E-06 | 1.42E-05 | 520 | 433 |
| PCDHB19P   | 0.199947748 | 4.33E-06 | 1.42E-05 | 520 | 503 |
| TRIM72     | 0.199930326 | 4.34E-06 | 1.42E-05 | 520 | 425 |
| SIK3       | 0.19981132  | 4.39E-06 | 1.44E-05 | 520 | 520 |
| PIPOX      | 0.199768509 | 4.42E-06 | 1.45E-05 | 520 | 520 |
| MGC16703   | 0.199756669 | 4.42E-06 | 1.45E-05 | 520 | 508 |
| MORN4      | 0.199714147 | 4.44E-06 | 1.45E-05 | 520 | 520 |
| PSG2       | 0.199675812 | 4.46E-06 | 1.46E-05 | 520 | 131 |
| INSC       | 0.19958224  | 4.51E-06 | 1.47E-05 | 520 | 432 |
| CACNB2     | 0.199569817 | 4.51E-06 | 1.48E-05 | 520 | 517 |
| IGFBP3     | 0.199437351 | 4.58E-06 | 1.50E-05 | 520 | 520 |
| MLEC       | 0.19939546  | 4.60E-06 | 1.50E-05 | 520 | 520 |
| FBXO31     | 0.199383087 | 4.61E-06 | 1.51E-05 | 520 | 520 |
| RDH5       | 0.199267399 | 4.67E-06 | 1.52E-05 | 520 | 520 |
| FITM2      | 0.19925328  | 4.68E-06 | 1.53E-05 | 520 | 520 |
| PHLDB2     | 0.199253136 | 4.68E-06 | 1.53E-05 | 520 | 520 |
| RNF157     | 0.199203632 | 4.70E-06 | 1.53E-05 | 520 | 519 |
| PRKACA     | 0.19918374  | 4.71E-06 | 1.54E-05 | 520 | 520 |
| CD37       | 0.199178324 | 4.72E-06 | 1.54E-05 | 520 | 520 |
| OSBPL9     | 0.199028999 | 4.80E-06 | 1.56E-05 | 520 | 520 |
| FHAD1      | 0.198987457 | 4.82E-06 | 1.57E-05 | 520 | 520 |
| SPIRE1     | 0.198973279 | 4.83E-06 | 1.57E-05 | 520 | 520 |
| POLR1A     | 0.198930593 | 4.85E-06 | 1.58E-05 | 520 | 520 |
| GYPE       | 0.198930423 | 4.85E-06 | 1.58E-05 | 520 | 490 |
| FAM66E     | 0.19892169  | 4.86E-06 | 1.58E-05 | 520 | 220 |
| MERTK      | 0.198896845 | 4.87E-06 | 1.58E-05 | 520 | 519 |
| CSRNP3     | 0.198892463 | 4.87E-06 | 1.58E-05 | 520 | 462 |
| HMOX1      | 0.198869799 | 4.88E-06 | 1.59E-05 | 520 | 520 |
| SRPK2      | 0.19886684  | 4.88E-06 | 1.59E-05 | 520 | 520 |
| SETX       | 0.198855841 | 4.89E-06 | 1.59E-05 | 520 | 520 |
| ANKRD36BP1 | 0.198839929 | 4.90E-06 | 1.59E-05 | 520 | 517 |
| FAM118B    | 0.198795817 | 4.92E-06 | 1.60E-05 | 520 | 520 |
| CDH10      | 0.19876432  | 4.94E-06 | 1.60E-05 | 520 | 180 |
| FAM133A    | 0.198592068 | 5.04E-06 | 1.63E-05 | 520 | 302 |
| IFT52      | 0.19857156  | 5.05E-06 | 1.64E-05 | 520 | 520 |
| MOSPD2     | 0.198527549 | 5.07E-06 | 1.64E-05 | 520 | 520 |
| ZNF285     | 0.198396943 | 5.15E-06 | 1.67E-05 | 520 | 513 |
| TRIB2      | 0.198390663 | 5.15E-06 | 1.67E-05 | 520 | 520 |
| PDIA3P     | 0.19829186  | 5.21E-06 | 1.69E-05 | 520 | 520 |
| PI16       | 0.198249609 | 5.23E-06 | 1.69E-05 | 520 | 501 |
| CGB7       | 0.198167697 | 5.28E-06 | 1.71E-05 | 520 | 520 |
| AIF1       | 0.198101399 | 5.32E-06 | 1.72E-05 | 520 | 520 |
| TLR1       | 0.19809688  | 5.32E-06 | 1.72E-05 | 520 | 520 |
| FBXO36     | 0.198065889 | 5.34E-06 | 1.73E-05 | 520 | 520 |
| ICAM5      | 0.198061008 | 5.34E-06 | 1.73E-05 | 520 | 520 |
| GLT25D2    | 0.198038122 | 5.36E-06 | 1.73E-05 | 520 | 520 |

|          |             |          |          |     |     |
|----------|-------------|----------|----------|-----|-----|
| ZFP28    | 0.198034264 | 5.36E-06 | 1.73E-05 | 520 | 518 |
| FAM107B  | 0.198015732 | 5.37E-06 | 1.73E-05 | 520 | 520 |
| PLTP     | 0.197954926 | 5.41E-06 | 1.75E-05 | 520 | 520 |
| CTBS     | 0.19778134  | 5.51E-06 | 1.78E-05 | 520 | 520 |
| IL21R    | 0.197753713 | 5.53E-06 | 1.78E-05 | 520 | 520 |
| HMGA2    | 0.197748754 | 5.53E-06 | 1.78E-05 | 520 | 517 |
| LBX1     | 0.197697936 | 5.57E-06 | 1.79E-05 | 520 | 242 |
| CSRP1    | 0.197664019 | 5.59E-06 | 1.80E-05 | 520 | 520 |
| CLIC5    | 0.19765854  | 5.59E-06 | 1.80E-05 | 520 | 518 |
| SLC35F3  | 0.197609994 | 5.62E-06 | 1.81E-05 | 520 | 515 |
| NPHP4    | 0.197593215 | 5.63E-06 | 1.81E-05 | 520 | 520 |
| GLP1R    | 0.197563333 | 5.65E-06 | 1.82E-05 | 520 | 418 |
| DGKH     | 0.197562107 | 5.65E-06 | 1.82E-05 | 520 | 520 |
| MS4A6E   | 0.197531625 | 5.67E-06 | 1.82E-05 | 520 | 156 |
| ATF6     | 0.197437492 | 5.73E-06 | 1.84E-05 | 520 | 520 |
| LRRC70   | 0.197397201 | 5.75E-06 | 1.85E-05 | 520 | 520 |
| TRIP12   | 0.197395718 | 5.76E-06 | 1.85E-05 | 520 | 520 |
| SEMA3B   | 0.197387525 | 5.76E-06 | 1.85E-05 | 520 | 520 |
| TNRC6B   | 0.197289096 | 5.82E-06 | 1.87E-05 | 520 | 520 |
| HDGFL1   | 0.197098339 | 5.95E-06 | 1.91E-05 | 520 | 173 |
| STX1A    | 0.197082628 | 5.96E-06 | 1.91E-05 | 520 | 520 |
| CLCN6    | 0.197001439 | 6.01E-06 | 1.93E-05 | 520 | 520 |
| ADD2     | 0.196864984 | 6.10E-06 | 1.95E-05 | 520 | 513 |
| ARHGAP17 | 0.196837376 | 6.12E-06 | 1.96E-05 | 520 | 520 |
| SH3GLB1  | 0.196714687 | 6.21E-06 | 1.98E-05 | 520 | 520 |
| CYBASC3  | 0.196681909 | 6.23E-06 | 1.99E-05 | 520 | 520 |
| DHRX     | 0.196642489 | 6.26E-06 | 2.00E-05 | 520 | 520 |
| P2RY12   | 0.196600612 | 6.29E-06 | 2.01E-05 | 520 | 465 |
| TRIM56   | 0.19657132  | 6.31E-06 | 2.01E-05 | 520 | 520 |
| COLQ     | 0.196483563 | 6.37E-06 | 2.03E-05 | 520 | 518 |
| HERPUD1  | 0.196265191 | 6.52E-06 | 2.08E-05 | 520 | 520 |
| TMEM150A | 0.196230203 | 6.55E-06 | 2.09E-05 | 520 | 520 |
| TWF2     | 0.196207313 | 6.56E-06 | 2.09E-05 | 520 | 520 |
| C6orf89  | 0.196192361 | 6.58E-06 | 2.10E-05 | 520 | 520 |
| RGPD5    | 0.196102044 | 6.64E-06 | 2.12E-05 | 520 | 511 |
| MAPK12   | 0.196051393 | 6.68E-06 | 2.13E-05 | 520 | 520 |
| MED12    | 0.196050895 | 6.68E-06 | 2.13E-05 | 520 | 520 |
| TRPM8    | 0.196003518 | 6.71E-06 | 2.14E-05 | 520 | 435 |
| CALCR    | 0.1959769   | 6.73E-06 | 2.14E-05 | 520 | 449 |
| DPP9     | 0.195899937 | 6.79E-06 | 2.16E-05 | 520 | 520 |
| IBTK     | 0.195741128 | 6.91E-06 | 2.20E-05 | 520 | 520 |
| ODF3L1   | 0.195733449 | 6.92E-06 | 2.20E-05 | 520 | 518 |
| MOBKL1B  | 0.195714535 | 6.93E-06 | 2.20E-05 | 520 | 520 |
| MOV10L1  | 0.195601189 | 7.02E-06 | 2.23E-05 | 520 | 512 |
| PCNXL2   | 0.195573766 | 7.04E-06 | 2.24E-05 | 520 | 520 |
| FOXA2    | 0.195545627 | 7.06E-06 | 2.24E-05 | 520 | 424 |

|           |             |          |          |     |     |
|-----------|-------------|----------|----------|-----|-----|
| PTPRA     | 0.195482018 | 7.11E-06 | 2.26E-05 | 520 | 520 |
| DUPD1     | 0.195474162 | 7.12E-06 | 2.26E-05 | 520 | 194 |
| COL4A3    | 0.19537786  | 7.19E-06 | 2.28E-05 | 520 | 494 |
| ZNF304    | 0.19537599  | 7.19E-06 | 2.28E-05 | 520 | 520 |
| SESN3     | 0.195297896 | 7.26E-06 | 2.30E-05 | 520 | 520 |
| CTNNAL1   | 0.195295928 | 7.26E-06 | 2.30E-05 | 520 | 520 |
| RB1CC1    | 0.195253948 | 7.29E-06 | 2.31E-05 | 520 | 520 |
| DDI2      | 0.195230087 | 7.31E-06 | 2.31E-05 | 520 | 516 |
| C16orf54  | 0.19517103  | 7.36E-06 | 2.33E-05 | 520 | 520 |
| PVR       | 0.195160444 | 7.37E-06 | 2.33E-05 | 520 | 520 |
| RDX       | 0.195157389 | 7.37E-06 | 2.33E-05 | 520 | 520 |
| SIPA1     | 0.195128601 | 7.39E-06 | 2.34E-05 | 520 | 520 |
| TRIM54    | 0.195033745 | 7.47E-06 | 2.36E-05 | 520 | 438 |
| NCOR1     | 0.195025593 | 7.48E-06 | 2.36E-05 | 520 | 520 |
| WLS       | 0.195020418 | 7.48E-06 | 2.36E-05 | 520 | 520 |
| USP47     | 0.194989789 | 7.51E-06 | 2.37E-05 | 520 | 520 |
| LDOC1     | 0.194954019 | 7.54E-06 | 2.38E-05 | 520 | 520 |
| FZD3      | 0.194936491 | 7.55E-06 | 2.38E-05 | 520 | 520 |
| ZNF334    | 0.194801962 | 7.66E-06 | 2.42E-05 | 520 | 513 |
| PRKAA2    | 0.194733586 | 7.72E-06 | 2.43E-05 | 520 | 513 |
| HCN1      | 0.194699262 | 7.75E-06 | 2.44E-05 | 520 | 160 |
| TBCK      | 0.194670717 | 7.77E-06 | 2.45E-05 | 520 | 520 |
| MAPK1     | 0.194630424 | 7.81E-06 | 2.46E-05 | 520 | 520 |
| CUX1      | 0.194615427 | 7.82E-06 | 2.46E-05 | 520 | 520 |
| PDK3      | 0.194591192 | 7.84E-06 | 2.47E-05 | 520 | 520 |
| REEP2     | 0.194435212 | 7.98E-06 | 2.51E-05 | 520 | 520 |
| ALS2      | 0.194434378 | 7.98E-06 | 2.51E-05 | 520 | 520 |
| SAMHD1    | 0.194423577 | 7.99E-06 | 2.51E-05 | 520 | 520 |
| FKBP11    | 0.194374177 | 8.03E-06 | 2.52E-05 | 520 | 520 |
| RNASE3    | 0.194364174 | 8.04E-06 | 2.53E-05 | 520 | 334 |
| SLC25A30  | 0.194321795 | 8.08E-06 | 2.54E-05 | 520 | 520 |
| MTSS1L    | 0.194307015 | 8.09E-06 | 2.54E-05 | 520 | 520 |
| LMX1A     | 0.194122399 | 8.25E-06 | 2.59E-05 | 520 | 267 |
| C8orf22   | 0.194117761 | 8.26E-06 | 2.59E-05 | 520 | 183 |
| GATC      | 0.194114498 | 8.26E-06 | 2.59E-05 | 520 | 520 |
| SLC9A5    | 0.194078357 | 8.29E-06 | 2.60E-05 | 520 | 520 |
| RAPGEF6   | 0.194056301 | 8.31E-06 | 2.61E-05 | 520 | 520 |
| ETV3      | 0.194034515 | 8.33E-06 | 2.61E-05 | 520 | 520 |
| ZNF701    | 0.19393095  | 8.43E-06 | 2.64E-05 | 520 | 519 |
| ACBD3     | 0.193902403 | 8.45E-06 | 2.65E-05 | 520 | 520 |
| ZFP90     | 0.193850872 | 8.50E-06 | 2.66E-05 | 520 | 520 |
| LOC401463 | 0.193781195 | 8.57E-06 | 2.68E-05 | 520 | 356 |
| LOC338758 | 0.193755104 | 8.59E-06 | 2.69E-05 | 520 | 520 |
| RHOJ      | 0.193751885 | 8.59E-06 | 2.69E-05 | 520 | 520 |
| STEAP1    | 0.193722414 | 8.62E-06 | 2.70E-05 | 520 | 520 |
| SLC29A4   | 0.193711508 | 8.63E-06 | 2.70E-05 | 520 | 520 |

|             |             |          |          |     |     |
|-------------|-------------|----------|----------|-----|-----|
| C13orf16    | 0.193673595 | 8.67E-06 | 2.71E-05 | 520 | 493 |
| ALK         | 0.193636246 | 8.70E-06 | 2.72E-05 | 520 | 444 |
| RAB33A      | 0.193490498 | 8.84E-06 | 2.76E-05 | 520 | 519 |
| RERE        | 0.193438312 | 8.89E-06 | 2.78E-05 | 520 | 520 |
| ZNF713      | 0.19343795  | 8.89E-06 | 2.78E-05 | 520 | 519 |
| CRK         | 0.193430451 | 8.90E-06 | 2.78E-05 | 520 | 520 |
| C10orf12    | 0.193411652 | 8.92E-06 | 2.79E-05 | 520 | 520 |
| HMX1        | 0.193374607 | 8.95E-06 | 2.80E-05 | 520 | 433 |
| SIRPD       | 0.193223146 | 9.10E-06 | 2.84E-05 | 520 | 227 |
| ZNF45       | 0.193214064 | 9.11E-06 | 2.84E-05 | 520 | 520 |
| MYOM2       | 0.193208938 | 9.12E-06 | 2.84E-05 | 520 | 517 |
| ZNF678      | 0.193202992 | 9.12E-06 | 2.84E-05 | 520 | 518 |
| RIC8B       | 0.193180464 | 9.15E-06 | 2.85E-05 | 520 | 520 |
| CSNK2A2     | 0.193137002 | 9.19E-06 | 2.86E-05 | 520 | 520 |
| SOX9        | 0.193071137 | 9.25E-06 | 2.88E-05 | 520 | 520 |
| MDFIC       | 0.193065605 | 9.26E-06 | 2.88E-05 | 520 | 520 |
| AFF3        | 0.193047626 | 9.28E-06 | 2.89E-05 | 520 | 510 |
| KIRREL3     | 0.193028493 | 9.30E-06 | 2.89E-05 | 520 | 482 |
| ELF4        | 0.192917696 | 9.41E-06 | 2.92E-05 | 520 | 520 |
| GPAT2       | 0.19286949  | 9.46E-06 | 2.94E-05 | 520 | 519 |
| PAPOLG      | 0.192688768 | 9.65E-06 | 2.99E-05 | 520 | 520 |
| DDHD1       | 0.192563258 | 9.78E-06 | 3.03E-05 | 520 | 520 |
| ATP2A1      | 0.192562014 | 9.78E-06 | 3.03E-05 | 520 | 520 |
| SLC7A8      | 0.192548621 | 9.79E-06 | 3.04E-05 | 520 | 520 |
| KLHL20      | 0.19250176  | 9.84E-06 | 3.05E-05 | 520 | 520 |
| GPR155      | 0.192455214 | 9.89E-06 | 3.07E-05 | 520 | 520 |
| TMEM167B    | 0.192453124 | 9.90E-06 | 3.07E-05 | 520 | 520 |
| C10orf55    | 0.192444881 | 9.91E-06 | 3.07E-05 | 520 | 519 |
| ZNF439      | 0.192427999 | 9.92E-06 | 3.07E-05 | 520 | 519 |
| FXYD5       | 0.192417343 | 9.93E-06 | 3.08E-05 | 520 | 520 |
| GALNTL6     | 0.192407923 | 9.94E-06 | 3.08E-05 | 520 | 284 |
| NAV2        | 0.192406352 | 9.95E-06 | 3.08E-05 | 520 | 520 |
| SEZ6L2      | 0.192348416 | 1.00E-05 | 3.10E-05 | 520 | 520 |
| FCHSD2      | 0.192304173 | 1.01E-05 | 3.11E-05 | 520 | 520 |
| FAM48A      | 0.192211392 | 1.02E-05 | 3.14E-05 | 520 | 520 |
| FUBP1       | 0.192190262 | 1.02E-05 | 3.15E-05 | 520 | 520 |
| C20orf94    | 0.192181261 | 1.02E-05 | 3.15E-05 | 520 | 516 |
| RGPD6       | 0.192167347 | 1.02E-05 | 3.15E-05 | 520 | 520 |
| RPN2        | 0.192048894 | 1.03E-05 | 3.19E-05 | 520 | 520 |
| NT5C1A      | 0.192035855 | 1.04E-05 | 3.19E-05 | 520 | 209 |
| SNORD116-28 | 0.19189561  | 1.05E-05 | 3.24E-05 | 520 | 450 |
| HIPK2       | 0.191869569 | 1.05E-05 | 3.25E-05 | 520 | 520 |
| FJX1        | 0.191855469 | 1.06E-05 | 3.25E-05 | 520 | 520 |
| KIAA0240    | 0.191807387 | 1.06E-05 | 3.27E-05 | 520 | 520 |
| KCNK9       | 0.191722692 | 1.07E-05 | 3.30E-05 | 520 | 495 |
| BTBD8       | 0.191685718 | 1.08E-05 | 3.31E-05 | 520 | 482 |

|            |             |          |          |     |     |
|------------|-------------|----------|----------|-----|-----|
| FOSL2      | 0.191660341 | 1.08E-05 | 3.32E-05 | 520 | 520 |
| C19orf55   | 0.191610358 | 1.08E-05 | 3.33E-05 | 520 | 520 |
| AJAP1      | 0.191503696 | 1.10E-05 | 3.37E-05 | 520 | 518 |
| NCRNA00182 | 0.191385427 | 1.11E-05 | 3.41E-05 | 520 | 519 |
| ZNF222     | 0.191379107 | 1.11E-05 | 3.41E-05 | 520 | 520 |
| CPS1       | 0.191333617 | 1.12E-05 | 3.42E-05 | 520 | 518 |
| GAA        | 0.191320024 | 1.12E-05 | 3.43E-05 | 520 | 520 |
| EMR1       | 0.191165683 | 1.14E-05 | 3.48E-05 | 520 | 518 |
| SMARCD1    | 0.191160155 | 1.14E-05 | 3.49E-05 | 520 | 520 |
| KPNA5      | 0.191128565 | 1.14E-05 | 3.50E-05 | 520 | 520 |
| KIAA1161   | 0.190947874 | 1.16E-05 | 3.56E-05 | 520 | 520 |
| MLPH       | 0.190917911 | 1.17E-05 | 3.57E-05 | 520 | 520 |
| DOK3       | 0.19090532  | 1.17E-05 | 3.58E-05 | 520 | 520 |
| C5orf53    | 0.19087268  | 1.17E-05 | 3.59E-05 | 520 | 520 |
| GIMAP1     | 0.190859968 | 1.18E-05 | 3.59E-05 | 520 | 520 |
| ZKSCAN1    | 0.190841251 | 1.18E-05 | 3.60E-05 | 520 | 520 |
| LRRK1      | 0.190759515 | 1.19E-05 | 3.63E-05 | 520 | 520 |
| STAU1      | 0.190739576 | 1.19E-05 | 3.64E-05 | 520 | 520 |
| ABR        | 0.190705764 | 1.19E-05 | 3.65E-05 | 520 | 520 |
| C8orf37    | 0.190634547 | 1.20E-05 | 3.68E-05 | 520 | 519 |
| FBXL4      | 0.190587761 | 1.21E-05 | 3.69E-05 | 520 | 520 |
| FAM164A    | 0.190436289 | 1.23E-05 | 3.75E-05 | 520 | 520 |
| PTDSS1     | 0.190403099 | 1.23E-05 | 3.76E-05 | 520 | 520 |
| CREB3      | 0.190357888 | 1.24E-05 | 3.78E-05 | 520 | 520 |
| HEATR1     | 0.190355993 | 1.24E-05 | 3.78E-05 | 520 | 520 |
| SEC61A1    | 0.190264319 | 1.25E-05 | 3.81E-05 | 520 | 520 |
| RALGAPB    | 0.190078561 | 1.28E-05 | 3.89E-05 | 520 | 520 |
| DTX3       | 0.190069339 | 1.28E-05 | 3.89E-05 | 520 | 520 |
| C9orf5     | 0.189949948 | 1.30E-05 | 3.94E-05 | 520 | 520 |
| MARCO      | 0.189830709 | 1.31E-05 | 3.98E-05 | 520 | 520 |
| 6-Mar      | 0.189721048 | 1.33E-05 | 4.03E-05 | 520 | 520 |
| APOB       | 0.189697742 | 1.33E-05 | 4.04E-05 | 520 | 413 |
| MED13      | 0.189576936 | 1.35E-05 | 4.09E-05 | 520 | 520 |
| OPHN1      | 0.18952245  | 1.36E-05 | 4.11E-05 | 520 | 520 |
| CAPZA2     | 0.189503381 | 1.36E-05 | 4.12E-05 | 520 | 520 |
| FRS2       | 0.189460039 | 1.37E-05 | 4.13E-05 | 520 | 520 |
| NCEH1      | 0.18944767  | 1.37E-05 | 4.14E-05 | 520 | 520 |
| PFKM       | 0.189374267 | 1.38E-05 | 4.17E-05 | 520 | 520 |
| FOXD1      | 0.189317697 | 1.39E-05 | 4.20E-05 | 520 | 520 |
| PPIL4      | 0.189299937 | 1.39E-05 | 4.20E-05 | 520 | 520 |
| TNFRSF1A   | 0.189210502 | 1.40E-05 | 4.24E-05 | 520 | 520 |
| TTLL2      | 0.189142565 | 1.41E-05 | 4.27E-05 | 520 | 252 |
| C20orf117  | 0.189133781 | 1.41E-05 | 4.27E-05 | 520 | 520 |
| TSTD2      | 0.189125287 | 1.41E-05 | 4.28E-05 | 520 | 520 |
| RPL3L      | 0.18911694  | 1.42E-05 | 4.28E-05 | 520 | 508 |
| C3orf72    | 0.189059054 | 1.42E-05 | 4.30E-05 | 520 | 478 |

|             |             |          |          |     |     |
|-------------|-------------|----------|----------|-----|-----|
| PIP5K1P1    | 0.189058014 | 1.42E-05 | 4.30E-05 | 520 | 509 |
| ZNF776      | 0.189052175 | 1.43E-05 | 4.31E-05 | 520 | 520 |
| GPR82       | 0.189034438 | 1.43E-05 | 4.31E-05 | 520 | 508 |
| CSRN1P1     | 0.189028486 | 1.43E-05 | 4.31E-05 | 520 | 520 |
| JRKL        | 0.189025273 | 1.43E-05 | 4.32E-05 | 520 | 520 |
| LGR4        | 0.189000111 | 1.43E-05 | 4.33E-05 | 520 | 520 |
| NUCB1       | 0.188962986 | 1.44E-05 | 4.34E-05 | 520 | 520 |
| HOXB5       | 0.188893877 | 1.45E-05 | 4.37E-05 | 520 | 509 |
| TRAF1       | 0.188888403 | 1.45E-05 | 4.38E-05 | 520 | 520 |
| ANKRD17     | 0.188878398 | 1.45E-05 | 4.38E-05 | 520 | 520 |
| ATP6AP2     | 0.188830536 | 1.46E-05 | 4.40E-05 | 520 | 520 |
| CD226       | 0.18879757  | 1.46E-05 | 4.41E-05 | 520 | 511 |
| GPR123      | 0.188735316 | 1.47E-05 | 4.44E-05 | 520 | 349 |
| TMPPE       | 0.188714207 | 1.48E-05 | 4.45E-05 | 520 | 520 |
| OGFOD1      | 0.188687582 | 1.48E-05 | 4.46E-05 | 520 | 520 |
| SYS1-DBNDD2 | 0.188624109 | 1.49E-05 | 4.49E-05 | 520 | 485 |
| ZSCAN18     | 0.1885945   | 1.50E-05 | 4.50E-05 | 520 | 520 |
| LMBR1       | 0.188566822 | 1.50E-05 | 4.51E-05 | 520 | 520 |
| NFYA        | 0.188516034 | 1.51E-05 | 4.54E-05 | 520 | 520 |
| PIK3CA      | 0.188511529 | 1.51E-05 | 4.54E-05 | 520 | 520 |
| TRPS1       | 0.188466583 | 1.52E-05 | 4.56E-05 | 520 | 520 |
| FMNL2       | 0.188387588 | 1.53E-05 | 4.60E-05 | 520 | 520 |
| LOC645752   | 0.1883786   | 1.53E-05 | 4.60E-05 | 520 | 152 |
| DDX21       | 0.188328305 | 1.54E-05 | 4.62E-05 | 520 | 520 |
| ZNF616      | 0.188314356 | 1.54E-05 | 4.63E-05 | 520 | 520 |
| SUFU        | 0.188288353 | 1.55E-05 | 4.64E-05 | 520 | 520 |
| TMEM163     | 0.188171414 | 1.57E-05 | 4.69E-05 | 520 | 517 |
| PFAS        | 0.188139876 | 1.57E-05 | 4.71E-05 | 520 | 520 |
| SMAD4       | 0.188044864 | 1.59E-05 | 4.75E-05 | 520 | 520 |
| UTP20       | 0.188039824 | 1.59E-05 | 4.75E-05 | 520 | 520 |
| BPGM        | 0.188004393 | 1.59E-05 | 4.77E-05 | 520 | 520 |
| TTC17       | 0.187996407 | 1.59E-05 | 4.77E-05 | 520 | 520 |
| GPRASP2     | 0.187984307 | 1.60E-05 | 4.78E-05 | 520 | 520 |
| ZBTB37      | 0.187965774 | 1.60E-05 | 4.79E-05 | 520 | 519 |
| RASL11B     | 0.187892595 | 1.61E-05 | 4.82E-05 | 520 | 519 |
| CDON        | 0.187866794 | 1.62E-05 | 4.84E-05 | 520 | 520 |
| VPS41       | 0.187854251 | 1.62E-05 | 4.84E-05 | 520 | 520 |
| SUMF2       | 0.187663776 | 1.65E-05 | 4.93E-05 | 520 | 520 |
| ACOT1       | 0.187662821 | 1.65E-05 | 4.93E-05 | 520 | 520 |
| NUDCD1      | 0.187607163 | 1.66E-05 | 4.96E-05 | 520 | 520 |
| ABHD15      | 0.18748354  | 1.68E-05 | 5.02E-05 | 520 | 520 |
| DENND4A     | 0.187413173 | 1.70E-05 | 5.06E-05 | 520 | 520 |
| SPTA1       | 0.187406431 | 1.70E-05 | 5.06E-05 | 520 | 397 |
| P2RX7       | 0.187379512 | 1.70E-05 | 5.07E-05 | 520 | 517 |
| C1orf127    | 0.187352034 | 1.71E-05 | 5.09E-05 | 520 | 471 |
| MDN1        | 0.18734778  | 1.71E-05 | 5.09E-05 | 520 | 520 |

|           |             |          |          |     |     |
|-----------|-------------|----------|----------|-----|-----|
| SERPINA3  | 0.187334188 | 1.71E-05 | 5.09E-05 | 520 | 520 |
| RASA1     | 0.187328242 | 1.71E-05 | 5.10E-05 | 520 | 520 |
| TCTN2     | 0.18726288  | 1.72E-05 | 5.13E-05 | 520 | 520 |
| ATOH8     | 0.187249752 | 1.73E-05 | 5.14E-05 | 520 | 520 |
| NME5      | 0.187240128 | 1.73E-05 | 5.14E-05 | 520 | 415 |
| C11orf45  | 0.187211617 | 1.73E-05 | 5.15E-05 | 520 | 520 |
| LOC150786 | 0.187206615 | 1.73E-05 | 5.16E-05 | 520 | 520 |
| ARRB1     | 0.187189525 | 1.74E-05 | 5.16E-05 | 520 | 520 |
| BBS2      | 0.187185445 | 1.74E-05 | 5.17E-05 | 520 | 520 |
| LOH12CR2  | 0.187123386 | 1.75E-05 | 5.20E-05 | 520 | 519 |
| GRM1      | 0.187095087 | 1.75E-05 | 5.21E-05 | 520 | 388 |
| CHIC1     | 0.187062102 | 1.76E-05 | 5.23E-05 | 520 | 520 |
| MGC4473   | 0.187055876 | 1.76E-05 | 5.23E-05 | 520 | 361 |
| MDC1      | 0.187025105 | 1.77E-05 | 5.25E-05 | 520 | 520 |
| AATK      | 0.187006643 | 1.77E-05 | 5.26E-05 | 520 | 520 |
| C14orf43  | 0.18695039  | 1.78E-05 | 5.29E-05 | 520 | 520 |
| CDC14A    | 0.186893322 | 1.79E-05 | 5.32E-05 | 520 | 519 |
| PLXNA3    | 0.186864875 | 1.80E-05 | 5.33E-05 | 520 | 520 |
| ACOT9     | 0.186778311 | 1.81E-05 | 5.38E-05 | 520 | 520 |
| TRHDE     | 0.186728576 | 1.82E-05 | 5.40E-05 | 520 | 423 |
| PKD1      | 0.186679242 | 1.83E-05 | 5.43E-05 | 520 | 520 |
| RGS1      | 0.186607604 | 1.85E-05 | 5.47E-05 | 520 | 520 |
| ZHX2      | 0.186596035 | 1.85E-05 | 5.47E-05 | 520 | 520 |
| DENND3    | 0.186565949 | 1.85E-05 | 5.49E-05 | 520 | 520 |
| TOB2      | 0.186547254 | 1.86E-05 | 5.50E-05 | 520 | 520 |
| ZNF280D   | 0.186509805 | 1.87E-05 | 5.52E-05 | 520 | 520 |
| ST3GAL3   | 0.186495832 | 1.87E-05 | 5.53E-05 | 520 | 520 |
| HYDIN     | 0.186483228 | 1.87E-05 | 5.53E-05 | 520 | 501 |
| NLGN1     | 0.186475815 | 1.87E-05 | 5.54E-05 | 520 | 450 |
| CSF2RB    | 0.186445814 | 1.88E-05 | 5.55E-05 | 520 | 520 |
| FAM19A1   | 0.186293488 | 1.91E-05 | 5.64E-05 | 520 | 283 |
| BTBD3     | 0.186255482 | 1.92E-05 | 5.66E-05 | 520 | 520 |
| KCNT1     | 0.186253787 | 1.92E-05 | 5.66E-05 | 520 | 414 |
| RASD1     | 0.186156395 | 1.94E-05 | 5.72E-05 | 520 | 520 |
| FTSJ1     | 0.186152167 | 1.94E-05 | 5.72E-05 | 520 | 520 |
| PLCB2     | 0.186123155 | 1.94E-05 | 5.73E-05 | 520 | 520 |
| STK3      | 0.186051755 | 1.96E-05 | 5.78E-05 | 520 | 520 |
| HOXC4     | 0.185948848 | 1.98E-05 | 5.83E-05 | 520 | 518 |
| PAPSS1    | 0.185875282 | 1.99E-05 | 5.88E-05 | 520 | 520 |
| LOC646982 | 0.185801363 | 2.01E-05 | 5.92E-05 | 520 | 395 |
| SBNO1     | 0.18576511  | 2.02E-05 | 5.94E-05 | 520 | 520 |
| ZBTB25    | 0.185764373 | 2.02E-05 | 5.94E-05 | 520 | 520 |
| LYZ       | 0.185762625 | 2.02E-05 | 5.94E-05 | 520 | 520 |
| LOC220930 | 0.185753545 | 2.02E-05 | 5.95E-05 | 520 | 520 |
| PLA1A     | 0.185740369 | 2.02E-05 | 5.96E-05 | 520 | 515 |
| GLI2      | 0.185739173 | 2.02E-05 | 5.96E-05 | 520 | 520 |

|              |             |          |          |     |     |
|--------------|-------------|----------|----------|-----|-----|
| NFIL3        | 0.185650398 | 2.04E-05 | 6.01E-05 | 520 | 520 |
| TM9SF3       | 0.185597488 | 2.05E-05 | 6.04E-05 | 520 | 520 |
| WDR17        | 0.185500084 | 2.07E-05 | 6.10E-05 | 520 | 428 |
| CD70         | 0.185498536 | 2.07E-05 | 6.10E-05 | 520 | 520 |
| CTSH         | 0.185450793 | 2.08E-05 | 6.13E-05 | 520 | 520 |
| DLL1         | 0.185377771 | 2.10E-05 | 6.17E-05 | 520 | 520 |
| NUP160       | 0.185371948 | 2.10E-05 | 6.17E-05 | 520 | 520 |
| RICTOR       | 0.185345328 | 2.11E-05 | 6.19E-05 | 520 | 520 |
| TMEM67       | 0.185304303 | 2.12E-05 | 6.22E-05 | 520 | 520 |
| ZNFX1        | 0.185287909 | 2.12E-05 | 6.22E-05 | 520 | 520 |
| HPSE2        | 0.185249499 | 2.13E-05 | 6.25E-05 | 520 | 270 |
| KIAA1107     | 0.18505953  | 2.17E-05 | 6.37E-05 | 520 | 519 |
| WDR7         | 0.184967482 | 2.19E-05 | 6.43E-05 | 520 | 520 |
| RHOA         | 0.184957346 | 2.19E-05 | 6.43E-05 | 520 | 520 |
| LOC729799    | 0.184762802 | 2.24E-05 | 6.56E-05 | 520 | 518 |
| TMEM150C     | 0.184707054 | 2.25E-05 | 6.59E-05 | 520 | 516 |
| HTR6         | 0.184609741 | 2.27E-05 | 6.66E-05 | 520 | 352 |
| CHID1        | 0.184600858 | 2.28E-05 | 6.66E-05 | 520 | 520 |
| LOC100271836 | 0.184565168 | 2.29E-05 | 6.69E-05 | 520 | 520 |
| COX4I2       | 0.184479825 | 2.31E-05 | 6.74E-05 | 520 | 520 |
| PCDHGA8      | 0.18446024  | 2.31E-05 | 6.76E-05 | 520 | 506 |
| SDF4         | 0.184398221 | 2.33E-05 | 6.80E-05 | 520 | 520 |
| GPER         | 0.184388782 | 2.33E-05 | 6.80E-05 | 520 | 520 |
| NAP1L5       | 0.184328724 | 2.34E-05 | 6.84E-05 | 520 | 520 |
| HAPLN3       | 0.184321616 | 2.34E-05 | 6.85E-05 | 520 | 520 |
| CLDN5        | 0.184223349 | 2.37E-05 | 6.91E-05 | 520 | 520 |
| ZNF98        | 0.18421087  | 2.37E-05 | 6.92E-05 | 520 | 357 |
| RPL23AP7     | 0.184199612 | 2.37E-05 | 6.93E-05 | 520 | 520 |
| ARHGEF9      | 0.184162484 | 2.38E-05 | 6.95E-05 | 520 | 520 |
| PPP1R12B     | 0.184148823 | 2.39E-05 | 6.96E-05 | 520 | 520 |
| DAPK3        | 0.184019815 | 2.42E-05 | 7.05E-05 | 520 | 520 |
| PTHLH        | 0.184017478 | 2.42E-05 | 7.05E-05 | 520 | 520 |
| CREB1        | 0.183939397 | 2.44E-05 | 7.11E-05 | 520 | 520 |
| PLCXD3       | 0.183841695 | 2.46E-05 | 7.18E-05 | 520 | 373 |
| LOC100272216 | 0.183806113 | 2.47E-05 | 7.20E-05 | 520 | 493 |
| EHD1         | 0.18371607  | 2.50E-05 | 7.26E-05 | 520 | 520 |
| C15orf52     | 0.183678767 | 2.51E-05 | 7.29E-05 | 520 | 520 |
| ELANE        | 0.183614027 | 2.52E-05 | 7.34E-05 | 520 | 266 |
| COG8         | 0.183516026 | 2.55E-05 | 7.41E-05 | 520 | 520 |
| MGC23270     | 0.183456456 | 2.56E-05 | 7.45E-05 | 520 | 519 |
| LOC100133991 | 0.183366708 | 2.59E-05 | 7.52E-05 | 520 | 517 |
| TMEM106B     | 0.183319875 | 2.60E-05 | 7.56E-05 | 520 | 520 |
| FSD2         | 0.183302952 | 2.60E-05 | 7.57E-05 | 520 | 295 |
| PPP4R4       | 0.183264409 | 2.61E-05 | 7.60E-05 | 520 | 517 |
| RNF139       | 0.183095602 | 2.66E-05 | 7.73E-05 | 520 | 520 |
| PAR-SN       | 0.183034914 | 2.68E-05 | 7.77E-05 | 520 | 512 |



|           |             |          |          |     |     |
|-----------|-------------|----------|----------|-----|-----|
| CGNL1     | 0.182999048 | 2.69E-05 | 7.80E-05 | 520 | 519 |
| HMG20A    | 0.182990709 | 2.69E-05 | 7.80E-05 | 520 | 520 |
| PDE6G     | 0.182870711 | 2.72E-05 | 7.89E-05 | 520 | 519 |
| MAGI2     | 0.182783825 | 2.75E-05 | 7.96E-05 | 520 | 520 |
| TXNDC2    | 0.182766342 | 2.75E-05 | 7.98E-05 | 520 | 488 |
| CCDC113   | 0.182668946 | 2.78E-05 | 8.05E-05 | 520 | 520 |
| C2CD3     | 0.182638979 | 2.79E-05 | 8.08E-05 | 520 | 520 |
| SLC24A1   | 0.182634627 | 2.79E-05 | 8.08E-05 | 520 | 520 |
| MYH15     | 0.182605413 | 2.80E-05 | 8.10E-05 | 520 | 500 |
| EFCAB2    | 0.182565326 | 2.81E-05 | 8.13E-05 | 520 | 520 |
| AQP11     | 0.182538342 | 2.82E-05 | 8.15E-05 | 520 | 513 |
| EPAS1     | 0.182512399 | 2.83E-05 | 8.17E-05 | 520 | 520 |
| GALNT1    | 0.18247607  | 2.84E-05 | 8.20E-05 | 520 | 520 |
| ZNF136    | 0.182468808 | 2.84E-05 | 8.21E-05 | 520 | 520 |
| SIGLEC8   | 0.182425803 | 2.85E-05 | 8.24E-05 | 520 | 505 |
| ZBED3     | 0.182414067 | 2.85E-05 | 8.25E-05 | 520 | 509 |
| B4GALT6   | 0.182401393 | 2.86E-05 | 8.26E-05 | 520 | 520 |
| SWAP70    | 0.182351931 | 2.87E-05 | 8.30E-05 | 520 | 520 |
| ZNF791    | 0.1823423   | 2.87E-05 | 8.31E-05 | 520 | 520 |
| TUBB3     | 0.182326703 | 2.88E-05 | 8.32E-05 | 520 | 520 |
| DPH3B     | 0.182269197 | 2.90E-05 | 8.36E-05 | 520 | 518 |
| PDE11A    | 0.182267775 | 2.90E-05 | 8.36E-05 | 520 | 427 |
| PACS2     | 0.182169648 | 2.93E-05 | 8.44E-05 | 520 | 520 |
| ZMYND11   | 0.182091869 | 2.95E-05 | 8.50E-05 | 520 | 520 |
| KIF16B    | 0.182035899 | 2.97E-05 | 8.55E-05 | 520 | 520 |
| RBM27     | 0.182005505 | 2.98E-05 | 8.57E-05 | 520 | 520 |
| XKR8      | 0.181993654 | 2.98E-05 | 8.58E-05 | 520 | 520 |
| ZNF430    | 0.181986562 | 2.98E-05 | 8.58E-05 | 520 | 519 |
| ITCH      | 0.181935757 | 3.00E-05 | 8.63E-05 | 520 | 520 |
| NXPH2     | 0.18193495  | 3.00E-05 | 8.63E-05 | 520 | 329 |
| PARVG     | 0.181931045 | 3.00E-05 | 8.63E-05 | 520 | 520 |
| C11orf87  | 0.18192064  | 3.00E-05 | 8.64E-05 | 520 | 407 |
| IFI30     | 0.181774419 | 3.05E-05 | 8.76E-05 | 520 | 520 |
| CHRFAM7A  | 0.181762023 | 3.05E-05 | 8.77E-05 | 520 | 517 |
| HUWE1     | 0.181685833 | 3.07E-05 | 8.83E-05 | 520 | 520 |
| MMP17     | 0.181673069 | 3.08E-05 | 8.84E-05 | 520 | 520 |
| PRAM1     | 0.18162619  | 3.09E-05 | 8.88E-05 | 520 | 519 |
| SH2D7     | 0.181602686 | 3.10E-05 | 8.90E-05 | 520 | 385 |
| PLA2G4C   | 0.181562903 | 3.11E-05 | 8.93E-05 | 520 | 520 |
| FBLIM1    | 0.181526439 | 3.13E-05 | 8.96E-05 | 520 | 520 |
| HOXB6     | 0.181489314 | 3.14E-05 | 8.99E-05 | 520 | 518 |
| ID4       | 0.181407707 | 3.16E-05 | 9.06E-05 | 520 | 520 |
| C22orf24  | 0.181360688 | 3.18E-05 | 9.11E-05 | 520 | 415 |
| HCN2      | 0.181351199 | 3.18E-05 | 9.11E-05 | 520 | 520 |
| LOC285548 | 0.181270978 | 3.21E-05 | 9.18E-05 | 520 | 475 |
| C16orf57  | 0.181256127 | 3.21E-05 | 9.20E-05 | 520 | 520 |

|           |             |          |            |     |     |
|-----------|-------------|----------|------------|-----|-----|
| CLC       | 0.18124146  | 3.22E-05 | 9.21E-05   | 520 | 286 |
| LOC389033 | 0.181182663 | 3.24E-05 | 9.26E-05   | 520 | 107 |
| FAM19A2   | 0.181174153 | 3.24E-05 | 9.27E-05   | 520 | 500 |
| ASB3      | 0.180949179 | 3.32E-05 | 9.47E-05   | 520 | 520 |
| CTNND2    | 0.180905984 | 3.33E-05 | 9.51E-05   | 520 | 405 |
| AFP       | 0.180903801 | 3.33E-05 | 9.51E-05   | 520 | 335 |
| WBP11P1   | 0.180895941 | 3.33E-05 | 9.52E-05   | 520 | 517 |
| MYL7      | 0.180881924 | 3.34E-05 | 9.53E-05   | 520 | 260 |
| ARHGEF12  | 0.180875465 | 3.34E-05 | 9.54E-05   | 520 | 520 |
| CYP4V2    | 0.18085274  | 3.35E-05 | 9.56E-05   | 520 | 520 |
| SMG6      | 0.180768363 | 3.38E-05 | 9.64E-05   | 520 | 520 |
| EXOC6B    | 0.180763334 | 3.38E-05 | 9.64E-05   | 520 | 520 |
| DDAH2     | 0.180696683 | 3.40E-05 | 9.70E-05   | 520 | 520 |
| CSF2RA    | 0.18066771  | 3.41E-05 | 9.73E-05   | 520 | 520 |
| RGS22     | 0.180620654 | 3.43E-05 | 9.77E-05   | 520 | 392 |
| P2RY13    | 0.180606537 | 3.43E-05 | 9.78E-05   | 520 | 517 |
| PRRG3     | 0.180581743 | 3.44E-05 | 9.80E-05   | 520 | 331 |
| ARID5B    | 0.180561541 | 3.45E-05 | 9.82E-05   | 520 | 520 |
| SHPRH     | 0.180553506 | 3.45E-05 | 9.83E-05   | 520 | 520 |
| COL4A6    | 0.180532012 | 3.46E-05 | 9.85E-05   | 520 | 519 |
| HCG18     | 0.180517085 | 3.46E-05 | 9.86E-05   | 520 | 520 |
| GPR107    | 0.180512359 | 3.47E-05 | 9.86E-05   | 520 | 520 |
| ASPA      | 0.180506986 | 3.47E-05 | 9.87E-05   | 520 | 430 |
| GPR20     | 0.180496608 | 3.47E-05 | 9.88E-05   | 520 | 426 |
| DUSP13    | 0.180491052 | 3.47E-05 | 9.88E-05   | 520 | 503 |
| CCDC144A  | 0.180487761 | 3.47E-05 | 9.88E-05   | 520 | 482 |
| KLHL24    | 0.180449131 | 3.49E-05 | 9.92E-05   | 520 | 520 |
| S100PBP   | 0.180420424 | 3.50E-05 | 9.94E-05   | 520 | 520 |
| C17orf76  | 0.18040377  | 3.50E-05 | 9.96E-05   | 520 | 518 |
| IL11RA    | 0.180403457 | 3.50E-05 | 9.96E-05   | 520 | 520 |
| PBX3      | 0.180344117 | 3.53E-05 | 0.0001001  | 520 | 520 |
| AADAT     | 0.180343922 | 3.53E-05 | 0.0001001  | 520 | 516 |
| FAM66C    | 0.180252339 | 3.56E-05 | 0.00010101 | 520 | 507 |
| LRRC41    | 0.180236533 | 3.56E-05 | 0.00010116 | 520 | 520 |
| FAM179B   | 0.180181425 | 3.58E-05 | 0.00010171 | 520 | 520 |
| PLA2R1    | 0.180169766 | 3.59E-05 | 0.00010182 | 520 | 520 |
| COL4A4    | 0.180130908 | 3.60E-05 | 0.00010219 | 520 | 517 |
| NIPSNAP3B | 0.180088535 | 3.62E-05 | 0.00010262 | 520 | 516 |
| SRPK3     | 0.180068256 | 3.63E-05 | 0.00010281 | 520 | 519 |
| CALB2     | 0.17998605  | 3.66E-05 | 0.00010366 | 520 | 519 |
| FANCF     | 0.179875067 | 3.70E-05 | 0.00010475 | 520 | 520 |
| CHD6      | 0.17984343  | 3.71E-05 | 0.00010507 | 520 | 520 |
| CBX1      | 0.17982794  | 3.72E-05 | 0.00010522 | 520 | 520 |
| CCNJL     | 0.179753973 | 3.74E-05 | 0.00010598 | 520 | 520 |
| EPB41L3   | 0.179741933 | 3.75E-05 | 0.00010608 | 520 | 520 |
| C21orf84  | 0.179654926 | 3.78E-05 | 0.00010697 | 520 | 346 |

|           |             |          |            |     |     |
|-----------|-------------|----------|------------|-----|-----|
| ANKRD2    | 0.179637857 | 3.79E-05 | 0.00010714 | 520 | 519 |
| 1-Dec     | 0.179616504 | 3.80E-05 | 0.00010736 | 520 | 370 |
| KLHL31    | 0.179576374 | 3.81E-05 | 0.00010776 | 520 | 519 |
| ZFP91     | 0.179540918 | 3.82E-05 | 0.00010809 | 520 | 520 |
| C16orf46  | 0.179354817 | 3.90E-05 | 0.00011002 | 520 | 520 |
| FRYL      | 0.179334417 | 3.91E-05 | 0.00011023 | 520 | 520 |
| TMX3      | 0.179235006 | 3.94E-05 | 0.00011133 | 520 | 520 |
| MYBL1     | 0.179170172 | 3.97E-05 | 0.00011204 | 520 | 520 |
| ZNF667    | 0.179068235 | 4.01E-05 | 0.00011317 | 520 | 511 |
| FLJ90757  | 0.178994821 | 4.04E-05 | 0.00011395 | 520 | 520 |
| EXTL3     | 0.178985624 | 4.05E-05 | 0.00011404 | 520 | 520 |
| C10orf18  | 0.178914741 | 4.07E-05 | 0.00011484 | 520 | 520 |
| UBR3      | 0.178900461 | 4.08E-05 | 0.00011499 | 520 | 520 |
| LRRC4B    | 0.17887188  | 4.09E-05 | 0.00011529 | 520 | 520 |
| TNXB      | 0.178835272 | 4.11E-05 | 0.00011568 | 520 | 520 |
| SYS1      | 0.178825735 | 4.11E-05 | 0.00011578 | 520 | 520 |
| POLR3D    | 0.178814564 | 4.12E-05 | 0.00011589 | 520 | 520 |
| B3GNT7    | 0.178788153 | 4.13E-05 | 0.00011617 | 520 | 520 |
| ZNF746    | 0.17876201  | 4.14E-05 | 0.00011646 | 520 | 520 |
| C5orf24   | 0.178605557 | 4.20E-05 | 0.00011816 | 520 | 520 |
| NCALD     | 0.178588386 | 4.21E-05 | 0.00011835 | 520 | 520 |
| GIMAP2    | 0.178579437 | 4.21E-05 | 0.00011844 | 520 | 520 |
| BBS10     | 0.178553171 | 4.23E-05 | 0.00011872 | 520 | 520 |
| LOC285419 | 0.178533749 | 4.23E-05 | 0.00011893 | 520 | 448 |
| AMBRA1    | 0.178507175 | 4.25E-05 | 0.00011923 | 520 | 520 |
| TRIP11    | 0.178497968 | 4.25E-05 | 0.00011933 | 520 | 520 |
| NAP1L2    | 0.178495134 | 4.25E-05 | 0.00011935 | 520 | 510 |
| ZNF471    | 0.178470284 | 4.26E-05 | 0.00011961 | 520 | 509 |
| RGS17     | 0.178459861 | 4.27E-05 | 0.00011969 | 520 | 508 |
| CCDC127   | 0.178397614 | 4.29E-05 | 0.00012042 | 520 | 520 |
| GALR1     | 0.178355118 | 4.31E-05 | 0.0001209  | 520 | 193 |
| FICD      | 0.178260475 | 4.35E-05 | 0.00012202 | 520 | 520 |
| CLEC4E    | 0.178210055 | 4.37E-05 | 0.00012261 | 520 | 519 |
| DAZL      | 0.178130473 | 4.41E-05 | 0.00012357 | 520 | 300 |
| TNPO3     | 0.17811304  | 4.42E-05 | 0.00012376 | 520 | 520 |
| NECAP1    | 0.178031483 | 4.45E-05 | 0.00012474 | 520 | 520 |
| KIAA0100  | 0.178022558 | 4.46E-05 | 0.00012483 | 520 | 520 |
| P2RX4     | 0.177970243 | 4.48E-05 | 0.00012546 | 520 | 520 |
| PHF12     | 0.177963296 | 4.48E-05 | 0.00012553 | 520 | 520 |
| ATP10D    | 0.177908026 | 4.51E-05 | 0.00012619 | 520 | 520 |
| NOD1      | 0.177889421 | 4.52E-05 | 0.00012641 | 520 | 520 |
| MPZ       | 0.177761327 | 4.58E-05 | 0.00012799 | 520 | 518 |
| ZZEF1     | 0.177693692 | 4.61E-05 | 0.00012884 | 520 | 520 |
| MT1M      | 0.177680227 | 4.61E-05 | 0.00012899 | 520 | 520 |
| GRAP      | 0.177624612 | 4.64E-05 | 0.00012968 | 520 | 520 |
| FAS       | 0.177622772 | 4.64E-05 | 0.00012968 | 520 | 520 |

|           |             |          |            |     |     |
|-----------|-------------|----------|------------|-----|-----|
| ATP7A     | 0.177621269 | 4.64E-05 | 0.00012969 | 520 | 520 |
| GPR17     | 0.177532964 | 4.68E-05 | 0.0001308  | 520 | 451 |
| ROBO3     | 0.177478968 | 4.71E-05 | 0.00013147 | 520 | 520 |
| TMEM215   | 0.177398712 | 4.74E-05 | 0.00013249 | 520 | 280 |
| CPA3      | 0.177369517 | 4.76E-05 | 0.00013281 | 520 | 520 |
| BAI1      | 0.177351282 | 4.77E-05 | 0.00013301 | 520 | 518 |
| SCAMP1    | 0.177338882 | 4.77E-05 | 0.00013316 | 520 | 520 |
| ZNF615    | 0.177333585 | 4.78E-05 | 0.00013319 | 520 | 519 |
| GRM8      | 0.177278487 | 4.80E-05 | 0.00013387 | 520 | 502 |
| CASP12    | 0.177264246 | 4.81E-05 | 0.00013405 | 520 | 353 |
| PSEN2     | 0.177258163 | 4.81E-05 | 0.00013409 | 520 | 520 |
| PIBF1     | 0.177203294 | 4.84E-05 | 0.00013479 | 520 | 520 |
| TNFRSF4   | 0.177170691 | 4.85E-05 | 0.00013519 | 520 | 520 |
| MTMR9     | 0.177141526 | 4.87E-05 | 0.00013557 | 520 | 520 |
| CCL24     | 0.177133088 | 4.87E-05 | 0.00013566 | 520 | 475 |
| SON       | 0.17706068  | 4.91E-05 | 0.00013663 | 520 | 520 |
| ENO2      | 0.177046264 | 4.91E-05 | 0.00013681 | 520 | 520 |
| LRRC43    | 0.177007763 | 4.93E-05 | 0.00013731 | 520 | 481 |
| OTUD7B    | 0.176987586 | 4.94E-05 | 0.00013757 | 520 | 520 |
| ZNF829    | 0.176966008 | 4.95E-05 | 0.00013785 | 520 | 481 |
| C6orf208  | 0.176951331 | 4.96E-05 | 0.00013803 | 520 | 395 |
| PRPS1     | 0.176898891 | 4.99E-05 | 0.00013866 | 520 | 520 |
| BBS1      | 0.176753803 | 5.06E-05 | 0.00014064 | 520 | 520 |
| ZSCAN21   | 0.176669688 | 5.10E-05 | 0.0001418  | 520 | 520 |
| EMID2     | 0.176605605 | 5.13E-05 | 0.00014263 | 520 | 514 |
| PADI4     | 0.176593114 | 5.14E-05 | 0.00014279 | 520 | 490 |
| PYGB      | 0.176588064 | 5.14E-05 | 0.00014284 | 520 | 520 |
| SPTY2D1   | 0.176454208 | 5.21E-05 | 0.00014468 | 520 | 520 |
| WHAMML1   | 0.176429909 | 5.23E-05 | 0.00014501 | 520 | 519 |
| LOC646214 | 0.176415345 | 5.23E-05 | 0.00014519 | 520 | 520 |
| LRRC37B2  | 0.176404244 | 5.24E-05 | 0.00014532 | 520 | 520 |
| VAV2      | 0.176393733 | 5.24E-05 | 0.00014545 | 520 | 520 |
| C11orf30  | 0.176364256 | 5.26E-05 | 0.00014586 | 520 | 520 |
| TAF6      | 0.176351618 | 5.27E-05 | 0.00014602 | 520 | 520 |
| THSD1     | 0.176337917 | 5.27E-05 | 0.0001462  | 520 | 520 |
| ART3      | 0.176282387 | 5.30E-05 | 0.00014697 | 520 | 476 |
| NKX1-2    | 0.176268965 | 5.31E-05 | 0.00014714 | 520 | 384 |
| LOC283856 | 0.176244374 | 5.32E-05 | 0.00014748 | 520 | 242 |
| KIAA0564  | 0.176221096 | 5.33E-05 | 0.00014778 | 520 | 520 |
| ZNF587    | 0.176078767 | 5.41E-05 | 0.00014977 | 520 | 520 |
| SORBS3    | 0.176078294 | 5.41E-05 | 0.00014977 | 520 | 520 |
| HIF1A     | 0.176071647 | 5.41E-05 | 0.00014983 | 520 | 520 |
| CHD3      | 0.176071253 | 5.41E-05 | 0.00014983 | 520 | 520 |
| ARID1B    | 0.176060093 | 5.42E-05 | 0.00014996 | 520 | 520 |
| GORASP2   | 0.17605433  | 5.42E-05 | 0.00015002 | 520 | 520 |
| ERCC4     | 0.176019277 | 5.44E-05 | 0.00015051 | 520 | 520 |

|                    |             |          |            |     |     |
|--------------------|-------------|----------|------------|-----|-----|
| GPR3               | 0.175992861 | 5.46E-05 | 0.00015086 | 520 | 520 |
| ZFYVE1             | 0.175880251 | 5.52E-05 | 0.00015249 | 520 | 520 |
| GPATCH8            | 0.175860253 | 5.53E-05 | 0.00015275 | 520 | 520 |
| MYBBP1A            | 0.175850709 | 5.53E-05 | 0.00015285 | 520 | 520 |
| FAM92A1            | 0.175844415 | 5.54E-05 | 0.00015293 | 520 | 520 |
| IDUA               | 0.175820911 | 5.55E-05 | 0.00015326 | 520 | 520 |
| FZD6               | 0.175817086 | 5.55E-05 | 0.0001533  | 520 | 520 |
| NHLRC2             | 0.175726817 | 5.60E-05 | 0.00015466 | 520 | 519 |
| ANAPC1             | 0.175705388 | 5.61E-05 | 0.00015497 | 520 | 520 |
| TMEM189-<br>UBE2V1 | 0.175697245 | 5.62E-05 | 0.00015507 | 520 | 396 |
| HLA-DOA            | 0.175690203 | 5.62E-05 | 0.00015516 | 520 | 520 |
| POLI               | 0.175679375 | 5.63E-05 | 0.00015528 | 520 | 520 |
| ZNF81              | 0.175646528 | 5.65E-05 | 0.00015572 | 520 | 520 |
| HERPUD2            | 0.1756319   | 5.66E-05 | 0.00015593 | 520 | 520 |
| LAPTM4A            | 0.175622542 | 5.66E-05 | 0.00015605 | 520 | 520 |
| OAT                | 0.175458755 | 5.75E-05 | 0.00015849 | 520 | 520 |
| NOMO2              | 0.175399452 | 5.79E-05 | 0.0001594  | 520 | 520 |
| ZSWIM4             | 0.175349274 | 5.82E-05 | 0.00016013 | 520 | 520 |
| USO1               | 0.175295426 | 5.85E-05 | 0.00016092 | 520 | 520 |
| ATP8A1             | 0.175290623 | 5.85E-05 | 0.00016097 | 520 | 520 |
| C11orf84           | 0.175253649 | 5.87E-05 | 0.00016152 | 520 | 520 |
| LRRC36             | 0.175227154 | 5.89E-05 | 0.00016192 | 520 | 451 |
| SPATS1             | 0.175181636 | 5.91E-05 | 0.0001626  | 520 | 368 |
| LOC645166          | 0.175174521 | 5.92E-05 | 0.0001627  | 520 | 520 |
| SIGLEC6            | 0.175094168 | 5.96E-05 | 0.00016397 | 520 | 462 |
| CLEC4G             | 0.175090051 | 5.97E-05 | 0.00016401 | 520 | 493 |
| FBP1               | 0.175036345 | 6.00E-05 | 0.00016482 | 520 | 520 |
| KIF3A              | 0.174971372 | 6.04E-05 | 0.00016586 | 520 | 520 |
| ZNF506             | 0.174920377 | 6.07E-05 | 0.00016667 | 520 | 520 |
| SHISA3             | 0.174911616 | 6.07E-05 | 0.00016679 | 520 | 329 |
| YIPF6              | 0.174712927 | 6.19E-05 | 0.00017002 | 520 | 520 |
| CLEC18C            | 0.174702966 | 6.20E-05 | 0.00017016 | 520 | 377 |
| CGA                | 0.174643783 | 6.24E-05 | 0.00017109 | 520 | 221 |
| GRIA1              | 0.174614939 | 6.25E-05 | 0.00017155 | 520 | 365 |
| ZNF223             | 0.174597395 | 6.26E-05 | 0.00017182 | 520 | 517 |
| TTBK1              | 0.174553669 | 6.29E-05 | 0.00017254 | 520 | 514 |
| DHX57              | 0.174502398 | 6.32E-05 | 0.00017337 | 520 | 520 |
| SPTAN1             | 0.174454778 | 6.35E-05 | 0.00017416 | 520 | 520 |
| LMX1B              | 0.174430092 | 6.37E-05 | 0.00017456 | 520 | 508 |
| LOC116437          | 0.17436818  | 6.41E-05 | 0.00017553 | 520 | 226 |
| INHBE              | 0.174313211 | 6.44E-05 | 0.00017641 | 520 | 514 |
| RAB3GAP1           | 0.174282809 | 6.46E-05 | 0.00017691 | 520 | 520 |
| ZNF124             | 0.174214011 | 6.50E-05 | 0.00017804 | 520 | 518 |
| RFPL2              | 0.174209782 | 6.51E-05 | 0.00017809 | 520 | 382 |
| RPGR               | 0.174111004 | 6.57E-05 | 0.00017968 | 520 | 520 |

|          |             |          |            |     |     |
|----------|-------------|----------|------------|-----|-----|
| FAM46A   | 0.174091601 | 6.58E-05 | 0.00018    | 520 | 520 |
| SPN      | 0.174085432 | 6.59E-05 | 0.00018008 | 520 | 520 |
| F8       | 0.173965029 | 6.67E-05 | 0.0001821  | 520 | 520 |
| PCOLCE2  | 0.173944942 | 6.68E-05 | 0.00018243 | 520 | 513 |
| MAFA     | 0.173928238 | 6.69E-05 | 0.00018271 | 520 | 428 |
| SNRNP200 | 0.173926346 | 6.69E-05 | 0.00018272 | 520 | 520 |
| HIBADH   | 0.17391311  | 6.70E-05 | 0.00018293 | 520 | 520 |
| PIP5K1A  | 0.173856593 | 6.74E-05 | 0.0001839  | 520 | 520 |
| ITFG2    | 0.173796929 | 6.78E-05 | 0.0001849  | 520 | 520 |
| UBE2H    | 0.173743497 | 6.81E-05 | 0.00018584 | 520 | 520 |
| PUM1     | 0.173738581 | 6.82E-05 | 0.00018591 | 520 | 520 |
| ZNF146   | 0.173691184 | 6.85E-05 | 0.0001867  | 520 | 520 |
| TMCC1    | 0.173539025 | 6.95E-05 | 0.0001893  | 520 | 520 |
| GYLTL1B  | 0.173502122 | 6.97E-05 | 0.00018996 | 520 | 520 |
| PCDHB13  | 0.173474771 | 6.99E-05 | 0.00019044 | 520 | 520 |
| RQCD1    | 0.173441317 | 7.02E-05 | 0.00019099 | 520 | 520 |
| PDE8B    | 0.173402154 | 7.04E-05 | 0.00019167 | 520 | 519 |
| CD1B     | 0.173355444 | 7.08E-05 | 0.00019252 | 520 | 495 |
| VKORC1L1 | 0.173336569 | 7.09E-05 | 0.00019283 | 520 | 520 |
| GIMAP5   | 0.173299303 | 7.11E-05 | 0.0001935  | 520 | 520 |
| ZNRF3    | 0.173288181 | 7.12E-05 | 0.00019368 | 520 | 520 |
| AMOT     | 0.173210181 | 7.18E-05 | 0.00019509 | 520 | 520 |
| CCL3     | 0.172998453 | 7.33E-05 | 0.00019907 | 520 | 520 |
| CACNG7   | 0.172997716 | 7.33E-05 | 0.00019907 | 520 | 193 |
| SCFD2    | 0.172966354 | 7.35E-05 | 0.00019962 | 520 | 520 |
| HS3ST3A1 | 0.172942938 | 7.37E-05 | 0.00020005 | 520 | 520 |
| SPANXB2  | 0.17290969  | 7.39E-05 | 0.00020068 | 520 | 212 |
| TTC8     | 0.172903532 | 7.39E-05 | 0.00020077 | 520 | 520 |
| GRAPL    | 0.172872778 | 7.42E-05 | 0.00020132 | 520 | 444 |
| MCF2     | 0.172849715 | 7.43E-05 | 0.00020169 | 520 | 428 |
| TMEM114  | 0.172796481 | 7.47E-05 | 0.00020269 | 520 | 201 |
| TNFRSF21 | 0.172767083 | 7.49E-05 | 0.00020316 | 520 | 520 |
| NBN      | 0.172719731 | 7.53E-05 | 0.00020402 | 520 | 520 |
| ZNF772   | 0.172582366 | 7.63E-05 | 0.00020662 | 520 | 520 |
| TMEM188  | 0.172515678 | 7.68E-05 | 0.00020791 | 520 | 520 |
| ITPRIPL1 | 0.172411198 | 7.76E-05 | 0.00020987 | 520 | 518 |
| SLC4A2   | 0.172387603 | 7.78E-05 | 0.00021032 | 520 | 520 |
| PPTC7    | 0.172347857 | 7.81E-05 | 0.00021111 | 520 | 520 |
| ADCY9    | 0.172337593 | 7.81E-05 | 0.00021129 | 520 | 520 |
| C3orf32  | 0.172249806 | 7.88E-05 | 0.00021302 | 520 | 507 |
| TPK1     | 0.172165903 | 7.95E-05 | 0.00021462 | 520 | 520 |
| BRWD3    | 0.17213978  | 7.97E-05 | 0.0002151  | 520 | 520 |
| KCNA5    | 0.172124431 | 7.98E-05 | 0.0002154  | 520 | 453 |
| ZNF217   | 0.172097556 | 8.00E-05 | 0.00021587 | 520 | 520 |
| EDN1     | 0.172024462 | 8.06E-05 | 0.00021732 | 520 | 520 |
| IGF2BP2  | 0.171904412 | 8.15E-05 | 0.00021978 | 520 | 520 |

|          |             |          |            |     |     |
|----------|-------------|----------|------------|-----|-----|
| LRRC30   | 0.171897458 | 8.16E-05 | 0.0002199  | 520 | 134 |
| ZDHHC4   | 0.171790758 | 8.24E-05 | 0.00022204 | 520 | 520 |
| ZNF254   | 0.171757373 | 8.27E-05 | 0.0002227  | 520 | 520 |
| VPS11    | 0.171674598 | 8.33E-05 | 0.00022437 | 520 | 520 |
| PPFIA1   | 0.171607228 | 8.39E-05 | 0.00022578 | 520 | 520 |
| ARFGAP1  | 0.171532304 | 8.45E-05 | 0.00022724 | 520 | 520 |
| MPV17    | 0.171460539 | 8.51E-05 | 0.00022876 | 520 | 520 |
| KIF1B    | 0.171328248 | 8.62E-05 | 0.00023149 | 520 | 520 |
| C6orf176 | 0.17130748  | 8.63E-05 | 0.00023193 | 520 | 405 |
| C14orf4  | 0.171296021 | 8.64E-05 | 0.00023215 | 520 | 520 |
| C11orf68 | 0.171294052 | 8.65E-05 | 0.00023216 | 520 | 520 |
| KCNA3    | 0.171274809 | 8.66E-05 | 0.00023253 | 520 | 503 |
| GPC5     | 0.171265367 | 8.67E-05 | 0.00023272 | 520 | 316 |
| ZNF570   | 0.171234136 | 8.70E-05 | 0.00023339 | 520 | 517 |
| TMEM132C | 0.171198076 | 8.73E-05 | 0.00023417 | 520 | 394 |
| SHOC2    | 0.171168479 | 8.75E-05 | 0.00023475 | 520 | 520 |
| SELE     | 0.171112783 | 8.80E-05 | 0.00023589 | 520 | 520 |
| ACRBP    | 0.171109329 | 8.80E-05 | 0.00023594 | 520 | 519 |
| GLB1L    | 0.171081575 | 8.83E-05 | 0.00023651 | 520 | 520 |
| ADAR     | 0.170993074 | 8.90E-05 | 0.00023847 | 520 | 520 |
| C17orf63 | 0.170991537 | 8.90E-05 | 0.00023848 | 520 | 520 |
| IGF2BP1  | 0.17098602  | 8.91E-05 | 0.00023857 | 520 | 506 |
| NAGLU    | 0.170980609 | 8.91E-05 | 0.00023866 | 520 | 520 |
| GON4L    | 0.170933019 | 8.95E-05 | 0.0002397  | 520 | 520 |
| C5orf36  | 0.170871793 | 9.01E-05 | 0.00024103 | 520 | 519 |
| RTL1     | 0.170871535 | 9.01E-05 | 0.00024103 | 520 | 232 |
| KIAA1430 | 0.170704544 | 9.15E-05 | 0.00024471 | 520 | 520 |
| FAM125B  | 0.170667906 | 9.18E-05 | 0.00024548 | 520 | 520 |
| IQCE     | 0.170617189 | 9.23E-05 | 0.00024662 | 520 | 520 |
| KIAA1919 | 0.170573253 | 9.27E-05 | 0.0002476  | 520 | 520 |
| ZNF649   | 0.170541269 | 9.30E-05 | 0.00024823 | 520 | 520 |
| NPAS2    | 0.170541059 | 9.30E-05 | 0.00024823 | 520 | 520 |
| HOXC13   | 0.170521873 | 9.31E-05 | 0.00024862 | 520 | 509 |
| TBL2     | 0.170483586 | 9.35E-05 | 0.00024948 | 520 | 520 |
| KBTBD12  | 0.170440366 | 9.39E-05 | 0.00025045 | 520 | 423 |
| RGL3     | 0.170249673 | 9.56E-05 | 0.00025489 | 520 | 512 |
| CGB2     | 0.170176496 | 9.63E-05 | 0.00025654 | 520 | 446 |
| FLRT3    | 0.170175253 | 9.63E-05 | 0.00025654 | 520 | 519 |
| NR1H3    | 0.170138806 | 9.66E-05 | 0.00025737 | 520 | 520 |
| ANO7     | 0.170065945 | 9.73E-05 | 0.00025911 | 520 | 520 |
| CAV2     | 0.170053295 | 9.74E-05 | 0.00025939 | 520 | 520 |
| TREML4   | 0.170047172 | 9.75E-05 | 0.00025951 | 520 | 290 |
| COL4A5   | 0.170002328 | 9.79E-05 | 0.00026056 | 520 | 520 |
| GLDN     | 0.169996193 | 9.80E-05 | 0.00026064 | 520 | 519 |
| B3GALTL  | 0.169879626 | 9.91E-05 | 0.00026337 | 520 | 520 |
| C6orf170 | 0.169873809 | 9.91E-05 | 0.00026348 | 520 | 520 |

|           |             |             |            |     |     |
|-----------|-------------|-------------|------------|-----|-----|
| IGSF10    | 0.169857773 | 9.93E-05    | 0.00026385 | 520 | 517 |
| C1orf105  | 0.169854119 | 9.93E-05    | 0.00026391 | 520 | 256 |
| ZNF528    | 0.169790804 | 9.99E-05    | 0.00026541 | 520 | 520 |
| SOCS3     | 0.169726732 | 0.000100532 | 0.00026697 | 520 | 520 |
| SNX7      | 0.169678014 | 0.000101002 | 0.00026812 | 520 | 520 |
| MTMR3     | 0.169674418 | 0.000101037 | 0.00026817 | 520 | 520 |
| RPL23AP82 | 0.169640982 | 0.000101361 | 0.00026893 | 520 | 520 |
| CA8       | 0.169624874 | 0.000101518 | 0.00026931 | 520 | 478 |
| RHOC      | 0.169593953 | 0.000101819 | 0.00027007 | 520 | 520 |
| PREP      | 0.169507527 | 0.000102664 | 0.00027217 | 520 | 520 |
| GBAS      | 0.169407697 | 0.000103649 | 0.00027456 | 520 | 520 |
| MEIS2     | 0.169379131 | 0.000103933 | 0.00027528 | 520 | 520 |
| OPN4      | 0.169351295 | 0.00010421  | 0.00027598 | 520 | 405 |
| COL11A2   | 0.169276313 | 0.000104959 | 0.00027785 | 520 | 520 |
| AMFR      | 0.169116791 | 0.000106571 | 0.00028193 | 520 | 520 |
| C6orf155  | 0.168991375 | 0.000107854 | 0.00028522 | 520 | 448 |
| GATA3     | 0.168930715 | 0.00010848  | 0.00028683 | 520 | 520 |
| CLOCK     | 0.168926157 | 0.000108528 | 0.00028692 | 520 | 520 |
| ENPP4     | 0.168825492 | 0.000109574 | 0.0002895  | 520 | 519 |
| PNPLA6    | 0.168798349 | 0.000109858 | 0.00029017 | 520 | 520 |
| BMX       | 0.168783726 | 0.000110011 | 0.00029054 | 520 | 515 |
| MEST      | 0.168708589 | 0.000110802 | 0.00029247 | 520 | 520 |
| PDZK1     | 0.168694427 | 0.000110951 | 0.00029283 | 520 | 515 |
| LOC283050 | 0.168655569 | 0.000111363 | 0.00029372 | 520 | 520 |
| MUC12     | 0.168614633 | 0.000111798 | 0.00029483 | 520 | 515 |
| ARMC1     | 0.168575312 | 0.000112217 | 0.0002959  | 520 | 520 |
| CBLN3     | 0.168528416 | 0.000112719 | 0.00029707 | 520 | 519 |
| C1orf133  | 0.168512026 | 0.000112895 | 0.00029749 | 520 | 519 |
| RABGAP1L  | 0.168476913 | 0.000113273 | 0.00029845 | 520 | 520 |
| FAM5B     | 0.168460685 | 0.000113448 | 0.0002988  | 520 | 296 |
| FLCN      | 0.168433146 | 0.000113745 | 0.00029954 | 520 | 520 |
| MED17     | 0.168366334 | 0.00011447  | 0.00030133 | 520 | 520 |
| RNF128    | 0.168338166 | 0.000114777 | 0.00030206 | 520 | 519 |
| EXD2      | 0.168317798 | 0.000114999 | 0.0003026  | 520 | 520 |
| TAC1      | 0.168316124 | 0.000115018 | 0.00030261 | 520 | 145 |
| KIAA1467  | 0.168312989 | 0.000115052 | 0.00030266 | 520 | 520 |
| AGAP1     | 0.168252214 | 0.000115718 | 0.00030434 | 520 | 520 |
| WDR82     | 0.168226108 | 0.000116006 | 0.00030497 | 520 | 520 |
| GPR120    | 0.168174054 | 0.000116581 | 0.00030632 | 520 | 445 |
| HOMER1    | 0.16814662  | 0.000116885 | 0.00030708 | 520 | 520 |
| ASPHD1    | 0.168132531 | 0.000117041 | 0.00030745 | 520 | 519 |
| AZI2      | 0.168112944 | 0.000117259 | 0.00030795 | 520 | 520 |
| MICB      | 0.168079489 | 0.000117632 | 0.00030881 | 520 | 520 |
| RFX2      | 0.168038146 | 0.000118095 | 0.00030994 | 520 | 520 |
| DSCAM     | 0.167924155 | 0.000119379 | 0.00031311 | 520 | 454 |
| C1orf94   | 0.167924089 | 0.00011938  | 0.00031311 | 520 | 234 |



|              |             |             |            |     |     |
|--------------|-------------|-------------|------------|-----|-----|
| TSSK1B       | 0.167774498 | 0.000121084 | 0.00031746 | 520 | 491 |
| SLFN5        | 0.167712196 | 0.000121801 | 0.00031918 | 520 | 520 |
| FYCO1        | 0.167711736 | 0.000121807 | 0.00031918 | 520 | 520 |
| ARNT2        | 0.167681275 | 0.000122159 | 0.00032002 | 520 | 520 |
| IL32         | 0.167557073 | 0.000123603 | 0.00032355 | 520 | 520 |
| NCOA3        | 0.167522465 | 0.000124009 | 0.00032457 | 520 | 520 |
| ZNF556       | 0.167318328 | 0.000126426 | 0.00033069 | 520 | 483 |
| RIMBP2       | 0.16728419  | 0.000126835 | 0.00033167 | 520 | 518 |
| HTRA4        | 0.167277485 | 0.000126915 | 0.00033184 | 520 | 484 |
| ASCC3        | 0.16723649  | 0.000127407 | 0.00033299 | 520 | 520 |
| PUS7L        | 0.167210517 | 0.00012772  | 0.00033377 | 520 | 520 |
| ROPN1        | 0.167199651 | 0.000127852 | 0.00033407 | 520 | 403 |
| LST1         | 0.16713715  | 0.000128608 | 0.000336   | 520 | 520 |
| FST          | 0.167119423 | 0.000128824 | 0.00033652 | 520 | 520 |
| MTOR         | 0.167105312 | 0.000128996 | 0.00033693 | 520 | 520 |
| P2RY10       | 0.167088945 | 0.000129195 | 0.0003374  | 520 | 516 |
| TEKT3        | 0.167053877 | 0.000129623 | 0.00033848 | 520 | 431 |
| GATAD2B      | 0.167052366 | 0.000129642 | 0.00033848 | 520 | 520 |
| HSF2BP       | 0.166907381 | 0.000131427 | 0.00034297 | 520 | 520 |
| SIRT1        | 0.166875642 | 0.000131821 | 0.0003439  | 520 | 520 |
| C1orf150     | 0.166853246 | 0.000132099 | 0.00034454 | 520 | 432 |
| ARID4B       | 0.166827215 | 0.000132424 | 0.00034534 | 520 | 520 |
| CRMP1        | 0.16680971  | 0.000132643 | 0.00034587 | 520 | 520 |
| EML4         | 0.16673235  | 0.000133613 | 0.00034822 | 520 | 520 |
| NUPL1        | 0.166697967 | 0.000134046 | 0.0003493  | 520 | 520 |
| IL2RB        | 0.16660464  | 0.000135229 | 0.00035216 | 520 | 520 |
| INPP5A       | 0.166599607 | 0.000135293 | 0.00035228 | 520 | 520 |
| TRIM6        | 0.16658975  | 0.000135419 | 0.00035256 | 520 | 519 |
| GRIK1        | 0.166524413 | 0.000136254 | 0.00035446 | 520 | 414 |
| RXRG         | 0.166454219 | 0.000137157 | 0.00035663 | 520 | 469 |
| KILLIN       | 0.166342728 | 0.000138602 | 0.00036017 | 520 | 519 |
| TNFSF15      | 0.166326716 | 0.000138811 | 0.0003606  | 520 | 507 |
| RAB15        | 0.166304736 | 0.000139098 | 0.0003613  | 520 | 520 |
| GPR132       | 0.166226687 | 0.000140121 | 0.00036382 | 520 | 520 |
| NBPF3        | 0.166204182 | 0.000140418 | 0.00036445 | 520 | 519 |
| SPATA7       | 0.165991561 | 0.000143248 | 0.00037141 | 520 | 520 |
| KLF2         | 0.165984459 | 0.000143344 | 0.00037161 | 520 | 520 |
| ITGA6        | 0.165936588 | 0.000143989 | 0.00037319 | 520 | 520 |
| ADO          | 0.165898413 | 0.000144505 | 0.00037448 | 520 | 520 |
| CACNB3       | 0.165861422 | 0.000145007 | 0.00037573 | 520 | 520 |
| MAML3        | 0.165835858 | 0.000145355 | 0.00037658 | 520 | 520 |
| LOC100216001 | 0.165783823 | 0.000146065 | 0.00037837 | 520 | 511 |
| ZNF187       | 0.16573207  | 0.000146775 | 0.00038011 | 520 | 520 |
| DNAJB9       | 0.165730483 | 0.000146797 | 0.00038012 | 520 | 520 |
| CCDC81       | 0.165632033 | 0.000148156 | 0.0003834  | 520 | 519 |
| MEG8         | 0.165614994 | 0.000148393 | 0.00038396 | 520 | 95  |

|                |             |             |            |     |     |
|----------------|-------------|-------------|------------|-----|-----|
| TBX5           | 0.165599674 | 0.000148606 | 0.00038446 | 520 | 347 |
| RNF123         | 0.165595355 | 0.000148666 | 0.00038457 | 520 | 520 |
| CHRNE          | 0.165539346 | 0.000149447 | 0.00038649 | 520 | 518 |
| DPAGT1         | 0.165376699 | 0.000151737 | 0.00039216 | 520 | 520 |
| XPC            | 0.165284547 | 0.00015305  | 0.00039545 | 520 | 520 |
| PI4KAP2        | 0.165175595 | 0.000154615 | 0.00039919 | 520 | 518 |
| EPS15          | 0.165120351 | 0.000155414 | 0.0004011  | 520 | 520 |
| TUBB           | 0.1650949   | 0.000155784 | 0.00040195 | 520 | 520 |
| SLC5A9         | 0.165065157 | 0.000156217 | 0.00040301 | 520 | 467 |
| PRNP           | 0.16500481  | 0.000157099 | 0.00040518 | 520 | 520 |
| RASA2          | 0.164990359 | 0.00015731  | 0.00040563 | 520 | 519 |
| LOC647979      | 0.164937891 | 0.000158082 | 0.00040756 | 520 | 520 |
| ST18           | 0.164922935 | 0.000158303 | 0.00040808 | 520 | 463 |
| MAP4K3         | 0.16487519  | 0.000159009 | 0.0004098  | 520 | 520 |
| SERTAD4        | 0.164873345 | 0.000159036 | 0.00040981 | 520 | 518 |
| OR51E2         | 0.164864147 | 0.000159172 | 0.00041011 | 520 | 464 |
| AQP10          | 0.164844288 | 0.000159467 | 0.00041082 | 520 | 479 |
| GABPB1         | 0.164777286 | 0.000160466 | 0.00041324 | 520 | 520 |
| NCRNA00181     | 0.164732523 | 0.000161136 | 0.0004148  | 520 | 520 |
| LPIN2          | 0.164667047 | 0.000162121 | 0.00041729 | 520 | 520 |
| USP25          | 0.164656501 | 0.000162281 | 0.00041754 | 520 | 520 |
| FOXO3B         | 0.164644588 | 0.000162461 | 0.00041795 | 520 | 520 |
| RAC2           | 0.164629798 | 0.000162685 | 0.00041842 | 520 | 520 |
| PSG3           | 0.164629555 | 0.000162688 | 0.00041842 | 520 | 182 |
| THADA          | 0.164623239 | 0.000162784 | 0.00041851 | 520 | 520 |
| BTN2A2         | 0.164602654 | 0.000163096 | 0.00041924 | 520 | 520 |
| LGI1           | 0.164596377 | 0.000163191 | 0.0004194  | 520 | 248 |
| C7             | 0.164553096 | 0.00016385  | 0.00042098 | 520 | 481 |
| STAM2          | 0.164473141 | 0.000165073 | 0.00042391 | 520 | 520 |
| C19orf26       | 0.164466403 | 0.000165176 | 0.00042412 | 520 | 519 |
| C5orf4         | 0.164436933 | 0.000165629 | 0.00042512 | 520 | 520 |
| SPG20          | 0.164395352 | 0.000166271 | 0.0004266  | 520 | 520 |
| CNTF           | 0.164326347 | 0.00016734  | 0.00042924 | 520 | 513 |
| SLC22A16       | 0.164284662 | 0.00016799  | 0.00043085 | 520 | 457 |
| CREBBP         | 0.164278115 | 0.000168092 | 0.00043105 | 520 | 520 |
| DKFZp686O24166 | 0.164123939 | 0.000170515 | 0.00043694 | 520 | 519 |
| TEX2           | 0.164069522 | 0.000171378 | 0.00043898 | 520 | 520 |
| SPATC1         | 0.164065646 | 0.00017144  | 0.00043908 | 520 | 492 |
| GJA3           | 0.164060095 | 0.000171528 | 0.0004392  | 520 | 519 |
| ELP2           | 0.164042454 | 0.000171809 | 0.00043986 | 520 | 520 |
| CRKL           | 0.164029466 | 0.000172016 | 0.00044023 | 520 | 520 |
| THRB           | 0.163973984 | 0.000172903 | 0.00044238 | 520 | 520 |
| LOC340508      | 0.163911536 | 0.000173907 | 0.00044471 | 520 | 326 |
| SRC            | 0.163895044 | 0.000174173 | 0.00044529 | 520 | 520 |
| STAMBPL1       | 0.163887575 | 0.000174294 | 0.00044549 | 520 | 520 |
| RAB2B          | 0.163831179 | 0.000175207 | 0.00044765 | 520 | 520 |

|           |             |             |            |     |     |
|-----------|-------------|-------------|------------|-----|-----|
| JKAMP     | 0.163804047 | 0.000175648 | 0.00044864 | 520 | 520 |
| EYS       | 0.163803405 | 0.000175658 | 0.00044864 | 520 | 514 |
| ZNF708    | 0.163771636 | 0.000176176 | 0.00044979 | 520 | 520 |
| HPS5      | 0.16373234  | 0.000176818 | 0.00045137 | 520 | 520 |
| GATA2     | 0.163706492 | 0.000177242 | 0.00045234 | 520 | 520 |
| CD72      | 0.163622174 | 0.000178631 | 0.00045576 | 520 | 519 |
| IQCA1     | 0.163618979 | 0.000178683 | 0.00045584 | 520 | 518 |
| GEMIN5    | 0.163584578 | 0.000179253 | 0.00045718 | 520 | 520 |
| MESDC1    | 0.163574365 | 0.000179422 | 0.00045755 | 520 | 520 |
| PYROXD2   | 0.163540275 | 0.000179989 | 0.00045894 | 520 | 520 |
| psiTPTE22 | 0.163537349 | 0.000180038 | 0.00045901 | 520 | 517 |
| RNF146    | 0.163486739 | 0.000180882 | 0.00046098 | 520 | 520 |
| HEATR5A   | 0.163473814 | 0.000181099 | 0.00046148 | 520 | 520 |
| EEF1A2    | 0.163440671 | 0.000181654 | 0.00046278 | 520 | 520 |
| ZNF91     | 0.163391577 | 0.00018248  | 0.00046482 | 520 | 520 |
| NF2       | 0.163244243 | 0.000184981 | 0.00047072 | 520 | 520 |
| SMCR8     | 0.16314219  | 0.000186731 | 0.00047493 | 520 | 520 |
| MOBKL2B   | 0.163085387 | 0.000187712 | 0.00047713 | 520 | 520 |
| C2orf39   | 0.163058396 | 0.00018818  | 0.00047819 | 520 | 437 |
| ST6GAL1   | 0.16305396  | 0.000188257 | 0.00047833 | 520 | 520 |
| ATP2B1    | 0.162989217 | 0.000189385 | 0.00048113 | 520 | 520 |
| ZNF621    | 0.162872278 | 0.000191437 | 0.00048616 | 520 | 520 |
| PBLD      | 0.162697519 | 0.000194542 | 0.0004938  | 520 | 520 |
| EIF2AK3   | 0.162664715 | 0.00019513  | 0.00049523 | 520 | 520 |
| TULP4     | 0.162650936 | 0.000195378 | 0.00049566 | 520 | 520 |
| LOC727896 | 0.162649731 | 0.0001954   | 0.00049566 | 520 | 519 |
| ABI3      | 0.162631641 | 0.000195725 | 0.00049643 | 520 | 520 |
| BTD       | 0.162582515 | 0.000196612 | 0.00049843 | 520 | 520 |
| TLR2      | 0.162572758 | 0.000196788 | 0.00049881 | 520 | 520 |
| NCDN      | 0.162560839 | 0.000197004 | 0.00049929 | 520 | 520 |
| GTSF1     | 0.162558858 | 0.00019704  | 0.00049932 | 520 | 507 |
| FRZB      | 0.162545673 | 0.000197279 | 0.00049987 | 520 | 520 |
| ITGA3     | 0.162539523 | 0.00019739  | 0.00050009 | 520 | 520 |
| CLEC6A    | 0.162482536 | 0.000198427 | 0.00050265 | 520 | 399 |
| DOCK8     | 0.162415765 | 0.000199649 | 0.00050562 | 520 | 520 |
| MCTP1     | 0.162357952 | 0.000200712 | 0.00050812 | 520 | 520 |
| SLC25A46  | 0.16223249  | 0.000203037 | 0.00051381 | 520 | 520 |
| VANGL1    | 0.162226913 | 0.000203141 | 0.00051401 | 520 | 520 |
| UBR2      | 0.162201154 | 0.000203622 | 0.0005151  | 520 | 520 |
| FAM178A   | 0.16219634  | 0.000203712 | 0.00051526 | 520 | 520 |
| C22orf25  | 0.162162531 | 0.000204345 | 0.00051665 | 520 | 520 |
| AMACR     | 0.16216039  | 0.000204385 | 0.00051665 | 520 | 520 |
| CPB1      | 0.162096645 | 0.000205584 | 0.00051941 | 520 | 183 |
| C1orf58   | 0.162011722 | 0.000207191 | 0.00052327 | 520 | 520 |
| RRAGC     | 0.162007879 | 0.000207264 | 0.00052339 | 520 | 520 |
| LOC441666 | 0.161994894 | 0.000207511 | 0.00052395 | 520 | 485 |

|          |             |             |            |     |     |
|----------|-------------|-------------|------------|-----|-----|
| ARHGDIB  | 0.161988783 | 0.000207627 | 0.00052418 | 520 | 520 |
| BMP2K    | 0.161986621 | 0.000207668 | 0.00052421 | 520 | 520 |
| CYTIP    | 0.161869281 | 0.000209913 | 0.00052928 | 520 | 520 |
| PRCP     | 0.161850958 | 0.000210266 | 0.00053011 | 520 | 520 |
| PCDHAC1  | 0.161845961 | 0.000210362 | 0.00053028 | 520 | 309 |
| ZNF487   | 0.161806953 | 0.000211115 | 0.00053191 | 520 | 519 |
| PSG1     | 0.161789476 | 0.000211453 | 0.00053263 | 520 | 262 |
| SPRYD3   | 0.161784509 | 0.000211549 | 0.00053281 | 520 | 520 |
| TMTC1    | 0.161772516 | 0.000211781 | 0.00053333 | 520 | 520 |
| C15orf38 | 0.161754127 | 0.000212138 | 0.00053409 | 520 | 520 |
| RAG1     | 0.161691674 | 0.000213354 | 0.00053669 | 520 | 520 |
| GPR50    | 0.161660607 | 0.000213961 | 0.00053808 | 520 | 366 |
| PCDHB11  | 0.161614169 | 0.000214872 | 0.00054023 | 520 | 517 |
| ESRRG    | 0.161553316 | 0.000216071 | 0.00054311 | 520 | 450 |
| REPS2    | 0.161545562 | 0.000216224 | 0.00054343 | 520 | 520 |
| NUP98    | 0.161514534 | 0.000216838 | 0.00054477 | 520 | 520 |
| LCOR     | 0.16142203  | 0.000218679 | 0.00054908 | 520 | 519 |
| RIMBP3   | 0.161421508 | 0.000218689 | 0.00054908 | 520 | 520 |
| HMGN4    | 0.161357966 | 0.000219962 | 0.00055214 | 520 | 520 |
| EHD4     | 0.161339881 | 0.000220326 | 0.00055291 | 520 | 520 |
| ZFP37    | 0.161167512 | 0.000223819 | 0.00056119 | 520 | 519 |
| FOLR3    | 0.161154319 | 0.000224089 | 0.0005618  | 520 | 494 |
| C11orf90 | 0.161009166 | 0.000227074 | 0.00056886 | 520 | 374 |
| SDSL     | 0.161007174 | 0.000227115 | 0.00056889 | 520 | 520 |
| DNAJC22  | 0.160902444 | 0.000229293 | 0.00057399 | 520 | 503 |
| KCNQ1    | 0.160857723 | 0.000230229 | 0.00057619 | 520 | 520 |
| ARHGAP25 | 0.160833274 | 0.000230742 | 0.0005774  | 520 | 520 |
| CACNG4   | 0.160771523 | 0.000232042 | 0.00058029 | 520 | 506 |
| ACER3    | 0.160694691 | 0.00023367  | 0.00058422 | 520 | 520 |
| GTF2A1L  | 0.160665814 | 0.000234285 | 0.00058561 | 520 | 426 |
| ARFGEF1  | 0.160646211 | 0.000234703 | 0.00058651 | 520 | 520 |
| GCG      | 0.16059993  | 0.000235693 | 0.00058884 | 520 | 30  |
| DLX2     | 0.160593007 | 0.000235841 | 0.00058913 | 520 | 509 |
| CXorf38  | 0.160571485 | 0.000236303 | 0.00059022 | 520 | 520 |
| LRRK2    | 0.160553865 | 0.000236682 | 0.00059109 | 520 | 519 |
| C4orf46  | 0.160501106 | 0.000237819 | 0.00059378 | 520 | 520 |
| YIPF2    | 0.160447583 | 0.000238978 | 0.00059646 | 520 | 520 |
| LSM11    | 0.160444942 | 0.000239036 | 0.00059652 | 520 | 520 |
| B3GALT2  | 0.160410545 | 0.000239784 | 0.00059817 | 520 | 488 |
| LYL1     | 0.160386433 | 0.000240309 | 0.00059941 | 520 | 520 |
| CD274    | 0.160360889 | 0.000240867 | 0.00060072 | 520 | 520 |
| SIN3A    | 0.160312558 | 0.000241926 | 0.00060314 | 520 | 520 |
| CPM      | 0.160255349 | 0.000243186 | 0.00060613 | 520 | 520 |
| CLEC12A  | 0.160246649 | 0.000243378 | 0.00060653 | 520 | 519 |
| PPPDE1   | 0.160232822 | 0.000243683 | 0.00060722 | 520 | 520 |
| EFR3B    | 0.160151066 | 0.000245497 | 0.00061159 | 520 | 520 |

|           |             |             |            |     |     |
|-----------|-------------|-------------|------------|-----|-----|
| ZNF543    | 0.160124161 | 0.000246097 | 0.00061301 | 520 | 520 |
| DAG1      | 0.160122063 | 0.000246143 | 0.00061305 | 520 | 520 |
| PCDHB6    | 0.16009894  | 0.00024666  | 0.00061418 | 520 | 511 |
| HSP90B1   | 0.160090092 | 0.000246858 | 0.0006146  | 520 | 520 |
| CASK      | 0.160062051 | 0.000247486 | 0.00061609 | 520 | 520 |
| ADORA2A   | 0.159966725 | 0.000249633 | 0.00062111 | 520 | 520 |
| INVS      | 0.15992409  | 0.000250599 | 0.00062337 | 520 | 520 |
| CAPN5     | 0.159897199 | 0.00025121  | 0.00062474 | 520 | 520 |
| NNT       | 0.159860797 | 0.000252039 | 0.00062657 | 520 | 520 |
| MGC23284  | 0.159803099 | 0.000253358 | 0.00062977 | 520 | 520 |
| SELL      | 0.159735141 | 0.000254921 | 0.0006335  | 520 | 520 |
| VPS35     | 0.159729146 | 0.000255059 | 0.00063377 | 520 | 520 |
| VASP      | 0.159679375 | 0.00025621  | 0.00063647 | 520 | 520 |
| SEL1L2    | 0.159642732 | 0.00025706  | 0.00063835 | 520 | 81  |
| CYP7B1    | 0.159602307 | 0.000258001 | 0.0006406  | 520 | 519 |
| UPRT      | 0.159534605 | 0.000259585 | 0.00064438 | 520 | 520 |
| CDK20     | 0.159523809 | 0.000259838 | 0.00064493 | 520 | 520 |
| STX7      | 0.159466101 | 0.000261196 | 0.00064798 | 520 | 520 |
| NCKAP1    | 0.15944522  | 0.000261689 | 0.00064912 | 520 | 520 |
| PBRM1     | 0.159385866 | 0.000263095 | 0.00065237 | 520 | 520 |
| RANBP2    | 0.159372    | 0.000263425 | 0.00065294 | 520 | 520 |
| BTG4      | 0.159309173 | 0.000264923 | 0.00065649 | 520 | 357 |
| GPNMB     | 0.159285855 | 0.000265481 | 0.00065772 | 520 | 520 |
| DPYD      | 0.159194745 | 0.000267671 | 0.0006629  | 520 | 520 |
| TTC38     | 0.15919272  | 0.00026772  | 0.00066294 | 520 | 520 |
| FSCN1     | 0.15916489  | 0.000268393 | 0.00066452 | 520 | 520 |
| ALCAM     | 0.159150947 | 0.00026873  | 0.00066511 | 520 | 520 |
| TULP3     | 0.159118431 | 0.000269519 | 0.00066698 | 520 | 520 |
| SPANXA2   | 0.159085615 | 0.000270317 | 0.00066879 | 520 | 170 |
| ZDHHC2    | 0.158996804 | 0.000272489 | 0.00067384 | 520 | 520 |
| PYCR1     | 0.158821432 | 0.000276825 | 0.00068431 | 520 | 520 |
| PAWR      | 0.158760115 | 0.000278356 | 0.00068801 | 520 | 520 |
| DOK2      | 0.158756298 | 0.000278451 | 0.00068816 | 520 | 520 |
| CLSTN1    | 0.158732552 | 0.000279046 | 0.00068938 | 520 | 520 |
| SPEF2     | 0.158697889 | 0.000279918 | 0.00069136 | 520 | 516 |
| ZC3H7A    | 0.158688532 | 0.000280153 | 0.00069186 | 520 | 520 |
| NTAN1     | 0.158644973 | 0.000281252 | 0.00069449 | 520 | 520 |
| LACTB     | 0.158626173 | 0.000281728 | 0.00069557 | 520 | 520 |
| SCARA3    | 0.158603157 | 0.000282311 | 0.00069684 | 520 | 520 |
| DDX19A    | 0.158543643 | 0.000283825 | 0.00070024 | 520 | 520 |
| PARN      | 0.158513884 | 0.000284584 | 0.00070194 | 520 | 520 |
| AFF2      | 0.158489122 | 0.000285218 | 0.00070333 | 520 | 514 |
| TMEM144   | 0.158459175 | 0.000285986 | 0.00070505 | 520 | 520 |
| LOC150622 | 0.15845566  | 0.000286076 | 0.00070519 | 520 | 232 |
| CMBL      | 0.158441988 | 0.000286427 | 0.00070588 | 520 | 520 |
| MYEF2     | 0.158378023 | 0.000288077 | 0.00070986 | 520 | 520 |

|          |             |             |            |     |     |
|----------|-------------|-------------|------------|-----|-----|
| RNF160   | 0.158299616 | 0.00029011  | 0.0007147  | 520 | 520 |
| HHEX     | 0.158285416 | 0.00029048  | 0.00071552 | 520 | 520 |
| IKZF1    | 0.158275459 | 0.000290739 | 0.00071607 | 520 | 520 |
| C16orf87 | 0.15818735  | 0.000293045 | 0.00072149 | 520 | 520 |
| ITK      | 0.158142402 | 0.000294228 | 0.00072413 | 520 | 519 |
| RYR2     | 0.157979529 | 0.000298552 | 0.0007345  | 520 | 513 |
| CLDN9    | 0.157943495 | 0.000299516 | 0.00073679 | 520 | 491 |
| PKHD1    | 0.157909405 | 0.000300432 | 0.00073877 | 520 | 438 |
| ZNF624   | 0.157784232 | 0.000303815 | 0.00074663 | 520 | 520 |
| CLEC18B  | 0.157740655 | 0.000305001 | 0.00074936 | 520 | 490 |
| C1orf152 | 0.157708153 | 0.000305888 | 0.00075136 | 520 | 512 |
| PAPOLB   | 0.157686739 | 0.000306474 | 0.00075271 | 520 | 239 |
| KIAA1199 | 0.157676325 | 0.000306759 | 0.00075332 | 520 | 520 |
| ELK4     | 0.157663768 | 0.000307104 | 0.00075407 | 520 | 520 |
| EDN3     | 0.157653314 | 0.000307391 | 0.00075469 | 520 | 323 |
| SLC6A20  | 0.157638594 | 0.000307795 | 0.00075559 | 520 | 493 |
| SEC14L4  | 0.157586741 | 0.000309224 | 0.00075891 | 520 | 433 |
| LRRC40   | 0.157535923 | 0.000310631 | 0.00076199 | 520 | 520 |
| DIP2B    | 0.157440783 | 0.00031328  | 0.00076821 | 520 | 520 |
| RARRES1  | 0.157431367 | 0.000313544 | 0.00076876 | 520 | 518 |
| EDEM2    | 0.157384403 | 0.00031486  | 0.00077148 | 520 | 520 |
| TTC5     | 0.157369065 | 0.000315291 | 0.0007723  | 520 | 520 |
| E2F3     | 0.15734189  | 0.000316056 | 0.00077398 | 520 | 520 |
| C16orf62 | 0.157334606 | 0.000316262 | 0.0007743  | 520 | 520 |
| LY96     | 0.157319189 | 0.000316697 | 0.00077527 | 520 | 520 |
| RPS6KA3  | 0.157313197 | 0.000316866 | 0.00077559 | 520 | 520 |
| SH2B2    | 0.157284732 | 0.000317671 | 0.00077718 | 520 | 520 |
| BMI1     | 0.157254588 | 0.000318526 | 0.00077908 | 520 | 520 |
| ZNF883   | 0.157220765 | 0.000319488 | 0.00078134 | 520 | 511 |
| DPYSL5   | 0.157153953 | 0.000321396 | 0.00078572 | 520 | 406 |
| ANKRD42  | 0.157118583 | 0.00032241  | 0.0007879  | 520 | 520 |
| KCNC1    | 0.157089084 | 0.000323258 | 0.0007897  | 520 | 420 |
| CEND1    | 0.157039101 | 0.0003247   | 0.00079284 | 520 | 514 |
| SORCS3   | 0.156958229 | 0.000327046 | 0.00079837 | 520 | 205 |
| ZDHHC16  | 0.156949752 | 0.000327292 | 0.00079888 | 520 | 520 |
| ZNF449   | 0.156908964 | 0.000328482 | 0.00080159 | 520 | 520 |
| MYSM1    | 0.156862709 | 0.000329837 | 0.00080454 | 520 | 519 |
| CSNK1E   | 0.156826165 | 0.00033091  | 0.00080702 | 520 | 520 |
| ANGPTL5  | 0.156796638 | 0.00033178  | 0.00080895 | 520 | 208 |
| COG3     | 0.156768831 | 0.000332601 | 0.00081066 | 520 | 520 |
| DCUN1D4  | 0.156752779 | 0.000333076 | 0.00081172 | 520 | 520 |
| C1QL1    | 0.156747318 | 0.000333238 | 0.00081201 | 520 | 520 |
| SYN3     | 0.156727641 | 0.000333821 | 0.00081324 | 520 | 430 |
| EMR4P    | 0.156694156 | 0.000334816 | 0.00081556 | 520 | 489 |
| POU4F3   | 0.156666195 | 0.000335648 | 0.00081739 | 520 | 393 |
| WIPF3    | 0.156640893 | 0.000336403 | 0.00081884 | 520 | 517 |

|           |             |             |            |     |     |
|-----------|-------------|-------------|------------|-----|-----|
| PLS3      | 0.156609372 | 0.000337346 | 0.00082103 | 520 | 520 |
| RNF2      | 0.156590523 | 0.000337912 | 0.00082201 | 520 | 520 |
| LHB       | 0.156564461 | 0.000338694 | 0.00082382 | 520 | 492 |
| THSD4     | 0.156552472 | 0.000339055 | 0.00082459 | 520 | 520 |
| EYA3      | 0.156510123 | 0.000340332 | 0.0008273  | 520 | 520 |
| PSG6      | 0.15645992  | 0.000341851 | 0.00083069 | 520 | 200 |
| MLL2      | 0.156454539 | 0.000342015 | 0.00083099 | 520 | 520 |
| RNF111    | 0.156432348 | 0.000342688 | 0.00083253 | 520 | 520 |
| CCDC158   | 0.156427932 | 0.000342823 | 0.00083275 | 520 | 331 |
| C10orf93  | 0.156364011 | 0.000344772 | 0.00083718 | 520 | 356 |
| DST       | 0.156348091 | 0.000345259 | 0.00083806 | 520 | 520 |
| RAB33B    | 0.1562927   | 0.000346958 | 0.00084178 | 520 | 520 |
| GRRP1     | 0.156188809 | 0.000350167 | 0.00084926 | 520 | 519 |
| VEGFB     | 0.156166528 | 0.000350858 | 0.00085084 | 520 | 520 |
| ZNF322A   | 0.156133905 | 0.000351874 | 0.0008532  | 520 | 520 |
| IFT88     | 0.156091749 | 0.000353189 | 0.00085608 | 520 | 520 |
| KCNN4     | 0.155965447 | 0.000357159 | 0.00086539 | 520 | 520 |
| POM121L8P | 0.155945988 | 0.000357774 | 0.00086677 | 520 | 337 |
| ZNF555    | 0.155940378 | 0.000357952 | 0.0008671  | 520 | 520 |
| PCMTD1    | 0.15593833  | 0.000358017 | 0.00086715 | 520 | 520 |
| CNNM2     | 0.155905705 | 0.000359051 | 0.00086935 | 520 | 520 |
| ZNF12     | 0.155901717 | 0.000359178 | 0.00086955 | 520 | 520 |
| GTF3C4    | 0.155878547 | 0.000359914 | 0.00087123 | 520 | 520 |
| SERPINB9  | 0.155798389 | 0.000362474 | 0.000877   | 520 | 520 |
| ZNF142    | 0.155774067 | 0.000363253 | 0.00087847 | 520 | 520 |
| IL17RD    | 0.155772352 | 0.000363309 | 0.00087849 | 520 | 520 |
| RCAN1     | 0.155722656 | 0.000364907 | 0.00088183 | 520 | 520 |
| CHIT1     | 0.155711201 | 0.000365276 | 0.00088262 | 520 | 518 |
| RELA      | 0.155648198 | 0.000367314 | 0.00088722 | 520 | 520 |
| C9orf64   | 0.155641058 | 0.000367546 | 0.00088768 | 520 | 520 |
| CMIP      | 0.155621104 | 0.000368194 | 0.00088913 | 520 | 520 |
| CD69      | 0.155595099 | 0.00036904  | 0.00089107 | 520 | 519 |
| APOB48R   | 0.15541301  | 0.000375016 | 0.00090454 | 520 | 520 |
| HEATR3    | 0.155412776 | 0.000375024 | 0.00090454 | 520 | 520 |
| B4GALT5   | 0.155396818 | 0.000375552 | 0.0009056  | 520 | 520 |
| BACH1     | 0.155379925 | 0.000376111 | 0.00090673 | 520 | 520 |
| ATL3      | 0.155360727 | 0.000376748 | 0.00090805 | 520 | 520 |
| KBTBD6    | 0.155229712 | 0.000381123 | 0.00091815 | 520 | 520 |
| AFAP1L2   | 0.155215821 | 0.000381589 | 0.00091906 | 520 | 520 |
| CDH8      | 0.155205284 | 0.000381943 | 0.0009198  | 520 | 489 |
| ZNF71     | 0.155034391 | 0.000387731 | 0.00093296 | 520 | 520 |
| C20orf4   | 0.15500925  | 0.00038859  | 0.0009348  | 520 | 520 |
| PSG10     | 0.154987668 | 0.000389328 | 0.00093624 | 520 | 63  |
| RAB2A     | 0.154939471 | 0.000390982 | 0.00094011 | 520 | 520 |
| PARP4     | 0.154867243 | 0.000393472 | 0.00094576 | 520 | 520 |
| BAZ1B     | 0.154774527 | 0.00039669  | 0.00095281 | 520 | 520 |

|           |             |             |            |     |     |
|-----------|-------------|-------------|------------|-----|-----|
| YEATS2    | 0.154746236 | 0.000397677 | 0.00095495 | 520 | 520 |
| WDR26     | 0.154735816 | 0.000398041 | 0.0009556  | 520 | 520 |
| R3HDM2    | 0.154720297 | 0.000398583 | 0.00095668 | 520 | 520 |
| LRRC18    | 0.154718071 | 0.000398661 | 0.00095675 | 520 | 243 |
| CAMKK2    | 0.154698101 | 0.000399361 | 0.0009582  | 520 | 520 |
| KLHDC1    | 0.154679278 | 0.000400021 | 0.00095956 | 520 | 519 |
| ZNF292    | 0.154632632 | 0.000401662 | 0.00096326 | 520 | 520 |
| MAP4K2    | 0.15454994  | 0.000404587 | 0.0009697  | 520 | 520 |
| DNAJC24   | 0.154508592 | 0.000406057 | 0.00097283 | 520 | 520 |
| IGFBPL1   | 0.154453032 | 0.00040804  | 0.00097716 | 520 | 368 |
| IL13RA2   | 0.154416089 | 0.000409363 | 0.00097998 | 520 | 508 |
| FAM102B   | 0.154399531 | 0.000409958 | 0.00098129 | 520 | 520 |
| MTMR11    | 0.154397101 | 0.000410045 | 0.00098138 | 520 | 520 |
| BCOR      | 0.154374977 | 0.000410841 | 0.00098317 | 520 | 520 |
| BRPF3     | 0.154362222 | 0.0004113   | 0.00098404 | 520 | 520 |
| APOOL     | 0.154360614 | 0.000411358 | 0.00098406 | 520 | 520 |
| C20orf108 | 0.154333739 | 0.000412328 | 0.00098614 | 520 | 520 |
| IFNAR1    | 0.154331358 | 0.000412414 | 0.00098623 | 520 | 520 |
| VAV1      | 0.15425806  | 0.000415069 | 0.00099247 | 520 | 520 |
| PDP2      | 0.154207917 | 0.000416896 | 0.00099648 | 520 | 520 |
| LYST      | 0.154173381 | 0.000418158 | 0.0009989  | 520 | 520 |
| SHOX      | 0.154059588 | 0.000422341 | 0.0010083  | 520 | 209 |
| ZNF257    | 0.154058242 | 0.000422391 | 0.0010083  | 520 | 487 |
| USP40     | 0.154032484 | 0.000423343 | 0.00101045 | 520 | 520 |
| CYP39A1   | 0.154023427 | 0.000423679 | 0.00101113 | 520 | 519 |
| TMEM198   | 0.153994957 | 0.000424735 | 0.00101353 | 520 | 520 |
| SLC39A6   | 0.153907545 | 0.000427992 | 0.00102094 | 520 | 520 |
| TMEM87A   | 0.153847094 | 0.000430258 | 0.00102574 | 520 | 520 |
| KIAA0406  | 0.153841943 | 0.000430452 | 0.00102608 | 520 | 520 |
| LHX5      | 0.153836626 | 0.000430651 | 0.00102632 | 520 | 463 |
| LUZP2     | 0.153814492 | 0.000431485 | 0.00102818 | 520 | 453 |
| FCN3      | 0.153807999 | 0.000431729 | 0.00102855 | 520 | 520 |
| PAK2      | 0.153807637 | 0.000431743 | 0.00102855 | 520 | 520 |
| TMEM132B  | 0.153731526 | 0.000434621 | 0.00103511 | 520 | 516 |
| TRIM37    | 0.153723688 | 0.000434919 | 0.00103563 | 520 | 520 |
| CYFIP1    | 0.153705911 | 0.000435594 | 0.00103699 | 520 | 520 |
| LOC646762 | 0.153624691 | 0.000438692 | 0.00104424 | 520 | 520 |
| NAP1L6    | 0.153553866 | 0.00044141  | 0.00105022 | 520 | 260 |
| LRFN3     | 0.153521856 | 0.000442643 | 0.0010529  | 520 | 520 |
| HAO1      | 0.153468376 | 0.000444711 | 0.00105732 | 520 | 95  |
| KCNAB3    | 0.153440199 | 0.000445804 | 0.0010598  | 520 | 518 |
| USP31     | 0.153435987 | 0.000445968 | 0.00106006 | 520 | 520 |
| WIT1      | 0.153392375 | 0.000447665 | 0.00106359 | 520 | 236 |
| CNGB1     | 0.153368481 | 0.000448598 | 0.00106556 | 520 | 517 |
| DDX6      | 0.15334227  | 0.000449623 | 0.00106774 | 520 | 520 |
| TNFAIP8L2 | 0.153302832 | 0.00045117  | 0.00107116 | 520 | 520 |



|          |             |             |            |     |     |
|----------|-------------|-------------|------------|-----|-----|
| RBBP5    | 0.153266407 | 0.000452602 | 0.00107431 | 520 | 520 |
| ARL13B   | 0.153212064 | 0.000454748 | 0.00107902 | 520 | 520 |
| CHD8     | 0.15316877  | 0.000456464 | 0.00108271 | 520 | 520 |
| ETV6     | 0.153088774 | 0.00045965  | 0.0010895  | 520 | 520 |
| CYFIP2   | 0.153040174 | 0.000461596 | 0.00109386 | 520 | 520 |
| SLC7A2   | 0.153032675 | 0.000461897 | 0.00109431 | 520 | 519 |
| LGI4     | 0.153022565 | 0.000462303 | 0.00109515 | 520 | 520 |
| GNL3L    | 0.152966289 | 0.00046457  | 0.00110026 | 520 | 520 |
| KLHL15   | 0.152959711 | 0.000464835 | 0.00110076 | 520 | 520 |
| XAGE2    | 0.152922172 | 0.000466353 | 0.00110396 | 520 | 69  |
| TDRD9    | 0.152889977 | 0.000467659 | 0.00110692 | 520 | 509 |
| GIMAP7   | 0.152838369 | 0.000469759 | 0.00111176 | 520 | 519 |
| MAS1L    | 0.152832066 | 0.000470016 | 0.00111224 | 520 | 85  |
| PLAG1    | 0.152825525 | 0.000470283 | 0.00111274 | 520 | 519 |
| G6PC3    | 0.152809296 | 0.000470946 | 0.00111405 | 520 | 520 |
| KLHL9    | 0.152780104 | 0.000472141 | 0.00111675 | 520 | 520 |
| TECRL    | 0.152770405 | 0.000472539 | 0.00111755 | 520 | 163 |
| HLA-DMB  | 0.152752305 | 0.000473281 | 0.00111905 | 520 | 520 |
| ARHGEF11 | 0.152685903 | 0.000476015 | 0.00112499 | 520 | 520 |
| GPR158   | 0.152649398 | 0.000477525 | 0.00112829 | 520 | 508 |
| MYST4    | 0.152593128 | 0.00047986  | 0.00113341 | 520 | 520 |
| PREPL    | 0.152583024 | 0.00048028  | 0.00113427 | 520 | 520 |
| ACACB    | 0.152509774 | 0.000483339 | 0.00114127 | 520 | 520 |
| HRH4     | 0.152509287 | 0.000483359 | 0.00114127 | 520 | 417 |
| ARRB2    | 0.152463502 | 0.00048528  | 0.00114554 | 520 | 520 |
| TRIM68   | 0.152445225 | 0.000486049 | 0.00114722 | 520 | 520 |
| CXCL3    | 0.15240948  | 0.000487556 | 0.00115064 | 520 | 519 |
| BTBD7    | 0.152400249 | 0.000487945 | 0.00115143 | 520 | 520 |
| SLC6A13  | 0.152330611 | 0.000490896 | 0.00115785 | 520 | 441 |
| USP10    | 0.152299616 | 0.000492214 | 0.00116068 | 520 | 520 |
| LASS1    | 0.152261798 | 0.000493827 | 0.0011643  | 520 | 494 |
| SIGLECP3 | 0.152241005 | 0.000494716 | 0.00116617 | 520 | 502 |
| ASB4     | 0.152227013 | 0.000495315 | 0.00116745 | 520 | 258 |
| ZNF551   | 0.152161272 | 0.000498139 | 0.00117369 | 520 | 520 |
| IL6R     | 0.152126032 | 0.000499659 | 0.00117714 | 520 | 520 |
| CYP27B1  | 0.152028171 | 0.000503902 | 0.00118658 | 520 | 520 |
| ZDBF2    | 0.152005733 | 0.00050488  | 0.00118874 | 520 | 520 |
| AMTN     | 0.151984462 | 0.000505808 | 0.00119065 | 520 | 498 |
| TNNT1    | 0.151977797 | 0.000506099 | 0.0011912  | 520 | 520 |
| UBE2J1   | 0.151963754 | 0.000506713 | 0.00119236 | 520 | 520 |
| FRAS1    | 0.151912905 | 0.000508943 | 0.00119719 | 520 | 520 |
| IP6K1    | 0.151907153 | 0.000509195 | 0.00119751 | 520 | 520 |
| TREML3   | 0.151882608 | 0.000510275 | 0.00119963 | 520 | 449 |
| FAM161A  | 0.15183446  | 0.0005124   | 0.00120421 | 520 | 519 |
| FER1L6   | 0.15183436  | 0.000512404 | 0.00120421 | 520 | 487 |
| BAT2     | 0.151802037 | 0.000513835 | 0.00120729 | 520 | 520 |

|          |             |             |            |     |     |
|----------|-------------|-------------|------------|-----|-----|
| GABRA3   | 0.151793455 | 0.000514216 | 0.00120804 | 520 | 499 |
| ABCA4    | 0.151776137 | 0.000514985 | 0.00120971 | 520 | 514 |
| VEZT     | 0.15175336  | 0.000515997 | 0.00121195 | 520 | 520 |
| ATP9A    | 0.15169785  | 0.000518473 | 0.00121748 | 520 | 520 |
| TCEA2    | 0.151694709 | 0.000518613 | 0.00121767 | 520 | 520 |
| NLGN3    | 0.151675233 | 0.000519485 | 0.00121957 | 520 | 518 |
| CCL21    | 0.151654032 | 0.000520435 | 0.00122166 | 520 | 520 |
| SP3      | 0.15163557  | 0.000521264 | 0.00122346 | 520 | 520 |
| MGC16121 | 0.151608942 | 0.000522461 | 0.00122599 | 520 | 516 |
| NUDCD3   | 0.151580614 | 0.000523738 | 0.00122858 | 520 | 520 |
| SLC25A43 | 0.151580345 | 0.00052375  | 0.00122858 | 520 | 520 |
| MGC12916 | 0.151571782 | 0.000524136 | 0.00122935 | 520 | 519 |
| PSG11    | 0.151548176 | 0.000525203 | 0.00123156 | 520 | 71  |
| COPZ2    | 0.151493277 | 0.000527692 | 0.00123682 | 520 | 520 |
| NPAT     | 0.151491441 | 0.000527776 | 0.00123687 | 520 | 520 |
| ATE1     | 0.151473    | 0.000528614 | 0.0012387  | 520 | 520 |
| TMCO7    | 0.15144364  | 0.000529952 | 0.00124169 | 520 | 520 |
| TAT      | 0.151413882 | 0.000531311 | 0.00124458 | 520 | 295 |
| PRKCSH   | 0.151399747 | 0.000531958 | 0.00124587 | 520 | 520 |
| TOR1A    | 0.151399158 | 0.000531985 | 0.00124587 | 520 | 520 |
| AKR1B1   | 0.151378024 | 0.000532953 | 0.00124792 | 520 | 520 |
| PHF21B   | 0.151377372 | 0.000532983 | 0.00124792 | 520 | 455 |
| KIF1A    | 0.151351187 | 0.000534185 | 0.00125045 | 520 | 451 |
| HERC3    | 0.151351153 | 0.000534187 | 0.00125045 | 520 | 520 |
| HLA-DPA1 | 0.151269847 | 0.000537935 | 0.00125878 | 520 | 520 |
| RNF219   | 0.151156908 | 0.000543183 | 0.00127062 | 520 | 520 |
| BBS5     | 0.151110945 | 0.000545332 | 0.00127535 | 520 | 520 |
| PABPC4   | 0.151103404 | 0.000545686 | 0.00127603 | 520 | 520 |
| TRPM7    | 0.151009171 | 0.000550119 | 0.0012858  | 520 | 520 |
| C2orf51  | 0.150876757 | 0.000556406 | 0.00130019 | 520 | 133 |
| NKD2     | 0.150826382 | 0.000558815 | 0.00130522 | 520 | 520 |
| C1orf190 | 0.150777085 | 0.000561182 | 0.00131059 | 520 | 517 |
| RGPD1    | 0.150751418 | 0.000562418 | 0.00131303 | 520 | 520 |
| EIF2AK2  | 0.15071017  | 0.00056441  | 0.00131737 | 520 | 520 |
| BIN2     | 0.150669418 | 0.000566384 | 0.00132167 | 520 | 520 |
| AWAT2    | 0.150644607 | 0.000567589 | 0.00132418 | 520 | 151 |
| EPC2     | 0.150611207 | 0.000569215 | 0.0013278  | 520 | 520 |
| AMOTL2   | 0.150610025 | 0.000569273 | 0.0013278  | 520 | 520 |
| HLA-DPB1 | 0.150559383 | 0.000571747 | 0.00133341 | 520 | 520 |
| ANGPT4   | 0.150557022 | 0.000571862 | 0.00133353 | 520 | 292 |
| NAALADL2 | 0.150485554 | 0.000575371 | 0.00134094 | 520 | 513 |
| ETV3L    | 0.150482127 | 0.00057554  | 0.00134118 | 520 | 510 |
| EEF2     | 0.150379413 | 0.000580619 | 0.00135254 | 520 | 520 |
| WAS      | 0.150363669 | 0.000581402 | 0.00135421 | 520 | 520 |
| MYO3B    | 0.150268382 | 0.000586157 | 0.00136486 | 520 | 510 |
| IGSF11   | 0.150267969 | 0.000586178 | 0.00136486 | 520 | 497 |

|           |             |             |            |     |     |
|-----------|-------------|-------------|------------|-----|-----|
| FAM78B    | 0.150243247 | 0.000587417 | 0.00136759 | 520 | 520 |
| ZNF287    | 0.150220901 | 0.00058854  | 0.00137004 | 520 | 519 |
| DNAH14    | 0.150149968 | 0.000592117 | 0.00137789 | 520 | 514 |
| TMOD1     | 0.150053772 | 0.000597    | 0.00138797 | 520 | 520 |
| BACE2     | 0.150045123 | 0.00059744  | 0.00138884 | 520 | 520 |
| POLM      | 0.15003655  | 0.000597878 | 0.0013897  | 520 | 520 |
| ZIM2      | 0.149954242 | 0.000602091 | 0.00139884 | 520 | 138 |
| TSPYL2    | 0.14994245  | 0.000602697 | 0.00140009 | 520 | 520 |
| RBM16     | 0.149920829 | 0.000603809 | 0.00140235 | 520 | 520 |
| CCDC54    | 0.149890997 | 0.000605347 | 0.0014056  | 520 | 201 |
| NUP155    | 0.14988713  | 0.000605547 | 0.0014059  | 520 | 520 |
| SLC35E1   | 0.149817514 | 0.000609151 | 0.00141378 | 520 | 520 |
| SLC17A7   | 0.149812213 | 0.000609426 | 0.00141426 | 520 | 519 |
| ZNF773    | 0.14962186  | 0.000619387 | 0.00143655 | 520 | 520 |
| 8-Sep     | 0.149611054 | 0.000619957 | 0.0014377  | 520 | 520 |
| CSTF2T    | 0.149563433 | 0.000622475 | 0.00144288 | 520 | 520 |
| ZNF573    | 0.149495352 | 0.000626091 | 0.00145092 | 520 | 510 |
| HMBOX1    | 0.149466228 | 0.000627643 | 0.00145419 | 520 | 520 |
| SLC12A7   | 0.149455749 | 0.000628203 | 0.00145532 | 520 | 520 |
| CCDC163P  | 0.149452344 | 0.000628385 | 0.00145557 | 520 | 510 |
| FZD10     | 0.14943553  | 0.000629284 | 0.00145715 | 520 | 520 |
| ZNF569    | 0.149431817 | 0.000629483 | 0.00145744 | 520 | 519 |
| C21orf62  | 0.149407303 | 0.000630796 | 0.00146014 | 520 | 352 |
| C17orf85  | 0.14940418  | 0.000630963 | 0.0014602  | 520 | 520 |
| ARFGEF2   | 0.149319962 | 0.000635496 | 0.00147035 | 520 | 520 |
| AKAP9     | 0.149241919 | 0.000639723 | 0.00147996 | 520 | 520 |
| IL13RA1   | 0.149182878 | 0.000642938 | 0.00148706 | 520 | 520 |
| ULK4      | 0.149142304 | 0.000645156 | 0.00149202 | 520 | 520 |
| SEMA6A    | 0.149132057 | 0.000645717 | 0.00149315 | 520 | 520 |
| TNFRSF6B  | 0.149089461 | 0.000648055 | 0.00149821 | 520 | 520 |
| CYP27C1   | 0.149042044 | 0.000650667 | 0.0015039  | 520 | 518 |
| ZNF619    | 0.148986014 | 0.000653766 | 0.00151089 | 520 | 519 |
| ABCC12    | 0.148932489 | 0.000656739 | 0.00151724 | 520 | 141 |
| PTAR1     | 0.148915458 | 0.000657688 | 0.00151909 | 520 | 520 |
| TCEAL1    | 0.148851261 | 0.000661276 | 0.0015265  | 520 | 520 |
| EIF3A     | 0.148837218 | 0.000662063 | 0.00152779 | 520 | 520 |
| GALNT7    | 0.14879751  | 0.000664293 | 0.00153263 | 520 | 520 |
| CWF19L2   | 0.148797213 | 0.00066431  | 0.00153263 | 520 | 520 |
| LOC388242 | 0.148782414 | 0.000665143 | 0.00153437 | 520 | 520 |
| ANKRD34C  | 0.148777192 | 0.000665437 | 0.0015347  | 520 | 237 |
| SNRK      | 0.148659732 | 0.000672087 | 0.0015495  | 520 | 520 |
| EBI3      | 0.148622802 | 0.00067419  | 0.00155417 | 520 | 520 |
| TLE6      | 0.148572376 | 0.000677072 | 0.00156046 | 520 | 511 |
| FRS3      | 0.148567803 | 0.000677334 | 0.00156089 | 520 | 520 |
| SPANXE    | 0.14852719  | 0.000679664 | 0.00156608 | 520 | 174 |
| AMOTL1    | 0.148511668 | 0.000680556 | 0.00156795 | 520 | 520 |

|          |             |             |            |     |     |
|----------|-------------|-------------|------------|-----|-----|
| GATSL1   | 0.148472766 | 0.000682798 | 0.00157258 | 520 | 517 |
| SCYL2    | 0.148417169 | 0.000686014 | 0.00157945 | 520 | 520 |
| CMTM4    | 0.148398674 | 0.000687086 | 0.00158166 | 520 | 520 |
| SLC6A7   | 0.148396555 | 0.000687209 | 0.00158166 | 520 | 469 |
| FCGR3B   | 0.148385073 | 0.000687876 | 0.00158301 | 520 | 517 |
| ZNF652   | 0.148379282 | 0.000688213 | 0.0015836  | 520 | 520 |
| TDRD6    | 0.148329336 | 0.000691122 | 0.00159012 | 520 | 503 |
| ASH1L    | 0.148304117 | 0.000692596 | 0.00159333 | 520 | 520 |
| NRXN3    | 0.148282412 | 0.000693866 | 0.00159607 | 520 | 510 |
| PPYR1    | 0.148274896 | 0.000694306 | 0.0015969  | 520 | 505 |
| EID3     | 0.148266939 | 0.000694773 | 0.00159779 | 520 | 520 |
| ABCD1    | 0.148184995 | 0.000699594 | 0.00160869 | 520 | 520 |
| HOXD8    | 0.148112825 | 0.000703866 | 0.00161796 | 520 | 520 |
| ZFYVE16  | 0.148052541 | 0.000707453 | 0.00162602 | 520 | 520 |
| POU3F2   | 0.148044969 | 0.000707905 | 0.00162687 | 520 | 368 |
| CRYAB    | 0.147989139 | 0.000711244 | 0.00163417 | 520 | 520 |
| ZRANB3   | 0.147961463 | 0.000712904 | 0.00163743 | 520 | 520 |
| ZIK1     | 0.147846892 | 0.000719817 | 0.00165274 | 520 | 520 |
| WDR54    | 0.147790814 | 0.000723223 | 0.00166    | 520 | 520 |
| EXOC3L   | 0.147787444 | 0.000723428 | 0.00166028 | 520 | 520 |
| BBS4     | 0.147706591 | 0.000728366 | 0.00167091 | 520 | 520 |
| CCDC112  | 0.147695457 | 0.000729049 | 0.00167204 | 520 | 520 |
| ZMYM2    | 0.14768611  | 0.000729622 | 0.00167316 | 520 | 520 |
| UTP23    | 0.147649742 | 0.000731857 | 0.0016781  | 520 | 520 |
| ZNF253   | 0.147627271 | 0.000733241 | 0.00168108 | 520 | 517 |
| P2RX5    | 0.147619569 | 0.000733716 | 0.00168198 | 520 | 520 |
| KLHL8    | 0.147601601 | 0.000734826 | 0.00168414 | 520 | 520 |
| ERAP1    | 0.147508803 | 0.000740579 | 0.00169694 | 520 | 520 |
| TAGAP    | 0.147497345 | 0.000741292 | 0.00169838 | 520 | 520 |
| UXS1     | 0.147441672 | 0.000744767 | 0.00170614 | 520 | 520 |
| TAOK3    | 0.147435547 | 0.00074515  | 0.00170683 | 520 | 520 |
| FAM35A   | 0.147424807 | 0.000745822 | 0.00170817 | 520 | 520 |
| KIAA0652 | 0.147238066 | 0.000757603 | 0.00173437 | 520 | 520 |
| ZFP36L2  | 0.147231343 | 0.000758031 | 0.00173515 | 520 | 520 |
| NAT14    | 0.147219855 | 0.000758761 | 0.00173662 | 520 | 520 |
| ZKSCAN2  | 0.147216279 | 0.000758989 | 0.00173695 | 520 | 520 |
| CNTLN    | 0.147100085 | 0.000766419 | 0.00175335 | 520 | 520 |
| ICOS     | 0.147036585 | 0.000770507 | 0.00176191 | 520 | 520 |
| COL7A1   | 0.14701055  | 0.000772189 | 0.00176515 | 520 | 520 |
| ZNF710   | 0.146985235 | 0.000773828 | 0.0017687  | 520 | 520 |
| ANKFY1   | 0.146981838 | 0.000774048 | 0.00176886 | 520 | 520 |
| ZNF611   | 0.146963592 | 0.000775232 | 0.00177131 | 520 | 519 |
| KTN1     | 0.146959206 | 0.000775517 | 0.00177176 | 520 | 520 |
| ZSCAN12  | 0.146943171 | 0.000776559 | 0.00177394 | 520 | 519 |
| FUCA2    | 0.1469417   | 0.000776654 | 0.00177395 | 520 | 520 |
| PDLIM5   | 0.146910999 | 0.000778653 | 0.00177812 | 520 | 520 |

|            |             |             |            |     |     |
|------------|-------------|-------------|------------|-----|-----|
| CACNA2D2   | 0.146907231 | 0.000778899 | 0.00177847 | 520 | 519 |
| LMBRD2     | 0.146834764 | 0.000783637 | 0.00178909 | 520 | 520 |
| EEPD1      | 0.14679045  | 0.000786547 | 0.00179553 | 520 | 520 |
| GTF2I      | 0.146771907 | 0.000787768 | 0.00179771 | 520 | 520 |
| USP49      | 0.146676337 | 0.000794088 | 0.00181172 | 520 | 513 |
| SLC35D1    | 0.146645991 | 0.000796104 | 0.00181612 | 520 | 520 |
| KIAA1529   | 0.146570004 | 0.000801174 | 0.00182686 | 520 | 517 |
| SMARCC1    | 0.146527556 | 0.00080402  | 0.00183314 | 520 | 520 |
| CYLD       | 0.146451205 | 0.000809161 | 0.00184402 | 520 | 520 |
| MATN2      | 0.146411801 | 0.000811826 | 0.00184968 | 520 | 520 |
| ZNF460     | 0.146339298 | 0.000816752 | 0.00186069 | 520 | 520 |
| CES1       | 0.146328437 | 0.000817492 | 0.00186217 | 520 | 518 |
| ST7        | 0.146322485 | 0.000817898 | 0.00186288 | 520 | 520 |
| RNF125     | 0.146289929 | 0.000820122 | 0.00186731 | 520 | 520 |
| MTRR       | 0.146272859 | 0.00082129  | 0.00186976 | 520 | 520 |
| CECR2      | 0.146268159 | 0.000821611 | 0.00187028 | 520 | 515 |
| OR1L8      | 0.146100856 | 0.000833146 | 0.00189483 | 520 | 178 |
| HIPK1      | 0.146077828 | 0.000834745 | 0.00189782 | 520 | 520 |
| GAL3ST1    | 0.145935535 | 0.00084469  | 0.00191979 | 520 | 415 |
| MED14      | 0.145923117 | 0.000845564 | 0.00192155 | 520 | 520 |
| ZNF813     | 0.145908436 | 0.000846597 | 0.00192368 | 520 | 514 |
| SETD5      | 0.145891404 | 0.000847797 | 0.00192598 | 520 | 520 |
| ZNF559     | 0.145889628 | 0.000847922 | 0.00192605 | 520 | 520 |
| ZC3H6      | 0.145766028 | 0.000856681 | 0.00194506 | 520 | 520 |
| PSKH1      | 0.145726297 | 0.000859514 | 0.00195128 | 520 | 520 |
| SH3D19     | 0.145684165 | 0.000862528 | 0.00195746 | 520 | 520 |
| PPP1R3C    | 0.14567119  | 0.000863458 | 0.00195935 | 520 | 520 |
| ARNTL      | 0.145568683 | 0.000870839 | 0.00197498 | 520 | 520 |
| UBE2W      | 0.145545327 | 0.000872528 | 0.00197859 | 520 | 520 |
| FAM162B    | 0.14552807  | 0.000873779 | 0.00198098 | 520 | 513 |
| BAG4       | 0.145394111 | 0.000883543 | 0.00200244 | 520 | 520 |
| ZNF329     | 0.145388542 | 0.000883951 | 0.00200314 | 520 | 520 |
| AFF1       | 0.145329942 | 0.000888255 | 0.00201267 | 520 | 520 |
| SLC26A3    | 0.145309191 | 0.000889784 | 0.00201523 | 520 | 75  |
| ST6GALNAC6 | 0.145290561 | 0.000891159 | 0.00201812 | 520 | 520 |
| GNPDA2     | 0.145288082 | 0.000891342 | 0.00201831 | 520 | 520 |
| IQSEC2     | 0.145261385 | 0.000893316 | 0.00202209 | 520 | 520 |
| NAALAD2    | 0.145223372 | 0.000896133 | 0.00202785 | 520 | 517 |
| MON1B      | 0.145223005 | 0.00089616  | 0.00202785 | 520 | 520 |
| PRR12      | 0.145169452 | 0.000900144 | 0.00203641 | 520 | 520 |
| P2RX1      | 0.145168091 | 0.000900245 | 0.00203641 | 520 | 518 |
| RRN3       | 0.145132004 | 0.000902939 | 0.00204204 | 520 | 520 |
| MAGT1      | 0.14506564  | 0.000907912 | 0.00205283 | 520 | 520 |
| HIST2H2BA  | 0.145020158 | 0.000911335 | 0.00205964 | 520 | 512 |
| PALM3      | 0.145016251 | 0.000911629 | 0.00206008 | 520 | 501 |
| LOC154449  | 0.14500639  | 0.000912373 | 0.00206153 | 520 | 73  |

|           |             |             |            |     |     |
|-----------|-------------|-------------|------------|-----|-----|
| SYVN1     | 0.144978281 | 0.000914497 | 0.00206586 | 520 | 520 |
| ZSCAN4    | 0.144871404 | 0.000922613 | 0.00208257 | 520 | 363 |
| SULT1C2   | 0.144832139 | 0.000925611 | 0.0020891  | 520 | 423 |
| UGDH      | 0.144815908 | 0.000926853 | 0.0020912  | 520 | 520 |
| CEACAM4   | 0.144807557 | 0.000927493 | 0.00209194 | 520 | 512 |
| HMP19     | 0.144790729 | 0.000928783 | 0.00209438 | 520 | 353 |
| PCDHA2    | 0.144773055 | 0.00093014  | 0.00209721 | 520 | 248 |
| SF3B2     | 0.1447259   | 0.000933769 | 0.00210492 | 520 | 520 |
| PCDHA4    | 0.14472334  | 0.000933966 | 0.00210513 | 520 | 413 |
| PPM1F     | 0.144685584 | 0.000936882 | 0.00211147 | 520 | 520 |
| RAB6B     | 0.144671797 | 0.000937949 | 0.00211363 | 520 | 520 |
| CGRRF1    | 0.144664467 | 0.000938517 | 0.00211444 | 520 | 520 |
| ENTPD5    | 0.144628521 | 0.000941305 | 0.00212049 | 520 | 520 |
| SKAP2     | 0.14461368  | 0.000942458 | 0.00212285 | 520 | 520 |
| SOX18     | 0.144509975 | 0.000950555 | 0.00214085 | 520 | 520 |
| DUSP18    | 0.144502584 | 0.000951134 | 0.00214191 | 520 | 520 |
| BAGE2     | 0.144438423 | 0.000956178 | 0.00215212 | 520 | 459 |
| MRGPRE    | 0.144438144 | 0.0009562   | 0.00215212 | 520 | 146 |
| ZMPSTE24  | 0.144411345 | 0.000958314 | 0.00215664 | 520 | 520 |
| WRN       | 0.144390714 | 0.000959945 | 0.00215982 | 520 | 520 |
| PAIP1     | 0.144279171 | 0.000968805 | 0.00217806 | 520 | 520 |
| CLEC3B    | 0.144226203 | 0.000973039 | 0.00218733 | 520 | 520 |
| SOCS4     | 0.144175521 | 0.000977106 | 0.00219598 | 520 | 520 |
| UST       | 0.144127329 | 0.000980987 | 0.00220348 | 520 | 520 |
| CD36      | 0.14403818  | 0.000988206 | 0.0022192  | 520 | 520 |
| EMR3      | 0.1440212   | 0.000989586 | 0.00222205 | 520 | 494 |
| ISPD      | 0.143942013 | 0.000996047 | 0.00223606 | 520 | 520 |
| SERINC5   | 0.143939194 | 0.000996278 | 0.00223633 | 520 | 520 |
| HLA-DQB1  | 0.143919776 | 0.000997868 | 0.0022394  | 520 | 520 |
| C17orf70  | 0.143878272 | 0.001001276 | 0.0022468  | 520 | 520 |
| ADIPOQ    | 0.143842519 | 0.00100422  | 0.0022529  | 520 | 199 |
| PI4K2A    | 0.143836534 | 0.001004714 | 0.00225351 | 520 | 520 |
| KLK2      | 0.14382055  | 0.001006033 | 0.00225622 | 520 | 342 |
| KIAA0748  | 0.143789797 | 0.001008576 | 0.00226142 | 520 | 517 |
| LOC728875 | 0.143782121 | 0.001009212 | 0.00226259 | 520 | 520 |
| WAPAL     | 0.143712354 | 0.001015006 | 0.00227482 | 520 | 520 |
| ATP13A3   | 0.143705634 | 0.001015566 | 0.00227582 | 520 | 520 |
| ZNF828    | 0.143701937 | 0.001015874 | 0.00227626 | 520 | 520 |
| KIAA1632  | 0.143669362 | 0.001018592 | 0.0022821  | 520 | 520 |
| TGM4      | 0.143661147 | 0.001019279 | 0.00228338 | 520 | 507 |
| SNX13     | 0.143595029 | 0.00102482  | 0.00229478 | 520 | 520 |
| VIPAR     | 0.143516446 | 0.001031442 | 0.00230909 | 520 | 520 |
| TIGD4     | 0.143503488 | 0.001032538 | 0.00231103 | 520 | 488 |
| GVIN1     | 0.143462867 | 0.001035979 | 0.00231822 | 520 | 516 |
| ZFP36L1   | 0.143387278 | 0.001042412 | 0.00233132 | 520 | 520 |
| ZBTB1     | 0.143378859 | 0.001043131 | 0.00233241 | 520 | 520 |

|              |             |             |            |     |     |
|--------------|-------------|-------------|------------|-----|-----|
| STRN         | 0.143347282 | 0.001045831 | 0.00233819 | 520 | 520 |
| ROPN1L       | 0.143315454 | 0.001048559 | 0.00234403 | 520 | 493 |
| CRIP2        | 0.143307608 | 0.001049232 | 0.00234527 | 520 | 520 |
| SCD5         | 0.14327556  | 0.001051987 | 0.00235091 | 520 | 520 |
| ZNF548       | 0.143251876 | 0.001054028 | 0.00235521 | 520 | 520 |
| NCRNA00094   | 0.143219415 | 0.00105683  | 0.00236043 | 520 | 520 |
| FOXK1        | 0.143181352 | 0.001060125 | 0.00236752 | 520 | 520 |
| UGT3A2       | 0.143139865 | 0.001063727 | 0.00237451 | 520 | 423 |
| NCS1         | 0.143091009 | 0.001067983 | 0.00238322 | 520 | 520 |
| ZNF267       | 0.143081976 | 0.001068771 | 0.00238472 | 520 | 520 |
| PF4          | 0.143032548 | 0.001073096 | 0.00239384 | 520 | 227 |
| MEP1A        | 0.143014692 | 0.001074663 | 0.0023968  | 520 | 471 |
| BIVM         | 0.143012851 | 0.001074824 | 0.0023969  | 520 | 520 |
| LOC100128239 | 0.142994807 | 0.001076409 | 0.0023999  | 520 | 492 |
| ZNF318       | 0.14287266  | 0.001087197 | 0.00242342 | 520 | 520 |
| TIMD4        | 0.142865203 | 0.001087859 | 0.00242463 | 520 | 395 |
| DPF2         | 0.142826498 | 0.0010913   | 0.00243203 | 520 | 520 |
| DIAPH2       | 0.142810102 | 0.001092761 | 0.00243474 | 520 | 520 |
| HSP90AB1     | 0.142802462 | 0.001093442 | 0.00243599 | 520 | 520 |
| MOGS         | 0.142799793 | 0.00109368  | 0.00243625 | 520 | 520 |
| LARGE        | 0.142727595 | 0.001100138 | 0.00244983 | 520 | 520 |
| RSPO4        | 0.142675733 | 0.001104799 | 0.00245894 | 520 | 471 |
| R3HDM1       | 0.14266814  | 0.001105483 | 0.00245983 | 520 | 520 |
| NKX2-5       | 0.142645464 | 0.001107528 | 0.00246383 | 520 | 448 |
| LRTM1        | 0.142546108 | 0.001116529 | 0.00248331 | 520 | 198 |
| NPC1         | 0.142532954 | 0.001117725 | 0.0024857  | 520 | 520 |
| ACVR2B       | 0.142479685 | 0.001122583 | 0.0024954  | 520 | 520 |
| SIK1         | 0.142468086 | 0.001123644 | 0.00249721 | 520 | 520 |
| CTSG         | 0.142370143 | 0.001132635 | 0.00251663 | 520 | 513 |
| C7orf63      | 0.142365449 | 0.001133067 | 0.00251732 | 520 | 520 |
| ANKLE2       | 0.142278915 | 0.001141069 | 0.00253426 | 520 | 520 |
| ARL3         | 0.142243263 | 0.001144381 | 0.00254133 | 520 | 520 |
| SPEN         | 0.142236603 | 0.001145001 | 0.00254243 | 520 | 520 |
| GOLPH3       | 0.142198254 | 0.001148575 | 0.00255008 | 520 | 520 |
| RBM12        | 0.142190352 | 0.001149312 | 0.00255144 | 520 | 520 |
| USP42        | 0.142186088 | 0.001149711 | 0.00255199 | 520 | 520 |
| ARMC4        | 0.142146573 | 0.001153407 | 0.00255969 | 520 | 390 |
| GDF1         | 0.142140975 | 0.001153932 | 0.00256057 | 520 | 407 |
| FAM159A      | 0.142134416 | 0.001154547 | 0.00256165 | 520 | 509 |
| PRKCQ        | 0.142089522 | 0.001158764 | 0.00257013 | 520 | 520 |
| GNG10        | 0.142072916 | 0.001160328 | 0.00257228 | 520 | 520 |
| NPAS4        | 0.142058579 | 0.001161679 | 0.00257436 | 520 | 360 |
| EXOC5        | 0.14201036  | 0.001166235 | 0.00258417 | 520 | 520 |
| PIAS3        | 0.14195004  | 0.001171957 | 0.00259628 | 520 | 520 |
| CHRNA3       | 0.141890784 | 0.001177604 | 0.00260793 | 520 | 513 |
| BRD4         | 0.141826979 | 0.001183712 | 0.00262059 | 520 | 520 |

|           |             |             |            |     |     |
|-----------|-------------|-------------|------------|-----|-----|
| PPIC      | 0.14181765  | 0.001184608 | 0.00262229 | 520 | 520 |
| SLC5A4    | 0.14178829  | 0.00118743  | 0.00262825 | 520 | 424 |
| HOTAIR    | 0.14176167  | 0.001189994 | 0.00263306 | 520 | 472 |
| SNTA1     | 0.141697667 | 0.001196181 | 0.00264558 | 520 | 520 |
| ZNF470    | 0.141672692 | 0.001198603 | 0.00265065 | 520 | 519 |
| HPS3      | 0.141578067 | 0.001207821 | 0.00266945 | 520 | 520 |
| RNF112    | 0.141538857 | 0.001211659 | 0.00267718 | 520 | 516 |
| TAS2R31   | 0.141523527 | 0.001213163 | 0.00267991 | 520 | 365 |
| ZNF614    | 0.141520382 | 0.001213472 | 0.0026803  | 520 | 520 |
| EVL       | 0.141489692 | 0.001216489 | 0.00268667 | 520 | 520 |
| CXXC4     | 0.141475448 | 0.001217891 | 0.00268947 | 520 | 323 |
| ACP5      | 0.141419426 | 0.001223421 | 0.00270109 | 520 | 520 |
| HIAT1     | 0.141400361 | 0.001225308 | 0.00270496 | 520 | 520 |
| CFL1      | 0.14133185  | 0.001232112 | 0.00271876 | 520 | 520 |
| PTPN23    | 0.141276202 | 0.001237665 | 0.00272925 | 520 | 520 |
| LEFTY2    | 0.141272987 | 0.001237986 | 0.00272966 | 520 | 287 |
| MS4A2     | 0.141246954 | 0.001240592 | 0.00273505 | 520 | 510 |
| EIF3C     | 0.141245876 | 0.0012407   | 0.00273505 | 520 | 515 |
| LOC641298 | 0.141208636 | 0.001244437 | 0.00274239 | 520 | 513 |
| ABCG1     | 0.141192761 | 0.001246033 | 0.0027456  | 520 | 520 |
| CNTN1     | 0.141081735 | 0.001257249 | 0.00276911 | 520 | 517 |
| RLF       | 0.141068661 | 0.001258576 | 0.00277173 | 520 | 520 |
| CHRNA7    | 0.141028243 | 0.001262686 | 0.00277956 | 520 | 471 |
| RERGL     | 0.141024446 | 0.001263072 | 0.00278011 | 520 | 376 |
| C15orf57  | 0.141020341 | 0.001263491 | 0.00278073 | 520 | 520 |
| ERBB4     | 0.140992725 | 0.001266307 | 0.00278662 | 520 | 403 |
| MYT1      | 0.140983743 | 0.001267225 | 0.00278834 | 520 | 451 |
| RAB34     | 0.140931558 | 0.001272567 | 0.00279948 | 520 | 520 |
| TAGLN3    | 0.14091041  | 0.001274738 | 0.00280395 | 520 | 481 |
| SLC36A2   | 0.140907895 | 0.001274997 | 0.00280421 | 520 | 298 |
| C2orf70   | 0.140873689 | 0.001278516 | 0.00281103 | 520 | 335 |
| TRIML2    | 0.140872016 | 0.001278688 | 0.00281111 | 520 | 436 |
| DYM       | 0.140835084 | 0.001282498 | 0.00281887 | 520 | 520 |
| NUMB      | 0.140803194 | 0.001285797 | 0.00282581 | 520 | 520 |
| ARHGAP15  | 0.140786927 | 0.001287482 | 0.00282921 | 520 | 520 |
| SFRP1     | 0.140719178 | 0.001294524 | 0.00284282 | 520 | 520 |
| GPR1      | 0.140546077 | 0.001312678 | 0.0028808  | 520 | 518 |
| C5orf32   | 0.140432776 | 0.001324686 | 0.00290513 | 520 | 520 |
| MEGF6     | 0.140412992 | 0.001326793 | 0.00290925 | 520 | 520 |
| ELF1      | 0.140377757 | 0.001330554 | 0.00291718 | 520 | 520 |
| ZDHHC1    | 0.140281711 | 0.001340855 | 0.00293912 | 520 | 520 |
| TMC7      | 0.140222761 | 0.001347213 | 0.00295178 | 520 | 520 |
| BOP1      | 0.140182158 | 0.001351609 | 0.00296012 | 520 | 520 |
| ARHGEF18  | 0.14016634  | 0.001353325 | 0.00296356 | 520 | 520 |
| IL1RAP    | 0.140126968 | 0.001357605 | 0.00297228 | 520 | 520 |
| MKLN1     | 0.140122351 | 0.001358107 | 0.00297306 | 520 | 520 |



|           |             |             |            |     |     |
|-----------|-------------|-------------|------------|-----|-----|
| ADCY6     | 0.140104456 | 0.001360057 | 0.00297701 | 520 | 520 |
| FAM106A   | 0.140099106 | 0.001360641 | 0.00297796 | 520 | 354 |
| CDK2AP1   | 0.140018925 | 0.001369414 | 0.00299586 | 520 | 520 |
| GOLGA4    | 0.13999211  | 0.001372359 | 0.00300133 | 520 | 520 |
| OR2B11    | 0.139982936 | 0.001373368 | 0.00300321 | 520 | 139 |
| ZNF229    | 0.13996172  | 0.001375704 | 0.00300734 | 520 | 514 |
| ZFP2      | 0.139951342 | 0.001376848 | 0.00300951 | 520 | 512 |
| NTF3      | 0.139913343 | 0.001381045 | 0.00301771 | 520 | 505 |
| HLA-DRA   | 0.139884281 | 0.001384262 | 0.00302408 | 520 | 520 |
| KIAA1908  | 0.13986724  | 0.001386152 | 0.00302788 | 520 | 520 |
| ACTN4     | 0.139865    | 0.001386401 | 0.0030281  | 520 | 520 |
| CALR      | 0.139841496 | 0.001389011 | 0.00303347 | 520 | 520 |
| LARS2     | 0.139827663 | 0.00139055  | 0.0030365  | 520 | 520 |
| ZNF227    | 0.139802603 | 0.001393342 | 0.00304131 | 520 | 520 |
| IFT140    | 0.139801142 | 0.001393505 | 0.00304131 | 520 | 520 |
| FGF9      | 0.139774615 | 0.001396465 | 0.00304678 | 520 | 466 |
| APOC4     | 0.139718664 | 0.001402729 | 0.00306011 | 520 | 256 |
| ACSL3     | 0.13970777  | 0.001403952 | 0.00306245 | 520 | 520 |
| FAM21A    | 0.139554066 | 0.001421307 | 0.00309796 | 520 | 514 |
| ACER2     | 0.139508161 | 0.001426529 | 0.00310833 | 520 | 517 |
| SYT9      | 0.139402534 | 0.00143861  | 0.0031333  | 520 | 306 |
| PPP1R16B  | 0.139384984 | 0.001440627 | 0.00313702 | 520 | 520 |
| LRIG2     | 0.139304396 | 0.001449919 | 0.00315691 | 520 | 520 |
| MAP4K5    | 0.139266136 | 0.00145435  | 0.00316588 | 520 | 520 |
| PRL       | 0.139225903 | 0.001459023 | 0.00317536 | 520 | 174 |
| RBM12B    | 0.139207946 | 0.001461113 | 0.00317923 | 520 | 520 |
| LOC728989 | 0.139195897 | 0.001462517 | 0.00318159 | 520 | 442 |
| SLC31A2   | 0.139192576 | 0.001462904 | 0.00318209 | 520 | 520 |
| LOC221122 | 0.139186553 | 0.001463607 | 0.00318328 | 520 | 51  |
| PATL1     | 0.139110541 | 0.001472499 | 0.00320158 | 520 | 520 |
| MAF       | 0.139089532 | 0.001474965 | 0.00320637 | 520 | 520 |
| TBC1D12   | 0.139053748 | 0.001479175 | 0.00321471 | 520 | 520 |
| CCL22     | 0.139050651 | 0.001479539 | 0.00321516 | 520 | 520 |
| RNFT1     | 0.139031874 | 0.001481753 | 0.00321962 | 520 | 520 |
| OCRL      | 0.139026344 | 0.001482406 | 0.00322069 | 520 | 520 |
| CLEC18A   | 0.138966922 | 0.001489435 | 0.0032347  | 520 | 519 |
| MT2A      | 0.138961714 | 0.001490052 | 0.00323556 | 520 | 520 |
| NIPBL     | 0.138898798 | 0.001497531 | 0.00325075 | 520 | 520 |
| OBSCN     | 0.13886144  | 0.001501987 | 0.00326007 | 520 | 520 |
| TMEM155   | 0.138782398 | 0.001511457 | 0.00327992 | 520 | 494 |
| FOXC1     | 0.138768391 | 0.001513141 | 0.00328287 | 520 | 520 |
| TXLNG     | 0.138761924 | 0.001513919 | 0.0032842  | 520 | 520 |
| RRAGA     | 0.138733162 | 0.001517384 | 0.00329136 | 520 | 520 |
| ZNF41     | 0.138705839 | 0.001520682 | 0.00329816 | 520 | 520 |
| C15orf33  | 0.13868621  | 0.001523055 | 0.0033026  | 520 | 518 |
| VIPR2     | 0.138679395 | 0.00152388  | 0.00330403 | 520 | 468 |

|           |             |             |            |     |     |
|-----------|-------------|-------------|------------|-----|-----|
| FIBCD1    | 0.138673255 | 0.001524623 | 0.00330529 | 520 | 511 |
| SIX3      | 0.138665435 | 0.001525571 | 0.00330663 | 520 | 332 |
| NDST2     | 0.138644704 | 0.001528085 | 0.00331137 | 520 | 520 |
| PM20D1    | 0.138603664 | 0.001533073 | 0.00332111 | 520 | 365 |
| NPFFR1    | 0.13858378  | 0.001535495 | 0.003326   | 520 | 299 |
| SOST      | 0.138532352 | 0.001541777 | 0.00333817 | 520 | 493 |
| MIER1     | 0.138468859 | 0.001549564 | 0.00335431 | 520 | 520 |
| ZMYND12   | 0.138439187 | 0.001553216 | 0.00336185 | 520 | 508 |
| C6        | 0.138431169 | 0.001554204 | 0.00336292 | 520 | 241 |
| BTBD1     | 0.138419412 | 0.001555654 | 0.00336515 | 520 | 520 |
| ASB18     | 0.138418712 | 0.00155574  | 0.00336515 | 520 | 83  |
| EPM2A     | 0.138379869 | 0.001560539 | 0.00337481 | 520 | 520 |
| KCNQ1OT1  | 0.138296919 | 0.001570834 | 0.00339598 | 520 | 519 |
| GPC3      | 0.138287033 | 0.001572065 | 0.00339828 | 520 | 519 |
| TROVE2    | 0.138244895 | 0.001577322 | 0.00340845 | 520 | 520 |
| PLEKHA4   | 0.138227715 | 0.00157947  | 0.00341209 | 520 | 520 |
| SLC5A3    | 0.138197479 | 0.001583257 | 0.00341954 | 520 | 520 |
| LNP1      | 0.13813501  | 0.001591108 | 0.00343539 | 520 | 520 |
| CSDE1     | 0.138093475 | 0.001596347 | 0.00344523 | 520 | 520 |
| DEGS1     | 0.138086637 | 0.001597211 | 0.00344672 | 520 | 520 |
| SMARCAL1  | 0.13802865  | 0.001604556 | 0.0034622  | 520 | 520 |
| DNAJC14   | 0.138018952 | 0.001605787 | 0.00346404 | 520 | 520 |
| CRAT      | 0.13801787  | 0.001605925 | 0.00346404 | 520 | 520 |
| GMFG      | 0.13797188  | 0.001611777 | 0.00347605 | 520 | 520 |
| MMP21     | 0.137833049 | 0.001629561 | 0.0035124  | 520 | 208 |
| CCK       | 0.137830745 | 0.001629858 | 0.00351266 | 520 | 372 |
| PCDHB17   | 0.137810858 | 0.00163242  | 0.00351781 | 520 | 472 |
| STXBP4    | 0.137806177 | 0.001633024 | 0.00351873 | 520 | 520 |
| ARID3A    | 0.137804111 | 0.001633291 | 0.00351893 | 520 | 520 |
| TNKS2     | 0.137801313 | 0.001633652 | 0.00351933 | 520 | 520 |
| AP3B1     | 0.137786501 | 0.001635564 | 0.00352308 | 520 | 520 |
| NRAS      | 0.137769303 | 0.001637787 | 0.00352749 | 520 | 520 |
| CELSR1    | 0.137731413 | 0.001642695 | 0.00353768 | 520 | 520 |
| GRB14     | 0.137722082 | 0.001643905 | 0.00353991 | 520 | 503 |
| ANLN      | 0.137695342 | 0.001647379 | 0.00354663 | 520 | 520 |
| TSHR      | 0.137604132 | 0.001659279 | 0.00357187 | 520 | 435 |
| LOC442308 | 0.13745176  | 0.001679335 | 0.00361311 | 520 | 420 |
| ITPRIP    | 0.13744972  | 0.001679605 | 0.00361331 | 520 | 520 |
| TMCC3     | 0.137385228 | 0.001688161 | 0.00363017 | 520 | 520 |
| BAT2L1    | 0.137372973 | 0.001689792 | 0.00363329 | 520 | 520 |
| DPH3      | 0.137329023 | 0.001695651 | 0.0036455  | 520 | 520 |
| SLC35E3   | 0.137261469 | 0.001704693 | 0.00366298 | 520 | 520 |
| TESK1     | 0.137257993 | 0.00170516  | 0.0036636  | 520 | 520 |
| ARMCX6    | 0.13725493  | 0.001705571 | 0.00366409 | 520 | 519 |
| ZSWIM6    | 0.13722767  | 0.001709234 | 0.00367157 | 520 | 520 |
| PCBP4     | 0.137181535 | 0.00171545  | 0.00368453 | 520 | 520 |

|           |             |             |            |     |     |
|-----------|-------------|-------------|------------|-----|-----|
| C1orf88   | 0.137162429 | 0.00171803  | 0.00368968 | 520 | 515 |
| DOK7      | 0.13714918  | 0.001719822 | 0.00369313 | 520 | 517 |
| ZNF74     | 0.137142594 | 0.001720713 | 0.00369465 | 520 | 520 |
| PMP2      | 0.137098725 | 0.001726659 | 0.00370544 | 520 | 399 |
| ASB14     | 0.137077943 | 0.001729483 | 0.00371111 | 520 | 519 |
| ATP6AP1   | 0.137030942 | 0.001735884 | 0.00372366 | 520 | 520 |
| CCNA1     | 0.137021146 | 0.001737221 | 0.00372613 | 520 | 512 |
| SGCZ      | 0.1369817   | 0.001742614 | 0.0037369  | 520 | 135 |
| DPEP1     | 0.136956277 | 0.001746099 | 0.00374397 | 520 | 481 |
| KCND3     | 0.136925464 | 0.00175033  | 0.00375211 | 520 | 513 |
| 10-Sep    | 0.136897908 | 0.001754122 | 0.00375878 | 520 | 520 |
| DCAF7     | 0.136805032 | 0.001766958 | 0.00378508 | 520 | 520 |
| PLD4      | 0.136797486 | 0.001768004 | 0.00378651 | 520 | 519 |
| SSX5      | 0.136632446 | 0.001791039 | 0.00383158 | 520 | 82  |
| DNAJC13   | 0.136595195 | 0.001796276 | 0.00384217 | 520 | 520 |
| C10orf118 | 0.136506537 | 0.001808797 | 0.00386731 | 520 | 520 |
| DDX24     | 0.136491754 | 0.001810892 | 0.00387138 | 520 | 520 |
| CLASP2    | 0.136405431 | 0.001823173 | 0.00389433 | 520 | 520 |
| WDR44     | 0.136402066 | 0.001823653 | 0.00389494 | 520 | 520 |
| PCYOX1    | 0.136381946 | 0.001826527 | 0.00390067 | 520 | 520 |
| SSR2      | 0.136352585 | 0.001830729 | 0.00390922 | 520 | 520 |
| PCDH20    | 0.136335677 | 0.001833152 | 0.00391399 | 520 | 429 |
| MECOM     | 0.13631782  | 0.001835715 | 0.00391904 | 520 | 520 |
| KPNA6     | 0.136225574 | 0.001849006 | 0.00394596 | 520 | 520 |
| TRPC2     | 0.136219032 | 0.001849952 | 0.00394732 | 520 | 346 |
| OTOF      | 0.136217765 | 0.001850135 | 0.00394732 | 520 | 513 |
| GPBAR1    | 0.136208057 | 0.001851539 | 0.0039499  | 520 | 520 |
| CLCF1     | 0.136132378 | 0.001862523 | 0.00397165 | 520 | 520 |
| SIN3B     | 0.136084386 | 0.001869519 | 0.00398539 | 520 | 520 |
| CCNJ      | 0.136084089 | 0.001869562 | 0.00398539 | 520 | 520 |
| C1GALT1   | 0.136040493 | 0.001875938 | 0.00399856 | 520 | 520 |
| HUNK      | 0.136029066 | 0.001877613 | 0.00400138 | 520 | 520 |
| TMSL3     | 0.136014555 | 0.001879742 | 0.00400498 | 520 | 520 |
| ALAS2     | 0.135976224 | 0.001885374 | 0.00401613 | 520 | 343 |
| MED15     | 0.135871935 | 0.001900779 | 0.00404681 | 520 | 520 |
| RD3       | 0.135708402 | 0.001925167 | 0.00409657 | 520 | 332 |
| EPC1      | 0.135694671 | 0.001927227 | 0.00410052 | 520 | 520 |
| SEMA3E    | 0.135672209 | 0.001930603 | 0.00410683 | 520 | 377 |
| KIAA1704  | 0.135650846 | 0.001933818 | 0.00411324 | 520 | 520 |
| LOC285830 | 0.135606422 | 0.001940519 | 0.00412706 | 520 | 520 |
| PROK2     | 0.135559509 | 0.00194762  | 0.00414128 | 520 | 469 |
| SUN1      | 0.135483496 | 0.001959175 | 0.00416498 | 520 | 520 |
| NFIX      | 0.135474655 | 0.001960523 | 0.00416696 | 520 | 520 |
| SOS1      | 0.135467115 | 0.001961673 | 0.00416853 | 520 | 520 |
| DGCR2     | 0.135448423 | 0.001964527 | 0.00417415 | 520 | 520 |
| OLIG2     | 0.135443332 | 0.001965305 | 0.00417537 | 520 | 283 |

|          |             |             |            |     |     |
|----------|-------------|-------------|------------|-----|-----|
| SLC37A2  | 0.135431044 | 0.001967185 | 0.00417892 | 520 | 520 |
| TANK     | 0.135383415 | 0.001974484 | 0.00419266 | 520 | 520 |
| FAM134A  | 0.135348762 | 0.00197981  | 0.00420308 | 520 | 520 |
| CAPZB    | 0.135274778 | 0.001991226 | 0.00422598 | 520 | 520 |
| ATG4C    | 0.135184866 | 0.00200518  | 0.00425426 | 520 | 520 |
| HLA-DPB2 | 0.135181925 | 0.002005638 | 0.00425461 | 520 | 486 |
| MATK     | 0.135176777 | 0.00200644  | 0.00425559 | 520 | 520 |
| TNKS     | 0.135135498 | 0.002012881 | 0.00426835 | 520 | 520 |
| CEP97    | 0.135092571 | 0.002019598 | 0.00428169 | 520 | 520 |
| VPS26B   | 0.135089071 | 0.002020147 | 0.0042824  | 520 | 520 |
| CEP135   | 0.135053687 | 0.0020257   | 0.00429328 | 520 | 520 |
| TMEM185B | 0.13503888  | 0.002028028 | 0.00429731 | 520 | 520 |
| DPPA2    | 0.135027916 | 0.002029754 | 0.00430051 | 520 | 168 |
| IFIT2    | 0.135017265 | 0.002031432 | 0.00430361 | 520 | 520 |
| KIAA0494 | 0.135014648 | 0.002031844 | 0.00430403 | 520 | 520 |
| PPP2R5B  | 0.134994955 | 0.00203495  | 0.00430971 | 520 | 520 |
| SRRD     | 0.134968401 | 0.002039144 | 0.00431814 | 520 | 520 |
| PHF2     | 0.134954038 | 0.002041416 | 0.00432204 | 520 | 520 |
| SLC9A1   | 0.134949248 | 0.002042174 | 0.00432319 | 520 | 520 |
| HPGDS    | 0.134942647 | 0.00204322  | 0.0043245  | 520 | 517 |
| YIF1A    | 0.134934138 | 0.002044568 | 0.0043269  | 520 | 520 |
| SLC39A9  | 0.134863806 | 0.002055743 | 0.00434886 | 520 | 520 |
| EIF2C4   | 0.134831617 | 0.002060876 | 0.00435912 | 520 | 520 |
| C22orf34 | 0.134813734 | 0.002063733 | 0.00436425 | 520 | 405 |
| CACNA1A  | 0.134725942 | 0.00207781  | 0.00439264 | 520 | 518 |
| ATCAY    | 0.134638525 | 0.002091915 | 0.00442106 | 520 | 288 |
| PFN2     | 0.134629304 | 0.002093408 | 0.00442376 | 520 | 520 |
| RBL2     | 0.134572037 | 0.002102701 | 0.00444246 | 520 | 520 |
| GNB3     | 0.134465694 | 0.002120059 | 0.00447679 | 520 | 513 |
| C14orf50 | 0.134463333 | 0.002120446 | 0.00447714 | 520 | 515 |
| PDE8A    | 0.134446903 | 0.00212314  | 0.00448142 | 520 | 520 |
| CHST7    | 0.134442386 | 0.002123881 | 0.00448251 | 520 | 520 |
| SUMO4    | 0.134425575 | 0.002126641 | 0.00448787 | 520 | 444 |
| KLF6     | 0.134324154 | 0.002143365 | 0.00452127 | 520 | 520 |
| CFHR3    | 0.134284664 | 0.002149909 | 0.0045346  | 520 | 483 |
| MUL1     | 0.134272202 | 0.002151978 | 0.00453849 | 520 | 520 |
| APOBEC3C | 0.134267406 | 0.002152775 | 0.00453969 | 520 | 520 |
| ZNF236   | 0.134227661 | 0.002159387 | 0.00455316 | 520 | 520 |
| PPM1E    | 0.134143257 | 0.002173492 | 0.00458146 | 520 | 515 |
| HOXA11   | 0.134140387 | 0.002173973 | 0.004582   | 520 | 507 |
| KLHDC8A  | 0.13407775  | 0.002184497 | 0.00460322 | 520 | 511 |
| AGFG1    | 0.134071142 | 0.00218561  | 0.0046046  | 520 | 520 |
| NR4A1    | 0.134055611 | 0.002188228 | 0.00460963 | 520 | 520 |
| C2orf88  | 0.134034474 | 0.002191795 | 0.00461667 | 520 | 519 |
| CASKIN2  | 0.134025437 | 0.002193322 | 0.0046194  | 520 | 520 |
| ZNF143   | 0.133998812 | 0.002197826 | 0.0046284  | 520 | 520 |

|              |             |             |            |     |     |
|--------------|-------------|-------------|------------|-----|-----|
| C17orf47     | 0.133960653 | 0.002204296 | 0.00464009 | 520 | 409 |
| TMEM135      | 0.133933004 | 0.002208995 | 0.00464901 | 520 | 520 |
| C6orf105     | 0.133918565 | 0.002211452 | 0.00465273 | 520 | 519 |
| DRD5         | 0.133888504 | 0.002216576 | 0.00466253 | 520 | 447 |
| GADD45G      | 0.133847467 | 0.002223589 | 0.00467631 | 520 | 520 |
| EPST11       | 0.133781743 | 0.002234863 | 0.00469757 | 520 | 520 |
| TUG1         | 0.133769396 | 0.002236987 | 0.00470154 | 520 | 520 |
| BCL8         | 0.133764131 | 0.002237893 | 0.00470296 | 520 | 444 |
| RYR3         | 0.133759197 | 0.002238742 | 0.00470425 | 520 | 519 |
| ADRA2C       | 0.133738797 | 0.002242258 | 0.00471115 | 520 | 520 |
| F3           | 0.133737019 | 0.002242564 | 0.00471113 | 520 | 520 |
| UBR4         | 0.133715603 | 0.002246261 | 0.0047171  | 520 | 520 |
| ZNF526       | 0.133623854 | 0.00226216  | 0.004749   | 520 | 520 |
| DNER         | 0.133600731 | 0.002266183 | 0.00475695 | 520 | 516 |
| MTSS1        | 0.133559961 | 0.002273292 | 0.00477039 | 520 | 520 |
| SLC6A11      | 0.133555334 | 0.0022741   | 0.00477109 | 520 | 499 |
| CRTC1        | 0.133398327 | 0.002301678 | 0.00482493 | 520 | 520 |
| CAMK2D       | 0.133350738 | 0.002310098 | 0.00484158 | 520 | 520 |
| SLC35E2      | 0.133341843 | 0.002311674 | 0.00484387 | 520 | 520 |
| DDX19B       | 0.133333156 | 0.002313215 | 0.0048466  | 520 | 520 |
| MED23        | 0.13328523  | 0.002321733 | 0.00486343 | 520 | 520 |
| TDRD1        | 0.133283464 | 0.002322047 | 0.00486359 | 520 | 437 |
| PABPC3       | 0.133217573 | 0.002333806 | 0.00488669 | 520 | 520 |
| DYNC1LI1     | 0.13315683  | 0.002344694 | 0.00490847 | 520 | 520 |
| IL27         | 0.13314264  | 0.002347244 | 0.00491279 | 520 | 403 |
| GALNT9       | 0.133093431 | 0.002356108 | 0.00493032 | 520 | 370 |
| LOC100129550 | 0.133047658 | 0.00236438  | 0.00494609 | 520 | 520 |
| CALN1        | 0.133026114 | 0.002368282 | 0.00495374 | 520 | 400 |
| PTAFR        | 0.133009478 | 0.0023713   | 0.00495954 | 520 | 520 |
| KIAA0562     | 0.132982134 | 0.002376267 | 0.00496889 | 520 | 520 |
| EIF2C1       | 0.132968032 | 0.002378832 | 0.00497374 | 520 | 520 |
| PRKRIR       | 0.132913377 | 0.0023888   | 0.00499355 | 520 | 520 |
| TMEM123      | 0.132890527 | 0.002392978 | 0.00500174 | 520 | 520 |
| CORO7        | 0.132889233 | 0.002393215 | 0.00500174 | 520 | 520 |
| CAND1        | 0.132861386 | 0.002398316 | 0.0050118  | 520 | 520 |
| SAR1A        | 0.132853197 | 0.002399818 | 0.00501398 | 520 | 520 |
| UBE2Q2       | 0.132811177 | 0.002407539 | 0.00502959 | 520 | 520 |
| GATSL2       | 0.132799258 | 0.002409734 | 0.00503365 | 520 | 389 |
| ITPKB        | 0.132772865 | 0.002414599 | 0.0050423  | 520 | 520 |
| KALRN        | 0.132772327 | 0.002414698 | 0.0050423  | 520 | 520 |
| GJC2         | 0.132771377 | 0.002414874 | 0.0050423  | 520 | 520 |
| WDR63        | 0.132746045 | 0.002419552 | 0.00505102 | 520 | 501 |
| SIPA1L3      | 0.132712144 | 0.002425826 | 0.00506307 | 520 | 520 |
| HCG11        | 0.132709179 | 0.002426376 | 0.00506369 | 520 | 520 |
| RALGAPA2     | 0.132676575 | 0.002432425 | 0.00507422 | 520 | 520 |
| CISH         | 0.132673471 | 0.002433002 | 0.0050749  | 520 | 520 |

|          |             |             |            |     |     |
|----------|-------------|-------------|------------|-----|-----|
| KCNH3    | 0.13261555  | 0.002443785 | 0.00509634 | 520 | 518 |
| PTP4A1   | 0.132589789 | 0.002448595 | 0.00510584 | 520 | 520 |
| KCTD8    | 0.132552854 | 0.002455506 | 0.00511972 | 520 | 239 |
| VPS39    | 0.13255021  | 0.002456002 | 0.00512023 | 520 | 520 |
| IPO9     | 0.132467166 | 0.002471609 | 0.0051517  | 520 | 520 |
| CSDAP1   | 0.13240684  | 0.002483004 | 0.00517491 | 520 | 520 |
| DKK1     | 0.132398991 | 0.00248449  | 0.00517748 | 520 | 516 |
| PLXNB2   | 0.132361254 | 0.002491646 | 0.00519131 | 520 | 520 |
| PPP4R1L  | 0.132247706 | 0.002513291 | 0.00523533 | 520 | 520 |
| WIZ      | 0.132193525 | 0.00252368  | 0.00525643 | 520 | 520 |
| FAM45B   | 0.132061766 | 0.002549107 | 0.00530774 | 520 | 520 |
| KIAA0586 | 0.132056616 | 0.002550105 | 0.00530927 | 520 | 520 |
| PRKG2    | 0.132047662 | 0.002551843 | 0.00531148 | 520 | 512 |
| ZC3H10   | 0.132017018 | 0.002557796 | 0.00532309 | 520 | 520 |
| ZNF407   | 0.131994039 | 0.002562268 | 0.00533129 | 520 | 520 |
| CGGBP1   | 0.131971457 | 0.00256667  | 0.00533853 | 520 | 520 |
| ZNF451   | 0.131970773 | 0.002566803 | 0.00533853 | 520 | 520 |
| AQPEP    | 0.131933727 | 0.00257404  | 0.00535192 | 520 | 507 |
| WNT6     | 0.131888255 | 0.002582948 | 0.00536712 | 520 | 517 |
| OTUD4    | 0.131882371 | 0.002584103 | 0.00536897 | 520 | 520 |
| HLA-DRB1 | 0.131856272 | 0.002589231 | 0.00537907 | 520 | 520 |
| ERBB2IP  | 0.131804496 | 0.00259943  | 0.00539801 | 520 | 520 |
| LIX1     | 0.131774321 | 0.002605392 | 0.0054093  | 520 | 355 |
| CMAH     | 0.131648731 | 0.002630337 | 0.0054594  | 520 | 520 |
| CLEC4C   | 0.131641932 | 0.002631694 | 0.00546166 | 520 | 327 |
| GXYLT1   | 0.131637514 | 0.002632576 | 0.00546293 | 520 | 520 |
| MXD4     | 0.131616772 | 0.00263672  | 0.0054704  | 520 | 520 |
| TCF3     | 0.13149857  | 0.002660449 | 0.00551736 | 520 | 520 |
| SHISA6   | 0.131468234 | 0.00266657  | 0.00552835 | 520 | 356 |
| DIAPH3   | 0.131450282 | 0.002670199 | 0.0055353  | 520 | 520 |
| ZNF599   | 0.131343408 | 0.002691893 | 0.00557682 | 520 | 520 |
| SYT1     | 0.131288993 | 0.002703001 | 0.00559812 | 520 | 513 |
| PTP4A2   | 0.131246485 | 0.002711706 | 0.005615   | 520 | 520 |
| UCN2     | 0.131221572 | 0.002716821 | 0.00562501 | 520 | 520 |
| MYST2    | 0.131191759 | 0.002722952 | 0.00563713 | 520 | 520 |
| KCNJ12   | 0.131173312 | 0.002726753 | 0.00564326 | 520 | 520 |
| FGF13    | 0.131128602 | 0.002735983 | 0.0056612  | 520 | 517 |
| TTLL1    | 0.131051743 | 0.002751919 | 0.00569183 | 520 | 520 |
| GRIK4    | 0.131043584 | 0.002753615 | 0.00569476 | 520 | 463 |
| KCNE1    | 0.131032685 | 0.002755883 | 0.0056979  | 520 | 503 |
| LRRFIP1  | 0.131032213 | 0.002755981 | 0.0056979  | 520 | 520 |
| ZNF675   | 0.130938182 | 0.002775617 | 0.00573673 | 520 | 520 |
| LRIG3    | 0.130827448 | 0.002798905 | 0.00578309 | 520 | 520 |
| OVCH2    | 0.130790746 | 0.002806663 | 0.00579674 | 520 | 263 |
| DIDO1    | 0.130775762 | 0.002809836 | 0.0058021  | 520 | 520 |
| CTTNBP2  | 0.130720487 | 0.002821569 | 0.00582394 | 520 | 510 |

|          |             |             |            |     |     |
|----------|-------------|-------------|------------|-----|-----|
| WWP1     | 0.130683703 | 0.002829401 | 0.00583951 | 520 | 520 |
| PHACTR3  | 0.130603203 | 0.002846611 | 0.00587383 | 520 | 508 |
| PATZ1    | 0.1305679   | 0.002854188 | 0.00588826 | 520 | 520 |
| SPATS2   | 0.130486811 | 0.002871663 | 0.0059237  | 520 | 520 |
| ADCY3    | 0.130435086 | 0.00288286  | 0.00594619 | 520 | 520 |
| GHDC     | 0.130426617 | 0.002884697 | 0.00594937 | 520 | 520 |
| ZDHC22   | 0.130367475 | 0.002897557 | 0.00597345 | 520 | 296 |
| SCARB1   | 0.130360168 | 0.002899149 | 0.00597612 | 520 | 520 |
| SLC43A3  | 0.130327921 | 0.002906186 | 0.00599002 | 520 | 520 |
| DHX40    | 0.130282679 | 0.002916085 | 0.00600919 | 520 | 520 |
| SLC4A8   | 0.130273006 | 0.002918205 | 0.00601295 | 520 | 519 |
| OS9      | 0.130263557 | 0.002920278 | 0.0060166  | 520 | 520 |
| TCTA     | 0.130257903 | 0.002921519 | 0.00601854 | 520 | 520 |
| AHCYL1   | 0.130210651 | 0.002931908 | 0.00603871 | 520 | 520 |
| C19orf10 | 0.13010093  | 0.002956161 | 0.00608501 | 520 | 520 |
| MPP6     | 0.130100773 | 0.002956196 | 0.00608501 | 520 | 520 |
| DCAF17   | 0.13004789  | 0.002967951 | 0.00610733 | 520 | 520 |
| KIF19    | 0.13004622  | 0.002968322 | 0.0061074  | 520 | 513 |
| TRMT12   | 0.130045033 | 0.002968587 | 0.0061074  | 520 | 520 |
| GATA1    | 0.130013203 | 0.002975684 | 0.00612075 | 520 | 419 |
| MGC16384 | 0.129944725 | 0.002991004 | 0.00615038 | 520 | 472 |
| SLFN12L  | 0.129942314 | 0.002991545 | 0.00615086 | 520 | 518 |
| STAG1    | 0.129812529 | 0.003020784 | 0.00620908 | 520 | 520 |
| WNT9A    | 0.129780521 | 0.003028035 | 0.00622335 | 520 | 520 |
| KIAA1147 | 0.129768059 | 0.003030862 | 0.00622853 | 520 | 520 |
| MAMLD1   | 0.129740034 | 0.003037229 | 0.00624034 | 520 | 520 |
| FREM1    | 0.129731303 | 0.003039215 | 0.00624378 | 520 | 508 |
| PLK1S1   | 0.129661037 | 0.003055241 | 0.00627607 | 520 | 520 |
| CA5B     | 0.12956344  | 0.003077629 | 0.00632013 | 520 | 520 |
| SMARCB1  | 0.129524034 | 0.003086711 | 0.00633748 | 520 | 520 |
| HERC2    | 0.129507879 | 0.003090441 | 0.00634438 | 520 | 520 |
| PCDHA11  | 0.129506762 | 0.003090699 | 0.00634438 | 520 | 228 |
| KIAA1432 | 0.129361392 | 0.003124452 | 0.00641106 | 520 | 520 |
| OVCH1    | 0.12932051  | 0.003134004 | 0.00642935 | 520 | 199 |
| CCL8     | 0.129289587 | 0.003141247 | 0.00644326 | 520 | 518 |
| FAM98A   | 0.12922812  | 0.003155689 | 0.00647186 | 520 | 520 |
| CGREF1   | 0.129207893 | 0.003160455 | 0.00648032 | 520 | 520 |
| KCNB2    | 0.129043319 | 0.003199475 | 0.00655432 | 520 | 355 |
| TLE2     | 0.12901418  | 0.003206429 | 0.00656724 | 520 | 520 |
| RFPL4B   | 0.12898536  | 0.003213321 | 0.00658001 | 520 | 230 |
| KIAA1267 | 0.128961914 | 0.003218937 | 0.00659085 | 520 | 520 |
| TCTEX1D4 | 0.12894216  | 0.003223676 | 0.00659988 | 520 | 480 |
| SETD3    | 0.128901189 | 0.003233525 | 0.0066187  | 520 | 520 |
| CDK13    | 0.128873357 | 0.003240231 | 0.00663175 | 520 | 520 |
| XKR5     | 0.12887093  | 0.003240817 | 0.00663228 | 520 | 428 |
| CPA4     | 0.12879121  | 0.003260098 | 0.00666835 | 520 | 520 |

|           |             |             |            |     |     |
|-----------|-------------|-------------|------------|-----|-----|
| BPTF      | 0.128762037 | 0.00326718  | 0.00668216 | 520 | 520 |
| LRTM2     | 0.128748582 | 0.003270452 | 0.00668817 | 520 | 251 |
| SVIL      | 0.12872354  | 0.003276548 | 0.00669996 | 520 | 520 |
| B4GALT3   | 0.128702381 | 0.003281706 | 0.00670983 | 520 | 520 |
| CHD1L     | 0.128694817 | 0.003283552 | 0.00671292 | 520 | 520 |
| ANKRD58   | 0.128673016 | 0.003288878 | 0.00672313 | 520 | 519 |
| ZBTB26    | 0.128661314 | 0.00329174  | 0.00672693 | 520 | 520 |
| RUNX3     | 0.128630882 | 0.003299193 | 0.00674148 | 520 | 520 |
| EP400     | 0.128552662 | 0.00331842  | 0.00677733 | 520 | 520 |
| PAQR3     | 0.128543112 | 0.003320774 | 0.00678146 | 520 | 520 |
| VPRBP     | 0.128521714 | 0.003326055 | 0.00679031 | 520 | 520 |
| SAMD8     | 0.128521446 | 0.003326122 | 0.00679031 | 520 | 520 |
| STAT2     | 0.128469955 | 0.003338861 | 0.00681563 | 520 | 520 |
| SP2       | 0.128377328 | 0.003361889 | 0.00685916 | 520 | 520 |
| CCR5      | 0.12831243  | 0.003378109 | 0.00689017 | 520 | 520 |
| SPRY3     | 0.128288104 | 0.003384207 | 0.00690191 | 520 | 520 |
| UNC13A    | 0.128259624 | 0.003391359 | 0.00691579 | 520 | 512 |
| FAM69C    | 0.128224208 | 0.003400273 | 0.00693257 | 520 | 397 |
| SLC4A4    | 0.128196219 | 0.003407332 | 0.00694556 | 520 | 505 |
| LLGL1     | 0.128162163 | 0.003415939 | 0.00696169 | 520 | 520 |
| B3GNT2    | 0.128084464 | 0.00343565  | 0.00699904 | 520 | 520 |
| SAP130    | 0.128068373 | 0.003439745 | 0.00700667 | 520 | 520 |
| SLC35A2   | 0.128000365 | 0.003457101 | 0.00703847 | 520 | 520 |
| C1orf129  | 0.127995593 | 0.003458322 | 0.00704024 | 520 | 220 |
| EMID1     | 0.127949238 | 0.003470202 | 0.007063   | 520 | 520 |
| CRLS1     | 0.127923348 | 0.003476853 | 0.00707441 | 520 | 520 |
| TNFRSF8   | 0.1278816   | 0.003487602 | 0.00709484 | 520 | 520 |
| C16orf52  | 0.127760136 | 0.003519048 | 0.00715375 | 520 | 520 |
| ANKRD28   | 0.127741326 | 0.00352394  | 0.00716298 | 520 | 520 |
| TMEM86A   | 0.12773888  | 0.003524577 | 0.00716355 | 520 | 520 |
| ZBED4     | 0.127724606 | 0.003528295 | 0.00717038 | 520 | 520 |
| PPP2R5E   | 0.127582581 | 0.003565478 | 0.00724376 | 520 | 520 |
| C5orf49   | 0.12755004  | 0.003574048 | 0.00726044 | 520 | 405 |
| ACCN2     | 0.127496343 | 0.003588229 | 0.00728631 | 520 | 520 |
| ZC3H18    | 0.127385466 | 0.003617674 | 0.00734093 | 520 | 520 |
| LOC441177 | 0.127370904 | 0.003621557 | 0.00734807 | 520 | 125 |
| RHOH      | 0.127328152 | 0.00363298  | 0.00736902 | 520 | 520 |
| KIAA0430  | 0.127319473 | 0.003635303 | 0.00737299 | 520 | 520 |
| SMARCAD1  | 0.127298397 | 0.003640949 | 0.0073837  | 520 | 520 |
| UNC80     | 0.12726099  | 0.003650991 | 0.00740183 | 520 | 434 |
| PKD1L3    | 0.12711941  | 0.003689224 | 0.00747608 | 520 | 306 |
| LOC121952 | 0.127107025 | 0.003692585 | 0.00748164 | 520 | 361 |
| SNCAIP    | 0.127100911 | 0.003694246 | 0.00748425 | 520 | 519 |
| GBX2      | 0.12709544  | 0.003695732 | 0.00748651 | 520 | 488 |
| ZNF560    | 0.126982387 | 0.003726571 | 0.00754595 | 520 | 231 |
| NCK2      | 0.126894984 | 0.003750573 | 0.00759074 | 520 | 520 |



|          |             |             |            |     |     |
|----------|-------------|-------------|------------|-----|-----|
| KIF2A    | 0.126882434 | 0.003754031 | 0.00759621 | 520 | 520 |
| C7orf69  | 0.126663873 | 0.003814714 | 0.00771204 | 520 | 201 |
| FAM180B  | 0.126660653 | 0.003815615 | 0.00771309 | 520 | 298 |
| RAB40A   | 0.126646212 | 0.003819657 | 0.00771978 | 520 | 491 |
| MAML1    | 0.12664609  | 0.003819691 | 0.00771978 | 520 | 520 |
| FLNB     | 0.126619138 | 0.003827244 | 0.00773272 | 520 | 520 |
| HLA-DQA2 | 0.12661502  | 0.003828399 | 0.00773351 | 520 | 520 |
| RSC1A1   | 0.126543114 | 0.003848623 | 0.00777358 | 520 | 520 |
| FAIM2    | 0.126494886 | 0.003862242 | 0.00779952 | 520 | 513 |
| RNLS     | 0.126425934 | 0.003881788 | 0.00783664 | 520 | 520 |
| MARK4    | 0.126410496 | 0.003886176 | 0.00784393 | 520 | 520 |
| AGPS     | 0.126394919 | 0.003890609 | 0.00785209 | 520 | 520 |
| VAC14    | 0.126390225 | 0.003891946 | 0.007854   | 520 | 520 |
| TMEM38A  | 0.126316388 | 0.003913026 | 0.00789338 | 520 | 520 |
| ADSL     | 0.126222832 | 0.003939884 | 0.00794518 | 520 | 520 |
| FAM3C    | 0.126184001 | 0.003951081 | 0.00796537 | 520 | 520 |
| SLC26A7  | 0.126134267 | 0.003965463 | 0.00799196 | 520 | 423 |
| CRLF2    | 0.126127591 | 0.003967397 | 0.00799415 | 520 | 384 |
| DDOST    | 0.126118141 | 0.003970137 | 0.00799819 | 520 | 520 |
| INTS2    | 0.126057754 | 0.003987682 | 0.00803193 | 520 | 520 |
| ZNF516   | 0.12603643  | 0.003993895 | 0.00804127 | 520 | 520 |
| DMPK     | 0.126035858 | 0.003994062 | 0.00804127 | 520 | 520 |
| PCDHA12  | 0.126034995 | 0.003994313 | 0.00804127 | 520 | 192 |
| HAR1B    | 0.125981836 | 0.00400984  | 0.0080693  | 520 | 447 |
| CXorf57  | 0.125975701 | 0.004011636 | 0.00807211 | 520 | 518 |
| KIAA0802 | 0.125966133 | 0.004014437 | 0.00807533 | 520 | 520 |
| ITIH5    | 0.125924559 | 0.004026631 | 0.00809824 | 520 | 520 |
| TTC9C    | 0.12589395  | 0.00403563  | 0.00811553 | 520 | 520 |
| PTPN22   | 0.125751776 | 0.004077669 | 0.00819517 | 520 | 520 |
| GCNT4    | 0.125739032 | 0.004081456 | 0.00820196 | 520 | 519 |
| MAGEC3   | 0.125654588 | 0.004106634 | 0.00824845 | 520 | 99  |
| CASP14   | 0.12562252  | 0.004116231 | 0.0082669  | 520 | 465 |
| THOC5    | 0.125584455 | 0.004127651 | 0.00828901 | 520 | 520 |
| DPP6     | 0.125576544 | 0.004130027 | 0.00829296 | 520 | 388 |
| SOCS7    | 0.125538237 | 0.004141554 | 0.00831527 | 520 | 520 |
| FAM35B2  | 0.125530481 | 0.004143892 | 0.00831914 | 520 | 520 |
| POT1     | 0.125510007 | 0.004150067 | 0.00832988 | 520 | 520 |
| NKAIN2   | 0.125474349 | 0.004160843 | 0.00834901 | 520 | 505 |
| MMGT1    | 0.125468618 | 0.004162577 | 0.00835166 | 520 | 520 |
| CEP68    | 0.125429881 | 0.004174317 | 0.00837355 | 520 | 520 |
| DHX37    | 0.125398298 | 0.00418391  | 0.00839034 | 520 | 520 |
| PLEKHM2  | 0.125365267 | 0.004193965 | 0.00840643 | 520 | 520 |
| ESF1     | 0.125254557 | 0.004227824 | 0.00847161 | 520 | 520 |
| CAND2    | 0.125243926 | 0.004231089 | 0.00847731 | 520 | 520 |
| AVL9     | 0.125187072 | 0.004248585 | 0.00850899 | 520 | 520 |
| VSTM2L   | 0.125090583 | 0.004278428 | 0.00856705 | 520 | 517 |

|              |             |             |            |     |     |
|--------------|-------------|-------------|------------|-----|-----|
| CTNS         | 0.125035751 | 0.004295472 | 0.00859947 | 520 | 520 |
| LPHN3        | 0.125012567 | 0.004302697 | 0.00861223 | 520 | 515 |
| SCAMP4       | 0.125004709 | 0.004305148 | 0.00861628 | 520 | 520 |
| MAGEA4       | 0.124936443 | 0.004326496 | 0.00865729 | 520 | 419 |
| MMP23A       | 0.12492786  | 0.004329187 | 0.00866095 | 520 | 69  |
| COL19A1      | 0.124912012 | 0.00433416  | 0.00867004 | 520 | 394 |
| KC6          | 0.124883511 | 0.004343115 | 0.00868623 | 520 | 367 |
| CDC73        | 0.124866207 | 0.004348561 | 0.00869626 | 520 | 520 |
| TNF          | 0.124821128 | 0.004362776 | 0.00872209 | 520 | 520 |
| CXCL2        | 0.124807753 | 0.004367001 | 0.00872967 | 520 | 520 |
| LRRC6        | 0.124751579 | 0.004384789 | 0.00876436 | 520 | 517 |
| NCRNA00085   | 0.12470539  | 0.004399464 | 0.00879282 | 520 | 520 |
| GORASP1      | 0.124700931 | 0.004400883 | 0.00879479 | 520 | 520 |
| IFIT5        | 0.12466246  | 0.004413144 | 0.00881842 | 520 | 520 |
| SERPINA9     | 0.124656081 | 0.004415179 | 0.00882161 | 520 | 436 |
| GNA14        | 0.124575122 | 0.004441092 | 0.0088725  | 520 | 517 |
| FBXL13       | 0.124556162 | 0.00444718  | 0.00888379 | 520 | 515 |
| NCRNA00119   | 0.124544152 | 0.004451041 | 0.00889062 | 520 | 399 |
| IGF2BP3      | 0.124432305 | 0.004487139 | 0.00895828 | 520 | 520 |
| GPR146       | 0.124341666 | 0.004516586 | 0.0090144  | 520 | 520 |
| CSMD3        | 0.124311817 | 0.004526321 | 0.00903188 | 520 | 363 |
| TMEM45A      | 0.124310693 | 0.004526688 | 0.00903188 | 520 | 520 |
| NSMAF        | 0.124254154 | 0.004545182 | 0.00906609 | 520 | 520 |
| NPFFR2       | 0.124244817 | 0.004548243 | 0.00907129 | 520 | 229 |
| DCP1B        | 0.124229996 | 0.004553105 | 0.00908009 | 520 | 520 |
| CDC42EP2     | 0.124176348 | 0.004570744 | 0.00911347 | 520 | 520 |
| ZNF441       | 0.124153813 | 0.004578172 | 0.00912647 | 520 | 519 |
| MPPED2       | 0.124134087 | 0.004584683 | 0.00913855 | 520 | 498 |
| FAM89B       | 0.124078426 | 0.0046031   | 0.00917344 | 520 | 520 |
| ZNF28        | 0.123968943 | 0.00463952  | 0.00924237 | 520 | 520 |
| LDB1         | 0.123964959 | 0.00464085  | 0.00924411 | 520 | 520 |
| LUZP6        | 0.123933213 | 0.004651462 | 0.0092625  | 520 | 520 |
| IGFN1        | 0.123927209 | 0.004653471 | 0.00926559 | 520 | 489 |
| FBXL12       | 0.123783279 | 0.004701877 | 0.00935458 | 520 | 520 |
| LAPTM4B      | 0.123749491 | 0.004713306 | 0.00937547 | 520 | 520 |
| ITPR3        | 0.123676134 | 0.004738206 | 0.00942221 | 520 | 520 |
| PTCH2        | 0.123624347 | 0.004755856 | 0.00945358 | 520 | 515 |
| DKFZP434L187 | 0.123616912 | 0.004758395 | 0.00945769 | 520 | 179 |
| RNF19A       | 0.123576627 | 0.004772172 | 0.00947947 | 520 | 520 |
| RIMBP3C      | 0.123574052 | 0.004773055 | 0.00947948 | 520 | 502 |
| SFRS2IP      | 0.123565769 | 0.004775892 | 0.00948405 | 520 | 520 |
| GABRA5       | 0.123554452 | 0.004779772 | 0.00948896 | 520 | 208 |
| ZNF717       | 0.123547578 | 0.00478213  | 0.0094927  | 520 | 497 |
| KLHL28       | 0.123532514 | 0.0047873   | 0.00950109 | 520 | 520 |
| TSPAN15      | 0.123530608 | 0.004787955 | 0.00950146 | 520 | 520 |
| RAP1B        | 0.123528362 | 0.004788726 | 0.00950205 | 520 | 520 |

|              |             |             |            |     |     |
|--------------|-------------|-------------|------------|-----|-----|
| EAF1         | 0.123512891 | 0.004794043 | 0.00951073 | 520 | 520 |
| GBA          | 0.123478657 | 0.004805828 | 0.00953317 | 520 | 520 |
| SETD2        | 0.123476375 | 0.004806615 | 0.0095338  | 520 | 520 |
| TASP1        | 0.123442429 | 0.004818328 | 0.00955609 | 520 | 520 |
| ZNF709       | 0.123440933 | 0.004818845 | 0.00955617 | 520 | 517 |
| SLC25A20     | 0.123432358 | 0.004821808 | 0.00956111 | 520 | 520 |
| SMCR7L       | 0.123325096 | 0.004859013 | 0.00963299 | 520 | 520 |
| LOC84989     | 0.123317863 | 0.004861531 | 0.00963662 | 520 | 518 |
| YKT6         | 0.123281133 | 0.004874336 | 0.00965862 | 520 | 520 |
| LOC100286844 | 0.123272799 | 0.004877246 | 0.00966344 | 520 | 518 |
| CITED2       | 0.123252553 | 0.004884322 | 0.0096765  | 520 | 520 |
| SMAD6        | 0.123227001 | 0.004893264 | 0.00969041 | 520 | 520 |
| NEK4         | 0.123156897 | 0.004917876 | 0.00973533 | 520 | 520 |
| ATF1         | 0.123138372 | 0.004924398 | 0.00974728 | 520 | 520 |
| TANC1        | 0.123113791 | 0.004933064 | 0.00976348 | 520 | 520 |
| TMED9        | 0.12306241  | 0.004951223 | 0.00979749 | 520 | 520 |
| FAM175A      | 0.122996806 | 0.004974497 | 0.00984258 | 520 | 520 |
| SASH3        | 0.122993277 | 0.004975752 | 0.0098441  | 520 | 520 |
| LOC283922    | 0.122991773 | 0.004976287 | 0.00984419 | 520 | 520 |
| SERPINA11    | 0.122983923 | 0.004979079 | 0.00984875 | 520 | 388 |
| ZNF264       | 0.122977718 | 0.004981288 | 0.00985215 | 520 | 520 |
| C22orf13     | 0.122954669 | 0.004989498 | 0.00986742 | 520 | 520 |
| RABL5        | 0.122937214 | 0.004995724 | 0.00987683 | 520 | 520 |
| RUNDC3B      | 0.122914792 | 0.005003732 | 0.00989072 | 520 | 519 |
| TXNDC3       | 0.122862603 | 0.005022415 | 0.00992668 | 520 | 444 |
| PPFIA4       | 0.122854188 | 0.005025434 | 0.00993167 | 520 | 519 |
| GPR75        | 0.122793956 | 0.005047087 | 0.00997349 | 520 | 513 |
| FLJ34503     | 0.122745127 | 0.005064702 | 0.01000392 | 520 | 176 |
| KITLG        | 0.122738427 | 0.005067123 | 0.0100072  | 520 | 520 |
| MEX3D        | 0.122718091 | 0.005074479 | 0.01001904 | 520 | 520 |
| SUN3         | 0.122717732 | 0.005074609 | 0.01001904 | 520 | 421 |
| GPR172A      | 0.122708043 | 0.005078117 | 0.01002498 | 520 | 520 |
| SLC2A7       | 0.122614325 | 0.005112163 | 0.01008725 | 520 | 206 |
| SNX6         | 0.122588852 | 0.005121452 | 0.01010459 | 520 | 520 |
| FAM22D       | 0.122587231 | 0.005122044 | 0.01010477 | 520 | 520 |
| LOC728855    | 0.122550356 | 0.005135519 | 0.01012938 | 520 | 520 |
| C1orf55      | 0.122443619 | 0.005174705 | 0.01020467 | 520 | 520 |
| PRRT2        | 0.122417434 | 0.005184359 | 0.01022271 | 520 | 518 |
| FITM1        | 0.122367175 | 0.005202935 | 0.01025733 | 520 | 519 |
| SLC6A2       | 0.122343783 | 0.005211601 | 0.0102714  | 520 | 509 |
| ERVFRDE1     | 0.122334661 | 0.005214984 | 0.01027707 | 520 | 354 |
| MLL3         | 0.122319762 | 0.005220514 | 0.01028595 | 520 | 520 |
| HPS4         | 0.122314836 | 0.005222343 | 0.01028855 | 520 | 520 |
| MORF4L1      | 0.122288637 | 0.005232083 | 0.01030673 | 520 | 520 |
| CTDSPL2      | 0.122267832 | 0.005239829 | 0.01031796 | 520 | 520 |
| NETO2        | 0.122246798 | 0.005247671 | 0.01033138 | 520 | 520 |

|           |             |             |            |     |     |
|-----------|-------------|-------------|------------|-----|-----|
| ITFG3     | 0.122241931 | 0.005249486 | 0.01033395 | 520 | 520 |
| PPP1R2P3  | 0.122231081 | 0.005253537 | 0.01034091 | 520 | 520 |
| GALNTL4   | 0.122181735 | 0.005271994 | 0.01037623 | 520 | 520 |
| MATN1     | 0.122098267 | 0.005303346 | 0.01043285 | 520 | 462 |
| IRX1      | 0.12209826  | 0.005303349 | 0.01043285 | 520 | 462 |
| PTPDC1    | 0.122085308 | 0.005308229 | 0.01044041 | 520 | 520 |
| GNG12     | 0.122042534 | 0.005324374 | 0.01047013 | 520 | 520 |
| CCL4L2    | 0.122027961 | 0.005329885 | 0.01047994 | 520 | 520 |
| CNST      | 0.121995296 | 0.005342255 | 0.01049915 | 520 | 520 |
| ARAP1     | 0.121964213 | 0.005354051 | 0.01051823 | 520 | 520 |
| ZNF286B   | 0.12194259  | 0.005362271 | 0.01053307 | 520 | 520 |
| LGR6      | 0.121941591 | 0.005362651 | 0.01053307 | 520 | 519 |
| KLRG1     | 0.121937407 | 0.005364243 | 0.01053517 | 520 | 517 |
| FAM113B   | 0.121922878 | 0.005369773 | 0.01054501 | 520 | 520 |
| FAM57B    | 0.121869412 | 0.005390172 | 0.01058197 | 520 | 467 |
| C11orf75  | 0.121794603 | 0.00541883  | 0.01063409 | 520 | 520 |
| NYNRIN    | 0.121759519 | 0.005432318 | 0.01065929 | 520 | 520 |
| ZP4       | 0.12173897  | 0.005440231 | 0.01067194 | 520 | 276 |
| SPESP1    | 0.121664162 | 0.005469129 | 0.01072445 | 520 | 511 |
| RNF168    | 0.12164533  | 0.005476425 | 0.01073771 | 520 | 520 |
| MAP2      | 0.121641508 | 0.005477907 | 0.01073853 | 520 | 520 |
| KY        | 0.121630737 | 0.005482085 | 0.01074463 | 520 | 496 |
| KCNA4     | 0.121627604 | 0.005483301 | 0.01074597 | 520 | 174 |
| C14orf174 | 0.121620206 | 0.005486173 | 0.01075055 | 520 | 518 |
| BTN3A3    | 0.121609221 | 0.00549044  | 0.01075787 | 520 | 520 |
| FBXO7     | 0.12160608  | 0.00549166  | 0.01075921 | 520 | 520 |
| PHC3      | 0.121573826 | 0.005504209 | 0.01078275 | 520 | 520 |
| USP32     | 0.121570306 | 0.005505579 | 0.01078439 | 520 | 520 |
| MYO16     | 0.121519411 | 0.005525437 | 0.01082118 | 520 | 495 |
| CPNE4     | 0.121506825 | 0.005530357 | 0.01082872 | 520 | 344 |
| DEPDC7    | 0.121477866 | 0.005541694 | 0.0108467  | 520 | 520 |
| LMTK2     | 0.121447487 | 0.005553609 | 0.01086791 | 520 | 520 |
| ATP2B4    | 0.121406611 | 0.005569677 | 0.0108983  | 520 | 520 |
| GIGYF2    | 0.121371923 | 0.005583346 | 0.01091975 | 520 | 520 |
| GNGT2     | 0.121350483 | 0.005591809 | 0.01093524 | 520 | 520 |
| UBL4B     | 0.121339771 | 0.005596042 | 0.01094245 | 520 | 432 |
| GMCL1     | 0.121281017 | 0.00561931  | 0.01098317 | 520 | 520 |
| FAM5C     | 0.121280314 | 0.005619589 | 0.01098317 | 520 | 224 |
| UCHL1     | 0.121264189 | 0.00562599  | 0.01099462 | 520 | 520 |
| CCL14     | 0.121245352 | 0.005633476 | 0.01100818 | 520 | 516 |
| NPY1R     | 0.121186983 | 0.00565673  | 0.01105255 | 520 | 440 |
| STS       | 0.121173212 | 0.005662229 | 0.01106222 | 520 | 520 |
| CCDC74B   | 0.121171668 | 0.005662846 | 0.01106236 | 520 | 519 |
| TSC22D2   | 0.121166095 | 0.005665073 | 0.01106563 | 520 | 520 |
| MGLL      | 0.121161993 | 0.005666713 | 0.01106669 | 520 | 520 |
| NPHP3     | 0.121156751 | 0.005668809 | 0.01106971 | 520 | 520 |

|               |             |             |            |     |     |
|---------------|-------------|-------------|------------|-----|-----|
| C15orf32      | 0.121097707 | 0.005692465 | 0.01111483 | 520 | 110 |
| ABCB5         | 0.121093166 | 0.005694288 | 0.01111731 | 520 | 361 |
| LOC283392     | 0.121077168 | 0.005700715 | 0.01112771 | 520 | 293 |
| GPAM          | 0.12107431  | 0.005701864 | 0.01112887 | 520 | 520 |
| FLJ45983      | 0.121071308 | 0.005703071 | 0.01113015 | 520 | 388 |
| KHDRBS3       | 0.12099003  | 0.005735835 | 0.01119193 | 520 | 520 |
| NEK10         | 0.120930824 | 0.005759808 | 0.01123762 | 520 | 488 |
| POLR2C        | 0.12091339  | 0.005766885 | 0.01125033 | 520 | 520 |
| GMFB          | 0.120889572 | 0.005776565 | 0.01126813 | 520 | 520 |
| POLG          | 0.120843417 | 0.005795365 | 0.01130262 | 520 | 520 |
| FCF1          | 0.120709537 | 0.00585021  | 0.01140627 | 520 | 520 |
| LRP5          | 0.120708148 | 0.005850781 | 0.01140628 | 520 | 520 |
| FAM193A       | 0.120701218 | 0.005853633 | 0.01141074 | 520 | 520 |
| DIO3OS        | 0.120667437 | 0.005867553 | 0.01143345 | 520 | 349 |
| KIAA0317      | 0.120602565 | 0.005894366 | 0.01148237 | 520 | 520 |
| LOC402377     | 0.120578884 | 0.005904182 | 0.01149927 | 520 | 505 |
| C2orf58       | 0.120545292 | 0.005918131 | 0.01152198 | 520 | 383 |
| BTN3A2        | 0.120538992 | 0.00592075  | 0.01152486 | 520 | 520 |
| PLK3          | 0.120501549 | 0.005936339 | 0.01155297 | 520 | 520 |
| DPH1          | 0.120494957 | 0.005939088 | 0.01155721 | 520 | 520 |
| RAD51L3       | 0.120405399 | 0.005976539 | 0.01162448 | 520 | 520 |
| FADS2         | 0.120369574 | 0.00599158  | 0.01165148 | 520 | 520 |
| ZNF510        | 0.120340049 | 0.006004002 | 0.01167001 | 520 | 520 |
| MIMT1         | 0.120321765 | 0.006011706 | 0.01168273 | 520 | 80  |
| CCDC123       | 0.120308644 | 0.006017239 | 0.01169123 | 520 | 520 |
| CCDC122       | 0.120277384 | 0.006030442 | 0.01171463 | 520 | 520 |
| C3orf63       | 0.120275829 | 0.006031099 | 0.01171478 | 520 | 520 |
| MT1E          | 0.120265629 | 0.006035413 | 0.01172028 | 520 | 520 |
| SH3TC2        | 0.120265008 | 0.006035676 | 0.01172028 | 520 | 520 |
| FBXL14        | 0.12024233  | 0.006045278 | 0.01173681 | 520 | 520 |
| C1orf180      | 0.120139705 | 0.0060889   | 0.01181339 | 520 | 233 |
| CSNK1A1P      | 0.120069178 | 0.006119043 | 0.01186617 | 520 | 447 |
| TAF1          | 0.12005284  | 0.006126045 | 0.0118786  | 520 | 520 |
| DKFZp434J0226 | 0.120043792 | 0.006129925 | 0.01188498 | 520 | 502 |
| ECEL1         | 0.120035174 | 0.006133624 | 0.01189101 | 520 | 507 |
| EFCAB1        | 0.120033062 | 0.00613453  | 0.01189162 | 520 | 514 |
| MMP20         | 0.119899964 | 0.006191911 | 0.01199434 | 520 | 261 |
| ASGR2         | 0.119845848 | 0.006215378 | 0.01203446 | 520 | 516 |
| MYO1E         | 0.119837441 | 0.006219031 | 0.01204038 | 520 | 520 |
| NRG2          | 0.119784226 | 0.006242198 | 0.01208175 | 520 | 480 |
| MCM9          | 0.119772002 | 0.00624753  | 0.01209091 | 520 | 520 |
| NXNL2         | 0.119753315 | 0.00625569  | 0.01210554 | 520 | 350 |
| CDC42BPB      | 0.119676081 | 0.006289517 | 0.01216633 | 520 | 520 |
| NFIB          | 0.119659828 | 0.006296656 | 0.0121778  | 520 | 520 |
| TMEM115       | 0.119635375 | 0.006307411 | 0.01219626 | 520 | 520 |
| RSBN1         | 0.119633473 | 0.006308248 | 0.01219671 | 520 | 520 |

|          |             |             |            |     |     |
|----------|-------------|-------------|------------|-----|-----|
| LIN52    | 0.119614779 | 0.006316482 | 0.01221103 | 520 | 519 |
| FAM109A  | 0.119613908 | 0.006316866 | 0.01221103 | 520 | 520 |
| NCKAP5   | 0.119593582 | 0.00632583  | 0.01222719 | 520 | 520 |
| ARPP19   | 0.11953192  | 0.006353095 | 0.01227754 | 520 | 520 |
| MAVS     | 0.119519572 | 0.006358568 | 0.01228693 | 520 | 520 |
| KBTBD13  | 0.119508995 | 0.006363258 | 0.01229482 | 520 | 95  |
| LUZP4    | 0.119457979 | 0.006385928 | 0.01233744 | 520 | 132 |
| UBE4A    | 0.119379795 | 0.00642081  | 0.0123977  | 520 | 520 |
| KCNJ2    | 0.119338948 | 0.006439103 | 0.01243064 | 520 | 520 |
| LMBRD1   | 0.119309644 | 0.006452255 | 0.01245484 | 520 | 520 |
| SRFBP1   | 0.11929547  | 0.006458625 | 0.01246594 | 520 | 520 |
| CCL17    | 0.119238628 | 0.006484227 | 0.01251416 | 520 | 515 |
| ZNF92    | 0.119232015 | 0.006487212 | 0.01251872 | 520 | 520 |
| SCAMP5   | 0.119229483 | 0.006488354 | 0.0125197  | 520 | 520 |
| DGKG     | 0.119228141 | 0.006488961 | 0.0125197  | 520 | 519 |
| MPHOSPH8 | 0.119179763 | 0.006510836 | 0.0125595  | 520 | 520 |
| NDFIP1   | 0.119136999 | 0.006530229 | 0.0125933  | 520 | 520 |
| KIAA1797 | 0.119108689 | 0.006543095 | 0.0126157  | 520 | 520 |
| GLRX     | 0.119105074 | 0.00654474  | 0.01261766 | 520 | 520 |
| ARL6IP6  | 0.119099655 | 0.006547206 | 0.01262121 | 520 | 520 |
| ZNF492   | 0.119038418 | 0.006575131 | 0.01267383 | 520 | 387 |
| ANO10    | 0.11899939  | 0.006592984 | 0.01270581 | 520 | 520 |
| SRI      | 0.118984809 | 0.006599664 | 0.01271747 | 520 | 520 |
| CCDC126  | 0.118968782 | 0.006607015 | 0.01272939 | 520 | 520 |
| ZXDB     | 0.118954201 | 0.006613709 | 0.01274088 | 520 | 520 |
| PRB2     | 0.118947966 | 0.006616573 | 0.01274518 | 520 | 288 |
| WNT3     | 0.118902078 | 0.006637687 | 0.01278341 | 520 | 519 |
| ZNF669   | 0.118884363 | 0.006645854 | 0.0127967  | 520 | 520 |
| LZTFL1   | 0.118866394 | 0.006654147 | 0.01281022 | 520 | 520 |
| GNG7     | 0.118850754 | 0.006661374 | 0.01282168 | 520 | 520 |
| AKAP5    | 0.118843314 | 0.006664814 | 0.01282708 | 520 | 519 |
| PCDHGC4  | 0.118818765 | 0.006676175 | 0.01284527 | 520 | 474 |
| PGPEP1   | 0.118794921 | 0.006687227 | 0.01286408 | 520 | 520 |
| LHX6     | 0.118783983 | 0.006692302 | 0.01287261 | 520 | 518 |
| CRHR2    | 0.118777171 | 0.006695465 | 0.01287747 | 520 | 294 |
| NRG1     | 0.118746447 | 0.006709746 | 0.0129037  | 520 | 520 |
| SYT5     | 0.118700481 | 0.006731162 | 0.01294242 | 520 | 494 |
| FCRLB    | 0.118668829 | 0.006745946 | 0.01296961 | 520 | 520 |
| GNB5     | 0.118592899 | 0.006781527 | 0.01303553 | 520 | 520 |
| OR5E1P   | 0.1185743   | 0.006790269 | 0.01305109 | 520 | 61  |
| SNX8     | 0.118552306 | 0.006800619 | 0.01306974 | 520 | 520 |
| JSRP1    | 0.118541649 | 0.006805639 | 0.01307814 | 520 | 512 |
| DGCR5    | 0.118397717 | 0.006873765 | 0.01319899 | 520 | 516 |
| C7orf65  | 0.118371797 | 0.006886098 | 0.01322141 | 520 | 228 |
| OR56B4   | 0.118363979 | 0.006889822 | 0.0132273  | 520 | 257 |
| RPE      | 0.118324079 | 0.006908855 | 0.01326006 | 520 | 520 |

|              |             |             |            |     |     |
|--------------|-------------|-------------|------------|-----|-----|
| LOC100128076 | 0.118317709 | 0.006911898 | 0.01326463 | 520 | 154 |
| ATAD1        | 0.11831231  | 0.006914478 | 0.01326832 | 520 | 520 |
| FAM9C        | 0.11829148  | 0.00692444  | 0.01328617 | 520 | 122 |
| WHAMML2      | 0.11823819  | 0.006949985 | 0.0133285  | 520 | 514 |
| FLJ30679     | 0.118230454 | 0.006953701 | 0.01333217 | 520 | 455 |
| ZNF575       | 0.1181949   | 0.006970799 | 0.01336241 | 520 | 520 |
| RAD21        | 0.118181174 | 0.00697741  | 0.01337381 | 520 | 520 |
| GPR63        | 0.118164203 | 0.006985592 | 0.01338822 | 520 | 487 |
| FGL1         | 0.118138362 | 0.006998066 | 0.01341085 | 520 | 349 |
| RLIM         | 0.118104098 | 0.007014638 | 0.01344133 | 520 | 520 |
| OTOS         | 0.118073617 | 0.007029409 | 0.01346836 | 520 | 118 |
| SMG1         | 0.11798972  | 0.00707021  | 0.01354267 | 520 | 520 |
| ATXN7L3B     | 0.117850107 | 0.007138578 | 0.01366525 | 520 | 520 |
| EPHB4        | 0.117848914 | 0.007139165 | 0.01366525 | 520 | 520 |
| PPIP5K2      | 0.117847982 | 0.007139623 | 0.01366525 | 520 | 520 |
| CCDC140      | 0.117846135 | 0.007140531 | 0.01366569 | 520 | 246 |
| C2orf67      | 0.117840941 | 0.007143087 | 0.01366928 | 520 | 520 |
| CD1C         | 0.117835701 | 0.007145666 | 0.01367032 | 520 | 518 |
| SYT12        | 0.117804264 | 0.007161156 | 0.01369736 | 520 | 520 |
| ZNF597       | 0.117786638 | 0.007169854 | 0.01371269 | 520 | 517 |
| CD101        | 0.117782454 | 0.007171919 | 0.01371534 | 520 | 520 |
| CETN4P       | 0.117754579 | 0.007185698 | 0.01374025 | 520 | 408 |
| ST13         | 0.11775335  | 0.007186306 | 0.01374025 | 520 | 520 |
| TMEM192      | 0.117713196 | 0.007206196 | 0.01377436 | 520 | 520 |
| TJAP1        | 0.117701024 | 0.007212236 | 0.01378199 | 520 | 520 |
| C12orf39     | 0.117647629 | 0.007238781 | 0.01383009 | 520 | 187 |
| WDR91        | 0.117631053 | 0.00724704  | 0.01384435 | 520 | 520 |
| LIG3         | 0.117629893 | 0.007247619 | 0.01384435 | 520 | 520 |
| SYNM         | 0.117509392 | 0.007307914 | 0.01395424 | 520 | 520 |
| CUL4B        | 0.117462607 | 0.007331445 | 0.01399255 | 520 | 520 |
| RNF4         | 0.117375617 | 0.007375377 | 0.01407506 | 520 | 520 |
| MPP4         | 0.117358473 | 0.007384063 | 0.0140903  | 520 | 492 |
| TNRC6C       | 0.117352815 | 0.007386931 | 0.01409444 | 520 | 520 |
| IL12RB1      | 0.117299916 | 0.0074138   | 0.01414303 | 520 | 520 |
| CPNE9        | 0.11728761  | 0.007420062 | 0.01415364 | 520 | 400 |
| MICA         | 0.117249185 | 0.007439648 | 0.01418832 | 520 | 520 |
| SMAD5        | 0.117199988 | 0.007464793 | 0.01423089 | 520 | 520 |
| THSD7B       | 0.117150097 | 0.007490369 | 0.01427425 | 520 | 467 |
| RWDD2A       | 0.117075296 | 0.007528863 | 0.01434489 | 520 | 520 |
| CAMK1D       | 0.117029699 | 0.007552414 | 0.0143884  | 520 | 520 |
| C1orf192     | 0.117001523 | 0.007567    | 0.01441347 | 520 | 508 |
| TFAMP1       | 0.116951489 | 0.007592964 | 0.01446019 | 520 | 235 |
| CCRL1        | 0.116927869 | 0.007605248 | 0.01448222 | 520 | 519 |
| ANKRD30B     | 0.116839245 | 0.007651499 | 0.01456342 | 520 | 142 |
| GSN          | 0.116789219 | 0.007677718 | 0.0146078  | 520 | 520 |
| TOR1B        | 0.116785377 | 0.007679735 | 0.01460925 | 520 | 520 |

|           |             |             |            |     |     |
|-----------|-------------|-------------|------------|-----|-----|
| GMCL1L    | 0.116785014 | 0.007679925 | 0.01460925 | 520 | 514 |
| NEDD1     | 0.11677168  | 0.007686929 | 0.01462119 | 520 | 520 |
| ADCY8     | 0.11676976  | 0.007687938 | 0.01462173 | 520 | 161 |
| ACR       | 0.116760599 | 0.007692753 | 0.01462951 | 520 | 470 |
| ZNF749    | 0.116751428 | 0.007697577 | 0.0146373  | 520 | 520 |
| TBC1D9B   | 0.116664543 | 0.00774341  | 0.0147189  | 520 | 520 |
| ATP2A2    | 0.116584728 | 0.007785727 | 0.01479516 | 520 | 520 |
| CDK12     | 0.11654566  | 0.007806516 | 0.01483047 | 520 | 520 |
| ASTN1     | 0.116540785 | 0.007809114 | 0.01483401 | 520 | 392 |
| ZP2       | 0.116518214 | 0.00782115  | 0.01485407 | 520 | 177 |
| BCAS3     | 0.116481256 | 0.007840895 | 0.01488736 | 520 | 520 |
| LGALS14   | 0.116464697 | 0.007849756 | 0.01490279 | 520 | 53  |
| CLN5      | 0.116452941 | 0.007856053 | 0.01491193 | 520 | 520 |
| CLRN3     | 0.116430762 | 0.007867944 | 0.01493232 | 520 | 228 |
| PAPD5     | 0.116430148 | 0.007868273 | 0.01493232 | 520 | 520 |
| DSCR3     | 0.116412257 | 0.007877877 | 0.01494914 | 520 | 520 |
| UBE2Q2P1  | 0.116367808 | 0.007901783 | 0.01499027 | 520 | 517 |
| NOTCH3    | 0.116358098 | 0.007907014 | 0.01499878 | 520 | 520 |
| C6orf59   | 0.116304436 | 0.007935979 | 0.01505231 | 520 | 506 |
| CD40      | 0.116271659 | 0.007953717 | 0.0150817  | 520 | 520 |
| SEC13     | 0.116246618 | 0.007967293 | 0.01510318 | 520 | 520 |
| OR7A5     | 0.116209149 | 0.007987644 | 0.01513891 | 520 | 329 |
| WBP5      | 0.116200248 | 0.007992486 | 0.01514666 | 520 | 520 |
| RNMT      | 0.116097172 | 0.008048743 | 0.01524182 | 520 | 520 |
| C19orf28  | 0.116092374 | 0.008051371 | 0.01524536 | 520 | 520 |
| MS4A15    | 0.116080057 | 0.008058118 | 0.0152567  | 520 | 362 |
| C20orf96  | 0.11602384  | 0.008088982 | 0.01531226 | 520 | 520 |
| TFF2      | 0.115972444 | 0.008117291 | 0.01536441 | 520 | 151 |
| RBL1      | 0.115950402 | 0.008129458 | 0.01538552 | 520 | 520 |
| LOC401431 | 0.115949472 | 0.008129972 | 0.01538552 | 520 | 517 |
| MCART1    | 0.11593233  | 0.008139447 | 0.01540201 | 520 | 519 |
| MCOLN3    | 0.115890732 | 0.008162479 | 0.01544414 | 520 | 516 |
| TLK1      | 0.115873979 | 0.008171772 | 0.01546027 | 520 | 520 |
| LOC728819 | 0.115842601 | 0.008189202 | 0.01549034 | 520 | 483 |
| IL1RAPL2  | 0.11581203  | 0.008206216 | 0.01551816 | 520 | 250 |
| CALM3     | 0.115685953 | 0.008276715 | 0.01564707 | 520 | 520 |
| NCOA6     | 0.115636595 | 0.008304462 | 0.01569658 | 520 | 520 |
| ZNF429    | 0.115628331 | 0.008309115 | 0.01570391 | 520 | 519 |
| C7orf31   | 0.115625748 | 0.00831057  | 0.01570519 | 520 | 520 |
| SNX21     | 0.115571906 | 0.008340952 | 0.01576113 | 520 | 520 |
| NFKBIE    | 0.115551584 | 0.008352445 | 0.01578136 | 520 | 520 |
| NLRP10    | 0.11552922  | 0.008365109 | 0.01580233 | 520 | 435 |
| FSCN3     | 0.115480488 | 0.008392764 | 0.01585271 | 520 | 478 |
| TPSG1     | 0.115444818 | 0.008413058 | 0.01588696 | 520 | 357 |
| AUTS2     | 0.115441648 | 0.008414865 | 0.01588888 | 520 | 520 |
| PLCXD2    | 0.115418563 | 0.008428024 | 0.01591224 | 520 | 519 |



|           |             |             |            |     |     |
|-----------|-------------|-------------|------------|-----|-----|
| MLLT3     | 0.115397596 | 0.008439993 | 0.01593334 | 520 | 520 |
| ZFP42     | 0.115370423 | 0.008455526 | 0.01595968 | 520 | 374 |
| ATP1A4    | 0.11536451  | 0.00845891  | 0.01596457 | 520 | 334 |
| PFN1      | 0.115287565 | 0.008503049 | 0.01604187 | 520 | 520 |
| DNAH17    | 0.115274946 | 0.008510308 | 0.01605406 | 520 | 520 |
| LOC643763 | 0.115264277 | 0.008516449 | 0.01606414 | 520 | 314 |
| AARS      | 0.115243005 | 0.008528705 | 0.01608575 | 520 | 520 |
| C8orf85   | 0.115239605 | 0.008530665 | 0.01608795 | 520 | 407 |
| APPBP2    | 0.114986148 | 0.008677942 | 0.01635346 | 520 | 520 |
| MAGEB18   | 0.114984661 | 0.008678813 | 0.01635357 | 520 | 48  |
| ULBP1     | 0.114981124 | 0.008680884 | 0.01635595 | 520 | 518 |
| VIT       | 0.114941213 | 0.008704287 | 0.01639698 | 520 | 513 |
| CKAP2L    | 0.114927857 | 0.008712132 | 0.01640869 | 520 | 520 |
| HHAT      | 0.114900857 | 0.008728009 | 0.01643552 | 520 | 520 |
| ARRDC3    | 0.114894867 | 0.008731535 | 0.01644063 | 520 | 520 |
| LRP1B     | 0.114834242 | 0.008767292 | 0.01649871 | 520 | 438 |
| TMEM167A  | 0.11477537  | 0.00880214  | 0.01655965 | 520 | 520 |
| FAM149A   | 0.114694872 | 0.008849989 | 0.01664501 | 520 | 517 |
| ADAM23    | 0.114673849 | 0.008862523 | 0.01666703 | 520 | 517 |
| HCN4      | 0.114658274 | 0.008871819 | 0.0166814  | 520 | 370 |
| IL24      | 0.114623416 | 0.008892656 | 0.01671902 | 520 | 520 |
| ZNF438    | 0.114592418 | 0.008911223 | 0.01674768 | 520 | 520 |
| TTC36     | 0.114580587 | 0.008918318 | 0.01675946 | 520 | 262 |
| LOC375190 | 0.11454172  | 0.008941664 | 0.01679863 | 520 | 520 |
| TMEM38B   | 0.114481324 | 0.008978048 | 0.01686384 | 520 | 520 |
| GPR89B    | 0.114474314 | 0.008982279 | 0.01687022 | 520 | 513 |
| RPH3A     | 0.114429939 | 0.009009107 | 0.01691588 | 520 | 387 |
| KLC1      | 0.114406992 | 0.009023008 | 0.0169341  | 520 | 520 |
| HMGXB4    | 0.114395966 | 0.009029694 | 0.01694507 | 520 | 520 |
| CELF1     | 0.11436954  | 0.009045737 | 0.01697359 | 520 | 520 |
| IGSF22    | 0.114276127 | 0.00910265  | 0.01707403 | 520 | 492 |
| UBE3C     | 0.114226412 | 0.00913307  | 0.0171279  | 520 | 520 |
| COMMDD10  | 0.11422013  | 0.00913692  | 0.01713194 | 520 | 520 |
| ANO4      | 0.114202315 | 0.009147847 | 0.01714924 | 520 | 494 |
| PPRC1     | 0.114196028 | 0.009151706 | 0.01715488 | 520 | 520 |
| CRP       | 0.114188158 | 0.009156539 | 0.01716234 | 520 | 284 |
| DAD1L     | 0.114083259 | 0.009221168 | 0.01728026 | 520 | 92  |
| SIX1      | 0.114077497 | 0.00922473  | 0.01728373 | 520 | 520 |
| RUFY2     | 0.114051917 | 0.009240557 | 0.01731016 | 520 | 520 |
| FAM123B   | 0.113923566 | 0.009320337 | 0.01744827 | 520 | 520 |
| CALCOCO1  | 0.113874391 | 0.009351065 | 0.01750092 | 520 | 520 |
| ATP6V1G3  | 0.113764318 | 0.009420173 | 0.01762371 | 520 | 35  |
| KCNN1     | 0.113717065 | 0.009449979 | 0.01767783 | 520 | 514 |
| C4orf12   | 0.11368612  | 0.009469544 | 0.01771279 | 520 | 519 |
| PRDM2     | 0.113658891 | 0.009486789 | 0.01774176 | 520 | 520 |
| POLN      | 0.113656105 | 0.009488555 | 0.01774341 | 520 | 515 |

|          |             |             |            |     |     |
|----------|-------------|-------------|------------|-----|-----|
| IFITM3   | 0.113566579 | 0.009545462 | 0.01784321 | 520 | 520 |
| HES7     | 0.113518689 | 0.009576028 | 0.01789703 | 520 | 461 |
| WDR78    | 0.113511501 | 0.009580623 | 0.01790396 | 520 | 518 |
| SLC12A2  | 0.11350185  | 0.009586796 | 0.01791383 | 520 | 520 |
| FUBP3    | 0.113494529 | 0.009591481 | 0.01792092 | 520 | 520 |
| PCSK1N   | 0.113488521 | 0.009595327 | 0.01792645 | 520 | 503 |
| HBB      | 0.113478529 | 0.009601727 | 0.01793508 | 520 | 519 |
| C9orf41  | 0.113419625 | 0.009639531 | 0.0180029  | 520 | 520 |
| MKX      | 0.113322451 | 0.009702187 | 0.01811602 | 520 | 508 |
| GSG1L    | 0.113312629 | 0.00970854  | 0.0181262  | 520 | 327 |
| NINJ1    | 0.11328     | 0.009729672 | 0.01816398 | 520 | 520 |
| ZNF23    | 0.113277401 | 0.009731356 | 0.01816544 | 520 | 520 |
| NHLH2    | 0.113273204 | 0.009734078 | 0.01816884 | 520 | 467 |
| DLK1     | 0.113120169 | 0.009833775 | 0.01834134 | 520 | 255 |
| FOXJ3    | 0.11304297  | 0.009884412 | 0.01843238 | 520 | 520 |
| MIAT     | 0.113034054 | 0.009890275 | 0.0184416  | 520 | 520 |
| FBXL3    | 0.113003091 | 0.00991066  | 0.0184762  | 520 | 520 |
| AHNAK2   | 0.112979013 | 0.009926537 | 0.01850409 | 520 | 520 |
| POGZ     | 0.112871726 | 0.009997561 | 0.01862271 | 520 | 520 |
| TMPRSS7  | 0.112833318 | 0.010023097 | 0.01866855 | 520 | 370 |
| KLHL25   | 0.112807371 | 0.01004038  | 0.01869729 | 520 | 520 |
| MTFR1    | 0.112728427 | 0.010093129 | 0.01878858 | 520 | 520 |
| PROS1    | 0.11271823  | 0.01009996  | 0.01879956 | 520 | 520 |
| MYCN     | 0.112702497 | 0.010110508 | 0.01881745 | 520 | 515 |
| NT5DC2   | 0.112675621 | 0.01012855  | 0.01884581 | 520 | 520 |
| ZNF235   | 0.112583558 | 0.010190566 | 0.01895421 | 520 | 520 |
| TMPRSS15 | 0.112537081 | 0.010222003 | 0.01901093 | 520 | 236 |
| ANKS1B   | 0.112510229 | 0.010240205 | 0.01903951 | 520 | 467 |
| PRDM4    | 0.112468521 | 0.010268533 | 0.01908514 | 520 | 520 |
| ABHD13   | 0.112414603 | 0.010305258 | 0.01914987 | 520 | 520 |
| CT45A1   | 0.112307091 | 0.010378837 | 0.01928304 | 520 | 200 |
| IGFL4    | 0.112139003 | 0.010494804 | 0.01948414 | 520 | 305 |
| UBAP2L   | 0.112098291 | 0.010523065 | 0.01953481 | 520 | 520 |
| TPSAB1   | 0.112044905 | 0.010560226 | 0.01960018 | 520 | 520 |
| C5orf51  | 0.112015448 | 0.01058078  | 0.01963472 | 520 | 520 |
| FAM35B   | 0.111978371 | 0.010606702 | 0.0196792  | 520 | 520 |
| KLHL22   | 0.111892417 | 0.010667011 | 0.01978017 | 520 | 520 |
| ZNF211   | 0.111846047 | 0.010699672 | 0.01983709 | 520 | 520 |
| TRIM58   | 0.111835382 | 0.010707197 | 0.01984922 | 520 | 497 |
| CUX2     | 0.111765772 | 0.010756424 | 0.01993314 | 520 | 442 |
| ZFP41    | 0.111745729 | 0.010770636 | 0.01995765 | 520 | 520 |
| CCDC75   | 0.111684286 | 0.010814305 | 0.02003165 | 520 | 520 |
| ARHGAP10 | 0.111652362 | 0.010837057 | 0.02006966 | 520 | 520 |
| CLIC6    | 0.111493423 | 0.010950962 | 0.02027315 | 520 | 520 |
| HFM1     | 0.111465223 | 0.010971283 | 0.02030704 | 520 | 306 |
| DPY19L2  | 0.111402674 | 0.011016473 | 0.02038133 | 520 | 517 |

|           |             |             |            |     |     |
|-----------|-------------|-------------|------------|-----|-----|
| ZNF224    | 0.11139782  | 0.011019986 | 0.02038596 | 520 | 520 |
| IDE       | 0.111351695 | 0.011053426 | 0.02044407 | 520 | 520 |
| HOXC8     | 0.111196242 | 0.011166788 | 0.02064049 | 520 | 517 |
| CHPT1     | 0.111186763 | 0.011173734 | 0.02065144 | 520 | 520 |
| IMPA1     | 0.111142689 | 0.011206079 | 0.02070932 | 520 | 520 |
| EDDM3A    | 0.111117111 | 0.011224889 | 0.02074028 | 520 | 108 |
| ROBO2     | 0.111035053 | 0.01128542  | 0.02083875 | 520 | 491 |
| USP36     | 0.111027308 | 0.011291148 | 0.02084742 | 520 | 520 |
| C1orf107  | 0.110987664 | 0.011320508 | 0.02089473 | 520 | 520 |
| LOC148189 | 0.110979753 | 0.011326375 | 0.0209024  | 520 | 519 |
| KRTAP2-2  | 0.11092297  | 0.011368566 | 0.020975   | 520 | 44  |
| CDC14C    | 0.1109055   | 0.011381575 | 0.02099708 | 520 | 511 |
| WDR19     | 0.110835961 | 0.011433486 | 0.02108765 | 520 | 520 |
| TRIM5     | 0.110835534 | 0.011433805 | 0.02108765 | 520 | 520 |
| TDRKH     | 0.110807531 | 0.01145477  | 0.02112438 | 520 | 520 |
| STK32A    | 0.110725862 | 0.011516103 | 0.02123361 | 520 | 332 |
| KIAA0232  | 0.110658359 | 0.011567018 | 0.02132163 | 520 | 520 |
| SEPP1     | 0.110645188 | 0.011576976 | 0.02133804 | 520 | 520 |
| SNX32     | 0.11064068  | 0.011580386 | 0.02134237 | 520 | 445 |
| ZSCAN1    | 0.11058113  | 0.011625513 | 0.02141771 | 520 | 239 |
| LPAR3     | 0.110574966 | 0.011630193 | 0.02142438 | 520 | 520 |
| PSG9      | 0.110553365 | 0.011646607 | 0.02145265 | 520 | 330 |
| LPHN2     | 0.110541186 | 0.01165587  | 0.02146383 | 520 | 520 |
| PHLDA1    | 0.110525334 | 0.011667937 | 0.02147913 | 520 | 520 |
| PANK3     | 0.110510224 | 0.011679449 | 0.02149744 | 520 | 520 |
| SPTLC3    | 0.110433888 | 0.011737763 | 0.02159602 | 520 | 519 |
| PPP2R3A   | 0.110413454 | 0.011753416 | 0.02161779 | 520 | 520 |
| SLC19A3   | 0.110373743 | 0.01178389  | 0.02166989 | 520 | 517 |
| KANK3     | 0.110358825 | 0.011795355 | 0.02168702 | 520 | 520 |
| TGIF2LX   | 0.110347375 | 0.011804162 | 0.02170123 | 520 | 58  |
| C1orf96   | 0.110332594 | 0.01181554  | 0.02172017 | 520 | 520 |
| USP24     | 0.110308444 | 0.01183415  | 0.02174843 | 520 | 520 |
| RNF166    | 0.11029309  | 0.011845996 | 0.02176393 | 520 | 520 |
| FAM114A2  | 0.110265865 | 0.011867025 | 0.02179892 | 520 | 520 |
| ING1      | 0.110263662 | 0.011868728 | 0.02180006 | 520 | 520 |
| CCR6      | 0.110199067 | 0.011918762 | 0.02187602 | 520 | 520 |
| CBFB      | 0.110056352 | 0.012029968 | 0.0220741  | 520 | 520 |
| ABCB1     | 0.110039332 | 0.012043291 | 0.02209654 | 520 | 520 |
| MAGEA10   | 0.110026413 | 0.012053413 | 0.02211309 | 520 | 212 |
| PPIB      | 0.109948674 | 0.012114479 | 0.02221098 | 520 | 520 |
| TCP11L2   | 0.10990691  | 0.012147398 | 0.02226324 | 520 | 520 |
| ZNF493    | 0.109868944 | 0.012177392 | 0.02231415 | 520 | 520 |
| RNF38     | 0.109840653 | 0.012199785 | 0.02235112 | 520 | 520 |
| DHRS12    | 0.109808909 | 0.012224954 | 0.02239317 | 520 | 520 |
| NUMA1     | 0.109787166 | 0.012242221 | 0.02242072 | 520 | 520 |
| BEGAIN    | 0.109772733 | 0.012253694 | 0.02243766 | 520 | 519 |

|              |             |             |            |     |     |
|--------------|-------------|-------------|------------|-----|-----|
| GPR179       | 0.109731376 | 0.012286623 | 0.02248978 | 520 | 428 |
| TRIM34       | 0.109701052 | 0.012310817 | 0.02252793 | 520 | 520 |
| CXCR1        | 0.109685553 | 0.012323199 | 0.02254855 | 520 | 517 |
| ANO3         | 0.109662578 | 0.012341573 | 0.02258012 | 520 | 409 |
| RASGEF1B     | 0.109656745 | 0.012346242 | 0.02258661 | 520 | 520 |
| KRT83        | 0.109637407 | 0.012361732 | 0.0226129  | 520 | 324 |
| MMP28        | 0.109509143 | 0.012464908 | 0.02279164 | 520 | 520 |
| CTSC         | 0.109508907 | 0.012465098 | 0.02279164 | 520 | 520 |
| LOC100133893 | 0.109478953 | 0.012489303 | 0.02283383 | 520 | 230 |
| DSCR8        | 0.109475145 | 0.012492383 | 0.02283739 | 520 | 136 |
| FAIM3        | 0.109472976 | 0.012494138 | 0.02283853 | 520 | 520 |
| ASAH2B       | 0.109450534 | 0.012512306 | 0.02286759 | 520 | 509 |
| SPOP         | 0.109442756 | 0.012518608 | 0.02287704 | 520 | 520 |
| HCG4         | 0.109434404 | 0.012525378 | 0.02288733 | 520 | 519 |
| FAM138E      | 0.109425755 | 0.012532393 | 0.02289808 | 520 | 31  |
| STX1B        | 0.109396818 | 0.012555886 | 0.02293269 | 520 | 520 |
| INTS4        | 0.109342248 | 0.012600296 | 0.02301172 | 520 | 520 |
| SLC1A4       | 0.109331596 | 0.012608981 | 0.02302341 | 520 | 520 |
| ZNF630       | 0.109259576 | 0.012667841 | 0.02312665 | 520 | 516 |
| IPO8         | 0.109259139 | 0.012668199 | 0.02312665 | 520 | 520 |
| GTF2H3       | 0.109256438 | 0.012670411 | 0.0231272  | 520 | 520 |
| CNNM4        | 0.109234066 | 0.012688748 | 0.02315857 | 520 | 520 |
| ZNF343       | 0.109232571 | 0.012689974 | 0.02315872 | 520 | 520 |
| RAPGEF5      | 0.109220341 | 0.012700009 | 0.02317493 | 520 | 520 |
| TTC7A        | 0.109210103 | 0.012708414 | 0.02318608 | 520 | 520 |
| LRRC27       | 0.109104956 | 0.012795028 | 0.02333143 | 520 | 520 |
| KCNJ1        | 0.109100235 | 0.012798928 | 0.02333535 | 520 | 455 |
| RBM26        | 0.109099555 | 0.01279949  | 0.02333535 | 520 | 520 |
| BAZ2B        | 0.109078951 | 0.012816528 | 0.0233643  | 520 | 520 |
| SCN11A       | 0.109022312 | 0.012863469 | 0.02344563 | 520 | 433 |
| PSME4        | 0.108985107 | 0.012894385 | 0.02349985 | 520 | 520 |
| SSTR3        | 0.108949991 | 0.012923626 | 0.02355102 | 520 | 388 |
| PER1         | 0.108923148 | 0.012946017 | 0.02358756 | 520 | 520 |
| PDE9A        | 0.108880841 | 0.012981378 | 0.02364771 | 520 | 520 |
| TM9SF4       | 0.108798081 | 0.013050796 | 0.02376343 | 520 | 520 |
| GPR174       | 0.108783974 | 0.013062661 | 0.02378289 | 520 | 475 |
| SMC1A        | 0.108751189 | 0.013090273 | 0.02382886 | 520 | 520 |
| MUCL1        | 0.108746094 | 0.013094568 | 0.02383452 | 520 | 483 |
| PIGS         | 0.108702164 | 0.013131658 | 0.02389988 | 520 | 520 |
| MID1         | 0.108697698 | 0.013135434 | 0.02390459 | 520 | 520 |
| FOXO3        | 0.108564746 | 0.013248278 | 0.02410544 | 520 | 520 |
| ZMYM5        | 0.108563448 | 0.013249384 | 0.02410544 | 520 | 520 |
| ACSF2        | 0.108543213 | 0.013266634 | 0.02413247 | 520 | 520 |
| NAF1         | 0.108466386 | 0.013332311 | 0.02423508 | 520 | 520 |
| SPATA17      | 0.108454592 | 0.013342418 | 0.02425063 | 520 | 519 |
| RNF138P1     | 0.108424354 | 0.013368363 | 0.02429341 | 520 | 520 |

|           |             |             |            |     |     |
|-----------|-------------|-------------|------------|-----|-----|
| NRIP3     | 0.108411862 | 0.013379095 | 0.02431072 | 520 | 520 |
| USP27X    | 0.108359342 | 0.013424296 | 0.02438846 | 520 | 520 |
| FAM69B    | 0.108348131 | 0.013433962 | 0.02439942 | 520 | 520 |
| PARM1     | 0.108326666 | 0.013452486 | 0.02443006 | 520 | 520 |
| ANKMY2    | 0.108266094 | 0.013504882 | 0.0245194  | 520 | 520 |
| ARL11     | 0.108261574 | 0.013508798 | 0.0245243  | 520 | 520 |
| PDPK1     | 0.108256466 | 0.013513226 | 0.02453013 | 520 | 520 |
| POM121C   | 0.108197617 | 0.013564331 | 0.02461625 | 520 | 520 |
| SLC1A6    | 0.10818332  | 0.013576772 | 0.0246344  | 520 | 332 |
| BRD7P3    | 0.108170327 | 0.013588087 | 0.02464827 | 520 | 363 |
| GAPT      | 0.108149484 | 0.013606255 | 0.02467679 | 520 | 515 |
| LSM14A    | 0.108064457 | 0.013680596 | 0.024796   | 520 | 520 |
| GPR44     | 0.107959797 | 0.013772592 | 0.02495153 | 520 | 499 |
| MYO18A    | 0.107946    | 0.01378476  | 0.02496909 | 520 | 520 |
| CTH       | 0.107939458 | 0.013790533 | 0.02497581 | 520 | 520 |
| HEATR2    | 0.107937417 | 0.013792335 | 0.02497608 | 520 | 520 |
| ZNF765    | 0.107932091 | 0.013797037 | 0.02498235 | 520 | 520 |
| ARID1A    | 0.107922573 | 0.013805443 | 0.02499308 | 520 | 520 |
| ADD3      | 0.107893325 | 0.013831303 | 0.02503765 | 520 | 520 |
| DOCK6     | 0.107859554 | 0.013861216 | 0.02508534 | 520 | 520 |
| PRDX3     | 0.107802932 | 0.013911497 | 0.02517378 | 520 | 520 |
| OR7C1     | 0.107799389 | 0.013914648 | 0.02517722 | 520 | 260 |
| TGIF2     | 0.107745639 | 0.013962536 | 0.0252616  | 520 | 520 |
| NR0B1     | 0.107726119 | 0.013979964 | 0.02529087 | 520 | 208 |
| KCNC3     | 0.107627616 | 0.014068198 | 0.02544136 | 520 | 520 |
| CXCL9     | 0.107615011 | 0.014079524 | 0.02545956 | 520 | 520 |
| PDXP      | 0.107475929 | 0.01420503  | 0.02567053 | 520 | 520 |
| CDKL1     | 0.107475847 | 0.014205104 | 0.02567053 | 520 | 519 |
| IFT172    | 0.107429243 | 0.014247379 | 0.0257377  | 520 | 520 |
| PLIN1     | 0.10740373  | 0.014270568 | 0.02577497 | 520 | 477 |
| TRIM4     | 0.107328951 | 0.01433873  | 0.02589344 | 520 | 520 |
| CD5       | 0.10732612  | 0.014341316 | 0.02589579 | 520 | 520 |
| DOCK9     | 0.107318929 | 0.014347886 | 0.02590533 | 520 | 520 |
| ZNF320    | 0.107298951 | 0.014366156 | 0.02593368 | 520 | 520 |
| JUN       | 0.107192221 | 0.0144641   | 0.02609413 | 520 | 520 |
| CABYR     | 0.107184124 | 0.014471554 | 0.02610291 | 520 | 520 |
| STAG2     | 0.107152842 | 0.014500385 | 0.02615257 | 520 | 520 |
| FRMPD2    | 0.107140679 | 0.014511609 | 0.02617048 | 520 | 259 |
| LOC646851 | 0.107088707 | 0.014559654 | 0.02625242 | 520 | 518 |
| CCDC91    | 0.10703981  | 0.014604984 | 0.02632239 | 520 | 520 |
| P2RY6     | 0.107006011 | 0.014636389 | 0.02636721 | 520 | 520 |
| TBC1D25   | 0.106990196 | 0.014651104 | 0.02639136 | 520 | 520 |
| COPS7A    | 0.106986429 | 0.014654611 | 0.02639532 | 520 | 520 |
| PURA      | 0.10696121  | 0.014678109 | 0.02643528 | 520 | 520 |
| SMTNL1    | 0.106953519 | 0.014685281 | 0.02644583 | 520 | 504 |
| MKL2      | 0.106942567 | 0.0146955   | 0.02646187 | 520 | 520 |

|           |             |             |            |     |     |
|-----------|-------------|-------------|------------|-----|-----|
| RXFP2     | 0.10691529  | 0.014720979 | 0.02649829 | 520 | 29  |
| CNTNAP2   | 0.106911688 | 0.014724347 | 0.02650198 | 520 | 518 |
| C1orf9    | 0.106849568 | 0.014782528 | 0.02660433 | 520 | 520 |
| WFDC3     | 0.106844307 | 0.014787464 | 0.02661084 | 520 | 506 |
| RTP1      | 0.106841198 | 0.014790382 | 0.02661371 | 520 | 302 |
| CCL4      | 0.106835467 | 0.014795762 | 0.02662102 | 520 | 520 |
| SAMD3     | 0.106823825 | 0.014806698 | 0.02663832 | 520 | 512 |
| DZIP3     | 0.106797373 | 0.01483157  | 0.02668068 | 520 | 520 |
| MAPRE1    | 0.106735356 | 0.014890026 | 0.02678345 | 520 | 520 |
| SPG11     | 0.106641259 | 0.014979106 | 0.02693407 | 520 | 520 |
| MORF4L2   | 0.106616074 | 0.015003028 | 0.02697468 | 520 | 520 |
| ZNF432    | 0.106610421 | 0.015008402 | 0.02698194 | 520 | 520 |
| KSR2      | 0.106547566 | 0.015068269 | 0.02707991 | 520 | 498 |
| A1BG      | 0.106526352 | 0.015088522 | 0.02711389 | 520 | 520 |
| RNF26     | 0.106489826 | 0.01512345  | 0.02717181 | 520 | 520 |
| CTTNBP2NL | 0.106479648 | 0.015133194 | 0.02718576 | 520 | 520 |
| OR52L1    | 0.106472972 | 0.01513959  | 0.02719354 | 520 | 80  |
| USP28     | 0.106451579 | 0.015160098 | 0.02722795 | 520 | 520 |
| KIAA0495  | 0.106429015 | 0.015181756 | 0.02725957 | 520 | 520 |
| SCPEP1    | 0.106387137 | 0.015222024 | 0.027327   | 520 | 520 |
| SLC30A5   | 0.106385648 | 0.015223457 | 0.02732714 | 520 | 520 |
| SCN1A     | 0.106372947 | 0.01523569  | 0.02734423 | 520 | 238 |
| HTR2C     | 0.106215863 | 0.015387691 | 0.02759984 | 520 | 345 |
| GTPBP1    | 0.106183721 | 0.015418957 | 0.027651   | 520 | 520 |
| APOBEC3F  | 0.106177704 | 0.015424816 | 0.02765659 | 520 | 520 |
| FER       | 0.106152964 | 0.015448928 | 0.02769243 | 520 | 520 |
| FAM82A1   | 0.106114485 | 0.015486495 | 0.02775237 | 520 | 520 |
| ZC3H12C   | 0.106097227 | 0.01550337  | 0.02777521 | 520 | 520 |
| IL13      | 0.105889566 | 0.015707691 | 0.02812127 | 520 | 294 |
| C10orf90  | 0.105813289 | 0.015783332 | 0.02825418 | 520 | 365 |
| DPP3      | 0.105797704 | 0.015798826 | 0.02827941 | 520 | 520 |
| ELMOD2    | 0.105699778 | 0.015896488 | 0.0284416  | 520 | 520 |
| CDK18     | 0.105671899 | 0.015924388 | 0.02848646 | 520 | 520 |
| SSFA2     | 0.105657671 | 0.015938644 | 0.02850943 | 520 | 520 |
| ZNF213    | 0.105518098 | 0.016079081 | 0.02874278 | 520 | 520 |
| RIMKLB    | 0.105462325 | 0.016135502 | 0.02883342 | 520 | 520 |
| FADD      | 0.105423669 | 0.016174708 | 0.02889835 | 520 | 520 |
| ZNF260    | 0.105415868 | 0.016182631 | 0.02890995 | 520 | 520 |
| PCDHB14   | 0.105373061 | 0.016226164 | 0.02898258 | 520 | 520 |
| GPX3      | 0.105364079 | 0.016235311 | 0.02899635 | 520 | 520 |
| NSD1      | 0.105269668 | 0.016331734 | 0.02915823 | 520 | 520 |
| GJD4      | 0.105198744 | 0.016404498 | 0.02927777 | 520 | 256 |
| HGC6.3    | 0.105178421 | 0.016425401 | 0.02930989 | 520 | 223 |
| ZNF197    | 0.105126717 | 0.016478685 | 0.02939197 | 520 | 520 |
| SLC33A1   | 0.105103398 | 0.016502766 | 0.02942971 | 520 | 520 |
| STON2     | 0.105020665 | 0.016588452 | 0.02956944 | 520 | 520 |

|          |             |             |            |     |     |
|----------|-------------|-------------|------------|-----|-----|
| ELOVL3   | 0.105012819 | 0.016596599 | 0.02958109 | 520 | 512 |
| COL28A1  | 0.104984571 | 0.016625956 | 0.02962582 | 520 | 480 |
| PLEKHF1  | 0.104976583 | 0.016634266 | 0.02963801 | 520 | 520 |
| THRAP3   | 0.104953143 | 0.016658673 | 0.02967497 | 520 | 520 |
| HOXB8    | 0.10495242  | 0.016659426 | 0.02967497 | 520 | 421 |
| NEK3     | 0.104950561 | 0.016661362 | 0.0296758  | 520 | 520 |
| RABL2B   | 0.104855086 | 0.016761112 | 0.02984292 | 520 | 520 |
| S100Z    | 0.104826401 | 0.016791183 | 0.02989118 | 520 | 358 |
| NOL9     | 0.104730733 | 0.016891815 | 0.0300491  | 520 | 520 |
| CCDC70   | 0.104705028 | 0.016918943 | 0.0300947  | 520 | 63  |
| STARD4   | 0.104684844 | 0.016940271 | 0.03012733 | 520 | 520 |
| NLGN4Y   | 0.104682777 | 0.016942457 | 0.03012856 | 520 | 441 |
| VAMP7    | 0.104629974 | 0.016998372 | 0.03021999 | 520 | 520 |
| FGD1     | 0.104614878 | 0.017014387 | 0.0302458  | 520 | 520 |
| VWA5A    | 0.104579155 | 0.017052338 | 0.03031059 | 520 | 520 |
| TNKS1BP1 | 0.10455408  | 0.017079021 | 0.03034999 | 520 | 520 |
| GMIP     | 0.104535307 | 0.017099022 | 0.03037483 | 520 | 520 |
| ZNF350   | 0.104466131 | 0.0171729   | 0.03049297 | 520 | 520 |
| ZFAT     | 0.104465415 | 0.017173666 | 0.03049297 | 520 | 520 |
| MT1DP    | 0.10446454  | 0.017174602 | 0.03049297 | 520 | 401 |
| ACSL6    | 0.1044253   | 0.017216636 | 0.03055953 | 520 | 489 |
| ZNF100   | 0.104324729 | 0.017324781 | 0.03074066 | 520 | 519 |
| STXBP5   | 0.10432287  | 0.017326786 | 0.03074151 | 520 | 520 |
| CT45A4   | 0.104297198 | 0.017354488 | 0.03078    | 520 | 107 |
| NTSR1    | 0.104247186 | 0.017408568 | 0.03086607 | 520 | 489 |
| CTF1     | 0.104247157 | 0.0174086   | 0.03086607 | 520 | 520 |
| KIAA1409 | 0.104246494 | 0.017409318 | 0.03086607 | 520 | 504 |
| CD1E     | 0.104235126 | 0.017421632 | 0.03088262 | 520 | 513 |
| KIAA0195 | 0.104217647 | 0.017440579 | 0.03091349 | 520 | 520 |
| BDP1     | 0.104150877 | 0.017513126 | 0.03103117 | 520 | 520 |
| SLC2A9   | 0.10413594  | 0.017529391 | 0.03105726 | 520 | 520 |
| XPO4     | 0.104014091 | 0.017662571 | 0.03127536 | 520 | 520 |
| GIP      | 0.103994137 | 0.017684465 | 0.03130686 | 520 | 106 |
| SCAND3   | 0.103920544 | 0.017765416 | 0.03142848 | 520 | 467 |
| ERC2     | 0.103895737 | 0.017792776 | 0.03147412 | 520 | 512 |
| SHROOM3  | 0.103889651 | 0.017799494 | 0.03148281 | 520 | 520 |
| ZNF177   | 0.1038627   | 0.017829271 | 0.03153038 | 520 | 519 |
| RHBDF2   | 0.103852295 | 0.017840778 | 0.0315457  | 520 | 520 |
| SLC22A2  | 0.103845728 | 0.017848044 | 0.03155528 | 520 | 301 |
| SRD5A2   | 0.103818952 | 0.017877698 | 0.03160494 | 520 | 406 |
| P4HB     | 0.103805334 | 0.017892796 | 0.03162885 | 520 | 520 |
| TPCN2    | 0.103785448 | 0.017914863 | 0.03165676 | 520 | 520 |
| AP4E1    | 0.103767228 | 0.017935102 | 0.03168975 | 520 | 520 |
| C10orf46 | 0.10374111  | 0.017964149 | 0.03172717 | 520 | 520 |
| ESX1     | 0.103711124 | 0.01799755  | 0.03178059 | 520 | 66  |
| PCDHA13  | 0.103681095 | 0.018031052 | 0.03183696 | 520 | 139 |

|           |             |             |            |     |     |
|-----------|-------------|-------------|------------|-----|-----|
| G2E3      | 0.103645425 | 0.018070918 | 0.03189618 | 520 | 520 |
| ERLIN2    | 0.103615369 | 0.01810457  | 0.03194999 | 520 | 520 |
| CD300LD   | 0.103613872 | 0.018106247 | 0.03195015 | 520 | 53  |
| KLRD1     | 0.103580204 | 0.018144011 | 0.03201399 | 520 | 515 |
| ZNF121    | 0.103565288 | 0.018160764 | 0.03204074 | 520 | 520 |
| TAS2R40   | 0.103543817 | 0.018184902 | 0.03207772 | 520 | 106 |
| FUT10     | 0.10349551  | 0.018239312 | 0.03216807 | 520 | 520 |
| PPP2R3C   | 0.103449355 | 0.018291432 | 0.03225435 | 520 | 520 |
| LOC285733 | 0.103378973 | 0.01837116  | 0.03239133 | 520 | 102 |
| MS4A3     | 0.103376987 | 0.018373414 | 0.03239133 | 520 | 203 |
| IFNA1     | 0.10337591  | 0.018374636 | 0.03239133 | 520 | 235 |
| ADAMTSL3  | 0.103375114 | 0.01837554  | 0.03239133 | 520 | 511 |
| DCP1A     | 0.103326825 | 0.018430427 | 0.03247956 | 520 | 520 |
| HOMER3    | 0.103247376 | 0.018521044 | 0.03263355 | 520 | 520 |
| HCFC1R1   | 0.103186527 | 0.018590709 | 0.03274674 | 520 | 520 |
| CCNG2     | 0.103185591 | 0.018591783 | 0.03274674 | 520 | 520 |
| OR2W1     | 0.103154975 | 0.018626922 | 0.03280577 | 520 | 3   |
| C16orf71  | 0.10309942  | 0.018690834 | 0.03291258 | 520 | 518 |
| RNASEN    | 0.103079416 | 0.018713894 | 0.03294743 | 520 | 520 |
| GCN1L1    | 0.103042686 | 0.018756299 | 0.03301081 | 520 | 520 |
| PKM2      | 0.103042564 | 0.018756441 | 0.03301081 | 520 | 520 |
| PPP1R9A   | 0.103036781 | 0.018763125 | 0.03301969 | 520 | 486 |
| CD74      | 0.103014571 | 0.018788816 | 0.03305337 | 520 | 520 |
| MAPKAPK2  | 0.102911062 | 0.018908952 | 0.03324151 | 520 | 520 |
| C1orf26   | 0.102878214 | 0.018947216 | 0.03330297 | 520 | 520 |
| KPNB1     | 0.102874689 | 0.018951326 | 0.03330729 | 520 | 520 |
| PPARA     | 0.102812567 | 0.01902389  | 0.03342349 | 520 | 520 |
| ZNF536    | 0.102812411 | 0.019024073 | 0.03342349 | 520 | 321 |
| THAP1     | 0.102790824 | 0.019049345 | 0.03346498 | 520 | 520 |
| RAB27A    | 0.102751722 | 0.019095197 | 0.0335426  | 520 | 520 |
| TPBG      | 0.102745657 | 0.019102317 | 0.03354927 | 520 | 520 |
| FLJ13224  | 0.102735345 | 0.01911443  | 0.03356762 | 520 | 481 |
| SIRT4     | 0.102727517 | 0.019123628 | 0.03358084 | 520 | 519 |
| ATP2B2    | 0.102677173 | 0.019182881 | 0.03367903 | 520 | 474 |
| KDM5B     | 0.102634032 | 0.019233783 | 0.03376251 | 520 | 520 |
| RFPL4A    | 0.102627661 | 0.019241311 | 0.03377279 | 520 | 231 |
| TM4SF19   | 0.102625265 | 0.019244142 | 0.03377482 | 520 | 518 |
| HSF1      | 0.102523206 | 0.019365088 | 0.03396639 | 520 | 520 |
| RAB28     | 0.102512328 | 0.019378018 | 0.03398611 | 520 | 520 |
| ZNF148    | 0.102492125 | 0.019402052 | 0.03402531 | 520 | 520 |
| DDX18     | 0.102484306 | 0.019411361 | 0.03403867 | 520 | 520 |
| ADRB3     | 0.102450186 | 0.019452027 | 0.03410405 | 520 | 385 |
| C6orf27   | 0.102417047 | 0.019491596 | 0.03416441 | 520 | 518 |
| UBXN4     | 0.102415675 | 0.019493235 | 0.03416441 | 520 | 520 |
| MFHAS1    | 0.102405468 | 0.019505437 | 0.03417689 | 520 | 520 |
| RELL1     | 0.102388707 | 0.019525488 | 0.03420608 | 520 | 520 |



|           |             |             |            |     |     |
|-----------|-------------|-------------|------------|-----|-----|
| COL17A1   | 0.102359331 | 0.019560676 | 0.03426474 | 520 | 520 |
| KCNQ5     | 0.102337873 | 0.019586413 | 0.03430387 | 520 | 520 |
| APOC1P1   | 0.102302499 | 0.019628906 | 0.0343753  | 520 | 178 |
| GRIA2     | 0.102287745 | 0.019646653 | 0.0344034  | 520 | 297 |
| CNOT6L    | 0.102255439 | 0.019685562 | 0.03446255 | 520 | 520 |
| MID2      | 0.102229117 | 0.019717312 | 0.03451214 | 520 | 520 |
| FLJ41941  | 0.102222089 | 0.019725797 | 0.03452201 | 520 | 406 |
| PTN       | 0.102221613 | 0.019726372 | 0.03452201 | 520 | 520 |
| CLPTM1L   | 0.102200715 | 0.019751622 | 0.0345632  | 520 | 520 |
| FAM169A   | 0.102185682 | 0.019769803 | 0.03459201 | 520 | 520 |
| TTLL11    | 0.102102601 | 0.019870546 | 0.03475831 | 520 | 520 |
| PTPRN2    | 0.102101616 | 0.019871742 | 0.03475831 | 520 | 520 |
| ESD       | 0.102069084 | 0.019911314 | 0.03482149 | 520 | 520 |
| LOC652276 | 0.102042323 | 0.019943917 | 0.03487548 | 520 | 520 |
| FAF2      | 0.102021044 | 0.019969875 | 0.03491481 | 520 | 520 |
| HYI       | 0.101712394 | 0.020349704 | 0.03553576 | 520 | 520 |
| CNTN5     | 0.101707379 | 0.020355926 | 0.03554355 | 520 | 374 |
| FGFR1OP2  | 0.101677934 | 0.020392497 | 0.03560432 | 520 | 520 |
| LASS5     | 0.101676337 | 0.020394483 | 0.03560471 | 520 | 520 |
| POM121L1P | 0.101601583 | 0.020487593 | 0.03575797 | 520 | 409 |
| RORA      | 0.101547084 | 0.020555709 | 0.03586754 | 520 | 520 |
| PDLIM4    | 0.101531472 | 0.020575258 | 0.03589855 | 520 | 520 |
| STK33     | 0.101495582 | 0.020620259 | 0.03597395 | 520 | 483 |
| QSER1     | 0.101478606 | 0.020641574 | 0.0360049  | 520 | 520 |
| HTR3E     | 0.101360412 | 0.020790512 | 0.03624588 | 520 | 313 |
| DPYS      | 0.101289286 | 0.020880589 | 0.03639977 | 520 | 346 |
| CT45A3    | 0.101172953 | 0.021028648 | 0.03664837 | 520 | 121 |
| ORAI3     | 0.101166394 | 0.021037024 | 0.0366598  | 520 | 520 |
| PTCRA     | 0.101156264 | 0.021049964 | 0.03667918 | 520 | 453 |
| IMPG1     | 0.101127727 | 0.021086454 | 0.03673959 | 520 | 433 |
| LOC644172 | 0.101110352 | 0.0211087   | 0.03677199 | 520 | 520 |
| SRP72     | 0.101099176 | 0.021123018 | 0.03679058 | 520 | 520 |
| GPR39     | 0.101046492 | 0.021190632 | 0.03690516 | 520 | 519 |
| DUSP15    | 0.101036322 | 0.021203706 | 0.03692155 | 520 | 515 |
| BARD1     | 0.101032111 | 0.021209121 | 0.03692779 | 520 | 519 |
| GADD45A   | 0.101020238 | 0.021224396 | 0.03695119 | 520 | 520 |
| PCIF1     | 0.100967233 | 0.021292707 | 0.03706372 | 520 | 520 |
| C15orf59  | 0.100944005 | 0.021322701 | 0.03710952 | 520 | 517 |
| C12orf24  | 0.100923174 | 0.021349632 | 0.03715319 | 520 | 520 |
| KDM4A     | 0.100879449 | 0.021406257 | 0.0372453  | 520 | 520 |
| LIMD2     | 0.100802172 | 0.021506653 | 0.03740707 | 520 | 520 |
| PTPRT     | 0.100788241 | 0.021524794 | 0.03743539 | 520 | 421 |
| TTC30A    | 0.100756325 | 0.021566408 | 0.03750453 | 520 | 520 |
| DDX10     | 0.100668865 | 0.0216808   | 0.03768721 | 520 | 520 |
| MSI2      | 0.100645064 | 0.021712022 | 0.03773823 | 520 | 520 |
| PTCH1     | 0.100595388 | 0.021777311 | 0.03783866 | 520 | 520 |

|           |             |             |            |     |     |
|-----------|-------------|-------------|------------|-----|-----|
| SERINC2   | 0.100546452 | 0.021841793 | 0.03794416 | 520 | 520 |
| CCDC93    | 0.100489933 | 0.021916474 | 0.03806406 | 520 | 520 |
| ZNF518B   | 0.100469494 | 0.021943535 | 0.0381045  | 520 | 520 |
| NRG3      | 0.100404304 | 0.022030041 | 0.03824154 | 520 | 286 |
| SOX12     | 0.100401339 | 0.022033983 | 0.03824509 | 520 | 520 |
| MOBP      | 0.100322816 | 0.022138589 | 0.03841343 | 520 | 365 |
| HLA-L     | 0.100299599 | 0.022169601 | 0.03846393 | 520 | 520 |
| SMAD2     | 0.100276113 | 0.022201011 | 0.0385118  | 520 | 520 |
| LGALS3BP  | 0.100272079 | 0.02220641  | 0.03851785 | 520 | 520 |
| OR7E5P    | 0.100266467 | 0.022213922 | 0.03852757 | 520 | 106 |
| ZNF280C   | 0.100240169 | 0.022249156 | 0.03858536 | 520 | 519 |
| KLF15     | 0.10019439  | 0.022310605 | 0.03868527 | 520 | 512 |
| PPP3CC    | 0.100106894 | 0.022428461 | 0.03888294 | 520 | 520 |
| PIK3C3    | 0.100073614 | 0.02247343  | 0.0389542  | 520 | 520 |
| ZNF8      | 0.100029408 | 0.022533283 | 0.03904919 | 520 | 520 |
| SLC12A5   | 0.100028849 | 0.022534041 | 0.03904919 | 520 | 487 |
| LIMK2     | 0.099954385 | 0.022635179 | 0.03920424 | 520 | 520 |
| EEA1      | 0.099936467 | 0.022659574 | 0.03924312 | 520 | 520 |
| LOC651250 | 0.099931965 | 0.022665707 | 0.03925037 | 520 | 520 |
| MAPRE3    | 0.09990222  | 0.022706264 | 0.03931723 | 520 | 520 |
| LECT2     | 0.099888648 | 0.022724791 | 0.03934255 | 520 | 82  |
| ALB       | 0.099835149 | 0.022797946 | 0.03946581 | 520 | 384 |
| FAM170B   | 0.099832042 | 0.022802201 | 0.03946979 | 520 | 130 |
| HEATR4    | 0.099778407 | 0.022875758 | 0.03958352 | 520 | 488 |
| LRFN4     | 0.099772283 | 0.02288417  | 0.03959128 | 520 | 520 |
| HSPH1     | 0.099722189 | 0.022953079 | 0.03969347 | 520 | 520 |
| DDX60L    | 0.099680831 | 0.023010106 | 0.03978527 | 520 | 520 |
| RBM15B    | 0.09964816  | 0.023055242 | 0.03985989 | 520 | 520 |
| MCOLN2    | 0.099536174 | 0.023210534 | 0.04010466 | 520 | 520 |
| ABP1      | 0.099535637 | 0.023211281 | 0.04010466 | 520 | 520 |
| DNASE2    | 0.099528896 | 0.023220659 | 0.04011492 | 520 | 520 |
| TCEAL2    | 0.099463221 | 0.023312186 | 0.04026959 | 520 | 478 |
| RPL7      | 0.09943499  | 0.023351627 | 0.04032735 | 520 | 520 |
| RGS13     | 0.099431433 | 0.023356599 | 0.04033015 | 520 | 479 |
| THUMPD1   | 0.099427749 | 0.023361752 | 0.04033448 | 520 | 520 |
| ZNF483    | 0.099415638 | 0.023378695 | 0.04036027 | 520 | 512 |
| C9orf153  | 0.099372549 | 0.023439065 | 0.04046103 | 520 | 322 |
| HEBP1     | 0.099334223 | 0.023492873 | 0.0405435  | 520 | 520 |
| LEFTY1    | 0.099332528 | 0.023495256 | 0.04054415 | 520 | 488 |
| KDM1B     | 0.099322085 | 0.023509938 | 0.04056254 | 520 | 520 |
| C21orf130 | 0.099291219 | 0.023553378 | 0.04063053 | 520 | 379 |
| GALNT8    | 0.099271405 | 0.023581301 | 0.04067522 | 520 | 257 |
| FRRS1     | 0.099168671 | 0.023726537 | 0.04090125 | 520 | 520 |
| AHI1      | 0.099164982 | 0.023731766 | 0.04090327 | 520 | 520 |
| ALG9      | 0.099122015 | 0.02379275  | 0.04100137 | 520 | 520 |
| OSBPL3    | 0.099035347 | 0.023916171 | 0.04120701 | 520 | 520 |

|              |             |             |            |     |     |
|--------------|-------------|-------------|------------|-----|-----|
| ADAM32       | 0.099006526 | 0.023957338 | 0.04126736 | 520 | 511 |
| GPR112       | 0.098994836 | 0.023974053 | 0.04129263 | 520 | 131 |
| CCNYL1       | 0.09898649  | 0.023985992 | 0.04130966 | 520 | 520 |
| ZCWPW2       | 0.098983475 | 0.023990307 | 0.04131357 | 520 | 519 |
| RPTOR        | 0.098981073 | 0.023993744 | 0.04131596 | 520 | 520 |
| SDPR         | 0.09897024  | 0.024009253 | 0.04133913 | 520 | 520 |
| CXorf23      | 0.098966642 | 0.024014406 | 0.04134447 | 520 | 520 |
| NXF2         | 0.098800941 | 0.024252761 | 0.04174058 | 520 | 147 |
| TUBA8        | 0.098699884 | 0.02439913  | 0.041971   | 520 | 520 |
| HHIPL2       | 0.09868351  | 0.024422917 | 0.04200833 | 520 | 476 |
| GSK3B        | 0.098615446 | 0.024522012 | 0.04217159 | 520 | 520 |
| CLSPN        | 0.098613648 | 0.024524635 | 0.0421725  | 520 | 520 |
| PAX5         | 0.098576452 | 0.02457894  | 0.04225868 | 520 | 498 |
| INF2         | 0.098508584 | 0.024678296 | 0.04241142 | 520 | 520 |
| APOBEC3G     | 0.098435804 | 0.024785226 | 0.04257704 | 520 | 520 |
| FOXL2        | 0.098381982 | 0.02486456  | 0.04270241 | 520 | 510 |
| AGRP         | 0.098373425 | 0.024877194 | 0.04271683 | 520 | 183 |
| LOC284232    | 0.098328809 | 0.024943153 | 0.0428228  | 520 | 518 |
| CCND2        | 0.098309819 | 0.024971272 | 0.04286377 | 520 | 520 |
| FBXL20       | 0.098296667 | 0.024990764 | 0.04289358 | 520 | 520 |
| LIG4         | 0.098244254 | 0.025068571 | 0.04301614 | 520 | 520 |
| FBXL5        | 0.09818201  | 0.025161244 | 0.04316781 | 520 | 520 |
| PAGE2        | 0.098154751 | 0.025201922 | 0.04322657 | 520 | 120 |
| MRE11A       | 0.098143129 | 0.025219283 | 0.04325267 | 520 | 520 |
| APOL5        | 0.098116682 | 0.025258826 | 0.0433113  | 520 | 196 |
| IMPACT       | 0.098115957 | 0.025259911 | 0.0433113  | 520 | 520 |
| GTF3C3       | 0.098104334 | 0.025277307 | 0.04333744 | 520 | 520 |
| SHBG         | 0.098100429 | 0.025283154 | 0.04334378 | 520 | 487 |
| LOC100130386 | 0.098091653 | 0.025296299 | 0.04335894 | 520 | 170 |
| MAG          | 0.098079302 | 0.025314809 | 0.04338698 | 520 | 305 |
| UBE2D4       | 0.098032382 | 0.02538523  | 0.04349289 | 520 | 520 |
| RNF14        | 0.098015104 | 0.025411205 | 0.04352999 | 520 | 520 |
| C2orf18      | 0.097999915 | 0.025434058 | 0.04356544 | 520 | 520 |
| PSORS1C1     | 0.097990458 | 0.025448295 | 0.04358242 | 520 | 501 |
| FRMD4B       | 0.09795821  | 0.025496899 | 0.04365454 | 520 | 520 |
| UAP1L1       | 0.097933871 | 0.025533633 | 0.04371001 | 520 | 520 |
| DHRS2        | 0.097902165 | 0.025581557 | 0.04378461 | 520 | 518 |
| HAMP         | 0.097766542 | 0.025787425 | 0.04410955 | 520 | 498 |
| NBPF14       | 0.097765571 | 0.025788904 | 0.04410955 | 520 | 520 |
| CXCL13       | 0.097720484 | 0.025857662 | 0.0442234  | 520 | 520 |
| LANCL1       | 0.09770578  | 0.025880121 | 0.04425055 | 520 | 520 |
| NOSTRIN      | 0.097698078 | 0.025891892 | 0.04426692 | 520 | 520 |
| GPR152       | 0.097695403 | 0.02589598  | 0.04427016 | 520 | 208 |
| ARL13A       | 0.097675634 | 0.025926217 | 0.04431809 | 520 | 359 |
| SEMA4G       | 0.097671801 | 0.025932083 | 0.04432436 | 520 | 519 |
| ZNHIT6       | 0.09762906  | 0.025997572 | 0.04442741 | 520 | 520 |

|           |             |             |            |     |     |
|-----------|-------------|-------------|------------|-----|-----|
| ERCC6     | 0.097609109 | 0.02602819  | 0.04447355 | 520 | 520 |
| HOXC10    | 0.097576464 | 0.026078356 | 0.04454795 | 520 | 499 |
| NRBP1     | 0.097546217 | 0.026124912 | 0.04461614 | 520 | 520 |
| SCN2A     | 0.097544596 | 0.02612741  | 0.04461662 | 520 | 479 |
| ARSA      | 0.097525049 | 0.026157536 | 0.0446605  | 520 | 520 |
| GSG1      | 0.097477171 | 0.026231455 | 0.04478292 | 520 | 279 |
| C2orf86   | 0.097456999 | 0.026262653 | 0.04482859 | 520 | 520 |
| SYNJ2BP   | 0.097437593 | 0.026292695 | 0.04487227 | 520 | 520 |
| CDC5L     | 0.097418774 | 0.026321857 | 0.04491824 | 520 | 520 |
| C17orf54  | 0.097404242 | 0.026344396 | 0.0449529  | 520 | 110 |
| CENPI     | 0.097391779 | 0.026363738 | 0.04497829 | 520 | 519 |
| SERPINA4  | 0.097389817 | 0.026366785 | 0.04497968 | 520 | 194 |
| CNTNAP4   | 0.097326351 | 0.026465484 | 0.04514191 | 520 | 303 |
| CEP350    | 0.097325788 | 0.026466361 | 0.04514191 | 520 | 520 |
| RAP2C     | 0.09732133  | 0.026473306 | 0.04514994 | 520 | 520 |
| GPR142    | 0.097307604 | 0.0264947   | 0.04517496 | 520 | 243 |
| WDR6      | 0.097215189 | 0.026639125 | 0.0454097  | 520 | 520 |
| ZNF295    | 0.097172874 | 0.026705481 | 0.04550886 | 520 | 520 |
| SOX10     | 0.097172335 | 0.026706326 | 0.04550886 | 520 | 458 |
| TOP1      | 0.09715483  | 0.026733819 | 0.04555186 | 520 | 520 |
| MADD      | 0.097145905 | 0.026747846 | 0.04557191 | 520 | 520 |
| CT45A2    | 0.09713989  | 0.026757303 | 0.04557647 | 520 | 159 |
| C6orf142  | 0.097093383 | 0.026830519 | 0.04569212 | 520 | 510 |
| UBE2D1    | 0.097092443 | 0.026831999 | 0.04569212 | 520 | 520 |
| ATP6V0A2  | 0.097075487 | 0.026858738 | 0.04572993 | 520 | 520 |
| ANKRD11   | 0.09705379  | 0.026892985 | 0.04578377 | 520 | 520 |
| ZNF230    | 0.097034533 | 0.026923412 | 0.04582844 | 520 | 520 |
| TG        | 0.096994207 | 0.026987226 | 0.04592931 | 520 | 518 |
| TAS2R19   | 0.09699072  | 0.02699275  | 0.04593483 | 520 | 324 |
| OGG1      | 0.096895102 | 0.027144607 | 0.04617377 | 520 | 520 |
| PKD1L2    | 0.096883449 | 0.027163166 | 0.04620144 | 520 | 444 |
| NT5DC3    | 0.096881257 | 0.027166657 | 0.04620348 | 520 | 520 |
| CACNG5    | 0.096842525 | 0.027228422 | 0.04630462 | 520 | 138 |
| PLA2G16   | 0.096736903 | 0.027397469 | 0.04656854 | 520 | 520 |
| SAMD9L    | 0.096723852 | 0.02741842  | 0.04660022 | 520 | 520 |
| JPH1      | 0.096669561 | 0.027505721 | 0.04673284 | 520 | 519 |
| MAN2A2    | 0.096663373 | 0.027563469 | 0.04682307 | 520 | 520 |
| OXT       | 0.096527643 | 0.027735057 | 0.04707885 | 520 | 300 |
| TRPM2     | 0.096525678 | 0.027738244 | 0.0470803  | 520 | 520 |
| FAM86C    | 0.096503483 | 0.027774263 | 0.0471335  | 520 | 520 |
| TP53BP2   | 0.09649556  | 0.02778713  | 0.04715137 | 520 | 520 |
| TPSB2     | 0.09647841  | 0.027815    | 0.04719469 | 520 | 520 |
| LOC92973  | 0.096449002 | 0.027862846 | 0.04726394 | 520 | 477 |
| PITX2     | 0.096342288 | 0.02803706  | 0.04753547 | 520 | 509 |
| IMPDH1    | 0.096309826 | 0.028090242 | 0.04762163 | 520 | 520 |
| LOC158696 | 0.096270488 | 0.028154804 | 0.04772306 | 520 | 312 |

|              |             |             |            |     |     |
|--------------|-------------|-------------|------------|-----|-----|
| OXER1        | 0.09624883  | 0.028190403 | 0.04777938 | 520 | 518 |
| SUPT6H       | 0.096245078 | 0.028196575 | 0.04778582 | 520 | 520 |
| LOC100128542 | 0.096241769 | 0.028202018 | 0.04779103 | 520 | 201 |
| PIWIL2       | 0.096131631 | 0.028383717 | 0.04808278 | 520 | 482 |
| HOXC6        | 0.096129691 | 0.028386926 | 0.04808417 | 520 | 517 |
| OR6C3        | 0.096079968 | 0.028469294 | 0.04821154 | 520 | 29  |
| SLC7A5P2     | 0.096054076 | 0.028512266 | 0.0482762  | 520 | 485 |
| SCG3         | 0.096048293 | 0.028521871 | 0.04828841 | 520 | 407 |
| SDCCAG8      | 0.096016791 | 0.028574243 | 0.04837302 | 520 | 520 |
| C1orf229     | 0.095994895 | 0.028610695 | 0.04843066 | 520 | 435 |
| ZNF160       | 0.095970782 | 0.028650883 | 0.04849055 | 520 | 520 |
| KIAA2018     | 0.095938052 | 0.028705509 | 0.04857077 | 520 | 520 |
| C9orf144B    | 0.09589768  | 0.028773015 | 0.04867274 | 520 | 386 |
| USP38        | 0.095883433 | 0.02879687  | 0.04870901 | 520 | 520 |
| CIDEC        | 0.095835497 | 0.028877257 | 0.0488286  | 520 | 384 |
| ICA1L        | 0.09577663  | 0.028976238 | 0.04898364 | 520 | 520 |
| COL9A2       | 0.095683823 | 0.029132878 | 0.0492278  | 520 | 520 |
| HLCS         | 0.09565725  | 0.029177862 | 0.04929555 | 520 | 520 |
| DCTD         | 0.095652805 | 0.029185393 | 0.04930414 | 520 | 520 |
| OMG          | 0.095612892 | 0.029253085 | 0.04940608 | 520 | 453 |
| RYK          | 0.095563927 | 0.029336314 | 0.04953835 | 520 | 520 |
| ADAM21P1     | 0.095536354 | 0.029383272 | 0.04960934 | 520 | 339 |
| MYO15A       | 0.095508602 | 0.029430599 | 0.04967676 | 520 | 514 |
| LOC728024    | 0.095498524 | 0.029447802 | 0.0496975  | 520 | 520 |
| XPNPEP3      | 0.095498516 | 0.029447815 | 0.0496975  | 520 | 520 |
| FERMT1       | 0.095385757 | 0.029640879 | 0.0500024  | 520 | 520 |
| UAP1         | 0.09538297  | 0.029645666 | 0.05000629 | 520 | 520 |
| FCRL3        | 0.095365211 | 0.029676175 | 0.05005357 | 520 | 499 |
| ACSL1        | 0.095342978 | 0.029714409 | 0.05011059 | 520 | 520 |
| SMOX         | 0.095342661 | 0.029714955 | 0.05011059 | 520 | 520 |
| BCL2         | 0.095304783 | 0.029780192 | 0.05020381 | 520 | 520 |
| SP100        | 0.095287323 | 0.029810303 | 0.05025037 | 520 | 520 |
| TAX1BP1      | 0.095245735 | 0.029882134 | 0.05036724 | 520 | 520 |
| ZNF876P      | 0.09521083  | 0.029942535 | 0.05045318 | 520 | 510 |
| APLF         | 0.095210488 | 0.029943128 | 0.05045318 | 520 | 520 |
| CCDC152      | 0.095188442 | 0.029981332 | 0.05050489 | 520 | 519 |
| KCNH2        | 0.095151204 | 0.030045958 | 0.0506053  | 520 | 516 |
| ENTPD4       | 0.095069122 | 0.03018883  | 0.05082471 | 520 | 520 |
| RAD50        | 0.095066477 | 0.030193444 | 0.05082824 | 520 | 520 |
| SNAP47       | 0.095044976 | 0.030230971 | 0.05087867 | 520 | 520 |
| C14orf145    | 0.095041558 | 0.03023694  | 0.05088446 | 520 | 520 |
| ZFYVE9       | 0.095038469 | 0.030242335 | 0.0508854  | 520 | 520 |
| NEFL         | 0.094964007 | 0.030372647 | 0.05108726 | 520 | 518 |
| LRFN1        | 0.094938258 | 0.030417819 | 0.0511547  | 520 | 519 |
| SLC9A3R2     | 0.09490625  | 0.030474053 | 0.05122791 | 520 | 520 |
| MDS2         | 0.094853876 | 0.03056626  | 0.05137863 | 520 | 376 |

|              |             |             |            |     |     |
|--------------|-------------|-------------|------------|-----|-----|
| BCAM         | 0.094839848 | 0.030590997 | 0.05141164 | 520 | 520 |
| TMEM66       | 0.094809257 | 0.030645002 | 0.05148953 | 520 | 520 |
| FAM26F       | 0.094757576 | 0.030736424 | 0.05162501 | 520 | 520 |
| C6orf165     | 0.094720488 | 0.030802175 | 0.05172775 | 520 | 509 |
| DHRS7C       | 0.094714399 | 0.030812981 | 0.05174159 | 520 | 195 |
| KCNH7        | 0.094643925 | 0.030938289 | 0.05193903 | 520 | 215 |
| LILRA4       | 0.094636495 | 0.030951527 | 0.05195693 | 520 | 503 |
| RAB6C        | 0.094505866 | 0.031185035 | 0.05231406 | 520 | 520 |
| C11orf49     | 0.094387963 | 0.031397087 | 0.05266541 | 520 | 520 |
| ZNF585A      | 0.094381879 | 0.031408063 | 0.05267944 | 520 | 520 |
| PAGE5        | 0.094380049 | 0.031411366 | 0.05268059 | 520 | 175 |
| HOXA1        | 0.094356756 | 0.031453421 | 0.0527292  | 520 | 520 |
| MTHFD1L      | 0.094347469 | 0.031470202 | 0.05275294 | 520 | 520 |
| EDA          | 0.094270311 | 0.031609917 | 0.05296513 | 520 | 520 |
| NOMO3        | 0.09426618  | 0.031617412 | 0.05297329 | 520 | 520 |
| CCDC74A      | 0.094228685 | 0.031685512 | 0.05307856 | 520 | 520 |
| PRDX4        | 0.09409786  | 0.031924105 | 0.05344717 | 520 | 520 |
| GRLF1        | 0.094093784 | 0.031931564 | 0.05345521 | 520 | 520 |
| CPNE3        | 0.094079826 | 0.031957115 | 0.05349355 | 520 | 520 |
| SPOCK2       | 0.094074039 | 0.031967715 | 0.05350504 | 520 | 520 |
| HLA-DRB5     | 0.094072436 | 0.031970651 | 0.05350504 | 520 | 520 |
| ZC3H14       | 0.09403846  | 0.032032942 | 0.05359378 | 520 | 520 |
| BAT2L2       | 0.093968812 | 0.03216096  | 0.05379904 | 520 | 520 |
| RPS6KA6      | 0.093919521 | 0.032251825 | 0.05393761 | 520 | 356 |
| CAPZA3       | 0.093771337 | 0.032526313 | 0.05436059 | 520 | 170 |
| TPM3         | 0.093718978 | 0.032623776 | 0.05451445 | 520 | 520 |
| GNAT2        | 0.093705106 | 0.03264964  | 0.05454862 | 520 | 442 |
| HAND1        | 0.093668374 | 0.032718208 | 0.0546496  | 520 | 195 |
| IFT81        | 0.093619496 | 0.032809642 | 0.05477963 | 520 | 520 |
| GOLGA2       | 0.093554952 | 0.032930716 | 0.05497268 | 520 | 520 |
| PSIMCT-1     | 0.093543457 | 0.032952319 | 0.05499508 | 520 | 514 |
| MAGEC2       | 0.093527454 | 0.032982414 | 0.05504075 | 520 | 209 |
| C19orf71     | 0.093516835 | 0.033002397 | 0.05506821 | 520 | 515 |
| POM121       | 0.093515806 | 0.033004332 | 0.05506821 | 520 | 520 |
| CPSF1        | 0.093482263 | 0.033067523 | 0.05516908 | 520 | 520 |
| MORC2        | 0.09344222  | 0.033143095 | 0.05528144 | 520 | 520 |
| LOC100190986 | 0.093376716 | 0.033267038 | 0.05548277 | 520 | 520 |
| ADAM29       | 0.093308064 | 0.03339736  | 0.05568712 | 520 | 178 |
| ZKSCAN3      | 0.093298718 | 0.033415135 | 0.05571215 | 520 | 520 |
| TRIM59       | 0.093256205 | 0.033496093 | 0.0558379  | 520 | 520 |
| LOC554202    | 0.093238141 | 0.033530543 | 0.05588609 | 520 | 516 |
| BAZ2A        | 0.09323221  | 0.033541861 | 0.05589571 | 520 | 520 |
| TSHZ1        | 0.093116701 | 0.033762927 | 0.05625481 | 520 | 520 |
| SH2D4B       | 0.093106447 | 0.033782612 | 0.0562783  | 520 | 500 |
| LOC442459    | 0.093074003 | 0.033844959 | 0.05635889 | 520 | 519 |
| C4orf41      | 0.093030147 | 0.03392939  | 0.05648812 | 520 | 520 |

|           |             |             |            |     |     |
|-----------|-------------|-------------|------------|-----|-----|
| ACTR1A    | 0.093029325 | 0.033930974 | 0.05648812 | 520 | 520 |
| TCF25     | 0.093026311 | 0.033936784 | 0.05648847 | 520 | 520 |
| NUP153    | 0.092992068 | 0.034002847 | 0.05657975 | 520 | 520 |
| QRICH1    | 0.092974605 | 0.03403658  | 0.05662186 | 520 | 520 |
| SPG21     | 0.092967683 | 0.034049957 | 0.05663944 | 520 | 520 |
| ZNF99     | 0.092954718 | 0.034075029 | 0.0566718  | 520 | 111 |
| IVD       | 0.092937559 | 0.034108233 | 0.05672234 | 520 | 520 |
| ZNF681    | 0.092922786 | 0.034136844 | 0.05676056 | 520 | 517 |
| ZNF404    | 0.09284478  | 0.03428825  | 0.05700291 | 520 | 520 |
| WDR60     | 0.092828815 | 0.034319309 | 0.05704984 | 520 | 520 |
| MIA       | 0.092825276 | 0.034326198 | 0.05705659 | 520 | 472 |
| ZBTB34    | 0.092816511 | 0.034343262 | 0.05708024 | 520 | 520 |
| PNKD      | 0.092766484 | 0.034440796 | 0.05722817 | 520 | 520 |
| C9orf4    | 0.092765039 | 0.034443617 | 0.05722817 | 520 | 146 |
| SLC38A2   | 0.092746032 | 0.034480738 | 0.05727569 | 520 | 520 |
| JAK3      | 0.092727707 | 0.034516559 | 0.05732575 | 520 | 520 |
| KIAA0776  | 0.092702115 | 0.03456664  | 0.0574042  | 520 | 520 |
| CLDN23    | 0.092682628 | 0.034604814 | 0.05745813 | 520 | 520 |
| SUMO1P1   | 0.09267603  | 0.034617748 | 0.05747487 | 520 | 280 |
| PRSS42    | 0.092626758 | 0.034714463 | 0.05762121 | 520 | 41  |
| SYNJ1     | 0.092560271 | 0.034845333 | 0.05782415 | 520 | 520 |
| ZNF550    | 0.092490129 | 0.034983853 | 0.05804447 | 520 | 520 |
| FLJ32063  | 0.092415506 | 0.035131735 | 0.05827065 | 520 | 165 |
| MAGEA9B   | 0.092412078 | 0.035138541 | 0.05827715 | 520 | 364 |
| ANO2      | 0.092395379 | 0.035171714 | 0.05832257 | 520 | 518 |
| ZHX1      | 0.092375173 | 0.035211887 | 0.05838438 | 520 | 520 |
| C12orf75  | 0.09237072  | 0.035220745 | 0.05838947 | 520 | 520 |
| TAF4B     | 0.09236653  | 0.035229083 | 0.05839849 | 520 | 520 |
| DIRAS2    | 0.092344443 | 0.035273058 | 0.05846015 | 520 | 435 |
| CD300LG   | 0.092343481 | 0.035274975 | 0.05846015 | 520 | 396 |
| LRP2BP    | 0.092314375 | 0.035333001 | 0.0585515  | 520 | 519 |
| SHQ1      | 0.092312243 | 0.035337253 | 0.05855178 | 520 | 520 |
| PHYHIPL   | 0.092311378 | 0.035338979 | 0.05855178 | 520 | 492 |
| LOC390858 | 0.092306718 | 0.035348278 | 0.05855756 | 520 | 29  |
| ZNF738    | 0.092304086 | 0.035353531 | 0.05855899 | 520 | 520 |
| POLR2A    | 0.092303378 | 0.035354945 | 0.05855899 | 520 | 520 |
| IPO4      | 0.092236233 | 0.035489185 | 0.05876689 | 520 | 520 |
| GALK2     | 0.092218053 | 0.035525605 | 0.05882233 | 520 | 520 |
| ITGAL     | 0.092204255 | 0.035553269 | 0.05885847 | 520 | 520 |
| RGS8      | 0.09212505  | 0.03571242  | 0.05911709 | 520 | 88  |
| TPO       | 0.092096518 | 0.0357699   | 0.05919525 | 520 | 468 |
| ZNF629    | 0.092095782 | 0.035771384 | 0.05919525 | 520 | 520 |
| C14orf102 | 0.092087446 | 0.035788192 | 0.05921821 | 520 | 520 |
| SLC7A5    | 0.092079123 | 0.035804981 | 0.05923141 | 520 | 520 |
| ATRNL1    | 0.091860681 | 0.036248027 | 0.05992009 | 520 | 482 |
| ATG9A     | 0.091844981 | 0.036280048 | 0.05996319 | 520 | 520 |

|             |             |             |            |     |     |
|-------------|-------------|-------------|------------|-----|-----|
| TNRC6A      | 0.091787685 | 0.036397113 | 0.06014188 | 520 | 520 |
| CCND3       | 0.091776943 | 0.036419095 | 0.06016834 | 520 | 520 |
| MAN1B1      | 0.091701669 | 0.036573458 | 0.06041347 | 520 | 520 |
| CPAMD8      | 0.091687008 | 0.036603588 | 0.06045829 | 520 | 520 |
| SLC41A3     | 0.091671829 | 0.036634805 | 0.06050489 | 520 | 520 |
| SLC1A2      | 0.091627893 | 0.036725288 | 0.06064439 | 520 | 512 |
| ANKDD1A     | 0.09160578  | 0.0367709   | 0.0607048  | 520 | 520 |
| ZNF831      | 0.091582314 | 0.036819356 | 0.06077982 | 520 | 514 |
| CASC5       | 0.091504817 | 0.036979769 | 0.06101964 | 520 | 520 |
| SNORD115-26 | 0.091468426 | 0.037055298 | 0.06113427 | 520 | 39  |
| GAGE2E      | 0.091445931 | 0.037102054 | 0.06119639 | 520 | 31  |
| C13orf38    | 0.091382185 | 0.037234818 | 0.06140532 | 520 | 445 |
| HCST        | 0.091379341 | 0.03724075  | 0.06141008 | 520 | 520 |
| TOP3A       | 0.091339458 | 0.037324032 | 0.06153735 | 520 | 520 |
| PNRC1       | 0.091331968 | 0.037339689 | 0.06155813 | 520 | 520 |
| FCRL6       | 0.091309006 | 0.037387726 | 0.06163229 | 520 | 495 |
| ANKRD33     | 0.091247763 | 0.037516103 | 0.06182875 | 520 | 210 |
| AASDHPPT    | 0.091233627 | 0.037545787 | 0.06187261 | 520 | 520 |
| SNX17       | 0.091174436 | 0.037670301 | 0.06207273 | 520 | 520 |
| MTX3        | 0.091151573 | 0.03771849  | 0.06214705 | 520 | 520 |
| CHRM5       | 0.091129442 | 0.037765184 | 0.0622189  | 520 | 466 |
| NFKB1       | 0.091106683 | 0.037813256 | 0.06229301 | 520 | 520 |
| FAM86D      | 0.091084913 | 0.037859288 | 0.06236375 | 520 | 520 |
| PAFAH1B1    | 0.091019927 | 0.037996977 | 0.06258034 | 520 | 520 |
| KDM4D       | 0.09101744  | 0.038002255 | 0.06258392 | 520 | 519 |
| RGS10       | 0.090976564 | 0.03808909  | 0.06271155 | 520 | 520 |
| AGAP2       | 0.090931755 | 0.038184474 | 0.0628532  | 520 | 520 |
| PCDHA8      | 0.090911942 | 0.038226713 | 0.06290804 | 520 | 186 |
| TPTE        | 0.090853108 | 0.038352375 | 0.06310382 | 520 | 371 |
| JAKMIP3     | 0.090801187 | 0.038463562 | 0.06327499 | 520 | 498 |
| FGF6        | 0.090800134 | 0.038465822 | 0.06327499 | 520 | 97  |
| FLJ10213    | 0.090772078 | 0.038526019 | 0.06335851 | 520 | 503 |
| UNC5D       | 0.090713364 | 0.038652257 | 0.06355056 | 520 | 230 |
| 10-Mar      | 0.090651384 | 0.038785896 | 0.06375127 | 520 | 420 |
| C11orf53    | 0.090584819 | 0.038929856 | 0.06396525 | 520 | 477 |
| CHKB        | 0.090556228 | 0.038991829 | 0.06406186 | 520 | 520 |
| PAX8        | 0.090517023 | 0.039076945 | 0.06418079 | 520 | 520 |
| LZTS2       | 0.090378528 | 0.039378883 | 0.06463984 | 520 | 520 |
| TBX1        | 0.090357471 | 0.039424962 | 0.06470494 | 520 | 520 |
| CTLA4       | 0.090327584 | 0.039490443 | 0.06479659 | 520 | 519 |
| GALNT6      | 0.090311426 | 0.039525882 | 0.06484419 | 520 | 520 |
| RB1         | 0.09029375  | 0.039564683 | 0.06490256 | 520 | 520 |
| FTSJD2      | 0.090276949 | 0.039601592 | 0.06495782 | 520 | 520 |
| APOL6       | 0.090265769 | 0.03962617  | 0.06498877 | 520 | 520 |
| HCFC1       | 0.090265433 | 0.039626908 | 0.06498877 | 520 | 520 |
| ZFYVE26     | 0.090113065 | 0.039963152 | 0.06548696 | 520 | 520 |



|            |             |             |            |     |     |
|------------|-------------|-------------|------------|-----|-----|
| EEF1DP3    | 0.090042739 | 0.040119158 | 0.06572404 | 520 | 498 |
| FBXO38     | 0.090024433 | 0.040159852 | 0.06577994 | 520 | 520 |
| RBM44      | 0.090006752 | 0.040199188 | 0.06583095 | 520 | 512 |
| MTCH1      | 0.089989574 | 0.040237438 | 0.06588288 | 520 | 520 |
| WSB2       | 0.089972604 | 0.040275253 | 0.06592339 | 520 | 520 |
| SNHG3-RCC1 | 0.089937336 | 0.040353941 | 0.06604682 | 520 | 518 |
| TERF2IP    | 0.089930131 | 0.040370032 | 0.06606609 | 520 | 520 |
| C16orf86   | 0.089820625 | 0.040615267 | 0.0664167  | 520 | 520 |
| OR1J4      | 0.089820226 | 0.040616163 | 0.0664167  | 520 | 278 |
| RNF213     | 0.089805406 | 0.040649448 | 0.06646574 | 520 | 520 |
| SLCO1B3    | 0.089793005 | 0.040677319 | 0.06650592 | 520 | 473 |
| ACTR3      | 0.089779278 | 0.040708189 | 0.06655099 | 520 | 520 |
| OPRD1      | 0.089758536 | 0.040754871 | 0.06662191 | 520 | 92  |
| NCRNA00113 | 0.089746548 | 0.040781873 | 0.06666064 | 520 | 20  |
| USP35      | 0.089736608 | 0.040804273 | 0.06668644 | 520 | 520 |
| GJD2       | 0.089698958 | 0.040889211 | 0.06681443 | 520 | 74  |
| ZNF193     | 0.089654333 | 0.040990078 | 0.06697382 | 520 | 520 |
| ZNF546     | 0.089541265 | 0.041246593 | 0.06737111 | 520 | 519 |
| HOXA11AS   | 0.089524433 | 0.041284894 | 0.0674282  | 520 | 464 |
| SLC25A40   | 0.089518492 | 0.041298421 | 0.06744483 | 520 | 520 |
| C1orf84    | 0.089496627 | 0.041348235 | 0.06752072 | 520 | 520 |
| PASD1      | 0.089470475 | 0.04140788  | 0.06759075 | 520 | 133 |
| SLC39A12   | 0.089444921 | 0.041466234 | 0.06768052 | 520 | 217 |
| SAMD5      | 0.089438022 | 0.041482    | 0.06770077 | 520 | 520 |
| CTTN       | 0.089430094 | 0.041500123 | 0.06771391 | 520 | 520 |
| IER3       | 0.089417839 | 0.04152815  | 0.06774868 | 520 | 520 |
| GDI1       | 0.089390593 | 0.041590524 | 0.06783945 | 520 | 520 |
| FBXO39     | 0.08933094  | 0.041727357 | 0.06804063 | 520 | 517 |
| PUS7       | 0.089313598 | 0.041767207 | 0.0681001  | 520 | 520 |
| DHX38      | 0.08930748  | 0.041781274 | 0.06811753 | 520 | 520 |
| LMF1       | 0.08925495  | 0.041902215 | 0.06830366 | 520 | 520 |
| NUFIP2     | 0.089224224 | 0.041973093 | 0.06840813 | 520 | 520 |
| KIF17      | 0.08917948  | 0.042076489 | 0.06857111 | 520 | 520 |
| PHEX       | 0.089170353 | 0.042097607 | 0.06859998 | 520 | 516 |
| BRD3       | 0.0891314   | 0.042187832 | 0.0687359  | 520 | 520 |
| ZC3H3      | 0.089127854 | 0.042196055 | 0.06874016 | 520 | 520 |
| ELF2       | 0.089108855 | 0.042240129 | 0.06879887 | 520 | 520 |
| ZNF841     | 0.089051909 | 0.042372464 | 0.06899769 | 520 | 520 |
| C11orf57   | 0.089043885 | 0.042391139 | 0.06902252 | 520 | 520 |
| DAAM1      | 0.088970737 | 0.042561701 | 0.06927786 | 520 | 520 |
| C14orf180  | 0.088916295 | 0.042689022 | 0.06947389 | 520 | 70  |
| C17orf101  | 0.088896095 | 0.042736346 | 0.06953407 | 520 | 520 |
| PTGDS      | 0.088889745 | 0.04275123  | 0.06955267 | 520 | 520 |
| XKR3       | 0.088863218 | 0.04281346  | 0.06962162 | 520 | 157 |
| C15orf26   | 0.088846274 | 0.042853248 | 0.06967929 | 520 | 472 |
| ZFP112     | 0.088818721 | 0.042918017 | 0.06976773 | 520 | 520 |

|              |             |             |            |     |     |
|--------------|-------------|-------------|------------|-----|-----|
| TAS2R38      | 0.088769289 | 0.043034422 | 0.06992891 | 520 | 284 |
| SCN8A        | 0.088699585 | 0.043199018 | 0.07017361 | 520 | 514 |
| LOC100233209 | 0.088643295 | 0.043332326 | 0.07036748 | 520 | 519 |
| C1orf91      | 0.088622097 | 0.043382617 | 0.0704378  | 520 | 520 |
| PSMD2        | 0.088608731 | 0.043414352 | 0.07048366 | 520 | 520 |
| BRI3         | 0.088590151 | 0.043458501 | 0.07054965 | 520 | 520 |
| PLAT         | 0.088557836 | 0.043535375 | 0.07066307 | 520 | 520 |
| NGFR         | 0.088528334 | 0.043605657 | 0.07076006 | 520 | 520 |
| NPC2         | 0.088518692 | 0.043628647 | 0.07078764 | 520 | 520 |
| C1orf144     | 0.088508081 | 0.043653959 | 0.07080994 | 520 | 520 |
| C3orf65      | 0.088462454 | 0.043762945 | 0.07098102 | 520 | 345 |
| OSBPL7       | 0.088460261 | 0.043768189 | 0.07098382 | 520 | 520 |
| C1orf109     | 0.088422605 | 0.043858317 | 0.07110155 | 520 | 520 |
| RRN3P1       | 0.088422564 | 0.043858415 | 0.07110155 | 520 | 518 |
| CRYBG3       | 0.088417868 | 0.043869665 | 0.07111407 | 520 | 520 |
| TOMM34       | 0.088403993 | 0.043902921 | 0.07116226 | 520 | 520 |
| SETDB2       | 0.088376583 | 0.043968681 | 0.07125739 | 520 | 520 |
| LOC728723    | 0.088368469 | 0.043988161 | 0.07127751 | 520 | 483 |
| TMEM109      | 0.088352091 | 0.044027509 | 0.07133553 | 520 | 520 |
| KLHL36       | 0.088340111 | 0.044056307 | 0.07137072 | 520 | 520 |
| NAAA         | 0.088281164 | 0.044198245 | 0.07158341 | 520 | 520 |
| LMLN         | 0.088247061 | 0.044280537 | 0.0716879  | 520 | 520 |
| NRSN1        | 0.088197342 | 0.044400741 | 0.07187096 | 520 | 176 |
| IRF2         | 0.088195147 | 0.044406054 | 0.07187379 | 520 | 520 |
| ZNF426       | 0.088186244 | 0.044427609 | 0.07190291 | 520 | 519 |
| LOC284440    | 0.08817027  | 0.044466306 | 0.07195976 | 520 | 520 |
| SAGE1        | 0.088137388 | 0.044546053 | 0.07207724 | 520 | 188 |
| ZNF436       | 0.088109985 | 0.044612605 | 0.07217334 | 520 | 520 |
| STX3         | 0.088096157 | 0.044646219 | 0.07222193 | 520 | 520 |
| ABCA2        | 0.087957917 | 0.044983441 | 0.0727266  | 520 | 520 |
| SPP2         | 0.08789394  | 0.04514023  | 0.07296253 | 520 | 31  |
| IL27RA       | 0.087883694 | 0.045165382 | 0.07299149 | 520 | 520 |
| SENP6        | 0.087863481 | 0.045215036 | 0.07306588 | 520 | 520 |
| CES7         | 0.087853385 | 0.045239857 | 0.07308841 | 520 | 332 |
| ZNF268       | 0.087844116 | 0.045262652 | 0.07311938 | 520 | 520 |
| ADCY5        | 0.087834269 | 0.045286881 | 0.07315266 | 520 | 506 |
| ZNF468       | 0.087832773 | 0.045290561 | 0.07315275 | 520 | 519 |
| TSPAN31      | 0.087815392 | 0.045333356 | 0.073216   | 520 | 520 |
| PHKB         | 0.087794011 | 0.045386046 | 0.07327299 | 520 | 520 |
| RAI1         | 0.087793701 | 0.04538681  | 0.07327299 | 520 | 520 |
| ZNF251       | 0.087786479 | 0.045404618 | 0.07329    | 520 | 520 |
| INHA         | 0.087761752 | 0.045465638 | 0.07337088 | 520 | 500 |
| ASCC1        | 0.087755385 | 0.045481362 | 0.07339038 | 520 | 520 |
| INTS6        | 0.0876289   | 0.045794667 | 0.07385457 | 520 | 520 |
| CLCN7        | 0.087619799 | 0.04581728  | 0.07388513 | 520 | 520 |
| MLN          | 0.08754036  | 0.046015058 | 0.07416848 | 520 | 5   |

|           |             |             |            |     |     |
|-----------|-------------|-------------|------------|-----|-----|
| ALG11     | 0.087528517 | 0.046044603 | 0.07421016 | 520 | 520 |
| BEND3     | 0.087512696 | 0.0460841   | 0.07426195 | 520 | 520 |
| PKP2      | 0.087456165 | 0.046225457 | 0.07446594 | 520 | 520 |
| NONO      | 0.087431886 | 0.046286281 | 0.07454605 | 520 | 520 |
| PCA3      | 0.087421904 | 0.046311306 | 0.07457444 | 520 | 106 |
| C21orf122 | 0.087383176 | 0.04640851  | 0.07471903 | 520 | 520 |
| RELT      | 0.087342744 | 0.046510171 | 0.07487076 | 520 | 520 |
| PSG8      | 0.087341141 | 0.046514204 | 0.07487127 | 520 | 180 |
| SYNRG     | 0.087331222 | 0.046539175 | 0.07489951 | 520 | 520 |
| HLA-C     | 0.087269424 | 0.046695003 | 0.07512057 | 520 | 520 |
| SLC7A3    | 0.087269361 | 0.046695161 | 0.07512057 | 520 | 205 |
| CDH22     | 0.087264706 | 0.046706918 | 0.07513349 | 520 | 444 |
| SOX8      | 0.087258501 | 0.046722591 | 0.07514072 | 520 | 517 |
| CARD11    | 0.087255342 | 0.046730573 | 0.07514756 | 520 | 520 |
| GPR156    | 0.087215078 | 0.0468324   | 0.0752933  | 520 | 502 |
| BCKDK     | 0.087195695 | 0.046881487 | 0.07536621 | 520 | 520 |
| ZNF420    | 0.087184206 | 0.046910602 | 0.075407   | 520 | 518 |
| FDXACB1   | 0.087129993 | 0.047048195 | 0.07559901 | 520 | 520 |
| PLEKHB1   | 0.087102495 | 0.047118114 | 0.07569832 | 520 | 520 |
| N4BP2L1   | 0.087099767 | 0.047125053 | 0.07570344 | 520 | 519 |
| CXCL16    | 0.087073083 | 0.047192994 | 0.07579447 | 520 | 520 |
| ZNF529    | 0.087032427 | 0.047296669 | 0.07594888 | 520 | 520 |
| MAGEB2    | 0.08701317  | 0.047345841 | 0.07601573 | 520 | 279 |
| FAM20B    | 0.086962358 | 0.047475792 | 0.07620617 | 520 | 520 |
| FLJ39739  | 0.086932395 | 0.047552565 | 0.07631725 | 520 | 482 |
| ZNF461    | 0.086894977 | 0.047648581 | 0.07645917 | 520 | 519 |
| DLGAP3    | 0.086867221 | 0.047719911 | 0.07656754 | 520 | 518 |
| HAR1A     | 0.086796238 | 0.047902737 | 0.07683999 | 520 | 513 |
| ARRDC2    | 0.086793605 | 0.047909528 | 0.07683999 | 520 | 520 |
| GP9       | 0.086792736 | 0.047911771 | 0.07683999 | 520 | 109 |
| GPM6A     | 0.086792424 | 0.047912577 | 0.07683999 | 520 | 443 |
| SPDYE3    | 0.086722144 | 0.0480942   | 0.07711287 | 520 | 520 |
| CAPRIN2   | 0.086717608 | 0.048105942 | 0.07712206 | 520 | 520 |
| KIAA1609  | 0.086567189 | 0.048496686 | 0.07772112 | 520 | 520 |
| MR1       | 0.08653453  | 0.048581874 | 0.07785146 | 520 | 520 |
| CSNK2A1   | 0.086506123 | 0.048656073 | 0.07794915 | 520 | 520 |
| TRHR      | 0.08649462  | 0.048686147 | 0.07798756 | 520 | 65  |
| SIX2      | 0.086450948 | 0.048800463 | 0.07814347 | 520 | 520 |
| TMTC3     | 0.086450036 | 0.048802854 | 0.07814347 | 520 | 520 |
| HTT       | 0.086433046 | 0.048847389 | 0.07820857 | 520 | 520 |
| PPARG     | 0.086422019 | 0.048876311 | 0.07824866 | 520 | 519 |
| NFE2L3    | 0.086340986 | 0.049089295 | 0.0785834  | 520 | 520 |
| 3-Sep     | 0.086302268 | 0.049191334 | 0.078728   | 520 | 520 |
| C8orf4    | 0.086239203 | 0.049357917 | 0.07898207 | 520 | 520 |
| ADCY10    | 0.086173585 | 0.049531746 | 0.07923508 | 520 | 405 |
| PDIA3     | 0.0861628   | 0.049560364 | 0.07927457 | 520 | 520 |

|            |             |             |            |     |     |
|------------|-------------|-------------|------------|-----|-----|
| WDR3       | 0.086123464 | 0.049664865 | 0.07942282 | 520 | 520 |
| E2F5       | 0.086104202 | 0.049716103 | 0.07949215 | 520 | 520 |
| GLRA2      | 0.086073948 | 0.049796671 | 0.07960835 | 520 | 81  |
| HSD17B6    | 0.085973029 | 0.050066214 | 0.08002022 | 520 | 520 |
| HS3ST5     | 0.085934573 | 0.050169245 | 0.08017854 | 520 | 326 |
| CYP2B6     | 0.08592655  | 0.050190762 | 0.08020022 | 520 | 162 |
| DSG4       | 0.085916498 | 0.050217733 | 0.08023661 | 520 | 450 |
| TTY16      | 0.085875535 | 0.050327764 | 0.08039365 | 520 | 22  |
| GPD1       | 0.085847881 | 0.05040216  | 0.08050611 | 520 | 517 |
| ZFP91-CNTF | 0.085795845 | 0.050542398 | 0.08071093 | 520 | 309 |
| ZBTB22     | 0.085684535 | 0.050843477 | 0.08116601 | 520 | 520 |
| ABCD2      | 0.085663182 | 0.050901407 | 0.08125206 | 520 | 498 |
| COPB2      | 0.085657175 | 0.050917711 | 0.08127165 | 520 | 520 |
| CCDC90B    | 0.085653125 | 0.050928708 | 0.08127633 | 520 | 520 |
| CABLES1    | 0.085636215 | 0.050974641 | 0.0813432  | 520 | 520 |
| ACADL      | 0.08561417  | 0.051034577 | 0.08142595 | 520 | 426 |
| 5-Sep      | 0.085605678 | 0.05105768  | 0.0814556  | 520 | 520 |
| NEUROG3    | 0.085601872 | 0.051068038 | 0.0814556  | 520 | 75  |
| ARID4A     | 0.085601402 | 0.051069316 | 0.0814556  | 520 | 520 |
| CARD10     | 0.085571853 | 0.051149791 | 0.0815517  | 520 | 520 |
| CASP8AP2   | 0.085566479 | 0.051164439 | 0.08156861 | 520 | 520 |
| APC        | 0.085541512 | 0.051232532 | 0.08166448 | 520 | 520 |
| PEPD       | 0.085530837 | 0.051261671 | 0.08170424 | 520 | 520 |
| IKZF3      | 0.0855215   | 0.051287167 | 0.08173842 | 520 | 502 |
| INSM2      | 0.085504644 | 0.051333223 | 0.08179889 | 520 | 313 |
| ARF1       | 0.085495691 | 0.051357701 | 0.08182496 | 520 | 520 |
| KCNC4      | 0.085492827 | 0.051365534 | 0.08183097 | 520 | 520 |
| C19orf38   | 0.085445956 | 0.05149385  | 0.08202243 | 520 | 520 |
| CEBPB      | 0.085390806 | 0.051645175 | 0.08225048 | 520 | 520 |
| ZMAT4      | 0.085375441 | 0.051687401 | 0.08231123 | 520 | 214 |
| ENPP6      | 0.08531737  | 0.051847247 | 0.08254622 | 520 | 483 |
| SMAD1      | 0.085265757 | 0.051989665 | 0.08275452 | 520 | 520 |
| PTPLA      | 0.08522352  | 0.052106456 | 0.08293272 | 520 | 520 |
| FOXR2      | 0.085215685 | 0.052128144 | 0.08296069 | 520 | 39  |
| ZKSCAN4    | 0.085200122 | 0.052171248 | 0.08301618 | 520 | 520 |
| RHO        | 0.085149177 | 0.052312551 | 0.08320819 | 520 | 172 |
| LOC338588  | 0.085099013 | 0.052452003 | 0.08341027 | 520 | 84  |
| TRPM3      | 0.085087548 | 0.052483917 | 0.08345444 | 520 | 318 |
| PECI       | 0.085067274 | 0.052540393 | 0.08352448 | 520 | 520 |
| IL18BP     | 0.085026944 | 0.052652888 | 0.08369672 | 520 | 520 |
| FAM21C     | 0.084960623 | 0.052838319 | 0.08395177 | 520 | 520 |
| TPD52L2    | 0.084948001 | 0.05287367  | 0.08400131 | 520 | 520 |
| TNFRSF10C  | 0.084882887 | 0.053056357 | 0.08425172 | 520 | 520 |
| NPR3       | 0.084869726 | 0.053093345 | 0.08429718 | 520 | 516 |
| ZNF777     | 0.084840656 | 0.053175123 | 0.08441373 | 520 | 520 |
| ARMS2      | 0.084837853 | 0.053183014 | 0.08441961 | 520 | 214 |

|           |             |             |            |     |     |
|-----------|-------------|-------------|------------|-----|-----|
| NCAPD2    | 0.084724121 | 0.053504002 | 0.08488903 | 520 | 520 |
| MOGAT2    | 0.084720605 | 0.053513952 | 0.08489228 | 520 | 296 |
| TGIF2LY   | 0.084720422 | 0.053514468 | 0.08489228 | 520 | 40  |
| LRP10     | 0.084702477 | 0.05356527  | 0.08495282 | 520 | 520 |
| CAB39     | 0.084693916 | 0.053589522 | 0.08498311 | 520 | 520 |
| NMBR      | 0.084690805 | 0.053598334 | 0.08498311 | 520 | 175 |
| KIAA0141  | 0.084690791 | 0.053598376 | 0.08498311 | 520 | 520 |
| LOC221710 | 0.084685548 | 0.053613234 | 0.08499546 | 520 | 520 |
| RBM1J     | 0.084672627 | 0.053649865 | 0.08502813 | 520 | 15  |
| PCDH11X   | 0.084670464 | 0.053656    | 0.08502813 | 520 | 274 |
| BNIP2     | 0.084669355 | 0.053659143 | 0.08502813 | 520 | 520 |
| ANKRD13B  | 0.084630121 | 0.053770516 | 0.08517784 | 520 | 520 |
| NR1D2     | 0.084627406 | 0.053778232 | 0.08518337 | 520 | 520 |
| MCF2L2    | 0.084600387 | 0.053855051 | 0.08527825 | 520 | 520 |
| MGST3     | 0.08446342  | 0.054245875 | 0.08582971 | 520 | 520 |
| HBP1      | 0.084436921 | 0.054321761 | 0.08593981 | 520 | 520 |
| C5orf52   | 0.084436144 | 0.054323985 | 0.08593981 | 520 | 27  |
| NPY5R     | 0.084428096 | 0.054347052 | 0.08596956 | 520 | 167 |
| SEL1L3    | 0.084374102 | 0.054502007 | 0.08618763 | 520 | 520 |
| PGAM4     | 0.08431631  | 0.054668269 | 0.08643699 | 520 | 520 |
| PAPOLA    | 0.084298314 | 0.054720126 | 0.08650542 | 520 | 520 |
| C15orf28  | 0.084256353 | 0.054841205 | 0.08667644 | 520 | 411 |
| ZNF317    | 0.084235321 | 0.054901975 | 0.08675209 | 520 | 520 |
| DDX50     | 0.08420966  | 0.054976199 | 0.08684896 | 520 | 520 |
| GBP3      | 0.084200023 | 0.055004093 | 0.08688622 | 520 | 520 |
| TNFSF10   | 0.084197855 | 0.055010371 | 0.08688933 | 520 | 520 |
| TARS      | 0.084140739 | 0.055175956 | 0.08712357 | 520 | 520 |
| RIMS2     | 0.084116775 | 0.055245555 | 0.08722664 | 520 | 514 |
| NEFM      | 0.084073791 | 0.055370578 | 0.08741719 | 520 | 497 |
| CPNE1     | 0.084065917 | 0.055393502 | 0.08744653 | 520 | 520 |
| ITGB4     | 0.084046855 | 0.055449041 | 0.08752051 | 520 | 520 |
| IFNA16    | 0.084042065 | 0.055463003 | 0.08753569 | 520 | 3   |
| MYCBP2    | 0.084013264 | 0.055547019 | 0.08765367 | 520 | 520 |
| WDR11     | 0.08401197  | 0.055550798 | 0.08765367 | 520 | 520 |
| ACPL2     | 0.084006063 | 0.055568042 | 0.08767402 | 520 | 520 |
| SLC22A3   | 0.083971854 | 0.055668004 | 0.08780763 | 520 | 520 |
| C8orf58   | 0.083971123 | 0.055670142 | 0.08780763 | 520 | 520 |
| CFHR1     | 0.083968465 | 0.055677917 | 0.08781302 | 520 | 272 |
| STXBP6    | 0.083933929 | 0.055778997 | 0.08795868 | 520 | 510 |
| SYT4      | 0.083907361 | 0.055856864 | 0.08807459 | 520 | 209 |
| C9orf91   | 0.083881022 | 0.055934148 | 0.08817576 | 520 | 520 |
| LRBA      | 0.083866303 | 0.055977375 | 0.08822321 | 520 | 520 |
| MIXL1     | 0.083858959 | 0.055998953 | 0.08825032 | 520 | 337 |
| ARHGDI1A  | 0.083853688 | 0.056014443 | 0.08826784 | 520 | 520 |
| NRXN1     | 0.083838373 | 0.056059476 | 0.0883319  | 520 | 427 |
| ARL1      | 0.083818709 | 0.056117338 | 0.08839544 | 520 | 520 |

|           |             |             |            |     |     |
|-----------|-------------|-------------|------------|-----|-----|
| ADCYAP1   | 0.083795758 | 0.056184937 | 0.08848809 | 520 | 496 |
| THNSL2    | 0.083741764 | 0.056344233 | 0.08872512 | 520 | 518 |
| ANKRD6    | 0.083691878 | 0.056491741 | 0.08895045 | 520 | 519 |
| C10orf131 | 0.083687384 | 0.056505047 | 0.08896446 | 520 | 346 |
| UCP3      | 0.083613402 | 0.056724439 | 0.0893029  | 520 | 519 |
| FUNDC2P2  | 0.083603817 | 0.056752915 | 0.08934076 | 520 | 520 |
| CCR9      | 0.083553633 | 0.0569022   | 0.08956877 | 520 | 290 |
| PEG3AS    | 0.083513666 | 0.057021325 | 0.08974451 | 520 | 154 |
| DARS      | 0.083513189 | 0.057022747 | 0.08974451 | 520 | 520 |
| KCTD21    | 0.083470294 | 0.057150832 | 0.08993206 | 520 | 520 |
| TAF1A     | 0.083464579 | 0.057167915 | 0.08995192 | 520 | 520 |
| CPSF2     | 0.083380549 | 0.057419579 | 0.09032676 | 520 | 520 |
| C13orf39  | 0.083352874 | 0.057502666 | 0.09045041 | 520 | 59  |
| DUSP16    | 0.083344266 | 0.057528529 | 0.09047697 | 520 | 520 |
| NCOA1     | 0.083318328 | 0.057606522 | 0.09059257 | 520 | 520 |
| GNE       | 0.08328985  | 0.057692252 | 0.09072031 | 520 | 520 |
| PINK1     | 0.083281537 | 0.057717296 | 0.09075262 | 520 | 520 |
| ZBTB39    | 0.083244358 | 0.057829417 | 0.09091473 | 520 | 520 |
| SPAG8     | 0.083194103 | 0.05798126  | 0.09113213 | 520 | 509 |
| NEU1      | 0.083152039 | 0.058108609 | 0.09129671 | 520 | 520 |
| PXT1      | 0.083131156 | 0.058171916 | 0.09138905 | 520 | 361 |
| FIBP      | 0.083118094 | 0.058211546 | 0.09144419 | 520 | 520 |
| TOP1P1    | 0.083093009 | 0.058287711 | 0.0915567  | 520 | 520 |
| C9        | 0.083046065 | 0.058430469 | 0.0917595  | 520 | 359 |
| TUBGCP4   | 0.083042427 | 0.058441545 | 0.09176975 | 520 | 520 |
| C19orf44  | 0.083026155 | 0.058491106 | 0.09183327 | 520 | 520 |
| PCNXL3    | 0.082999153 | 0.058573421 | 0.09195535 | 520 | 520 |
| TBRG1     | 0.082973276 | 0.058652396 | 0.09206499 | 520 | 520 |
| ABCC6P2   | 0.082911707 | 0.058840661 | 0.09234613 | 520 | 434 |
| NR1D1     | 0.082898798 | 0.058880196 | 0.0923938  | 520 | 520 |
| ZNF252    | 0.082889174 | 0.058909685 | 0.09242568 | 520 | 520 |
| TUSC3     | 0.082842971 | 0.059051428 | 0.09262645 | 520 | 520 |
| PLEKHB2   | 0.082749452 | 0.059339193 | 0.09302717 | 520 | 520 |
| CACNA1D   | 0.082735066 | 0.059383563 | 0.0930895  | 520 | 504 |
| C6orf217  | 0.082644668 | 0.059663    | 0.0934912  | 520 | 336 |
| HNRNPUL1  | 0.08264036  | 0.059676343 | 0.09350484 | 520 | 520 |
| KIF4B     | 0.082363957 | 0.060537665 | 0.09478077 | 520 | 520 |
| OR5P3     | 0.082304964 | 0.060722823 | 0.09504114 | 520 | 69  |
| RCAN3     | 0.082299022 | 0.060741498 | 0.09505248 | 520 | 520 |
| SLCO3A1   | 0.082280608 | 0.060799403 | 0.09513146 | 520 | 520 |
| TXNRD1    | 0.082223272 | 0.060979995 | 0.09537703 | 520 | 520 |
| RRAD      | 0.082126362 | 0.061286243 | 0.09584115 | 520 | 520 |
| SERPIND1  | 0.082119529 | 0.061307885 | 0.09586756 | 520 | 433 |
| IPP       | 0.082090358 | 0.061400344 | 0.09599326 | 520 | 520 |
| CCDC42    | 0.082070921 | 0.061462014 | 0.09607132 | 520 | 361 |
| RAP1GDS1  | 0.082057702 | 0.061503983 | 0.09612947 | 520 | 520 |

|           |             |             |            |     |     |
|-----------|-------------|-------------|------------|-----|-----|
| ZCCHC2    | 0.08204236  | 0.061552727 | 0.0961982  | 520 | 520 |
| TCEAL4    | 0.082014153 | 0.061642422 | 0.09632345 | 520 | 520 |
| MOSC2     | 0.081989368 | 0.061721327 | 0.09642433 | 520 | 519 |
| PPM1A     | 0.081928681 | 0.061914875 | 0.09670422 | 520 | 520 |
| GPC1      | 0.081832968 | 0.062221154 | 0.09716755 | 520 | 520 |
| OR8G5     | 0.081799763 | 0.062327699 | 0.09732639 | 520 | 13  |
| SPATA4    | 0.081752394 | 0.062479955 | 0.09752638 | 520 | 221 |
| C18orf54  | 0.08173981  | 0.062520453 | 0.09757449 | 520 | 520 |
| CRHBP     | 0.081710289 | 0.062615545 | 0.09770777 | 520 | 427 |
| CRAMP1L   | 0.081670804 | 0.062742923 | 0.09788238 | 520 | 520 |
| ZNF132    | 0.081650659 | 0.062807991 | 0.09796259 | 520 | 519 |
| GKN2      | 0.08161253  | 0.0629313   | 0.09813973 | 520 | 114 |
| CHD1      | 0.081602022 | 0.062965316 | 0.09817759 | 520 | 520 |
| DNMT3A    | 0.081553735 | 0.063121834 | 0.09840642 | 520 | 520 |
| GPR111    | 0.081550594 | 0.063132027 | 0.0984147  | 520 | 490 |
| TRIM27    | 0.081510497 | 0.063262258 | 0.09859485 | 520 | 520 |
| DENND4B   | 0.081450003 | 0.063459154 | 0.09889407 | 520 | 520 |
| C4orf37   | 0.081418638 | 0.06356144  | 0.09904582 | 520 | 254 |
| NELL1     | 0.081400332 | 0.063621201 | 0.09911596 | 520 | 388 |
| KIAA1244  | 0.081381694 | 0.063682091 | 0.09919549 | 520 | 519 |
| DCC       | 0.081353426 | 0.063774539 | 0.09933183 | 520 | 356 |
| ZNF775    | 0.081328076 | 0.063857535 | 0.09945341 | 520 | 520 |
| KDM3B     | 0.081309286 | 0.063919113 | 0.09954163 | 520 | 520 |
| CDA       | 0.081222099 | 0.064205476 | 0.09994127 | 520 | 520 |
| GH2       | 0.081218985 | 0.064215721 | 0.0999495  | 520 | 55  |
| C19orf34  | 0.081214422 | 0.064230741 | 0.09996516 | 520 | 188 |
| ATP13A2   | 0.081149989 | 0.064443115 | 0.10028795 | 520 | 520 |
| RPL23AP53 | 0.081138736 | 0.064480266 | 0.10033802 | 520 | 520 |
| GABBR2    | 0.081095756 | 0.064622317 | 0.10053579 | 520 | 455 |
| BRCA2     | 0.081065928 | 0.064721051 | 0.10068163 | 520 | 520 |
| ARHGAP30  | 0.081034612 | 0.064824847 | 0.10081976 | 520 | 520 |
| RASGRP2   | 0.081000036 | 0.064939606 | 0.10099045 | 520 | 520 |
| GCM1      | 0.080960125 | 0.065072279 | 0.10117337 | 520 | 354 |
| URB1      | 0.080796004 | 0.0656202   | 0.10193881 | 520 | 520 |
| VAMP5     | 0.080762903 | 0.065731164 | 0.10209546 | 520 | 520 |
| LEPREL1   | 0.080755231 | 0.065756905 | 0.10212334 | 520 | 520 |
| NDE1      | 0.080754533 | 0.065759249 | 0.10212334 | 520 | 520 |
| GPR137C   | 0.080701961 | 0.065935869 | 0.10238975 | 520 | 519 |
| PLEKHH2   | 0.080669147 | 0.066046304 | 0.10254544 | 520 | 520 |
| TRIM78P   | 0.080609145 | 0.066248641 | 0.10282793 | 520 | 490 |
| TOP2B     | 0.080567828 | 0.066388264 | 0.10301312 | 520 | 520 |
| PLCZ1     | 0.080567791 | 0.06638839  | 0.10301312 | 520 | 185 |
| PNO1      | 0.080529309 | 0.066518648 | 0.10319142 | 520 | 520 |
| SIAH3     | 0.080498534 | 0.066622971 | 0.1033453  | 520 | 280 |
| NEK7      | 0.080451832 | 0.066781538 | 0.10357534 | 520 | 520 |
| VWA1      | 0.080446856 | 0.066798453 | 0.1035936  | 520 | 520 |

|             |             |             |            |     |     |
|-------------|-------------|-------------|------------|-----|-----|
| CRYGC       | 0.080444316 | 0.066807089 | 0.10359903 | 520 | 119 |
| B4GALNT4    | 0.080431257 | 0.066851496 | 0.10365195 | 520 | 519 |
| CLCC1       | 0.080333447 | 0.067184887 | 0.10412883 | 520 | 520 |
| AP4M1       | 0.080331095 | 0.06719292  | 0.10413327 | 520 | 520 |
| TSC22D3     | 0.0803048   | 0.067282789 | 0.10426454 | 520 | 520 |
| ASB12       | 0.080290048 | 0.067333251 | 0.10431868 | 520 | 383 |
| MATR3       | 0.080265922 | 0.067415843 | 0.10443862 | 520 | 520 |
| C10orf27    | 0.080245618 | 0.067485415 | 0.10453837 | 520 | 146 |
| ARF3        | 0.080173091 | 0.067734419 | 0.1048838  | 520 | 520 |
| ODF3        | 0.080140112 | 0.067847892 | 0.10504337 | 520 | 77  |
| FLOT1       | 0.080093556 | 0.068008344 | 0.10527562 | 520 | 520 |
| MEN1        | 0.080084774 | 0.068038648 | 0.10531445 | 520 | 520 |
| ARHGAP5     | 0.080048561 | 0.068163713 | 0.10549993 | 520 | 520 |
| UCP2        | 0.080003622 | 0.068319181 | 0.10572433 | 520 | 520 |
| CNBD1       | 0.079994201 | 0.06835181  | 0.1057667  | 520 | 45  |
| MEOX1       | 0.079975642 | 0.068416123 | 0.1058581  | 520 | 520 |
| IFIT3       | 0.079961064 | 0.068466679 | 0.10592006 | 520 | 520 |
| TSNAX-DISC1 | 0.079954966 | 0.068487834 | 0.10594466 | 520 | 186 |
| BRAF        | 0.079943101 | 0.068529012 | 0.10600023 | 520 | 520 |
| GATAD1      | 0.079881104 | 0.068744509 | 0.10627649 | 520 | 520 |
| CNGA4       | 0.079869207 | 0.068785924 | 0.10633236 | 520 | 421 |
| LOC728323   | 0.079850899 | 0.068849698 | 0.10642279 | 520 | 518 |
| IQCK        | 0.079822861 | 0.068947461 | 0.10655757 | 520 | 520 |
| CEP120      | 0.079750121 | 0.069201619 | 0.10688483 | 520 | 520 |
| CLVS2       | 0.079736835 | 0.069248125 | 0.10694847 | 520 | 79  |
| CHML        | 0.079728175 | 0.069278451 | 0.10698711 | 520 | 520 |
| PRHOXNB     | 0.07972122  | 0.069302813 | 0.10701259 | 520 | 3   |
| CXorf51     | 0.079720435 | 0.069305566 | 0.10701259 | 520 | 38  |
| TTY15       | 0.079615452 | 0.069674187 | 0.10755706 | 520 | 408 |
| GATAD2A     | 0.079579664 | 0.069800214 | 0.10772687 | 520 | 520 |
| B4GALT7     | 0.079561962 | 0.069862621 | 0.10780668 | 520 | 520 |
| ATP2C1      | 0.079535044 | 0.069957605 | 0.10794499 | 520 | 520 |
| ZNF302      | 0.079440966 | 0.070290401 | 0.10840543 | 520 | 520 |
| WBP11       | 0.07939597  | 0.070450029 | 0.10862999 | 520 | 520 |
| HBA1        | 0.079387429 | 0.070480365 | 0.10866846 | 520 | 505 |
| C22orf30    | 0.07931471  | 0.070739061 | 0.10898399 | 520 | 520 |
| ZNF778      | 0.079278777 | 0.07086718  | 0.1091562  | 520 | 520 |
| PHF16       | 0.079277287 | 0.070872497 | 0.1091562  | 520 | 520 |
| STK36       | 0.079273579 | 0.070885728 | 0.10916824 | 520 | 520 |
| CCDC68      | 0.079264283 | 0.070918912 | 0.10919433 | 520 | 516 |
| PLD5        | 0.079193683 | 0.071171335 | 0.10954611 | 520 | 309 |
| ARHGAP12    | 0.07918668  | 0.071196415 | 0.10956853 | 520 | 520 |
| PPP2R5D     | 0.079166959 | 0.071267078 | 0.10966341 | 520 | 520 |
| C20orf29    | 0.079151487 | 0.071322555 | 0.10973203 | 520 | 520 |
| MAGEC1      | 0.079109691 | 0.071472598 | 0.10995449 | 520 | 201 |
| NDUFS1      | 0.07908994  | 0.071543593 | 0.11004686 | 520 | 520 |



|              |             |             |            |     |     |
|--------------|-------------|-------------|------------|-----|-----|
| CNTNAP5      | 0.079082264 | 0.071571201 | 0.11007259 | 520 | 187 |
| AP1G1        | 0.079063854 | 0.071637446 | 0.11014926 | 520 | 520 |
| ESRRB        | 0.079055184 | 0.071668662 | 0.11017206 | 520 | 418 |
| ASMTL        | 0.078975808 | 0.071954967 | 0.11056596 | 520 | 520 |
| C12orf66     | 0.078948299 | 0.072054406 | 0.11069753 | 520 | 520 |
| CCDC86       | 0.078894983 | 0.072247452 | 0.11097719 | 520 | 520 |
| C1QTNF9      | 0.078865549 | 0.07235421  | 0.11113272 | 520 | 291 |
| SLAMF1       | 0.078825497 | 0.072499685 | 0.1113392  | 520 | 520 |
| LOC100170939 | 0.078819472 | 0.072521588 | 0.11136435 | 520 | 517 |
| GRM6         | 0.078743137 | 0.072799576 | 0.11173256 | 520 | 378 |
| PRIC285      | 0.078742978 | 0.072800159 | 0.11173256 | 520 | 520 |
| GPR77        | 0.078733783 | 0.072833703 | 0.11176703 | 520 | 517 |
| HBA2         | 0.078724068 | 0.072869156 | 0.11179591 | 520 | 520 |
| SPATA22      | 0.078633748 | 0.073199455 | 0.11223525 | 520 | 269 |
| LAX1         | 0.078633585 | 0.073200051 | 0.11223525 | 520 | 518 |
| ZNF646       | 0.07862596  | 0.073227992 | 0.11225754 | 520 | 520 |
| FAM8A1       | 0.07862506  | 0.073231288 | 0.11225754 | 520 | 520 |
| RILP         | 0.078601067 | 0.073319268 | 0.11237532 | 520 | 520 |
| BRIP1        | 0.078595014 | 0.073341477 | 0.11239182 | 520 | 520 |
| SRRM2        | 0.07859394  | 0.073345416 | 0.11239182 | 520 | 520 |
| ZNF19        | 0.078528297 | 0.073586629 | 0.11269546 | 520 | 519 |
| PRKCE        | 0.078527483 | 0.073589623 | 0.11269546 | 520 | 520 |
| TMEM30A      | 0.078525797 | 0.073595827 | 0.1126964  | 520 | 520 |
| C20orf177    | 0.078521722 | 0.073610824 | 0.11271081 | 520 | 520 |
| PPP1R3F      | 0.07849981  | 0.073691509 | 0.11280009 | 520 | 520 |
| CCDC48       | 0.078495902 | 0.073705906 | 0.11281356 | 520 | 517 |
| CC2D1B       | 0.078422092 | 0.073978257 | 0.11318746 | 520 | 520 |
| HEATR5B      | 0.078419873 | 0.073986458 | 0.11319142 | 520 | 520 |
| CCL3L1       | 0.078398229 | 0.074066485 | 0.11328807 | 520 | 513 |
| MAP2K1       | 0.078380767 | 0.074131104 | 0.11336971 | 520 | 520 |
| NIPAL1       | 0.078373831 | 0.074156782 | 0.11340038 | 520 | 520 |
| OST4         | 0.078332894 | 0.074308486 | 0.11360651 | 520 | 520 |
| WFIKKN2      | 0.078329565 | 0.074320834 | 0.11361678 | 520 | 373 |
| UHRF2        | 0.078280539 | 0.074502873 | 0.11385577 | 520 | 520 |
| CCDC103      | 0.07827986  | 0.074505398 | 0.11385577 | 520 | 520 |
| TMPRSS6      | 0.078268625 | 0.074547164 | 0.11390362 | 520 | 517 |
| RGS2         | 0.078239003 | 0.074657386 | 0.11406209 | 520 | 520 |
| TAF5L        | 0.07820673  | 0.07477762  | 0.11422848 | 520 | 520 |
| GTF2H2C      | 0.078104759 | 0.075158551 | 0.11475822 | 520 | 520 |
| SPIN3        | 0.078100812 | 0.075173327 | 0.11477209 | 520 | 519 |
| SPINK1       | 0.078072921 | 0.075277811 | 0.11492291 | 520 | 406 |
| UBIAD1       | 0.078066493 | 0.075301907 | 0.11495099 | 520 | 520 |
| GORAB        | 0.077979518 | 0.075628575 | 0.11539724 | 520 | 520 |
| SLC35F4      | 0.077915443 | 0.07586997  | 0.11574806 | 520 | 231 |
| ZNF24        | 0.077889655 | 0.075967298 | 0.11588777 | 520 | 520 |
| NPRL3        | 0.077833167 | 0.076180851 | 0.11617035 | 520 | 520 |

|           |             |             |            |     |     |
|-----------|-------------|-------------|------------|-----|-----|
| DGCR11    | 0.077812621 | 0.076258643 | 0.11627944 | 520 | 520 |
| FAM71F1   | 0.077765585 | 0.076436983 | 0.11652494 | 520 | 364 |
| PRTN3     | 0.077759896 | 0.076458577 | 0.11654904 | 520 | 110 |
| TDRD3     | 0.077724611 | 0.076592617 | 0.11674454 | 520 | 520 |
| CAPN2     | 0.07772089  | 0.076606761 | 0.11675727 | 520 | 520 |
| PIGG      | 0.077680903 | 0.076758915 | 0.11696265 | 520 | 520 |
| ZNF790    | 0.077599081 | 0.07707102  | 0.11739387 | 520 | 519 |
| PGF       | 0.077592984 | 0.077094319 | 0.11742049 | 520 | 520 |
| MAPK9     | 0.07758411  | 0.077128236 | 0.11746327 | 520 | 520 |
| MYST3     | 0.077419143 | 0.077761009 | 0.11835545 | 520 | 520 |
| USP45     | 0.077357685 | 0.077997821 | 0.11868005 | 520 | 520 |
| KDM5C     | 0.077321131 | 0.07813895  | 0.11886788 | 520 | 520 |
| C2CD4B    | 0.077300409 | 0.078219046 | 0.11897147 | 520 | 518 |
| INTS1     | 0.077298936 | 0.078224743 | 0.11897147 | 520 | 520 |
| BCLAF1    | 0.077293716 | 0.078244933 | 0.1189932  | 520 | 520 |
| GRIN3A    | 0.077268843 | 0.078341187 | 0.1191306  | 520 | 518 |
| MAP7D1    | 0.077265993 | 0.078352221 | 0.11913544 | 520 | 520 |
| ATP2A3    | 0.077264968 | 0.07835619  | 0.11913544 | 520 | 520 |
| MEFV      | 0.077183171 | 0.078673461 | 0.11959979 | 520 | 519 |
| DHRS7     | 0.077180682 | 0.078683128 | 0.11960547 | 520 | 520 |
| TXNRD3IT1 | 0.077159217 | 0.078766568 | 0.11970524 | 520 | 520 |
| HNRNPUL2  | 0.077146656 | 0.078815427 | 0.11975241 | 520 | 520 |
| FOLR1     | 0.077083627 | 0.079060968 | 0.12008929 | 520 | 483 |
| ALLC      | 0.077059168 | 0.079156423 | 0.12021617 | 520 | 161 |
| MNT       | 0.07704689  | 0.079204373 | 0.12027088 | 520 | 520 |
| INPP5D    | 0.077025018 | 0.079289848 | 0.12037362 | 520 | 520 |
| MYO7A     | 0.077013676 | 0.079334205 | 0.12043175 | 520 | 520 |
| GRID2     | 0.076975372 | 0.079484148 | 0.12065028 | 520 | 105 |
| CCDC13    | 0.076944479 | 0.079605246 | 0.12080682 | 520 | 516 |
| SMAP2     | 0.076942336 | 0.07961365  | 0.12081048 | 520 | 520 |
| LTBR      | 0.076874778 | 0.079879018 | 0.1211858  | 520 | 520 |
| SLC25A13  | 0.076793845 | 0.080197868 | 0.12164208 | 520 | 520 |
| KIAA1012  | 0.076791562 | 0.080206878 | 0.1216466  | 520 | 520 |
| TMEM173   | 0.076702701 | 0.080558177 | 0.12210592 | 520 | 520 |
| GAGE13    | 0.076696177 | 0.080584018 | 0.12213444 | 520 | 53  |
| MTMR10    | 0.076691835 | 0.08060122  | 0.12213444 | 520 | 520 |
| TIGIT     | 0.076663627 | 0.080821616 | 0.1224408  | 520 | 519 |
| VWCE      | 0.076608241 | 0.08093298  | 0.12257268 | 520 | 519 |
| ULK1      | 0.076606143 | 0.080941321 | 0.1225761  | 520 | 520 |
| TMEM72    | 0.076551455 | 0.081158974 | 0.12288725 | 520 | 44  |
| TNFAIP1   | 0.076527901 | 0.081252864 | 0.12299247 | 520 | 520 |
| KIAA1191  | 0.076518611 | 0.081289921 | 0.12303933 | 520 | 520 |
| SACM1L    | 0.076469815 | 0.081484779 | 0.1233065  | 520 | 520 |
| MCOLN1    | 0.076459071 | 0.081527733 | 0.12335282 | 520 | 520 |
| PRDM9     | 0.076458525 | 0.081529918 | 0.12335282 | 520 | 125 |
| CCL3L3    | 0.076457568 | 0.081533743 | 0.12335282 | 520 | 354 |

|              |             |             |            |     |     |
|--------------|-------------|-------------|------------|-----|-----|
| TUBB6        | 0.076436342 | 0.081618666 | 0.12347204 | 520 | 520 |
| 15-Sep       | 0.076414439 | 0.08170637  | 0.12358617 | 520 | 520 |
| PRUNE        | 0.076363715 | 0.081909777 | 0.12385667 | 520 | 520 |
| LTA          | 0.076358556 | 0.081930488 | 0.1238787  | 520 | 516 |
| RAD21L1      | 0.076349183 | 0.081968126 | 0.12392632 | 520 | 123 |
| PMCH         | 0.076318868 | 0.082089953 | 0.1241012  | 520 | 469 |
| C7orf28B     | 0.076285566 | 0.082223959 | 0.12427584 | 520 | 520 |
| HBG1         | 0.07628334  | 0.082232922 | 0.12428007 | 520 | 278 |
| MECP2        | 0.07620324  | 0.082555985 | 0.12472158 | 520 | 520 |
| CES4         | 0.076200652 | 0.08256644  | 0.12472803 | 520 | 393 |
| PGK1         | 0.076183374 | 0.082636269 | 0.12481481 | 520 | 520 |
| C10orf88     | 0.076140628 | 0.08280923  | 0.12504522 | 520 | 520 |
| BHLHB9       | 0.076018703 | 0.083304172 | 0.12573885 | 520 | 520 |
| MAEL         | 0.07597496  | 0.083482328 | 0.12597947 | 520 | 278 |
| SEC16A       | 0.075949337 | 0.083586823 | 0.12611828 | 520 | 520 |
| BFSP1        | 0.075921751 | 0.083699448 | 0.12623154 | 520 | 520 |
| C6orf211     | 0.075833188 | 0.084061841 | 0.12674016 | 520 | 520 |
| B4GALT2      | 0.075799448 | 0.084200233 | 0.12692035 | 520 | 520 |
| GRIN2D       | 0.075762153 | 0.084353422 | 0.12713225 | 520 | 520 |
| LOC100101266 | 0.075725815 | 0.0845029   | 0.12730045 | 520 | 430 |
| RAB1A        | 0.075720471 | 0.084524898 | 0.12732407 | 520 | 520 |
| C5orf22      | 0.075708636 | 0.084573636 | 0.12736895 | 520 | 520 |
| XPO5         | 0.07566028  | 0.084773013 | 0.12764061 | 520 | 520 |
| DENND1B      | 0.07563495  | 0.084877603 | 0.127779   | 520 | 520 |
| NXF5         | 0.075586488 | 0.085077999 | 0.12804245 | 520 | 91  |
| TMEM25       | 0.075556146 | 0.085203655 | 0.12819329 | 520 | 520 |
| C15orf27     | 0.07553875  | 0.085275768 | 0.12829222 | 520 | 519 |
| POGK         | 0.075519915 | 0.085353903 | 0.12839061 | 520 | 520 |
| CCNB3        | 0.075457168 | 0.085614612 | 0.12875396 | 520 | 507 |
| PTMS         | 0.075454988 | 0.085623679 | 0.12875643 | 520 | 520 |
| TAS2R10      | 0.075453703 | 0.085629027 | 0.12875643 | 520 | 249 |
| TMC2         | 0.075438503 | 0.085692284 | 0.12882273 | 520 | 264 |
| BCL2L11      | 0.075429668 | 0.085729071 | 0.12885881 | 520 | 520 |
| CLEC4M       | 0.075391155 | 0.085889581 | 0.12907121 | 520 | 338 |
| SEC16B       | 0.075338738 | 0.086108423 | 0.12938079 | 520 | 520 |
| KCNK15       | 0.075334788 | 0.086124933 | 0.12939596 | 520 | 491 |
| TFEB         | 0.075323184 | 0.08617345  | 0.1294592  | 520 | 520 |
| NOTCH1       | 0.075225024 | 0.086584733 | 0.13003833 | 520 | 520 |
| ZSCAN29      | 0.075194669 | 0.086712236 | 0.13020073 | 520 | 520 |
| RBMY1A3P     | 0.075187924 | 0.086740589 | 0.1302336  | 520 | 15  |
| PABPC1       | 0.075085451 | 0.087172248 | 0.13082325 | 520 | 520 |
| FKTN         | 0.075034745 | 0.087386486 | 0.13113501 | 520 | 520 |
| MAFB         | 0.074995046 | 0.08755451  | 0.13135782 | 520 | 520 |
| DYRK4        | 0.074893144 | 0.087986995 | 0.13194777 | 520 | 520 |
| ZNF860       | 0.074854249 | 0.088152527 | 0.13218618 | 520 | 517 |
| LPPR1        | 0.074848146 | 0.088178519 | 0.13221532 | 520 | 369 |

|           |             |             |            |     |     |
|-----------|-------------|-------------|------------|-----|-----|
| CHRM3     | 0.074832859 | 0.088243662 | 0.13228349 | 520 | 479 |
| OR2D3     | 0.074792404 | 0.088416239 | 0.13252249 | 520 | 20  |
| ASB16     | 0.074777661 | 0.088479201 | 0.13257744 | 520 | 517 |
| LGSN      | 0.074774668 | 0.088491984 | 0.13258674 | 520 | 292 |
| SLC26A6   | 0.074743081 | 0.088627012 | 0.13275946 | 520 | 520 |
| MYL10     | 0.074727066 | 0.088695538 | 0.13282264 | 520 | 65  |
| IRX2      | 0.074705249 | 0.088788955 | 0.13294279 | 520 | 519 |
| KIAA0556  | 0.074693998 | 0.088837161 | 0.13300509 | 520 | 520 |
| AKIRIN1   | 0.074631286 | 0.089106244 | 0.13339805 | 520 | 520 |
| PSEN1     | 0.074628569 | 0.089117918 | 0.13340562 | 520 | 520 |
| OR9A4     | 0.074590857 | 0.08928006  | 0.1336285  | 520 | 166 |
| CERK      | 0.074577228 | 0.089338718 | 0.13368712 | 520 | 520 |
| RBM46     | 0.074577136 | 0.089339117 | 0.13368712 | 520 | 291 |
| KIAA0892  | 0.074561882 | 0.089404804 | 0.13375389 | 520 | 520 |
| LOC285692 | 0.074560613 | 0.089410271 | 0.13375389 | 520 | 20  |
| OR1G1     | 0.074558063 | 0.089421253 | 0.1337604  | 520 | 97  |
| CRHR1     | 0.074490909 | 0.089710941 | 0.13414397 | 520 | 304 |
| CT45A5    | 0.074485899 | 0.089732585 | 0.13416638 | 520 | 185 |
| HSPC072   | 0.074436876 | 0.089944574 | 0.13445592 | 520 | 341 |
| IARS      | 0.074393104 | 0.090134198 | 0.13472691 | 520 | 520 |
| CD1A      | 0.074385973 | 0.090165121 | 0.13475315 | 520 | 518 |
| LMO1      | 0.074333379 | 0.090393449 | 0.13507437 | 520 | 486 |
| CA9       | 0.07429179  | 0.090574326 | 0.13533462 | 520 | 520 |
| RNF40     | 0.074285733 | 0.090600693 | 0.13536399 | 520 | 520 |
| LOC200030 | 0.074280054 | 0.090625424 | 0.13539091 | 520 | 520 |
| CUL5      | 0.074271415 | 0.090663049 | 0.13543708 | 520 | 520 |
| SRF       | 0.074258969 | 0.090717277 | 0.13550805 | 520 | 520 |
| CD48      | 0.074251974 | 0.09074777  | 0.13554356 | 520 | 520 |
| ZNF845    | 0.074238125 | 0.090808157 | 0.13562371 | 520 | 520 |
| LOC400927 | 0.07419093  | 0.091014194 | 0.13589117 | 520 | 517 |
| UBP1      | 0.074163089 | 0.091135917 | 0.13605276 | 520 | 520 |
| FAM181B   | 0.07413099  | 0.091276417 | 0.13625242 | 520 | 503 |
| HIST2H2BF | 0.074074445 | 0.091524336 | 0.13659216 | 520 | 520 |
| SOSTDC1   | 0.074066925 | 0.09155735  | 0.13663132 | 520 | 493 |
| SNAPC3    | 0.074019112 | 0.091767469 | 0.13692587 | 520 | 520 |
| STAMBP    | 0.074018921 | 0.091768307 | 0.13692587 | 520 | 520 |
| NCF4      | 0.073981483 | 0.091933102 | 0.13715145 | 520 | 520 |
| TRPC4AP   | 0.073958769 | 0.092033199 | 0.13729063 | 520 | 520 |
| ZZZ3      | 0.073871827 | 0.092417151 | 0.1378226  | 520 | 520 |
| ADAMTS20  | 0.073861357 | 0.092463475 | 0.13787695 | 520 | 409 |
| FCER1A    | 0.073858955 | 0.092474105 | 0.13787695 | 520 | 518 |
| CPEB4     | 0.073813346 | 0.092676134 | 0.13815774 | 520 | 520 |
| SNN       | 0.073806624 | 0.092705938 | 0.13818871 | 520 | 520 |
| TYW1B     | 0.073771431 | 0.09286211  | 0.13840429 | 520 | 520 |
| INCENP    | 0.073751141 | 0.092952246 | 0.13851012 | 520 | 520 |
| DDHD2     | 0.073750808 | 0.092953728 | 0.13851012 | 520 | 520 |

|           |             |             |            |     |     |
|-----------|-------------|-------------|------------|-----|-----|
| GFRAL     | 0.073727809 | 0.093055981 | 0.138642   | 520 | 18  |
| HSPA6     | 0.073687032 | 0.093237497 | 0.13889191 | 520 | 520 |
| RRAS2     | 0.073593091 | 0.093656753 | 0.13947524 | 520 | 520 |
| IGSF3     | 0.073548136 | 0.093857915 | 0.13975417 | 520 | 520 |
| ZCCHC4    | 0.073535711 | 0.093913579 | 0.13982673 | 520 | 520 |
| TIGD6     | 0.073476404 | 0.09417962  | 0.14019178 | 520 | 520 |
| PTPRF     | 0.073470674 | 0.094205352 | 0.14021973 | 520 | 520 |
| C8orf33   | 0.073417654 | 0.094443756 | 0.14056421 | 520 | 520 |
| CCDC144NL | 0.073387972 | 0.09457743  | 0.14074463 | 520 | 262 |
| USP44     | 0.073380766 | 0.094609903 | 0.14078032 | 520 | 458 |
| FBP2      | 0.073310586 | 0.094926649 | 0.14122037 | 520 | 348 |
| FKBP1A    | 0.073141944 | 0.095691248 | 0.14229486 | 520 | 520 |
| CD207     | 0.073121055 | 0.095786296 | 0.1424257  | 520 | 516 |
| KLK3      | 0.073078028 | 0.095982315 | 0.14268559 | 520 | 194 |
| WDR31     | 0.072929354 | 0.096662096 | 0.14360086 | 520 | 515 |
| EREG      | 0.072884644 | 0.096867275 | 0.14385268 | 520 | 519 |
| LDHAL6B   | 0.072882835 | 0.096875581 | 0.14385442 | 520 | 461 |
| IL33      | 0.07283529  | 0.097094164 | 0.14416839 | 520 | 519 |
| IL9R      | 0.072818177 | 0.097172938 | 0.14427473 | 520 | 509 |
| 2-Mar     | 0.072787432 | 0.097314585 | 0.1444744  | 520 | 520 |
| KIAA0182  | 0.072736059 | 0.097551635 | 0.14480287 | 520 | 520 |
| GDPD1     | 0.072732527 | 0.097567951 | 0.1448079  | 520 | 517 |
| CP110     | 0.072718545 | 0.097632555 | 0.14488518 | 520 | 520 |
| HIC2      | 0.072697252 | 0.09773101  | 0.14498745 | 520 | 520 |
| USP2      | 0.072643266 | 0.097980979 | 0.14532464 | 520 | 520 |
| PIP5K1B   | 0.07263823  | 0.09800432  | 0.14533788 | 520 | 514 |
| SOX1      | 0.072618715 | 0.098094824 | 0.14545886 | 520 | 334 |
| ZNF816A   | 0.072606692 | 0.098150614 | 0.14550132 | 520 | 520 |
| PEX12     | 0.072590688 | 0.098224916 | 0.14560076 | 520 | 520 |
| ABAT      | 0.072568781 | 0.098326699 | 0.14574093 | 520 | 520 |
| IL1RL1    | 0.07250956  | 0.098602266 | 0.14612789 | 520 | 517 |
| FBXO21    | 0.07250784  | 0.098610277 | 0.14612902 | 520 | 520 |
| MGC15885  | 0.072389624 | 0.099162234 | 0.14688219 | 520 | 144 |
| NUBPL     | 0.072377236 | 0.099220213 | 0.14695728 | 520 | 520 |
| OBP2B     | 0.072321721 | 0.099480385 | 0.14731016 | 520 | 210 |
| IAH1      | 0.072303745 | 0.099564743 | 0.14742425 | 520 | 520 |
| KLC4      | 0.07230088  | 0.099578196 | 0.14743335 | 520 | 520 |
| KAZALD1   | 0.072267365 | 0.099735648 | 0.14762311 | 520 | 519 |
| SKINTL    | 0.072263984 | 0.099751539 | 0.14763579 | 520 | 149 |
| CXCL6     | 0.072223865 | 0.099940301 | 0.14789346 | 520 | 515 |
| TERF1     | 0.072214696 | 0.099983482 | 0.1479465  | 520 | 520 |
| FXR2      | 0.072182006 | 0.100137553 | 0.14816361 | 520 | 520 |
| KDM2A     | 0.072161031 | 0.100236511 | 0.14829914 | 520 | 520 |
| TRUB1     | 0.072152376 | 0.100277368 | 0.14834871 | 520 | 520 |
| OXR1      | 0.072133963 | 0.100364327 | 0.14846166 | 520 | 520 |
| TMLHE     | 0.072133091 | 0.100368448 | 0.14846166 | 520 | 520 |

|              |             |             |            |     |     |
|--------------|-------------|-------------|------------|-----|-----|
| FERD3L       | 0.072062283 | 0.100703433 | 0.14891347 | 520 | 49  |
| KIAA0913     | 0.07204167  | 0.100801116 | 0.1490142  | 520 | 520 |
| NCRNA00175   | 0.072031751 | 0.100848151 | 0.1490728  | 520 | 204 |
| FEM1C        | 0.071987315 | 0.101059064 | 0.14936267 | 520 | 520 |
| ANKRD45      | 0.071984782 | 0.1010711   | 0.14936951 | 520 | 488 |
| SLC6A5       | 0.071891354 | 0.10151574  | 0.14997167 | 520 | 90  |
| XIAP         | 0.071850022 | 0.101712943 | 0.15025101 | 520 | 520 |
| STAT1        | 0.071822606 | 0.101843916 | 0.15040764 | 520 | 520 |
| DFFB         | 0.071745353 | 0.102213693 | 0.15090327 | 520 | 520 |
| SNORA16B     | 0.071709068 | 0.10238774  | 0.15114916 | 520 | 10  |
| DOPEY2       | 0.071705413 | 0.102405288 | 0.151164   | 520 | 520 |
| KIAA1751     | 0.071698996 | 0.102436096 | 0.15119841 | 520 | 461 |
| DUSP19       | 0.07169732  | 0.102444146 | 0.15119922 | 520 | 520 |
| PSG4         | 0.071686784 | 0.102494746 | 0.15125176 | 520 | 460 |
| KRTAP13-1    | 0.071656932 | 0.102638235 | 0.15145242 | 520 | 47  |
| NDUF4F3      | 0.071648786 | 0.102677416 | 0.15148807 | 520 | 520 |
| OR10A3       | 0.071636183 | 0.102738062 | 0.15153319 | 520 | 167 |
| GRAP2        | 0.071590114 | 0.10295998  | 0.1518383  | 520 | 518 |
| CORO1B       | 0.071587268 | 0.102973699 | 0.15184742 | 520 | 520 |
| T            | 0.071564395 | 0.103084038 | 0.1519879  | 520 | 211 |
| RAMP3        | 0.071487216 | 0.103457024 | 0.15249323 | 520 | 520 |
| LOC100133469 | 0.071470128 | 0.103539746 | 0.15259105 | 520 | 99  |
| RBP1         | 0.071468819 | 0.103546087 | 0.15259105 | 520 | 520 |
| WDR48        | 0.071450532 | 0.103634679 | 0.15271044 | 520 | 520 |
| FLT3         | 0.071434238 | 0.10371367  | 0.15279261 | 520 | 511 |
| BTNL8        | 0.071424216 | 0.103762276 | 0.15284261 | 520 | 444 |
| VWA3B        | 0.071389547 | 0.103930561 | 0.15307932 | 520 | 466 |
| TLR9         | 0.071337203 | 0.104185052 | 0.15342054 | 520 | 518 |
| SMARCA2      | 0.071320503 | 0.104266353 | 0.15351783 | 520 | 520 |
| RNF113B      | 0.07130864  | 0.104324133 | 0.15359169 | 520 | 95  |
| TAS2R30      | 0.071274183 | 0.104492108 | 0.15382322 | 520 | 100 |
| C12orf51     | 0.071271095 | 0.104507172 | 0.15382748 | 520 | 520 |
| KRT75        | 0.071268904 | 0.104517861 | 0.15383198 | 520 | 519 |
| TCP10L       | 0.071264603 | 0.104538844 | 0.15385164 | 520 | 504 |
| ZNF696       | 0.071239963 | 0.104659136 | 0.15401743 | 520 | 520 |
| CCR7         | 0.071195546 | 0.104876254 | 0.15430316 | 520 | 520 |
| PHF6         | 0.071186925 | 0.104918435 | 0.15435396 | 520 | 520 |
| LOC654433    | 0.071156146 | 0.105069145 | 0.1545644  | 520 | 520 |
| GFI1         | 0.071142369 | 0.10513666  | 0.15465244 | 520 | 520 |
| OR1J2        | 0.071083021 | 0.105427893 | 0.1550469  | 520 | 335 |
| PDE6D        | 0.070971819 | 0.105975294 | 0.15573834 | 520 | 520 |
| FAM9A        | 0.070928097 | 0.106191133 | 0.15599869 | 520 | 29  |
| FSTL5        | 0.070920871 | 0.106226837 | 0.15603977 | 520 | 301 |
| WDR36        | 0.070911596 | 0.106272686 | 0.15609007 | 520 | 520 |
| GZMK         | 0.070910812 | 0.106276558 | 0.15609007 | 520 | 517 |
| LOC100133669 | 0.070854501 | 0.106555235 | 0.15646517 | 520 | 498 |

|              |             |             |            |     |     |
|--------------|-------------|-------------|------------|-----|-----|
| C19orf63     | 0.070847447 | 0.106590187 | 0.1564937  | 520 | 520 |
| USP9Y        | 0.070833882 | 0.106657422 | 0.15656962 | 520 | 442 |
| CHUK         | 0.070771403 | 0.106967533 | 0.15697914 | 520 | 520 |
| CNPY3        | 0.070708012 | 0.107282903 | 0.15737323 | 520 | 520 |
| C9orf150     | 0.070696535 | 0.107340078 | 0.15744565 | 520 | 520 |
| CCDC121      | 0.070670044 | 0.107472142 | 0.15760497 | 520 | 518 |
| C11orf61     | 0.070614966 | 0.10774713  | 0.15796227 | 520 | 520 |
| RAVER1       | 0.070572773 | 0.107958161 | 0.15821414 | 520 | 520 |
| KLHL23       | 0.070504697 | 0.108299336 | 0.15865648 | 520 | 509 |
| FBXO16       | 0.070468689 | 0.108480145 | 0.15889827 | 520 | 483 |
| RHAG         | 0.070454978 | 0.108549053 | 0.15897611 | 520 | 70  |
| LRRCC1       | 0.070433053 | 0.108659313 | 0.15912604 | 520 | 520 |
| ZNF594       | 0.070418302 | 0.10873355  | 0.15921163 | 520 | 520 |
| ZNF498       | 0.070415412 | 0.108748099 | 0.15922137 | 520 | 520 |
| AVIL         | 0.070390169 | 0.108875239 | 0.15938437 | 520 | 519 |
| ADRA1A       | 0.070375956 | 0.108946877 | 0.15945451 | 520 | 254 |
| ST6GALNAC4   | 0.070289009 | 0.109385921 | 0.16001579 | 520 | 520 |
| C9orf93      | 0.070274459 | 0.109459531 | 0.16008863 | 520 | 520 |
| IL22RA2      | 0.070251851 | 0.109573978 | 0.16020953 | 520 | 512 |
| MIER3        | 0.070249215 | 0.10958733  | 0.16021744 | 520 | 520 |
| RPL10L       | 0.070243616 | 0.109615692 | 0.1602322  | 520 | 112 |
| LOC285033    | 0.070223029 | 0.109720026 | 0.16035331 | 520 | 520 |
| C21orf29     | 0.070150512 | 0.110088155 | 0.160868   | 520 | 422 |
| POLR2B       | 0.070143483 | 0.11012389  | 0.16090134 | 520 | 520 |
| BCL2L13      | 0.07014121  | 0.110135446 | 0.16090213 | 520 | 520 |
| LOC100133050 | 0.070128849 | 0.110198318 | 0.16098231 | 520 | 50  |
| EPM2AIP1     | 0.070097849 | 0.110356109 | 0.16117779 | 520 | 520 |
| PSMF1        | 0.06991182  | 0.111306747 | 0.16246031 | 520 | 520 |
| ATXN2L       | 0.069907922 | 0.111326734 | 0.16247773 | 520 | 520 |
| DFNB31       | 0.069882629 | 0.111456499 | 0.16264357 | 520 | 520 |
| FAM26D       | 0.069860404 | 0.111570627 | 0.16279833 | 520 | 114 |
| LOC220594    | 0.069826259 | 0.111746134 | 0.16301903 | 520 | 517 |
| SLC31A1      | 0.069778654 | 0.111991197 | 0.16334108 | 520 | 520 |
| KIAA1328     | 0.06976339  | 0.112069861 | 0.16343217 | 520 | 520 |
| HCG9         | 0.069748688 | 0.112145672 | 0.1635309  | 520 | 80  |
| TPTE2P1      | 0.069746027 | 0.112159399 | 0.16353909 | 520 | 444 |
| C22orf28     | 0.069686578 | 0.112466385 | 0.16396299 | 520 | 520 |
| PLEKHA8      | 0.069582623 | 0.11300478  | 0.16471219 | 520 | 520 |
| C11orf66     | 0.069502957 | 0.113418745 | 0.16523196 | 520 | 518 |
| IL8          | 0.069487753 | 0.113497884 | 0.16533531 | 520 | 520 |
| SOS2         | 0.06944017  | 0.113745843 | 0.16565518 | 520 | 520 |
| CHORDC1      | 0.069435123 | 0.11377217  | 0.16567502 | 520 | 520 |
| C19orf69     | 0.069426479 | 0.113817268 | 0.16571676 | 520 | 155 |
| OR7G1        | 0.069386694 | 0.114025019 | 0.16599527 | 520 | 15  |
| ADAM28       | 0.069361822 | 0.114155048 | 0.16616057 | 520 | 519 |
| LOC144486    | 0.069332491 | 0.11430854  | 0.16637198 | 520 | 514 |

|            |             |             |            |     |     |
|------------|-------------|-------------|------------|-----|-----|
| MAGEB6     | 0.069310726 | 0.114422542 | 0.16651387 | 520 | 210 |
| CPT1C      | 0.069295508 | 0.114502303 | 0.16660589 | 520 | 520 |
| LCK        | 0.069270744 | 0.114632195 | 0.16677591 | 520 | 520 |
| METTL14    | 0.06926976  | 0.114637356 | 0.16677591 | 520 | 520 |
| ADA        | 0.069262466 | 0.114675638 | 0.16679792 | 520 | 520 |
| ZNF467     | 0.069229224 | 0.114850227 | 0.16700368 | 520 | 520 |
| FRG1B      | 0.069166681 | 0.115179275 | 0.16740971 | 520 | 520 |
| DENND4C    | 0.069156709 | 0.115231811 | 0.167474   | 520 | 520 |
| GNAL       | 0.069145073 | 0.115293135 | 0.16755105 | 520 | 520 |
| BTA1F1     | 0.069138834 | 0.115326024 | 0.16756261 | 520 | 520 |
| SENP1      | 0.069103896 | 0.115510342 | 0.16780623 | 520 | 520 |
| C6orf218   | 0.069101844 | 0.115521178 | 0.16780989 | 520 | 457 |
| RGS7       | 0.069076819 | 0.115653351 | 0.16796558 | 520 | 297 |
| PSG7       | 0.069060424 | 0.115740005 | 0.16807857 | 520 | 188 |
| DVL3       | 0.069036589 | 0.11586608  | 0.16823818 | 520 | 520 |
| GALNT13    | 0.069020555 | 0.115950951 | 0.16834929 | 520 | 498 |
| C10orf96   | 0.068972412 | 0.116206074 | 0.16869541 | 520 | 21  |
| MUS81      | 0.068964646 | 0.116247268 | 0.16874306 | 520 | 520 |
| TBX22      | 0.068945457 | 0.116349105 | 0.16887873 | 520 | 42  |
| TMEM209    | 0.068932019 | 0.116420464 | 0.16897015 | 520 | 520 |
| PLA2G1B    | 0.068922019 | 0.116473588 | 0.16903508 | 520 | 196 |
| C11orf64   | 0.068884684 | 0.116672097 | 0.16931099 | 520 | 3   |
| SLC10A7    | 0.068857599 | 0.11681627  | 0.16950801 | 520 | 520 |
| C17orf82   | 0.068853374 | 0.116838774 | 0.16952846 | 520 | 507 |
| CC2D2B     | 0.068845941 | 0.116878374 | 0.16956152 | 520 | 488 |
| ARHGAP11B  | 0.068826922 | 0.116979736 | 0.16969636 | 520 | 517 |
| NCRNA00081 | 0.068779973 | 0.117230253 | 0.16999862 | 520 | 520 |
| FKSG29     | 0.068761691 | 0.117327917 | 0.17011578 | 520 | 174 |
| ZNF761     | 0.068725693 | 0.11752041  | 0.17037037 | 520 | 520 |
| ALS2CR12   | 0.068613675 | 0.118120986 | 0.1711795  | 520 | 484 |
| PECR       | 0.068603292 | 0.118176776 | 0.17124804 | 520 | 520 |
| TBX4       | 0.068577239 | 0.118316852 | 0.1714387  | 520 | 483 |
| FXR1       | 0.068531619 | 0.118562444 | 0.17173286 | 520 | 520 |
| ALG8       | 0.068502334 | 0.118720311 | 0.17192447 | 520 | 520 |
| JARID2     | 0.068468093 | 0.118905102 | 0.17215498 | 520 | 520 |
| FOXB1      | 0.068430189 | 0.119109921 | 0.17243915 | 520 | 258 |
| VPS54      | 0.068400399 | 0.119271086 | 0.17264768 | 520 | 520 |
| SHROOM1    | 0.068356516 | 0.119508811 | 0.17296696 | 520 | 520 |
| CPXCR1     | 0.068347579 | 0.119557265 | 0.17302467 | 520 | 173 |
| C5orf23    | 0.068326327 | 0.119672561 | 0.17316667 | 520 | 520 |
| KCNH1      | 0.068280351 | 0.119922289 | 0.17347823 | 520 | 510 |
| PGA3       | 0.068256798 | 0.120050377 | 0.17365106 | 520 | 462 |
| SSR1       | 0.068250385 | 0.120085268 | 0.17367661 | 520 | 520 |
| IL31       | 0.068228624 | 0.120203737 | 0.17383548 | 520 | 81  |
| GRN        | 0.068200124 | 0.120359026 | 0.17403509 | 520 | 520 |
| NLRP11     | 0.06819152  | 0.120405935 | 0.17409044 | 520 | 277 |



|           |             |             |            |     |     |
|-----------|-------------|-------------|------------|-----|-----|
| XAGE1D    | 0.068157348 | 0.120592393 | 0.17434753 | 520 | 153 |
| CTBP1     | 0.068136711 | 0.120705109 | 0.17446046 | 520 | 520 |
| HOXB9     | 0.068132476 | 0.12072825  | 0.17446889 | 520 | 490 |
| MON2      | 0.068100651 | 0.120902253 | 0.17470783 | 520 | 520 |
| DULLARD   | 0.068087795 | 0.1209726   | 0.17477191 | 520 | 520 |
| GPR19     | 0.068075092 | 0.121042146 | 0.17485985 | 520 | 515 |
| LRRC34    | 0.068073152 | 0.121052769 | 0.17486267 | 520 | 518 |
| RILPL2    | 0.068050099 | 0.121179053 | 0.17503255 | 520 | 520 |
| TADA3     | 0.068010628 | 0.121395525 | 0.17530755 | 520 | 520 |
| BHLHE40   | 0.067959142 | 0.12167834  | 0.1756908  | 520 | 520 |
| FAM58B    | 0.067939976 | 0.121783755 | 0.17580524 | 520 | 458 |
| SENP7     | 0.06789901  | 0.122009303 | 0.17609302 | 520 | 520 |
| RAB3C     | 0.067856751 | 0.122242308 | 0.17636619 | 520 | 366 |
| ABCC3     | 0.067830542 | 0.122386992 | 0.1765623  | 520 | 520 |
| KDSR      | 0.067825363 | 0.122415604 | 0.17659095 | 520 | 520 |
| C15orf5   | 0.067815419 | 0.122470543 | 0.17665756 | 520 | 175 |
| LARP1     | 0.067790431 | 0.122608684 | 0.17684417 | 520 | 520 |
| SNX30     | 0.067778545 | 0.12267444  | 0.17692636 | 520 | 520 |
| INCA1     | 0.067773538 | 0.122702142 | 0.17695365 | 520 | 520 |
| TUBG2     | 0.067739043 | 0.12289316  | 0.17719111 | 520 | 520 |
| PPP2R2B   | 0.067707897 | 0.123065823 | 0.17737664 | 520 | 518 |
| N4BP1     | 0.067695398 | 0.12313517  | 0.17746391 | 520 | 520 |
| FAM86B2   | 0.067677917 | 0.123232206 | 0.17759107 | 520 | 457 |
| LEMD3     | 0.067586474 | 0.123740777 | 0.17826963 | 520 | 520 |
| LOC285456 | 0.067585308 | 0.12374727  | 0.17826963 | 520 | 307 |
| AKNA      | 0.067580046 | 0.123776589 | 0.17829912 | 520 | 520 |
| AVPR1B    | 0.067577667 | 0.123789844 | 0.17830548 | 520 | 141 |
| GALNT11   | 0.067558631 | 0.12389595  | 0.17843282 | 520 | 520 |
| TUSC5     | 0.06753626  | 0.124020742 | 0.17858703 | 520 | 312 |
| GPR157    | 0.067480937 | 0.12432976  | 0.17899367 | 520 | 520 |
| ZMYM1     | 0.067447221 | 0.124518381 | 0.17923962 | 520 | 520 |
| C2orf16   | 0.067297828 | 0.125356828 | 0.18033068 | 520 | 520 |
| C12orf77  | 0.067272935 | 0.12549696  | 0.18051938 | 520 | 194 |
| CTU2      | 0.06719595  | 0.125931114 | 0.18109499 | 520 | 520 |
| HCRTR1    | 0.067195608 | 0.125933048 | 0.18109499 | 520 | 253 |
| BLID      | 0.06718981  | 0.125965794 | 0.18112916 | 520 | 63  |
| C21orf128 | 0.06708401  | 0.126564476 | 0.18192516 | 520 | 282 |
| ADH1B     | 0.067079769 | 0.126588525 | 0.18194675 | 520 | 406 |
| FGD2      | 0.06707647  | 0.126607228 | 0.18196067 | 520 | 520 |
| UBE4B     | 0.067049076 | 0.126762644 | 0.18217105 | 520 | 520 |
| TMSB15A   | 0.066974577 | 0.127186045 | 0.18274045 | 520 | 499 |
| ASIP      | 0.066956337 | 0.127289871 | 0.18287659 | 520 | 364 |
| ZNF774    | 0.066896522 | 0.127630829 | 0.18327277 | 520 | 519 |
| SLC5A12   | 0.066895206 | 0.127638338 | 0.18327277 | 520 | 494 |
| HSDL1     | 0.06687815  | 0.127735692 | 0.18339949 | 520 | 520 |
| DCAF4     | 0.06686357  | 0.127818963 | 0.18350506 | 520 | 520 |

|              |             |             |            |     |     |
|--------------|-------------|-------------|------------|-----|-----|
| EIF4B        | 0.066860497 | 0.127836518 | 0.18350506 | 520 | 520 |
| CNKSRR2      | 0.066846512 | 0.127916439 | 0.18360671 | 520 | 389 |
| RCOR2        | 0.066740223 | 0.128525107 | 0.18437537 | 520 | 520 |
| TFIP11       | 0.066684143 | 0.128847153 | 0.18481107 | 520 | 520 |
| OR2L13       | 0.066618025 | 0.129227649 | 0.18534365 | 520 | 224 |
| ATXN7L1      | 0.066599271 | 0.129335728 | 0.18545908 | 520 | 520 |
| MAGEA1       | 0.066560542 | 0.129559154 | 0.18576625 | 520 | 255 |
| C6orf64      | 0.066533772 | 0.129713761 | 0.18596341 | 520 | 520 |
| LST-3TM12    | 0.06653354  | 0.129715104 | 0.18596341 | 520 | 312 |
| TAB1         | 0.066529045 | 0.129741082 | 0.18598743 | 520 | 520 |
| A4GNT        | 0.066487686 | 0.129980267 | 0.18630382 | 520 | 298 |
| BMS1         | 0.066482686 | 0.130009206 | 0.18632661 | 520 | 520 |
| PDCD11       | 0.066458823 | 0.130147389 | 0.18647708 | 520 | 520 |
| CSPP1        | 0.066441225 | 0.130249365 | 0.18659668 | 520 | 520 |
| FAM117A      | 0.066423341 | 0.130353064 | 0.18673197 | 520 | 520 |
| ARHGEF1      | 0.066419766 | 0.130373799 | 0.18673514 | 520 | 520 |
| FAM127A      | 0.066313214 | 0.130993028 | 0.18758209 | 520 | 520 |
| UBE2Z        | 0.066284815 | 0.13115845  | 0.18780564 | 520 | 520 |
| SLC16A7      | 0.066281323 | 0.131178804 | 0.18780848 | 520 | 520 |
| RHOT1        | 0.066240439 | 0.131417267 | 0.18808274 | 520 | 520 |
| KIAA0753     | 0.066238397 | 0.131429182 | 0.18808645 | 520 | 520 |
| RSPH3        | 0.066233352 | 0.131458634 | 0.18811524 | 520 | 520 |
| TRIM6-TRIM34 | 0.06621939  | 0.131540167 | 0.18821856 | 520 | 46  |
| USP8         | 0.066210323 | 0.131593136 | 0.18828099 | 520 | 520 |
| AREG         | 0.066154824 | 0.131917711 | 0.18869183 | 520 | 520 |
| TRIM2        | 0.066144134 | 0.131980304 | 0.18876797 | 520 | 520 |
| TMEM138      | 0.066093789 | 0.13227538  | 0.18916317 | 520 | 520 |
| PLK2         | 0.066061467 | 0.132465093 | 0.18942104 | 520 | 520 |
| THBD         | 0.06605371  | 0.132510652 | 0.18947276 | 520 | 520 |
| PIWIL1       | 0.066035102 | 0.132619996 | 0.18960221 | 520 | 337 |
| RFX7         | 0.066033117 | 0.132631659 | 0.18960544 | 520 | 520 |
| RGS9         | 0.065987504 | 0.1329      | 0.18997558 | 520 | 518 |
| SFTPA2       | 0.065964613 | 0.133034822 | 0.19015483 | 520 | 442 |
| MLH3         | 0.065962165 | 0.133049253 | 0.19015865 | 520 | 520 |
| TPSD1        | 0.06595821  | 0.13307256  | 0.19015865 | 520 | 410 |
| TRAF3        | 0.065953123 | 0.133102538 | 0.19017178 | 520 | 520 |
| ICMT         | 0.065952999 | 0.133103268 | 0.19017178 | 520 | 520 |
| POU3F4       | 0.065926326 | 0.133260568 | 0.19038303 | 520 | 118 |
| UBB          | 0.06589454  | 0.133448202 | 0.19061058 | 520 | 520 |
| VARS         | 0.065890097 | 0.133474443 | 0.19063456 | 520 | 520 |
| ABHD8        | 0.065888224 | 0.133485507 | 0.19063686 | 520 | 520 |
| NACC2        | 0.065884256 | 0.133508952 | 0.19064333 | 520 | 520 |
| IFIT1        | 0.065860561 | 0.133649009 | 0.1908163  | 520 | 520 |
| LPIN1        | 0.065853744 | 0.133689318 | 0.19086034 | 520 | 520 |
| OR7E156P     | 0.065827276 | 0.133845934 | 0.1910704  | 520 | 46  |
| ZNF500       | 0.065813055 | 0.133930141 | 0.19117707 | 520 | 520 |

|           |             |             |            |     |     |
|-----------|-------------|-------------|------------|-----|-----|
| B3GALNT1  | 0.065794569 | 0.134039666 | 0.19131987 | 520 | 520 |
| SPNS1     | 0.065765248 | 0.134213524 | 0.19155447 | 520 | 520 |
| COL20A1   | 0.065727289 | 0.134438853 | 0.19182175 | 520 | 135 |
| DHX36     | 0.065690202 | 0.134659294 | 0.19206731 | 520 | 520 |
| C13orf28  | 0.065687679 | 0.1346743   | 0.19206731 | 520 | 3   |
| FOXN2     | 0.065687119 | 0.134677632 | 0.19206731 | 520 | 520 |
| MBOAT7    | 0.065671724 | 0.134769229 | 0.19218166 | 520 | 520 |
| LOC342346 | 0.065659691 | 0.134840854 | 0.1922593  | 520 | 407 |
| CMTM2     | 0.065575261 | 0.135344251 | 0.19289521 | 520 | 497 |
| C11orf88  | 0.065564755 | 0.135406989 | 0.19297099 | 520 | 461 |
| POLR2J2   | 0.065535478 | 0.135581947 | 0.19320667 | 520 | 518 |
| DOPEY1    | 0.065481086 | 0.135907457 | 0.19357477 | 520 | 520 |
| GAS2      | 0.065430333 | 0.136211727 | 0.1939535  | 520 | 465 |
| AMAC1L3   | 0.06541861  | 0.136282086 | 0.19403982 | 520 | 272 |
| KIAA0513  | 0.06538194  | 0.136502341 | 0.19428483 | 520 | 520 |
| ANP32D    | 0.065377542 | 0.136528777 | 0.19430874 | 520 | 284 |
| SLC6A15   | 0.065355649 | 0.136660422 | 0.19446865 | 520 | 516 |
| NUP93     | 0.065340245 | 0.136753112 | 0.19457308 | 520 | 520 |
| BTLA      | 0.065306364 | 0.136957147 | 0.19483589 | 520 | 512 |
| ALG12     | 0.065292142 | 0.137042862 | 0.19493032 | 520 | 520 |
| WDR88     | 0.065286886 | 0.137074548 | 0.19496164 | 520 | 482 |
| ACCSL     | 0.065256569 | 0.137257441 | 0.195208   | 520 | 30  |
| WDR64     | 0.065238943 | 0.137363859 | 0.19530425 | 520 | 297 |
| LMAN2L    | 0.065218687 | 0.137486231 | 0.19546445 | 520 | 520 |
| GABRR3    | 0.065171778 | 0.137769953 | 0.19583865 | 520 | 23  |
| ZNF182    | 0.065078148 | 0.138337592 | 0.19656396 | 520 | 520 |
| LMBR1L    | 0.065064595 | 0.138419907 | 0.19666707 | 520 | 520 |
| GALNT3    | 0.065057405 | 0.138463591 | 0.19671527 | 520 | 520 |
| ALG1      | 0.065014195 | 0.138726346 | 0.19700246 | 520 | 520 |
| NECAB2    | 0.065012917 | 0.138734125 | 0.19700246 | 520 | 454 |
| GBP1      | 0.064987661 | 0.138887889 | 0.19716526 | 520 | 520 |
| LOC727924 | 0.064960931 | 0.139050769 | 0.1973687  | 520 | 31  |
| DISC2     | 0.064934551 | 0.139211653 | 0.19756924 | 520 | 180 |
| KIAA1045  | 0.06489311  | 0.139464693 | 0.19788657 | 520 | 519 |
| PDP1      | 0.064889726 | 0.139485371 | 0.19790199 | 520 | 520 |
| FGF19     | 0.06480063  | 0.140030637 | 0.19860574 | 520 | 345 |
| IL20      | 0.064789091 | 0.140101377 | 0.19868432 | 520 | 494 |
| C1orf200  | 0.064788377 | 0.140105752 | 0.19868432 | 520 | 350 |
| LAIR2     | 0.064689275 | 0.140714428 | 0.19949137 | 520 | 495 |
| SLC2A4    | 0.064685318 | 0.140738775 | 0.19951186 | 520 | 518 |
| CTCF      | 0.064661344 | 0.140886345 | 0.19969297 | 520 | 517 |
| ZNF184    | 0.064649762 | 0.140957677 | 0.19978004 | 520 | 520 |
| TRPV3     | 0.064581444 | 0.141379017 | 0.20033031 | 520 | 513 |
| RFK       | 0.064566507 | 0.141471262 | 0.2004375  | 520 | 520 |
| OR4K1     | 0.064513729 | 0.141797586 | 0.2008575  | 520 | 11  |
| DMRTC1    | 0.064487458 | 0.141960232 | 0.20104552 | 520 | 15  |

|              |             |             |            |     |     |
|--------------|-------------|-------------|------------|-----|-----|
| SNORA55      | 0.064397067 | 0.142520944 | 0.20178292 | 520 | 14  |
| FKBP15       | 0.064394009 | 0.142539939 | 0.20179564 | 520 | 520 |
| AHRR         | 0.064376652 | 0.142647817 | 0.20193419 | 520 | 520 |
| FAM120A      | 0.064355001 | 0.14278246  | 0.20209641 | 520 | 520 |
| CPB2         | 0.064327808 | 0.142951716 | 0.20230758 | 520 | 234 |
| ZNF566       | 0.064313971 | 0.143037895 | 0.20240437 | 520 | 520 |
| KIAA1217     | 0.064312065 | 0.143049767 | 0.20240437 | 520 | 520 |
| ALMS1P       | 0.064274093 | 0.143286487 | 0.20267097 | 520 | 411 |
| PRB1         | 0.064269971 | 0.143312208 | 0.20268972 | 520 | 223 |
| POU4F2       | 0.064241216 | 0.143491693 | 0.2029202  | 520 | 77  |
| PEX5         | 0.064237568 | 0.143514474 | 0.2029202  | 520 | 520 |
| BEND2        | 0.064208514 | 0.143696021 | 0.20316131 | 520 | 99  |
| STRN3        | 0.064189992 | 0.14381185  | 0.20329656 | 520 | 520 |
| CDHR2        | 0.064184334 | 0.143847248 | 0.20333235 | 520 | 467 |
| ANKRD27      | 0.064178945 | 0.143880968 | 0.20335203 | 520 | 520 |
| GRIK3        | 0.064178885 | 0.143881343 | 0.20335203 | 520 | 409 |
| PITPNB       | 0.064157488 | 0.144015293 | 0.20352708 | 520 | 520 |
| C18orf34     | 0.064144136 | 0.144098921 | 0.20361672 | 520 | 362 |
| CASP5        | 0.064068833 | 0.14457129  | 0.20421264 | 520 | 505 |
| SF3B3        | 0.064061262 | 0.144618852 | 0.20426552 | 520 | 520 |
| NRBP2        | 0.063927126 | 0.145463413 | 0.20535581 | 520 | 520 |
| VENTXP1      | 0.063925727 | 0.145472247 | 0.20535581 | 520 | 25  |
| CSNK1G3      | 0.063886542 | 0.145719689 | 0.20562867 | 520 | 520 |
| NGEF         | 0.063869524 | 0.145827252 | 0.20575612 | 520 | 520 |
| SH2D1A       | 0.063844897 | 0.145983018 | 0.20596149 | 520 | 518 |
| LRRTM4       | 0.063834965 | 0.146045875 | 0.20603575 | 520 | 285 |
| NISCH        | 0.063832172 | 0.146063555 | 0.20604628 | 520 | 520 |
| SPTLC2       | 0.063800548 | 0.146263844 | 0.2062711  | 520 | 520 |
| OR4N4        | 0.063723308 | 0.146753923 | 0.20690726 | 520 | 58  |
| METRN        | 0.063721593 | 0.146764821 | 0.20690726 | 520 | 520 |
| FATE1        | 0.063721369 | 0.146766243 | 0.20690726 | 520 | 465 |
| RUNDC2C      | 0.063671326 | 0.147084453 | 0.20731238 | 520 | 513 |
| GABRB3       | 0.063654491 | 0.147191615 | 0.20744892 | 520 | 474 |
| PAGE2B       | 0.063638174 | 0.147295546 | 0.20753738 | 520 | 214 |
| CCDC28B      | 0.063633308 | 0.147326544 | 0.20756655 | 520 | 520 |
| LOC100271722 | 0.063594296 | 0.147575291 | 0.20784439 | 520 | 520 |
| MED12L       | 0.063556288 | 0.147817933 | 0.20812798 | 520 | 515 |
| DACT2        | 0.063543666 | 0.147898582 | 0.20822699 | 520 | 504 |
| SOCS6        | 0.063541742 | 0.147910876 | 0.20822976 | 520 | 520 |
| C14orf167    | 0.063492121 | 0.148228271 | 0.20864746 | 520 | 520 |
| KCNU1        | 0.063446411 | 0.148521111 | 0.20895756 | 520 | 134 |
| ZNF507       | 0.063410776 | 0.148749707 | 0.20926457 | 520 | 520 |
| RPRD1B       | 0.063396675 | 0.148840239 | 0.20934812 | 520 | 520 |
| GNPAT        | 0.063357509 | 0.149091918 | 0.20967286 | 520 | 520 |
| SNAP91       | 0.063313231 | 0.149376828 | 0.21005889 | 520 | 348 |
| ARPM1        | 0.063304586 | 0.149432505 | 0.2101096  | 520 | 520 |

|           |             |             |            |     |     |
|-----------|-------------|-------------|------------|-----|-----|
| KIF12     | 0.063295938 | 0.14948822  | 0.21014225 | 520 | 513 |
| IPCEF1    | 0.063236252 | 0.149873152 | 0.21062463 | 520 | 519 |
| HECTD3    | 0.063220635 | 0.149973995 | 0.21075166 | 520 | 520 |
| C2orf52   | 0.063149066 | 0.150436793 | 0.21131365 | 520 | 482 |
| C20orf191 | 0.063103391 | 0.150732718 | 0.21168509 | 520 | 39  |
| LOC572558 | 0.063096151 | 0.150779666 | 0.21172153 | 520 | 129 |
| GNPTG     | 0.063055907 | 0.151040826 | 0.21201443 | 520 | 520 |
| LOC153910 | 0.063022717 | 0.151256477 | 0.21228758 | 520 | 146 |
| TPR       | 0.063019241 | 0.151279074 | 0.21230451 | 520 | 520 |
| NXF4      | 0.063015817 | 0.151301333 | 0.2123062  | 520 | 34  |
| SORT1     | 0.063012502 | 0.151322894 | 0.21232168 | 520 | 520 |
| TFDP3     | 0.063010314 | 0.151337118 | 0.21232686 | 520 | 203 |
| DAZ2      | 0.062908453 | 0.152000675 | 0.21316884 | 520 | 33  |
| STOX2     | 0.062876896 | 0.152206696 | 0.21342808 | 520 | 518 |
| CTAGE1    | 0.062814663 | 0.152613602 | 0.2139689  | 520 | 517 |
| SFRS13B   | 0.062799755 | 0.152711199 | 0.21409085 | 520 | 514 |
| LOC723972 | 0.062719738 | 0.153235853 | 0.21475172 | 520 | 520 |
| C21orf121 | 0.062667349 | 0.153580098 | 0.21514444 | 520 | 243 |
| NPTX1     | 0.062644831 | 0.153728239 | 0.21533701 | 520 | 507 |
| PIK3C2G   | 0.06258651  | 0.154112431 | 0.21583019 | 520 | 471 |
| ICAM3     | 0.062541255 | 0.154411053 | 0.21621526 | 520 | 520 |
| DDIT4     | 0.062539967 | 0.154419557 | 0.21621526 | 520 | 520 |
| MDGA2     | 0.06253644  | 0.154442852 | 0.21621893 | 520 | 190 |
| LOC286238 | 0.062497826 | 0.154698033 | 0.21653    | 520 | 52  |
| CST7      | 0.062467507 | 0.154898624 | 0.21679571 | 520 | 520 |
| DERL3     | 0.062452944 | 0.154995046 | 0.21691561 | 520 | 520 |
| SLC14A1   | 0.062438979 | 0.155087547 | 0.21699033 | 520 | 503 |
| KIF1C     | 0.062422802 | 0.15519475  | 0.21711975 | 520 | 520 |
| DPPA4     | 0.062332659 | 0.155793164 | 0.21788258 | 520 | 294 |
| ISG20L2   | 0.062332527 | 0.155794042 | 0.21788258 | 520 | 520 |
| ZNF639    | 0.06228746  | 0.156093874 | 0.21824136 | 520 | 520 |
| CSPG4PY2  | 0.062285173 | 0.156109102 | 0.21824752 | 520 | 21  |
| PRAC      | 0.062268176 | 0.156222301 | 0.21839063 | 520 | 51  |
| ABCE1     | 0.06221277  | 0.156591749 | 0.21889193 | 520 | 520 |
| PCBP2     | 0.062188681 | 0.156752579 | 0.21907118 | 520 | 520 |
| RNGTT     | 0.062136028 | 0.157104549 | 0.21951744 | 520 | 520 |
| SNORA4    | 0.062133065 | 0.157124371 | 0.21952992 | 520 | 60  |
| LONRF2    | 0.062116458 | 0.157235525 | 0.21965478 | 520 | 486 |
| PRSS53    | 0.062060819 | 0.157608338 | 0.2201146  | 520 | 520 |
| OR6K3     | 0.062038854 | 0.157755702 | 0.22030514 | 520 | 52  |
| PPME1     | 0.062015658 | 0.157911438 | 0.22049209 | 520 | 520 |
| VPS24     | 0.062000949 | 0.158010255 | 0.22061479 | 520 | 520 |
| TRIM52    | 0.061961324 | 0.158276686 | 0.22097148 | 520 | 519 |
| COL9A3    | 0.061956504 | 0.158309112 | 0.22100145 | 520 | 520 |
| TTC30B    | 0.061938598 | 0.158429641 | 0.2211544  | 520 | 519 |
| EXOGL     | 0.061864273 | 0.15893067  | 0.22174633 | 520 | 520 |

|            |             |             |            |     |     |
|------------|-------------|-------------|------------|-----|-----|
| PPP1R2P1   | 0.061842648 | 0.159076667 | 0.22191932 | 520 | 515 |
| SH2D5      | 0.061826348 | 0.159186783 | 0.22199615 | 520 | 520 |
| HOXB4      | 0.061725675 | 0.159868158 | 0.2228693  | 520 | 514 |
| F11        | 0.061655398 | 0.160345106 | 0.2234737  | 520 | 94  |
| RNF6       | 0.061630023 | 0.160517581 | 0.2236664  | 520 | 520 |
| FBXW11     | 0.061622903 | 0.160566    | 0.22371841 | 520 | 520 |
| ZFP14      | 0.061602366 | 0.160705725 | 0.22389762 | 520 | 520 |
| CDHR1      | 0.061562147 | 0.160979627 | 0.22423413 | 520 | 520 |
| IFNK       | 0.061539327 | 0.161135191 | 0.22443393 | 520 | 303 |
| ZNF747     | 0.061528565 | 0.161208595 | 0.22452066 | 520 | 520 |
| KIAA2026   | 0.061512803 | 0.161316149 | 0.22465494 | 520 | 520 |
| MCF2L      | 0.061455988 | 0.161704278 | 0.22516436 | 520 | 520 |
| SFRS2B     | 0.061429872 | 0.161882922 | 0.22536642 | 520 | 520 |
| POM121L4P  | 0.061387697 | 0.162171736 | 0.22572174 | 520 | 222 |
| PDE3B      | 0.061354996 | 0.162395939 | 0.2260182  | 520 | 520 |
| ZNF563     | 0.061330172 | 0.162566289 | 0.22620845 | 520 | 520 |
| CPNE8      | 0.061314419 | 0.162674459 | 0.22632773 | 520 | 520 |
| FAM49B     | 0.061299864 | 0.162774455 | 0.22644743 | 520 | 520 |
| NFATC3     | 0.061298627 | 0.162782955 | 0.22644743 | 520 | 520 |
| DSC1       | 0.061292352 | 0.162826079 | 0.22649179 | 520 | 505 |
| C2orf44    | 0.061266816 | 0.16300167  | 0.22670476 | 520 | 520 |
| KBTBD8     | 0.06126336  | 0.163025441 | 0.22672219 | 520 | 520 |
| EGR1       | 0.061215832 | 0.163352666 | 0.22714593 | 520 | 520 |
| TXNDC12    | 0.061204475 | 0.163430929 | 0.22723909 | 520 | 520 |
| LIMD1      | 0.061179161 | 0.163605476 | 0.22743473 | 520 | 520 |
| CLIP4      | 0.061174062 | 0.16364065  | 0.22746795 | 520 | 520 |
| ANGPTL6    | 0.061075797 | 0.164319652 | 0.22831735 | 520 | 515 |
| TREML1     | 0.06101629  | 0.164731869 | 0.22884281 | 520 | 494 |
| C8orf84    | 0.061002783 | 0.164825541 | 0.22894139 | 520 | 520 |
| CD200R1    | 0.060981143 | 0.164975702 | 0.22910262 | 520 | 516 |
| KHDRBS2    | 0.060962494 | 0.165105189 | 0.2292406  | 520 | 155 |
| GLCE       | 0.060957037 | 0.165143095 | 0.22927192 | 520 | 520 |
| LGALS12    | 0.060840425 | 0.165954652 | 0.23027179 | 520 | 449 |
| KRTAP2-4   | 0.060797824 | 0.166251876 | 0.23063659 | 520 | 14  |
| ADAM8      | 0.060781901 | 0.166363072 | 0.23077497 | 520 | 520 |
| RGS7BP     | 0.060699934 | 0.166936358 | 0.23139511 | 520 | 344 |
| GTF2IRD2P1 | 0.06069768  | 0.166952143 | 0.23140109 | 520 | 520 |
| LOC374443  | 0.06068788  | 0.167020789 | 0.23144851 | 520 | 520 |
| SGSM1      | 0.060671628 | 0.167134677 | 0.23157449 | 520 | 505 |
| DMRT3      | 0.060618975 | 0.167504053 | 0.23200657 | 520 | 501 |
| PAR4       | 0.060562133 | 0.167903494 | 0.23247999 | 520 | 28  |
| CNR1       | 0.060557394 | 0.167936827 | 0.23251017 | 520 | 487 |
| MTNR1B     | 0.060544125 | 0.168030187 | 0.23262346 | 520 | 103 |
| STK25      | 0.060531498 | 0.168119071 | 0.23273053 | 520 | 520 |
| CD3G       | 0.060498164 | 0.168353871 | 0.23302358 | 520 | 515 |
| C2orf141   | 0.060453668 | 0.168667685 | 0.23342589 | 520 | 401 |

|              |             |             |            |     |     |
|--------------|-------------|-------------|------------|-----|-----|
| LINGO4       | 0.060369422 | 0.169263033 | 0.23420159 | 520 | 370 |
| GRK4         | 0.060341413 | 0.169461317 | 0.23445986 | 520 | 520 |
| ZFYVE20      | 0.060333885 | 0.169514637 | 0.23451754 | 520 | 520 |
| PENK         | 0.06032816  | 0.169555198 | 0.23454224 | 520 | 487 |
| DHX8         | 0.060322305 | 0.169596681 | 0.23457705 | 520 | 520 |
| PRSSL1       | 0.060321246 | 0.169604186 | 0.23457705 | 520 | 205 |
| AGTR2        | 0.0603184   | 0.169624355 | 0.23458885 | 520 | 140 |
| CARM1        | 0.060303755 | 0.169728175 | 0.23470024 | 520 | 520 |
| ZNF189       | 0.060248834 | 0.170117934 | 0.23519081 | 520 | 520 |
| CLDN12       | 0.060165572 | 0.170710101 | 0.23594473 | 520 | 520 |
| FBXO2        | 0.060087967 | 0.171263415 | 0.23661084 | 520 | 520 |
| CHST8        | 0.060086464 | 0.171274142 | 0.23661084 | 520 | 472 |
| TH           | 0.060072609 | 0.171373072 | 0.23673129 | 520 | 477 |
| LOC100128640 | 0.060065704 | 0.171422394 | 0.23676698 | 520 | 516 |
| RAP1GAP2     | 0.060062974 | 0.171441893 | 0.23677769 | 520 | 520 |
| SPOPL        | 0.059931435 | 0.172383539 | 0.23788268 | 520 | 520 |
| CDH3         | 0.059829532 | 0.173115681 | 0.23879495 | 520 | 520 |
| FGD4         | 0.059765808 | 0.173574687 | 0.23937898 | 520 | 520 |
| MCHR2        | 0.059693438 | 0.174097075 | 0.23998451 | 520 | 145 |
| C13orf23     | 0.059678134 | 0.174207696 | 0.24012058 | 520 | 520 |
| LOC151658    | 0.059667146 | 0.174287149 | 0.24021368 | 520 | 58  |
| PGBD3        | 0.059655024 | 0.174374836 | 0.24031811 | 520 | 520 |
| SP8          | 0.059553319 | 0.175111824 | 0.24125135 | 520 | 407 |
| C20orf202    | 0.059551005 | 0.175128619 | 0.24125801 | 520 | 514 |
| SLC7A1       | 0.059536709 | 0.175232409 | 0.2413845  | 520 | 520 |
| B2M          | 0.05948747  | 0.175590227 | 0.24182784 | 520 | 520 |
| DLG2         | 0.059473118 | 0.17569462  | 0.24195508 | 520 | 491 |
| CST5         | 0.059454927 | 0.175827011 | 0.24212087 | 520 | 105 |
| DR1          | 0.059440904 | 0.175929116 | 0.24222838 | 520 | 520 |
| CCL26        | 0.05943772  | 0.175952309 | 0.24223657 | 520 | 517 |
| FAH          | 0.05942707  | 0.176029892 | 0.24230217 | 520 | 520 |
| C4orf47      | 0.059426948 | 0.176030775 | 0.24230217 | 520 | 506 |
| METTL2B      | 0.059425194 | 0.176043559 | 0.24230323 | 520 | 520 |
| DRD1         | 0.059358259 | 0.176531779 | 0.24285917 | 520 | 364 |
| EFNA2        | 0.059328875 | 0.176746418 | 0.24308811 | 520 | 233 |
| TMEM232      | 0.059322077 | 0.176796105 | 0.24312328 | 520 | 466 |
| RPA4         | 0.059313577 | 0.176858246 | 0.24318369 | 520 | 356 |
| MGAT4B       | 0.059278209 | 0.177116978 | 0.24346491 | 520 | 520 |
| NUP210L      | 0.059172431 | 0.177892464 | 0.2443976  | 520 | 298 |
| SNORA25      | 0.059160147 | 0.17798269  | 0.2445049  | 520 | 23  |
| RENBP        | 0.059143797 | 0.178102824 | 0.24461994 | 520 | 520 |
| MRGPRX1      | 0.059139759 | 0.178132506 | 0.24464404 | 520 | 77  |
| INSL5        | 0.059125533 | 0.178237096 | 0.24475434 | 520 | 78  |
| HECTD1       | 0.059073605 | 0.178619261 | 0.24524573 | 520 | 520 |
| ZNF668       | 0.059059728 | 0.178721497 | 0.2453673  | 520 | 520 |
| ARL8A        | 0.058985316 | 0.179270427 | 0.24608952 | 520 | 520 |

|              |             |             |            |     |     |
|--------------|-------------|-------------|------------|-----|-----|
| PRRT1        | 0.058974685 | 0.179348955 | 0.24618055 | 520 | 520 |
| KCNJ3        | 0.058963356 | 0.179432666 | 0.24627869 | 520 | 104 |
| OR2L1P       | 0.058902013 | 0.179886433 | 0.2468847  | 520 | 98  |
| LOC143188    | 0.058899175 | 0.179907445 | 0.24689674 | 520 | 520 |
| LOC284379    | 0.058892205 | 0.179959067 | 0.24693996 | 520 | 92  |
| RAPH1        | 0.058887177 | 0.179996305 | 0.24696826 | 520 | 520 |
| C3orf70      | 0.058851304 | 0.180262182 | 0.24728258 | 520 | 519 |
| LIN28B       | 0.058828858 | 0.180428691 | 0.24749416 | 520 | 202 |
| HACE1        | 0.05880661  | 0.18059384  | 0.24770384 | 520 | 520 |
| ANKAR        | 0.058796933 | 0.180665705 | 0.24778556 | 520 | 517 |
| HSPA2        | 0.058760154 | 0.180939055 | 0.24811997 | 520 | 520 |
| FMO5         | 0.05875402  | 0.18098467  | 0.24815505 | 520 | 519 |
| PIN1L        | 0.058749101 | 0.181021258 | 0.24815505 | 520 | 516 |
| PRMT8        | 0.058740983 | 0.181081651 | 0.24821883 | 520 | 374 |
| CTCF         | 0.058739538 | 0.181092403 | 0.24821883 | 520 | 520 |
| B3GAT3       | 0.058733154 | 0.181139914 | 0.2482502  | 520 | 520 |
| IFITM5       | 0.058683446 | 0.181510136 | 0.24870688 | 520 | 107 |
| SMCHD1       | 0.058606117 | 0.182087191 | 0.24937894 | 520 | 520 |
| BBS7         | 0.058475151 | 0.183067591 | 0.25060251 | 520 | 520 |
| ZNF808       | 0.058460262 | 0.183179299 | 0.25072138 | 520 | 520 |
| CFHR4        | 0.058445827 | 0.183287644 | 0.25085265 | 520 | 178 |
| SF1          | 0.058374482 | 0.183823843 | 0.25148409 | 520 | 520 |
| MFSD1        | 0.058361291 | 0.183923112 | 0.25158942 | 520 | 520 |
| ZNF30        | 0.058360935 | 0.183925791 | 0.25158942 | 520 | 519 |
| INTS8        | 0.058356717 | 0.183957537 | 0.25161578 | 520 | 520 |
| PLB1         | 0.058289969 | 0.18446051  | 0.25223021 | 520 | 520 |
| GDAP1L1      | 0.0582865   | 0.184486675 | 0.25223687 | 520 | 317 |
| SLC39A3      | 0.058261751 | 0.18467344  | 0.25245798 | 520 | 520 |
| SLMO1        | 0.058258946 | 0.184694619 | 0.25246982 | 520 | 520 |
| HLA-DMA      | 0.058220532 | 0.184984816 | 0.25283223 | 520 | 520 |
| WISP3        | 0.058217046 | 0.185011164 | 0.2528511  | 520 | 484 |
| NUDT9P1      | 0.058186019 | 0.185245822 | 0.25312033 | 520 | 413 |
| HSPA7        | 0.058147197 | 0.185539743 | 0.25348759 | 520 | 520 |
| NCRNA00028   | 0.058130089 | 0.185669376 | 0.25363033 | 520 | 100 |
| PAGE3        | 0.058128316 | 0.185682815 | 0.25363151 | 520 | 29  |
| FGGY         | 0.058122025 | 0.185730509 | 0.25367947 | 520 | 520 |
| LOC162632    | 0.058102847 | 0.185875941 | 0.25384372 | 520 | 520 |
| OR2L2        | 0.058068324 | 0.186137954 | 0.25413269 | 520 | 213 |
| LOC100129066 | 0.058057362 | 0.186221208 | 0.25422914 | 520 | 423 |
| PLSCR4       | 0.058041714 | 0.186340094 | 0.25437119 | 520 | 520 |
| ZNF800       | 0.058019479 | 0.186509124 | 0.25454859 | 520 | 520 |
| GPR153       | 0.05801827  | 0.186518321 | 0.25454859 | 520 | 520 |
| EGFL7        | 0.057996856 | 0.186681223 | 0.25475367 | 520 | 520 |
| NAPSB        | 0.057979752 | 0.186811417 | 0.25489019 | 520 | 520 |
| AIG1         | 0.057965572 | 0.186919402 | 0.25499241 | 520 | 520 |
| HLA-DRB6     | 0.0579543   | 0.187005276 | 0.2550923  | 520 | 516 |



|           |             |             |            |     |     |
|-----------|-------------|-------------|------------|-----|-----|
| SNORA66   | 0.057940679 | 0.187109082 | 0.25519937 | 520 | 10  |
| CD2AP     | 0.057932613 | 0.187170568 | 0.25526597 | 520 | 520 |
| PRDM10    | 0.057859319 | 0.187730012 | 0.25592347 | 520 | 520 |
| GNAT3     | 0.057856542 | 0.187751237 | 0.25592347 | 520 | 57  |
| IFNA2     | 0.057856421 | 0.187752158 | 0.25592347 | 520 | 19  |
| ATXN7     | 0.057856152 | 0.187754211 | 0.25592347 | 520 | 520 |
| TESC      | 0.057796161 | 0.188213072 | 0.25651425 | 520 | 520 |
| EXOC7     | 0.057793224 | 0.188235562 | 0.25652757 | 520 | 520 |
| LOC222699 | 0.057788215 | 0.188273912 | 0.25655328 | 520 | 519 |
| NFE2      | 0.057776779 | 0.188361502 | 0.25662982 | 520 | 517 |
| SSTR4     | 0.057767945 | 0.188429176 | 0.25668733 | 520 | 70  |
| C10orf82  | 0.057764612 | 0.188454715 | 0.25670478 | 520 | 343 |
| C4orf29   | 0.057762947 | 0.188467476 | 0.25670482 | 520 | 520 |
| MAGEA6    | 0.057761221 | 0.1884807   | 0.25670549 | 520 | 428 |
| HSPA8     | 0.057745063 | 0.188604565 | 0.2568395  | 520 | 520 |
| H19       | 0.057625548 | 0.189522572 | 0.25799675 | 520 | 520 |
| C3orf21   | 0.057618169 | 0.189579358 | 0.25799675 | 520 | 520 |
| ITGB8     | 0.057603939 | 0.189688901 | 0.25810696 | 520 | 520 |
| SELENBP1  | 0.05756659  | 0.189976641 | 0.25844616 | 520 | 520 |
| AIRE      | 0.05751706  | 0.190358714 | 0.258931   | 520 | 291 |
| HEATR7B2  | 0.057497425 | 0.190510338 | 0.25910381 | 520 | 44  |
| C12orf72  | 0.057448715 | 0.190886859 | 0.25956185 | 520 | 520 |
| CXADRP2   | 0.057414218 | 0.191153846 | 0.25983728 | 520 | 475 |
| TNNT2     | 0.057379919 | 0.191419575 | 0.26011054 | 520 | 517 |
| KIAA1143  | 0.057378663 | 0.191429307 | 0.26011054 | 520 | 520 |
| AZU1      | 0.05733363  | 0.191778619 | 0.26052847 | 520 | 328 |
| CD82      | 0.057314795 | 0.191924851 | 0.26067444 | 520 | 520 |
| FBXL18    | 0.057294647 | 0.192081375 | 0.26086946 | 520 | 520 |
| KDM4B     | 0.057247734 | 0.192446186 | 0.26131211 | 520 | 520 |
| BCAS4     | 0.057221506 | 0.192650366 | 0.26151892 | 520 | 520 |
| NARS2     | 0.057210282 | 0.192737788 | 0.26161998 | 520 | 520 |
| C15orf34  | 0.057206877 | 0.192764318 | 0.26163838 | 520 | 518 |
| SLC44A1   | 0.057203119 | 0.192793598 | 0.26164968 | 520 | 520 |
| ZBTB40    | 0.05720247  | 0.192798654 | 0.26164968 | 520 | 520 |
| ZNF215    | 0.057195345 | 0.19285418  | 0.26168988 | 520 | 511 |
| LOC55908  | 0.057164766 | 0.19309262  | 0.26194292 | 520 | 242 |
| ODF2      | 0.057145264 | 0.193244792 | 0.26211408 | 520 | 520 |
| ARL2      | 0.057111349 | 0.193509651 | 0.26242038 | 520 | 520 |
| EFHB      | 0.057097109 | 0.193620935 | 0.26252904 | 520 | 443 |
| SLC35A5   | 0.057096097 | 0.193628839 | 0.26252904 | 520 | 520 |
| LGALS9    | 0.057027974 | 0.194161881 | 0.26318097 | 520 | 520 |
| JRK       | 0.056948591 | 0.194784378 | 0.26393604 | 520 | 520 |
| CCNK      | 0.056925445 | 0.194966155 | 0.2641646  | 520 | 520 |
| PPM1L     | 0.056905438 | 0.195123376 | 0.2643421  | 520 | 520 |
| LIPG      | 0.056878459 | 0.19533554  | 0.2646039  | 520 | 520 |
| SUSD3     | 0.056816018 | 0.195827219 | 0.26522435 | 520 | 520 |

|            |             |             |            |     |     |
|------------|-------------|-------------|------------|-----|-----|
| TRAPPC9    | 0.056810058 | 0.1958742   | 0.26527016 | 520 | 520 |
| FAM75C1    | 0.056800134 | 0.195952443 | 0.26532266 | 520 | 173 |
| HDAC6      | 0.05678296  | 0.196087894 | 0.26547041 | 520 | 520 |
| TECTB      | 0.056746999 | 0.19637175  | 0.26580117 | 520 | 11  |
| DCDC2      | 0.056705227 | 0.196701856 | 0.26617651 | 520 | 469 |
| LTBP4      | 0.056695405 | 0.196779529 | 0.26624588 | 520 | 520 |
| CLEC10A    | 0.056693681 | 0.196793168 | 0.26624647 | 520 | 520 |
| MAGEA8     | 0.056678636 | 0.1969122   | 0.26637177 | 520 | 285 |
| LRRC23     | 0.056658707 | 0.197069946 | 0.26656728 | 520 | 520 |
| LOC148696  | 0.056605109 | 0.197494673 | 0.26705221 | 520 | 309 |
| SLC13A5    | 0.056557444 | 0.197872947 | 0.26754577 | 520 | 501 |
| DUSP14     | 0.056510286 | 0.198247714 | 0.26799859 | 520 | 520 |
| ZBTB12     | 0.056492776 | 0.198387005 | 0.26813296 | 520 | 520 |
| HLA-DQB2   | 0.056403459 | 0.19909859  | 0.26895049 | 520 | 520 |
| FOXI3      | 0.056364507 | 0.199409508 | 0.2693344  | 520 | 307 |
| MBL1P      | 0.056339924 | 0.199605911 | 0.26958162 | 520 | 449 |
| FAM138B    | 0.056327483 | 0.199705361 | 0.26966175 | 520 | 13  |
| SPTBN4     | 0.056321346 | 0.199754429 | 0.26970994 | 520 | 517 |
| FBXO41     | 0.056316859 | 0.199790313 | 0.26974033 | 520 | 520 |
| FABP4      | 0.05628309  | 0.200060514 | 0.27005089 | 520 | 519 |
| NUFIP1     | 0.056214987 | 0.200606255 | 0.27071507 | 520 | 520 |
| NCRNA00174 | 0.05611905  | 0.201376881 | 0.27160959 | 520 | 520 |
| RYR1       | 0.056088087 | 0.201626051 | 0.27189911 | 520 | 520 |
| OR10S1     | 0.056086045 | 0.201642494 | 0.27189911 | 520 | 84  |
| OLFM3      | 0.056085674 | 0.201645474 | 0.27189911 | 520 | 119 |
| OR56A5     | 0.055988415 | 0.202429674 | 0.27282882 | 520 | 118 |
| KRTAP21-2  | 0.055969804 | 0.202579987 | 0.2729816  | 520 | 24  |
| PITPNM2    | 0.055964831 | 0.202620161 | 0.27301256 | 520 | 520 |
| LRPAP1     | 0.055958387 | 0.202672236 | 0.27306448 | 520 | 520 |
| ZBTB43     | 0.055938315 | 0.202834488 | 0.27324657 | 520 | 520 |
| RNASE10    | 0.055834811 | 0.203672682 | 0.27419255 | 520 | 505 |
| HUS1       | 0.05578927  | 0.204042278 | 0.2746276  | 520 | 520 |
| TMED8      | 0.055750916 | 0.204353926 | 0.2749995  | 520 | 520 |
| C6orf195   | 0.05568664  | 0.204876971 | 0.27564818 | 520 | 325 |
| FAM66A     | 0.055637718 | 0.205275723 | 0.27614782 | 520 | 248 |
| CHD2       | 0.055545035 | 0.206032704 | 0.27707373 | 520 | 520 |
| FOLH1B     | 0.055515637 | 0.206273232 | 0.27736019 | 520 | 349 |
| MBNL1      | 0.055480435 | 0.206561516 | 0.27769227 | 520 | 520 |
| SLC35E4    | 0.055470311 | 0.206644484 | 0.27778529 | 520 | 520 |
| ADNP2      | 0.055415846 | 0.207091218 | 0.27833015 | 520 | 520 |
| RFPL3      | 0.055406448 | 0.207168375 | 0.2784153  | 520 | 129 |
| KIAA0922   | 0.055380889 | 0.207378318 | 0.27867887 | 520 | 520 |
| SGMS1      | 0.055358492 | 0.207562409 | 0.27890766 | 520 | 520 |
| TMEM50A    | 0.055307101 | 0.207985275 | 0.27942002 | 520 | 520 |
| RINT1      | 0.055294749 | 0.208087003 | 0.27953806 | 520 | 520 |
| LTB        | 0.055277913 | 0.208225717 | 0.27970577 | 520 | 520 |

|           |             |             |            |     |     |
|-----------|-------------|-------------|------------|-----|-----|
| USP4      | 0.055262382 | 0.208353743 | 0.27984046 | 520 | 520 |
| VPS53     | 0.055256733 | 0.208400316 | 0.27988437 | 520 | 520 |
| AKAP7     | 0.055248967 | 0.208464369 | 0.27995175 | 520 | 520 |
| INSL4     | 0.055217742 | 0.208722025 | 0.28021493 | 520 | 138 |
| RASSF9    | 0.055216797 | 0.208729829 | 0.28021493 | 520 | 517 |
| OR1Q1     | 0.055205904 | 0.208819773 | 0.28029836 | 520 | 164 |
| LOC643923 | 0.055170641 | 0.209111128 | 0.2806334  | 520 | 112 |
| CT45A6    | 0.055073209 | 0.209917673 | 0.28164083 | 520 | 104 |
| SNAPC1    | 0.055050505 | 0.210105943 | 0.28187467 | 520 | 520 |
| STK32C    | 0.055027002 | 0.210300958 | 0.28204247 | 520 | 520 |
| DCT       | 0.054983089 | 0.210665685 | 0.28249404 | 520 | 208 |
| GPRIN1    | 0.05496224  | 0.210839011 | 0.28270766 | 520 | 520 |
| GLRA4     | 0.054949186 | 0.210947589 | 0.28281643 | 520 | 257 |
| CT47B1    | 0.054940668 | 0.211018456 | 0.28287303 | 520 | 41  |
| DDX3Y     | 0.054849957 | 0.211774221 | 0.28379181 | 520 | 469 |
| CT47A2    | 0.054841053 | 0.211848514 | 0.28383478 | 520 | 7   |
| MOBKL2A   | 0.054835978 | 0.211890864 | 0.2838704  | 520 | 520 |
| CEP164    | 0.054798655 | 0.212202513 | 0.28421464 | 520 | 520 |
| POU1F1    | 0.054784551 | 0.212320375 | 0.28432658 | 520 | 70  |
| RHPN2     | 0.054762535 | 0.212504434 | 0.28452453 | 520 | 520 |
| UTS2D     | 0.054760786 | 0.212519064 | 0.28452522 | 520 | 426 |
| ZNF490    | 0.054747785 | 0.21262782  | 0.28465193 | 520 | 520 |
| FAM55B    | 0.054731939 | 0.212760423 | 0.28481054 | 520 | 241 |
| NGB       | 0.054640172 | 0.213529541 | 0.2857832  | 520 | 403 |
| MAGEA11   | 0.054617937 | 0.213716202 | 0.28599506 | 520 | 379 |
| OR2AG2    | 0.054572469 | 0.214098252 | 0.28643028 | 520 | 148 |
| WIF1      | 0.054563669 | 0.214172256 | 0.28649274 | 520 | 350 |
| ZFP30     | 0.054563538 | 0.214173359 | 0.28649274 | 520 | 520 |
| FOXM1     | 0.05455325  | 0.214259898 | 0.28657048 | 520 | 520 |
| DHX9      | 0.054538847 | 0.214381089 | 0.28671356 | 520 | 520 |
| FAM118A   | 0.054489181 | 0.21479938  | 0.28721583 | 520 | 520 |
| PRAMEF16  | 0.054487184 | 0.214816214 | 0.28721929 | 520 | 52  |
| ZNF271    | 0.054480958 | 0.214868687 | 0.28725328 | 520 | 520 |
| OR2C3     | 0.054479354 | 0.214882209 | 0.28725328 | 520 | 57  |
| C8orf39   | 0.05446978  | 0.214962934 | 0.28733925 | 520 | 517 |
| ZRANB1    | 0.054444621 | 0.21517516  | 0.28754669 | 520 | 520 |
| IL15      | 0.054427242 | 0.215321851 | 0.28772364 | 520 | 520 |
| PIAS1     | 0.054356713 | 0.215917895 | 0.28841761 | 520 | 520 |
| C14orf101 | 0.054355636 | 0.215927009 | 0.28841761 | 520 | 520 |
| LOC285768 | 0.054350689 | 0.215968863 | 0.28843994 | 520 | 410 |
| NR3C2     | 0.054350279 | 0.215972335 | 0.28843994 | 520 | 518 |
| MLXIPL    | 0.054333545 | 0.216113949 | 0.28859355 | 520 | 493 |
| BEX5      | 0.054331614 | 0.216130294 | 0.28859355 | 520 | 508 |
| GCC1      | 0.054318716 | 0.216239503 | 0.28872026 | 520 | 520 |
| GPRC5C    | 0.054297216 | 0.216421634 | 0.2889443  | 520 | 520 |
| PKD2L2    | 0.054259988 | 0.216737254 | 0.28930822 | 520 | 263 |

|           |             |             |            |     |     |
|-----------|-------------|-------------|------------|-----|-----|
| VAMP4     | 0.054247171 | 0.216845997 | 0.28943421 | 520 | 520 |
| NR1I2     | 0.05423873  | 0.216917626 | 0.28951066 | 520 | 361 |
| TSPAN33   | 0.054236432 | 0.216937135 | 0.28951753 | 520 | 520 |
| RIMS1     | 0.054234635 | 0.216952387 | 0.28951873 | 520 | 367 |
| PIGM      | 0.054163116 | 0.217560084 | 0.29025285 | 520 | 520 |
| LPAL2     | 0.054105248 | 0.218052686 | 0.29083307 | 520 | 480 |
| EPRS      | 0.054101988 | 0.21808046  | 0.29085088 | 520 | 520 |
| PFN4      | 0.054098487 | 0.218110292 | 0.29087142 | 520 | 500 |
| PLEK2     | 0.054068278 | 0.218367809 | 0.29117633 | 520 | 520 |
| DCAF4L2   | 0.054046417 | 0.218554305 | 0.29140574 | 520 | 72  |
| HYMAI     | 0.054025346 | 0.218734163 | 0.29158771 | 520 | 390 |
| C11orf46  | 0.054023256 | 0.218752012 | 0.29159222 | 520 | 520 |
| TAS2R3    | 0.054018659 | 0.218791262 | 0.29162527 | 520 | 149 |
| NLRP5     | 0.053998899 | 0.218960066 | 0.2917924  | 520 | 95  |
| QSOX2     | 0.053995832 | 0.218986274 | 0.29180804 | 520 | 520 |
| C9orf139  | 0.05398737  | 0.219058591 | 0.29186583 | 520 | 473 |
| SLC22A1   | 0.053981202 | 0.219111317 | 0.29191679 | 520 | 515 |
| GBP5      | 0.053978771 | 0.219132099 | 0.29192519 | 520 | 520 |
| GNAQ      | 0.053972909 | 0.219182221 | 0.29195338 | 520 | 520 |
| HLA-B     | 0.053926476 | 0.219579524 | 0.29244396 | 520 | 520 |
| TUBA3E    | 0.053916315 | 0.21966654  | 0.29254053 | 520 | 340 |
| ESPNL     | 0.053899694 | 0.219808923 | 0.29269148 | 520 | 510 |
| IFNA13    | 0.053876237 | 0.220009972 | 0.29290117 | 520 | 260 |
| CHAT      | 0.053863336 | 0.220120609 | 0.29302911 | 520 | 185 |
| KRTAP19-5 | 0.053824733 | 0.220451891 | 0.29341201 | 520 | 24  |
| MRPL10    | 0.053805625 | 0.220616001 | 0.29358178 | 520 | 520 |
| C2orf61   | 0.053804796 | 0.220623128 | 0.29358178 | 520 | 224 |
| ERLIN1    | 0.05375292  | 0.221069124 | 0.29411704 | 520 | 520 |
| XRCC5     | 0.053749722 | 0.221096636 | 0.29413423 | 520 | 520 |
| DHFRL1    | 0.053722741 | 0.22132888  | 0.29440435 | 520 | 520 |
| GOLGA6C   | 0.0537179   | 0.221370562 | 0.29444037 | 520 | 54  |
| LOC158572 | 0.05369441  | 0.221572928 | 0.29467066 | 520 | 518 |
| C1orf25   | 0.053683333 | 0.221668397 | 0.29477818 | 520 | 520 |
| OGDH      | 0.05363554  | 0.222080653 | 0.29528746 | 520 | 520 |
| RSPO1     | 0.053623908 | 0.222181079 | 0.29539255 | 520 | 484 |
| PGS1      | 0.053591115 | 0.222464351 | 0.29571964 | 520 | 520 |
| SEC11A    | 0.053574247 | 0.22261017  | 0.29589397 | 520 | 520 |
| EIF1B     | 0.05342146  | 0.223934015 | 0.29751634 | 520 | 520 |
| SLC15A3   | 0.053417556 | 0.223967912 | 0.29754177 | 520 | 520 |
| CBLN1     | 0.053401312 | 0.224109009 | 0.2977096  | 520 | 406 |
| RELB      | 0.053357426 | 0.224490518 | 0.29817712 | 520 | 520 |
| IL2RG     | 0.053343241 | 0.224613925 | 0.29830173 | 520 | 520 |
| NAB2      | 0.053317476 | 0.224838203 | 0.29857992 | 520 | 520 |
| AHCTF1    | 0.053304132 | 0.224954423 | 0.29871459 | 520 | 520 |
| TM4SF20   | 0.053262956 | 0.225313326 | 0.29913957 | 520 | 195 |
| SPATA5    | 0.053214949 | 0.225732275 | 0.2996291  | 520 | 520 |

|              |             |             |            |     |     |
|--------------|-------------|-------------|------------|-----|-----|
| MLL4         | 0.053179137 | 0.226045155 | 0.29998516 | 520 | 520 |
| PNPLA5       | 0.053154286 | 0.226262459 | 0.30023402 | 520 | 218 |
| LHFPL5       | 0.05314547  | 0.226339584 | 0.30027767 | 520 | 376 |
| TNNI3K       | 0.053082388 | 0.226891986 | 0.30089115 | 520 | 493 |
| GOLGA6L5     | 0.053074814 | 0.226958379 | 0.30095941 | 520 | 516 |
| OR2W3        | 0.053066369 | 0.227032422 | 0.3010378  | 520 | 353 |
| MCM3AP       | 0.052984958 | 0.227747058 | 0.30190597 | 520 | 520 |
| URB2         | 0.052981985 | 0.22777319  | 0.30192076 | 520 | 520 |
| TMX1         | 0.052978252 | 0.227805995 | 0.30194439 | 520 | 520 |
| NUP62        | 0.05295895  | 0.227975697 | 0.30212961 | 520 | 520 |
| NMT1         | 0.052952902 | 0.228028892 | 0.30218024 | 520 | 520 |
| SFTPBP       | 0.052928907 | 0.228240011 | 0.30240039 | 520 | 455 |
| ZNF572       | 0.052905371 | 0.228447229 | 0.30263517 | 520 | 518 |
| RASL10A      | 0.05286685  | 0.228786672 | 0.30304503 | 520 | 514 |
| NANP         | 0.05285711  | 0.228872553 | 0.30313887 | 520 | 520 |
| KCTD11       | 0.05282118  | 0.229189566 | 0.30351888 | 520 | 520 |
| SLC25A12     | 0.052815918 | 0.229236019 | 0.30356046 | 520 | 520 |
| LOC84856     | 0.052756311 | 0.229762703 | 0.30419797 | 520 | 520 |
| ARHGAP9      | 0.052753197 | 0.229790247 | 0.3042078  | 520 | 520 |
| ZNF527       | 0.052752061 | 0.229800294 | 0.3042078  | 520 | 520 |
| ZNF567       | 0.052729946 | 0.229995935 | 0.30440683 | 520 | 520 |
| LINGO3       | 0.052724845 | 0.230041085 | 0.3044466  | 520 | 282 |
| C3orf20      | 0.052675122 | 0.230481466 | 0.30498939 | 520 | 216 |
| C12orf63     | 0.0526383   | 0.230807973 | 0.30530123 | 520 | 474 |
| A1CF         | 0.052611045 | 0.231049855 | 0.30552097 | 520 | 67  |
| ALDH1A3      | 0.052486038 | 0.232161586 | 0.30683006 | 520 | 520 |
| C16orf82     | 0.052478979 | 0.232224476 | 0.30689306 | 520 | 87  |
| DLG5         | 0.052446123 | 0.232517358 | 0.30723984 | 520 | 520 |
| LOC100268168 | 0.052383895 | 0.233072784 | 0.30795358 | 520 | 517 |
| ODF3L2       | 0.05237854  | 0.23312062  | 0.3079966  | 520 | 427 |
| KDM5D        | 0.052368446 | 0.233210823 | 0.30805523 | 520 | 446 |
| C16orf72     | 0.052314841 | 0.233690231 | 0.30858741 | 520 | 520 |
| IREB2        | 0.052311479 | 0.233720321 | 0.30860694 | 520 | 520 |
| HS6ST2       | 0.052287439 | 0.233935564 | 0.3088507  | 520 | 515 |
| DICER1       | 0.052261937 | 0.23416405  | 0.30911188 | 520 | 520 |
| CDCP2        | 0.05222929  | 0.23445679  | 0.30943754 | 520 | 271 |
| TRPC5        | 0.052150609 | 0.235163358 | 0.31020764 | 520 | 195 |
| P4HTM        | 0.052125005 | 0.235393605 | 0.31043013 | 520 | 520 |
| TEAD4        | 0.052109838 | 0.235530074 | 0.31058979 | 520 | 520 |
| VTCN1        | 0.052100653 | 0.235612749 | 0.31067849 | 520 | 493 |
| C17orf57     | 0.05204702  | 0.236095889 | 0.31127485 | 520 | 515 |
| ZNF514       | 0.05203507  | 0.236203638 | 0.31139654 | 520 | 520 |
| NUDT13       | 0.052009743 | 0.236432108 | 0.31166422 | 520 | 520 |
| PGAM2        | 0.051955816 | 0.23691909  | 0.31221728 | 520 | 519 |
| ANUBL1       | 0.051943699 | 0.237028605 | 0.31234118 | 520 | 520 |
| LMF2         | 0.051885749 | 0.237552876 | 0.31297068 | 520 | 520 |

|           |             |             |            |     |     |
|-----------|-------------|-------------|------------|-----|-----|
| CCDC117   | 0.051875023 | 0.237650009 | 0.31307819 | 520 | 520 |
| FXYD7     | 0.051865639 | 0.237735001 | 0.3131697  | 520 | 496 |
| CPPED1    | 0.051857649 | 0.237807392 | 0.31322413 | 520 | 520 |
| AEN       | 0.051691598 | 0.239315307 | 0.31500449 | 520 | 520 |
| CX3CL1    | 0.051672957 | 0.239485005 | 0.31520729 | 520 | 520 |
| PLCG2     | 0.051658237 | 0.239619069 | 0.31532199 | 520 | 520 |
| WNT7B     | 0.051650918 | 0.239685745 | 0.31538915 | 520 | 520 |
| SIX5      | 0.051643969 | 0.239749061 | 0.31545188 | 520 | 520 |
| HTR3C     | 0.051574692 | 0.24038096  | 0.31616836 | 520 | 253 |
| SLC2A4RG  | 0.051573956 | 0.240387675 | 0.31616836 | 520 | 520 |
| NDST4     | 0.051475962 | 0.24128352  | 0.31728452 | 520 | 77  |
| HIRA      | 0.051449227 | 0.241528329 | 0.31758193 | 520 | 520 |
| TNFAIP8L1 | 0.051445895 | 0.241558856 | 0.31758445 | 520 | 520 |
| VWC2L     | 0.051402658 | 0.24195518  | 0.31800579 | 520 | 14  |
| KRIT1     | 0.051390128 | 0.242070123 | 0.31811144 | 520 | 520 |
| OPRM1     | 0.051381474 | 0.242149525 | 0.31819505 | 520 | 111 |
| CT62      | 0.051368585 | 0.242267827 | 0.31831938 | 520 | 421 |
| TCF20     | 0.051367726 | 0.242275716 | 0.31831938 | 520 | 520 |
| AVPR2     | 0.051357811 | 0.242366746 | 0.31838728 | 520 | 513 |
| YWHAB     | 0.051357453 | 0.24237004  | 0.31838728 | 520 | 520 |
| OR51T1    | 0.051355455 | 0.242388383 | 0.31838728 | 520 | 18  |
| TKTL1     | 0.051355219 | 0.242390554 | 0.31838728 | 520 | 365 |
| ERMAP     | 0.051353122 | 0.242409812 | 0.31839184 | 520 | 520 |
| MFNG      | 0.05133855  | 0.242543661 | 0.31852614 | 520 | 520 |
| MTA1      | 0.051329813 | 0.242623939 | 0.31859941 | 520 | 520 |
| COMMD7    | 0.051327416 | 0.242645965 | 0.31859941 | 520 | 520 |
| YY1       | 0.051327319 | 0.242646854 | 0.31859941 | 520 | 520 |
| RAB6A     | 0.051317004 | 0.242741662 | 0.31870314 | 520 | 520 |
| LY75      | 0.051303363 | 0.24286708  | 0.31883816 | 520 | 520 |
| ATP9B     | 0.051269257 | 0.243180863 | 0.31919665 | 520 | 520 |
| SLC35B3   | 0.051212965 | 0.24369937  | 0.31979397 | 520 | 520 |
| CHD7      | 0.051174829 | 0.244051081 | 0.32017215 | 520 | 520 |
| PSAPL1    | 0.051131533 | 0.244450808 | 0.32059227 | 520 | 484 |
| C8orf75   | 0.051112118 | 0.244630215 | 0.32080669 | 520 | 394 |
| LCN6      | 0.05110649  | 0.244682236 | 0.32083318 | 520 | 279 |
| KIRREL2   | 0.051059612 | 0.245115841 | 0.32135994 | 520 | 450 |
| OR1E1     | 0.051041143 | 0.245286814 | 0.32154228 | 520 | 55  |
| HERC4     | 0.050988514 | 0.245774497 | 0.32213969 | 520 | 520 |
| TMEM194B  | 0.050982431 | 0.245830912 | 0.32219269 | 520 | 520 |
| MGC27382  | 0.050956992 | 0.246066912 | 0.32248103 | 520 | 117 |
| PGA5      | 0.050952942 | 0.246104503 | 0.32250934 | 520 | 249 |
| DNMT1     | 0.050925518 | 0.246359135 | 0.32278009 | 520 | 520 |
| TARSL2    | 0.050882782 | 0.246756297 | 0.32323744 | 520 | 520 |
| PIP4K2C   | 0.050838619 | 0.247167191 | 0.32368019 | 520 | 520 |
| GUCY2F    | 0.050837829 | 0.247174544 | 0.32368019 | 520 | 117 |
| COMMD5    | 0.050821555 | 0.247326079 | 0.32385759 | 520 | 520 |

|              |             |             |            |     |     |
|--------------|-------------|-------------|------------|-----|-----|
| GOLGA7B      | 0.050812642 | 0.247409103 | 0.32394527 | 520 | 520 |
| C7orf49      | 0.050810139 | 0.247432424 | 0.32395477 | 520 | 520 |
| DNM1L        | 0.050795977 | 0.247564389 | 0.3241065  | 520 | 520 |
| MTHFD2       | 0.050792288 | 0.24759877  | 0.32413047 | 520 | 520 |
| CARS2        | 0.050722446 | 0.248250352 | 0.32489908 | 520 | 520 |
| IRF4         | 0.05070645  | 0.248399755 | 0.32507351 | 520 | 520 |
| NPY          | 0.050680781 | 0.248639634 | 0.3253452  | 520 | 122 |
| IPO11        | 0.05063942  | 0.249026485 | 0.32573944 | 520 | 520 |
| RP1L1        | 0.050615972 | 0.249245986 | 0.32599053 | 520 | 519 |
| RNF13        | 0.050602182 | 0.24937514  | 0.32611715 | 520 | 520 |
| OR5B3        | 0.050594991 | 0.249442509 | 0.32614179 | 520 | 4   |
| EGLN3        | 0.050534327 | 0.250011336 | 0.32680076 | 520 | 520 |
| EFNB1        | 0.050516394 | 0.250179659 | 0.32697911 | 520 | 520 |
| LOC285796    | 0.050516335 | 0.250180208 | 0.32697911 | 520 | 129 |
| UBE2E2       | 0.050510969 | 0.250230591 | 0.32702376 | 520 | 520 |
| CXCR3        | 0.050495496 | 0.250375914 | 0.32717127 | 520 | 519 |
| RASSF6       | 0.050491378 | 0.250414595 | 0.32720062 | 520 | 519 |
| DDX60        | 0.05048584  | 0.250466622 | 0.32724739 | 520 | 520 |
| NCRNA00171   | 0.050470454 | 0.25061122  | 0.32740523 | 520 | 520 |
| TDRD12       | 0.05046953  | 0.250619902 | 0.32740523 | 520 | 382 |
| XAGE3        | 0.050440807 | 0.250890006 | 0.32773685 | 520 | 42  |
| SLC19A1      | 0.050430318 | 0.250988689 | 0.32782329 | 520 | 520 |
| CDH9         | 0.050382714 | 0.251436897 | 0.32825986 | 520 | 80  |
| SH3GL3       | 0.050349349 | 0.251751378 | 0.3286066  | 520 | 515 |
| DLEU2L       | 0.050317489 | 0.252051918 | 0.32893404 | 520 | 516 |
| C11orf74     | 0.050305127 | 0.252168604 | 0.3290447  | 520 | 520 |
| SHKBP1       | 0.050281788 | 0.252388996 | 0.32928966 | 520 | 520 |
| DSCR4        | 0.050240982 | 0.252774663 | 0.3297715  | 520 | 58  |
| SLC30A8      | 0.050223042 | 0.252944341 | 0.32997151 | 520 | 292 |
| C14orf159    | 0.050211955 | 0.25304924  | 0.33006565 | 520 | 520 |
| OR3A1        | 0.050192964 | 0.253229004 | 0.3302574  | 520 | 87  |
| FTSJD1       | 0.050189798 | 0.253258983 | 0.33027124 | 520 | 520 |
| MVP          | 0.050155983 | 0.253579302 | 0.33065009 | 520 | 520 |
| DEFB109P1B   | 0.050086019 | 0.254242957 | 0.33149402 | 520 | 9   |
| FAM151B      | 0.050079977 | 0.254300323 | 0.33154738 | 520 | 520 |
| PLA2G2D      | 0.050051992 | 0.254566154 | 0.3318725  | 520 | 492 |
| MLH1         | 0.050034758 | 0.25472996  | 0.33206458 | 520 | 520 |
| GPATCH2      | 0.05003015  | 0.254773771 | 0.33210022 | 520 | 520 |
| SLAMF6       | 0.050021049 | 0.254860312 | 0.33219155 | 520 | 520 |
| CRTAM        | 0.0500153   | 0.25491499  | 0.33221987 | 520 | 517 |
| EIF2AK1      | 0.049995587 | 0.255102538 | 0.33242132 | 520 | 520 |
| TMEM156      | 0.049936586 | 0.255664444 | 0.33310849 | 520 | 519 |
| LOC100190938 | 0.049935014 | 0.255679431 | 0.33310849 | 520 | 509 |
| TCL6         | 0.049921957 | 0.255803898 | 0.33324911 | 520 | 332 |
| C10orf129    | 0.049816029 | 0.256815257 | 0.33444802 | 520 | 58  |
| AKNAD1       | 0.04975177  | 0.257430125 | 0.33515115 | 520 | 471 |

|            |             |             |            |     |     |
|------------|-------------|-------------|------------|-----|-----|
| CD96       | 0.049695276 | 0.257971527 | 0.33581265 | 520 | 520 |
| ZFP161     | 0.049663545 | 0.258275969 | 0.33618725 | 520 | 520 |
| NCR1       | 0.049637984 | 0.258521391 | 0.33644155 | 520 | 407 |
| USP46      | 0.049624012 | 0.258655609 | 0.3365945  | 520 | 520 |
| C6orf182   | 0.049597877 | 0.258906796 | 0.33689963 | 520 | 520 |
| FAM55A     | 0.049553267 | 0.25933594  | 0.33739273 | 520 | 80  |
| GDF2       | 0.049545948 | 0.2594064   | 0.33744085 | 520 | 19  |
| VWDE       | 0.049521681 | 0.259640097 | 0.33765772 | 520 | 405 |
| OR5T3      | 0.049482287 | 0.26001978  | 0.33808095 | 520 | 4   |
| GGT7       | 0.049480956 | 0.260032609 | 0.33808095 | 520 | 520 |
| SLC7A9     | 0.04944308  | 0.260398038 | 0.33849059 | 520 | 434 |
| SCARNA17   | 0.049424079 | 0.260581494 | 0.3386854  | 520 | 505 |
| SERPINA10  | 0.049419986 | 0.260621025 | 0.33871494 | 520 | 305 |
| PBX1       | 0.049412566 | 0.260692694 | 0.33873242 | 520 | 520 |
| PRKAG2     | 0.049412079 | 0.260697395 | 0.33873242 | 520 | 520 |
| ZNF322B    | 0.049391891 | 0.26089247  | 0.33893665 | 520 | 520 |
| SLC6A18    | 0.049362299 | 0.261178592 | 0.33924232 | 520 | 29  |
| TFAP2D     | 0.049360597 | 0.261195055 | 0.33924232 | 520 | 51  |
| UBA1       | 0.049353598 | 0.261262763 | 0.33930841 | 520 | 520 |
| SDHA       | 0.049350457 | 0.261293156 | 0.33932603 | 520 | 520 |
| NXF2B      | 0.049328318 | 0.261507418 | 0.3395824  | 520 | 47  |
| C14orf21   | 0.049317449 | 0.261612659 | 0.33967532 | 520 | 520 |
| OR1L3      | 0.049283827 | 0.261938377 | 0.34005443 | 520 | 29  |
| VWA2       | 0.049259928 | 0.262170081 | 0.34031969 | 520 | 520 |
| NTN3       | 0.04925927  | 0.262176459 | 0.34031969 | 520 | 357 |
| ABHD14A    | 0.049246979 | 0.262295672 | 0.34045252 | 520 | 520 |
| INHBC      | 0.049243946 | 0.262325101 | 0.3404688  | 520 | 384 |
| RIMS3      | 0.049239287 | 0.262370304 | 0.34050555 | 520 | 520 |
| IL1RAPL1   | 0.049170976 | 0.263033699 | 0.34121278 | 520 | 244 |
| CCDC111    | 0.049139728 | 0.263337547 | 0.34156299 | 520 | 520 |
| ERCC8      | 0.049109927 | 0.263627547 | 0.34187317 | 520 | 520 |
| CHURC1     | 0.049072297 | 0.26399405  | 0.34226491 | 520 | 520 |
| DCUN1D1    | 0.04906689  | 0.264046741 | 0.3422847  | 520 | 520 |
| RBBP9      | 0.049061466 | 0.264099601 | 0.34233121 | 520 | 520 |
| SHCBP1     | 0.049055581 | 0.26415697  | 0.34238357 | 520 | 520 |
| ZIC1       | 0.049044553 | 0.264264488 | 0.34247889 | 520 | 393 |
| RFXAP      | 0.049000545 | 0.264693852 | 0.34288197 | 520 | 520 |
| ANKRD36B   | 0.049000475 | 0.264694541 | 0.34288197 | 520 | 515 |
| NCRNA00120 | 0.048981935 | 0.264875564 | 0.34307238 | 520 | 520 |
| GH1        | 0.04897963  | 0.26489808  | 0.34307672 | 520 | 159 |
| XG         | 0.048952667 | 0.265161526 | 0.3433325  | 520 | 520 |
| GATS       | 0.048859823 | 0.266070035 | 0.34437616 | 520 | 520 |
| KRTAP1-1   | 0.048839538 | 0.266268811 | 0.34459661 | 520 | 135 |
| MUC7       | 0.048838954 | 0.266274535 | 0.34459661 | 520 | 250 |
| XPOT       | 0.048801974 | 0.266637187 | 0.34502164 | 520 | 520 |
| OR5P2      | 0.048783316 | 0.266820277 | 0.34521425 | 520 | 46  |



|           |             |             |            |     |     |
|-----------|-------------|-------------|------------|-----|-----|
| NUDT17    | 0.048777168 | 0.266880637 | 0.34527019 | 520 | 520 |
| THEG      | 0.048743027 | 0.267215947 | 0.34565963 | 520 | 432 |
| KRTAP11-1 | 0.048730786 | 0.267336243 | 0.34573418 | 520 | 151 |
| RSAD2     | 0.048730184 | 0.267342162 | 0.34573418 | 520 | 520 |
| LBXCOR1   | 0.048718637 | 0.267455675 | 0.34583662 | 520 | 502 |
| ADPGK     | 0.048682923 | 0.267806969 | 0.34622426 | 520 | 520 |
| CST3      | 0.048649946 | 0.268131613 | 0.34653287 | 520 | 520 |
| MAD2L2    | 0.048627092 | 0.268356769 | 0.34680163 | 520 | 520 |
| RNF185    | 0.048617579 | 0.268450518 | 0.34690055 | 520 | 520 |
| KRTAP5-11 | 0.048569566 | 0.268924061 | 0.34749021 | 520 | 68  |
| SEZ6      | 0.048520377 | 0.269409792 | 0.34809554 | 520 | 271 |
| SLC7A5P1  | 0.048471483 | 0.269893216 | 0.34867547 | 520 | 389 |
| FBXO11    | 0.048437806 | 0.270226516 | 0.34903898 | 520 | 520 |
| PRAMEF1   | 0.048435905 | 0.270245346 | 0.34904094 | 520 | 64  |
| GCSH      | 0.048410176 | 0.270500194 | 0.34929087 | 520 | 515 |
| DPEP3     | 0.048402388 | 0.270577369 | 0.34933551 | 520 | 354 |
| CLEC7A    | 0.048368464 | 0.270913703 | 0.34972496 | 520 | 520 |
| PUS10     | 0.048359006 | 0.271007521 | 0.34980128 | 520 | 520 |
| DNAH1     | 0.048339391 | 0.271202165 | 0.35003011 | 520 | 520 |
| GRM3      | 0.048324694 | 0.271348076 | 0.35012879 | 520 | 333 |
| FKBP1B    | 0.048278404 | 0.271807974 | 0.35065489 | 520 | 520 |
| LOC387647 | 0.048274216 | 0.271849613 | 0.35066616 | 520 | 520 |
| MAFG      | 0.048274027 | 0.271851488 | 0.35066616 | 520 | 520 |
| LOC729678 | 0.048259152 | 0.271999407 | 0.35083006 | 520 | 520 |
| GAGE2D    | 0.04825775  | 0.272013349 | 0.35083006 | 520 | 145 |
| CBLL1     | 0.048237845 | 0.272211379 | 0.35104056 | 520 | 520 |
| PLA2G2C   | 0.048231027 | 0.27227923  | 0.35108316 | 520 | 8   |
| CCDC151   | 0.048213327 | 0.272455427 | 0.35124069 | 520 | 506 |
| RPS15AP10 | 0.048212019 | 0.27246846  | 0.35124069 | 520 | 461 |
| UGCG      | 0.048211755 | 0.272471081 | 0.35124069 | 520 | 520 |
| AGA       | 0.048171321 | 0.272873909 | 0.35167004 | 520 | 520 |
| DPY19L2P2 | 0.048164201 | 0.272944881 | 0.35173903 | 520 | 518 |
| TAF13     | 0.048083012 | 0.273755102 | 0.35269298 | 520 | 520 |
| MBP       | 0.048078738 | 0.273797799 | 0.35272546 | 520 | 520 |
| NF1P1     | 0.048048596 | 0.274099046 | 0.35302332 | 520 | 54  |
| PPP1R14C  | 0.048028976 | 0.274295254 | 0.3532309  | 520 | 520 |
| NECAP2    | 0.048022227 | 0.27436277  | 0.35329529 | 520 | 520 |
| C20orf132 | 0.047980888 | 0.274776566 | 0.35376035 | 520 | 520 |
| PCDHB9    | 0.047973779 | 0.274847762 | 0.35382942 | 520 | 520 |
| LOC389634 | 0.047968149 | 0.27490416  | 0.35387944 | 520 | 482 |
| LOC253724 | 0.047911833 | 0.275468731 | 0.35458356 | 520 | 517 |
| TWISTNB   | 0.047884461 | 0.275743422 | 0.35489183 | 520 | 520 |
| PCDHA5    | 0.047874171 | 0.275846731 | 0.35500214 | 520 | 212 |
| GOLGA6B   | 0.047852394 | 0.276065468 | 0.3552383  | 520 | 307 |
| ADAM21    | 0.047829804 | 0.276292482 | 0.35550773 | 520 | 466 |
| LMO2      | 0.047821768 | 0.276373274 | 0.35558899 | 520 | 520 |

|           |             |             |            |     |     |
|-----------|-------------|-------------|------------|-----|-----|
| TUSC1     | 0.047817233 | 0.276418874 | 0.35562497 | 520 | 520 |
| TMEM48    | 0.047757723 | 0.277017718 | 0.3563272  | 520 | 520 |
| GAGE2C    | 0.047755182 | 0.277043306 | 0.35633739 | 520 | 63  |
| ZNF17     | 0.047749637 | 0.277099158 | 0.35638649 | 520 | 520 |
| MMADHC    | 0.047728798 | 0.277309109 | 0.35663377 | 520 | 520 |
| BTBD12    | 0.047701165 | 0.27758768  | 0.35692059 | 520 | 520 |
| ERCC3     | 0.047696226 | 0.277637489 | 0.35694225 | 520 | 520 |
| MTNR1A    | 0.047678419 | 0.277817122 | 0.35715043 | 520 | 286 |
| ZNF780B   | 0.047669471 | 0.277907414 | 0.35722222 | 520 | 520 |
| ZSWIM2    | 0.047629851 | 0.278307467 | 0.35758148 | 520 | 39  |
| NPY2R     | 0.0476294   | 0.27831203  | 0.35758148 | 520 | 104 |
| OR2K2     | 0.047616161 | 0.278445794 | 0.35773055 | 520 | 97  |
| NGRN      | 0.047602031 | 0.278588609 | 0.35789123 | 520 | 520 |
| LOC284798 | 0.047541433 | 0.279201656 | 0.35856456 | 520 | 237 |
| C7orf70   | 0.047512461 | 0.279495074 | 0.35891852 | 520 | 520 |
| MTM1      | 0.047470858 | 0.279916787 | 0.35936853 | 520 | 520 |
| NAT10     | 0.047449187 | 0.280136632 | 0.35960693 | 520 | 520 |
| POLR3GL   | 0.047449021 | 0.28013831  | 0.35960693 | 520 | 520 |
| DEFB131   | 0.047431265 | 0.280318525 | 0.35976976 | 520 | 8   |
| BNC1      | 0.047381108 | 0.280828012 | 0.36037778 | 520 | 520 |
| C2orf42   | 0.047368901 | 0.280952105 | 0.36050552 | 520 | 520 |
| MCM4      | 0.047367798 | 0.280963316 | 0.36050552 | 520 | 520 |
| PIAS2     | 0.047342832 | 0.28121724  | 0.36078542 | 520 | 520 |
| NMT2      | 0.047330178 | 0.281345991 | 0.36092764 | 520 | 520 |
| SATL1     | 0.047325736 | 0.281391203 | 0.36096267 | 520 | 518 |
| SMYD4     | 0.047297141 | 0.281682336 | 0.36131314 | 520 | 520 |
| DEXI      | 0.047282336 | 0.281833157 | 0.36148361 | 520 | 520 |
| PNPLA3    | 0.047266103 | 0.281998577 | 0.36162677 | 520 | 515 |
| PGLYRP1   | 0.047240942 | 0.282255116 | 0.36190971 | 520 | 283 |
| C20orf56  | 0.047210624 | 0.28256445  | 0.36226027 | 520 | 231 |
| STX12     | 0.047185787 | 0.282818022 | 0.36251622 | 520 | 520 |
| ARSD      | 0.047174234 | 0.282936028 | 0.36264442 | 520 | 520 |
| TAF3      | 0.047170707 | 0.282972056 | 0.3626445  | 520 | 520 |
| SP110     | 0.047134188 | 0.283345325 | 0.36309979 | 520 | 520 |
| KCNS3     | 0.04710249  | 0.283669578 | 0.36344601 | 520 | 520 |
| MAP3K13   | 0.047075474 | 0.283946136 | 0.36373101 | 520 | 517 |
| ACOT6     | 0.0470737   | 0.283964304 | 0.36373118 | 520 | 256 |
| FAM190A   | 0.047069321 | 0.28400915  | 0.36376552 | 520 | 486 |
| TRAT1     | 0.047040308 | 0.284306396 | 0.36405374 | 520 | 486 |
| SYN2      | 0.047031906 | 0.284392526 | 0.3641409  | 520 | 444 |
| DPF1      | 0.046967128 | 0.285057092 | 0.36494547 | 520 | 518 |
| LOC339290 | 0.046898627 | 0.285760996 | 0.36573054 | 520 | 520 |
| DPY19L2P1 | 0.046888056 | 0.285869721 | 0.36582974 | 520 | 407 |
| ZNF3      | 0.046869883 | 0.28605671  | 0.3660075  | 520 | 520 |
| TMEM20    | 0.046868771 | 0.286068153 | 0.3660075  | 520 | 520 |
| KRAS      | 0.046860098 | 0.286157429 | 0.36605564 | 520 | 520 |

|               |              |             |            |     |     |
|---------------|--------------|-------------|------------|-----|-----|
| PER4          | 0.046859964  | 0.286158799 | 0.36605564 | 520 | 21  |
| VWA5B1        | 0.046859825  | 0.286160236 | 0.36605564 | 520 | 194 |
| C17orf17      | 0.046799157  | 0.286785216 | 0.36671552 | 520 | 520 |
| CTAG2         | 0.046756572  | 0.287224455 | 0.36720839 | 520 | 196 |
| DKFZp686A1627 | 0.046746116  | 0.287332368 | 0.367322   | 520 | 154 |
| C2CD4C        | 0.046732729  | 0.287470578 | 0.36747539 | 520 | 520 |
| PRAME         | 0.046715677  | 0.287646688 | 0.3676772  | 520 | 483 |
| FAM27C        | 0.046695148  | 0.287858803 | 0.36790169 | 520 | 516 |
| CENPBD1       | 0.046674138  | 0.288076004 | 0.36813262 | 520 | 520 |
| PRF1          | 0.0466636397 | 0.288466436 | 0.36853812 | 520 | 520 |
| C5orf38       | 0.046588193  | 0.288965629 | 0.36910572 | 520 | 515 |
| SLC38A1       | 0.046539571  | 0.28946973  | 0.36963255 | 520 | 520 |
| LOC100272217  | 0.046495149  | 0.28993081  | 0.370151   | 520 | 520 |
| FAM168B       | 0.046479944  | 0.290088738 | 0.37032917 | 520 | 520 |
| PDS5A         | 0.046451743  | 0.290381818 | 0.37065639 | 520 | 520 |
| LOC349196     | 0.04641884   | 0.290724005 | 0.37095228 | 520 | 447 |
| PIGO          | 0.046376592  | 0.291163779 | 0.37137241 | 520 | 520 |
| UCP1          | 0.046357604  | 0.291361582 | 0.3715542  | 520 | 232 |
| STIP1         | 0.04632963   | 0.291653148 | 0.37190249 | 520 | 520 |
| PRDM1         | 0.046277834  | 0.292193532 | 0.37250779 | 520 | 520 |
| LOC401093     | 0.04627717   | 0.292200464 | 0.37250779 | 520 | 520 |
| C18orf20      | 0.046201102  | 0.292995297 | 0.37344862 | 520 | 21  |
| FBXL22        | 0.046197533  | 0.293032621 | 0.37346435 | 520 | 518 |
| ZDHHC24       | 0.046164607  | 0.293377146 | 0.3738539  | 520 | 520 |
| C1orf227      | 0.046163625  | 0.293387427 | 0.3738539  | 520 | 197 |
| ABCB9         | 0.046114441  | 0.293902579 | 0.37443935 | 520 | 520 |
| RAB39B        | 0.046078932  | 0.294274872 | 0.37482619 | 520 | 515 |
| GLIPR1L2      | 0.046057662  | 0.294498034 | 0.37505579 | 520 | 505 |
| MAGEB3        | 0.04604328   | 0.294648986 | 0.3751766  | 520 | 51  |
| NRBF2         | 0.04599765   | 0.295128267 | 0.37573976 | 520 | 520 |
| SLC9A6        | 0.045924196  | 0.295900893 | 0.37653323 | 520 | 520 |
| ANXA2P2       | 0.045886661  | 0.296296226 | 0.37698871 | 520 | 520 |
| C17orf67      | 0.045876193  | 0.296406536 | 0.37710527 | 520 | 520 |
| LOC147804     | 0.045843272  | 0.29675365  | 0.37745162 | 520 | 520 |
| SSX3          | 0.045796695  | 0.297245213 | 0.37799909 | 520 | 43  |
| C12orf4       | 0.045733755  | 0.297910331 | 0.37863624 | 520 | 520 |
| BOD1          | 0.045696129  | 0.298308416 | 0.37901742 | 520 | 520 |
| TMEM149       | 0.045695069  | 0.298319633 | 0.37901742 | 520 | 520 |
| SLC16A1       | 0.045694749  | 0.298323026 | 0.37901742 | 520 | 520 |
| ABCC1         | 0.045682934  | 0.298448103 | 0.37915055 | 520 | 520 |
| FLJ43663      | 0.045681299  | 0.298465414 | 0.37915055 | 520 | 520 |
| AP3D1         | 0.045672255  | 0.298561187 | 0.37920902 | 520 | 520 |
| TRIM71        | 0.045669546  | 0.298589876 | 0.37920902 | 520 | 142 |
| CENPV         | 0.045668591  | 0.29859999  | 0.37920902 | 520 | 519 |
| GMPPA         | 0.045668007  | 0.298606179 | 0.37920902 | 520 | 520 |
| TMC3          | 0.045666298  | 0.29862428  | 0.37920902 | 520 | 294 |

|            |             |             |            |     |     |
|------------|-------------|-------------|------------|-----|-----|
| MGC87042   | 0.045613455 | 0.299184352 | 0.37984846 | 520 | 520 |
| SMEK3P     | 0.045603277 | 0.299292303 | 0.37994675 | 520 | 114 |
| G3BP1      | 0.045588368 | 0.299450488 | 0.38009062 | 520 | 520 |
| HSPA1L     | 0.045577335 | 0.29956758  | 0.38019138 | 520 | 520 |
| FUCA1      | 0.04552895  | 0.300081448 | 0.38074769 | 520 | 520 |
| SC5DL      | 0.045497064 | 0.300420419 | 0.3811538  | 520 | 520 |
| ANKRD26P1  | 0.045486716 | 0.300530476 | 0.38123859 | 520 | 160 |
| CDHR5      | 0.04548583  | 0.300539904 | 0.38123859 | 520 | 429 |
| NPDC1      | 0.045467713 | 0.300732663 | 0.38145395 | 520 | 520 |
| C6orf201   | 0.045460327 | 0.300811267 | 0.38152965 | 520 | 487 |
| CALR3      | 0.045439069 | 0.301037586 | 0.38174466 | 520 | 258 |
| ZNF662     | 0.045392695 | 0.301531691 | 0.38229911 | 520 | 520 |
| CXorf56    | 0.045389862 | 0.301561898 | 0.38231337 | 520 | 520 |
| FAM116B    | 0.045383191 | 0.301633021 | 0.38237949 | 520 | 520 |
| UTF1       | 0.045365347 | 0.301823337 | 0.38257265 | 520 | 169 |
| MAFK       | 0.045317418 | 0.302334906 | 0.3830766  | 520 | 520 |
| ZNF679     | 0.045295077 | 0.30257355  | 0.38335489 | 520 | 57  |
| PCDHGB8P   | 0.045285726 | 0.302673483 | 0.38345741 | 520 | 419 |
| FLJ36777   | 0.045275662 | 0.302781055 | 0.38356193 | 520 | 478 |
| NCRNA00200 | 0.045193336 | 0.303661956 | 0.38463721 | 520 | 92  |
| GPC2       | 0.045180918 | 0.30379498  | 0.38475736 | 520 | 520 |
| SNCB       | 0.045102254 | 0.304638527 | 0.38572881 | 520 | 504 |
| PHF1       | 0.045085209 | 0.304821514 | 0.38593627 | 520 | 520 |
| MAF1       | 0.045055367 | 0.305142058 | 0.38626499 | 520 | 520 |
| SI         | 0.045035338 | 0.305357323 | 0.38646906 | 520 | 43  |
| GABARAP    | 0.045014874 | 0.305577366 | 0.38669901 | 520 | 520 |
| GNLY       | 0.044981528 | 0.305936149 | 0.38707283 | 520 | 520 |
| LSP1       | 0.044932614 | 0.306462936 | 0.38767369 | 520 | 520 |
| ZFAND5     | 0.044913218 | 0.30667198  | 0.38791379 | 520 | 520 |
| CD22       | 0.044857372 | 0.307274431 | 0.38862709 | 520 | 520 |
| TDGF1      | 0.044837161 | 0.30749265  | 0.38887869 | 520 | 303 |
| PSMD1      | 0.044820927 | 0.307668006 | 0.38902726 | 520 | 520 |
| C21orf56   | 0.044811228 | 0.307772806 | 0.38913537 | 520 | 520 |
| HRASLS5    | 0.044783565 | 0.308071831 | 0.38944019 | 520 | 438 |
| RBM18      | 0.044777998 | 0.308132027 | 0.3894695  | 520 | 520 |
| C14orf33   | 0.044777848 | 0.30813365  | 0.3894695  | 520 | 520 |
| CLEC2L     | 0.04474984  | 0.308436646 | 0.38982804 | 520 | 404 |
| ZNF720     | 0.044724406 | 0.308711958 | 0.3901271  | 520 | 520 |
| PATE2      | 0.044717653 | 0.308785089 | 0.3901743  | 520 | 216 |
| RFX1       | 0.044714995 | 0.308813869 | 0.39018252 | 520 | 520 |
| TSSK4      | 0.044710276 | 0.308864986 | 0.39022265 | 520 | 509 |
| CLDN18     | 0.044706448 | 0.308906444 | 0.39024837 | 520 | 461 |
| SLC35D3    | 0.044704823 | 0.308924049 | 0.39024837 | 520 | 324 |
| LOC92659   | 0.044700427 | 0.30897167  | 0.39028408 | 520 | 520 |
| GABRR1     | 0.044679542 | 0.309197998 | 0.3905455  | 520 | 466 |
| TERF2      | 0.044663858 | 0.309368028 | 0.39073579 | 520 | 520 |

|              |             |             |            |     |     |
|--------------|-------------|-------------|------------|-----|-----|
| NBPF7        | 0.044607438 | 0.309980192 | 0.39145992 | 520 | 305 |
| PIK3IP1      | 0.044602593 | 0.310032793 | 0.39150183 | 520 | 520 |
| LOC283174    | 0.044522134 | 0.310907267 | 0.39250777 | 520 | 518 |
| C7orf52      | 0.044492213 | 0.311232874 | 0.39279587 | 520 | 267 |
| ELOVL4       | 0.044487726 | 0.311281716 | 0.39283293 | 520 | 520 |
| DCX          | 0.044437901 | 0.311824485 | 0.39344448 | 520 | 368 |
| AIP          | 0.044434591 | 0.311860564 | 0.39344448 | 520 | 520 |
| GSTO1        | 0.044410154 | 0.312127012 | 0.39375182 | 520 | 520 |
| CRLF1        | 0.044339358 | 0.312899787 | 0.39455389 | 520 | 520 |
| MAGEF1       | 0.044161952 | 0.314841771 | 0.39663061 | 520 | 520 |
| LANCL2       | 0.044109578 | 0.315416589 | 0.39728029 | 520 | 520 |
| ELL          | 0.044092161 | 0.315607899 | 0.39749642 | 520 | 520 |
| FKBP5        | 0.044087867 | 0.315655074 | 0.397531   | 520 | 520 |
| CALCA        | 0.044066149 | 0.315893755 | 0.3977074  | 520 | 165 |
| ZBTB11       | 0.044010402 | 0.316506959 | 0.39840479 | 520 | 520 |
| VIP          | 0.043989671 | 0.316735193 | 0.39866719 | 520 | 371 |
| CDH18        | 0.043976775 | 0.316877223 | 0.39882107 | 520 | 313 |
| KRTAP19-1    | 0.043973818 | 0.316909792 | 0.39883716 | 520 | 177 |
| LOC100188947 | 0.043951098 | 0.317160142 | 0.39910242 | 520 | 414 |
| LRRC58       | 0.043912364 | 0.317587239 | 0.39954012 | 520 | 520 |
| GSK3A        | 0.043898196 | 0.317743547 | 0.39968702 | 520 | 520 |
| LRRTM1       | 0.043885721 | 0.317881232 | 0.3998102  | 520 | 226 |
| SDAD1        | 0.04387875  | 0.317958187 | 0.39988205 | 520 | 520 |
| GAGE12D      | 0.043850931 | 0.318265395 | 0.40024345 | 520 | 134 |
| ABCA11P      | 0.043837889 | 0.31840948  | 0.40034974 | 520 | 520 |
| TET3         | 0.043835409 | 0.318436887 | 0.40035923 | 520 | 520 |
| ASZ1         | 0.043833241 | 0.31846085  | 0.4003644  | 520 | 15  |
| BNIP3L       | 0.043795392 | 0.318879294 | 0.40084048 | 520 | 520 |
| CT47A1       | 0.043735845 | 0.319538365 | 0.40159384 | 520 | 3   |
| UBQLN2       | 0.043702144 | 0.319911758 | 0.4019629  | 520 | 520 |
| CCDC69       | 0.04364805  | 0.320511702 | 0.40264145 | 520 | 520 |
| CSN1S1       | 0.043638205 | 0.320620969 | 0.40272854 | 520 | 28  |
| PTK2B        | 0.043596785 | 0.32108094  | 0.40323095 | 520 | 520 |
| MAGEA3       | 0.043594469 | 0.321106678 | 0.40323815 | 520 | 384 |
| CCDC65       | 0.043582827 | 0.321236039 | 0.40337548 | 520 | 474 |
| STL          | 0.043578352 | 0.321285777 | 0.40341282 | 520 | 512 |
| TSPYL1       | 0.04356275  | 0.321459222 | 0.40358033 | 520 | 520 |
| ANXA2P3      | 0.043495056 | 0.322212476 | 0.40437495 | 520 | 520 |
| TUBGCP3      | 0.043470942 | 0.322481075 | 0.40466167 | 520 | 520 |
| UGT2B7       | 0.043448586 | 0.322730227 | 0.40489872 | 520 | 318 |
| RPL7L1       | 0.043444657 | 0.322774027 | 0.40492848 | 520 | 520 |
| AGBL4        | 0.043409252 | 0.323168891 | 0.40527256 | 520 | 280 |
| ZNF107       | 0.043401259 | 0.323258075 | 0.40533399 | 520 | 520 |
| WFDC10A      | 0.043344642 | 0.323890288 | 0.40602572 | 520 | 16  |
| TP53I13      | 0.043296717 | 0.324426052 | 0.40662151 | 520 | 520 |
| WBP2NL       | 0.043289002 | 0.324512358 | 0.40669341 | 520 | 385 |

|              |             |             |            |     |     |
|--------------|-------------|-------------|------------|-----|-----|
| HOXD3        | 0.04322183  | 0.325264396 | 0.40757092 | 520 | 515 |
| RAET1K       | 0.043169639 | 0.3258495   | 0.40827871 | 520 | 510 |
| SLC24A5      | 0.043128612 | 0.326309922 | 0.4088048  | 520 | 364 |
| C20orf12     | 0.043117399 | 0.326435825 | 0.40891172 | 520 | 520 |
| LOC360030    | 0.043095045 | 0.326686932 | 0.40917543 | 520 | 35  |
| HS6ST1       | 0.043080143 | 0.326854403 | 0.40935976 | 520 | 520 |
| HAUS6        | 0.043066188 | 0.327011268 | 0.4095283  | 520 | 520 |
| FGFBP2       | 0.043064559 | 0.327029591 | 0.4095283  | 520 | 504 |
| GRIN3B       | 0.043014743 | 0.327590012 | 0.41017915 | 520 | 510 |
| KCNV1        | 0.043006496 | 0.327682839 | 0.41024443 | 520 | 167 |
| OR13H1       | 0.043000596 | 0.327749266 | 0.41030212 | 520 | 55  |
| ZNF114       | 0.042932932 | 0.328511709 | 0.4110911  | 520 | 519 |
| LDHA         | 0.042932338 | 0.328518412 | 0.4110911  | 520 | 520 |
| PLEKHA2      | 0.042932001 | 0.328522213 | 0.4110911  | 520 | 520 |
| PRIM2        | 0.042850026 | 0.329447459 | 0.41209544 | 520 | 520 |
| LRWD1        | 0.042818067 | 0.329808636 | 0.41252164 | 520 | 520 |
| LOC100144604 | 0.04276212  | 0.330441526 | 0.41323635 | 520 | 231 |
| WDTC1        | 0.04275986  | 0.330467108 | 0.41324271 | 520 | 520 |
| RP1-177G6.2  | 0.042720237 | 0.330915825 | 0.41368322 | 520 | 157 |
| C9orf122     | 0.042719413 | 0.330925158 | 0.41368322 | 520 | 495 |
| CLEC4GP1     | 0.042715881 | 0.330965178 | 0.41368322 | 520 | 329 |
| IL5RA        | 0.042714944 | 0.330975799 | 0.41368322 | 520 | 367 |
| LOC84740     | 0.042714263 | 0.330983508 | 0.41368322 | 520 | 519 |
| GPR31        | 0.04269704  | 0.331178707 | 0.41390154 | 520 | 238 |
| ARIH1        | 0.042689068 | 0.331269085 | 0.41396421 | 520 | 520 |
| XCR1         | 0.042688995 | 0.331269913 | 0.41396421 | 520 | 452 |
| ALPP         | 0.042632623 | 0.331909424 | 0.41468626 | 520 | 416 |
| MCM8         | 0.042586776 | 0.332430128 | 0.41525964 | 520 | 520 |
| SQSTM1       | 0.042530039 | 0.333075234 | 0.41590248 | 520 | 520 |
| TSPAN13      | 0.042528818 | 0.333089124 | 0.41590248 | 520 | 520 |
| HLTF         | 0.042487615 | 0.333558132 | 0.4164623  | 520 | 520 |
| CD52         | 0.042480259 | 0.333641912 | 0.41654111 | 520 | 520 |
| MYO1G        | 0.042438865 | 0.334113591 | 0.41707834 | 520 | 520 |
| DCAF13       | 0.042395716 | 0.334605721 | 0.41764096 | 520 | 520 |
| NLRC3        | 0.042392825 | 0.334638721 | 0.4176563  | 520 | 519 |
| ANXA2P1      | 0.042352334 | 0.335100991 | 0.41810385 | 520 | 520 |
| JUB          | 0.042345625 | 0.335177622 | 0.41817359 | 520 | 520 |
| CPA2         | 0.042314458 | 0.33553378  | 0.41854025 | 520 | 367 |
| LOC440173    | 0.042307135 | 0.335617494 | 0.41861878 | 520 | 492 |
| ZNF202       | 0.0422511   | 0.336258537 | 0.41939241 | 520 | 520 |
| CCDC134      | 0.042240074 | 0.336384771 | 0.41951255 | 520 | 520 |
| COBL         | 0.042156916 | 0.337337779 | 0.42052626 | 520 | 519 |
| B4GALNT2     | 0.042152108 | 0.337392929 | 0.42053124 | 520 | 434 |
| BCAP29       | 0.042138424 | 0.33754993  | 0.42069082 | 520 | 520 |
| OPRK1        | 0.042103555 | 0.337950216 | 0.42111161 | 520 | 248 |
| PEX10        | 0.042081824 | 0.338199826 | 0.42139661 | 520 | 520 |

|           |             |             |            |     |     |
|-----------|-------------|-------------|------------|-----|-----|
| C11orf21  | 0.042037599 | 0.338708191 | 0.42194503 | 520 | 495 |
| HOXA13    | 0.042036252 | 0.338723678 | 0.42194503 | 520 | 446 |
| ABCD4     | 0.042020187 | 0.338908472 | 0.42212307 | 520 | 520 |
| TP53      | 0.042001012 | 0.339129125 | 0.42234573 | 520 | 520 |
| HLA-J     | 0.041969965 | 0.339486583 | 0.42276479 | 520 | 518 |
| ACVR1C    | 0.041953975 | 0.339670774 | 0.42296804 | 520 | 520 |
| DCLRE1B   | 0.041951798 | 0.339695854 | 0.42297315 | 520 | 520 |
| LOC284788 | 0.041915888 | 0.340109769 | 0.42343624 | 520 | 22  |
| AQP7P1    | 0.041891442 | 0.340391728 | 0.42373495 | 520 | 388 |
| OR52E4    | 0.04186103  | 0.340742704 | 0.42414568 | 520 | 12  |
| GRIK5     | 0.041845828 | 0.340918237 | 0.42433798 | 520 | 519 |
| GPN1      | 0.041804058 | 0.341400822 | 0.42485382 | 520 | 520 |
| ZFP64     | 0.041802663 | 0.341416943 | 0.42485382 | 520 | 520 |
| HIST1H1T  | 0.041796455 | 0.341488708 | 0.4249169  | 520 | 272 |
| CREB3L3   | 0.041763635 | 0.341868266 | 0.42531045 | 520 | 412 |
| ARID2     | 0.04175586  | 0.341958217 | 0.42536986 | 520 | 520 |
| SH2D2A    | 0.041746203 | 0.342069977 | 0.42548264 | 520 | 520 |
| VN1R5     | 0.041679878 | 0.342838121 | 0.42638549 | 520 | 119 |
| FBXW2     | 0.041655465 | 0.34312113  | 0.42671114 | 520 | 520 |
| AGPAT9    | 0.041616376 | 0.34357459  | 0.42722238 | 520 | 520 |
| LOC202181 | 0.041595501 | 0.34381691  | 0.42748816 | 520 | 518 |
| IER5L     | 0.041562113 | 0.344204714 | 0.42792617 | 520 | 520 |
| SIX6      | 0.041540706 | 0.344453503 | 0.42815685 | 520 | 170 |
| PRMT10    | 0.04152374  | 0.344650768 | 0.42837564 | 520 | 520 |
| PANX2     | 0.041487712 | 0.345069892 | 0.42881729 | 520 | 520 |
| MS4A10    | 0.041473829 | 0.345231482 | 0.42899166 | 520 | 85  |
| YAF2      | 0.041459962 | 0.34539293  | 0.42916583 | 520 | 520 |
| CCL16     | 0.041453974 | 0.345462658 | 0.42922602 | 520 | 155 |
| MESDC2    | 0.041431728 | 0.345721799 | 0.42941569 | 520 | 520 |
| SYCE1     | 0.041412071 | 0.345950887 | 0.42964731 | 520 | 376 |
| RTKN      | 0.041364339 | 0.34650757  | 0.43023268 | 520 | 520 |
| PANK4     | 0.041362327 | 0.346531044 | 0.43023533 | 520 | 520 |
| OLIG1     | 0.041320218 | 0.347022641 | 0.43081914 | 520 | 340 |
| SNORA23   | 0.041297581 | 0.347287094 | 0.43109437 | 520 | 188 |
| TCF23     | 0.041290293 | 0.347372262 | 0.4311215  | 520 | 48  |
| C17orf77  | 0.041220605 | 0.348187305 | 0.43205224 | 520 | 194 |
| EIF4E1B   | 0.041216515 | 0.34823518  | 0.43205846 | 520 | 58  |
| SSX4      | 0.041191388 | 0.348529378 | 0.43231708 | 520 | 169 |
| UBE2V1    | 0.041166639 | 0.348819307 | 0.43262348 | 520 | 520 |
| SLCO4C1   | 0.041150516 | 0.349008266 | 0.43280459 | 520 | 482 |
| CDC16     | 0.041136294 | 0.349175008 | 0.43298474 | 520 | 520 |
| PGA4      | 0.041072808 | 0.3499199   | 0.43377504 | 520 | 225 |
| GDAP2     | 0.041031359 | 0.350406786 | 0.43424513 | 520 | 520 |
| RDH11     | 0.041003657 | 0.350732414 | 0.43460526 | 520 | 520 |
| ZNF14     | 0.040996531 | 0.350816213 | 0.43467237 | 520 | 520 |
| CORO1A    | 0.040958903 | 0.351258902 | 0.43516739 | 520 | 520 |

|          |             |             |            |     |     |
|----------|-------------|-------------|------------|-----|-----|
| MBOAT4   | 0.040885621 | 0.352122073 | 0.43610279 | 520 | 463 |
| TYK2     | 0.040855635 | 0.352475662 | 0.43646028 | 520 | 520 |
| KRT86    | 0.040804015 | 0.353084866 | 0.43710727 | 520 | 519 |
| OR10G9   | 0.040801071 | 0.353119628 | 0.43711903 | 520 | 5   |
| FAM46C   | 0.040799539 | 0.353137719 | 0.43711903 | 520 | 520 |
| SF3B1    | 0.040785173 | 0.353307403 | 0.43730222 | 520 | 520 |
| GRXCR1   | 0.040735913 | 0.353889601 | 0.43788843 | 520 | 20  |
| ZNF442   | 0.040731374 | 0.353943284 | 0.43792798 | 520 | 519 |
| FAM98B   | 0.040707245 | 0.35422871  | 0.43822736 | 520 | 520 |
| RORB     | 0.040704136 | 0.354265499 | 0.43824598 | 520 | 475 |
| C11orf17 | 0.040665956 | 0.354717465 | 0.43875126 | 520 | 520 |
| GCLM     | 0.040639832 | 0.355026924 | 0.43905323 | 520 | 520 |
| IRX4     | 0.040604033 | 0.355451276 | 0.4394873  | 520 | 511 |
| ZNF2     | 0.040587882 | 0.355642819 | 0.43965311 | 520 | 520 |
| HBD      | 0.040511712 | 0.356547074 | 0.44058189 | 520 | 242 |
| NOC3L    | 0.040450982 | 0.357269061 | 0.44123068 | 520 | 520 |
| RAB13    | 0.040432425 | 0.35748986  | 0.44139523 | 520 | 520 |
| ZNF280B  | 0.040397745 | 0.357902726 | 0.44182384 | 520 | 506 |
| STK17A   | 0.040395059 | 0.357934709 | 0.44183627 | 520 | 520 |
| C8A      | 0.040382423 | 0.358085233 | 0.44199502 | 520 | 72  |
| HSF5     | 0.040378067 | 0.358137125 | 0.44203201 | 520 | 357 |
| TSR1     | 0.040352216 | 0.358445199 | 0.44230396 | 520 | 520 |
| CTPS2    | 0.040322183 | 0.358803326 | 0.44268086 | 520 | 520 |
| SCARNA8  | 0.040313037 | 0.358912429 | 0.44274503 | 520 | 8   |
| CALM1    | 0.040289314 | 0.359195521 | 0.44306714 | 520 | 520 |
| ZNF155   | 0.040255793 | 0.359595781 | 0.44352445 | 520 | 520 |
| HBG2     | 0.040188827 | 0.360396213 | 0.44443944 | 520 | 236 |
| ACAT1    | 0.040158747 | 0.360756127 | 0.44485608 | 520 | 520 |
| ZBED2    | 0.040152408 | 0.360832003 | 0.44490833 | 520 | 520 |
| CAPN7    | 0.040147939 | 0.360885496 | 0.44493397 | 520 | 520 |
| GALP     | 0.04014606  | 0.360907985 | 0.4449345  | 520 | 42  |
| TAS2R14  | 0.040133328 | 0.361060433 | 0.44509522 | 520 | 492 |
| ZNF735   | 0.04013031  | 0.361096583 | 0.44511257 | 520 | 39  |
| NANOS3   | 0.040116792 | 0.36125849  | 0.44523946 | 520 | 505 |
| MAGEA2   | 0.040116185 | 0.361265759 | 0.44523946 | 520 | 368 |
| SSX6     | 0.040111606 | 0.361320611 | 0.44527984 | 520 | 254 |
| CYorf15A | 0.040051407 | 0.36204227  | 0.44592391 | 520 | 410 |
| NMUR1    | 0.04003826  | 0.3622      | 0.44608528 | 520 | 455 |
| STRAP    | 0.040036799 | 0.362217531 | 0.44608528 | 520 | 520 |
| RSBN1L   | 0.039998829 | 0.362673307 | 0.44659203 | 520 | 520 |
| FAM138F  | 0.039907829 | 0.363767105 | 0.44777485 | 520 | 291 |
| PARP3    | 0.039793024 | 0.365149962 | 0.44933991 | 520 | 520 |
| MEGF9    | 0.039787019 | 0.365222381 | 0.4494016  | 520 | 520 |
| CDX2     | 0.03978504  | 0.365246251 | 0.44940355 | 520 | 280 |
| GSDMD    | 0.039766754 | 0.365466839 | 0.44964753 | 520 | 520 |
| HTA      | 0.039751173 | 0.365654878 | 0.44979654 | 520 | 86  |



|           |             |             |            |     |     |
|-----------|-------------|-------------|------------|-----|-----|
| SNORA64   | 0.039746945 | 0.365705909 | 0.44983188 | 520 | 34  |
| GABRA2    | 0.039719719 | 0.366034638 | 0.45015385 | 520 | 224 |
| SLC27A6   | 0.03971247  | 0.3661222   | 0.45023407 | 520 | 426 |
| ZNF502    | 0.039682782 | 0.366480929 | 0.45064773 | 520 | 520 |
| RRP12     | 0.03964966  | 0.366881394 | 0.45108515 | 520 | 520 |
| SLC3A2    | 0.039628134 | 0.367141811 | 0.45129526 | 520 | 520 |
| FHIT      | 0.039605844 | 0.367411591 | 0.45157182 | 520 | 508 |
| RBBP4     | 0.039551548 | 0.368069257 | 0.45232499 | 520 | 520 |
| ZNF680    | 0.039469701 | 0.369062023 | 0.45343448 | 520 | 520 |
| ZBTB24    | 0.03941246  | 0.369757305 | 0.45420568 | 520 | 520 |
| KIAA0319L | 0.039342388 | 0.370609554 | 0.45508623 | 520 | 520 |
| OR1L4     | 0.039323574 | 0.370838585 | 0.45533974 | 520 | 17  |
| TMTC4     | 0.039271037 | 0.371478605 | 0.45599041 | 520 | 520 |
| COX18     | 0.039186728 | 0.372507108 | 0.45716575 | 520 | 520 |
| ZNF512    | 0.039168631 | 0.372728108 | 0.45740914 | 520 | 520 |
| KIAA1539  | 0.039155742 | 0.372885558 | 0.45757451 | 520 | 520 |
| C7orf4    | 0.03913358  | 0.373156369 | 0.45779539 | 520 | 96  |
| FAM150A   | 0.039105012 | 0.373505661 | 0.45817482 | 520 | 175 |
| OSBPL11   | 0.039086137 | 0.373736539 | 0.45839559 | 520 | 520 |
| SV2C      | 0.039048045 | 0.374202758 | 0.45888368 | 520 | 392 |
| HLA-H     | 0.039030344 | 0.374419522 | 0.45910666 | 520 | 520 |
| SLCO1B1   | 0.039018944 | 0.374559172 | 0.45923697 | 520 | 299 |
| GSTCD     | 0.039006546 | 0.374711076 | 0.45939528 | 520 | 520 |
| LOC389332 | 0.038980573 | 0.375029433 | 0.45970063 | 520 | 324 |
| VIPR1     | 0.038968234 | 0.375180737 | 0.45982052 | 520 | 520 |
| TSPY2     | 0.038967091 | 0.375194752 | 0.45982052 | 520 | 41  |
| STX11     | 0.038958666 | 0.375298082 | 0.45991598 | 520 | 520 |
| ABCF2     | 0.03895067  | 0.37539617  | 0.45998349 | 520 | 520 |
| SH3TC1    | 0.038948048 | 0.375428344 | 0.45999496 | 520 | 520 |
| ALS2CR8   | 0.038925502 | 0.375705008 | 0.46025854 | 520 | 520 |
| ATMIN     | 0.038924937 | 0.375711941 | 0.46025854 | 520 | 520 |
| SMC3      | 0.038922943 | 0.375736418 | 0.46026056 | 520 | 520 |
| ST7OT2    | 0.038888631 | 0.376157742 | 0.46066473 | 520 | 64  |
| GMPR2     | 0.038885317 | 0.376198451 | 0.4606866  | 520 | 520 |
| NEURL     | 0.038882346 | 0.376234947 | 0.46068969 | 520 | 520 |
| CDC42SE1  | 0.038881392 | 0.37624667  | 0.46068969 | 520 | 520 |
| TBCB      | 0.03884287  | 0.376720096 | 0.46115736 | 520 | 520 |
| CCDC38    | 0.038795791 | 0.377299186 | 0.46173883 | 520 | 223 |
| BCL7A     | 0.038794945 | 0.377309598 | 0.46173883 | 520 | 520 |
| RASAL3    | 0.038778173 | 0.377516028 | 0.46196342 | 520 | 520 |
| EVI5L     | 0.038746494 | 0.37790614  | 0.46238467 | 520 | 520 |
| KRTAP13-2 | 0.038720033 | 0.378232182 | 0.46275552 | 520 | 124 |
| FLJ14107  | 0.038652433 | 0.379065911 | 0.46366303 | 520 | 366 |
| POU6F2    | 0.038624401 | 0.379411968 | 0.46403002 | 520 | 326 |
| MAGEB1    | 0.038612585 | 0.379557889 | 0.46415218 | 520 | 70  |
| ZFY       | 0.038593084 | 0.379798793 | 0.46439216 | 520 | 468 |

|           |             |             |            |     |     |
|-----------|-------------|-------------|------------|-----|-----|
| SNORA70   | 0.038559833 | 0.380209788 | 0.46483661 | 520 | 61  |
| CEP57     | 0.038545927 | 0.380381753 | 0.46501865 | 520 | 520 |
| ARIH2     | 0.038538388 | 0.380474995 | 0.46510444 | 520 | 520 |
| RTN4R     | 0.038505623 | 0.380880422 | 0.46557183 | 520 | 520 |
| GPA33     | 0.038503236 | 0.380909977 | 0.46557973 | 520 | 474 |
| USP50     | 0.038485728 | 0.381126722 | 0.46575995 | 520 | 105 |
| GML       | 0.038470094 | 0.381320343 | 0.46594009 | 520 | 70  |
| KIF20A    | 0.038450133 | 0.381567639 | 0.46613865 | 520 | 520 |
| FAM107A   | 0.03844935  | 0.381577342 | 0.46613865 | 520 | 520 |
| GAGE8     | 0.038447648 | 0.38159843  | 0.46613865 | 520 | 71  |
| PACRG     | 0.038421145 | 0.381926951 | 0.46648344 | 520 | 399 |
| RPL21     | 0.038417645 | 0.381970345 | 0.46650818 | 520 | 490 |
| SYNPR     | 0.038399161 | 0.382199579 | 0.4667019  | 520 | 108 |
| FAM197Y2  | 0.038395524 | 0.382244686 | 0.4667019  | 520 | 16  |
| FAM60A    | 0.038352539 | 0.382778141 | 0.46726618 | 520 | 520 |
| LOC678655 | 0.038346761 | 0.382849885 | 0.46727072 | 520 | 520 |
| FMO3      | 0.038314097 | 0.383255594 | 0.467653   | 520 | 519 |
| NFXL1     | 0.038292313 | 0.383526312 | 0.4679267  | 520 | 520 |
| SRRM4     | 0.038289187 | 0.383565177 | 0.46793536 | 520 | 321 |
| CCKBR     | 0.038288009 | 0.383579821 | 0.46793536 | 520 | 230 |
| BASE      | 0.038284708 | 0.383620851 | 0.46795374 | 520 | 8   |
| VANGL2    | 0.038282458 | 0.383648832 | 0.46795374 | 520 | 520 |
| NIPAL4    | 0.038281197 | 0.38366451  | 0.46795374 | 520 | 519 |
| TXNIP     | 0.038247123 | 0.384088282 | 0.46838561 | 520 | 520 |
| CLDN6     | 0.038241343 | 0.384160201 | 0.46840013 | 520 | 410 |
| ZDHC19    | 0.038240566 | 0.384169873 | 0.46840013 | 520 | 413 |
| LSM14B    | 0.038233727 | 0.384254971 | 0.46847556 | 520 | 520 |
| BRPF1     | 0.038230211 | 0.384298724 | 0.46850057 | 520 | 520 |
| CACNA1I   | 0.038182741 | 0.384889795 | 0.4691077  | 520 | 502 |
| SMEK2     | 0.038163296 | 0.385132067 | 0.46936944 | 520 | 520 |
| CDKN1C    | 0.038147247 | 0.385332099 | 0.46953326 | 520 | 520 |
| HMHB1     | 0.038125644 | 0.385601459 | 0.4698047  | 520 | 138 |
| LCE1A     | 0.038109961 | 0.385797075 | 0.47001464 | 520 | 233 |
| PTCHD1    | 0.038100939 | 0.385909636 | 0.47009496 | 520 | 383 |
| AMAC1L2   | 0.038095463 | 0.38597797  | 0.4701498  | 520 | 402 |
| SLA2      | 0.038068223 | 0.38631798  | 0.47047869 | 520 | 520 |
| SUPT5H    | 0.038063384 | 0.386378391 | 0.47052385 | 520 | 520 |
| AHSP      | 0.038056028 | 0.386470254 | 0.47054386 | 520 | 219 |
| ZNF259    | 0.038041456 | 0.386652254 | 0.47071521 | 520 | 520 |
| HPCAL1    | 0.038036381 | 0.386715652 | 0.47075793 | 520 | 520 |
| TJP1      | 0.038033041 | 0.38675738  | 0.47075793 | 520 | 520 |
| VPS36     | 0.038004045 | 0.387119762 | 0.47111137 | 520 | 520 |
| TFRC      | 0.03800069  | 0.38716171  | 0.47113631 | 520 | 520 |
| RS1       | 0.03796441  | 0.387615436 | 0.47163153 | 520 | 365 |
| GOLGA6A   | 0.037954209 | 0.38774307  | 0.47175836 | 520 | 131 |
| HK1       | 0.037916214 | 0.388218691 | 0.47219458 | 520 | 520 |

|           |             |             |            |     |     |
|-----------|-------------|-------------|------------|-----|-----|
| GUSBL2    | 0.037904451 | 0.388366013 | 0.47231678 | 520 | 520 |
| OR52N1    | 0.03788992  | 0.388548048 | 0.47248118 | 520 | 13  |
| ZNF250    | 0.037885587 | 0.388602328 | 0.47251868 | 520 | 520 |
| ZNF673    | 0.037865901 | 0.388849044 | 0.47276166 | 520 | 520 |
| MKRN3     | 0.037855735 | 0.388976495 | 0.47285959 | 520 | 502 |
| CD5L      | 0.037850152 | 0.38904649  | 0.47288766 | 520 | 286 |
| KHDC1     | 0.037830882 | 0.389288156 | 0.47312437 | 520 | 519 |
| SQLE      | 0.037826643 | 0.389341342 | 0.47316049 | 520 | 520 |
| ASAP3     | 0.037798232 | 0.389697832 | 0.47350811 | 520 | 520 |
| YARS2     | 0.037791094 | 0.389787432 | 0.47352771 | 520 | 520 |
| IL12B     | 0.037783924 | 0.389877449 | 0.47358367 | 520 | 454 |
| ESR1      | 0.037689127 | 0.391068738 | 0.47480191 | 520 | 520 |
| IL28RA    | 0.037677658 | 0.391213008 | 0.47492675 | 520 | 520 |
| PCSK7     | 0.03767593  | 0.391234757 | 0.47492675 | 520 | 520 |
| NODAL     | 0.037655366 | 0.39149353  | 0.4752032  | 520 | 504 |
| CXCL11    | 0.037630187 | 0.39181052  | 0.47542179 | 520 | 517 |
| LIPT2     | 0.037616948 | 0.391977255 | 0.47558995 | 520 | 520 |
| OR2L8     | 0.037605446 | 0.392122154 | 0.47570851 | 520 | 21  |
| PYGL      | 0.037594721 | 0.392257285 | 0.47584009 | 520 | 520 |
| LOC550643 | 0.037579069 | 0.392454564 | 0.47602586 | 520 | 520 |
| KIAA0415  | 0.037571925 | 0.392544619 | 0.47610645 | 520 | 520 |
| CHRNB4    | 0.037561923 | 0.392670724 | 0.47623075 | 520 | 493 |
| SERPINA7  | 0.037538569 | 0.39296527  | 0.476502   | 520 | 44  |
| KCTD18    | 0.037534682 | 0.393014303 | 0.4765328  | 520 | 520 |
| ADAMTS13  | 0.037464226 | 0.393903788 | 0.47747544 | 520 | 519 |
| TBK1      | 0.037463724 | 0.393910135 | 0.47747544 | 520 | 520 |
| RASGEF1A  | 0.037440415 | 0.394204674 | 0.47776297 | 520 | 520 |
| KIF14     | 0.037439327 | 0.394218423 | 0.47776297 | 520 | 520 |
| CUL4A     | 0.037402974 | 0.394678074 | 0.4782338  | 520 | 520 |
| OR2M1P    | 0.037397889 | 0.394742384 | 0.47828299 | 520 | 9   |
| IFT27     | 0.037374297 | 0.395040888 | 0.4786159  | 520 | 520 |
| TAX1BP3   | 0.03736577  | 0.395148806 | 0.47871789 | 520 | 520 |
| DLAT      | 0.03731592  | 0.395780085 | 0.47939627 | 520 | 520 |
| LOC151174 | 0.037257873 | 0.396515918 | 0.48017218 | 520 | 473 |
| MBNL3     | 0.037245942 | 0.396667274 | 0.48028512 | 520 | 520 |
| CXorf48   | 0.037183597 | 0.397458694 | 0.48109153 | 520 | 232 |
| OR2T1     | 0.037084789 | 0.398714938 | 0.48242952 | 520 | 7   |
| HBM       | 0.037068303 | 0.39892477  | 0.48264422 | 520 | 77  |
| HDC       | 0.037059909 | 0.399031636 | 0.48269724 | 520 | 518 |
| TAS2R46   | 0.037058746 | 0.39904644  | 0.48269724 | 520 | 155 |
| PTGS1     | 0.037047626 | 0.399188042 | 0.48282813 | 520 | 520 |
| PGRMC1    | 0.037037822 | 0.399312904 | 0.48292121 | 520 | 520 |
| AP3S2     | 0.036990551 | 0.399915291 | 0.48356272 | 520 | 520 |
| USP37     | 0.036986964 | 0.399961019 | 0.48358901 | 520 | 520 |
| MAGI1     | 0.036968151 | 0.400200934 | 0.48382107 | 520 | 520 |
| ZNF397OS  | 0.036944039 | 0.400508531 | 0.48413488 | 520 | 520 |

|              |             |             |            |     |     |
|--------------|-------------|-------------|------------|-----|-----|
| NAP1L1       | 0.036833381 | 0.401922051 | 0.48566886 | 520 | 520 |
| PGPEP1L      | 0.036790734 | 0.402467613 | 0.48626982 | 520 | 323 |
| CPEB2        | 0.036786293 | 0.402524444 | 0.48630934 | 520 | 520 |
| SLMAP        | 0.036768413 | 0.402753335 | 0.48649843 | 520 | 520 |
| OTUD6B       | 0.036737712 | 0.403146511 | 0.48691502 | 520 | 520 |
| C2orf14      | 0.036671261 | 0.403998321 | 0.48779773 | 520 | 60  |
| STK35        | 0.036560005 | 0.405426867 | 0.48934909 | 520 | 520 |
| B3GALNT2     | 0.036559856 | 0.40542878  | 0.48934909 | 520 | 520 |
| IL5          | 0.036543226 | 0.405642579 | 0.48951924 | 520 | 95  |
| SPERT        | 0.036526104 | 0.405862757 | 0.48972633 | 520 | 491 |
| C7orf26      | 0.03651893  | 0.40595504  | 0.48980155 | 520 | 520 |
| GOLGA2P3     | 0.03651748  | 0.405973683 | 0.48980155 | 520 | 10  |
| INO80        | 0.036446516 | 0.406887181 | 0.49078621 | 520 | 520 |
| CEP250       | 0.036427494 | 0.407132258 | 0.4909542  | 520 | 520 |
| S100B        | 0.036411454 | 0.407338972 | 0.49112551 | 520 | 520 |
| PAK7         | 0.036390283 | 0.407611922 | 0.49142522 | 520 | 328 |
| EFCAB5       | 0.036374367 | 0.407817184 | 0.49164329 | 520 | 433 |
| VAX2         | 0.036293006 | 0.408867433 | 0.49276211 | 520 | 506 |
| DLL3         | 0.036263076 | 0.409254191 | 0.49316928 | 520 | 496 |
| USP26        | 0.036195081 | 0.410133637 | 0.49409914 | 520 | 94  |
| THOC2        | 0.036193944 | 0.410148355 | 0.49409914 | 520 | 520 |
| ZNF579       | 0.03618193  | 0.41030386  | 0.49422742 | 520 | 520 |
| CABC1        | 0.036169277 | 0.410467675 | 0.4943373  | 520 | 520 |
| TYW1         | 0.036169203 | 0.410468632 | 0.4943373  | 520 | 520 |
| SLAMF9       | 0.036123042 | 0.41106661  | 0.49499834 | 520 | 516 |
| CCDC132      | 0.036115488 | 0.411164514 | 0.49508666 | 520 | 520 |
| B3GAT1       | 0.036086888 | 0.411535307 | 0.49547396 | 520 | 496 |
| PAR1         | 0.036082381 | 0.411593763 | 0.49551475 | 520 | 93  |
| SUV420H1     | 0.036065975 | 0.411806561 | 0.49574134 | 520 | 520 |
| EOMES        | 0.036010777 | 0.412523035 | 0.49651492 | 520 | 517 |
| C8orf79      | 0.035983023 | 0.412883566 | 0.49688954 | 520 | 514 |
| ZNF384       | 0.035923163 | 0.413661786 | 0.4976182  | 520 | 520 |
| DSPP         | 0.035896197 | 0.414012648 | 0.49798085 | 520 | 233 |
| LOC285370    | 0.035822961 | 0.414966411 | 0.49897923 | 520 | 81  |
| LOC100129055 | 0.035809501 | 0.415141855 | 0.49913066 | 520 | 119 |
| GRIN2B       | 0.035739467 | 0.41605535  | 0.50013951 | 520 | 158 |
| C11orf42     | 0.035715674 | 0.416365971 | 0.50048307 | 520 | 254 |
| FLJ37543     | 0.035666317 | 0.417010769 | 0.50113863 | 520 | 173 |
| KRTAP19-8    | 0.035624859 | 0.417552821 | 0.50170034 | 520 | 7   |
| NDRG1        | 0.035553693 | 0.418484273 | 0.50275959 | 520 | 520 |
| RPS27L       | 0.035535735 | 0.418719501 | 0.50301221 | 520 | 520 |
| RALYL        | 0.03552988  | 0.418796218 | 0.50307056 | 520 | 131 |
| LHPP         | 0.03552822  | 0.418817966 | 0.50307056 | 520 | 520 |
| ARFIP1       | 0.035524396 | 0.418868072 | 0.50310077 | 520 | 520 |
| XRN1         | 0.035521964 | 0.418899947 | 0.50310909 | 520 | 520 |
| C11orf59     | 0.035514573 | 0.418996803 | 0.50317511 | 520 | 520 |

|            |             |             |            |     |     |
|------------|-------------|-------------|------------|-----|-----|
| TRIM22     | 0.035513962 | 0.419004823 | 0.50317511 | 520 | 520 |
| BAAT       | 0.035478744 | 0.419466557 | 0.50355886 | 520 | 428 |
| LOC283070  | 0.035400835 | 0.420489059 | 0.50456448 | 520 | 520 |
| TBC1D23    | 0.035354325 | 0.421100167 | 0.50520996 | 520 | 520 |
| DNAJB7     | 0.035340301 | 0.421284533 | 0.50537977 | 520 | 467 |
| ATP4B      | 0.035339745 | 0.421291833 | 0.50537977 | 520 | 156 |
| ZNF214     | 0.035337523 | 0.42132106  | 0.50538476 | 520 | 499 |
| GNB1L      | 0.035288554 | 0.421965231 | 0.50609725 | 520 | 520 |
| NIPAL2     | 0.035255053 | 0.422406259 | 0.50659607 | 520 | 520 |
| BOLL       | 0.035243406 | 0.42255965  | 0.50668963 | 520 | 300 |
| C7orf16    | 0.035212483 | 0.42296707  | 0.507148   | 520 | 101 |
| CLCA1      | 0.035162252 | 0.423629366 | 0.50786791 | 520 | 111 |
| C7orf29    | 0.035148717 | 0.423807923 | 0.50803537 | 520 | 520 |
| PFKP       | 0.03512562  | 0.424112726 | 0.50835427 | 520 | 520 |
| NCRNA00092 | 0.035096065 | 0.424502948 | 0.50874755 | 520 | 449 |
| USP5       | 0.035072108 | 0.424819421 | 0.50903606 | 520 | 520 |
| FYTTD1     | 0.035070117 | 0.424845724 | 0.50903733 | 520 | 520 |
| LECT1      | 0.035066529 | 0.424893136 | 0.50906389 | 520 | 152 |
| C4orf52    | 0.034964793 | 0.426238696 | 0.51052433 | 520 | 520 |
| CSNK1D     | 0.034903712 | 0.427047745 | 0.51131113 | 520 | 520 |
| TMEM88     | 0.034889593 | 0.427234884 | 0.51147445 | 520 | 520 |
| NEURL2     | 0.034880426 | 0.427356413 | 0.51158957 | 520 | 520 |
| CAMK2G     | 0.034864928 | 0.427561913 | 0.51180519 | 520 | 520 |
| OR10A6     | 0.034855733 | 0.42768387  | 0.51187489 | 520 | 136 |
| ZW10       | 0.034854797 | 0.427696295 | 0.51187489 | 520 | 520 |
| MOG        | 0.034834635 | 0.42796377  | 0.51213421 | 520 | 128 |
| CFP        | 0.034815823 | 0.428213438 | 0.51237217 | 520 | 520 |
| SKIV2L     | 0.034779023 | 0.428702074 | 0.5128154  | 520 | 520 |
| FBXO3      | 0.034751739 | 0.429064575 | 0.51317742 | 520 | 520 |
| GAL3ST3    | 0.034714108 | 0.429564817 | 0.51371478 | 520 | 148 |
| HOXB3      | 0.034709347 | 0.429628127 | 0.51376003 | 520 | 520 |
| TMEFF2     | 0.034686953 | 0.429926014 | 0.51408576 | 520 | 221 |
| BBC3       | 0.0346804   | 0.43001321  | 0.51415953 | 520 | 520 |
| VPS8       | 0.034638553 | 0.430570237 | 0.51479503 | 520 | 520 |
| MGA        | 0.034635871 | 0.430605948 | 0.51479851 | 520 | 520 |
| CYP7A1     | 0.034629358 | 0.43069268  | 0.51484985 | 520 | 211 |
| RNF103     | 0.03462634  | 0.430732882 | 0.51486738 | 520 | 520 |
| ZNF280A    | 0.034609311 | 0.430959722 | 0.51501874 | 520 | 263 |
| RBM45      | 0.034607248 | 0.430987216 | 0.51501874 | 520 | 520 |
| TAS2R8     | 0.034592673 | 0.431181426 | 0.51515923 | 520 | 28  |
| ATP13A1    | 0.034588041 | 0.431243156 | 0.51517193 | 520 | 520 |
| RHOXF2B    | 0.034583557 | 0.431302921 | 0.5152128  | 520 | 142 |
| ADORA2B    | 0.034567311 | 0.4315195   | 0.51541045 | 520 | 520 |
| RAG2       | 0.034550971 | 0.4317374   | 0.51564017 | 520 | 68  |
| VN1R2      | 0.03454028  | 0.431879989 | 0.51577992 | 520 | 21  |
| AKAP3      | 0.034519636 | 0.432155422 | 0.51604773 | 520 | 519 |

|           |             |             |            |     |     |
|-----------|-------------|-------------|------------|-----|-----|
| TEF       | 0.034507198 | 0.432321422 | 0.51621538 | 520 | 520 |
| SCIN      | 0.03445899  | 0.432965152 | 0.5168922  | 520 | 519 |
| TBC1D21   | 0.034410657 | 0.433611094 | 0.51757143 | 520 | 8   |
| PAGE1     | 0.034367566 | 0.434187462 | 0.51822872 | 520 | 78  |
| DEFB119   | 0.034358457 | 0.434309354 | 0.51834352 | 520 | 25  |
| TMEM22    | 0.034354612 | 0.434360805 | 0.51837425 | 520 | 520 |
| UCA1      | 0.034334653 | 0.434627985 | 0.51864759 | 520 | 511 |
| 11-Mar    | 0.034333659 | 0.434641292 | 0.51864759 | 520 | 88  |
| SCARNA3   | 0.034307331 | 0.434993861 | 0.51903759 | 520 | 8   |
| DNAH12    | 0.034294349 | 0.435167775 | 0.51921438 | 520 | 337 |
| C2orf72   | 0.03428468  | 0.43529733  | 0.51933823 | 520 | 492 |
| PGC       | 0.034240157 | 0.435894185 | 0.51998878 | 520 | 198 |
| PVRL2     | 0.034223561 | 0.436116791 | 0.52022356 | 520 | 520 |
| SAMD13    | 0.034217266 | 0.436201238 | 0.52026273 | 520 | 514 |
| CCNDBP1   | 0.034181373 | 0.436682936 | 0.52074485 | 520 | 520 |
| SNORA47   | 0.03416675  | 0.43687927  | 0.52091737 | 520 | 6   |
| STIM1     | 0.034117142 | 0.437545713 | 0.52155373 | 520 | 520 |
| HOXD1     | 0.034099091 | 0.43778836  | 0.52178535 | 520 | 518 |
| PZP       | 0.034056727 | 0.438358112 | 0.52243353 | 520 | 363 |
| USP33     | 0.034030788 | 0.438707184 | 0.52278776 | 520 | 520 |
| DEPDC6    | 0.034021858 | 0.438827394 | 0.5229001  | 520 | 520 |
| GLCCI1    | 0.033952999 | 0.439754975 | 0.52394347 | 520 | 520 |
| PLAA      | 0.03390495  | 0.440402892 | 0.52466799 | 520 | 520 |
| COMT      | 0.033902115 | 0.440441138 | 0.52466799 | 520 | 520 |
| PTPRS     | 0.033867149 | 0.440913007 | 0.52519907 | 520 | 520 |
| OR4F21    | 0.033844248 | 0.441222209 | 0.52550529 | 520 | 13  |
| CTNNA1    | 0.033808593 | 0.441703857 | 0.52604787 | 520 | 520 |
| APPL1     | 0.033779034 | 0.442103392 | 0.52648054 | 520 | 520 |
| GYS1      | 0.033756294 | 0.442410889 | 0.52673313 | 520 | 520 |
| C16orf78  | 0.03375444  | 0.442435973 | 0.52673313 | 520 | 14  |
| TAL2      | 0.033692806 | 0.443270057 | 0.52763267 | 520 | 388 |
| POTEH     | 0.03366076  | 0.443704082 | 0.52807798 | 520 | 55  |
| MTAP      | 0.033659383 | 0.443722738 | 0.52807798 | 520 | 520 |
| PCDHA1    | 0.033605628 | 0.444451357 | 0.52869549 | 520 | 334 |
| TRH       | 0.033575703 | 0.444857279 | 0.52911592 | 520 | 244 |
| SELP      | 0.033568054 | 0.444961056 | 0.52920814 | 520 | 519 |
| KCNK16    | 0.033545835 | 0.445262625 | 0.52953557 | 520 | 25  |
| PYY       | 0.033533801 | 0.445425998 | 0.52960492 | 520 | 222 |
| KCTD4     | 0.033507798 | 0.445779134 | 0.52996229 | 520 | 328 |
| ACTR8     | 0.033480239 | 0.446153586 | 0.53034492 | 520 | 520 |
| NKX2-1    | 0.03347622  | 0.446208198 | 0.53037857 | 520 | 325 |
| HEPHL1    | 0.033470614 | 0.446284402 | 0.53043788 | 520 | 520 |
| ERO1LB    | 0.033435301 | 0.446764531 | 0.53094595 | 520 | 520 |
| GAGE2A    | 0.033362821 | 0.44775094  | 0.53199281 | 520 | 116 |
| GARS      | 0.033338529 | 0.448081813 | 0.5323232  | 520 | 520 |
| LOC643955 | 0.033318286 | 0.448357647 | 0.53255676 | 520 | 35  |

|          |             |             |            |     |     |
|----------|-------------|-------------|------------|-----|-----|
| TYR      | 0.033293251 | 0.448698901 | 0.53286793 | 520 | 109 |
| WSCD2    | 0.033290156 | 0.448741104 | 0.53288667 | 520 | 477 |
| MT1B     | 0.033271604 | 0.448994092 | 0.5331557  | 520 | 74  |
| DNAH6    | 0.033225906 | 0.449617628 | 0.5338018  | 520 | 484 |
| RBM1B    | 0.033192819 | 0.450069387 | 0.53427523 | 520 | 4   |
| SNORA50  | 0.033175511 | 0.450305807 | 0.53452442 | 520 | 8   |
| KDM6A    | 0.03312113  | 0.45104909  | 0.53534368 | 520 | 520 |
| WDR43    | 0.033079945 | 0.451612468 | 0.535933   | 520 | 520 |
| JAKMIP1  | 0.033079004 | 0.451625346 | 0.535933   | 520 | 511 |
| TP53TG3B | 0.03304542  | 0.45208506  | 0.53641539 | 520 | 350 |
| KLF11    | 0.033039448 | 0.45216683  | 0.53648056 | 520 | 520 |
| FGF4     | 0.033005275 | 0.452634921 | 0.53690979 | 520 | 37  |
| NAGS     | 0.033003335 | 0.452661499 | 0.53690979 | 520 | 520 |
| IFNA5    | 0.032974506 | 0.453056611 | 0.53728363 | 520 | 25  |
| OR6M1    | 0.032971346 | 0.453099938 | 0.53730341 | 520 | 30  |
| ATP6V1B1 | 0.032925625 | 0.45372699  | 0.53788882 | 520 | 512 |
| CSNK1G1  | 0.03291632  | 0.45385466  | 0.53800855 | 520 | 520 |
| POU3F3   | 0.032908596 | 0.453960662 | 0.53807094 | 520 | 248 |
| FAM57A   | 0.03288338  | 0.454306798 | 0.53841791 | 520 | 520 |
| TRAF3IP1 | 0.032874751 | 0.45442529  | 0.53849504 | 520 | 520 |
| MRPL19   | 0.032857182 | 0.454666576 | 0.53871764 | 520 | 520 |
| CACNA2D3 | 0.032841357 | 0.454883986 | 0.53888025 | 520 | 518 |
| PROX2    | 0.032837874 | 0.454931838 | 0.53890527 | 520 | 416 |
| ZFATAS   | 0.032815406 | 0.45524063  | 0.53916798 | 520 | 136 |
| FCRLA    | 0.03278282  | 0.455688664 | 0.53964329 | 520 | 515 |
| APEX1    | 0.032754729 | 0.456075111 | 0.5400375  | 520 | 520 |
| DEM1     | 0.032752097 | 0.456111328 | 0.54004867 | 520 | 520 |
| LRRC50   | 0.032700554 | 0.456820901 | 0.54076181 | 520 | 475 |
| INPP5K   | 0.032697752 | 0.456859492 | 0.54077574 | 520 | 520 |
| ENPP3    | 0.032690916 | 0.456953648 | 0.54085545 | 520 | 468 |
| GUCY2D   | 0.032656578 | 0.457426786 | 0.5412566  | 520 | 507 |
| DEFB125  | 0.032626821 | 0.457837018 | 0.54171022 | 520 | 19  |
| FAM27A   | 0.032597366 | 0.458243303 | 0.54215912 | 520 | 517 |
| SRM      | 0.032594467 | 0.458283294 | 0.54217463 | 520 | 520 |
| PIK3R2   | 0.032585073 | 0.458412918 | 0.54229616 | 520 | 520 |
| MDK      | 0.032575375 | 0.458546752 | 0.54239084 | 520 | 520 |
| C4orf11  | 0.032563902 | 0.458705117 | 0.54251348 | 520 | 15  |
| MYL12A   | 0.032531725 | 0.459149421 | 0.54294446 | 520 | 520 |
| C6orf154 | 0.032519798 | 0.459314174 | 0.5430119  | 520 | 518 |
| JAG2     | 0.032498995 | 0.459601604 | 0.54322788 | 520 | 520 |
| PRKACG   | 0.032451709 | 0.460255329 | 0.54389092 | 520 | 115 |
| ALG10    | 0.032450396 | 0.46027349  | 0.54389092 | 520 | 520 |
| TMPRSS9  | 0.032444535 | 0.460354552 | 0.54395483 | 520 | 430 |
| KIAA0087 | 0.03243178  | 0.460531003 | 0.54413144 | 520 | 159 |
| C1orf114 | 0.032395558 | 0.461032278 | 0.54457228 | 520 | 471 |
| ZNF558   | 0.032395062 | 0.461039144 | 0.54457228 | 520 | 520 |

|           |             |             |            |     |     |
|-----------|-------------|-------------|------------|-----|-----|
| SNORD17   | 0.032367057 | 0.461426925 | 0.54487073 | 520 | 503 |
| PTPN20B   | 0.032354546 | 0.461600219 | 0.54501265 | 520 | 463 |
| PF4V1     | 0.032289755 | 0.46249826  | 0.54603987 | 520 | 380 |
| GFAP      | 0.03228343  | 0.462585975 | 0.5460638  | 520 | 474 |
| KIAA2013  | 0.032261524 | 0.462889854 | 0.54637423 | 520 | 520 |
| SBDS      | 0.032236229 | 0.463240878 | 0.54666056 | 520 | 520 |
| ZNF433    | 0.032224566 | 0.463402774 | 0.54681961 | 520 | 517 |
| LINGO2    | 0.032173047 | 0.464118325 | 0.54750377 | 520 | 358 |
| FAM154A   | 0.032111346 | 0.464976081 | 0.54841126 | 520 | 177 |
| OR4N3P    | 0.032109886 | 0.464996394 | 0.54841126 | 520 | 34  |
| SOX30     | 0.032043289 | 0.465923229 | 0.54947222 | 520 | 481 |
| PDCD6IP   | 0.031941734 | 0.467338544 | 0.55088357 | 520 | 520 |
| SIRPG     | 0.031926612 | 0.467549498 | 0.55106781 | 520 | 520 |
| SOD2      | 0.031895891 | 0.467978211 | 0.55154086 | 520 | 520 |
| PRG3      | 0.031889964 | 0.468060953 | 0.55160614 | 520 | 12  |
| SLC9A10   | 0.031884598 | 0.468135871 | 0.55166219 | 520 | 361 |
| KRTAP19-3 | 0.031880724 | 0.468189955 | 0.55169368 | 520 | 48  |
| ANKRD30A  | 0.031834422 | 0.468836675 | 0.55242346 | 520 | 35  |
| OR52I2    | 0.031821321 | 0.469019755 | 0.55259114 | 520 | 25  |
| RAB22A    | 0.0317823   | 0.469565279 | 0.55308805 | 520 | 520 |
| CALM2     | 0.031768989 | 0.469751454 | 0.55327502 | 520 | 520 |
| FLJ25758  | 0.031763605 | 0.469826773 | 0.55333141 | 520 | 118 |
| FAM75A6   | 0.031731328 | 0.470278417 | 0.55382763 | 520 | 85  |
| AKT2      | 0.031729568 | 0.470303045 | 0.55382763 | 520 | 520 |
| GABBR1    | 0.031723873 | 0.470382771 | 0.55388917 | 520 | 520 |
| ANKRD13C  | 0.031695256 | 0.47078345  | 0.55423152 | 520 | 520 |
| MSL3L2    | 0.031692612 | 0.470820482 | 0.55424276 | 520 | 520 |
| KRTAP3-1  | 0.031673477 | 0.471088509 | 0.55449353 | 520 | 212 |
| PHF15     | 0.031670855 | 0.471125251 | 0.55450441 | 520 | 520 |
| LOC340017 | 0.031667735 | 0.471168958 | 0.55452349 | 520 | 76  |
| RPS2P32   | 0.031655062 | 0.471346536 | 0.5547001  | 520 | 517 |
| AFARP1    | 0.031602508 | 0.472083348 | 0.55546996 | 520 | 515 |
| LRRC57    | 0.03158395  | 0.472343688 | 0.55574385 | 520 | 520 |
| KRTAP7-1  | 0.031570221 | 0.472536325 | 0.55589313 | 520 | 51  |
| USP17L6P  | 0.031554142 | 0.472762002 | 0.55604136 | 520 | 14  |
| SBDSP1    | 0.031544503 | 0.472897312 | 0.55613562 | 520 | 520 |
| RTN4RL1   | 0.031531366 | 0.473081772 | 0.55632011 | 520 | 519 |
| C7orf25   | 0.031422021 | 0.474618591 | 0.55799716 | 520 | 520 |
| GJA8      | 0.031389476 | 0.475076539 | 0.55850299 | 520 | 28  |
| SETD1B    | 0.031341403 | 0.475753413 | 0.55913574 | 520 | 520 |
| TAAR5     | 0.031337722 | 0.475805266 | 0.55916409 | 520 | 38  |
| CCDC104   | 0.031329301 | 0.475923899 | 0.55925395 | 520 | 520 |
| LIPK      | 0.031328356 | 0.475937206 | 0.55925395 | 520 | 457 |
| OR2S2     | 0.031312402 | 0.476162007 | 0.5594855  | 520 | 38  |
| ZNF37A    | 0.031294882 | 0.476408936 | 0.5596778  | 520 | 520 |
| CHKA      | 0.031270173 | 0.476757316 | 0.56005444 | 520 | 520 |



|              |             |             |            |     |     |
|--------------|-------------|-------------|------------|-----|-----|
| ZNF525       | 0.031259533 | 0.476907375 | 0.56019808 | 520 | 520 |
| TFCP2L1      | 0.031243288 | 0.477136533 | 0.56043462 | 520 | 520 |
| RHBDF1       | 0.031195001 | 0.477818034 | 0.56113703 | 520 | 520 |
| PMFBP1       | 0.031175424 | 0.47809448  | 0.56138302 | 520 | 519 |
| DCAF8L1      | 0.031174253 | 0.478111021 | 0.56138302 | 520 | 65  |
| ATXN7L3      | 0.031170112 | 0.478169513 | 0.56141901 | 520 | 520 |
| TLR3         | 0.031166404 | 0.478221878 | 0.5614478  | 520 | 519 |
| EPR1         | 0.031125255 | 0.478803327 | 0.56199955 | 520 | 518 |
| SUCLG2       | 0.031121183 | 0.478860886 | 0.5620344  | 520 | 520 |
| GBP7         | 0.031049536 | 0.479874255 | 0.56299438 | 520 | 321 |
| CENPB        | 0.031029876 | 0.480152536 | 0.56328809 | 520 | 520 |
| ATG12        | 0.031014364 | 0.480372155 | 0.56344917 | 520 | 520 |
| LOC100132247 | 0.031005912 | 0.480491843 | 0.56352222 | 520 | 519 |
| RNF44        | 0.030965055 | 0.481070646 | 0.56407742 | 520 | 520 |
| FAM200A      | 0.030964597 | 0.48107714  | 0.56407742 | 520 | 520 |
| RGS6         | 0.030938769 | 0.481443237 | 0.56447386 | 520 | 506 |
| CDH17        | 0.030922238 | 0.481677636 | 0.56468301 | 520 | 499 |
| SLC30A10     | 0.030913151 | 0.481806503 | 0.56476842 | 520 | 357 |
| SFRS14       | 0.030885927 | 0.482192703 | 0.56507842 | 520 | 520 |
| HIST1H2AK    | 0.030835102 | 0.482914167 | 0.56583655 | 520 | 448 |
| C20orf118    | 0.030763279 | 0.483934688 | 0.56693348 | 520 | 518 |
| TMEM74       | 0.030667628 | 0.485295572 | 0.56832965 | 520 | 490 |
| MTMR9L       | 0.03065177  | 0.485521395 | 0.56849506 | 520 | 520 |
| EVX1         | 0.030626768 | 0.485877549 | 0.56877997 | 520 | 59  |
| CHAD         | 0.030615212 | 0.486042217 | 0.56890667 | 520 | 489 |
| PTCHD3       | 0.030599266 | 0.486269477 | 0.56907358 | 520 | 168 |
| THRSP        | 0.030498566 | 0.487705979 | 0.57055754 | 520 | 268 |
| C21orf90     | 0.030498475 | 0.487707286 | 0.57055754 | 520 | 317 |
| LOC731789    | 0.030482608 | 0.487933837 | 0.57073347 | 520 | 259 |
| DMRT2        | 0.030479658 | 0.487975963 | 0.5707394  | 520 | 500 |
| CALCB        | 0.030473275 | 0.488067122 | 0.57077981 | 520 | 227 |
| GABRB1       | 0.030409317 | 0.488981051 | 0.5717427  | 520 | 195 |
| RAB17        | 0.030387016 | 0.489299929 | 0.57205565 | 520 | 518 |
| C12orf49     | 0.030340729 | 0.489962155 | 0.57273025 | 520 | 520 |
| OR4M2        | 0.030337368 | 0.490010265 | 0.57275329 | 520 | 20  |
| SEC24C       | 0.030324817 | 0.490189924 | 0.57293007 | 520 | 520 |
| LOC100130264 | 0.030284974 | 0.490760477 | 0.57356369 | 520 | 152 |
| MGAT3        | 0.030272572 | 0.490938146 | 0.57369401 | 520 | 520 |
| FAM46D       | 0.030271232 | 0.490957343 | 0.57369401 | 520 | 98  |
| CTAG1B       | 0.030246392 | 0.491313312 | 0.57404344 | 520 | 243 |
| OR5AR1       | 0.030221109 | 0.491675757 | 0.57434795 | 520 | 9   |
| ZNF793       | 0.030220264 | 0.491687874 | 0.57434795 | 520 | 515 |
| ANXA4        | 0.030213954 | 0.491778364 | 0.57442037 | 520 | 520 |
| ARMCX5       | 0.030204588 | 0.49191268  | 0.57453199 | 520 | 520 |
| CHIA         | 0.030203318 | 0.491930903 | 0.57453199 | 520 | 81  |
| ACMSD        | 0.03020059  | 0.491970032 | 0.57454151 | 520 | 150 |

|            |             |             |            |     |     |
|------------|-------------|-------------|------------|-----|-----|
| JAK2       | 0.030198776 | 0.491996047 | 0.57454151 | 520 | 520 |
| C17orf50   | 0.030187703 | 0.492154895 | 0.57469373 | 520 | 341 |
| SERPINE3   | 0.030179595 | 0.492271223 | 0.57479628 | 520 | 198 |
| SPAG4      | 0.030153718 | 0.492642581 | 0.57516328 | 520 | 520 |
| ADRA2B     | 0.030116842 | 0.493172045 | 0.57568143 | 520 | 515 |
| YTHDF1     | 0.030093048 | 0.493513836 | 0.57604706 | 520 | 520 |
| TAOK2      | 0.030075399 | 0.493767443 | 0.57627553 | 520 | 520 |
| HTR4       | 0.030072588 | 0.493807852 | 0.57627553 | 520 | 176 |
| BEND4      | 0.030072504 | 0.493809051 | 0.57627553 | 520 | 394 |
| FLJ40434   | 0.030071472 | 0.493823891 | 0.57627553 | 520 | 20  |
| CATSPER2P1 | 0.030049049 | 0.494146207 | 0.57655156 | 520 | 520 |
| RAB41      | 0.030014057 | 0.494649435 | 0.57707193 | 520 | 466 |
| SOX6       | 0.03000666  | 0.494755855 | 0.5771293  | 520 | 520 |
| RCN2       | 0.029986664 | 0.495043565 | 0.57743151 | 520 | 520 |
| EIF4ENIF1  | 0.029966922 | 0.49532772  | 0.5776627  | 520 | 520 |
| TAS1R1     | 0.029948843 | 0.495588017 | 0.57793284 | 520 | 466 |
| ZNF664     | 0.02992721  | 0.495899573 | 0.57822928 | 520 | 520 |
| GJC3       | 0.02991798  | 0.496032539 | 0.57835088 | 520 | 357 |
| HOXC12     | 0.029902092 | 0.496261454 | 0.57858433 | 520 | 101 |
| ALDH6A1    | 0.02989561  | 0.496354863 | 0.57865977 | 520 | 520 |
| C17orf49   | 0.029856297 | 0.496921591 | 0.57918653 | 520 | 520 |
| HTR1E      | 0.029844164 | 0.497096575 | 0.57934356 | 520 | 69  |
| C21orf94   | 0.029842971 | 0.497113785 | 0.57934356 | 520 | 8   |
| NCRNA00207 | 0.029822668 | 0.497406659 | 0.57958892 | 520 | 22  |
| ACSM4      | 0.0298084   | 0.497612531 | 0.57975727 | 520 | 25  |
| SP6        | 0.029803438 | 0.497684144 | 0.57980317 | 520 | 520 |
| EIF3L      | 0.029800771 | 0.497722639 | 0.57980317 | 520 | 520 |
| GAGE1      | 0.029799694 | 0.497738188 | 0.57980317 | 520 | 94  |
| NUS1       | 0.029779055 | 0.498036101 | 0.58004967 | 520 | 520 |
| USP53      | 0.029756274 | 0.498365063 | 0.58033224 | 520 | 520 |
| RAB1B      | 0.029745298 | 0.4985236   | 0.58048333 | 520 | 520 |
| GRAMD3     | 0.029678296 | 0.499491924 | 0.58144297 | 520 | 520 |
| HPN        | 0.02957932  | 0.500924183 | 0.58300925 | 520 | 480 |
| BHLHA15    | 0.029522723 | 0.501744153 | 0.58382879 | 520 | 473 |
| OSBPL6     | 0.029510988 | 0.501914248 | 0.58399301 | 520 | 520 |
| DRD3       | 0.029503166 | 0.502027652 | 0.58402386 | 520 | 57  |
| MYOC       | 0.029450062 | 0.502797886 | 0.58478494 | 520 | 278 |
| EFHC1      | 0.029412904 | 0.503337208 | 0.58537844 | 520 | 520 |
| NCRNA00235 | 0.02934945  | 0.504258911 | 0.58636401 | 520 | 397 |
| IFI6       | 0.029309685 | 0.504836965 | 0.58691954 | 520 | 520 |
| FAM53C     | 0.029265037 | 0.505486419 | 0.58749033 | 520 | 520 |
| PDE6H      | 0.029263915 | 0.505502735 | 0.58749033 | 520 | 74  |
| HORMAD2    | 0.029256108 | 0.505616348 | 0.58755464 | 520 | 98  |
| NELF       | 0.029234202 | 0.505935203 | 0.58780006 | 520 | 520 |
| OR5R1      | 0.029224949 | 0.506069907 | 0.58791229 | 520 | 4   |
| ASAH1      | 0.029213824 | 0.506231902 | 0.5880666  | 520 | 520 |

|           |             |             |            |     |     |
|-----------|-------------|-------------|------------|-----|-----|
| ZNF256    | 0.029133598 | 0.507400868 | 0.58932268 | 520 | 520 |
| GALNT14   | 0.029129585 | 0.507459379 | 0.58932275 | 520 | 520 |
| POTEG     | 0.029121671 | 0.507574778 | 0.58942282 | 520 | 108 |
| GABRG1    | 0.029104101 | 0.507831037 | 0.58965248 | 520 | 119 |
| LHCGR     | 0.029081678 | 0.50815815  | 0.58989643 | 520 | 72  |
| MAGEB4    | 0.029030572 | 0.508904146 | 0.59072841 | 520 | 37  |
| CDK19     | 0.029000306 | 0.509346199 | 0.59114298 | 520 | 520 |
| NUCB2     | 0.028994268 | 0.509434404 | 0.59120779 | 520 | 520 |
| ADAM18    | 0.028987198 | 0.509537705 | 0.59129364 | 520 | 45  |
| H1FO      | 0.028932708 | 0.510334242 | 0.59211575 | 520 | 520 |
| CLEC16A   | 0.028920925 | 0.510506569 | 0.59224754 | 520 | 520 |
| PROKR1    | 0.028908546 | 0.510687646 | 0.59239667 | 520 | 209 |
| ZBTB44    | 0.028906112 | 0.510723254 | 0.59239667 | 520 | 520 |
| C3orf52   | 0.028901043 | 0.510797404 | 0.5924486  | 520 | 520 |
| CCT6A     | 0.028879772 | 0.511108672 | 0.59277552 | 520 | 520 |
| PPBP      | 0.028861472 | 0.511376527 | 0.59301796 | 520 | 468 |
| WDYHV1    | 0.028841456 | 0.511669601 | 0.59328958 | 520 | 520 |
| CCNY      | 0.028833108 | 0.511791852 | 0.59339721 | 520 | 520 |
| SCARNA6   | 0.028825326 | 0.511905824 | 0.59349523 | 520 | 250 |
| TCL1B     | 0.028800751 | 0.512265854 | 0.59384435 | 520 | 195 |
| MGC12982  | 0.028765324 | 0.51278508  | 0.5943096  | 520 | 520 |
| LOC442421 | 0.028744885 | 0.513084775 | 0.59459789 | 520 | 496 |
| TRIM77    | 0.028744338 | 0.513092802 | 0.59459789 | 520 | 10  |
| PRSS33    | 0.028725308 | 0.513371908 | 0.59485296 | 520 | 219 |
| TMEM216   | 0.028709982 | 0.513596756 | 0.59501092 | 520 | 520 |
| TRAK1     | 0.028686763 | 0.513937481 | 0.59533724 | 520 | 520 |
| TNMD      | 0.028682071 | 0.514006353 | 0.59538282 | 520 | 169 |
| ASB2      | 0.028627781 | 0.514803575 | 0.59613503 | 520 | 520 |
| BZW1      | 0.028617656 | 0.514952325 | 0.59627304 | 520 | 520 |
| ZSCAN12P1 | 0.028603567 | 0.515159344 | 0.59644425 | 520 | 520 |
| NAA15     | 0.028589477 | 0.515366421 | 0.59658123 | 520 | 520 |
| CAPS2     | 0.0285863   | 0.515413124 | 0.59660105 | 520 | 518 |
| EPT1      | 0.028579975 | 0.515506093 | 0.59661604 | 520 | 520 |
| DCAF8L2   | 0.028578549 | 0.515527058 | 0.59661604 | 520 | 76  |
| C14orf39  | 0.028525321 | 0.516309873 | 0.59739899 | 520 | 351 |
| NUDT21    | 0.028450305 | 0.517414153 | 0.59853932 | 520 | 520 |
| C1orf93   | 0.02842494  | 0.517787815 | 0.5988685  | 520 | 520 |
| FBXL21    | 0.028417956 | 0.517890729 | 0.59895318 | 520 | 119 |
| PKIB      | 0.028365555 | 0.51866318  | 0.59970895 | 520 | 520 |
| KLKB1     | 0.028347466 | 0.518929978 | 0.59998303 | 520 | 423 |
| EPHA4     | 0.028333192 | 0.51914056  | 0.60019209 | 520 | 520 |
| TSC2      | 0.028257432 | 0.520258936 | 0.60124376 | 520 | 520 |
| GLYATL2   | 0.028254429 | 0.5203033   | 0.60126057 | 520 | 468 |
| MATN4     | 0.028245671 | 0.520432665 | 0.60136239 | 520 | 492 |
| SYP       | 0.028244426 | 0.520451057 | 0.60136239 | 520 | 518 |
| SCLY      | 0.028236797 | 0.520563766 | 0.60145816 | 520 | 520 |

|           |             |             |            |     |     |
|-----------|-------------|-------------|------------|-----|-----|
| THTPA     | 0.028219016 | 0.520826512 | 0.60172362 | 520 | 520 |
| GYP A     | 0.028215696 | 0.520875589 | 0.60172362 | 520 | 33  |
| NSL1      | 0.028215191 | 0.520883047 | 0.60172362 | 520 | 520 |
| ZFC3H1    | 0.028210111 | 0.520958132 | 0.60177588 | 520 | 520 |
| AHSG      | 0.028193685 | 0.521200942 | 0.60198739 | 520 | 387 |
| SPEM1     | 0.028142692 | 0.521955111 | 0.60268584 | 520 | 150 |
| XKR4      | 0.028138625 | 0.522015284 | 0.60272081 | 520 | 271 |
| DNAJC4    | 0.028113729 | 0.522383707 | 0.6030426  | 520 | 520 |
| SLC7A10   | 0.028077865 | 0.522914686 | 0.60362101 | 520 | 325 |
| KCNH5     | 0.028072013 | 0.523001343 | 0.60368648 | 520 | 250 |
| NFKB2     | 0.028052846 | 0.523285257 | 0.60391516 | 520 | 520 |
| TTC31     | 0.02805149  | 0.523305348 | 0.60391516 | 520 | 520 |
| CTNNA2    | 0.028050551 | 0.523319261 | 0.60391516 | 520 | 246 |
| SNAR-B2   | 0.028022424 | 0.52373604  | 0.60432695 | 520 | 7   |
| BNIP3     | 0.02801731  | 0.52381183  | 0.60437982 | 520 | 520 |
| SSX2      | 0.027984683 | 0.524295538 | 0.60490188 | 520 | 92  |
| CD2       | 0.027982744 | 0.524324295 | 0.60490188 | 520 | 520 |
| C2orf80   | 0.027938192 | 0.524985195 | 0.60555631 | 520 | 75  |
| UGT2B10   | 0.027932549 | 0.525068935 | 0.60555631 | 520 | 102 |
| C6orf150  | 0.02793236  | 0.525071742 | 0.60555631 | 520 | 520 |
| SLC30A9   | 0.027876274 | 0.525904403 | 0.60644724 | 520 | 520 |
| APOH      | 0.027859087 | 0.526159702 | 0.60663756 | 520 | 128 |
| NBPF6     | 0.027821276 | 0.526721558 | 0.60707708 | 520 | 95  |
| CLEC17A   | 0.027814963 | 0.526815397 | 0.60715053 | 520 | 465 |
| NDRG4     | 0.027812885 | 0.526846293 | 0.60715143 | 520 | 520 |
| DLST      | 0.027757601 | 0.52766845  | 0.60802941 | 520 | 520 |
| LOC286094 | 0.027710957 | 0.528362634 | 0.60878244 | 520 | 17  |
| CCNG1     | 0.027707273 | 0.528417476 | 0.60878814 | 520 | 520 |
| TNFRSF10D | 0.02764876  | 0.529289011 | 0.60968772 | 520 | 520 |
| DCTN4     | 0.02764668  | 0.529319992 | 0.60968858 | 520 | 520 |
| HBE1      | 0.027619371 | 0.529727006 | 0.61012254 | 520 | 238 |
| GK3P      | 0.027589501 | 0.530172376 | 0.61056575 | 520 | 519 |
| SLC18A1   | 0.027580671 | 0.530304076 | 0.61068255 | 520 | 277 |
| HKR1      | 0.027575503 | 0.530381153 | 0.61070995 | 520 | 520 |
| TRIML1    | 0.027575014 | 0.530388449 | 0.61070995 | 520 | 377 |
| LOC286367 | 0.027540319 | 0.530906109 | 0.6112711  | 520 | 519 |
| PIK3R4    | 0.027480907 | 0.531793127 | 0.6122038  | 520 | 520 |
| OR56A3    | 0.02747996  | 0.53180727  | 0.6122038  | 520 | 58  |
| ATG5      | 0.027356933 | 0.533646469 | 0.61414573 | 520 | 520 |
| RNF20     | 0.027325318 | 0.534119619 | 0.6146201  | 520 | 520 |
| MCART2    | 0.02731661  | 0.53424998  | 0.61473223 | 520 | 519 |
| PCDH15    | 0.027314736 | 0.534278033 | 0.61473223 | 520 | 376 |
| LOC729234 | 0.027309214 | 0.534360714 | 0.61479228 | 520 | 519 |
| GAB1      | 0.027298159 | 0.534526251 | 0.61494764 | 520 | 520 |
| LOC150527 | 0.027295013 | 0.534573362 | 0.61496675 | 520 | 79  |
| BTBD2     | 0.027286858 | 0.534695491 | 0.61507216 | 520 | 520 |

|                     |             |             |            |     |     |
|---------------------|-------------|-------------|------------|-----|-----|
| SLC35C2             | 0.02727843  | 0.534821739 | 0.61518229 | 520 | 520 |
| PDK1                | 0.027263551 | 0.535044632 | 0.61536847 | 520 | 520 |
| SCXB                | 0.027236024 | 0.535457135 | 0.61577265 | 520 | 501 |
| FMO2                | 0.027224921 | 0.535623556 | 0.61592891 | 520 | 519 |
| MAP3K10             | 0.027198633 | 0.536017692 | 0.61631184 | 520 | 520 |
| FAM18A              | 0.02719546  | 0.536065281 | 0.61633141 | 520 | 519 |
| FEV                 | 0.027186301 | 0.536202647 | 0.6164542  | 520 | 87  |
| ODF1                | 0.027182025 | 0.536266779 | 0.61649278 | 520 | 70  |
| TM2D1               | 0.027108145 | 0.537375523 | 0.61764875 | 520 | 520 |
| MUTED               | 0.027093265 | 0.537598958 | 0.61781005 | 520 | 520 |
| FOLH1               | 0.027084439 | 0.537731523 | 0.61789483 | 520 | 519 |
| ABCA3               | 0.027078637 | 0.537818672 | 0.61795975 | 520 | 520 |
| TTY10               | 0.027034054 | 0.538488567 | 0.61862372 | 520 | 125 |
| CLEC4F              | 0.027019006 | 0.538714786 | 0.61884834 | 520 | 451 |
| LOC727677           | 0.02700957  | 0.538856653 | 0.61897605 | 520 | 166 |
| ZBTB6               | 0.026991167 | 0.539133381 | 0.6191881  | 520 | 520 |
| ZNF592              | 0.026963887 | 0.539543736 | 0.61955352 | 520 | 520 |
| FNBP1               | 0.026957035 | 0.539646843 | 0.61963663 | 520 | 520 |
| PAN3                | 0.026933084 | 0.540007285 | 0.61991146 | 520 | 520 |
| ZNF606              | 0.026899689 | 0.540510054 | 0.62045114 | 520 | 520 |
| KLHL13              | 0.026880858 | 0.54079366  | 0.62074135 | 520 | 520 |
| KHSRP               | 0.026872925 | 0.540913158 | 0.62084318 | 520 | 520 |
| TOP1MT              | 0.026834597 | 0.5414907   | 0.62139995 | 520 | 520 |
| ANKHD1-<br>EIF4EBP3 | 0.026792373 | 0.542127308 | 0.6220951  | 520 | 520 |
| UTY                 | 0.026784641 | 0.542243912 | 0.62219349 | 520 | 432 |
| APBA3               | 0.026768155 | 0.542492593 | 0.62243064 | 520 | 520 |
| C5orf28             | 0.026738174 | 0.542944993 | 0.6227853  | 520 | 520 |
| C16orf80            | 0.026732687 | 0.543027812 | 0.62284487 | 520 | 520 |
| ARVCF               | 0.026712252 | 0.543336286 | 0.62312779 | 520 | 520 |
| CRYL1               | 0.026685519 | 0.543739968 | 0.62351983 | 520 | 520 |
| PARP15              | 0.026651842 | 0.544248724 | 0.62399677 | 520 | 515 |
| OR52K2              | 0.026633131 | 0.544531499 | 0.62428549 | 520 | 50  |
| SYT15               | 0.026606775 | 0.544929929 | 0.62458483 | 520 | 519 |
| GAGE4               | 0.026601626 | 0.545007777 | 0.62458483 | 520 | 159 |
| C7orf45             | 0.026594339 | 0.545117972 | 0.62463822 | 520 | 95  |
| SNRNP27             | 0.026590567 | 0.545175016 | 0.62466809 | 520 | 520 |
| UNCX                | 0.026556405 | 0.545691776 | 0.62522467 | 520 | 18  |
| TBCCD1              | 0.026492378 | 0.546660948 | 0.62619277 | 520 | 520 |
| PMM2                | 0.026423613 | 0.547702781 | 0.62735054 | 520 | 520 |
| AP3B2               | 0.02641156  | 0.547885494 | 0.62745289 | 520 | 516 |
| SHH                 | 0.026402988 | 0.548015449 | 0.62756608 | 520 | 313 |
| HTN3                | 0.026391011 | 0.548197064 | 0.62770276 | 520 | 74  |
| KIAA1310            | 0.026366845 | 0.548563579 | 0.6280511  | 520 | 520 |
| EPB41L5             | 0.026351062 | 0.548803032 | 0.62828958 | 520 | 520 |
| C9orf106            | 0.026344305 | 0.548905562 | 0.62837128 | 520 | 158 |

|              |             |             |            |     |     |
|--------------|-------------|-------------|------------|-----|-----|
| PRAMEF6      | 0.026340846 | 0.54895804  | 0.62839568 | 520 | 79  |
| FAM40B       | 0.026334995 | 0.549046835 | 0.62845048 | 520 | 520 |
| C14orf48     | 0.026311959 | 0.549396494 | 0.62868344 | 520 | 142 |
| PDX1         | 0.026297785 | 0.54961169  | 0.628894   | 520 | 291 |
| KIF25        | 0.026293286 | 0.549679992 | 0.62890078 | 520 | 364 |
| FLJ40292     | 0.026276958 | 0.549927957 | 0.62911309 | 520 | 417 |
| C2orf27B     | 0.02623263  | 0.550601418 | 0.62984779 | 520 | 14  |
| LOC644145    | 0.026180994 | 0.551386407 | 0.6305669  | 520 | 23  |
| CCL19        | 0.026161665 | 0.551680403 | 0.63076002 | 520 | 520 |
| OR6C6        | 0.026135727 | 0.552075029 | 0.63106808 | 520 | 11  |
| HTN1         | 0.026095567 | 0.552686319 | 0.63162361 | 520 | 105 |
| OR2M3        | 0.026071471 | 0.553053246 | 0.63197131 | 520 | 12  |
| KLK5         | 0.026045264 | 0.553452467 | 0.63239166 | 520 | 515 |
| OR13C3       | 0.026037086 | 0.553577062 | 0.63249818 | 520 | 28  |
| SCLT1        | 0.026033545 | 0.553631022 | 0.63251276 | 520 | 520 |
| ABCC6        | 0.026025569 | 0.55375256  | 0.63259116 | 520 | 513 |
| IQUB         | 0.026001528 | 0.554119005 | 0.63285444 | 520 | 510 |
| CYP17A1      | 0.026000731 | 0.554131149 | 0.63285444 | 520 | 266 |
| PNPLA8       | 0.025968439 | 0.554623541 | 0.63333498 | 520 | 520 |
| ZNF785       | 0.025962797 | 0.554709602 | 0.63339739 | 520 | 520 |
| MAPKAPK3     | 0.02592733  | 0.555250685 | 0.63390753 | 520 | 520 |
| PANX3        | 0.025856358 | 0.556334217 | 0.63504019 | 520 | 47  |
| SLC32A1      | 0.025853634 | 0.556375822 | 0.63504823 | 520 | 179 |
| CLCN5        | 0.025842136 | 0.556551475 | 0.63516518 | 520 | 520 |
| NLRP1        | 0.025841583 | 0.55655991  | 0.63516518 | 520 | 520 |
| LOC100132724 | 0.025840741 | 0.556572784 | 0.63516518 | 520 | 517 |
| DAO          | 0.025808939 | 0.557058741 | 0.63568378 | 520 | 165 |
| RBM20        | 0.025793365 | 0.5572968   | 0.63588347 | 520 | 516 |
| ACTG1        | 0.02577906  | 0.557515499 | 0.63606102 | 520 | 520 |
| ST7OT3       | 0.025753789 | 0.557901951 | 0.6363939  | 520 | 435 |
| TPI1P2       | 0.025704906 | 0.558649873 | 0.63713892 | 520 | 520 |
| TCHH         | 0.025702083 | 0.558693072 | 0.63714113 | 520 | 520 |
| XPO6         | 0.025675703 | 0.559096907 | 0.63740575 | 520 | 520 |
| RANBP6       | 0.025600685 | 0.560246093 | 0.63852601 | 520 | 520 |
| SNAI3        | 0.025587372 | 0.560450139 | 0.63868637 | 520 | 520 |
| UHRF1BP1     | 0.02557245  | 0.560678903 | 0.63891096 | 520 | 520 |
| CYBA         | 0.025553942 | 0.560962708 | 0.63919824 | 520 | 520 |
| SAPS3        | 0.025538832 | 0.561194442 | 0.63933755 | 520 | 520 |
| NUDT16       | 0.025504202 | 0.561725748 | 0.63985075 | 520 | 520 |
| DPRX         | 0.025487998 | 0.561974432 | 0.64009786 | 520 | 52  |
| SLC12A3      | 0.025475813 | 0.562161487 | 0.64027475 | 520 | 477 |
| ZMYND15      | 0.025433659 | 0.562808796 | 0.6409396  | 520 | 520 |
| FLJ36000     | 0.025394278 | 0.563413832 | 0.64155616 | 520 | 137 |
| LOC642929    | 0.025324435 | 0.564487666 | 0.64238927 | 520 | 9   |
| IFT46        | 0.0253239   | 0.564495907 | 0.64238927 | 520 | 520 |
| TUBA1B       | 0.025164396 | 0.566951964 | 0.64472146 | 520 | 520 |

|              |             |             |            |     |     |
|--------------|-------------|-------------|------------|-----|-----|
| TMEM212      | 0.025163812 | 0.566960963 | 0.64472146 | 520 | 186 |
| CBX5         | 0.02515885  | 0.567037455 | 0.64474837 | 520 | 520 |
| C1orf203     | 0.025158128 | 0.567048585 | 0.64474837 | 520 | 520 |
| LOC100128288 | 0.025113527 | 0.567736327 | 0.64545756 | 520 | 517 |
| SLC2A2       | 0.025104418 | 0.567876827 | 0.6455809  | 520 | 84  |
| RRAGB        | 0.02508589  | 0.568162682 | 0.64586945 | 520 | 520 |
| PPP2R1B      | 0.025068411 | 0.568432406 | 0.64613964 | 520 | 520 |
| MYCBPAP      | 0.024994621 | 0.56957178  | 0.6472637  | 520 | 496 |
| FABP1        | 0.024993973 | 0.569581784 | 0.6472637  | 520 | 110 |
| ZNF282       | 0.024972602 | 0.569911976 | 0.64756594 | 520 | 520 |
| SVOPL        | 0.024946242 | 0.570319366 | 0.64799232 | 520 | 448 |
| MLYCD        | 0.024938624 | 0.570437138 | 0.64805511 | 520 | 520 |
| RPRD2        | 0.02493851  | 0.570438905 | 0.64805511 | 520 | 520 |
| QPCTL        | 0.024931281 | 0.570550658 | 0.64810903 | 520 | 520 |
| ATXN10       | 0.0248151   | 0.572348242 | 0.64998268 | 520 | 520 |
| OR2C1        | 0.024788955 | 0.572753119 | 0.6503178  | 520 | 221 |
| C17orf80     | 0.02477217  | 0.573013136 | 0.65053977 | 520 | 520 |
| KRTAP3-3     | 0.024754691 | 0.573283952 | 0.65073731 | 520 | 55  |
| C19orf66     | 0.024748118 | 0.57338581  | 0.65081629 | 520 | 520 |
| C17orf105    | 0.024732155 | 0.573633221 | 0.65106047 | 520 | 49  |
| ARL14        | 0.024702166 | 0.574098141 | 0.65155147 | 520 | 506 |
| FGG          | 0.024695486 | 0.574201734 | 0.65163236 | 520 | 276 |
| FSHR         | 0.024663623 | 0.574695941 | 0.65211981 | 520 | 35  |
| FOXP4        | 0.02463817  | 0.575090875 | 0.6524578  | 520 | 520 |
| SPAST        | 0.024629587 | 0.575224079 | 0.6525722  | 520 | 520 |
| GTSE1        | 0.024612028 | 0.575496634 | 0.65277371 | 520 | 520 |
| ZNF141       | 0.02460904  | 0.575543022 | 0.65277371 | 520 | 520 |
| ART4         | 0.024606725 | 0.575578957 | 0.65277371 | 520 | 282 |
| TTLL5        | 0.024605898 | 0.575591806 | 0.65277371 | 520 | 520 |
| EFCAB6       | 0.024547143 | 0.576504325 | 0.65356804 | 520 | 510 |
| OR10G2       | 0.024540991 | 0.576599902 | 0.65356804 | 520 | 45  |
| KIAA0831     | 0.024538331 | 0.576641229 | 0.65356804 | 520 | 520 |
| ZNF836       | 0.024538171 | 0.576643724 | 0.65356804 | 520 | 520 |
| DHX29        | 0.024537581 | 0.576652894 | 0.65356804 | 520 | 520 |
| OAS3         | 0.024521157 | 0.576908127 | 0.65371034 | 520 | 520 |
| OR8K1        | 0.024508882 | 0.577098911 | 0.65382797 | 520 | 20  |
| LOC729467    | 0.024508219 | 0.577109213 | 0.65382797 | 520 | 133 |
| APCS         | 0.024497974 | 0.577268482 | 0.65397167 | 520 | 51  |
| HLA-G        | 0.02449337  | 0.577340055 | 0.654016   | 520 | 520 |
| GPR171       | 0.024487426 | 0.577432475 | 0.65405162 | 520 | 518 |
| TIFAB        | 0.024480542 | 0.577539516 | 0.65413171 | 520 | 510 |
| SLC9A11      | 0.024475845 | 0.577612563 | 0.65414096 | 520 | 108 |
| ECD          | 0.024466694 | 0.577754863 | 0.65426536 | 520 | 520 |
| UBE2NL       | 0.024462198 | 0.577824795 | 0.65430781 | 520 | 519 |
| XKRY2        | 0.02443867  | 0.578190788 | 0.65461196 | 520 | 18  |
| POU2F1       | 0.024413103 | 0.578588625 | 0.65498883 | 520 | 520 |

|           |             |             |            |     |     |
|-----------|-------------|-------------|------------|-----|-----|
| NMD3      | 0.024400179 | 0.578789778 | 0.65517976 | 520 | 520 |
| FASN      | 0.024365535 | 0.579329154 | 0.65556951 | 520 | 520 |
| TMEM17    | 0.024315792 | 0.580104017 | 0.6562622  | 520 | 520 |
| CABP2     | 0.024277649 | 0.580698509 | 0.65671367 | 520 | 13  |
| CLEC12B   | 0.02424163  | 0.581260143 | 0.6572751  | 520 | 449 |
| TAF1B     | 0.024203519 | 0.581854687 | 0.65779984 | 520 | 520 |
| DTWD1     | 0.024181606 | 0.582196671 | 0.65803888 | 520 | 520 |
| SGK223    | 0.024125756 | 0.583068708 | 0.65883987 | 520 | 520 |
| NAA40     | 0.024088514 | 0.583650522 | 0.65946033 | 520 | 520 |
| NFASC     | 0.024084604 | 0.583711621 | 0.65949242 | 520 | 520 |
| GYG1      | 0.024080815 | 0.583770837 | 0.65952236 | 520 | 520 |
| MC3R      | 0.024071862 | 0.583910762 | 0.65964349 | 520 | 61  |
| GAL       | 0.02405947  | 0.584104468 | 0.65975143 | 520 | 496 |
| OR2D2     | 0.024019285 | 0.584732796 | 0.66031318 | 520 | 30  |
| DDX3X     | 0.02401566  | 0.584789493 | 0.66034022 | 520 | 520 |
| E2F7      | 0.023957286 | 0.585702821 | 0.66122343 | 520 | 520 |
| TCHHL1    | 0.02394195  | 0.585942882 | 0.66142038 | 520 | 421 |
| LOC283914 | 0.023923632 | 0.58622968  | 0.66159597 | 520 | 48  |
| C3orf16   | 0.023899906 | 0.586601241 | 0.66197825 | 520 | 385 |
| GFRA3     | 0.023883567 | 0.586857184 | 0.66219296 | 520 | 500 |
| CRYAA     | 0.023877083 | 0.58695877  | 0.66227053 | 520 | 255 |
| C20orf20  | 0.023852514 | 0.587343767 | 0.66266784 | 520 | 520 |
| PAQR5     | 0.023799185 | 0.588179815 | 0.66353686 | 520 | 520 |
| ABCF1     | 0.023772544 | 0.588597679 | 0.66387143 | 520 | 520 |
| ADAMTS19  | 0.023771881 | 0.588608084 | 0.66387143 | 520 | 179 |
| C1QL3     | 0.023722109 | 0.589389124 | 0.66464081 | 520 | 483 |
| SNORA59B  | 0.023701871 | 0.589706853 | 0.66492473 | 520 | 186 |
| UBE3B     | 0.023676765 | 0.590101097 | 0.66533206 | 520 | 520 |
| PTPN7     | 0.023670019 | 0.590207056 | 0.66541432 | 520 | 520 |
| TMEM120B  | 0.023614075 | 0.591086086 | 0.6663681  | 520 | 520 |
| WWP2      | 0.023587257 | 0.591507686 | 0.66676884 | 520 | 520 |
| TMEM220   | 0.023569186 | 0.591791848 | 0.66705187 | 520 | 519 |
| ZNF410    | 0.023525761 | 0.592474949 | 0.66773826 | 520 | 520 |
| CAMKV     | 0.023505463 | 0.592794375 | 0.66803251 | 520 | 412 |
| WIPF2     | 0.023486167 | 0.593098104 | 0.66830009 | 520 | 520 |
| OR4D1     | 0.023446645 | 0.59372044  | 0.66896396 | 520 | 21  |
| AMELX     | 0.023431409 | 0.593960424 | 0.66915957 | 520 | 23  |
| CD40LG    | 0.023418016 | 0.594171419 | 0.66935988 | 520 | 489 |
| LOC90834  | 0.023404211 | 0.594388933 | 0.66953011 | 520 | 512 |
| PRAMEF5   | 0.02336722  | 0.594971973 | 0.67007456 | 520 | 36  |
| NDST3     | 0.023337116 | 0.595446655 | 0.67053425 | 520 | 342 |
| SLC25A31  | 0.023308571 | 0.595896917 | 0.67096635 | 520 | 89  |
| ZNF654    | 0.023260848 | 0.596650024 | 0.67177682 | 520 | 520 |
| ZNF233    | 0.023219379 | 0.59730479  | 0.67243894 | 520 | 519 |
| THAP5     | 0.023155755 | 0.598309997 | 0.67345779 | 520 | 520 |
| MYRIP     | 0.023139233 | 0.598571157 | 0.67356375 | 520 | 495 |



|           |             |             |            |     |     |
|-----------|-------------|-------------|------------|-----|-----|
| LOC90246  | 0.023133167 | 0.59866705  | 0.67359647 | 520 | 509 |
| BTC       | 0.023128188 | 0.598745761 | 0.67360986 | 520 | 470 |
| PLCH1     | 0.023106648 | 0.599086371 | 0.67391786 | 520 | 515 |
| ZNF682    | 0.023020467 | 0.600449968 | 0.67522576 | 520 | 516 |
| CMTM5     | 0.022981614 | 0.601065186 | 0.67580453 | 520 | 338 |
| PSTPIP1   | 0.022973073 | 0.601200462 | 0.67584357 | 520 | 520 |
| IFIT1B    | 0.022955823 | 0.601473727 | 0.67611307 | 520 | 311 |
| GAGE2B    | 0.022927531 | 0.601922025 | 0.67642845 | 520 | 53  |
| PHRF1     | 0.022922697 | 0.601998648 | 0.67643916 | 520 | 520 |
| ZC3H11A   | 0.022871833 | 0.602805029 | 0.67700572 | 520 | 520 |
| HOXD12    | 0.022866753 | 0.602885602 | 0.67705849 | 520 | 203 |
| CACNB4    | 0.022842383 | 0.603272144 | 0.67737941 | 520 | 508 |
| PAQR9     | 0.022830245 | 0.603464717 | 0.67748247 | 520 | 273 |
| RIT1      | 0.022817369 | 0.603669027 | 0.6776741  | 520 | 520 |
| SOHLH1    | 0.022777105 | 0.60430813  | 0.67827827 | 520 | 266 |
| HSD3B1    | 0.02275661  | 0.604633549 | 0.67860575 | 520 | 61  |
| ANKRD26   | 0.022743761 | 0.604837607 | 0.67879699 | 520 | 520 |
| UBE3A     | 0.022654854 | 0.60625042  | 0.68030683 | 520 | 520 |
| TAS2R1    | 0.022644075 | 0.606421809 | 0.68042924 | 520 | 54  |
| FAM76B    | 0.022631317 | 0.606624684 | 0.68061318 | 520 | 520 |
| NUCKS1    | 0.022627884 | 0.606679278 | 0.68063656 | 520 | 520 |
| HABP2     | 0.022622544 | 0.606764211 | 0.68069398 | 520 | 450 |
| IRAK1     | 0.022606025 | 0.607026971 | 0.68087511 | 520 | 520 |
| FCHO2     | 0.02258927  | 0.607293543 | 0.68110941 | 520 | 520 |
| TAPBPL    | 0.022588649 | 0.60730342  | 0.68110941 | 520 | 520 |
| CLECL1    | 0.022579283 | 0.607452457 | 0.68123867 | 520 | 492 |
| ADAP1     | 0.022566543 | 0.607655207 | 0.68142815 | 520 | 520 |
| RBMY1F    | 0.022536039 | 0.608140778 | 0.681821   | 520 | 3   |
| NCOA4     | 0.022526868 | 0.60828681  | 0.68194681 | 520 | 520 |
| SLIT1     | 0.022517548 | 0.608435205 | 0.68207525 | 520 | 511 |
| LOC347376 | 0.022509599 | 0.608561801 | 0.68217924 | 520 | 173 |
| PRMT6     | 0.022495581 | 0.608785077 | 0.68239159 | 520 | 520 |
| ATOH7     | 0.022469963 | 0.609193191 | 0.68273519 | 520 | 372 |
| UBE2U     | 0.022436997 | 0.60971856  | 0.6831721  | 520 | 122 |
| NOL6      | 0.022417248 | 0.610033382 | 0.68348686 | 520 | 520 |
| RBMY1A1   | 0.022399595 | 0.610314855 | 0.68372625 | 520 | 43  |
| FAM71D    | 0.022367567 | 0.610825683 | 0.6841806  | 520 | 520 |
| SCARNA14  | 0.022365657 | 0.610856147 | 0.6841806  | 520 | 4   |
| FAM83B    | 0.02235544  | 0.611019145 | 0.68432515 | 520 | 520 |
| OR51B2    | 0.022333292 | 0.611372548 | 0.68456785 | 520 | 68  |
| ELOVL6    | 0.022329094 | 0.611439548 | 0.68456785 | 520 | 520 |
| TNIP1     | 0.022323082 | 0.611535489 | 0.68463726 | 520 | 520 |
| ATP6V1B2  | 0.022290928 | 0.612048784 | 0.68515878 | 520 | 520 |
| TINAG     | 0.022289644 | 0.612069284 | 0.68515878 | 520 | 275 |
| GAN       | 0.022279199 | 0.612236066 | 0.68529719 | 520 | 520 |
| LRR3B     | 0.022265532 | 0.612454323 | 0.68543758 | 520 | 162 |

|            |             |             |            |     |     |
|------------|-------------|-------------|------------|-----|-----|
| COL21A1    | 0.022222783 | 0.613137235 | 0.6861343  | 520 | 516 |
| HECA       | 0.022193579 | 0.613603957 | 0.68650826 | 520 | 520 |
| HIST1H2BM  | 0.022190564 | 0.613652164 | 0.68650826 | 520 | 367 |
| UBN2       | 0.022162519 | 0.614100525 | 0.68693681 | 520 | 520 |
| EFTUD2     | 0.022142471 | 0.61442113  | 0.68725732 | 520 | 520 |
| DAZ3       | 0.022114896 | 0.614862224 | 0.68752187 | 520 | 35  |
| AGAP3      | 0.022061868 | 0.615710853 | 0.68812735 | 520 | 520 |
| RHBDL3     | 0.021971874 | 0.617152243 | 0.68966182 | 520 | 519 |
| GPR26      | 0.021967013 | 0.617230142 | 0.68971065 | 520 | 251 |
| BEYLA      | 0.021963331 | 0.617289137 | 0.68973834 | 520 | 19  |
| SLAIN1     | 0.021938478 | 0.617687505 | 0.69006875 | 520 | 516 |
| OR12D2     | 0.021936118 | 0.617725341 | 0.69007279 | 520 | 12  |
| LNX2       | 0.021909026 | 0.618159715 | 0.69040503 | 520 | 520 |
| SLAIN2     | 0.021882853 | 0.618579493 | 0.69080058 | 520 | 520 |
| EXOC2      | 0.021862121 | 0.618912096 | 0.6911305  | 520 | 520 |
| IRAK1BP1   | 0.021853598 | 0.619048848 | 0.69120665 | 520 | 519 |
| PATE3      | 0.021847686 | 0.61914372  | 0.69127431 | 520 | 28  |
| ZNF300     | 0.021834281 | 0.619358843 | 0.6914762  | 520 | 519 |
| SPDYE4     | 0.021789565 | 0.620076691 | 0.69216267 | 520 | 37  |
| NCRNA00160 | 0.021775563 | 0.620301551 | 0.69233701 | 520 | 250 |
| CARD9      | 0.021769116 | 0.620405099 | 0.69241426 | 520 | 520 |
| MTPP       | 0.021748241 | 0.620740419 | 0.69263515 | 520 | 420 |
| HSPB8      | 0.021702791 | 0.621470777 | 0.69329664 | 520 | 520 |
| FOXB2      | 0.021699532 | 0.621523152 | 0.69331671 | 520 | 33  |
| NCRNA00095 | 0.021695911 | 0.621581365 | 0.69334329 | 520 | 520 |
| GJB7       | 0.021645381 | 0.622393843 | 0.69405021 | 520 | 438 |
| GTF3C1     | 0.021643652 | 0.622421643 | 0.69405021 | 520 | 520 |
| SMYD5      | 0.021631225 | 0.622621542 | 0.69423473 | 520 | 520 |
| DEF8       | 0.021627328 | 0.622684232 | 0.69426623 | 520 | 520 |
| OAS2       | 0.021579434 | 0.623454903 | 0.69485655 | 520 | 520 |
| MADCAM1    | 0.021520326 | 0.624406592 | 0.6957634  | 520 | 367 |
| AOC2       | 0.021494757 | 0.624818465 | 0.69610694 | 520 | 520 |
| RESP18     | 0.021480527 | 0.625047732 | 0.69632389 | 520 | 20  |
| NKAIN3     | 0.021472879 | 0.625170983 | 0.69642272 | 520 | 44  |
| BDKRB2     | 0.021440584 | 0.625691498 | 0.69690318 | 520 | 520 |
| THEMIS     | 0.021383114 | 0.626618221 | 0.6978036  | 520 | 506 |
| ATP2B3     | 0.02137166  | 0.626802991 | 0.6978552  | 520 | 262 |
| LOC440040  | 0.02136473  | 0.626914801 | 0.69794115 | 520 | 155 |
| CD3EAP     | 0.021357126 | 0.627037482 | 0.69803919 | 520 | 520 |
| NDFIP2     | 0.021280796 | 0.628269613 | 0.69914064 | 520 | 520 |
| SBF1       | 0.021236423 | 0.628986355 | 0.69982237 | 520 | 520 |
| TGS1       | 0.021214979 | 0.629332866 | 0.70015864 | 520 | 520 |
| WNK3       | 0.021213421 | 0.629358034 | 0.70015864 | 520 | 475 |
| HES6       | 0.021209156 | 0.629426959 | 0.70019669 | 520 | 520 |
| EVS2       | 0.021198332 | 0.62960191  | 0.70035267 | 520 | 45  |
| DOK4       | 0.021135889 | 0.630611551 | 0.70132102 | 520 | 520 |

|              |             |             |            |     |     |
|--------------|-------------|-------------|------------|-----|-----|
| LRRTM3       | 0.021111246 | 0.631010183 | 0.70172564 | 520 | 123 |
| LOC100240734 | 0.021087391 | 0.631396181 | 0.70210425 | 520 | 178 |
| BRE          | 0.021085902 | 0.631420275 | 0.70210425 | 520 | 520 |
| RARS2        | 0.021049203 | 0.632014306 | 0.7026098  | 520 | 520 |
| CLCNKB       | 0.021019476 | 0.632495661 | 0.70310615 | 520 | 402 |
| ZNF655       | 0.020985697 | 0.633042796 | 0.70363679 | 520 | 520 |
| GOLGB1       | 0.020968753 | 0.633317337 | 0.70390314 | 520 | 520 |
| MBL2         | 0.020957236 | 0.633503964 | 0.70407176 | 520 | 117 |
| ERGIC2       | 0.020930377 | 0.633939309 | 0.70445211 | 520 | 520 |
| RNASEH1      | 0.020929656 | 0.633950998 | 0.70445211 | 520 | 520 |
| MRAP         | 0.020917698 | 0.634144856 | 0.70462869 | 520 | 57  |
| NHEG1        | 0.020905184 | 0.634347761 | 0.70481531 | 520 | 165 |
| TEX14        | 0.020892699 | 0.634550211 | 0.70496256 | 520 | 515 |
| AHCYL2       | 0.020875342 | 0.634831726 | 0.70523646 | 520 | 520 |
| TSPY3        | 0.020838088 | 0.635436103 | 0.70571346 | 520 | 23  |
| MMP15        | 0.020777951 | 0.636412253 | 0.70671972 | 520 | 520 |
| LPA          | 0.020750899 | 0.636851565 | 0.70709074 | 520 | 312 |
| APH1A        | 0.020631508 | 0.63879194  | 0.70893283 | 520 | 520 |
| STXBP5L      | 0.02059561  | 0.639375845 | 0.70944935 | 520 | 394 |
| RHBDD2       | 0.020580592 | 0.639620187 | 0.70961769 | 520 | 520 |
| LOC100130581 | 0.020565217 | 0.639870388 | 0.7098189  | 520 | 519 |
| HSF2         | 0.0205445   | 0.640207581 | 0.71011308 | 520 | 520 |
| KIF27        | 0.020533092 | 0.640393285 | 0.71024092 | 520 | 519 |
| ZNF644       | 0.020525706 | 0.640513534 | 0.71028764 | 520 | 520 |
| ATXN3L       | 0.020524013 | 0.640541086 | 0.71028764 | 520 | 15  |
| NLRP2        | 0.02050199  | 0.640899686 | 0.71056806 | 520 | 518 |
| OR13J1       | 0.020485603 | 0.641166579 | 0.71082488 | 520 | 65  |
| KRT34        | 0.020461511 | 0.641559033 | 0.71114267 | 520 | 508 |
| SHISA9       | 0.020435653 | 0.641980377 | 0.71153149 | 520 | 431 |
| ARAF         | 0.020430187 | 0.642069445 | 0.71159109 | 520 | 520 |
| C8orf51      | 0.020402399 | 0.642522395 | 0.71201481 | 520 | 518 |
| MLANA        | 0.02037365  | 0.642991124 | 0.71241678 | 520 | 459 |
| C17orf39     | 0.020345073 | 0.643457199 | 0.71281568 | 520 | 520 |
| AK3L1        | 0.020336247 | 0.643601183 | 0.71289685 | 520 | 520 |
| RAB3A        | 0.020279992 | 0.644519168 | 0.71379604 | 520 | 520 |
| MANF         | 0.020268463 | 0.644707376 | 0.71396526 | 520 | 520 |
| PITRM1       | 0.020214491 | 0.645588711 | 0.71478425 | 520 | 520 |
| TMED1        | 0.020210322 | 0.645656818 | 0.71482041 | 520 | 520 |
| TMEM71       | 0.020207157 | 0.645708516 | 0.71483839 | 520 | 520 |
| MPV17L       | 0.020184797 | 0.646073815 | 0.71516427 | 520 | 503 |
| ACTRT2       | 0.020144161 | 0.646737935 | 0.71582082 | 520 | 16  |
| C15orf37     | 0.02013459  | 0.646894391 | 0.7158761  | 520 | 520 |
| FECH         | 0.020120587 | 0.647123323 | 0.71607432 | 520 | 520 |
| DCAF6        | 0.020114873 | 0.647216747 | 0.71611493 | 520 | 520 |
| UBXN2B       | 0.020109626 | 0.647302541 | 0.71617056 | 520 | 520 |
| C18orf19     | 0.020061395 | 0.648091423 | 0.71684671 | 520 | 520 |

|           |             |             |            |     |     |
|-----------|-------------|-------------|------------|-----|-----|
| RIPPLY1   | 0.020045356 | 0.648353843 | 0.71701897 | 520 | 198 |
| SLC26A1   | 0.020041621 | 0.648414963 | 0.71704724 | 520 | 515 |
| LTC4S     | 0.020036953 | 0.648491359 | 0.71709239 | 520 | 519 |
| ABCC8     | 0.020008062 | 0.648964215 | 0.71745789 | 520 | 212 |
| PRELID2   | 0.019982073 | 0.649389689 | 0.71788891 | 520 | 520 |
| BSDC1     | 0.019965064 | 0.649668206 | 0.71811806 | 520 | 520 |
| RBAK      | 0.019947108 | 0.649962299 | 0.71840376 | 520 | 520 |
| OR52B4    | 0.019939258 | 0.65009088  | 0.7185065  | 520 | 18  |
| PITPNM1   | 0.019932815 | 0.650196437 | 0.71854439 | 520 | 520 |
| KCNQ1DN   | 0.019914096 | 0.650503114 | 0.71882042 | 520 | 126 |
| FAM127C   | 0.019878212 | 0.651091191 | 0.71923031 | 520 | 520 |
| TMEM44    | 0.019851106 | 0.651535544 | 0.71962661 | 520 | 520 |
| NGFRAP1   | 0.019833422 | 0.651825522 | 0.71983185 | 520 | 520 |
| KLHL14    | 0.019799091 | 0.652388612 | 0.72033688 | 520 | 449 |
| ANKRD55   | 0.019796828 | 0.652425729 | 0.72033688 | 520 | 453 |
| C5orf47   | 0.019757289 | 0.65307449  | 0.72094745 | 520 | 223 |
| GAPVD1    | 0.019668423 | 0.654533581 | 0.72218961 | 520 | 520 |
| GDE1      | 0.019658683 | 0.654693576 | 0.7222871  | 520 | 520 |
| CPO       | 0.019648398 | 0.654862548 | 0.72243399 | 520 | 292 |
| PADI6     | 0.019643586 | 0.654941621 | 0.72248169 | 520 | 169 |
| CLLU1OS   | 0.019635889 | 0.65506808  | 0.72258166 | 520 | 382 |
| DALRD3    | 0.019625708 | 0.655235379 | 0.72272667 | 520 | 520 |
| MAGEA5    | 0.019610968 | 0.655477637 | 0.72295433 | 520 | 324 |
| C3orf27   | 0.019601103 | 0.655639779 | 0.72309361 | 520 | 63  |
| SNX3      | 0.0195457   | 0.65655073  | 0.72390031 | 520 | 520 |
| TAS2R13   | 0.01946131  | 0.657939262 | 0.725233   | 520 | 159 |
| ZNF763    | 0.019449465 | 0.658134256 | 0.72532899 | 520 | 518 |
| MSH4      | 0.019435204 | 0.658369042 | 0.72550844 | 520 | 249 |
| C4orf36   | 0.019410826 | 0.658770478 | 0.72591114 | 520 | 515 |
| CCDC116   | 0.019397803 | 0.658984974 | 0.72610782 | 520 | 502 |
| PNLIPRP3  | 0.019383268 | 0.659224398 | 0.72633194 | 520 | 475 |
| KIAA1530  | 0.019378456 | 0.659303661 | 0.72637958 | 520 | 520 |
| OR8K3     | 0.019352132 | 0.659737402 | 0.72677803 | 520 | 7   |
| LOC646498 | 0.019269081 | 0.661106538 | 0.72800788 | 520 | 27  |
| GDF15     | 0.019185112 | 0.662491973 | 0.72946721 | 520 | 520 |
| TSHB      | 0.019169689 | 0.662746573 | 0.72969433 | 520 | 17  |
| FLVCR2    | 0.019163684 | 0.6628457   | 0.72976362 | 520 | 520 |
| BAGE      | 0.019134535 | 0.663327013 | 0.73025365 | 520 | 97  |
| C4orf50   | 0.019116774 | 0.663620352 | 0.73047848 | 520 | 281 |
| ELAVL2    | 0.019102567 | 0.663855034 | 0.7306221  | 520 | 509 |
| AP3M1     | 0.019027629 | 0.665093434 | 0.73175883 | 520 | 520 |
| LOC91948  | 0.019014978 | 0.665302595 | 0.73194901 | 520 | 175 |
| PCDP1     | 0.019009325 | 0.665396071 | 0.73201191 | 520 | 292 |
| ITPK1     | 0.019007002 | 0.665434477 | 0.73201423 | 520 | 520 |
| PCDHB1    | 0.018989815 | 0.665718682 | 0.73224697 | 520 | 75  |
| IGHMBP2   | 0.018939525 | 0.666550583 | 0.73300207 | 520 | 520 |

|           |             |             |            |     |     |
|-----------|-------------|-------------|------------|-----|-----|
| CATSPERG  | 0.018933277 | 0.666653976 | 0.73307579 | 520 | 516 |
| AP1B1     | 0.018921698 | 0.66684558  | 0.73320651 | 520 | 520 |
| GABRG2    | 0.018910081 | 0.66703785  | 0.73337793 | 520 | 194 |
| KRTAP24-1 | 0.018905361 | 0.667115972 | 0.73340999 | 520 | 11  |
| ATP6AP1L  | 0.018871943 | 0.667669179 | 0.73395199 | 520 | 520 |
| ASB7      | 0.018869557 | 0.667708676 | 0.73395539 | 520 | 520 |
| CPLX4     | 0.018860749 | 0.667854533 | 0.7340757  | 520 | 148 |
| IFT80     | 0.018845467 | 0.668107604 | 0.73431384 | 520 | 520 |
| LY9       | 0.018836089 | 0.668262916 | 0.73444451 | 520 | 518 |
| GMEB1     | 0.018822993 | 0.66847984  | 0.73459507 | 520 | 520 |
| IKZF5     | 0.01881731  | 0.668573975 | 0.73462621 | 520 | 520 |
| CFC1B     | 0.018814965 | 0.668612818 | 0.73462886 | 520 | 16  |
| NEIL2     | 0.018809893 | 0.668696846 | 0.73467309 | 520 | 520 |
| STAG3L2   | 0.018805859 | 0.668763681 | 0.73467309 | 520 | 519 |
| PBX2      | 0.018803739 | 0.668798814 | 0.73467309 | 520 | 520 |
| HARBI1    | 0.018796045 | 0.668926281 | 0.73477309 | 520 | 520 |
| PHF8      | 0.018757038 | 0.669572723 | 0.73540304 | 520 | 520 |
| NEURL1B   | 0.018721646 | 0.670159464 | 0.73600738 | 520 | 520 |
| APIP      | 0.01870508  | 0.67043417  | 0.73622888 | 520 | 520 |
| IAPP      | 0.018699723 | 0.670523019 | 0.73628635 | 520 | 124 |
| FAM24A    | 0.018690284 | 0.670679564 | 0.73634587 | 520 | 5   |
| SIAE      | 0.018689849 | 0.670686781 | 0.73634587 | 520 | 520 |
| PABPC1P2  | 0.01868201  | 0.670816797 | 0.73641494 | 520 | 344 |
| UGT1A1    | 0.018634483 | 0.671605333 | 0.73715366 | 520 | 351 |
| C5orf54   | 0.018605867 | 0.672080291 | 0.73763482 | 520 | 520 |
| EN2       | 0.018575522 | 0.672584084 | 0.73810741 | 520 | 509 |
| PDYN      | 0.01856599  | 0.672742367 | 0.73824093 | 520 | 181 |
| OR4A15    | 0.018553028 | 0.672957623 | 0.73843696 | 520 | 7   |
| SERPINA13 | 0.018537434 | 0.673216627 | 0.73862739 | 520 | 38  |
| CR1L      | 0.018535963 | 0.673241063 | 0.73862739 | 520 | 383 |
| OCLM      | 0.018533128 | 0.673288159 | 0.73863887 | 520 | 455 |
| C9orf7    | 0.018507762 | 0.673709569 | 0.73902077 | 520 | 520 |
| MED21     | 0.018461312 | 0.674481527 | 0.73966637 | 520 | 520 |
| COX10     | 0.018399366 | 0.675511531 | 0.74063479 | 520 | 520 |
| DEFA6     | 0.018396746 | 0.675555105 | 0.7406423  | 520 | 23  |
| UNC93A    | 0.018351046 | 0.676315396 | 0.74139522 | 520 | 461 |
| HMX3      | 0.018347632 | 0.676372211 | 0.74141719 | 520 | 80  |
| VMAC      | 0.018316012 | 0.676898462 | 0.74191339 | 520 | 520 |
| CLRN1     | 0.018307876 | 0.677033899 | 0.74198117 | 520 | 46  |
| SLC17A6   | 0.018278161 | 0.67752863  | 0.74248301 | 520 | 60  |
| TBC1D14   | 0.018275749 | 0.677568795 | 0.74248667 | 520 | 520 |
| HNRNPA0   | 0.018253713 | 0.677935779 | 0.74280808 | 520 | 520 |
| LY6E      | 0.018230291 | 0.67832592  | 0.74319517 | 520 | 520 |
| SRP54     | 0.018220357 | 0.678491418 | 0.7433361  | 520 | 520 |
| CLDN19    | 0.018212706 | 0.678618889 | 0.74340881 | 520 | 401 |
| NAA11     | 0.018205894 | 0.678732404 | 0.74343855 | 520 | 78  |

|              |             |             |            |     |     |
|--------------|-------------|-------------|------------|-----|-----|
| CDCP1        | 0.018184111 | 0.679095398 | 0.74375534 | 520 | 520 |
| LOC100289341 | 0.018146516 | 0.679722074 | 0.7443204  | 520 | 520 |
| SNORA77      | 0.018137095 | 0.679879162 | 0.74445199 | 520 | 6   |
| BAMBI        | 0.018129542 | 0.680005105 | 0.74450904 | 520 | 520 |
| TRMT61B      | 0.018112494 | 0.6802894   | 0.74475786 | 520 | 520 |
| PMS2CL       | 0.018107316 | 0.680375745 | 0.74475786 | 520 | 520 |
| GPAA1        | 0.018107055 | 0.680380108 | 0.74475786 | 520 | 520 |
| WDR20        | 0.018092078 | 0.680629906 | 0.74490998 | 520 | 520 |
| ATP1A3       | 0.018086877 | 0.680716666 | 0.7449645  | 520 | 517 |
| COMMD9       | 0.018082737 | 0.680785735 | 0.74499965 | 520 | 520 |
| DCP2         | 0.018073307 | 0.680943048 | 0.74513136 | 520 | 520 |
| INO80D       | 0.018059131 | 0.68117957  | 0.74534973 | 520 | 520 |
| DBH          | 0.018032305 | 0.681627247 | 0.74578487 | 520 | 441 |
| C7orf13      | 0.018030868 | 0.681651221 | 0.74578487 | 520 | 520 |
| GGPS1        | 0.017984679 | 0.682422305 | 0.74650699 | 520 | 520 |
| CASC3        | 0.017966825 | 0.682720442 | 0.7467116  | 520 | 520 |
| PYHIN1       | 0.017946409 | 0.683061421 | 0.74704401 | 520 | 513 |
| JHDM1D       | 0.017927821 | 0.683371933 | 0.74730255 | 520 | 520 |
| HLA-A        | 0.017900107 | 0.683834972 | 0.7477278  | 520 | 520 |
| DIS3L        | 0.017893882 | 0.683939012 | 0.74776046 | 520 | 520 |
| C4orf22      | 0.017845238 | 0.684752099 | 0.74852767 | 520 | 88  |
| GATA5        | 0.017834809 | 0.684926471 | 0.74863711 | 520 | 303 |
| SPAG16       | 0.017808571 | 0.685365232 | 0.74907608 | 520 | 520 |
| WDR55        | 0.017803831 | 0.685444515 | 0.74910363 | 520 | 520 |
| TGIF1        | 0.017802621 | 0.68546474  | 0.74910363 | 520 | 520 |
| TSPY4        | 0.017792932 | 0.68562681  | 0.74924014 | 520 | 26  |
| DTHD1        | 0.017777546 | 0.685884183 | 0.74948077 | 520 | 488 |
| SLC39A11     | 0.017734749 | 0.686600291 | 0.75018197 | 520 | 520 |
| GPR150       | 0.017728313 | 0.68670801  | 0.75025901 | 520 | 344 |
| WDR69        | 0.017711078 | 0.686996492 | 0.75049286 | 520 | 277 |
| PYDC2        | 0.017630018 | 0.688353891 | 0.75173136 | 520 | 21  |
| RAB11B       | 0.017622178 | 0.688485234 | 0.75181467 | 520 | 520 |
| ZNF718       | 0.017605102 | 0.688771335 | 0.75206505 | 520 | 520 |
| NRN1         | 0.017601694 | 0.688828426 | 0.75207629 | 520 | 520 |
| NUB1         | 0.017528027 | 0.69006322  | 0.75306786 | 520 | 520 |
| GPX4         | 0.017514486 | 0.690290278 | 0.75327488 | 520 | 520 |
| LYZL2        | 0.017485686 | 0.690773304 | 0.75376118 | 520 | 16  |
| AQP7P3       | 0.017481403 | 0.690845159 | 0.7537988  | 520 | 225 |
| C6orf167     | 0.017460664 | 0.691193074 | 0.7540968  | 520 | 520 |
| TMEM202      | 0.017448722 | 0.691393441 | 0.7542746  | 520 | 69  |
| COQ10B       | 0.017445109 | 0.69145406  | 0.75428015 | 520 | 520 |
| TRPC7        | 0.01744396  | 0.691473349 | 0.75428015 | 520 | 53  |
| RAB40AL      | 0.0174252   | 0.691788167 | 0.75454193 | 520 | 500 |
| FRG2C        | 0.017422799 | 0.691828454 | 0.75454505 | 520 | 213 |
| ARRDC4       | 0.017419998 | 0.691875475 | 0.75455552 | 520 | 520 |
| OR9G4        | 0.017397569 | 0.692251953 | 0.75481241 | 520 | 7   |

|                     |             |             |            |     |     |
|---------------------|-------------|-------------|------------|-----|-----|
| CDV3                | 0.017390939 | 0.692363262 | 0.75484913 | 520 | 520 |
| LOC729991-<br>MEF2B | 0.017362034 | 0.692848581 | 0.75528998 | 520 | 520 |
| UBE2E3              | 0.01734408  | 0.693150094 | 0.75553697 | 520 | 520 |
| CAMK2N2             | 0.017336457 | 0.69327812  | 0.75561868 | 520 | 520 |
| C1orf163            | 0.017311414 | 0.693698809 | 0.75591956 | 520 | 520 |
| OR4L1               | 0.017309794 | 0.69372602  | 0.75591956 | 520 | 6   |
| OR4F15              | 0.017301683 | 0.693862293 | 0.75598634 | 520 | 14  |
| CCNT2               | 0.017243088 | 0.694847029 | 0.75696026 | 520 | 520 |
| EXOC8               | 0.017241794 | 0.694868795 | 0.75696026 | 520 | 520 |
| ZNF674              | 0.017221771 | 0.695205412 | 0.75716333 | 520 | 520 |
| SIKE1               | 0.017170946 | 0.696060158 | 0.75788957 | 520 | 520 |
| TFAM                | 0.017137176 | 0.69662829  | 0.75838532 | 520 | 520 |
| RNASE8              | 0.017116056 | 0.696983689 | 0.7586903  | 520 | 27  |
| NUP214              | 0.017099106 | 0.697268965 | 0.75891889 | 520 | 520 |
| LAMB4               | 0.017080867 | 0.697575986 | 0.7591711  | 520 | 499 |
| CIB2                | 0.017073329 | 0.697702886 | 0.75922725 | 520 | 520 |
| OR52A5              | 0.017060636 | 0.6979166   | 0.75941883 | 520 | 5   |
| UNC119B             | 0.017037946 | 0.698298684 | 0.75979283 | 520 | 520 |
| CD38                | 0.016992892 | 0.699057571 | 0.76049619 | 520 | 518 |
| APOA4               | 0.016987737 | 0.699144422 | 0.76054964 | 520 | 73  |
| SNORA71B            | 0.01695486  | 0.699698434 | 0.76107019 | 520 | 39  |
| INSIG1              | 0.016947494 | 0.699822572 | 0.76114089 | 520 | 520 |
| DDX47               | 0.016945736 | 0.699852205 | 0.76114089 | 520 | 520 |
| NOS1                | 0.0168732   | 0.701075148 | 0.76232093 | 520 | 484 |
| DSCR10              | 0.016864208 | 0.7012268   | 0.7624036  | 520 | 26  |
| C2orf74             | 0.016847316 | 0.701511723 | 0.76263114 | 520 | 520 |
| RMST                | 0.016837919 | 0.701670251 | 0.76276236 | 520 | 62  |
| KCNK12              | 0.016808396 | 0.702168383 | 0.76318043 | 520 | 401 |
| PPAT                | 0.016800771 | 0.702297053 | 0.76327913 | 520 | 520 |
| RALB                | 0.016789278 | 0.702491018 | 0.76341011 | 520 | 520 |
| LDLR                | 0.016787338 | 0.702523752 | 0.76341011 | 520 | 520 |
| LRMP                | 0.0167869   | 0.702531149 | 0.76341011 | 520 | 519 |
| VCY                 | 0.016777447 | 0.7026907   | 0.76354234 | 520 | 20  |
| REXO2               | 0.016727196 | 0.703539084 | 0.76417594 | 520 | 520 |
| HMHA1               | 0.016723482 | 0.703601801 | 0.76420289 | 520 | 520 |
| DMC1                | 0.016714943 | 0.703746014 | 0.76423603 | 520 | 516 |
| LCN15               | 0.01669724  | 0.704045001 | 0.76443721 | 520 | 41  |
| DYTN                | 0.016679538 | 0.704344025 | 0.76467953 | 520 | 35  |
| LOC285780           | 0.016673125 | 0.704452368 | 0.76472799 | 520 | 208 |
| NACC1               | 0.016667712 | 0.704543815 | 0.76473174 | 520 | 520 |
| LBX2                | 0.016663102 | 0.704621704 | 0.76473936 | 520 | 519 |
| STIM2               | 0.016646212 | 0.704907096 | 0.76500251 | 520 | 520 |
| LEUTX               | 0.016458385 | 0.708083608 | 0.76807778 | 520 | 40  |
| ZNF7                | 0.016429855 | 0.708566554 | 0.76853427 | 520 | 520 |
| OR2L3               | 0.016398148 | 0.7091034   | 0.76897714 | 520 | 62  |

|              |             |             |            |     |     |
|--------------|-------------|-------------|------------|-----|-----|
| DDX26B       | 0.01638452  | 0.709334204 | 0.7691567  | 520 | 518 |
| OR2M2        | 0.016383866 | 0.70934527  | 0.7691567  | 520 | 12  |
| CARD6        | 0.016377808 | 0.70944787  | 0.76920319 | 520 | 520 |
| PSMD5        | 0.01637683  | 0.709464434 | 0.76920319 | 520 | 520 |
| SNX15        | 0.016356369 | 0.709811026 | 0.76951767 | 520 | 520 |
| ASPDH        | 0.016328117 | 0.71028966  | 0.7699737  | 520 | 213 |
| GOLGA8F      | 0.016304663 | 0.71068712  | 0.77036314 | 520 | 84  |
| CYP2B7P1     | 0.016300108 | 0.710764311 | 0.7704054  | 520 | 434 |
| UGT8         | 0.01628194  | 0.711072241 | 0.77061489 | 520 | 490 |
| SNX33        | 0.016251713 | 0.711584674 | 0.77108735 | 520 | 520 |
| UBE2DNL      | 0.016243731 | 0.711720016 | 0.77119214 | 520 | 29  |
| CRELD2       | 0.016196349 | 0.712523592 | 0.77198032 | 520 | 520 |
| IWS1         | 0.016193216 | 0.712576749 | 0.77199643 | 520 | 520 |
| TP53INP1     | 0.016168281 | 0.712999769 | 0.77241322 | 520 | 520 |
| CD3E         | 0.01612701  | 0.713700115 | 0.77313039 | 520 | 520 |
| PCMTD2       | 0.016112926 | 0.713939177 | 0.77334781 | 520 | 520 |
| LOC100192379 | 0.016099242 | 0.714171474 | 0.77355789 | 520 | 115 |
| ABLIM2       | 0.016095015 | 0.71424323  | 0.77359405 | 520 | 520 |
| ACD          | 0.016019282 | 0.715529371 | 0.77482059 | 520 | 520 |
| PRAMEF2      | 0.015980689 | 0.716185088 | 0.77528083 | 520 | 56  |
| CCL5         | 0.015933801 | 0.716982031 | 0.77610187 | 520 | 520 |
| TREML2P1     | 0.015907183 | 0.717434579 | 0.77650837 | 520 | 3   |
| LOC728640    | 0.01589629  | 0.7176198   | 0.77662949 | 520 | 520 |
| GP1BA        | 0.015895185 | 0.717638592 | 0.77662949 | 520 | 472 |
| BARHL2       | 0.015840834 | 0.718563054 | 0.77734353 | 520 | 72  |
| KAAG1        | 0.015838578 | 0.718601428 | 0.77734353 | 520 | 230 |
| BMP10        | 0.015834617 | 0.718668816 | 0.77734353 | 520 | 98  |
| DNAH7        | 0.01581915  | 0.71893198  | 0.77755869 | 520 | 499 |
| RAB36        | 0.015807077 | 0.719137423 | 0.77764182 | 520 | 520 |
| SCGB3A2      | 0.015800531 | 0.719248835 | 0.77767888 | 520 | 209 |
| PRR20A       | 0.015757062 | 0.719988738 | 0.77839542 | 520 | 9   |
| SNORA74A     | 0.015753865 | 0.720043159 | 0.77841252 | 520 | 198 |
| DNAJB12      | 0.01571857  | 0.72064414  | 0.77897869 | 520 | 520 |
| VPS37C       | 0.015683973 | 0.721233393 | 0.77951663 | 520 | 520 |
| OR6C70       | 0.015682542 | 0.721257777 | 0.77951663 | 520 | 196 |
| HEMGN        | 0.015663091 | 0.721589146 | 0.77979118 | 520 | 222 |
| DEFA5        | 0.015615742 | 0.722396002 | 0.78045397 | 520 | 34  |
| RPS4Y1       | 0.015603751 | 0.72260039  | 0.78059114 | 520 | 493 |
| OR8B4        | 0.015600619 | 0.722653776 | 0.78060699 | 520 | 3   |
| CELF5        | 0.015588287 | 0.722863991 | 0.78077545 | 520 | 484 |
| DSTN         | 0.015578743 | 0.7230267   | 0.7808425  | 520 | 520 |
| NEDD4L       | 0.015575519 | 0.723081663 | 0.78086004 | 520 | 520 |
| NEK8         | 0.015572284 | 0.723136816 | 0.78087778 | 520 | 520 |
| WHSC1L1      | 0.015512926 | 0.724149107 | 0.78180343 | 520 | 520 |
| RAD1         | 0.015498812 | 0.724389871 | 0.78197962 | 520 | 520 |
| PIWIL3       | 0.015477414 | 0.724754949 | 0.78228996 | 520 | 72  |



|                |             |             |            |     |     |
|----------------|-------------|-------------|------------|-----|-----|
| MORC1          | 0.015472861 | 0.724832651 | 0.78229008 | 520 | 63  |
| CD79B          | 0.015466714 | 0.724937537 | 0.78236141 | 520 | 520 |
| OR2H2          | 0.015444085 | 0.725323713 | 0.78269439 | 520 | 216 |
| CHRNB3         | 0.015425855 | 0.725634886 | 0.78298827 | 520 | 84  |
| SYTL3          | 0.015409585 | 0.725912622 | 0.78324605 | 520 | 520 |
| PTPRQ          | 0.015385254 | 0.726328038 | 0.78361041 | 520 | 425 |
| NDRG3          | 0.015362944 | 0.726709033 | 0.78393756 | 520 | 520 |
| TUBA3C         | 0.015330477 | 0.727263578 | 0.78445184 | 520 | 197 |
| KLHL1          | 0.015316469 | 0.727502892 | 0.784668   | 520 | 58  |
| FAM41AY1       | 0.015298384 | 0.727811897 | 0.7849593  | 520 | 28  |
| DKFZP686I15217 | 0.015246534 | 0.72869804  | 0.78583096 | 520 | 520 |
| MTRF1L         | 0.015184054 | 0.729766342 | 0.78689885 | 520 | 520 |
| OR2AK2         | 0.015157466 | 0.730221116 | 0.78730628 | 520 | 23  |
| GPR27          | 0.015125452 | 0.730768803 | 0.7878534  | 520 | 400 |
| LRRRC61        | 0.015114557 | 0.73095523  | 0.78801226 | 520 | 520 |
| DHDDS          | 0.015088857 | 0.731395046 | 0.78835996 | 520 | 520 |
| GABRG3         | 0.015060546 | 0.731879662 | 0.78875583 | 520 | 187 |
| HHLA1          | 0.015046077 | 0.732127359 | 0.78892045 | 520 | 241 |
| UNC93B1        | 0.01503982  | 0.732234498 | 0.78895547 | 520 | 520 |
| ZNF428         | 0.015012406 | 0.732703909 | 0.78929108 | 520 | 520 |
| TRPM1          | 0.015010964 | 0.732728613 | 0.78929108 | 520 | 332 |
| CCDC67         | 0.01494942  | 0.733782839 | 0.79034224 | 520 | 339 |
| SLC30A3        | 0.014930157 | 0.734112916 | 0.79057108 | 520 | 504 |
| EMP1           | 0.014910998 | 0.734441239 | 0.79084018 | 520 | 520 |
| PHF23          | 0.01487733  | 0.735018355 | 0.79129258 | 520 | 520 |
| LETM2          | 0.014852632 | 0.735441788 | 0.79170617 | 520 | 520 |
| CXCR2P1        | 0.014835373 | 0.735737742 | 0.79189793 | 520 | 498 |
| SLC5A6         | 0.014824735 | 0.735920179 | 0.79205201 | 520 | 520 |
| ALG10B         | 0.014788402 | 0.736543378 | 0.79251124 | 520 | 520 |
| TMEM196        | 0.014759762 | 0.737034758 | 0.79291303 | 520 | 58  |
| NUDT16P1       | 0.014756978 | 0.737082526 | 0.79292211 | 520 | 518 |
| PLCD4          | 0.01472945  | 0.737554925 | 0.79334565 | 520 | 520 |
| C14orf126      | 0.014709588 | 0.737895832 | 0.79362767 | 520 | 520 |
| CTSD           | 0.014694841 | 0.738148983 | 0.79373059 | 520 | 520 |
| CYB5D2         | 0.014674028 | 0.738506306 | 0.79403014 | 520 | 520 |
| COCH           | 0.014661088 | 0.738728499 | 0.794142   | 520 | 518 |
| STAG3L1        | 0.014652044 | 0.738883806 | 0.79426661 | 520 | 518 |
| C6orf58        | 0.014618938 | 0.739452397 | 0.79470412 | 520 | 292 |
| NCLN           | 0.014616872 | 0.739487873 | 0.79470412 | 520 | 520 |
| C20orf201      | 0.014575738 | 0.74019456  | 0.79534883 | 520 | 340 |
| DHX30          | 0.014575065 | 0.740206119 | 0.79534883 | 520 | 520 |
| DMBX1          | 0.014567609 | 0.740334247 | 0.79544412 | 520 | 458 |
| YPEL1          | 0.014563387 | 0.740406791 | 0.79547967 | 520 | 520 |
| PRG1           | 0.014511708 | 0.741295024 | 0.79626427 | 520 | 367 |
| VSIG1          | 0.01450252  | 0.741452979 | 0.79639151 | 520 | 519 |
| AQR            | 0.014487126 | 0.741717655 | 0.79663336 | 520 | 520 |

|              |             |             |            |     |     |
|--------------|-------------|-------------|------------|-----|-----|
| NXPH1        | 0.014471947 | 0.741978651 | 0.79678636 | 520 | 205 |
| TFCP2        | 0.014451056 | 0.742337924 | 0.79712972 | 520 | 520 |
| GTF2IRD2B    | 0.014414798 | 0.742961588 | 0.79771446 | 520 | 520 |
| LOC728190    | 0.014409597 | 0.743051063 | 0.79776804 | 520 | 520 |
| GTF2H1       | 0.014395668 | 0.743290708 | 0.79794036 | 520 | 520 |
| SKP2         | 0.014371928 | 0.743699213 | 0.79824309 | 520 | 520 |
| RBMV2FP      | 0.014364213 | 0.743831983 | 0.79830893 | 520 | 7   |
| BANK1        | 0.01430597  | 0.744834545 | 0.7991976  | 520 | 518 |
| C4orf48      | 0.014302492 | 0.744894432 | 0.7991976  | 520 | 520 |
| ZNF862       | 0.014302295 | 0.744897821 | 0.7991976  | 520 | 520 |
| GDAP1        | 0.014291335 | 0.74508652  | 0.79931499 | 520 | 520 |
| LEMD2        | 0.014274653 | 0.745373797 | 0.7995381  | 520 | 520 |
| CCDC27       | 0.014268464 | 0.745480373 | 0.79960989 | 520 | 73  |
| ERAP2        | 0.01422051  | 0.746306382 | 0.80034116 | 520 | 520 |
| CDKAL1       | 0.014187036 | 0.746883151 | 0.80077375 | 520 | 520 |
| CTSL2        | 0.014158583 | 0.747373501 | 0.80121427 | 520 | 520 |
| SPAG11A      | 0.014155643 | 0.747424181 | 0.80122601 | 520 | 35  |
| ZNF345       | 0.014131573 | 0.747839086 | 0.80162816 | 520 | 518 |
| TMEM229B     | 0.014122068 | 0.748002955 | 0.80176119 | 520 | 520 |
| KLHL10       | 0.014079388 | 0.748738893 | 0.80246471 | 520 | 362 |
| PDILT        | 0.014043424 | 0.749359189 | 0.80300147 | 520 | 11  |
| CHGA         | 0.014009052 | 0.749952192 | 0.80359422 | 520 | 394 |
| CLPTM1       | 0.013987271 | 0.750328035 | 0.80395422 | 520 | 520 |
| LOC648691    | 0.013984603 | 0.750374081 | 0.80396084 | 520 | 141 |
| KPNA1        | 0.013976996 | 0.750505366 | 0.80404982 | 520 | 520 |
| COL29A1      | 0.013972829 | 0.750577293 | 0.80405039 | 520 | 451 |
| AP3M2        | 0.013967421 | 0.750670617 | 0.80406573 | 520 | 520 |
| CXorf49B     | 0.013967378 | 0.750671363 | 0.80406573 | 520 | 462 |
| AGPAT6       | 0.013951953 | 0.750937613 | 0.80426547 | 520 | 520 |
| LOC100286793 | 0.013924114 | 0.751418204 | 0.80473745 | 520 | 520 |
| SNTG2        | 0.013891995 | 0.751972808 | 0.80516035 | 520 | 415 |
| SPHK2        | 0.013879002 | 0.752197193 | 0.80531508 | 520 | 520 |
| MRGPRX4      | 0.013830971 | 0.753026865 | 0.80612018 | 520 | 183 |
| PEX6         | 0.013824992 | 0.753130174 | 0.80618553 | 520 | 520 |
| CKLF         | 0.013770942 | 0.754064184 | 0.80714249 | 520 | 520 |
| LOC152225    | 0.013767862 | 0.754117426 | 0.80715663 | 520 | 485 |
| VAX1         | 0.01372522  | 0.754854572 | 0.80783525 | 520 | 405 |
| HPVC1        | 0.013657614 | 0.756023745 | 0.80902525 | 520 | 16  |
| FLJ37201     | 0.013645693 | 0.756229953 | 0.80920297 | 520 | 511 |
| CA5A         | 0.013616607 | 0.756733177 | 0.80965551 | 520 | 75  |
| CIRH1A       | 0.013608283 | 0.756877206 | 0.80976665 | 520 | 520 |
| KLHL18       | 0.013586763 | 0.757249619 | 0.81010943 | 520 | 520 |
| ATP1B1       | 0.013550429 | 0.75787851  | 0.81066587 | 520 | 520 |
| SPRYD5       | 0.013540192 | 0.758055733 | 0.81081242 | 520 | 63  |
| C12orf11     | 0.013530503 | 0.758223481 | 0.81094822 | 520 | 520 |
| BDKRB1       | 0.013524701 | 0.758323919 | 0.81094822 | 520 | 520 |

|           |             |             |            |     |     |
|-----------|-------------|-------------|------------|-----|-----|
| CCDC33    | 0.013523216 | 0.758349642 | 0.81094822 | 520 | 210 |
| HIST1H4L  | 0.013520273 | 0.758400596 | 0.81094822 | 520 | 159 |
| FAM53A    | 0.013467254 | 0.759318756 | 0.81168973 | 520 | 520 |
| CSH1      | 0.013463474 | 0.759384244 | 0.8117167  | 520 | 14  |
| LOC730668 | 0.013438178 | 0.759822432 | 0.81209899 | 520 | 474 |
| RNASE11   | 0.013428469 | 0.75999065  | 0.81220578 | 520 | 23  |
| FRK       | 0.013425436 | 0.760043193 | 0.81220578 | 520 | 520 |
| CNTFR     | 0.013421889 | 0.760104645 | 0.81222841 | 520 | 508 |
| OR4A47    | 0.013413559 | 0.760248989 | 0.81229656 | 520 | 12  |
| MCTP2     | 0.013402746 | 0.760436349 | 0.81245369 | 520 | 520 |
| VPS18     | 0.013339538 | 0.761531912 | 0.81345179 | 520 | 520 |
| TSPAN16   | 0.013317071 | 0.761921424 | 0.81365235 | 520 | 72  |
| LOC653566 | 0.013290617 | 0.762380152 | 0.81401289 | 520 | 520 |
| BEX1      | 0.013277731 | 0.762603638 | 0.8142084  | 520 | 415 |
| PHF14     | 0.013214905 | 0.763693496 | 0.81515619 | 520 | 520 |
| WFDC13    | 0.013196812 | 0.764007448 | 0.81544814 | 520 | 86  |
| FAM186B   | 0.013165762 | 0.764546326 | 0.81585056 | 520 | 519 |
| TBC1D4    | 0.01316341  | 0.764587157 | 0.81585095 | 520 | 520 |
| LOC340094 | 0.013152622 | 0.764774412 | 0.8159644  | 520 | 11  |
| CASP7     | 0.013118157 | 0.765372738 | 0.81655957 | 520 | 520 |
| MSRB2     | 0.013077063 | 0.766086321 | 0.81719116 | 520 | 520 |
| LOC401387 | 0.013057371 | 0.766428342 | 0.81751275 | 520 | 338 |
| OR52N5    | 0.013053369 | 0.766497862 | 0.81751903 | 520 | 16  |
| CSN2      | 0.013039244 | 0.766743228 | 0.81767561 | 520 | 85  |
| C4orf35   | 0.013026171 | 0.766970341 | 0.81777188 | 520 | 78  |
| NLRP6     | 0.01302471  | 0.76699572  | 0.81777188 | 520 | 484 |
| SART1     | 0.012988106 | 0.767631724 | 0.81836344 | 520 | 520 |
| CXorf61   | 0.012977214 | 0.767821022 | 0.81852197 | 520 | 130 |
| ZC3H4     | 0.012952708 | 0.768246936 | 0.81887369 | 520 | 520 |
| SLC6A3    | 0.012922703 | 0.768768531 | 0.81908179 | 520 | 378 |
| EFTUD1    | 0.012921296 | 0.768792999 | 0.81908179 | 520 | 520 |
| PWWP2A    | 0.01287161  | 0.769656954 | 0.81991562 | 520 | 520 |
| PNLIPRP2  | 0.012862702 | 0.76981188  | 0.82003734 | 520 | 28  |
| LOC285205 | 0.012807878 | 0.770765572 | 0.82071832 | 520 | 369 |
| ALDH7A1   | 0.012807352 | 0.770774722 | 0.82071832 | 520 | 520 |
| ZNF137    | 0.012807234 | 0.77077677  | 0.82071832 | 520 | 517 |
| BBOX1     | 0.012779577 | 0.771258015 | 0.82114402 | 520 | 517 |
| AGGF1     | 0.012754321 | 0.771697544 | 0.82152522 | 520 | 520 |
| CPT1A     | 0.01274016  | 0.771944029 | 0.82174424 | 520 | 520 |
| OTC       | 0.01273071  | 0.77210852  | 0.82183257 | 520 | 78  |
| SSX8      | 0.012727657 | 0.772161665 | 0.82184575 | 520 | 30  |
| TARM1     | 0.012683919 | 0.772923154 | 0.82252599 | 520 | 23  |
| CRYBA4    | 0.012678058 | 0.773025206 | 0.82259118 | 520 | 266 |
| LACRT     | 0.012656511 | 0.773400444 | 0.82294705 | 520 | 5   |
| DNM1P35   | 0.012636831 | 0.773743213 | 0.82318146 | 520 | 519 |
| TCFL5     | 0.012631909 | 0.77382895  | 0.82322924 | 520 | 520 |

|           |             |             |            |     |     |
|-----------|-------------|-------------|------------|-----|-----|
| NUP205    | 0.012603025 | 0.774332106 | 0.8236776  | 520 | 520 |
| OR4N2     | 0.012584543 | 0.77465412  | 0.8239332  | 520 | 55  |
| VAPB      | 0.012512609 | 0.775907797 | 0.8252231  | 520 | 520 |
| PURB      | 0.012508892 | 0.7759726   | 0.8252485  | 520 | 520 |
| TMEM105   | 0.012495976 | 0.77619777  | 0.82544443 | 520 | 501 |
| SLC47A1   | 0.012458148 | 0.776857343 | 0.8259676  | 520 | 520 |
| KDM3A     | 0.012456015 | 0.776894536 | 0.8259676  | 520 | 520 |
| C5orf35   | 0.012426787 | 0.777404268 | 0.82636476 | 520 | 519 |
| AGTRAP    | 0.012425922 | 0.777419353 | 0.82636476 | 520 | 520 |
| CRH       | 0.012414475 | 0.777619026 | 0.82646399 | 520 | 38  |
| PCSK2     | 0.01237512  | 0.778305594 | 0.82688504 | 520 | 323 |
| STRN4     | 0.012336955 | 0.778971552 | 0.82743415 | 520 | 520 |
| NAT2      | 0.01229272  | 0.779743646 | 0.82803617 | 520 | 250 |
| UPF0639   | 0.012157264 | 0.782109272 | 0.83019853 | 520 | 415 |
| MALT1     | 0.012148085 | 0.78226965  | 0.83028136 | 520 | 520 |
| BSX       | 0.012094949 | 0.783198231 | 0.83113568 | 520 | 18  |
| TSPY1     | 0.01203497  | 0.784246762 | 0.83211676 | 520 | 29  |
| ACACA     | 0.012032623 | 0.784287796 | 0.83211676 | 520 | 520 |
| ZNF716    | 0.01202965  | 0.78433978  | 0.83212813 | 520 | 90  |
| ZCCHC3    | 0.012019367 | 0.784519606 | 0.83227513 | 520 | 520 |
| ST7OT4    | 0.01199265  | 0.784986825 | 0.83258948 | 520 | 342 |
| TM2D3     | 0.011990665 | 0.785021546 | 0.83258948 | 520 | 520 |
| PARG      | 0.011990617 | 0.785022376 | 0.83258948 | 520 | 520 |
| ALKBH1    | 0.011985095 | 0.785118973 | 0.83261859 | 520 | 520 |
| FXD2      | 0.011984326 | 0.785132408 | 0.83261859 | 520 | 505 |
| GPRC6A    | 0.011970294 | 0.785377855 | 0.83283508 | 520 | 138 |
| POC5      | 0.011967824 | 0.785421054 | 0.83283709 | 520 | 520 |
| C3orf79   | 0.011934917 | 0.785996738 | 0.83337404 | 520 | 107 |
| UBAP2     | 0.011928209 | 0.786114094 | 0.83344049 | 520 | 520 |
| MAP1D     | 0.011879108 | 0.786973316 | 0.83430757 | 520 | 520 |
| NKX3-1    | 0.011843322 | 0.787599714 | 0.83479608 | 520 | 520 |
| AGXT2L1   | 0.011834021 | 0.787762539 | 0.83492477 | 520 | 176 |
| ZC3HAV1   | 0.011760002 | 0.789058645 | 0.83619073 | 520 | 520 |
| SCN10A    | 0.011714584 | 0.789854236 | 0.8368338  | 520 | 70  |
| OR5T2     | 0.011675061 | 0.790546742 | 0.83747948 | 520 | 19  |
| ACO2      | 0.011652298 | 0.790945649 | 0.83784437 | 520 | 520 |
| LBR       | 0.011650664 | 0.790974285 | 0.83784437 | 520 | 520 |
| SYNE2     | 0.01164367  | 0.791096864 | 0.83786007 | 520 | 520 |
| ABCA10    | 0.011642706 | 0.791113761 | 0.83786007 | 520 | 516 |
| ABCC11    | 0.011637233 | 0.79120969  | 0.83791766 | 520 | 508 |
| LOC285735 | 0.011613331 | 0.791628654 | 0.83822928 | 520 | 76  |
| RGS20     | 0.011607751 | 0.79172649  | 0.83828885 | 520 | 520 |
| HSP90AA1  | 0.011594319 | 0.791961966 | 0.83845012 | 520 | 520 |
| REG1A     | 0.011579227 | 0.792226569 | 0.8386422  | 520 | 173 |
| SLC25A42  | 0.011553701 | 0.79267417  | 0.83898388 | 520 | 520 |
| VWC2      | 0.011524192 | 0.793191693 | 0.83944352 | 520 | 321 |

|           |             |             |            |     |     |
|-----------|-------------|-------------|------------|-----|-----|
| HTRA2     | 0.011505293 | 0.793523175 | 0.83970618 | 520 | 520 |
| USP19     | 0.011468221 | 0.794173538 | 0.84026091 | 520 | 520 |
| IQCF5     | 0.011465911 | 0.794214076 | 0.84026091 | 520 | 15  |
| ARL5B     | 0.011459832 | 0.794320737 | 0.84028558 | 520 | 520 |
| LRRC16A   | 0.011449802 | 0.794496732 | 0.84038358 | 520 | 520 |
| DNAJC15   | 0.011430639 | 0.794832995 | 0.84069516 | 520 | 520 |
| ARID3B    | 0.011417947 | 0.795055743 | 0.84084255 | 520 | 520 |
| SULT4A1   | 0.011386839 | 0.795601746 | 0.84133174 | 520 | 416 |
| BCKDHB    | 0.011349716 | 0.796253459 | 0.84184431 | 520 | 520 |
| FRMPD1    | 0.011282314 | 0.797437108 | 0.84278641 | 520 | 478 |
| YPEL5     | 0.011268149 | 0.797685915 | 0.842961   | 520 | 520 |
| PHKA2     | 0.011265106 | 0.797739368 | 0.84297331 | 520 | 520 |
| MAGEB10   | 0.011250165 | 0.798001829 | 0.84320646 | 520 | 35  |
| FAM83G    | 0.011222852 | 0.798481696 | 0.84358089 | 520 | 520 |
| PCDHA9    | 0.011211491 | 0.798681323 | 0.84374759 | 520 | 155 |
| SLC28A3   | 0.011204721 | 0.798800288 | 0.84378485 | 520 | 517 |
| ATIC      | 0.011198672 | 0.798906569 | 0.84385291 | 520 | 520 |
| LOC441601 | 0.011187243 | 0.799107422 | 0.84402085 | 520 | 238 |
| ERGIC3    | 0.011166509 | 0.799471824 | 0.84431728 | 520 | 520 |
| OR2A12    | 0.011122661 | 0.800242607 | 0.84492645 | 520 | 17  |
| EPHA7     | 0.011121776 | 0.800258152 | 0.84492645 | 520 | 461 |
| SPAG1     | 0.011112157 | 0.800427271 | 0.84506076 | 520 | 520 |
| DCPS      | 0.011072883 | 0.801117855 | 0.84552423 | 520 | 520 |
| IQCF3     | 0.011066124 | 0.801236713 | 0.84560542 | 520 | 11  |
| LCLAT1    | 0.011049688 | 0.801525777 | 0.84586621 | 520 | 520 |
| SUMF1     | 0.011034985 | 0.801784384 | 0.84606177 | 520 | 520 |
| EIF4G1    | 0.011027731 | 0.801911981 | 0.84614093 | 520 | 520 |
| ARL6      | 0.010966828 | 0.802983452 | 0.8471653  | 520 | 520 |
| TEX9      | 0.010939893 | 0.803457446 | 0.84746875 | 520 | 518 |
| HSFYL1    | 0.010909087 | 0.803999642 | 0.84781136 | 520 | 13  |
| USP18     | 0.010844662 | 0.805133847 | 0.84874106 | 520 | 520 |
| GCKR      | 0.010837875 | 0.805253357 | 0.84882266 | 520 | 433 |
| CPSF7     | 0.010784692 | 0.80618999  | 0.84972113 | 520 | 520 |
| ANKS1A    | 0.010780302 | 0.806267327 | 0.84975823 | 520 | 520 |
| CPLX2     | 0.010776746 | 0.806329966 | 0.84976568 | 520 | 233 |
| SLC4A10   | 0.010739702 | 0.806982554 | 0.85033522 | 520 | 339 |
| MYL6B     | 0.010725836 | 0.80722686  | 0.85054723 | 520 | 520 |
| PFKFB4    | 0.010713303 | 0.807447706 | 0.85060214 | 520 | 520 |
| HNRNPR    | 0.010706305 | 0.807571015 | 0.85064316 | 520 | 520 |
| CECR7     | 0.010702809 | 0.807632621 | 0.85066361 | 520 | 507 |
| SNORA5C   | 0.010673796 | 0.808143943 | 0.85113999 | 520 | 55  |
| EEF2K     | 0.010672355 | 0.808169324 | 0.85113999 | 520 | 520 |
| XYLB      | 0.010622757 | 0.809043629 | 0.85188281 | 520 | 520 |
| FAM129A   | 0.010601618 | 0.809416324 | 0.85223073 | 520 | 520 |
| G6PC2     | 0.010595553 | 0.809523264 | 0.85225433 | 520 | 62  |
| PRR4      | 0.010558818 | 0.810171054 | 0.85272235 | 520 | 520 |

|              |             |             |            |     |     |
|--------------|-------------|-------------|------------|-----|-----|
| ALX1         | 0.010556256 | 0.810216242 | 0.85272235 | 520 | 390 |
| FAM47C       | 0.01055439  | 0.810249159 | 0.85272235 | 520 | 51  |
| MED20        | 0.010553557 | 0.810263851 | 0.85272235 | 520 | 520 |
| LOC154822    | 0.010548462 | 0.810353711 | 0.85273014 | 520 | 357 |
| GPR139       | 0.010528432 | 0.810707002 | 0.85296614 | 520 | 8   |
| TMEM39B      | 0.010514638 | 0.810950312 | 0.85317761 | 520 | 520 |
| OR1J1        | 0.010478946 | 0.811579995 | 0.85369323 | 520 | 219 |
| ASAH2        | 0.010471655 | 0.811708635 | 0.85375269 | 520 | 509 |
| PABPC1L2A    | 0.01046835  | 0.811766961 | 0.85376951 | 520 | 40  |
| AMZ2P1       | 0.01045944  | 0.811924178 | 0.85389032 | 520 | 520 |
| PCYT1A       | 0.010440007 | 0.812267107 | 0.85416187 | 520 | 520 |
| WASL         | 0.010361324 | 0.813655956 | 0.85539931 | 520 | 520 |
| LOC91149     | 0.010317516 | 0.814429472 | 0.85612323 | 520 | 240 |
| KRTAP13-3    | 0.010296741 | 0.814796358 | 0.85637497 | 520 | 5   |
| OR4F4        | 0.010262845 | 0.815395045 | 0.85695954 | 520 | 16  |
| FLJ46361     | 0.010258838 | 0.815465826 | 0.85698926 | 520 | 36  |
| LAP3         | 0.01022192  | 0.816118027 | 0.85756234 | 520 | 520 |
| LOC100124692 | 0.010211144 | 0.816308423 | 0.85761552 | 520 | 191 |
| CLEC3A       | 0.010210823 | 0.816314094 | 0.85761552 | 520 | 57  |
| UBE2O        | 0.010210662 | 0.816316936 | 0.85761552 | 520 | 520 |
| LRP2         | 0.010184594 | 0.816777575 | 0.85796536 | 520 | 432 |
| ORC3L        | 0.010162169 | 0.817173872 | 0.85829222 | 520 | 520 |
| CST6         | 0.010127932 | 0.817779021 | 0.85882321 | 520 | 519 |
| MED29        | 0.010126338 | 0.817807201 | 0.85882321 | 520 | 520 |
| C13orf26     | 0.010118924 | 0.817938249 | 0.85891609 | 520 | 83  |
| DMRTC1B      | 0.010108973 | 0.818114171 | 0.85905609 | 520 | 403 |
| NCRNA00167   | 0.010076939 | 0.818680518 | 0.85960602 | 520 | 388 |
| TNFRSF11A    | 0.01002605  | 0.819580434 | 0.86025938 | 520 | 520 |
| DHCR7        | 0.010025471 | 0.819590672 | 0.86025938 | 520 | 520 |
| TMEM56       | 0.00998455  | 0.820314481 | 0.86091819 | 520 | 518 |
| FHDC1        | 0.00996464  | 0.820666713 | 0.86119821 | 520 | 520 |
| FIGLA        | 0.009948919 | 0.820944849 | 0.86144525 | 520 | 54  |
| PPAN-P2RY11  | 0.009866733 | 0.822399284 | 0.86279551 | 520 | 156 |
| MGC21881     | 0.009812883 | 0.823352577 | 0.86370208 | 520 | 520 |
| BID          | 0.009734953 | 0.82473264  | 0.86487981 | 520 | 520 |
| RSRC1        | 0.009712361 | 0.825132824 | 0.86520464 | 520 | 520 |
| PTDSS2       | 0.009706624 | 0.825234453 | 0.86521794 | 520 | 520 |
| ENTPD3       | 0.009702896 | 0.825300489 | 0.86521794 | 520 | 519 |
| PI4KAP1      | 0.009699794 | 0.825355444 | 0.86521794 | 520 | 520 |
| ALS2CR11     | 0.009693519 | 0.825466608 | 0.86528949 | 520 | 433 |
| PDZD4        | 0.00967446  | 0.825804281 | 0.86555346 | 520 | 520 |
| NAA30        | 0.009670454 | 0.825875247 | 0.86558285 | 520 | 520 |
| GLYATL3      | 0.009642655 | 0.826367829 | 0.86600909 | 520 | 113 |
| TRAPPC10     | 0.009624077 | 0.826697064 | 0.86626903 | 520 | 520 |
| PCGF6        | 0.00962381  | 0.826701793 | 0.86626903 | 520 | 520 |
| SENP3        | 0.009620868 | 0.826753922 | 0.86627864 | 520 | 520 |

|           |             |             |            |     |     |
|-----------|-------------|-------------|------------|-----|-----|
| NRCAM     | 0.009597184 | 0.82717369  | 0.86667344 | 520 | 520 |
| DEFB132   | 0.009523462 | 0.828480615 | 0.86768208 | 520 | 19  |
| DNMT3B    | 0.00951722  | 0.828591297 | 0.86770786 | 520 | 520 |
| C7orf28A  | 0.009493809 | 0.829006423 | 0.86791721 | 520 | 520 |
| OR10K1    | 0.009311056 | 0.83224874  | 0.87094995 | 520 | 22  |
| GCA       | 0.009267986 | 0.833013274 | 0.87161432 | 520 | 520 |
| PRO0611   | 0.009259431 | 0.833165158 | 0.87172801 | 520 | 251 |
| KLHDC2    | 0.009207712 | 0.834083474 | 0.87259828 | 520 | 520 |
| PLA2G12B  | 0.009174097 | 0.83468046  | 0.87313223 | 520 | 84  |
| KRTAP10-2 | 0.00916286  | 0.834880035 | 0.87329569 | 520 | 159 |
| LOC283663 | 0.009156057 | 0.835000875 | 0.87337678 | 520 | 518 |
| SHPK      | 0.009133448 | 0.835402478 | 0.87375152 | 520 | 520 |
| COX8C     | 0.009127298 | 0.835511735 | 0.87382047 | 520 | 108 |
| AGK       | 0.00912038  | 0.835634641 | 0.87390368 | 520 | 520 |
| CCDC99    | 0.009113516 | 0.835756575 | 0.87395365 | 520 | 520 |
| HIST3H3   | 0.009112811 | 0.835769109 | 0.87395365 | 520 | 85  |
| FLJ46111  | 0.009070897 | 0.83651382  | 0.87464167 | 520 | 462 |
| OSR1      | 0.009057858 | 0.836745525 | 0.87479322 | 520 | 516 |
| CIITA     | 0.009054095 | 0.836812402 | 0.87481778 | 520 | 520 |
| TADA2B    | 0.009046336 | 0.836950279 | 0.87489012 | 520 | 520 |
| PTER      | 0.009042603 | 0.837016621 | 0.87489012 | 520 | 520 |
| SLCO1A2   | 0.009040027 | 0.837062401 | 0.87489012 | 520 | 427 |
| ABHD4     | 0.00903975  | 0.837067334 | 0.87489012 | 520 | 520 |
| FLT3LG    | 0.009037993 | 0.83709855  | 0.87489012 | 520 | 520 |
| C8orf56   | 0.009019105 | 0.837434257 | 0.87515026 | 520 | 235 |
| VSTM2A    | 0.00898795  | 0.837988031 | 0.87545675 | 520 | 113 |
| GSPT1     | 0.008984726 | 0.838045352 | 0.87547127 | 520 | 520 |
| FAHD2B    | 0.008975851 | 0.838203123 | 0.87559073 | 520 | 520 |
| SCARNA5   | 0.008961419 | 0.838459686 | 0.87576799 | 520 | 230 |
| GPR137    | 0.008872408 | 0.840042503 | 0.87723948 | 520 | 520 |
| TMEM31    | 0.008853908 | 0.840371552 | 0.87753765 | 520 | 323 |
| TP53RK    | 0.008840949 | 0.840602067 | 0.87768745 | 520 | 520 |
| ZNF434    | 0.008801216 | 0.841308915 | 0.87824358 | 520 | 520 |
| ZNF419    | 0.008775937 | 0.841758695 | 0.87862213 | 520 | 520 |
| PIM2      | 0.008756947 | 0.842096612 | 0.87883837 | 520 | 520 |
| ALG2      | 0.008751293 | 0.842197237 | 0.87889789 | 520 | 520 |
| DCUN1D5   | 0.008737708 | 0.842438987 | 0.87905919 | 520 | 520 |
| BAT3      | 0.008731432 | 0.842550681 | 0.87913024 | 520 | 520 |
| FLJ25363  | 0.008706212 | 0.842999553 | 0.87946208 | 520 | 47  |
| TMEM207   | 0.008685612 | 0.843366236 | 0.87975358 | 520 | 26  |
| PTPN4     | 0.00862622  | 0.844423615 | 0.8807199  | 520 | 520 |
| AMICA1    | 0.008614599 | 0.844630542 | 0.88089015 | 520 | 520 |
| C3orf14   | 0.008575577 | 0.845325447 | 0.88150286 | 520 | 519 |
| MAD1L1    | 0.008574244 | 0.845349177 | 0.88150286 | 520 | 520 |
| SSX1      | 0.008548027 | 0.845816121 | 0.88189856 | 520 | 194 |
| OR5K3     | 0.008518672 | 0.846339024 | 0.88226129 | 520 | 8   |

|           |             |             |            |     |     |
|-----------|-------------|-------------|------------|-----|-----|
| XRCC2     | 0.008476937 | 0.847082561 | 0.88294509 | 520 | 520 |
| AVP       | 0.008463504 | 0.847321911 | 0.88314892 | 520 | 19  |
| PRM1      | 0.00845099  | 0.847544909 | 0.88323778 | 520 | 8   |
| KLF14     | 0.008449577 | 0.847570083 | 0.88323778 | 520 | 481 |
| CCDC107   | 0.008407843 | 0.848313834 | 0.88395433 | 520 | 520 |
| GAGE12J   | 0.008339414 | 0.8495336   | 0.88503024 | 520 | 109 |
| EARS2     | 0.008337606 | 0.849565822 | 0.88503024 | 520 | 520 |
| ZNF577    | 0.008328569 | 0.849726952 | 0.88510664 | 520 | 520 |
| INTU      | 0.008308682 | 0.850081522 | 0.88535784 | 520 | 520 |
| GNASAS    | 0.008306462 | 0.850121104 | 0.88535784 | 520 | 335 |
| ENPP5     | 0.008305192 | 0.850143751 | 0.88535784 | 520 | 498 |
| PION      | 0.008255621 | 0.851027731 | 0.8859124  | 520 | 520 |
| CYCSP52   | 0.008187458 | 0.852243547 | 0.88704067 | 520 | 115 |
| CLU       | 0.008156949 | 0.852787854 | 0.88743678 | 520 | 520 |
| OR4N5     | 0.008156259 | 0.852800159 | 0.88743678 | 520 | 6   |
| EEF1A1P9  | 0.008120939 | 0.853430393 | 0.88790932 | 520 | 520 |
| THAP2     | 0.008100097 | 0.853802323 | 0.88825044 | 520 | 520 |
| HPX       | 0.008097285 | 0.853852504 | 0.88825682 | 520 | 492 |
| ANXA8L1   | 0.008093303 | 0.853923572 | 0.88828492 | 520 | 407 |
| LRRC52    | 0.008071117 | 0.854319535 | 0.88865097 | 520 | 47  |
| KCTD14    | 0.008062872 | 0.854466686 | 0.88871681 | 520 | 520 |
| SCO1      | 0.00805954  | 0.854526171 | 0.88872837 | 520 | 520 |
| PLEKHA6   | 0.008040296 | 0.854869662 | 0.88899391 | 520 | 520 |
| SAT2      | 0.008025679 | 0.855130603 | 0.8892194  | 520 | 520 |
| KRT77     | 0.008009775 | 0.855414515 | 0.8894229  | 520 | 440 |
| SNORA79   | 0.007996942 | 0.855643623 | 0.88961524 | 520 | 6   |
| LIPI      | 0.007971702 | 0.856094274 | 0.88997763 | 520 | 120 |
| CDC40     | 0.007970005 | 0.856124584 | 0.88997763 | 520 | 520 |
| ZNF397    | 0.007964795 | 0.856217615 | 0.89002846 | 520 | 520 |
| CA12      | 0.007948904 | 0.856501373 | 0.89027752 | 520 | 520 |
| OR2M4     | 0.007915546 | 0.857097099 | 0.89075899 | 520 | 19  |
| NLRP7     | 0.007872965 | 0.857857644 | 0.89141157 | 520 | 505 |
| OR8I2     | 0.007858604 | 0.858114188 | 0.8916322  | 520 | 5   |
| GFI1B     | 0.007829505 | 0.858634027 | 0.89201382 | 520 | 344 |
| PELI1     | 0.007822435 | 0.858760342 | 0.89201382 | 520 | 520 |
| CLIC2     | 0.007822047 | 0.858767273 | 0.89201382 | 520 | 520 |
| WASF1     | 0.007820927 | 0.858787295 | 0.89201382 | 520 | 520 |
| ATF6B     | 0.007820712 | 0.85879113  | 0.89201382 | 520 | 520 |
| ADIG      | 0.007803071 | 0.859106324 | 0.89224929 | 520 | 58  |
| BET1      | 0.007797469 | 0.859206427 | 0.89230729 | 520 | 520 |
| ACCN4     | 0.007780676 | 0.859506497 | 0.89252699 | 520 | 423 |
| CYP11A1   | 0.007754464 | 0.859974911 | 0.89292143 | 520 | 475 |
| C20orf196 | 0.007722488 | 0.860546407 | 0.89337681 | 520 | 520 |
| GOLGA8C   | 0.007695456 | 0.861029588 | 0.89378639 | 520 | 379 |
| TRIM62    | 0.00768665  | 0.861187006 | 0.89385776 | 520 | 520 |
| SP140     | 0.00765603  | 0.861734408 | 0.89432431 | 520 | 520 |



|           |             |             |            |     |     |
|-----------|-------------|-------------|------------|-----|-----|
| OR4A16    | 0.007604908 | 0.862648478 | 0.89509823 | 520 | 11  |
| MUM1      | 0.007599328 | 0.862748266 | 0.89515571 | 520 | 520 |
| C3orf50   | 0.007589165 | 0.862930008 | 0.89529821 | 520 | 135 |
| BCAR4     | 0.007554058 | 0.863557863 | 0.89581134 | 520 | 145 |
| CBLN2     | 0.007539124 | 0.86382498  | 0.89604233 | 520 | 439 |
| C18orf2   | 0.007409594 | 0.866142398 | 0.89790101 | 520 | 261 |
| DYNLRB2   | 0.007409103 | 0.866151187 | 0.89790101 | 520 | 435 |
| KIAA1009  | 0.007404096 | 0.866240794 | 0.89790158 | 520 | 520 |
| IL21      | 0.007330518 | 0.867557719 | 0.89908176 | 520 | 164 |
| UBA2      | 0.007315725 | 0.86782254  | 0.89921756 | 520 | 520 |
| UBTFL1    | 0.007283459 | 0.868400183 | 0.8996774  | 520 | 37  |
| RSAD1     | 0.007251063 | 0.868980237 | 0.90023209 | 520 | 520 |
| ZNF684    | 0.007246365 | 0.869064368 | 0.900273   | 520 | 520 |
| PLXNB3    | 0.007226338 | 0.869422988 | 0.90050571 | 520 | 520 |
| MRPL49    | 0.007220214 | 0.869532656 | 0.90057304 | 520 | 520 |
| GANC      | 0.007201215 | 0.869872915 | 0.9008329  | 520 | 520 |
| LOC646627 | 0.007185882 | 0.870147523 | 0.90107101 | 520 | 142 |
| CDCA7L    | 0.007137152 | 0.871020393 | 0.90192858 | 520 | 520 |
| PPP3R1    | 0.007059258 | 0.872415965 | 0.90304905 | 520 | 520 |
| PAGE4     | 0.007046182 | 0.872650283 | 0.90324523 | 520 | 53  |
| TLE4      | 0.006995932 | 0.873550832 | 0.90389896 | 520 | 520 |
| C2orf69   | 0.006986587 | 0.873718332 | 0.90402588 | 520 | 520 |
| INPP5F    | 0.006981337 | 0.873812424 | 0.90407685 | 520 | 520 |
| LOC643719 | 0.006968434 | 0.874043708 | 0.90422335 | 520 | 501 |
| DMBT1     | 0.006933457 | 0.87467069  | 0.90477914 | 520 | 495 |
| PLCD3     | 0.006922716 | 0.874863257 | 0.90493191 | 520 | 520 |
| SLC4A1    | 0.006905056 | 0.875179867 | 0.90512011 | 520 | 337 |
| POM121L12 | 0.006899403 | 0.875281227 | 0.90517851 | 520 | 10  |
| ADAD1     | 0.006825905 | 0.876599148 | 0.90614028 | 520 | 11  |
| TMEM217   | 0.006819187 | 0.876719646 | 0.9062013  | 520 | 520 |
| OR5B21    | 0.006802274 | 0.87702297  | 0.90646836 | 520 | 33  |
| ZIC4      | 0.006783733 | 0.877355519 | 0.90662618 | 520 | 329 |
| MSL1      | 0.006779237 | 0.877436172 | 0.90666306 | 520 | 520 |
| CDX4      | 0.00677666  | 0.877482387 | 0.90666435 | 520 | 25  |
| SULT6B1   | 0.006741616 | 0.878111009 | 0.9072209  | 520 | 18  |
| OTOP1     | 0.006681032 | 0.879197957 | 0.90820428 | 520 | 216 |
| NLRP8     | 0.006648145 | 0.879788067 | 0.90876731 | 520 | 50  |
| TNFRSF10B | 0.006632834 | 0.880062834 | 0.90900456 | 520 | 520 |
| PRAMEF9   | 0.006627977 | 0.880150008 | 0.90904803 | 520 | 45  |
| FGA       | 0.006593205 | 0.880774059 | 0.90959939 | 520 | 298 |
| IL3       | 0.006535662 | 0.881806964 | 0.91061946 | 520 | 45  |
| C6orf1    | 0.00652474  | 0.882003041 | 0.91074335 | 520 | 520 |
| REG3G     | 0.006496278 | 0.88251403  | 0.91106968 | 520 | 14  |
| PDC       | 0.006472166 | 0.882946955 | 0.91146994 | 520 | 195 |
| HYALP1    | 0.006465713 | 0.883062821 | 0.91149622 | 520 | 10  |
| PLXNA2    | 0.006432276 | 0.883663265 | 0.91202263 | 520 | 520 |

|              |             |             |            |     |     |
|--------------|-------------|-------------|------------|-----|-----|
| PCID2        | 0.006425793 | 0.883779689 | 0.91204942 | 520 | 520 |
| C8orf71      | 0.006397778 | 0.884282819 | 0.91238186 | 520 | 19  |
| SYAP1        | 0.006370627 | 0.884770463 | 0.91279159 | 520 | 520 |
| ADIPOR2      | 0.006326021 | 0.885571728 | 0.91352475 | 520 | 520 |
| IFT122       | 0.006279883 | 0.886400636 | 0.91405249 | 520 | 520 |
| AMBN         | 0.006238737 | 0.887139953 | 0.91472131 | 520 | 91  |
| INSM1        | 0.006168972 | 0.888393733 | 0.91577993 | 520 | 438 |
| C2orf77      | 0.006165396 | 0.888458004 | 0.91579937 | 520 | 520 |
| LOC100133985 | 0.006093203 | 0.889755724 | 0.91676211 | 520 | 517 |
| CDYL         | 0.006071166 | 0.890151913 | 0.9170766  | 520 | 520 |
| ABHD1        | 0.006048218 | 0.890564498 | 0.91745479 | 520 | 467 |
| PPP1R2P9     | 0.005970162 | 0.891968136 | 0.91868265 | 520 | 46  |
| NICN1        | 0.005969271 | 0.891984176 | 0.91868265 | 520 | 520 |
| LOC220429    | 0.005961155 | 0.892130142 | 0.91878606 | 520 | 513 |
| LYZL1        | 0.005957521 | 0.892195492 | 0.91880643 | 520 | 10  |
| MPG          | 0.005931778 | 0.8926585   | 0.91918936 | 520 | 520 |
| SUGT1L1      | 0.005928968 | 0.892709048 | 0.91919447 | 520 | 519 |
| TAS2R50      | 0.005921014 | 0.892852112 | 0.91929483 | 520 | 136 |
| HLA-F        | 0.005913321 | 0.892990502 | 0.91937174 | 520 | 520 |
| SAMD9        | 0.005894575 | 0.893327705 | 0.91956455 | 520 | 520 |
| KRTAP13-4    | 0.005894168 | 0.893335031 | 0.91956455 | 520 | 5   |
| POTEA        | 0.005883812 | 0.893521325 | 0.91962776 | 520 | 13  |
| TMEM63A      | 0.005882756 | 0.893540321 | 0.91962776 | 520 | 520 |
| SERPINB6     | 0.005865464 | 0.893851403 | 0.91990097 | 520 | 520 |
| PCDH8        | 0.005859211 | 0.893963901 | 0.91996979 | 520 | 280 |
| POMC         | 0.005757538 | 0.895793353 | 0.92157026 | 520 | 516 |
| SUPT16H      | 0.005732585 | 0.896242418 | 0.92193818 | 520 | 520 |
| TM4SF4       | 0.005718584 | 0.896494417 | 0.92215036 | 520 | 195 |
| NANOS1       | 0.005711538 | 0.896621237 | 0.92223376 | 520 | 520 |
| KRT7         | 0.005699287 | 0.896841731 | 0.92236645 | 520 | 520 |
| SERTAD3      | 0.005674552 | 0.897286965 | 0.92273023 | 520 | 520 |
| NLK          | 0.005652963 | 0.897675591 | 0.92303573 | 520 | 520 |
| CEP192       | 0.005531593 | 0.899860855 | 0.92510782 | 520 | 520 |
| PCCA         | 0.005522376 | 0.900026837 | 0.92517033 | 520 | 520 |
| EIF4E3       | 0.005454677 | 0.901246096 | 0.9263292  | 520 | 520 |
| SLC25A45     | 0.005436232 | 0.901578351 | 0.92662347 | 520 | 520 |
| LOC348021    | 0.005429929 | 0.901691883 | 0.92669292 | 520 | 40  |
| PRPF40A      | 0.005426852 | 0.9017473   | 0.92670264 | 520 | 520 |
| DVL2         | 0.00541119  | 0.902029445 | 0.92694535 | 520 | 520 |
| OC90         | 0.005391827 | 0.902378263 | 0.9272093  | 520 | 33  |
| PIRT         | 0.005303815 | 0.903964005 | 0.9286794  | 520 | 210 |
| FAM123A      | 0.005302194 | 0.903993216 | 0.9286794  | 520 | 162 |
| CCDC55       | 0.005296631 | 0.90409346  | 0.92873506 | 520 | 520 |
| FLJ45079     | 0.005290406 | 0.904205625 | 0.9287929  | 520 | 186 |
| PCM1         | 0.005281227 | 0.904371046 | 0.92885347 | 520 | 520 |
| MAT1A        | 0.005279618 | 0.904400032 | 0.92885347 | 520 | 500 |

|           |             |             |            |     |     |
|-----------|-------------|-------------|------------|-----|-----|
| AP2M1     | 0.005258635 | 0.904778172 | 0.92915442 | 520 | 520 |
| SRXN1     | 0.005240502 | 0.905104971 | 0.92935093 | 520 | 520 |
| CCR10     | 0.005240345 | 0.90510779  | 0.92935093 | 520 | 517 |
| POTED     | 0.005173242 | 0.906317274 | 0.93040329 | 520 | 12  |
| TKTL2     | 0.005166991 | 0.906429969 | 0.93043189 | 520 | 178 |
| RHEBL1    | 0.005129127 | 0.907112537 | 0.9309827  | 520 | 520 |
| PRKCD     | 0.005117819 | 0.907316398 | 0.93114454 | 520 | 520 |
| SPINK4    | 0.00511108  | 0.907437897 | 0.93121959 | 520 | 148 |
| CTDSP1    | 0.005106146 | 0.907526862 | 0.93121959 | 520 | 520 |
| RRP1B     | 0.005092384 | 0.907774973 | 0.93133075 | 520 | 520 |
| HOXA10    | 0.005083365 | 0.907937591 | 0.93145019 | 520 | 519 |
| C5orf20   | 0.005073509 | 0.908115301 | 0.93158511 | 520 | 512 |
| ZNF766    | 0.005062885 | 0.908306851 | 0.93168681 | 520 | 520 |
| MFSD10    | 0.005027182 | 0.908950646 | 0.93223747 | 520 | 520 |
| SNORA51   | 0.005023569 | 0.909015798 | 0.93223747 | 520 | 7   |
| LRP11     | 0.004961379 | 0.910137369 | 0.93313723 | 520 | 520 |
| FSHB      | 0.004942133 | 0.910484496 | 0.93344567 | 520 | 11  |
| CPNE5     | 0.004930251 | 0.910698799 | 0.93361791 | 520 | 520 |
| DPPA3     | 0.004897498 | 0.911289615 | 0.9341761  | 520 | 39  |
| PPT2      | 0.004872205 | 0.91174588  | 0.93459631 | 520 | 520 |
| TMEM229A  | 0.004851951 | 0.912111264 | 0.93492332 | 520 | 94  |
| DNAL4     | 0.004825798 | 0.912583106 | 0.93535941 | 520 | 520 |
| RNASE9    | 0.004778726 | 0.913432433 | 0.93608719 | 520 | 17  |
| MOCS3     | 0.004767125 | 0.913641774 | 0.93625414 | 520 | 520 |
| SCTR      | 0.004708398 | 0.914701543 | 0.9372925  | 520 | 267 |
| C20orf186 | 0.004698377 | 0.914882412 | 0.93738257 | 520 | 262 |
| DGAT2L6   | 0.004683141 | 0.915157383 | 0.93761666 | 520 | 87  |
| IFNGR2    | 0.004673375 | 0.915333649 | 0.9377496  | 520 | 520 |
| KRTAP15-1 | 0.004666799 | 0.915452346 | 0.93782356 | 520 | 4   |
| OR1S1     | 0.004656167 | 0.915644231 | 0.93792483 | 520 | 7   |
| OR8A1     | 0.004612324 | 0.916435624 | 0.93854294 | 520 | 31  |
| C11orf54  | 0.004610028 | 0.916477074 | 0.93854294 | 520 | 520 |
| OR6C75    | 0.00460893  | 0.916496885 | 0.93854294 | 520 | 18  |
| STK31     | 0.004604687 | 0.916573481 | 0.93854294 | 520 | 497 |
| PRH1      | 0.004568651 | 0.917224033 | 0.93906603 | 520 | 520 |
| C4orf32   | 0.004565086 | 0.917288387 | 0.93908423 | 520 | 520 |
| HTR5A     | 0.004549106 | 0.917576879 | 0.93933189 | 520 | 34  |
| CELF4     | 0.004503289 | 0.918404121 | 0.94003557 | 520 | 464 |
| MAP3K1    | 0.004473161 | 0.918948124 | 0.94044917 | 520 | 520 |
| VAMP2     | 0.004400327 | 0.92026343  | 0.94146077 | 520 | 520 |
| MAGEA12   | 0.004397698 | 0.920310897 | 0.94146157 | 520 | 359 |
| PAPL      | 0.004373533 | 0.920747347 | 0.94176471 | 520 | 512 |
| NIPSNAP1  | 0.004367872 | 0.920849594 | 0.9418038  | 520 | 520 |
| FUNDC2    | 0.00435773  | 0.921032783 | 0.94185177 | 520 | 520 |
| AASS      | 0.004332718 | 0.92148456  | 0.94208866 | 520 | 520 |
| UTS2      | 0.00430837  | 0.921924363 | 0.94249051 | 520 | 435 |

|              |             |             |            |     |     |
|--------------|-------------|-------------|------------|-----|-----|
| HSPC157      | 0.004290946 | 0.922239121 | 0.9427235  | 520 | 520 |
| LOH12CR1     | 0.004289509 | 0.922265076 | 0.9427235  | 520 | 520 |
| RPUSD4       | 0.00428799  | 0.922292521 | 0.9427235  | 520 | 520 |
| LOC100132354 | 0.004254132 | 0.922904186 | 0.94330089 | 520 | 279 |
| C19orf29     | 0.004230078 | 0.923338765 | 0.94360158 | 520 | 520 |
| C9orf27      | 0.004198772 | 0.923904399 | 0.94408394 | 520 | 9   |
| DUSP2        | 0.004167885 | 0.924462485 | 0.94455848 | 520 | 520 |
| C17orf44     | 0.004145191 | 0.924872579 | 0.9449296  | 520 | 520 |
| PCMT1        | 0.004104892 | 0.925600826 | 0.94551199 | 520 | 520 |
| PYCR1        | 0.004101625 | 0.925659862 | 0.94551199 | 520 | 520 |
| MAPK1IP1L    | 0.004100674 | 0.925677054 | 0.94551199 | 520 | 520 |
| GCK          | 0.004073692 | 0.926164695 | 0.94591424 | 520 | 496 |
| RPL23AP64    | 0.004043406 | 0.926712073 | 0.94642536 | 520 | 477 |
| PTPN6        | 0.003971251 | 0.92801634  | 0.94751742 | 520 | 520 |
| SNIP1        | 0.003953478 | 0.928337627 | 0.94770149 | 520 | 520 |
| NLRP4        | 0.003948248 | 0.928432167 | 0.94775002 | 520 | 273 |
| CEP110       | 0.003940815 | 0.92856655  | 0.94779124 | 520 | 520 |
| TMEM14E      | 0.003923287 | 0.928883428 | 0.94805577 | 520 | 279 |
| SNORA2B      | 0.003921278 | 0.928919747 | 0.94805577 | 520 | 12  |
| ATR          | 0.003874955 | 0.929757259 | 0.94871845 | 520 | 520 |
| PTCD2        | 0.003826603 | 0.930631523 | 0.94946641 | 520 | 520 |
| LPCAT3       | 0.003809289 | 0.930944618 | 0.94973778 | 520 | 520 |
| 9-Sep        | 0.003795079 | 0.931201572 | 0.94992351 | 520 | 520 |
| GAS2L1       | 0.003794011 | 0.93122089  | 0.94992351 | 520 | 520 |
| WFDC10B      | 0.003782202 | 0.931434434 | 0.95009328 | 520 | 226 |
| DYNLL2       | 0.003760332 | 0.931829941 | 0.95028883 | 520 | 520 |
| PDSS2        | 0.003758571 | 0.931861785 | 0.95028883 | 520 | 520 |
| HOXA2        | 0.003746015 | 0.932088858 | 0.95047232 | 520 | 512 |
| YWHAQ        | 0.003725164 | 0.93246596  | 0.9507607  | 520 | 520 |
| OR5F1        | 0.003710784 | 0.932726051 | 0.9509183  | 520 | 8   |
| DARS2        | 0.003675203 | 0.933369597 | 0.95133002 | 520 | 520 |
| NAMPT        | 0.003673425 | 0.933401757 | 0.95133002 | 520 | 520 |
| ZNF561       | 0.003632745 | 0.934137594 | 0.95193564 | 520 | 520 |
| THNSL1       | 0.003599187 | 0.934744655 | 0.95236136 | 520 | 520 |
| DCK          | 0.003581253 | 0.935069089 | 0.95254034 | 520 | 520 |
| CMPK2        | 0.003578784 | 0.935113754 | 0.95254034 | 520 | 520 |
| EIF1AY       | 0.003570103 | 0.935270803 | 0.95256266 | 520 | 423 |
| CDC20B       | 0.003570006 | 0.935272547 | 0.95256266 | 520 | 324 |
| ABCG4        | 0.003559915 | 0.935455104 | 0.95270048 | 520 | 519 |
| CALHM3       | 0.003506582 | 0.936420042 | 0.95344242 | 520 | 357 |
| OR2T34       | 0.003459212 | 0.937277144 | 0.95417056 | 520 | 7   |
| PABPN1L      | 0.003405623 | 0.938246875 | 0.95498785 | 520 | 121 |
| NRM          | 0.003380641 | 0.938698982 | 0.95530477 | 520 | 520 |
| OR2M5        | 0.003379319 | 0.938722911 | 0.95530477 | 520 | 8   |
| GUCY2E       | 0.003338232 | 0.939466501 | 0.95591676 | 520 | 68  |
| CXCL10       | 0.003331067 | 0.939596173 | 0.95595223 | 520 | 520 |

|          |             |             |            |     |     |
|----------|-------------|-------------|------------|-----|-----|
| AMIGO1   | 0.003296529 | 0.940221294 | 0.95644346 | 520 | 519 |
| CLCN3    | 0.003268304 | 0.940732169 | 0.95681833 | 520 | 520 |
| ENOX2    | 0.003254919 | 0.940974451 | 0.95701648 | 520 | 520 |
| TTR      | 0.003250339 | 0.941057358 | 0.95705066 | 520 | 100 |
| PRKCI    | 0.003247819 | 0.941102983 | 0.95705066 | 520 | 520 |
| TMEM194A | 0.003217796 | 0.941646446 | 0.95745847 | 520 | 520 |
| DMTF1    | 0.003184763 | 0.942244438 | 0.9580182  | 520 | 520 |
| FBXO47   | 0.003162501 | 0.942647463 | 0.95833132 | 520 | 112 |
| ATP6V1E2 | 0.00311029  | 0.943592731 | 0.95921499 | 520 | 520 |
| POLDIP3  | 0.003108686 | 0.943621777 | 0.95921499 | 520 | 520 |
| CCDC47   | 0.003106609 | 0.943659383 | 0.95921499 | 520 | 520 |
| MAP3K11  | 0.003082001 | 0.944104944 | 0.95957245 | 520 | 520 |
| HELT     | 0.00308193  | 0.944106223 | 0.95957245 | 520 | 67  |
| MASP2    | 0.003075392 | 0.944224602 | 0.95959603 | 520 | 509 |
| OR5H2    | 0.003070982 | 0.94430446  | 0.95962882 | 520 | 9   |
| CHRAC1   | 0.003054505 | 0.94460279  | 0.95973852 | 520 | 520 |
| MESTIT1  | 0.003048892 | 0.944704432 | 0.95979343 | 520 | 197 |
| ZNF764   | 0.00295081  | 0.94648057  | 0.96123351 | 520 | 520 |
| ZNF323   | 0.002949558 | 0.946503244 | 0.96123351 | 520 | 520 |
| COLEC11  | 0.002919656 | 0.947044783 | 0.96168661 | 520 | 513 |
| CNTROB   | 0.002902685 | 0.94735215  | 0.96195028 | 520 | 520 |
| MKRN2    | 0.002897543 | 0.94744528  | 0.96195984 | 520 | 520 |
| ALS2CR4  | 0.002866784 | 0.948002377 | 0.96237217 | 520 | 520 |
| PUF60    | 0.002852244 | 0.948265739 | 0.96256544 | 520 | 520 |
| UPP2     | 0.002843336 | 0.948427082 | 0.96256544 | 520 | 143 |
| RBMV3AP  | 0.002828566 | 0.948694623 | 0.96273678 | 520 | 5   |
| TMEM9    | 0.002817102 | 0.948902265 | 0.96289393 | 520 | 520 |
| CABP1    | 0.002781628 | 0.949544861 | 0.96325515 | 520 | 502 |
| TAF4     | 0.002774396 | 0.949675863 | 0.96333958 | 520 | 520 |
| TIGD7    | 0.002771418 | 0.9497298   | 0.96334583 | 520 | 520 |
| VSX1     | 0.002740492 | 0.950290042 | 0.96381713 | 520 | 144 |
| TBPL2    | 0.002724834 | 0.950573687 | 0.96397143 | 520 | 54  |
| BLOC1S3  | 0.002724177 | 0.95058559  | 0.96397143 | 520 | 520 |
| ISYNA1   | 0.002717718 | 0.950702609 | 0.96404161 | 520 | 520 |
| MAPK7    | 0.002669089 | 0.951583604 | 0.96478941 | 520 | 520 |
| C16orf68 | 0.002655914 | 0.951822316 | 0.96493782 | 520 | 520 |
| C1orf92  | 0.002649787 | 0.951933325 | 0.96495579 | 520 | 317 |
| ZSWIM5   | 0.002649466 | 0.951939133 | 0.96495579 | 520 | 519 |
| CACNG2   | 0.002638807 | 0.952132261 | 0.96503491 | 520 | 115 |
| COLEC10  | 0.002625955 | 0.952365112 | 0.96516586 | 520 | 382 |
| OR9K2    | 0.002615929 | 0.95254678  | 0.96528059 | 520 | 29  |
| ZBTB3    | 0.00258703  | 0.953070401 | 0.96566562 | 520 | 520 |
| SIT1     | 0.002524669 | 0.954200388 | 0.96661626 | 520 | 519 |
| CYB5D1   | 0.002512639 | 0.954418382 | 0.96678852 | 520 | 520 |
| OR6C2    | 0.002498557 | 0.954673575 | 0.96688105 | 520 | 162 |
| FAM64A   | 0.002498243 | 0.954679271 | 0.96688105 | 520 | 520 |

|               |             |             |            |     |     |
|---------------|-------------|-------------|------------|-----|-----|
| NHLH1         | 0.002475912 | 0.95508394  | 0.9670915  | 520 | 504 |
| NCR2          | 0.002474961 | 0.955101181 | 0.9670915  | 520 | 275 |
| LARP4         | 0.002459877 | 0.95537453  | 0.96731971 | 520 | 520 |
| UROD          | 0.00245628  | 0.955439725 | 0.96733715 | 520 | 520 |
| CPA1          | 0.002430656 | 0.955904093 | 0.96774424 | 520 | 232 |
| PRSS55        | 0.002402383 | 0.956416504 | 0.96808305 | 520 | 104 |
| DYRK1A        | 0.002367824 | 0.957042856 | 0.96861979 | 520 | 520 |
| TBC1D28       | 0.00230735  | 0.958138958 | 0.9695345  | 520 | 39  |
| CXADRP3       | 0.002298878 | 0.958292529 | 0.96964124 | 520 | 484 |
| LOC441454     | 0.002289176 | 0.958468382 | 0.96977051 | 520 | 472 |
| MIR155HG      | 0.002211336 | 0.959879391 | 0.97080593 | 520 | 518 |
| PKD2L1        | 0.002208818 | 0.959925049 | 0.97080593 | 520 | 464 |
| DGKK          | 0.002188727 | 0.960289261 | 0.97112557 | 520 | 52  |
| DNAJC25-GNG10 | 0.002171695 | 0.960598028 | 0.97134039 | 520 | 142 |
| TGDS          | 0.00213914  | 0.961188204 | 0.97179218 | 520 | 520 |
| CCM2          | 0.002139074 | 0.961189409 | 0.97179218 | 520 | 520 |
| CUL1          | 0.002076023 | 0.962332517 | 0.97273185 | 520 | 520 |
| ASCL1         | 0.002074967 | 0.962351668 | 0.97273185 | 520 | 351 |
| SLC7A11       | 0.002064707 | 0.962537689 | 0.97286266 | 520 | 520 |
| C9orf79       | 0.00204482  | 0.96289826  | 0.97312954 | 520 | 80  |
| FMO4          | 0.002020441 | 0.963340289 | 0.97344125 | 520 | 520 |
| MOXD1         | 0.001996738 | 0.963770062 | 0.97381537 | 520 | 520 |
| KCNH8         | 0.001987977 | 0.963928925 | 0.97386921 | 520 | 411 |
| PEX13         | 0.001987537 | 0.963936909 | 0.97386921 | 520 | 520 |
| KIAA0174      | 0.001985809 | 0.963968242 | 0.97386921 | 520 | 520 |
| C20orf46      | 0.001951143 | 0.964596825 | 0.97440661 | 520 | 520 |
| DEFB106A      | 0.001922555 | 0.965115209 | 0.97487677 | 520 | 3   |
| KPNA4         | 0.001898972 | 0.965542856 | 0.9752157  | 520 | 520 |
| TGFBR3        | 0.001889513 | 0.965714383 | 0.97527039 | 520 | 520 |
| MMP27         | 0.001887984 | 0.965742113 | 0.97527039 | 520 | 407 |
| PRKRA         | 0.001852047 | 0.966393805 | 0.97578191 | 520 | 520 |
| FTHL17        | 0.001823039 | 0.966919874 | 0.97616644 | 520 | 91  |
| CDKN2B        | 0.001794838 | 0.967431304 | 0.97658497 | 520 | 520 |
| ONECUT3       | 0.001781801 | 0.96766775  | 0.97677476 | 520 | 125 |
| PRCD          | 0.001773873 | 0.967811531 | 0.97682209 | 520 | 511 |
| RCE1          | 0.001768117 | 0.967915921 | 0.9768488  | 520 | 520 |
| LOC168474     | 0.001767072 | 0.967934881 | 0.9768488  | 520 | 512 |
| CLUL1         | 0.001735507 | 0.968507343 | 0.97734753 | 520 | 395 |
| TBX21         | 0.001734478 | 0.968526006 | 0.97734753 | 520 | 517 |
| CTXN2         | 0.001726188 | 0.968676369 | 0.97735253 | 520 | 55  |
| CNIH          | 0.001675511 | 0.969595499 | 0.97813306 | 520 | 520 |
| SLITRK5       | 0.001592564 | 0.971100023 | 0.97935685 | 520 | 418 |
| PRR18         | 0.001581372 | 0.971303028 | 0.97951259 | 520 | 304 |
| PRB4          | 0.001572791 | 0.971458687 | 0.97962057 | 520 | 107 |
| GLRA3         | 0.001559472 | 0.971700279 | 0.97981519 | 520 | 306 |
| MAP2K4        | 0.001524886 | 0.972327665 | 0.98030075 | 520 | 520 |

|           |             |             |            |     |     |
|-----------|-------------|-------------|------------|-----|-----|
| RBMY2EP   | 0.001516472 | 0.972480291 | 0.98035659 | 520 | 11  |
| OR8D1     | 0.001455782 | 0.973581231 | 0.98107104 | 520 | 28  |
| LOC285194 | 0.00144716  | 0.97373764  | 0.98108458 | 520 | 41  |
| SPANXN1   | 0.001413125 | 0.974355075 | 0.98155954 | 520 | 31  |
| KRT35     | 0.001402803 | 0.974542331 | 0.98169913 | 520 | 58  |
| TMEM151A  | 0.001388589 | 0.974800195 | 0.98190984 | 520 | 479 |
| OR6K6     | 0.001351563 | 0.97547192  | 0.98253738 | 520 | 6   |
| SLC25A15  | 0.001332089 | 0.975825226 | 0.98284415 | 520 | 520 |
| OR51F2    | 0.001295415 | 0.976490601 | 0.98346519 | 520 | 23  |
| MC5R      | 0.001247262 | 0.977364248 | 0.9841976  | 520 | 160 |
| DLX4      | 0.001238581 | 0.977521745 | 0.98428201 | 520 | 520 |
| OPTN      | 0.001237261 | 0.977545698 | 0.98428201 | 520 | 520 |
| KIAA0467  | 0.001218846 | 0.977879827 | 0.98452011 | 520 | 520 |
| SKAP1     | 0.001172891 | 0.97871363  | 0.98509636 | 520 | 520 |
| SAA3P     | 0.00116206  | 0.978910143 | 0.98521308 | 520 | 12  |
| AGXT2     | 0.001157103 | 0.979000102 | 0.98524078 | 520 | 45  |
| OR5M11    | 0.001148336 | 0.979159161 | 0.98524078 | 520 | 185 |
| OR1F1     | 0.00114168  | 0.97927994  | 0.98524078 | 520 | 298 |
| ACVR1B    | 0.001135202 | 0.979397483 | 0.98524078 | 520 | 520 |
| SERPINA12 | 0.001133615 | 0.979426277 | 0.98524078 | 520 | 303 |
| DCAF8     | 0.001120401 | 0.979666033 | 0.9854328  | 520 | 520 |
| PGRMC2    | 0.001097503 | 0.98008153  | 0.98580156 | 520 | 520 |
| GBP4      | 0.001091254 | 0.980194909 | 0.98584942 | 520 | 520 |
| TAF9B     | 0.001084916 | 0.980309926 | 0.98588376 | 520 | 520 |
| SERHL2    | 0.001069687 | 0.980586257 | 0.98605018 | 520 | 519 |
| C1orf130  | 0.001031532 | 0.981278596 | 0.9866119  | 520 | 493 |
| PPM1B     | 0.001018972 | 0.981506505 | 0.98679184 | 520 | 520 |
| PSMD11    | 0.000977163 | 0.982265192 | 0.98740692 | 520 | 520 |
| PML       | 0.000947547 | 0.982802603 | 0.98787634 | 520 | 520 |
| LDHAL6A   | 0.000946029 | 0.982830157 | 0.98787634 | 520 | 305 |
| WDR67     | 0.000930843 | 0.983105735 | 0.98805483 | 520 | 520 |
| CCT2      | 0.000920795 | 0.983288068 | 0.98812865 | 520 | 520 |
| YES1      | 0.000918694 | 0.983326196 | 0.98812865 | 520 | 520 |
| PON1      | 0.000909831 | 0.983487039 | 0.98824103 | 520 | 189 |
| C9orf11   | 0.000882396 | 0.983984898 | 0.9885935  | 520 | 316 |
| MTMR12    | 0.000840317 | 0.984748508 | 0.9892621  | 520 | 520 |
| CDKL2     | 0.000832343 | 0.984893229 | 0.9893582  | 520 | 490 |
| FAM54B    | 0.000807234 | 0.985348894 | 0.98966802 | 520 | 520 |
| DCAF12L1  | 0.000788755 | 0.985684246 | 0.98995553 | 520 | 66  |
| GSC2      | 0.000775508 | 0.985924657 | 0.99013527 | 520 | 42  |
| C19orf21  | 0.000773482 | 0.985961422 | 0.99013527 | 520 | 520 |
| RIT2      | 0.000731141 | 0.986729831 | 0.99070957 | 520 | 31  |
| FAM119A   | 0.000700237 | 0.987290682 | 0.9910376  | 520 | 520 |
| UGT1A5    | 0.000699598 | 0.987302282 | 0.9910376  | 520 | 111 |
| MORC3     | 0.000691691 | 0.987445776 | 0.99113229 | 520 | 520 |
| GNGT1     | 0.000673423 | 0.987777321 | 0.99125053 | 520 | 462 |

|              |              |             |            |     |     |
|--------------|--------------|-------------|------------|-----|-----|
| C19orf75     | 0.000672755  | 0.98778944  | 0.99125053 | 520 | 61  |
| ASFMR1       | 0.000666239  | 0.987907694 | 0.99125053 | 520 | 297 |
| CCT5         | 0.000649983  | 0.98820273  | 0.99139857 | 520 | 520 |
| PADI3        | 0.000646836  | 0.988259839 | 0.99140654 | 520 | 518 |
| TMEM189      | 0.000622591  | 0.988699862 | 0.99179862 | 520 | 520 |
| HOXD13       | 0.000619243  | 0.988760623 | 0.99181023 | 520 | 481 |
| SLC25A38     | 0.000616513  | 0.988810181 | 0.9918106  | 520 | 520 |
| ZNF530       | 0.000589972  | 0.989291859 | 0.99224438 | 520 | 520 |
| DKKL1        | 0.000542253  | 0.990157935 | 0.99291549 | 520 | 434 |
| LOC100128292 | 0.000517711  | 0.990603363 | 0.99331276 | 520 | 520 |
| TXNDC16      | 0.000514716  | 0.990657706 | 0.99331785 | 520 | 520 |
| XAF1         | 0.000450625  | 0.991820955 | 0.99394807 | 520 | 520 |
| IFNB1        | 0.000449988  | 0.99183251  | 0.99394807 | 520 | 222 |
| RBM28        | 0.00044985   | 0.991835021 | 0.99394807 | 520 | 520 |
| TBX19        | 0.00041375   | 0.992490218 | 0.99446297 | 520 | 520 |
| LRRIQ4       | 0.000395913  | 0.992813968 | 0.99458967 | 520 | 323 |
| PRPH         | 0.000378182  | 0.993135781 | 0.99486263 | 520 | 492 |
| LOC100188949 | 0.000360882  | 0.99344978  | 0.99512774 | 520 | 505 |
| LAMA5        | 0.000333449  | 0.993947706 | 0.99547815 | 520 | 520 |
| ZNF444       | 0.000321844  | 0.994158332 | 0.99563965 | 520 | 520 |
| RNF165       | 0.000299515  | 0.994563611 | 0.99599606 | 520 | 517 |
| CSNK1A1L     | 0.000294607  | 0.994652696 | 0.9960358  | 520 | 520 |
| MPZL3        | 0.000235844  | 0.995719269 | 0.99690583 | 520 | 520 |
| RHOG         | 0.000197926  | 0.996407506 | 0.99744631 | 520 | 520 |
| TMEM179      | 0.00014247   | 0.997414066 | 0.99810706 | 520 | 78  |
| CARS         | 0.000129928  | 0.997641707 | 0.998264   | 520 | 520 |
| CEACAM21     | 9.64E-05     | 0.99824954  | 0.99866308 | 520 | 516 |
| AIFM3        | 5.96E-05     | 0.998917718 | 0.99916548 | 520 | 519 |
| CT47A6       | 3.22E-05     | 0.999416425 | 0.99951556 | 520 | 6   |
| OR52N2       | 1.78E-05     | 0.999677183 | 0.99967718 | 520 | 115 |
| FAM18B       | -1.83E-05    | 0.99966829  | 0.99967718 | 520 | 520 |
| FLJ39582     | -4.82E-05    | 0.999125494 | 0.99927417 | 520 | 520 |
| LOC285375    | -5.51E-05    | 0.998999123 | 0.99919734 | 520 | 25  |
| RBM41        | -6.64E-05    | 0.998794667 | 0.99909196 | 520 | 520 |
| RHD          | -8.40E-05    | 0.99847515  | 0.99882189 | 520 | 470 |
| FOXA3        | -9.55E-05    | 0.998266865 | 0.99866308 | 520 | 475 |
| NHEJ1        | -0.000108249 | 0.998035197 | 0.9985304  | 520 | 520 |
| CENPF        | -0.000119413 | 0.997832572 | 0.99837721 | 520 | 520 |
| LOC440905    | -0.000128374 | 0.99766991  | 0.998264   | 520 | 426 |
| TCERG1L      | -0.00014363  | 0.997393006 | 0.99810706 | 520 | 428 |
| SNX2         | -0.000153477 | 0.997214282 | 0.99800619 | 520 | 520 |
| CXCR6        | -0.000155081 | 0.997185172 | 0.99800619 | 520 | 520 |
| PLAC1        | -0.000157406 | 0.997142956 | 0.99800619 | 520 | 515 |
| AKAP4        | -0.000167446 | 0.996960729 | 0.99790102 | 520 | 54  |
| MAST3        | -0.000188094 | 0.996585954 | 0.99757542 | 520 | 520 |
| KIAA2022     | -0.00020341  | 0.996307955 | 0.99739617 | 520 | 459 |



|              |              |             |            |     |     |
|--------------|--------------|-------------|------------|-----|-----|
| OR8H3        | -0.000226759 | 0.995884156 | 0.99702141 | 520 | 5   |
| DPH2         | -0.000262942 | 0.995227425 | 0.99646287 | 520 | 520 |
| VN1R1        | -0.000285693 | 0.994814477 | 0.99609887 | 520 | 501 |
| MSH6         | -0.000288081 | 0.994771142 | 0.99609887 | 520 | 520 |
| C1orf183     | -0.000343651 | 0.993762531 | 0.99534213 | 520 | 520 |
| PPP1R15B     | -0.000344169 | 0.993753133 | 0.99534213 | 520 | 520 |
| C6orf48      | -0.000396904 | 0.992795973 | 0.99458967 | 520 | 520 |
| WDR41        | -0.000407579 | 0.992602228 | 0.99447637 | 520 | 520 |
| RCOR3        | -0.00040899  | 0.992576616 | 0.99447637 | 520 | 520 |
| KRTAP8-1     | -0.000432521 | 0.992149528 | 0.994171   | 520 | 9   |
| LOC401397    | -0.000447495 | 0.991877753 | 0.99394807 | 520 | 520 |
| TRY6         | -0.000456976 | 0.991705673 | 0.99394807 | 520 | 74  |
| OR52B6       | -0.000459577 | 0.991658473 | 0.99394807 | 520 | 39  |
| POLR3C       | -0.000467274 | 0.991518769 | 0.99388469 | 520 | 520 |
| NINL         | -0.000468767 | 0.991491679 | 0.99388469 | 520 | 520 |
| PPY          | -0.000479053 | 0.991304976 | 0.99376919 | 520 | 205 |
| BTBD9        | -0.000484917 | 0.991198558 | 0.99371191 | 520 | 520 |
| SENP2        | -0.000487109 | 0.991158775 | 0.99371191 | 520 | 520 |
| GPR89A       | -0.00050699  | 0.990797931 | 0.99340905 | 520 | 520 |
| PHLDA3       | -0.000553773 | 0.989948855 | 0.9927552  | 520 | 520 |
| LOC100302650 | -0.000577226 | 0.9895232   | 0.99237769 | 520 | 520 |
| SERHL        | -0.000584909 | 0.989383754 | 0.99228719 | 520 | 520 |
| KCNJ10       | -0.000657177 | 0.98807216  | 0.9913169  | 520 | 490 |
| N6AMT1       | -0.000660047 | 0.988020083 | 0.99131397 | 520 | 520 |
| OR3A3        | -0.000667282 | 0.987888772 | 0.99125053 | 520 | 45  |
| SFTPA1       | -0.000670199 | 0.987835842 | 0.99125053 | 520 | 370 |
| KCNK4        | -0.000674669 | 0.987754711 | 0.99125053 | 520 | 401 |
| MACROD2      | -0.000674929 | 0.987749988 | 0.99125053 | 520 | 510 |
| CFHR2        | -0.000713525 | 0.987049532 | 0.99088254 | 520 | 30  |
| TRIM69       | -0.000723493 | 0.986868626 | 0.99075026 | 520 | 520 |
| EIF4EBP2     | -0.000726071 | 0.986821832 | 0.99075026 | 520 | 520 |
| KRTAP20-4    | -0.000741275 | 0.986545918 | 0.99057424 | 520 | 8   |
| ACOXL        | -0.000746216 | 0.986456237 | 0.99053352 | 520 | 457 |
| OR2A1        | -0.000746731 | 0.986446896 | 0.99053352 | 520 | 499 |
| HP           | -0.000815411 | 0.985200491 | 0.98956825 | 520 | 459 |
| TTY1B        | -0.000824892 | 0.985028433 | 0.98944472 | 520 | 7   |
| SRCRB4D      | -0.000864703 | 0.984305976 | 0.98886681 | 520 | 520 |
| LOC388588    | -0.00089566  | 0.983744186 | 0.98840091 | 520 | 515 |
| ZC3H15       | -0.000896832 | 0.983722926 | 0.98840091 | 520 | 520 |
| C4orf45      | -0.000924994 | 0.98321187  | 0.98811225 | 520 | 19  |
| C3orf67      | -0.000942924 | 0.982886505 | 0.98788373 | 520 | 520 |
| LRRC67       | -0.000995264 | 0.981936727 | 0.98712594 | 520 | 86  |
| CA1          | -0.001003692 | 0.981783785 | 0.9870214  | 520 | 124 |
| COX7B2       | -0.00105431  | 0.980865271 | 0.9862455  | 520 | 78  |
| ETNK1        | -0.001067711 | 0.980622109 | 0.98605018 | 520 | 520 |
| KHNYN        | -0.001070911 | 0.980564042 | 0.98605018 | 520 | 520 |

|           |              |             |            |     |     |
|-----------|--------------|-------------|------------|-----|-----|
| DACH2     | -0.001089492 | 0.980226895 | 0.98584942 | 520 | 224 |
| PPY2      | -0.001136083 | 0.979381495 | 0.98524078 | 520 | 71  |
| C5orf40   | -0.00113737  | 0.979358141 | 0.98524078 | 520 | 326 |
| ULBP2     | -0.00113891  | 0.979330197 | 0.98524078 | 520 | 520 |
| ZNF35     | -0.001142471 | 0.979265577 | 0.98524078 | 520 | 520 |
| ANGPTL3   | -0.001152008 | 0.979092542 | 0.98524078 | 520 | 202 |
| CEACAM18  | -0.001171145 | 0.978745312 | 0.98509636 | 520 | 36  |
| FLJ44082  | -0.001186797 | 0.978461321 | 0.98490885 | 520 | 14  |
| CELA1     | -0.001187325 | 0.978451731 | 0.98490885 | 520 | 153 |
| SPDYE2    | -0.001193238 | 0.97834445  | 0.98488954 | 520 | 267 |
| FCHO1     | -0.001208325 | 0.978070714 | 0.98466313 | 520 | 520 |
| XRRA1     | -0.001220666 | 0.977846803 | 0.98452011 | 520 | 520 |
| C9orf57   | -0.00125108  | 0.977294979 | 0.98417699 | 520 | 40  |
| C1orf186  | -0.001289559 | 0.976596847 | 0.98352307 | 520 | 517 |
| C17orf107 | -0.001413274 | 0.974352384 | 0.98155954 | 520 | 520 |
| MRPL33    | -0.001413294 | 0.974352008 | 0.98155954 | 520 | 520 |
| ZSCAN22   | -0.001449874 | 0.973688409 | 0.981084   | 520 | 520 |
| C6orf15   | -0.001453265 | 0.973626885 | 0.98107104 | 520 | 488 |
| SFTA3     | -0.001458956 | 0.97352366  | 0.98106507 | 520 | 113 |
| GPR101    | -0.001470403 | 0.973315998 | 0.98090483 | 520 | 40  |
| ARHGAP26  | -0.001487723 | 0.973001804 | 0.9806372  | 520 | 520 |
| ZNF584    | -0.001496474 | 0.972843061 | 0.98052622 | 520 | 520 |
| SVOP      | -0.001496585 | 0.972841049 | 0.98052622 | 520 | 306 |
| METT10D   | -0.001507281 | 0.972647016 | 0.98042664 | 520 | 520 |
| TRIB3     | -0.001513384 | 0.972536313 | 0.98036406 | 520 | 520 |
| CBX2      | -0.001517953 | 0.972453424 | 0.98035659 | 520 | 520 |
| DEFB129   | -0.001526644 | 0.972295763 | 0.98030075 | 520 | 3   |
| XKR7      | -0.00153398  | 0.972162703 | 0.98023246 | 520 | 119 |
| HIST1H2BN | -0.001595459 | 0.971047509 | 0.97935287 | 520 | 515 |
| DOLK      | -0.00160806  | 0.970818939 | 0.97917132 | 520 | 520 |
| TAS2R42   | -0.001631082 | 0.970401351 | 0.9787991  | 520 | 92  |
| BANF2     | -0.001646206 | 0.970127034 | 0.97857136 | 520 | 13  |
| DHX40P1   | -0.001654406 | 0.969978302 | 0.97847028 | 520 | 192 |
| SLC25A2   | -0.001689113 | 0.969348803 | 0.97793312 | 520 | 292 |
| C8orf30A  | -0.001723361 | 0.968727634 | 0.97735535 | 520 | 520 |
| BIRC3     | -0.001728546 | 0.968633595 | 0.97735253 | 520 | 520 |
| OR8B12    | -0.001730186 | 0.968603854 | 0.97735253 | 520 | 20  |
| OLFM4     | -0.001778196 | 0.967733131 | 0.97679185 | 520 | 460 |
| GABRA1    | -0.001802956 | 0.967284085 | 0.97648525 | 520 | 102 |
| KIAA0146  | -0.001839633 | 0.966618947 | 0.9759115  | 520 | 520 |
| TDGF3     | -0.001844606 | 0.966528761 | 0.97586931 | 520 | 160 |
| SLC12A1   | -0.001862667 | 0.966201228 | 0.97563631 | 520 | 225 |
| PTGS2     | -0.001869335 | 0.966080301 | 0.97556306 | 520 | 520 |
| PRAMEF11  | -0.001891546 | 0.965677519 | 0.97527039 | 520 | 104 |
| DARC      | -0.001920144 | 0.965158941 | 0.97487677 | 520 | 520 |
| TAPBP     | -0.00196042  | 0.96442861  | 0.9742855  | 520 | 520 |

|           |              |             |            |     |     |
|-----------|--------------|-------------|------------|-----|-----|
| PRY2      | -0.002019821 | 0.963351521 | 0.97344125 | 520 | 61  |
| PHKA1     | -0.002030669 | 0.963154828 | 0.97334005 | 520 | 520 |
| SNORA72   | -0.002054825 | 0.962716861 | 0.97299498 | 520 | 127 |
| LOC441046 | -0.002074506 | 0.962360033 | 0.97273185 | 520 | 497 |
| ITIH1     | -0.002077093 | 0.962313127 | 0.97273185 | 520 | 351 |
| GPR61     | -0.002100058 | 0.961896757 | 0.97245857 | 520 | 315 |
| MRGPRD    | -0.002148454 | 0.961019361 | 0.9717177  | 520 | 104 |
| KANK1     | -0.002185769 | 0.960342869 | 0.97113107 | 520 | 520 |
| WNT10B    | -0.002214806 | 0.959816494 | 0.97079353 | 520 | 520 |
| FAM160A2  | -0.002218649 | 0.959746828 | 0.97077176 | 520 | 520 |
| TRIM48    | -0.002226106 | 0.959611654 | 0.97068373 | 520 | 56  |
| ANGPTL4   | -0.002231593 | 0.959512179 | 0.9706318  | 520 | 520 |
| ZIC3      | -0.002243111 | 0.959303396 | 0.97046928 | 520 | 83  |
| PAPD4     | -0.002244077 | 0.959285876 | 0.97046928 | 520 | 520 |
| LOC387646 | -0.002254373 | 0.959099248 | 0.97036012 | 520 | 512 |
| UBASH3A   | -0.002324664 | 0.957825136 | 0.96926559 | 520 | 517 |
| API5      | -0.002343415 | 0.957485271 | 0.96897029 | 520 | 520 |
| TMTC2     | -0.002362024 | 0.957147977 | 0.96867757 | 520 | 520 |
| NAT6      | -0.00237478  | 0.956916782 | 0.96854081 | 520 | 520 |
| CA13      | -0.0024235   | 0.956033785 | 0.96774424 | 520 | 520 |
| ECHDC3    | -0.002423976 | 0.956025163 | 0.96774424 | 520 | 520 |
| DIRC2     | -0.002425791 | 0.955992271 | 0.96774424 | 520 | 520 |
| STX16     | -0.002476807 | 0.955067722 | 0.9670915  | 520 | 520 |
| PRM3      | -0.002489236 | 0.954842493 | 0.96697524 | 520 | 20  |
| OR6B1     | -0.002497014 | 0.954701534 | 0.96688105 | 520 | 5   |
| BPY2      | -0.002506599 | 0.954527837 | 0.96685082 | 520 | 14  |
| CHST5     | -0.002534783 | 0.954017112 | 0.96647915 | 520 | 431 |
| MOGAT1    | -0.0025588   | 0.953581921 | 0.96608681 | 520 | 65  |
| HOXC9     | -0.002581995 | 0.953161619 | 0.96570952 | 520 | 515 |
| FMR1NB    | -0.002595807 | 0.95291136  | 0.965553   | 520 | 87  |
| LOC653501 | -0.002611897 | 0.952619834 | 0.96530611 | 520 | 519 |
| CLNK      | -0.002624819 | 0.952385695 | 0.96516586 | 520 | 408 |
| C1orf124  | -0.002637234 | 0.952160758 | 0.96503491 | 520 | 520 |
| HIST1H2BB | -0.002646765 | 0.951988072 | 0.96495689 | 520 | 206 |
| FAM138D   | -0.002655727 | 0.951825693 | 0.96493782 | 520 | 31  |
| CLRN1OS   | -0.002678038 | 0.951421474 | 0.96467354 | 520 | 100 |
| HCG4P6    | -0.002713858 | 0.950772546 | 0.96406405 | 520 | 493 |
| IGSF8     | -0.002729468 | 0.950489742 | 0.96397119 | 520 | 520 |
| GFOD1     | -0.002768364 | 0.949785132 | 0.96335349 | 520 | 520 |
| PABPC1L2B | -0.002785472 | 0.94947522  | 0.96323296 | 520 | 76  |
| DAD1      | -0.002787302 | 0.949442078 | 0.96323296 | 520 | 520 |
| HIST1H3J  | -0.002794436 | 0.949312851 | 0.96316516 | 520 | 458 |
| TSPAN32   | -0.002807252 | 0.949080696 | 0.96297807 | 520 | 512 |
| C2orf28   | -0.002809958 | 0.949031668 | 0.96297678 | 520 | 520 |
| C10orf122 | -0.002828288 | 0.948699654 | 0.96273678 | 520 | 51  |
| FLJ44635  | -0.002842881 | 0.948435338 | 0.96256544 | 520 | 520 |

|              |              |             |            |     |     |
|--------------|--------------|-------------|------------|-----|-----|
| NPBWR2       | -0.002843191 | 0.948429723 | 0.96256544 | 520 | 23  |
| DHX16        | -0.002843966 | 0.948415668 | 0.96256544 | 520 | 520 |
| RFC1         | -0.002866569 | 0.948006271 | 0.96237217 | 520 | 520 |
| PDCL         | -0.002874334 | 0.947865636 | 0.9623263  | 520 | 520 |
| SNORA62      | -0.002896897 | 0.947456979 | 0.96195984 | 520 | 58  |
| OR4K13       | -0.002940001 | 0.946676322 | 0.96136087 | 520 | 8   |
| DEFB107A     | -0.002965351 | 0.946217244 | 0.96103987 | 520 | 9   |
| CRYZ         | -0.002965362 | 0.946217037 | 0.96103987 | 520 | 520 |
| RFX6         | -0.00297486  | 0.94604504  | 0.96096177 | 520 | 76  |
| LIPF         | -0.002979674 | 0.945957852 | 0.96092162 | 520 | 87  |
| TRAPPC1      | -0.003021109 | 0.945207515 | 0.96020779 | 520 | 520 |
| LOC100134868 | -0.003024789 | 0.945140877 | 0.96018846 | 520 | 399 |
| SLC36A3      | -0.003054564 | 0.944601732 | 0.95973852 | 520 | 170 |
| DIS3         | -0.00306423  | 0.944426714 | 0.95965633 | 520 | 520 |
| SLC28A1      | -0.003065878 | 0.944396867 | 0.95965633 | 520 | 332 |
| RBM4B        | -0.003077386 | 0.944188494 | 0.95959603 | 520 | 520 |
| SNORA75      | -0.00316974  | 0.942516409 | 0.9582464  | 520 | 14  |
| MPPED1       | -0.003222434 | 0.941562493 | 0.95742139 | 520 | 335 |
| ISCA1        | -0.003231541 | 0.941397639 | 0.95730203 | 520 | 520 |
| OR2A14       | -0.003282847 | 0.940468935 | 0.95659885 | 520 | 61  |
| ADM          | -0.00328934  | 0.940351407 | 0.95652756 | 520 | 520 |
| EML3         | -0.003304109 | 0.940084101 | 0.95635214 | 520 | 520 |
| MYH7B        | -0.003322093 | 0.939758591 | 0.95606923 | 520 | 517 |
| CPA5         | -0.003332909 | 0.939562841 | 0.95595223 | 520 | 462 |
| PPP2R5C      | -0.003340317 | 0.939428771 | 0.95591676 | 520 | 520 |
| OR51A2       | -0.003364332 | 0.938994126 | 0.95553255 | 520 | 3   |
| UGT1A10      | -0.003393121 | 0.93847313  | 0.95514699 | 520 | 351 |
| C4orf10      | -0.003404378 | 0.938269409 | 0.95498785 | 520 | 520 |
| LYZL4        | -0.003447146 | 0.937495486 | 0.95429648 | 520 | 23  |
| MAGEB16      | -0.003455959 | 0.937336007 | 0.95418231 | 520 | 58  |
| SS18         | -0.003488301 | 0.936750813 | 0.95368289 | 520 | 520 |
| PRR5         | -0.003503329 | 0.936478888 | 0.95345419 | 520 | 520 |
| ARC          | -0.003514    | 0.936285813 | 0.95335389 | 520 | 520 |
| OR4B1        | -0.003519745 | 0.936181869 | 0.95329619 | 520 | 11  |
| TBC1D17      | -0.003538921 | 0.935834928 | 0.95299103 | 520 | 520 |
| ARTN         | -0.003556055 | 0.935524948 | 0.95272349 | 520 | 520 |
| TP53I3       | -0.003576441 | 0.935156145 | 0.95254034 | 520 | 520 |
| C20orf195    | -0.003583298 | 0.935032092 | 0.95254034 | 520 | 514 |
| ZNF714       | -0.003596596 | 0.934791513 | 0.95236136 | 520 | 520 |
| C18orf18     | -0.003610991 | 0.934531114 | 0.95219229 | 520 | 518 |
| CRYBA2       | -0.003624897 | 0.934279565 | 0.95198409 | 520 | 412 |
| ARL5C        | -0.003626872 | 0.934243836 | 0.95198409 | 520 | 136 |
| LOC441455    | -0.003634997 | 0.934096865 | 0.95193564 | 520 | 469 |
| KCNA2        | -0.003659971 | 0.933645112 | 0.95152995 | 520 | 349 |
| ONECUT2      | -0.003677314 | 0.933331414 | 0.95133002 | 520 | 503 |
| LOC284276    | -0.003690998 | 0.933083901 | 0.95115028 | 520 | 443 |

|            |              |             |            |     |     |
|------------|--------------|-------------|------------|-----|-----|
| GIT1       | -0.003699475 | 0.932930595 | 0.95104209 | 520 | 520 |
| PRAMEF13   | -0.003708796 | 0.932762    | 0.9509183  | 520 | 18  |
| PIGC       | -0.003715591 | 0.932639098 | 0.95088915 | 520 | 520 |
| FGF12      | -0.00372822  | 0.932410691 | 0.95075242 | 520 | 519 |
| C8ORFK29   | -0.003766607 | 0.931716454 | 0.95023674 | 520 | 506 |
| HMMR       | -0.003767154 | 0.931706561 | 0.95023674 | 520 | 519 |
| HIST1H4G   | -0.003768673 | 0.931679098 | 0.95023674 | 520 | 10  |
| FAM27L     | -0.003834876 | 0.930481935 | 0.94936182 | 520 | 11  |
| MAFF       | -0.003843493 | 0.930326131 | 0.94925089 | 520 | 520 |
| KLHL26     | -0.00388095  | 0.929648867 | 0.94865586 | 520 | 520 |
| TARP       | -0.003887326 | 0.929533582 | 0.94858622 | 520 | 502 |
| OR1N1      | -0.003888964 | 0.929503963 | 0.94858622 | 520 | 38  |
| PRDXDD1P   | -0.003944238 | 0.928504671 | 0.94777605 | 520 | 519 |
| NET1       | -0.003955185 | 0.92830676  | 0.94770149 | 520 | 520 |
| IFIH1      | -0.003955756 | 0.928296436 | 0.94770149 | 520 | 520 |
| NCRNA00051 | -0.003972836 | 0.927987676 | 0.94751742 | 520 | 58  |
| PTPLAD1    | -0.004004477 | 0.927415729 | 0.94700009 | 520 | 520 |
| PNPT1      | -0.004025204 | 0.927041073 | 0.94666546 | 520 | 520 |
| SIPA1L2    | -0.004032438 | 0.926910327 | 0.94657988 | 520 | 520 |
| PALMD      | -0.004086335 | 0.925936201 | 0.94572878 | 520 | 520 |
| FLJ46321   | -0.004110327 | 0.925502607 | 0.94547748 | 520 | 36  |
| OR1B1      | -0.004140435 | 0.924958515 | 0.94496952 | 520 | 34  |
| ICOSLG     | -0.004182628 | 0.924196094 | 0.94433415 | 520 | 520 |
| ADSS       | -0.004212288 | 0.923660182 | 0.94388222 | 520 | 520 |
| OR4K15     | -0.004231569 | 0.923311835 | 0.94360158 | 520 | 18  |
| C13orf35   | -0.004236947 | 0.923214658 | 0.9435704  | 520 | 88  |
| GRB2       | -0.004338916 | 0.921372604 | 0.94202196 | 520 | 520 |
| ZNF517     | -0.004345329 | 0.921256773 | 0.9419513  | 520 | 520 |
| OR4K17     | -0.004353304 | 0.921112719 | 0.94185177 | 520 | 6   |
| LOC339788  | -0.004353648 | 0.921106508 | 0.94185177 | 520 | 63  |
| TUBB1      | -0.00435937  | 0.921003156 | 0.94185177 | 520 | 519 |
| TSPYL6     | -0.004366245 | 0.920878983 | 0.9418038  | 520 | 138 |
| GTF3A      | -0.004379756 | 0.920634953 | 0.94169752 | 520 | 520 |
| RNF133     | -0.00437988  | 0.920632722 | 0.94169752 | 520 | 282 |
| LOC90784   | -0.004407706 | 0.920130161 | 0.94137219 | 520 | 520 |
| GOLGA8G    | -0.004419143 | 0.919923601 | 0.94120862 | 520 | 286 |
| RPAP1      | -0.004419725 | 0.919913093 | 0.94120862 | 520 | 520 |
| RDH16      | -0.004446731 | 0.919425402 | 0.94079437 | 520 | 519 |
| AURKAPS1   | -0.004459548 | 0.919193945 | 0.94060526 | 520 | 520 |
| CA4        | -0.004464756 | 0.91909991  | 0.94055677 | 520 | 293 |
| OTUD7A     | -0.004491058 | 0.918624965 | 0.94016617 | 520 | 515 |
| C17orf100  | -0.004491623 | 0.918614761 | 0.94016617 | 520 | 520 |
| RAD52      | -0.004543109 | 0.917685156 | 0.93934735 | 520 | 520 |
| APPL2      | -0.004546285 | 0.917627824 | 0.93933635 | 520 | 520 |
| RREB1      | -0.004571244 | 0.917177211 | 0.93906577 | 520 | 520 |
| ADAM7      | -0.004578082 | 0.917053774 | 0.93898707 | 520 | 51  |

|           |              |             |            |     |     |
|-----------|--------------|-------------|------------|-----|-----|
| ICK       | -0.004604841 | 0.916570707 | 0.93854294 | 520 | 520 |
| CDY1B     | -0.004621465 | 0.91627061  | 0.9384711  | 520 | 11  |
| RPS4Y2    | -0.004633997 | 0.9160444   | 0.93828707 | 520 | 143 |
| FAM99A    | -0.004659652 | 0.915581335 | 0.93790805 | 520 | 18  |
| DDX17     | -0.00470475  | 0.914767386 | 0.93731234 | 520 | 520 |
| KCNJ16    | -0.004805407 | 0.912951003 | 0.93564137 | 520 | 344 |
| OR5D14    | -0.004809607 | 0.912875224 | 0.93561126 | 520 | 5   |
| SLC44A5   | -0.004975776 | 0.909877708 | 0.93291844 | 520 | 515 |
| NOM1      | -0.004986056 | 0.909692302 | 0.93277577 | 520 | 520 |
| PLSCR5    | -0.004990558 | 0.909611117 | 0.93273996 | 520 | 86  |
| ANGEL2    | -0.004994721 | 0.909536038 | 0.9327104  | 520 | 520 |
| ZNF181    | -0.005022858 | 0.909028625 | 0.93223747 | 520 | 520 |
| PTPN18    | -0.005036914 | 0.908775166 | 0.93211976 | 520 | 520 |
| FAM74A3   | -0.005063678 | 0.908292553 | 0.93168681 | 520 | 51  |
| UBR7      | -0.005092587 | 0.907771307 | 0.93133075 | 520 | 520 |
| TAB3      | -0.005095381 | 0.907720943 | 0.93133075 | 520 | 520 |
| WDR65     | -0.005106078 | 0.907528074 | 0.93121959 | 520 | 471 |
| CDK2      | -0.005129818 | 0.907100086 | 0.9309827  | 520 | 520 |
| CAB39L    | -0.005153325 | 0.906676316 | 0.93062974 | 520 | 520 |
| ZNF479    | -0.005166577 | 0.906437416 | 0.93043189 | 520 | 47  |
| ZBTB49    | -0.005174563 | 0.906293468 | 0.93040329 | 520 | 520 |
| HEPN1     | -0.005174964 | 0.90628624  | 0.93040329 | 520 | 202 |
| FAM189A2  | -0.005219833 | 0.905477496 | 0.92968319 | 520 | 517 |
| SEC61A2   | -0.005240506 | 0.905104891 | 0.92935093 | 520 | 520 |
| AMELY     | -0.005277453 | 0.904439054 | 0.92885347 | 520 | 45  |
| PRR25     | -0.005288394 | 0.904241883 | 0.9287929  | 520 | 80  |
| TMED3     | -0.005334199 | 0.903416522 | 0.92818153 | 520 | 520 |
| C21orf125 | -0.005354706 | 0.903047024 | 0.92784918 | 520 | 520 |
| ANKRD20A4 | -0.005394042 | 0.902338355 | 0.9272093  | 520 | 247 |
| YWHAZ     | -0.005481132 | 0.900769614 | 0.92588665 | 520 | 520 |
| WFDC11    | -0.005522614 | 0.900022549 | 0.92517033 | 520 | 16  |
| CHRN2     | -0.005530848 | 0.899874266 | 0.92510782 | 520 | 491 |
| SLC12A9   | -0.005604865 | 0.898541503 | 0.92383188 | 520 | 520 |
| CRCP      | -0.005617365 | 0.898316452 | 0.92364759 | 520 | 520 |
| ZNF670    | -0.005655922 | 0.897622328 | 0.92302803 | 520 | 520 |
| DSCAML1   | -0.005690743 | 0.89699553  | 0.92247758 | 520 | 474 |
| ZNF277    | -0.005706185 | 0.89671757  | 0.9222858  | 520 | 520 |
| CREBZF    | -0.00575465  | 0.895845312 | 0.9215767  | 520 | 520 |
| LOC286467 | -0.005762943 | 0.895696084 | 0.92151721 | 520 | 495 |
| SCML4     | -0.005791502 | 0.895182153 | 0.92103546 | 520 | 505 |
| C12orf5   | -0.005811348 | 0.894825047 | 0.92071502 | 520 | 520 |
| OXCT2     | -0.005825607 | 0.894568494 | 0.92049802 | 520 | 508 |
| KLHL2     | -0.0058262   | 0.894557825 | 0.92049802 | 520 | 520 |
| HIST2H3D  | -0.005884098 | 0.893516169 | 0.91962776 | 520 | 429 |
| SLC46A2   | -0.005893775 | 0.893342094 | 0.91956455 | 520 | 502 |
| KLHL35    | -0.005911792 | 0.893017994 | 0.91937174 | 520 | 514 |

|              |              |             |            |     |     |
|--------------|--------------|-------------|------------|-----|-----|
| DEPDC5       | -0.005937035 | 0.892563944 | 0.91913893 | 520 | 520 |
| IL4          | -0.005974387 | 0.891892151 | 0.91868172 | 520 | 51  |
| LOC100240726 | -0.005979042 | 0.891808445 | 0.91864243 | 520 | 162 |
| C11orf94     | -0.006013969 | 0.89118034  | 0.91804232 | 520 | 74  |
| CHMP2B       | -0.006083546 | 0.889929326 | 0.91689413 | 520 | 520 |
| BATF         | -0.006112398 | 0.889410649 | 0.91645339 | 520 | 520 |
| SHARPIN      | -0.006137701 | 0.888955806 | 0.91603152 | 520 | 520 |
| FLJ43390     | -0.0061441   | 0.888840786 | 0.91595981 | 520 | 142 |
| C9orf71      | -0.006146438 | 0.888798758 | 0.91595981 | 520 | 88  |
| DDI1         | -0.006150173 | 0.888731615 | 0.91594093 | 520 | 29  |
| C4orf17      | -0.006158254 | 0.888586365 | 0.91583804 | 520 | 136 |
| C14orf70     | -0.006162515 | 0.888509786 | 0.91580593 | 520 | 31  |
| FAM116A      | -0.006176081 | 0.888265958 | 0.91569503 | 520 | 520 |
| KIR3DL2      | -0.006187012 | 0.888069493 | 0.9155393  | 520 | 395 |
| PRAMEF18     | -0.006202621 | 0.887788964 | 0.91529689 | 520 | 66  |
| KRTAP10-5    | -0.006222603 | 0.887429875 | 0.91497346 | 520 | 9   |
| PHGR1        | -0.006249361 | 0.886949042 | 0.91457123 | 520 | 83  |
| LOC100131691 | -0.006281394 | 0.886373473 | 0.91405249 | 520 | 519 |
| FAM75A3      | -0.006286842 | 0.886275592 | 0.91401703 | 520 | 151 |
| PGAP1        | -0.006290241 | 0.886214522 | 0.9140008  | 520 | 520 |
| PLIN4        | -0.006292883 | 0.886167064 | 0.9139986  | 520 | 520 |
| FAM122C      | -0.006300551 | 0.886029293 | 0.91390325 | 520 | 520 |
| ZBTB33       | -0.006312387 | 0.885816655 | 0.91373066 | 520 | 520 |
| TRIM49L      | -0.006365164 | 0.884868588 | 0.91284612 | 520 | 90  |
| DEFB122      | -0.006379121 | 0.884617906 | 0.9126809  | 520 | 4   |
| OR10W1       | -0.006405115 | 0.884151038 | 0.91229258 | 520 | 42  |
| SPHKAP       | -0.006405148 | 0.884150445 | 0.91229258 | 520 | 124 |
| SH3GL2       | -0.006405569 | 0.884142892 | 0.91229258 | 520 | 346 |
| IRS4         | -0.006427256 | 0.883753405 | 0.91204942 | 520 | 242 |
| ANKRD43      | -0.006445651 | 0.883423071 | 0.9118214  | 520 | 485 |
| LOC647309    | -0.006465836 | 0.88306062  | 0.91149622 | 520 | 189 |
| ZBTB9        | -0.006502316 | 0.882405629 | 0.91100441 | 520 | 520 |
| HIST1H2BA    | -0.00650875  | 0.882290114 | 0.91093179 | 520 | 4   |
| PNMT         | -0.006512874 | 0.882216068 | 0.91090198 | 520 | 449 |
| ODAM         | -0.006523948 | 0.882017263 | 0.91074335 | 520 | 291 |
| KLRA1        | -0.006597977 | 0.880688422 | 0.90955754 | 520 | 515 |
| OR4F29       | -0.006684191 | 0.879141269 | 0.90819225 | 520 | 197 |
| BTBD17       | -0.006718815 | 0.878520065 | 0.90759702 | 520 | 129 |
| RCHY1        | -0.006768464 | 0.877629405 | 0.9067698  | 520 | 520 |
| KIAA1731     | -0.006789459 | 0.87725282  | 0.90656652 | 520 | 520 |
| KRTAP19-7    | -0.006792592 | 0.877196629 | 0.90655491 | 520 | 3   |
| PSTPIP2      | -0.006795013 | 0.877153202 | 0.90655491 | 520 | 520 |
| WBP4         | -0.006824984 | 0.876615677 | 0.90614028 | 520 | 520 |
| JMJD6        | -0.006833644 | 0.876460367 | 0.90607264 | 520 | 520 |
| GABRQ        | -0.006841004 | 0.876328372 | 0.90598263 | 520 | 490 |
| DNAJC27      | -0.006850909 | 0.876150766 | 0.90584546 | 520 | 520 |

|              |              |             |            |     |     |
|--------------|--------------|-------------|------------|-----|-----|
| CHI3L2       | -0.006871185 | 0.875787176 | 0.90551598 | 520 | 520 |
| HDAC4        | -0.006880382 | 0.875622274 | 0.9053919  | 520 | 520 |
| ELSPBP1      | -0.00688233  | 0.875587336 | 0.9053919  | 520 | 81  |
| RFWD3        | -0.006884875 | 0.875541702 | 0.9053919  | 520 | 520 |
| ERCC5        | -0.00690883  | 0.875112204 | 0.90509656 | 520 | 520 |
| GPX6         | -0.006916299 | 0.874978299 | 0.90500448 | 520 | 34  |
| OR2J3        | -0.006935295 | 0.874637742 | 0.90477914 | 520 | 42  |
| ATXN3        | -0.006969891 | 0.874017587 | 0.90422335 | 520 | 520 |
| CRBN         | -0.007017317 | 0.873167566 | 0.90354874 | 520 | 520 |
| TOP2A        | -0.007019966 | 0.873120081 | 0.90354597 | 520 | 520 |
| SNORA78      | -0.007025976 | 0.87301239  | 0.9034809  | 520 | 3   |
| FCN2         | -0.007026256 | 0.873007359 | 0.9034809  | 520 | 65  |
| CHCHD3       | -0.007038997 | 0.872779028 | 0.90333212 | 520 | 520 |
| ABHD6        | -0.007067884 | 0.872261408 | 0.90293542 | 520 | 520 |
| GRK1         | -0.007070788 | 0.872209374 | 0.90292791 | 520 | 113 |
| PAX1         | -0.007082953 | 0.8719914   | 0.90274861 | 520 | 473 |
| PAK1         | -0.007103685 | 0.871619947 | 0.90241038 | 520 | 520 |
| FBXO4        | -0.007127446 | 0.871194275 | 0.90201599 | 520 | 520 |
| LOC100190940 | -0.007127685 | 0.871189989 | 0.90201599 | 520 | 230 |
| ZNF26        | -0.007215475 | 0.869617532 | 0.90061468 | 520 | 520 |
| C14orf106    | -0.007232976 | 0.869304123 | 0.90042885 | 520 | 520 |
| C10orf32     | -0.007236538 | 0.869240338 | 0.90040903 | 520 | 520 |
| RGPD8        | -0.007289663 | 0.868289116 | 0.89960856 | 520 | 85  |
| LOC100129716 | -0.007294005 | 0.868211381 | 0.89957424 | 520 | 519 |
| IFNA7        | -0.007320054 | 0.867745029 | 0.89918345 | 520 | 12  |
| FXYD4        | -0.007321528 | 0.867718643 | 0.89918345 | 520 | 203 |
| C6orf103     | -0.007336803 | 0.867445211 | 0.89901137 | 520 | 186 |
| GSTM3        | -0.007348328 | 0.867238921 | 0.89884377 | 520 | 520 |
| PCGEM1       | -0.007392907 | 0.866441025 | 0.89806296 | 520 | 15  |
| NOX3         | -0.0074057   | 0.866212093 | 0.89790158 | 520 | 16  |
| VMO1         | -0.00741206  | 0.866098268 | 0.89790101 | 520 | 520 |
| TCEANC       | -0.007418544 | 0.865982241 | 0.89786435 | 520 | 520 |
| FAM188B      | -0.007430793 | 0.865763056 | 0.89768326 | 520 | 520 |
| LOC339535    | -0.007445565 | 0.865498726 | 0.89745533 | 520 | 455 |
| ZNF80        | -0.0074574   | 0.865286959 | 0.89728188 | 520 | 453 |
| SCGN         | -0.00748521  | 0.864789405 | 0.89681205 | 520 | 109 |
| FAM154B      | -0.007487039 | 0.864756694 | 0.89681205 | 520 | 516 |
| C9orf66      | -0.007511487 | 0.864319334 | 0.89641678 | 520 | 503 |
| SMS          | -0.00752631  | 0.864054187 | 0.89618788 | 520 | 520 |
| FBXO33       | -0.007527594 | 0.86403121  | 0.89618788 | 520 | 520 |
| ITGAD        | -0.007569034 | 0.86329002  | 0.89557956 | 520 | 412 |
| LOC729603    | -0.007576412 | 0.863158077 | 0.89548876 | 520 | 520 |
| KAT2B        | -0.007604997 | 0.862646887 | 0.89509823 | 520 | 520 |
| POLA1        | -0.007608503 | 0.862584189 | 0.89509823 | 520 | 520 |
| IFNA17       | -0.007654064 | 0.861769552 | 0.89432431 | 520 | 10  |
| USP16        | -0.00765616  | 0.861732078 | 0.89432431 | 520 | 520 |



|           |              |             |            |     |     |
|-----------|--------------|-------------|------------|-----|-----|
| ZNF622    | -0.007688309 | 0.861157358 | 0.89385776 | 520 | 520 |
| STMN4     | -0.00771317  | 0.860712964 | 0.89350372 | 520 | 292 |
| OR52B2    | -0.007727373 | 0.86045909  | 0.89333215 | 520 | 33  |
| KCNJ13    | -0.007737064 | 0.860285884 | 0.89319832 | 520 | 331 |
| SNX4      | -0.007765113 | 0.859784602 | 0.8927698  | 520 | 520 |
| ZFYVE28   | -0.007782752 | 0.8594694   | 0.89252699 | 520 | 520 |
| IARS2     | -0.007815194 | 0.858889723 | 0.89207028 | 520 | 520 |
| HYAL3     | -0.007820917 | 0.858787463 | 0.89201382 | 520 | 520 |
| IL1B      | -0.007842337 | 0.858404787 | 0.89188819 | 520 | 520 |
| UBQLNL    | -0.007886826 | 0.857610054 | 0.89120022 | 520 | 497 |
| SNORA5B   | -0.007909208 | 0.857210285 | 0.89083071 | 520 | 6   |
| TRNT1     | -0.007917204 | 0.857067492 | 0.89075899 | 520 | 520 |
| C10orf140 | -0.007919619 | 0.857024348 | 0.89075899 | 520 | 519 |
| LQK1      | -0.007988521 | 0.85579398  | 0.88972569 | 520 | 518 |
| PUM2      | -0.008019634 | 0.855238514 | 0.88928576 | 520 | 520 |
| STARD6    | -0.008041422 | 0.854849573 | 0.88899391 | 520 | 97  |
| NCAPD3    | -0.008062632 | 0.854470976 | 0.88871681 | 520 | 520 |
| CNO       | -0.008134062 | 0.853196224 | 0.88771149 | 520 | 520 |
| FOXI2     | -0.008143681 | 0.85302458  | 0.8875787  | 520 | 342 |
| SERPINB7  | -0.008152792 | 0.852862013 | 0.88745534 | 520 | 518 |
| GHSR      | -0.008163075 | 0.852678547 | 0.88740182 | 520 | 84  |
| OR52J3    | -0.008179445 | 0.8523865   | 0.88714367 | 520 | 13  |
| SPACA3    | -0.008209885 | 0.851843484 | 0.88667004 | 520 | 168 |
| CDK5R1    | -0.008220016 | 0.851662761 | 0.88652769 | 520 | 520 |
| DUSP21    | -0.008257284 | 0.850998063 | 0.8859124  | 520 | 27  |
| SSX2IP    | -0.00825866  | 0.850973535 | 0.8859124  | 520 | 520 |
| ATP6V0E2  | -0.008266387 | 0.850835726 | 0.88584972 | 520 | 520 |
| OR13C4    | -0.008269448 | 0.850781135 | 0.88583863 | 520 | 12  |
| VEGFA     | -0.008272641 | 0.850724199 | 0.88582508 | 520 | 520 |
| C22orf46  | -0.008275727 | 0.85066916  | 0.88581352 | 520 | 520 |
| SDF2L1    | -0.008298451 | 0.850263946 | 0.88543729 | 520 | 520 |
| FAM105B   | -0.008310917 | 0.850041665 | 0.88535784 | 520 | 520 |
| CDH7      | -0.00833248  | 0.84965722  | 0.88507972 | 520 | 125 |
| KCNQ2     | -0.00834456  | 0.84944186  | 0.88499254 | 520 | 248 |
| RFPL1     | -0.008344818 | 0.849437257 | 0.88499254 | 520 | 425 |
| LRRC7     | -0.008383302 | 0.848751243 | 0.88436441 | 520 | 378 |
| SMYD2     | -0.008448887 | 0.84758238  | 0.88323778 | 520 | 520 |
| ZFP3      | -0.00845226  | 0.847522274 | 0.88323778 | 520 | 520 |
| AGBL5     | -0.008508254 | 0.846524622 | 0.88240914 | 520 | 520 |
| OR10V1    | -0.008527719 | 0.84617786  | 0.88213889 | 520 | 58  |
| TCEA1     | -0.008534381 | 0.846059188 | 0.88206078 | 520 | 520 |
| TOM1      | -0.00854114  | 0.845938796 | 0.88198086 | 520 | 520 |
| NIPAL3    | -0.0085521   | 0.845743583 | 0.88186853 | 520 | 520 |
| GPR35     | -0.008608695 | 0.844735675 | 0.88095424 | 520 | 520 |
| TRIM10    | -0.008666545 | 0.843705662 | 0.8800166  | 520 | 352 |
| GHRL      | -0.008678197 | 0.843498241 | 0.87984577 | 520 | 477 |

|           |              |             |            |     |     |
|-----------|--------------|-------------|------------|-----|-----|
| SLC27A3   | -0.008691384 | 0.8432635   | 0.87969192 | 520 | 520 |
| ZNF607    | -0.008713901 | 0.842862707 | 0.87936481 | 520 | 520 |
| CALY      | -0.008716332 | 0.842819433 | 0.87936481 | 520 | 200 |
| NOTO      | -0.008744741 | 0.842313837 | 0.87897408 | 520 | 181 |
| C17orf46  | -0.008762268 | 0.842001932 | 0.87878504 | 520 | 439 |
| RBM3      | -0.008767595 | 0.841907143 | 0.87873159 | 520 | 520 |
| ZNF75D    | -0.008777615 | 0.841728849 | 0.87862213 | 520 | 520 |
| KLRF1     | -0.008811569 | 0.841124718 | 0.87809675 | 520 | 464 |
| APOBEC3D  | -0.0088156   | 0.84105301  | 0.87806735 | 520 | 519 |
| DYRK1B    | -0.008822378 | 0.840932426 | 0.87798692 | 520 | 520 |
| CLDN16    | -0.00884624  | 0.840507944 | 0.87763462 | 520 | 495 |
| PPP1R3G   | -0.008905546 | 0.839453161 | 0.87666944 | 520 | 520 |
| SMR3B     | -0.008908824 | 0.839394868 | 0.87665397 | 520 | 96  |
| TUBA4B    | -0.008954422 | 0.838584095 | 0.87585257 | 520 | 444 |
| SART3     | -0.008962238 | 0.838445131 | 0.87576799 | 520 | 520 |
| OR51B5    | -0.008993037 | 0.837897609 | 0.87540764 | 520 | 146 |
| PNMA5     | -0.008996483 | 0.837836354 | 0.875389   | 520 | 428 |
| LCE4A     | -0.008999434 | 0.837783901 | 0.87537955 | 520 | 42  |
| RIPK3     | -0.009002692 | 0.837725989 | 0.8753644  | 520 | 519 |
| C6orf81   | -0.009010143 | 0.837593547 | 0.87527137 | 520 | 470 |
| TM2D2     | -0.009030569 | 0.837230497 | 0.87498268 | 520 | 520 |
| LOC728613 | -0.009058872 | 0.836727503 | 0.87479322 | 520 | 520 |
| IGFBP6    | -0.009107311 | 0.835866826 | 0.87401051 | 520 | 520 |
| KNG1      | -0.009181973 | 0.834540579 | 0.87303119 | 520 | 209 |
| TTF2      | -0.009256368 | 0.833219533 | 0.87173967 | 520 | 520 |
| LONRF1    | -0.009282807 | 0.83275016  | 0.87138424 | 520 | 520 |
| C10orf119 | -0.009298163 | 0.832477579 | 0.87114422 | 520 | 520 |
| DHX35     | -0.009331923 | 0.831878381 | 0.87060755 | 520 | 520 |
| DGKB      | -0.009344558 | 0.831654152 | 0.87041806 | 520 | 412 |
| CYP21A2   | -0.00935098  | 0.83154018  | 0.87034395 | 520 | 504 |
| MSTO1     | -0.009355197 | 0.831465352 | 0.87031081 | 520 | 520 |
| ALG5      | -0.0093645   | 0.831300254 | 0.87018317 | 520 | 520 |
| OR10Q1    | -0.009426463 | 0.830200913 | 0.86907752 | 520 | 64  |
| CBS       | -0.009463027 | 0.829552343 | 0.86844367 | 520 | 520 |
| CDNF      | -0.00950147  | 0.828870577 | 0.86782005 | 520 | 520 |
| C18orf62  | -0.009501742 | 0.828865759 | 0.86782005 | 520 | 65  |
| C11orf2   | -0.009506767 | 0.828776649 | 0.86781183 | 520 | 520 |
| HSD17B13  | -0.009510451 | 0.828711324 | 0.86778849 | 520 | 451 |
| KIF23     | -0.009517234 | 0.828591039 | 0.86770786 | 520 | 520 |
| FAM75A2   | -0.009524169 | 0.82846808  | 0.86768208 | 520 | 232 |
| SNORA8    | -0.009538747 | 0.8282096   | 0.86748836 | 520 | 520 |
| IRX6      | -0.009541637 | 0.828158367 | 0.86747976 | 520 | 486 |
| C9orf144  | -0.009552673 | 0.827962722 | 0.86731988 | 520 | 185 |
| ABCB7     | -0.00955872  | 0.827855519 | 0.86725263 | 520 | 520 |
| CIB4      | -0.009570936 | 0.827638954 | 0.86707081 | 520 | 30  |
| DDX43     | -0.009583851 | 0.827410025 | 0.86687601 | 520 | 473 |

|              |              |             |            |     |     |
|--------------|--------------|-------------|------------|-----|-----|
| POM121L10P   | -0.009648619 | 0.826262139 | 0.86594334 | 520 | 447 |
| LOC728392    | -0.009687009 | 0.825581945 | 0.86536541 | 520 | 520 |
| C16orf89     | -0.009700098 | 0.82535005  | 0.86521794 | 520 | 441 |
| IFT74        | -0.009710199 | 0.825171115 | 0.86520464 | 520 | 520 |
| C20orf203    | -0.009713948 | 0.825104706 | 0.86520464 | 520 | 289 |
| ZNF48        | -0.009747128 | 0.824517001 | 0.86469864 | 520 | 520 |
| PEX19        | -0.009759879 | 0.824291161 | 0.86450676 | 520 | 520 |
| XDH          | -0.009781435 | 0.823909434 | 0.86415136 | 520 | 520 |
| MYLK4        | -0.00978385  | 0.823866664 | 0.86415136 | 520 | 518 |
| LOC100133308 | -0.009806677 | 0.823462467 | 0.86377242 | 520 | 115 |
| ZNF613       | -0.009813903 | 0.823334519 | 0.86370208 | 520 | 520 |
| TMEM179B     | -0.009866535 | 0.822402783 | 0.86279551 | 520 | 520 |
| TSNARE1      | -0.009882434 | 0.822121381 | 0.86259005 | 520 | 520 |
| PDHA2        | -0.009924725 | 0.821372935 | 0.8618496  | 520 | 77  |
| TBL1XR1      | -0.009964898 | 0.820662135 | 0.86119821 | 520 | 520 |
| LOC285627    | -0.010020847 | 0.819672453 | 0.86028916 | 520 | 15  |
| BAZ1A        | -0.010024863 | 0.81960142  | 0.86025938 | 520 | 520 |
| PLEKHA1      | -0.010033882 | 0.819441918 | 0.8602263  | 520 | 520 |
| C19orf61     | -0.010037517 | 0.819377632 | 0.8602036  | 520 | 520 |
| LYN          | -0.010052559 | 0.819111629 | 0.85996912 | 520 | 520 |
| AADAACL3     | -0.010064771 | 0.818895672 | 0.85978716 | 520 | 213 |
| RBP5         | -0.010127736 | 0.817782481 | 0.85882321 | 520 | 515 |
| TET2         | -0.010168831 | 0.817056128 | 0.85821325 | 520 | 520 |
| OR5H15       | -0.010187351 | 0.816728844 | 0.85795886 | 520 | 3   |
| BTN1A1       | -0.010203979 | 0.816435032 | 0.8576949  | 520 | 329 |
| ZNF628       | -0.010220748 | 0.816138727 | 0.85756234 | 520 | 520 |
| HSD17B12     | -0.010253699 | 0.815556603 | 0.85703999 | 520 | 520 |
| SELV         | -0.010310524 | 0.814552935 | 0.85616375 | 520 | 129 |
| LPO          | -0.010311423 | 0.81453706  | 0.85616375 | 520 | 343 |
| CTNBNB1      | -0.010333533 | 0.814146638 | 0.85587054 | 520 | 520 |
| OSTN         | -0.010373547 | 0.81344015  | 0.85521702 | 520 | 32  |
| SLC22A24     | -0.010390838 | 0.813134919 | 0.85494069 | 520 | 12  |
| OR5V1        | -0.010411371 | 0.81277249  | 0.85460419 | 520 | 13  |
| OR9A2        | -0.010427284 | 0.812491635 | 0.85435343 | 520 | 18  |
| C7orf72      | -0.010450302 | 0.812085426 | 0.85401536 | 520 | 42  |
| CNOT1        | -0.010477259 | 0.811609756 | 0.85369323 | 520 | 520 |
| DAB2IP       | -0.010491572 | 0.811357229 | 0.85351665 | 520 | 520 |
| SNAP29       | -0.010501997 | 0.811173314 | 0.8533677  | 520 | 520 |
| FUZ          | -0.010543189 | 0.810446709 | 0.85273677 | 520 | 520 |
| SSBP4        | -0.010544665 | 0.810420676 | 0.85273677 | 520 | 520 |
| YRDC         | -0.010548342 | 0.810355826 | 0.85273014 | 520 | 520 |
| C20orf173    | -0.010563132 | 0.810094987 | 0.85272235 | 520 | 74  |
| STOML1       | -0.010571266 | 0.809951538 | 0.85261617 | 520 | 520 |
| OR56A4       | -0.010591543 | 0.809593964 | 0.85228426 | 520 | 31  |
| FLJ35390     | -0.01059847  | 0.809471821 | 0.85224466 | 520 | 520 |
| LOC149620    | -0.010628094 | 0.808949526 | 0.8518282  | 520 | 45  |

|            |              |             |            |     |     |
|------------|--------------|-------------|------------|-----|-----|
| SLITRK1    | -0.010630099 | 0.808914178 | 0.8518282  | 520 | 178 |
| HRNBP3     | -0.010652387 | 0.808521285 | 0.85146619 | 520 | 386 |
| C19orf40   | -0.010706988 | 0.807558984 | 0.85064316 | 520 | 520 |
| ASNSD1     | -0.010713728 | 0.80744021  | 0.85060214 | 520 | 520 |
| COL9A1     | -0.010714236 | 0.80743126  | 0.85060214 | 520 | 341 |
| LRRC37A3   | -0.010718211 | 0.807361217 | 0.85060214 | 520 | 520 |
| TBX20      | -0.01073965  | 0.806983472 | 0.85033522 | 520 | 164 |
| IL2        | -0.010775115 | 0.80635868  | 0.84976568 | 520 | 184 |
| XAGE5      | -0.010825818 | 0.805465672 | 0.84900208 | 520 | 17  |
| OR11H12    | -0.01084735  | 0.805086523 | 0.84873554 | 520 | 50  |
| ZNF821     | -0.010859395 | 0.804874426 | 0.84855631 | 520 | 520 |
| NCRNA00164 | -0.010869815 | 0.804690968 | 0.84840725 | 520 | 224 |
| AS3MT      | -0.010883254 | 0.804454381 | 0.84820216 | 520 | 519 |
| LCE1F      | -0.010900844 | 0.804144726 | 0.84792    | 520 | 374 |
| IL9        | -0.010922949 | 0.803755643 | 0.84759839 | 520 | 29  |
| SNORA18    | -0.010927896 | 0.803668575 | 0.8475509  | 520 | 134 |
| PPP2R1A    | -0.010932447 | 0.803588477 | 0.84751075 | 520 | 520 |
| RLN2       | -0.010937098 | 0.803506628 | 0.84746875 | 520 | 415 |
| WDHD1      | -0.010939253 | 0.803468708 | 0.84746875 | 520 | 520 |
| FKSG83     | -0.010942465 | 0.803412183 | 0.84746875 | 520 | 29  |
| C9orf171   | -0.010943453 | 0.803394784 | 0.84746875 | 520 | 259 |
| KREMEN1    | -0.010965385 | 0.803008847 | 0.8471653  | 520 | 520 |
| CER1       | -0.011017937 | 0.802084258 | 0.84627842 | 520 | 138 |
| DCAKD      | -0.011034381 | 0.801794998 | 0.84606177 | 520 | 520 |
| SPATA1     | -0.011077694 | 0.801033248 | 0.84547919 | 520 | 464 |
| OR2V2      | -0.011079772 | 0.800996713 | 0.84547919 | 520 | 38  |
| GLYR1      | -0.01109686  | 0.800696224 | 0.84521195 | 520 | 520 |
| RAX        | -0.011104616 | 0.800559849 | 0.84511223 | 520 | 240 |
| FBXO15     | -0.011107421 | 0.800510536 | 0.84510442 | 520 | 495 |
| TNFAIP8L3  | -0.011145485 | 0.799841364 | 0.84457485 | 520 | 520 |
| CDH12      | -0.011159735 | 0.79959088  | 0.84435457 | 520 | 430 |
| GFRA4      | -0.011163034 | 0.79953291  | 0.84433757 | 520 | 43  |
| LHFPL1     | -0.011169354 | 0.799421817 | 0.84430869 | 520 | 376 |
| VIL1       | -0.011205965 | 0.798778419 | 0.84378485 | 520 | 307 |
| TRIM39     | -0.011225063 | 0.798442839 | 0.84358089 | 520 | 520 |
| LOC93432   | -0.01124429  | 0.79810505  | 0.84327134 | 520 | 80  |
| CDADC1     | -0.011277756 | 0.797517156 | 0.84282683 | 520 | 520 |
| SLC37A4    | -0.011287307 | 0.797349402 | 0.84273788 | 520 | 520 |
| IFT20      | -0.011297903 | 0.7971633   | 0.84258535 | 520 | 520 |
| PTBP2      | -0.011303097 | 0.797072086 | 0.84253311 | 520 | 520 |
| HIATL1     | -0.011307502 | 0.796994721 | 0.84249549 | 520 | 520 |
| OR7A17     | -0.011324918 | 0.796688884 | 0.84221635 | 520 | 5   |
| CD247      | -0.011335274 | 0.796507035 | 0.84206826 | 520 | 520 |
| ELL2       | -0.011354075 | 0.796176931 | 0.84180754 | 520 | 520 |
| TATDN2     | -0.011355122 | 0.79615855  | 0.84180754 | 520 | 520 |
| UBN1       | -0.011374272 | 0.79582235  | 0.84152089 | 520 | 520 |

|            |              |             |            |     |     |
|------------|--------------|-------------|------------|-----|-----|
| OR52E6     | -0.01139824  | 0.795401631 | 0.84116424 | 520 | 26  |
| OR6N1      | -0.011427599 | 0.794886348 | 0.84070749 | 520 | 15  |
| GSDMA      | -0.011453567 | 0.794430669 | 0.84035778 | 520 | 519 |
| MAP1LC3A   | -0.011460276 | 0.794312952 | 0.84028558 | 520 | 520 |
| RNASET2    | -0.011467064 | 0.79419385  | 0.84026091 | 520 | 520 |
| LOC90110   | -0.011467636 | 0.794183813 | 0.84026091 | 520 | 520 |
| GTF2H2     | -0.011513256 | 0.793383512 | 0.83960245 | 520 | 520 |
| LTK        | -0.011532622 | 0.793043833 | 0.83933109 | 520 | 517 |
| SPATA18    | -0.011559502 | 0.792572445 | 0.83892025 | 520 | 520 |
| FAM75A5    | -0.011570952 | 0.792371658 | 0.83875175 | 520 | 68  |
| OR10H4     | -0.01158397  | 0.792143414 | 0.83859819 | 520 | 21  |
| MTMR4      | -0.011598451 | 0.791889513 | 0.83841744 | 520 | 520 |
| OR8J1      | -0.011621754 | 0.79148101  | 0.83811696 | 520 | 7   |
| TTC23      | -0.011625539 | 0.791414672 | 0.83809072 | 520 | 520 |
| CLCA2      | -0.011644729 | 0.791078305 | 0.83786007 | 520 | 520 |
| CA6        | -0.011703931 | 0.790040869 | 0.83698755 | 520 | 331 |
| IQGAP3     | -0.011719546 | 0.789767301 | 0.83678566 | 520 | 520 |
| PKHD1L1    | -0.011722488 | 0.789715764 | 0.83677502 | 520 | 438 |
| ALDH8A1    | -0.011739487 | 0.789417985 | 0.83650346 | 520 | 512 |
| SP140L     | -0.011758704 | 0.789081391 | 0.83619073 | 520 | 520 |
| GPHB5      | -0.011830707 | 0.787820553 | 0.83494238 | 520 | 22  |
| ACSM3      | -0.0118633   | 0.787250003 | 0.83446928 | 520 | 518 |
| NBPF22P    | -0.011863597 | 0.787244809 | 0.83446928 | 520 | 95  |
| INSL3      | -0.011873355 | 0.787074012 | 0.83437045 | 520 | 494 |
| C3orf17    | -0.011934153 | 0.786010094 | 0.83337404 | 520 | 520 |
| ZMYM6      | -0.011992189 | 0.784994883 | 0.83258948 | 520 | 520 |
| UPF1       | -0.012008188 | 0.784715093 | 0.83243872 | 520 | 520 |
| AQP8       | -0.012039799 | 0.78416233  | 0.83207121 | 520 | 335 |
| CENPO      | -0.012046885 | 0.784038443 | 0.83198354 | 520 | 520 |
| DDX59      | -0.01212922  | 0.782599297 | 0.8305438  | 520 | 520 |
| LOC286135  | -0.012133118 | 0.782531172 | 0.83051521 | 520 | 55  |
| FLJ39609   | -0.012151045 | 0.782217926 | 0.83027016 | 520 | 32  |
| GTF2H2B    | -0.012158119 | 0.782094329 | 0.83019853 | 520 | 517 |
| MUT        | -0.012179025 | 0.781729105 | 0.82988237 | 520 | 520 |
| GPR149     | -0.012180641 | 0.781700875 | 0.82988237 | 520 | 210 |
| PPP1R2     | -0.012190312 | 0.781531928 | 0.82976041 | 520 | 520 |
| NCRNA00169 | -0.012222707 | 0.78096611  | 0.82920334 | 520 | 511 |
| OR6C1      | -0.012272177 | 0.780102275 | 0.82832977 | 520 | 4   |
| FAM71F2    | -0.012281803 | 0.779934219 | 0.82819493 | 520 | 493 |
| TMEM178    | -0.012298522 | 0.779642367 | 0.82797223 | 520 | 494 |
| CIZ1       | -0.012300579 | 0.779606456 | 0.82797223 | 520 | 520 |
| ANO8       | -0.012316447 | 0.779329471 | 0.82772712 | 520 | 520 |
| RBM19      | -0.012332179 | 0.779054911 | 0.8274791  | 520 | 520 |
| SFMBT1     | -0.012354708 | 0.778661759 | 0.82714865 | 520 | 520 |
| OR51I2     | -0.012355358 | 0.778650414 | 0.82714865 | 520 | 27  |
| LOC285401  | -0.01237363  | 0.778331583 | 0.82688504 | 520 | 120 |

|           |              |             |            |     |     |
|-----------|--------------|-------------|------------|-----|-----|
| H2AFY2    | -0.012382654 | 0.778174148 | 0.82680491 | 520 | 520 |
| OR13C5    | -0.012401558 | 0.777844347 | 0.82649805 | 520 | 5   |
| OR51A4    | -0.012402379 | 0.777830025 | 0.82649805 | 520 | 8   |
| C11orf36  | -0.012406202 | 0.777763331 | 0.82649805 | 520 | 57  |
| RND2      | -0.012407193 | 0.777746043 | 0.82649805 | 520 | 518 |
| IL34      | -0.012412794 | 0.777648346 | 0.82646399 | 520 | 520 |
| ETV4      | -0.012422367 | 0.777481372 | 0.82637364 | 520 | 520 |
| AAA1      | -0.012425195 | 0.777432037 | 0.82636476 | 520 | 168 |
| MTERFD1   | -0.012431535 | 0.777321466 | 0.82636476 | 520 | 520 |
| PHGDH     | -0.012468832 | 0.776671037 | 0.82581706 | 520 | 520 |
| INE1      | -0.012483022 | 0.776423603 | 0.82559751 | 520 | 519 |
| RMND1     | -0.012490398 | 0.776295003 | 0.82550429 | 520 | 520 |
| SNORA16A  | -0.012594564 | 0.774479525 | 0.82379096 | 520 | 34  |
| SPIN2B    | -0.012615578 | 0.774113432 | 0.82348843 | 520 | 519 |
| IRF2BP2   | -0.012637309 | 0.773734885 | 0.82318146 | 520 | 520 |
| C17orf97  | -0.012642531 | 0.773643926 | 0.82316269 | 520 | 520 |
| HIST1H2AG | -0.012696317 | 0.772707282 | 0.82233966 | 520 | 517 |
| FOXD2     | -0.012709226 | 0.772482533 | 0.82214387 | 520 | 520 |
| SGK3      | -0.012733691 | 0.772056634 | 0.82182072 | 520 | 520 |
| WBSCR28   | -0.012760673 | 0.771586984 | 0.82145089 | 520 | 341 |
| SMG7      | -0.012794835 | 0.770992495 | 0.82090467 | 520 | 520 |
| MFSD9     | -0.01280754  | 0.770771442 | 0.82071832 | 520 | 520 |
| C17orf88  | -0.012812149 | 0.77069125  | 0.82071832 | 520 | 192 |
| SCARNA21  | -0.012851594 | 0.770005073 | 0.82011316 | 520 | 10  |
| BAHD1     | -0.012855093 | 0.769944222 | 0.82009166 | 520 | 520 |
| TUBGCP6   | -0.012859593 | 0.769865956 | 0.82005162 | 520 | 520 |
| ATXN8OS   | -0.012907777 | 0.769028038 | 0.81928892 | 520 | 3   |
| APOC3     | -0.012924533 | 0.768736727 | 0.81908179 | 520 | 60  |
| BPIL2     | -0.012931314 | 0.768618826 | 0.81902605 | 520 | 471 |
| FAHD2A    | -0.012932645 | 0.768595699 | 0.81902605 | 520 | 520 |
| IL1RL2    | -0.0129331   | 0.768587783 | 0.81902605 | 520 | 520 |
| SSBP2     | -0.012945741 | 0.768368046 | 0.81888865 | 520 | 520 |
| AGBL3     | -0.012948885 | 0.768313401 | 0.81887369 | 520 | 495 |
| MIPOL1    | -0.012950703 | 0.768281787 | 0.81887369 | 520 | 519 |
| NRD1      | -0.012956557 | 0.768180048 | 0.81886141 | 520 | 520 |
| NPVF      | -0.01299718  | 0.767474054 | 0.81823861 | 520 | 10  |
| GUSB      | -0.013033344 | 0.766845713 | 0.81769841 | 520 | 520 |
| ID2B      | -0.013035683 | 0.766805087 | 0.81769833 | 520 | 481 |
| GSTT1     | -0.013042767 | 0.766682031 | 0.81765359 | 520 | 473 |
| LAT       | -0.013052364 | 0.766515315 | 0.81751903 | 520 | 520 |
| SPG7      | -0.013079519 | 0.76604367  | 0.8171889  | 520 | 520 |
| E2F4      | -0.013111764 | 0.765483743 | 0.81663479 | 520 | 520 |
| MAK16     | -0.013155623 | 0.764722308 | 0.81595198 | 520 | 520 |
| MC4R      | -0.013175304 | 0.764380719 | 0.81571701 | 520 | 235 |
| GNPDA1    | -0.013178566 | 0.764324097 | 0.81569975 | 520 | 520 |
| SMPD4     | -0.013179694 | 0.764304528 | 0.81569975 | 520 | 520 |

|              |              |             |            |     |     |
|--------------|--------------|-------------|------------|-----|-----|
| CSF3         | -0.013224756 | 0.763522572 | 0.8150169  | 520 | 514 |
| GC           | -0.013231127 | 0.763412045 | 0.81494206 | 520 | 72  |
| SCP2         | -0.013243172 | 0.763203088 | 0.81476213 | 520 | 520 |
| OR2A5        | -0.013261455 | 0.76288593  | 0.81446666 | 520 | 17  |
| HAUS2        | -0.013290978 | 0.762373891 | 0.81401289 | 520 | 520 |
| C1orf89      | -0.013293549 | 0.762329309 | 0.81401289 | 520 | 520 |
| DDX52        | -0.01332184  | 0.761838733 | 0.81360713 | 520 | 520 |
| AFM          | -0.013322    | 0.761835962 | 0.81360713 | 520 | 54  |
| FAM157B      | -0.013322506 | 0.761827196 | 0.81360713 | 520 | 451 |
| KLHL32       | -0.013324644 | 0.761790132 | 0.81360713 | 520 | 440 |
| LOC200726    | -0.013383948 | 0.760762123 | 0.81267257 | 520 | 168 |
| CCL27        | -0.01338683  | 0.760712169 | 0.81266226 | 520 | 431 |
| SLC7A4       | -0.013392663 | 0.760611086 | 0.81259733 | 520 | 501 |
| RPGRIP1      | -0.013415026 | 0.760223559 | 0.81229656 | 520 | 474 |
| PHOX2B       | -0.013427194 | 0.760012736 | 0.81220578 | 520 | 71  |
| C20orf43     | -0.013438729 | 0.759812896 | 0.81209899 | 520 | 520 |
| CSTT         | -0.01347134  | 0.759247998 | 0.81165712 | 520 | 43  |
| LCN8         | -0.013478072 | 0.759131386 | 0.81157549 | 520 | 123 |
| CD320        | -0.013486871 | 0.758979007 | 0.8114556  | 520 | 520 |
| PPP3R2       | -0.013510474 | 0.758570259 | 0.8110616  | 520 | 141 |
| C1orf123     | -0.013518921 | 0.758423998 | 0.81094822 | 520 | 520 |
| SP1          | -0.013525346 | 0.758312757 | 0.81094822 | 520 | 520 |
| RTEL1        | -0.013566361 | 0.757602735 | 0.81041387 | 520 | 520 |
| GOLGA8E      | -0.013585126 | 0.757277953 | 0.81010943 | 520 | 64  |
| TGFA         | -0.01363606  | 0.756396611 | 0.80933835 | 520 | 520 |
| LOC154761    | -0.013724233 | 0.754871642 | 0.80783525 | 520 | 520 |
| NSUN2        | -0.013762516 | 0.754209825 | 0.80721268 | 520 | 520 |
| ITIH2        | -0.013830839 | 0.753029143 | 0.80612018 | 520 | 215 |
| PRMT3        | -0.013886417 | 0.752069137 | 0.80522073 | 520 | 520 |
| LOC441089    | -0.013908163 | 0.751693618 | 0.80490415 | 520 | 520 |
| C3P1         | -0.01391057  | 0.751652056 | 0.80490239 | 520 | 33  |
| C22orf40     | -0.01391617  | 0.75155536  | 0.80484159 | 520 | 520 |
| KIF5B        | -0.013961455 | 0.750773594 | 0.80413252 | 520 | 520 |
| RTP3         | -0.01397517  | 0.750536885 | 0.80404982 | 520 | 351 |
| PIGW         | -0.014050416 | 0.749238589 | 0.80291491 | 520 | 520 |
| PROKR2       | -0.01405779  | 0.749111396 | 0.80282127 | 520 | 43  |
| MT1G         | -0.01409686  | 0.748437587 | 0.80218442 | 520 | 520 |
| FAM120C      | -0.014180686 | 0.746992572 | 0.80084848 | 520 | 520 |
| ST8SIA6      | -0.014199123 | 0.74667487  | 0.80059301 | 520 | 433 |
| TRIM43       | -0.014199322 | 0.746671437 | 0.80059301 | 520 | 125 |
| ZBTB8B       | -0.014202488 | 0.746616889 | 0.80059301 | 520 | 206 |
| C2orf62      | -0.014219667 | 0.746320906 | 0.80034116 | 520 | 372 |
| DKFZp434L192 | -0.01422281  | 0.746266766 | 0.80034116 | 520 | 14  |
| PARP1        | -0.01422462  | 0.746235576 | 0.80034116 | 520 | 520 |
| ANKFN1       | -0.014287311 | 0.745155828 | 0.79934682 | 520 | 335 |
| UPK3A        | -0.014292292 | 0.745070047 | 0.79931499 | 520 | 394 |

|           |              |             |            |     |     |
|-----------|--------------|-------------|------------|-----|-----|
| PAH       | -0.014309054 | 0.744781451 | 0.7991976  | 520 | 253 |
| LOC440925 | -0.014345324 | 0.744157069 | 0.79857281 | 520 | 461 |
| SERTAD2   | -0.014359261 | 0.743917206 | 0.7983579  | 520 | 520 |
| PEX2      | -0.014370078 | 0.74373105  | 0.79824309 | 520 | 520 |
| DCAF16    | -0.014374654 | 0.743652296 | 0.79824309 | 520 | 520 |
| COPS2     | -0.014377511 | 0.74360314  | 0.79823327 | 520 | 520 |
| VHL       | -0.014400405 | 0.743209202 | 0.79789534 | 520 | 520 |
| PRAMEF4   | -0.014427921 | 0.742735847 | 0.79751454 | 520 | 98  |
| CXCR5     | -0.014480918 | 0.741824383 | 0.79666313 | 520 | 515 |
| DNAJA2    | -0.014482004 | 0.741805724 | 0.79666313 | 520 | 520 |
| GJB6      | -0.014522622 | 0.741107414 | 0.79610516 | 520 | 520 |
| CDKN1B    | -0.01454086  | 0.740793926 | 0.7958108  | 520 | 520 |
| ZNF595    | -0.014548058 | 0.740670218 | 0.7957203  | 520 | 520 |
| CDC14B    | -0.014575833 | 0.740192925 | 0.79534883 | 520 | 520 |
| GPR148    | -0.01462137  | 0.739410627 | 0.79470412 | 520 | 32  |
| POLR1B    | -0.014626664 | 0.739319683 | 0.79465043 | 520 | 520 |
| TTY2      | -0.01464311  | 0.739037226 | 0.79438918 | 520 | 53  |
| DDX42     | -0.014664737 | 0.738665842 | 0.79411698 | 520 | 520 |
| OR3A2     | -0.014665548 | 0.73865191  | 0.79411698 | 520 | 179 |
| ESPNP     | -0.014676878 | 0.738457376 | 0.79401986 | 520 | 280 |
| NMUR2     | -0.01469951  | 0.738068839 | 0.79368674 | 520 | 293 |
| KIAA1486  | -0.014700172 | 0.738057463 | 0.79368674 | 520 | 416 |
| TTLL8     | -0.014707142 | 0.737937826 | 0.7936305  | 520 | 51  |
| LOC415056 | -0.014715086 | 0.737801466 | 0.7935685  | 520 | 67  |
| OR9G9     | -0.014738017 | 0.73740789  | 0.79322981 | 520 | 23  |
| ZNF200    | -0.014763671 | 0.736967687 | 0.79288317 | 520 | 520 |
| OR4P4     | -0.014773182 | 0.736804495 | 0.7927499  | 520 | 4   |
| GKN1      | -0.014791752 | 0.736485917 | 0.7924917  | 520 | 197 |
| HIST1H4K  | -0.014794891 | 0.736432071 | 0.79247605 | 520 | 180 |
| ACSL5     | -0.014815814 | 0.736073179 | 0.79213212 | 520 | 520 |
| SASH1     | -0.014818506 | 0.736027007 | 0.79212471 | 520 | 520 |
| C11orf58  | -0.014836788 | 0.735713473 | 0.79189793 | 520 | 520 |
| SLC3A1    | -0.014846704 | 0.735543439 | 0.79177332 | 520 | 486 |
| TTC27     | -0.014879204 | 0.734986223 | 0.79129258 | 520 | 520 |
| RXRБ      | -0.014890594 | 0.734790968 | 0.79113227 | 520 | 520 |
| STYX      | -0.014907735 | 0.734497176 | 0.79085818 | 520 | 520 |
| FAM76A    | -0.014924827 | 0.734204249 | 0.79062721 | 520 | 520 |
| FLJ35220  | -0.014936729 | 0.734000294 | 0.79049201 | 520 | 520 |
| TTC21A    | -0.014939506 | 0.733952707 | 0.79048298 | 520 | 520 |
| EIF1AD    | -0.01497839  | 0.733286537 | 0.78984988 | 520 | 520 |
| LRRC28    | -0.015017489 | 0.732616862 | 0.78925503 | 520 | 520 |
| BEST4     | -0.015034666 | 0.732322732 | 0.78898031 | 520 | 513 |
| OR52D1    | -0.015038298 | 0.732260548 | 0.78895547 | 520 | 61  |
| LRIT2     | -0.015044767 | 0.732149791 | 0.78892045 | 520 | 402 |
| CLLU1     | -0.015056796 | 0.731943857 | 0.78878285 | 520 | 405 |
| FAM183B   | -0.01506283  | 0.73184056  | 0.78875583 | 520 | 387 |



|              |              |             |            |     |     |
|--------------|--------------|-------------|------------|-----|-----|
| CYP3A43      | -0.015081728 | 0.731517066 | 0.78844933 | 520 | 150 |
| SRR          | -0.015098633 | 0.731227747 | 0.78822176 | 520 | 520 |
| CHRNA5       | -0.015100315 | 0.731198948 | 0.78822176 | 520 | 520 |
| GNG4         | -0.015157397 | 0.730222283 | 0.78730628 | 520 | 520 |
| CHEK1        | -0.015189252 | 0.729677449 | 0.78684508 | 520 | 520 |
| LOC643837    | -0.015295174 | 0.727866738 | 0.78497646 | 520 | 520 |
| GNG13        | -0.015355283 | 0.726839876 | 0.78403677 | 520 | 148 |
| EFNA1        | -0.015371238 | 0.726567395 | 0.78382671 | 520 | 520 |
| CFDP1        | -0.01539657  | 0.726134837 | 0.78344389 | 520 | 520 |
| SCGBL        | -0.015454343 | 0.725148647 | 0.78254735 | 520 | 188 |
| FARP2        | -0.015473651 | 0.724819169 | 0.78229008 | 520 | 520 |
| USP17L2      | -0.015480506 | 0.724702198 | 0.7822749  | 520 | 148 |
| C7orf61      | -0.015504408 | 0.724294421 | 0.78191844 | 520 | 518 |
| SESN2        | -0.015540157 | 0.723684662 | 0.78134384 | 520 | 520 |
| ATOH1        | -0.015552961 | 0.723466297 | 0.7811499  | 520 | 62  |
| GPX5         | -0.015559157 | 0.723360651 | 0.78107766 | 520 | 27  |
| TRMT11       | -0.015581096 | 0.72298659  | 0.78084101 | 520 | 520 |
| ANKRD46      | -0.015586927 | 0.722887171 | 0.78077545 | 520 | 520 |
| FAM172A      | -0.015604385 | 0.722589576 | 0.78059114 | 520 | 520 |
| SCARNA9L     | -0.015627367 | 0.722197865 | 0.78028172 | 520 | 146 |
| SCGB1D4      | -0.01563009  | 0.722151462 | 0.78027339 | 520 | 8   |
| OR14J1       | -0.015648244 | 0.721842115 | 0.77998094 | 520 | 8   |
| TMEM49       | -0.015653253 | 0.721756761 | 0.77993051 | 520 | 520 |
| CCDC148      | -0.015667993 | 0.721505624 | 0.77974271 | 520 | 493 |
| LOC100129726 | -0.015691694 | 0.721101872 | 0.77943169 | 520 | 492 |
| OR6K2        | -0.015723005 | 0.720568618 | 0.77893881 | 520 | 11  |
| SNORA13      | -0.015772373 | 0.719728078 | 0.77815533 | 520 | 15  |
| TACR3        | -0.015802126 | 0.719221681 | 0.77767888 | 520 | 115 |
| LCA5L        | -0.015812055 | 0.719052716 | 0.77759192 | 520 | 520 |
| OSR2         | -0.015814443 | 0.719012074 | 0.77758967 | 520 | 520 |
| GYPB         | -0.015818393 | 0.718944859 | 0.77755869 | 520 | 7   |
| RDH14        | -0.01583657  | 0.718635599 | 0.77734353 | 520 | 520 |
| ZNF383       | -0.015840646 | 0.718566251 | 0.77734353 | 520 | 520 |
| GK2          | -0.015858131 | 0.718268802 | 0.77711929 | 520 | 13  |
| C12orf42     | -0.015868817 | 0.718087038 | 0.77696432 | 520 | 423 |
| LOC284749    | -0.0158692   | 0.718080517 | 0.77696432 | 520 | 419 |
| SSPO         | -0.015886663 | 0.717783511 | 0.77671926 | 520 | 497 |
| CYB5R4       | -0.015893806 | 0.71766204  | 0.77662949 | 520 | 520 |
| LCE2B        | -0.015924852 | 0.717134161 | 0.77622488 | 520 | 303 |
| DAZ1         | -0.015993434 | 0.715968528 | 0.77508802 | 520 | 163 |
| PPP1R11      | -0.015997722 | 0.715895668 | 0.77505075 | 520 | 520 |
| MBD3L5       | -0.016007042 | 0.715737322 | 0.77492093 | 520 | 44  |
| RRS1         | -0.016007616 | 0.715727568 | 0.77492093 | 520 | 520 |
| FAM47E       | -0.016014515 | 0.715610356 | 0.77486668 | 520 | 486 |
| EIF3E        | -0.016041647 | 0.715149476 | 0.77445081 | 520 | 520 |
| ASB9         | -0.016070675 | 0.714656503 | 0.77395852 | 520 | 519 |

|           |              |             |            |     |     |
|-----------|--------------|-------------|------------|-----|-----|
| TRAF3IP2  | -0.016080471 | 0.714490169 | 0.77381995 | 520 | 520 |
| CA5BP     | -0.016241499 | 0.711757873 | 0.77119214 | 520 | 520 |
| DNAJB8    | -0.016278718 | 0.711126859 | 0.77063266 | 520 | 38  |
| OR4X2     | -0.016284097 | 0.71103568  | 0.77061489 | 520 | 18  |
| UGT2B15   | -0.016293485 | 0.710876568 | 0.77048566 | 520 | 362 |
| UNC5CL    | -0.0163552   | 0.709830823 | 0.76951767 | 520 | 518 |
| TMEM175   | -0.016401579 | 0.7090453   | 0.76895549 | 520 | 520 |
| DNM2      | -0.016413588 | 0.708841955 | 0.76877631 | 520 | 520 |
| SDCCAG1   | -0.016429021 | 0.708580673 | 0.76853427 | 520 | 520 |
| DBT       | -0.016466322 | 0.707949271 | 0.76797338 | 520 | 520 |
| PRAMEF10  | -0.01650465  | 0.707300702 | 0.7673111  | 520 | 47  |
| GLRA1     | -0.016509664 | 0.707215873 | 0.76726035 | 520 | 78  |
| CSAG1     | -0.016569484 | 0.706204097 | 0.7662039  | 520 | 402 |
| DEFB116   | -0.016572671 | 0.706150202 | 0.76618665 | 520 | 3   |
| DYNLT3    | -0.016580459 | 0.706018526 | 0.766085   | 520 | 520 |
| FLJ40504  | -0.01658293  | 0.705976753 | 0.7660809  | 520 | 152 |
| C14orf165 | -0.016631841 | 0.705149955 | 0.76522489 | 520 | 8   |
| GLUD1     | -0.016662807 | 0.704626694 | 0.76473936 | 520 | 520 |
| C12orf57  | -0.016670161 | 0.704502437 | 0.76472799 | 520 | 520 |
| RNASEK    | -0.016670429 | 0.704497915 | 0.76472799 | 520 | 520 |
| GPR83     | -0.016690941 | 0.704151393 | 0.76451156 | 520 | 485 |
| CN5H6.4   | -0.016702699 | 0.703952805 | 0.76437826 | 520 | 519 |
| IFI44L    | -0.01671119  | 0.703809392 | 0.7642637  | 520 | 520 |
| LRRC14    | -0.016717364 | 0.703705112 | 0.76423277 | 520 | 520 |
| BRD1      | -0.016718424 | 0.703687221 | 0.76423277 | 520 | 520 |
| SBK1      | -0.01673951  | 0.703331147 | 0.76399123 | 520 | 520 |
| FLJ43859  | -0.016750258 | 0.703149686 | 0.76383527 | 520 | 60  |
| MKI67     | -0.016756835 | 0.703038644 | 0.76375579 | 520 | 520 |
| SCAF1     | -0.016763075 | 0.702933301 | 0.76368249 | 520 | 520 |
| SIGLEC11  | -0.016768104 | 0.702848406 | 0.76363141 | 520 | 479 |
| TMEM51    | -0.016770496 | 0.702808039 | 0.76362869 | 520 | 520 |
| EGLN1     | -0.016821445 | 0.70194819  | 0.76298223 | 520 | 520 |
| BPIL3     | -0.016830758 | 0.701791068 | 0.76285257 | 520 | 62  |
| KYNU      | -0.016861797 | 0.701267462 | 0.7624067  | 520 | 520 |
| LOC150185 | -0.01686965  | 0.701135019 | 0.76234492 | 520 | 121 |
| ZNF311    | -0.016884606 | 0.700882785 | 0.76215286 | 520 | 514 |
| SNORA53   | -0.016911079 | 0.700436418 | 0.76170855 | 520 | 377 |
| OR4M1     | -0.016944284 | 0.699876672 | 0.76114089 | 520 | 30  |
| GPHN      | -0.016971623 | 0.699415942 | 0.76080396 | 520 | 520 |
| OR51B6    | -0.01701382  | 0.698705014 | 0.76015366 | 520 | 24  |
| QRFP      | -0.017035749 | 0.698335673 | 0.75979283 | 520 | 450 |
| C10orf120 | -0.017078249 | 0.697620056 | 0.75917809 | 520 | 52  |
| C15orf53  | -0.01708828  | 0.697451198 | 0.75907626 | 520 | 345 |
| TEX13A    | -0.017110554 | 0.697076293 | 0.75875014 | 520 | 33  |
| ST7OT1    | -0.017120015 | 0.696917064 | 0.75865873 | 520 | 520 |
| ORMDL3    | -0.01714456  | 0.696504045 | 0.758291   | 520 | 520 |

|           |              |             |            |     |     |
|-----------|--------------|-------------|------------|-----|-----|
| SLC35B1   | -0.017158936 | 0.696262181 | 0.75806861 | 520 | 520 |
| PAAF1     | -0.017171959 | 0.696043111 | 0.75788957 | 520 | 520 |
| OR2W5     | -0.017204834 | 0.695490212 | 0.75735079 | 520 | 9   |
| KIAA1737  | -0.017205578 | 0.695477701 | 0.75735079 | 520 | 520 |
| TRAF3IP3  | -0.017218336 | 0.695263167 | 0.75718534 | 520 | 520 |
| RNF212    | -0.017230726 | 0.69505486  | 0.75704025 | 520 | 506 |
| LOC400696 | -0.017236118 | 0.694964206 | 0.7569824  | 520 | 462 |
| S100A5    | -0.017237073 | 0.694948153 | 0.7569824  | 520 | 471 |
| ADAMTSL4  | -0.017262823 | 0.694515311 | 0.75665694 | 520 | 520 |
| TXNDC11   | -0.017302109 | 0.69385513  | 0.75598634 | 520 | 520 |
| PCLO      | -0.017319799 | 0.693557942 | 0.7558181  | 520 | 511 |
| UROS      | -0.0173255   | 0.693462174 | 0.75575458 | 520 | 520 |
| GOT1L1    | -0.017335155 | 0.6933      | 0.75561868 | 520 | 9   |
| SAP30     | -0.017348064 | 0.693083176 | 0.75550487 | 520 | 520 |
| PHOX2A    | -0.017381269 | 0.69252561  | 0.75497872 | 520 | 114 |
| NOV       | -0.017390579 | 0.692369306 | 0.75484913 | 520 | 520 |
| C1orf189  | -0.017397045 | 0.692260757 | 0.75481241 | 520 | 147 |
| ZNF488    | -0.017399423 | 0.692220822 | 0.75481241 | 520 | 520 |
| SLC18A3   | -0.017409604 | 0.692049929 | 0.75470496 | 520 | 239 |
| GPR15     | -0.017427081 | 0.691756603 | 0.75454193 | 520 | 466 |
| PISRT1    | -0.017469295 | 0.691048266 | 0.75397961 | 520 | 16  |
| ELAC2     | -0.017532643 | 0.689985823 | 0.75302415 | 520 | 520 |
| SDC4P     | -0.017543993 | 0.689795541 | 0.75285723 | 520 | 18  |
| IQCF2     | -0.017568798 | 0.689379724 | 0.75244412 | 520 | 49  |
| TBC1D15   | -0.017573306 | 0.689304177 | 0.75240239 | 520 | 520 |
| SNORA74B  | -0.017574752 | 0.68927993  | 0.75240239 | 520 | 125 |
| INTS12    | -0.017582384 | 0.689152028 | 0.75231777 | 520 | 520 |
| EIF2B2    | -0.017584385 | 0.689118484 | 0.75231777 | 520 | 520 |
| OR5M3     | -0.017600035 | 0.688856226 | 0.75207629 | 520 | 4   |
| SSB       | -0.017621013 | 0.688504745 | 0.75181467 | 520 | 520 |
| SLAMF7    | -0.01763699  | 0.688237101 | 0.75164453 | 520 | 520 |
| IQCF6     | -0.017648391 | 0.688046142 | 0.75147668 | 520 | 33  |
| OPA1      | -0.017654756 | 0.687939528 | 0.75140093 | 520 | 520 |
| LRRC69    | -0.017686518 | 0.68740765  | 0.75086066 | 520 | 489 |
| ALX3      | -0.017702668 | 0.687137268 | 0.75060599 | 520 | 518 |
| SLC19A2   | -0.017713362 | 0.686958261 | 0.75049176 | 520 | 520 |
| POU3F1    | -0.017761149 | 0.686158515 | 0.74973991 | 520 | 520 |
| OR51F1    | -0.017835318 | 0.684917951 | 0.74863711 | 520 | 14  |
| CD27      | -0.017847294 | 0.684717729 | 0.74852767 | 520 | 520 |
| RNF11     | -0.017882114 | 0.68413567  | 0.74793492 | 520 | 520 |
| SCARNA11  | -0.017895742 | 0.683907926 | 0.74776046 | 520 | 7   |
| FAM50B    | -0.017909547 | 0.683677234 | 0.74759586 | 520 | 520 |
| MDM1      | -0.017944121 | 0.683099643 | 0.7470453  | 520 | 520 |
| HIST1H1D  | -0.017968237 | 0.682696856 | 0.7467116  | 520 | 502 |
| CRYBA1    | -0.017975817 | 0.682570271 | 0.74662835 | 520 | 105 |
| HRG       | -0.018013596 | 0.68193953  | 0.74601935 | 520 | 367 |

|           |              |             |            |     |     |
|-----------|--------------|-------------|------------|-----|-----|
| SRRM1     | -0.018017779 | 0.681869702 | 0.74598343 | 520 | 520 |
| CYLC1     | -0.018092561 | 0.680621861 | 0.74490998 | 520 | 9   |
| DEFA4     | -0.018100814 | 0.68048419  | 0.74483135 | 520 | 59  |
| SLC1A1    | -0.018110502 | 0.680322608 | 0.74475786 | 520 | 520 |
| FAM13B    | -0.018131456 | 0.679973189 | 0.74450904 | 520 | 520 |
| OR7D2     | -0.01816105  | 0.679479789 | 0.7440955  | 520 | 397 |
| ERI3      | -0.018163964 | 0.679431209 | 0.74408271 | 520 | 520 |
| LRRIQ1    | -0.01820307  | 0.678779454 | 0.7434497  | 520 | 455 |
| OR2T8     | -0.018209736 | 0.678668386 | 0.74340881 | 520 | 154 |
| SLC25A36  | -0.01821032  | 0.678658641 | 0.74340881 | 520 | 520 |
| SNORA81   | -0.018266837 | 0.677717199 | 0.74260893 | 520 | 292 |
| ENTPD6    | -0.018313449 | 0.676941122 | 0.74191982 | 520 | 520 |
| CD6       | -0.018333207 | 0.676612258 | 0.74164001 | 520 | 520 |
| BHMT      | -0.018391175 | 0.675647767 | 0.74070361 | 520 | 402 |
| FOSL1     | -0.018407226 | 0.675380805 | 0.74053173 | 520 | 520 |
| NUTF2     | -0.018447466 | 0.6747117   | 0.73983831 | 520 | 520 |
| CLDN15    | -0.018448348 | 0.674697039 | 0.73983831 | 520 | 520 |
| EIF4H     | -0.018475473 | 0.674246147 | 0.73944846 | 520 | 520 |
| CP        | -0.018480675 | 0.674159684 | 0.73939385 | 520 | 515 |
| ARID3C    | -0.01848209  | 0.674136165 | 0.73939385 | 520 | 364 |
| EFCAB7    | -0.018489799 | 0.674008065 | 0.73930798 | 520 | 520 |
| WEE2      | -0.018519329 | 0.673517387 | 0.73885015 | 520 | 289 |
| GATA4     | -0.018544186 | 0.673104475 | 0.73855791 | 520 | 309 |
| ZNF238    | -0.018602436 | 0.672137247 | 0.73765718 | 520 | 520 |
| EPB42     | -0.018652742 | 0.671302358 | 0.73686123 | 520 | 94  |
| CITED1    | -0.018679451 | 0.670859258 | 0.73641494 | 520 | 509 |
| GSTM2     | -0.018680861 | 0.670835856 | 0.73641494 | 520 | 520 |
| C9orf50   | -0.018695653 | 0.670590509 | 0.73632036 | 520 | 347 |
| C14orf105 | -0.018708793 | 0.670372604 | 0.73620136 | 520 | 97  |
| SPEF1     | -0.018758554 | 0.669547604 | 0.73540304 | 520 | 463 |
| SUMO3     | -0.018805558 | 0.668768669 | 0.73467309 | 520 | 520 |
| CASP2     | -0.01882122  | 0.668509198 | 0.73459507 | 520 | 520 |
| DMRTB1    | -0.018830161 | 0.668361098 | 0.73451238 | 520 | 62  |
| ZCCHC13   | -0.018903924 | 0.667139757 | 0.73340999 | 520 | 16  |
| TMEM126B  | -0.018929947 | 0.666709078 | 0.7330964  | 520 | 520 |
| C3orf45   | -0.018952761 | 0.666331603 | 0.73280122 | 520 | 397 |
| RNF19B    | -0.018953315 | 0.666322428 | 0.73280122 | 520 | 520 |
| ANXA3     | -0.018975323 | 0.665958366 | 0.73247065 | 520 | 520 |
| ANKRD12   | -0.018996726 | 0.665604395 | 0.7321612  | 520 | 520 |
| MICALL1   | -0.019030427 | 0.665047178 | 0.73174786 | 520 | 520 |
| GGT1      | -0.019042188 | 0.664852768 | 0.73157387 | 520 | 520 |
| OCIAD1    | -0.019075247 | 0.664306409 | 0.73101258 | 520 | 520 |
| SNORA56   | -0.01909593  | 0.663964677 | 0.7306764  | 520 | 17  |
| MBD3L2    | -0.01910111  | 0.663879099 | 0.7306221  | 520 | 30  |
| SHISA7    | -0.019103303 | 0.663842876 | 0.7306221  | 520 | 446 |
| NARG2     | -0.019115589 | 0.663639921 | 0.73047848 | 520 | 520 |

|           |              |             |            |     |     |
|-----------|--------------|-------------|------------|-----|-----|
| C14orf28  | -0.019124252 | 0.663496841 | 0.73040074 | 520 | 520 |
| OR6C74    | -0.019184376 | 0.662504119 | 0.72946721 | 520 | 4   |
| C10orf84  | -0.019273811 | 0.66102853  | 0.72796173 | 520 | 520 |
| PCBP1     | -0.019286181 | 0.660824544 | 0.72777684 | 520 | 520 |
| C20orf144 | -0.019319295 | 0.660278595 | 0.72721529 | 520 | 160 |
| LOC650293 | -0.01932995  | 0.660102968 | 0.72706157 | 520 | 31  |
| RNU6ATAC  | -0.019342425 | 0.65989736  | 0.72687482 | 520 | 25  |
| ZNF321    | -0.019345266 | 0.659850553 | 0.72686296 | 520 | 517 |
| C17orf102 | -0.019374224 | 0.659373396 | 0.72641672 | 520 | 57  |
| SP5       | -0.019439118 | 0.658304605 | 0.72547708 | 520 | 494 |
| ARMC3     | -0.019449813 | 0.658128521 | 0.72532899 | 520 | 211 |
| C7orf66   | -0.019456835 | 0.65801293  | 0.72527456 | 520 | 19  |
| LOC389705 | -0.019486501 | 0.657524648 | 0.7248156  | 520 | 515 |
| CYP11B1   | -0.019488418 | 0.657493111 | 0.7248156  | 520 | 79  |
| HBS1L     | -0.019488481 | 0.657492073 | 0.7248156  | 520 | 520 |
| CD200R1L  | -0.019527336 | 0.656852788 | 0.72419376 | 520 | 136 |
| CCDC135   | -0.01955454  | 0.656405348 | 0.72377959 | 520 | 282 |
| C14orf23  | -0.019559512 | 0.656323575 | 0.723729   | 520 | 131 |
| ZSCAN5B   | -0.019563661 | 0.656255348 | 0.72369335 | 520 | 497 |
| C17orf74  | -0.019578302 | 0.656014616 | 0.72346744 | 520 | 165 |
| PRR3      | -0.019662641 | 0.654628564 | 0.72225489 | 520 | 520 |
| KIF4A     | -0.019674569 | 0.654432623 | 0.72211773 | 520 | 520 |
| NOLC1     | -0.019687055 | 0.654227556 | 0.72193096 | 520 | 520 |
| TSKS      | -0.01971897  | 0.653703496 | 0.72139215 | 520 | 496 |
| C1QTNF9B  | -0.019719173 | 0.653700165 | 0.72139215 | 520 | 401 |
| RAB19     | -0.019724364 | 0.653614931 | 0.72137337 | 520 | 441 |
| OR2J2     | -0.019729535 | 0.653530043 | 0.72131916 | 520 | 16  |
| ZNF204P   | -0.019743745 | 0.653296786 | 0.72110118 | 520 | 520 |
| LGALS8    | -0.019750896 | 0.653179411 | 0.72101109 | 520 | 520 |
| RPS6KA4   | -0.019756588 | 0.653086003 | 0.72094745 | 520 | 520 |
| MOSPD3    | -0.019769516 | 0.652873845 | 0.72079217 | 520 | 520 |
| KRT28     | -0.019797193 | 0.652419737 | 0.72033688 | 520 | 33  |
| PAPD7     | -0.019810204 | 0.65220632  | 0.72021294 | 520 | 520 |
| VCX2      | -0.019833709 | 0.651820816 | 0.71983185 | 520 | 32  |
| LY6G5C    | -0.019849109 | 0.65156829  | 0.71962661 | 520 | 520 |
| PPID      | -0.019851701 | 0.651525803 | 0.71962661 | 520 | 520 |
| USP54     | -0.019877524 | 0.65110246  | 0.71923031 | 520 | 520 |
| FAM175B   | -0.019887266 | 0.650942797 | 0.71913273 | 520 | 520 |
| MYD88     | -0.019905113 | 0.650650314 | 0.71884899 | 520 | 520 |
| SSRP1     | -0.019907284 | 0.650614735 | 0.71884899 | 520 | 520 |
| FOXI1     | -0.019910222 | 0.650566594 | 0.71883527 | 520 | 263 |
| DHX15     | -0.019913217 | 0.650517511 | 0.71882042 | 520 | 520 |
| EXOC4     | -0.019936324 | 0.650138941 | 0.71852023 | 520 | 520 |
| KRTAP26-1 | -0.01997208  | 0.649553313 | 0.71803043 | 520 | 47  |
| IFITM1    | -0.020016675 | 0.648823221 | 0.71734134 | 520 | 520 |
| LOC254312 | -0.02003147  | 0.648581077 | 0.71711295 | 520 | 3   |

|              |              |             |            |     |     |
|--------------|--------------|-------------|------------|-----|-----|
| BMP15        | -0.02003231  | 0.648567341 | 0.71711295 | 520 | 40  |
| HBBP1        | -0.020045979 | 0.64834365  | 0.71701897 | 520 | 81  |
| C1orf223     | -0.020051832 | 0.648247879 | 0.71698043 | 520 | 220 |
| ZSWIM3       | -0.020076541 | 0.647843646 | 0.71661195 | 520 | 520 |
| CCDC21       | -0.020080599 | 0.647777267 | 0.71657784 | 520 | 520 |
| TAS1R2       | -0.020084568 | 0.647712356 | 0.71654534 | 520 | 136 |
| LOC374491    | -0.020103585 | 0.647401337 | 0.71624057 | 520 | 328 |
| PRNT         | -0.02011929  | 0.64714453  | 0.71607432 | 520 | 31  |
| FAM40A       | -0.020135234 | 0.646883854 | 0.7158761  | 520 | 520 |
| SFTPC        | -0.020137466 | 0.646847375 | 0.7158761  | 520 | 255 |
| LOC100128554 | -0.020176933 | 0.646202311 | 0.71526725 | 520 | 57  |
| UBXN2A       | -0.020196544 | 0.645881901 | 0.71499109 | 520 | 520 |
| OSCP1        | -0.020228878 | 0.645353727 | 0.71456332 | 520 | 520 |
| YME1L1       | -0.02023438  | 0.645263868 | 0.71450305 | 520 | 520 |
| CDSN         | -0.02025613  | 0.644908715 | 0.71414901 | 520 | 520 |
| FAM86B1      | -0.020313296 | 0.643975635 | 0.71323326 | 520 | 520 |
| C7orf51      | -0.020320508 | 0.643857965 | 0.7131421  | 520 | 514 |
| CRISP2       | -0.020338264 | 0.643568275 | 0.71289685 | 520 | 130 |
| ARPC2        | -0.020355883 | 0.643280882 | 0.71265951 | 520 | 520 |
| PRKY         | -0.020362433 | 0.643174049 | 0.7125803  | 520 | 498 |
| FEM1B        | -0.020380195 | 0.64288441  | 0.71233769 | 520 | 520 |
| SLC5A2       | -0.020395801 | 0.642629951 | 0.71209487 | 520 | 226 |
| PRAMEF20     | -0.020427137 | 0.642119161 | 0.71160708 | 520 | 87  |
| IPO13        | -0.02045063  | 0.641736323 | 0.71130009 | 520 | 520 |
| FRG2         | -0.020464236 | 0.641514635 | 0.71113255 | 520 | 136 |
| TMEM206      | -0.020473852 | 0.641357992 | 0.710998   | 520 | 520 |
| INS          | -0.020508862 | 0.640787783 | 0.71048306 | 520 | 21  |
| H2BFWT       | -0.020517263 | 0.640650989 | 0.71037045 | 520 | 254 |
| CBX7         | -0.020528279 | 0.640471632 | 0.71028764 | 520 | 520 |
| TEX19        | -0.020541263 | 0.640260257 | 0.71013244 | 520 | 437 |
| EHBP1L1      | -0.020562957 | 0.639907163 | 0.7098189  | 520 | 520 |
| KRT8         | -0.02056375  | 0.639894266 | 0.7098189  | 520 | 520 |
| C12orf61     | -0.020583372 | 0.639574954 | 0.70960655 | 520 | 520 |
| DLX3         | -0.020594243 | 0.63939809  | 0.70944935 | 520 | 518 |
| KCNH6        | -0.020595089 | 0.63938433  | 0.70944935 | 520 | 169 |
| OR52I1       | -0.020612367 | 0.639103257 | 0.7092393  | 520 | 38  |
| PRAMEF14     | -0.020645546 | 0.638563667 | 0.7087185  | 520 | 35  |
| C2orf78      | -0.020659305 | 0.63833996  | 0.70850922 | 520 | 113 |
| SLC2A12      | -0.020687717 | 0.637878099 | 0.70803556 | 520 | 520 |
| WDR25        | -0.020695887 | 0.637745328 | 0.70792716 | 520 | 520 |
| TMOD3        | -0.020704544 | 0.637604648 | 0.70780996 | 520 | 520 |
| MIS12        | -0.020726601 | 0.637246265 | 0.70745106 | 520 | 520 |
| LOC643486    | -0.020738428 | 0.637054127 | 0.7072767  | 520 | 31  |
| CCDC105      | -0.020754408 | 0.636794571 | 0.70706639 | 520 | 48  |
| BRWD1        | -0.020763033 | 0.636654496 | 0.70694979 | 520 | 520 |
| HAO2         | -0.020799279 | 0.636065979 | 0.70637409 | 520 | 290 |

|           |              |             |            |     |     |
|-----------|--------------|-------------|------------|-----|-----|
| FAM177A1  | -0.020838517 | 0.635429144 | 0.70571346 | 520 | 520 |
| BTG2      | -0.020842326 | 0.635367336 | 0.70571346 | 520 | 520 |
| OR4K14    | -0.020862021 | 0.635047798 | 0.70539877 | 520 | 21  |
| ZNF580    | -0.020863686 | 0.635020798 | 0.70539877 | 520 | 520 |
| SGOL2     | -0.020898182 | 0.634461301 | 0.70490262 | 520 | 520 |
| ZNF707    | -0.020932849 | 0.633899239 | 0.70445211 | 520 | 520 |
| XRCC4     | -0.021005539 | 0.632721382 | 0.7033183  | 520 | 520 |
| C6orf134  | -0.021056631 | 0.63189405  | 0.70251484 | 520 | 520 |
| BTRC      | -0.021064402 | 0.631768261 | 0.70241372 | 520 | 520 |
| LGALS2    | -0.021071248 | 0.631657445 | 0.70232924 | 520 | 512 |
| NCBP1     | -0.02117838  | 0.629924429 | 0.70059549 | 520 | 520 |
| LOC285501 | -0.021185277 | 0.629812931 | 0.70051012 | 520 | 217 |
| CDIPT     | -0.021195321 | 0.629650583 | 0.70036818 | 520 | 520 |
| SPINT3    | -0.021266396 | 0.628502176 | 0.69932225 | 520 | 3   |
| TMBIM6    | -0.021272655 | 0.628401081 | 0.69924835 | 520 | 520 |
| SNORA11D  | -0.021294888 | 0.628042058 | 0.69892599 | 520 | 6   |
| LCE2A     | -0.021304925 | 0.627880008 | 0.69878422 | 520 | 317 |
| OR52W1    | -0.02132525  | 0.627551914 | 0.69845763 | 520 | 46  |
| SNORA3    | -0.021337704 | 0.627350899 | 0.69827244 | 520 | 36  |
| TTY5      | -0.02134384  | 0.627251881 | 0.69820077 | 520 | 13  |
| TRERF1    | -0.021348151 | 0.627182302 | 0.69816186 | 520 | 520 |
| CYP20A1   | -0.021374743 | 0.626753268 | 0.69783837 | 520 | 520 |
| ORAOV1    | -0.021374865 | 0.62675129  | 0.69783837 | 520 | 520 |
| MMD2      | -0.021375389 | 0.626742845 | 0.69783837 | 520 | 59  |
| HIST1H1E  | -0.02141135  | 0.626162829 | 0.69733499 | 520 | 519 |
| MAT2B     | -0.021425943 | 0.625927526 | 0.69711144 | 520 | 520 |
| GOLGA8DP  | -0.021439686 | 0.625705968 | 0.69690318 | 520 | 229 |
| APOA1     | -0.021468237 | 0.625245779 | 0.69646757 | 520 | 455 |
| OR2A9P    | -0.021512767 | 0.62452835  | 0.69582217 | 520 | 520 |
| FAM199X   | -0.021513741 | 0.624512649 | 0.69582217 | 520 | 520 |
| OR8J3     | -0.021522962 | 0.624364135 | 0.69575454 | 520 | 7   |
| POLR3H    | -0.021568392 | 0.623632646 | 0.69497782 | 520 | 520 |
| SAPS1     | -0.021575125 | 0.623524255 | 0.69489543 | 520 | 520 |
| PROL1     | -0.021580196 | 0.623442639 | 0.69485655 | 520 | 39  |
| IGSF5     | -0.021586629 | 0.623339106 | 0.6948043  | 520 | 259 |
| SPDYE5    | -0.02160355  | 0.62306679  | 0.69453915 | 520 | 502 |
| C5orf25   | -0.021606948 | 0.623012113 | 0.6945166  | 520 | 520 |
| SNORA71D  | -0.021612838 | 0.622917345 | 0.69444935 | 520 | 19  |
| C20orf152 | -0.021625183 | 0.622718743 | 0.69426632 | 520 | 398 |
| IRF6      | -0.021660466 | 0.622151238 | 0.69382543 | 520 | 520 |
| PRG2      | -0.021660529 | 0.622150225 | 0.69382543 | 520 | 518 |
| HNRNPCL1  | -0.021667387 | 0.622039947 | 0.69377806 | 520 | 23  |
| C14orf177 | -0.021684203 | 0.621769581 | 0.69351487 | 520 | 33  |
| XPO1      | -0.021703072 | 0.62146626  | 0.69329664 | 520 | 520 |
| ZSCAN5A   | -0.021719596 | 0.62120068  | 0.69307201 | 520 | 520 |
| CNOT4     | -0.021744154 | 0.620806089 | 0.6926701  | 520 | 520 |

|           |              |             |            |     |     |
|-----------|--------------|-------------|------------|-----|-----|
| EGR4      | -0.021751197 | 0.620692929 | 0.69262049 | 520 | 488 |
| HOMER2    | -0.021754244 | 0.620643994 | 0.69260421 | 520 | 520 |
| GSG2      | -0.021757682 | 0.620588759 | 0.6925809  | 520 | 520 |
| OR6C68    | -0.021783169 | 0.620179402 | 0.692239   | 520 | 5   |
| ATG2A     | -0.021815504 | 0.619660244 | 0.6917361  | 520 | 520 |
| FANCM     | -0.021816538 | 0.619643634 | 0.6917361  | 520 | 520 |
| DMXL1     | -0.021856645 | 0.618999956 | 0.69119034 | 520 | 520 |
| TMUB2     | -0.021882673 | 0.618582386 | 0.69080058 | 520 | 520 |
| HOXA3     | -0.021915539 | 0.618055276 | 0.69032663 | 520 | 518 |
| VWA5B2    | -0.021915644 | 0.618053589 | 0.69032663 | 520 | 471 |
| HIST3H2BB | -0.021922708 | 0.617940333 | 0.69027471 | 520 | 479 |
| HDAC5     | -0.021950319 | 0.6174977   | 0.68989493 | 520 | 520 |
| SLC25A27  | -0.021958487 | 0.617366779 | 0.68978687 | 520 | 519 |
| MCM3APAS  | -0.022058144 | 0.615770469 | 0.68815584 | 520 | 519 |
| TCIRG1    | -0.022063059 | 0.615691784 | 0.68812735 | 520 | 520 |
| MC2R      | -0.02207369  | 0.615521606 | 0.68799211 | 520 | 52  |
| OR5D18    | -0.022075738 | 0.615488833 | 0.68799211 | 520 | 13  |
| FAM184A   | -0.02208032  | 0.6154155   | 0.68794978 | 520 | 510 |
| FNDC7     | -0.022082029 | 0.615388143 | 0.68794978 | 520 | 137 |
| PHF13     | -0.022086195 | 0.615321478 | 0.68792095 | 520 | 520 |
| C1orf100  | -0.022107233 | 0.614984816 | 0.68758269 | 520 | 25  |
| MTERFD2   | -0.022108341 | 0.614967099 | 0.68758269 | 520 | 520 |
| VPS13D    | -0.022118855 | 0.614798884 | 0.68748917 | 520 | 520 |
| IFLTD1    | -0.022120149 | 0.614778179 | 0.68748917 | 520 | 113 |
| UGP2      | -0.022122448 | 0.614741396 | 0.68748917 | 520 | 520 |
| FXC1      | -0.022123678 | 0.61472173  | 0.68748917 | 520 | 520 |
| FGB       | -0.02213157  | 0.614595486 | 0.68741421 | 520 | 200 |
| PPP1R15A  | -0.022188612 | 0.613683366 | 0.68650826 | 520 | 520 |
| LCE6A     | -0.02219136  | 0.613639441 | 0.68650826 | 520 | 255 |
| MEGF11    | -0.02219326  | 0.613609061 | 0.68650826 | 520 | 462 |
| C1QL2     | -0.022218005 | 0.613213595 | 0.68617308 | 520 | 160 |
| RNASEH2C  | -0.022222303 | 0.613144909 | 0.6861343  | 520 | 520 |
| TUBA3D    | -0.022268505 | 0.612406841 | 0.68542249 | 520 | 397 |
| CASP6     | -0.022277643 | 0.612260909 | 0.68529719 | 520 | 520 |
| SNTG1     | -0.02232992  | 0.611426369 | 0.68456785 | 520 | 16  |
| C9orf72   | -0.022330391 | 0.611418848 | 0.68456785 | 520 | 520 |
| GIF       | -0.022334611 | 0.611351501 | 0.68456785 | 520 | 43  |
| TEX13B    | -0.022339329 | 0.611276204 | 0.68456785 | 520 | 159 |
| C12orf35  | -0.022391534 | 0.610443408 | 0.68379428 | 520 | 520 |
| C19orf20  | -0.022392922 | 0.610421263 | 0.68379428 | 520 | 520 |
| OR5M10    | -0.022405278 | 0.610224223 | 0.6836627  | 520 | 17  |
| CIR1      | -0.022456576 | 0.609406508 | 0.6828604  | 520 | 520 |
| ACTRT1    | -0.022465633 | 0.609262194 | 0.68273663 | 520 | 77  |
| OR6Q1     | -0.022466102 | 0.60925472  | 0.68273663 | 520 | 21  |
| C6orf126  | -0.022471524 | 0.609168322 | 0.68273519 | 520 | 105 |
| PRSS38    | -0.022492264 | 0.608837904 | 0.68241287 | 520 | 49  |



|              |              |             |            |     |     |
|--------------|--------------|-------------|------------|-----|-----|
| ATP6V1H      | -0.022543878 | 0.608015984 | 0.68171899 | 520 | 520 |
| CNR2         | -0.022559546 | 0.607766579 | 0.68147725 | 520 | 411 |
| PNLIP        | -0.022561952 | 0.607728276 | 0.68147219 | 520 | 30  |
| LOC100303728 | -0.022614022 | 0.60689976  | 0.68077029 | 520 | 517 |
| PPM1D        | -0.022614102 | 0.606898488 | 0.68077029 | 520 | 520 |
| CELSR3       | -0.022643749 | 0.606426992 | 0.68042924 | 520 | 520 |
| OR5W2        | -0.022735005 | 0.604976694 | 0.6789153  | 520 | 9   |
| CHD5         | -0.022778369 | 0.604288052 | 0.67827827 | 520 | 466 |
| PRSS41       | -0.022807471 | 0.603826108 | 0.67781271 | 520 | 130 |
| ABCC6P1      | -0.022832101 | 0.603435283 | 0.67748247 | 520 | 221 |
| PRAMEF8      | -0.022836077 | 0.603372195 | 0.67745403 | 520 | 127 |
| LOC283314    | -0.02284961  | 0.603157502 | 0.6772884  | 520 | 520 |
| IDH1         | -0.022854754 | 0.603075904 | 0.67723449 | 520 | 520 |
| NANOS2       | -0.022884853 | 0.602598569 | 0.67681154 | 520 | 124 |
| TMEM53       | -0.022886086 | 0.602579023 | 0.67681154 | 520 | 520 |
| FZR1         | -0.022892034 | 0.602484718 | 0.67675906 | 520 | 520 |
| COL4A3BP     | -0.022895799 | 0.602425021 | 0.6767297  | 520 | 520 |
| TTLL4        | -0.022896181 | 0.602418961 | 0.6767297  | 520 | 520 |
| CLDN20       | -0.022899418 | 0.602367638 | 0.6767297  | 520 | 426 |
| MTHFD1       | -0.022908888 | 0.602217518 | 0.67660969 | 520 | 520 |
| MLLT1        | -0.022920096 | 0.602039872 | 0.67644779 | 520 | 520 |
| FAM131A      | -0.022923423 | 0.601987142 | 0.67643916 | 520 | 520 |
| LOC100128023 | -0.022934358 | 0.601813838 | 0.67634457 | 520 | 104 |
| PDE6C        | -0.022945577 | 0.601636067 | 0.67618247 | 520 | 85  |
| FLJ43950     | -0.022945884 | 0.601631201 | 0.67618247 | 520 | 92  |
| OR6N2        | -0.02295199  | 0.601534459 | 0.67614364 | 520 | 11  |
| ALPI         | -0.022976098 | 0.601152556 | 0.67582739 | 520 | 44  |
| BUB1         | -0.022977225 | 0.601134705 | 0.67582739 | 520 | 520 |
| LYPD6        | -0.022993503 | 0.600876901 | 0.6756305  | 520 | 509 |
| B3GALT5      | -0.022997111 | 0.600819771 | 0.67560394 | 520 | 397 |
| CHTF8        | -0.023032698 | 0.600256357 | 0.67504569 | 520 | 520 |
| HSD17B3      | -0.023041859 | 0.600111372 | 0.67492028 | 520 | 478 |
| DIMT1L       | -0.023046231 | 0.600042172 | 0.6748801  | 520 | 520 |
| MLKL         | -0.023093734 | 0.599290603 | 0.67407239 | 520 | 520 |
| CWC22        | -0.023093775 | 0.599289968 | 0.67407239 | 520 | 520 |
| BRDT         | -0.023126049 | 0.598779579 | 0.67361032 | 520 | 195 |
| H2BFM        | -0.023130652 | 0.598706813 | 0.67360363 | 520 | 194 |
| CLDN2        | -0.023135872 | 0.598624287 | 0.67358594 | 520 | 506 |
| KRTAP6-3     | -0.023140057 | 0.598558133 | 0.67356375 | 520 | 22  |
| DUSP9        | -0.023142015 | 0.598527167 | 0.67356375 | 520 | 520 |
| C6orf106     | -0.023142568 | 0.598518433 | 0.67356375 | 520 | 520 |
| C21orf34     | -0.023142943 | 0.598512499 | 0.67356375 | 520 | 500 |
| XIST         | -0.023167637 | 0.598122206 | 0.67328399 | 520 | 415 |
| UBOX5        | -0.023210913 | 0.597438496 | 0.67255191 | 520 | 520 |
| DEFA1B       | -0.023226654 | 0.597189901 | 0.67234713 | 520 | 345 |
| OR52H1       | -0.02332987  | 0.595560932 | 0.67062549 | 520 | 21  |

|           |              |             |            |     |     |
|-----------|--------------|-------------|------------|-----|-----|
| RHEB      | -0.023339562 | 0.59540808  | 0.67052826 | 520 | 520 |
| GAB4      | -0.023379294 | 0.59478164  | 0.66989761 | 520 | 73  |
| EIF2A     | -0.023391465 | 0.5945898   | 0.66971896 | 520 | 520 |
| ACTL6A    | -0.023409319 | 0.594308442 | 0.66947684 | 520 | 520 |
| ZNF518A   | -0.023432101 | 0.593949528 | 0.66915957 | 520 | 520 |
| IL1A      | -0.023498232 | 0.592908188 | 0.66812343 | 520 | 520 |
| ProSAPiP1 | -0.02352416  | 0.592500148 | 0.66773826 | 520 | 520 |
| PPAPDC1B  | -0.023558828 | 0.591954744 | 0.66719818 | 520 | 520 |
| SCAP      | -0.023609535 | 0.591157444 | 0.66641129 | 520 | 520 |
| HSPA1A    | -0.023716736 | 0.589473468 | 0.66469875 | 520 | 520 |
| TMEM225   | -0.023747584 | 0.588989306 | 0.66422709 | 520 | 5   |
| MED28     | -0.023751098 | 0.588934156 | 0.66420204 | 520 | 520 |
| MSTO2P    | -0.02377791  | 0.588513506 | 0.66383902 | 520 | 520 |
| SELT      | -0.02379333  | 0.588271638 | 0.66360332 | 520 | 520 |
| KDM1A     | -0.023842959 | 0.587493518 | 0.66279971 | 520 | 520 |
| LOC126536 | -0.023887318 | 0.586798423 | 0.66216371 | 520 | 106 |
| SLC6A19   | -0.023924823 | 0.586211038 | 0.66159597 | 520 | 152 |
| TTY23     | -0.023932887 | 0.586084777 | 0.66150649 | 520 | 4   |
| CAMLG     | -0.023938468 | 0.5859974   | 0.66144489 | 520 | 520 |
| DDX53     | -0.023949137 | 0.585830375 | 0.6613304  | 520 | 85  |
| CPSF4L    | -0.023972028 | 0.585472108 | 0.66099998 | 520 | 199 |
| OSTBETA   | -0.023973224 | 0.585453393 | 0.66099998 | 520 | 208 |
| FAM157A   | -0.02398034  | 0.585342031 | 0.66092713 | 520 | 513 |
| STAT5A    | -0.02402865  | 0.584586331 | 0.66018475 | 520 | 520 |
| HIST1H3H  | -0.024036341 | 0.584466066 | 0.66008591 | 520 | 518 |
| GPR6      | -0.024056727 | 0.584147344 | 0.6597629  | 520 | 20  |
| FAM181A   | -0.024060172 | 0.584093495 | 0.65975143 | 520 | 400 |
| SLC39A5   | -0.024060263 | 0.584092063 | 0.65975143 | 520 | 354 |
| TRIB1     | -0.024132004 | 0.582971122 | 0.65876652 | 520 | 520 |
| C6orf168  | -0.024141581 | 0.582821552 | 0.65863441 | 520 | 519 |
| OR52M1    | -0.024151682 | 0.582663823 | 0.65849307 | 520 | 13  |
| CLEC9A    | -0.02417274  | 0.582335064 | 0.65815841 | 520 | 466 |
| CFHR5     | -0.024187326 | 0.582107394 | 0.65797486 | 520 | 37  |
| SPIB      | -0.024198129 | 0.581938802 | 0.65782117 | 520 | 515 |
| CHRM2     | -0.024199131 | 0.581923159 | 0.65782117 | 520 | 72  |
| GNG3      | -0.024223881 | 0.581537009 | 0.65747756 | 520 | 488 |
| HOXD11    | -0.024224572 | 0.581526227 | 0.65747756 | 520 | 516 |
| CDK11A    | -0.024233282 | 0.581390361 | 0.65738548 | 520 | 520 |
| MARS      | -0.024242508 | 0.581246456 | 0.6572751  | 520 | 520 |
| FBXO43    | -0.024281579 | 0.580637234 | 0.6566812  | 520 | 517 |
| FUT7      | -0.024290688 | 0.580495246 | 0.65655745 | 520 | 519 |
| ENOPH1    | -0.024297701 | 0.580385937 | 0.65647064 | 520 | 520 |
| GPR52     | -0.024307955 | 0.580226129 | 0.65632669 | 520 | 180 |
| AP4S1     | -0.024311156 | 0.580176259 | 0.6563071  | 520 | 520 |
| BHLHE23   | -0.024320783 | 0.58002625  | 0.65621104 | 520 | 10  |
| UBQLN1    | -0.024327347 | 0.57992397  | 0.65613214 | 520 | 520 |

|              |              |             |            |     |     |
|--------------|--------------|-------------|------------|-----|-----|
| ZNF283       | -0.024355242 | 0.579489451 | 0.65567731 | 520 | 520 |
| TEAD3        | -0.024361789 | 0.579387483 | 0.65559872 | 520 | 520 |
| OR1E2        | -0.024369147 | 0.579272909 | 0.65554265 | 520 | 29  |
| BRD9         | -0.024371519 | 0.579235964 | 0.65553763 | 520 | 520 |
| HGS          | -0.024372954 | 0.579213618 | 0.65553763 | 520 | 520 |
| SHISA5       | -0.024376406 | 0.57915988  | 0.65552511 | 520 | 520 |
| OR13A1       | -0.024391687 | 0.578921972 | 0.65529262 | 520 | 389 |
| OR2B3        | -0.024435745 | 0.578236294 | 0.65462673 | 520 | 15  |
| LMNB2        | -0.024457828 | 0.577892768 | 0.65431129 | 520 | 520 |
| VSX2         | -0.024459792 | 0.577862215 | 0.65431129 | 520 | 232 |
| EMILIN3      | -0.024477085 | 0.577593274 | 0.65414096 | 520 | 518 |
| OR2AE1       | -0.024487176 | 0.577436369 | 0.65405162 | 520 | 156 |
| WDR46        | -0.024509969 | 0.577082019 | 0.65382797 | 520 | 520 |
| RSPH4A       | -0.024527519 | 0.576809256 | 0.65363504 | 520 | 503 |
| C20orf70     | -0.024530939 | 0.576756106 | 0.65361154 | 520 | 82  |
| TRIM60       | -0.024533172 | 0.576721401 | 0.65360894 | 520 | 13  |
| BRS3         | -0.024543975 | 0.576553533 | 0.65356804 | 520 | 109 |
| ZBTB45       | -0.024546645 | 0.576512056 | 0.65356804 | 520 | 520 |
| LOC100129935 | -0.02455071  | 0.5764489   | 0.65356804 | 520 | 19  |
| NEUROD4      | -0.024573237 | 0.576098979 | 0.65323398 | 520 | 43  |
| ZBTB32       | -0.024579558 | 0.576000797 | 0.65315938 | 520 | 519 |
| OR5B2        | -0.02460234  | 0.575647042 | 0.65279495 | 520 | 27  |
| IFNA4        | -0.024605631 | 0.575595942 | 0.65277371 | 520 | 13  |
| MAP2K3       | -0.024625649 | 0.575285195 | 0.65260482 | 520 | 520 |
| CYB5RL       | -0.024646096 | 0.574967882 | 0.65235496 | 520 | 520 |
| RASGEF1C     | -0.02464716  | 0.574951376 | 0.65235496 | 520 | 462 |
| VAMP3        | -0.024691633 | 0.574261484 | 0.65166349 | 520 | 520 |
| TYW3         | -0.024758255 | 0.573228735 | 0.65071127 | 520 | 520 |
| DNAH2        | -0.024761836 | 0.573173249 | 0.65068491 | 520 | 510 |
| NXF3         | -0.024777418 | 0.572931827 | 0.65048409 | 520 | 440 |
| OR11H6       | -0.024805391 | 0.572498578 | 0.6500654  | 520 | 91  |
| MMP26        | -0.024811169 | 0.572409105 | 0.6500004  | 520 | 24  |
| TNS4         | -0.024814259 | 0.572361264 | 0.64998268 | 520 | 520 |
| TAS2R43      | -0.024837271 | 0.572004993 | 0.64965127 | 520 | 167 |
| MAP4K1       | -0.024880897 | 0.571329874 | 0.64892106 | 520 | 520 |
| ABCB8        | -0.024917012 | 0.570771291 | 0.64832314 | 520 | 520 |
| MBIP         | -0.024936179 | 0.570474928 | 0.64805952 | 520 | 520 |
| HOXD4        | -0.0249758   | 0.56986256  | 0.64754628 | 520 | 515 |
| CXorf1       | -0.025024487 | 0.569110489 | 0.64680103 | 520 | 66  |
| C21orf49     | -0.025034548 | 0.568955141 | 0.64666092 | 520 | 477 |
| CELA2A       | -0.025062888 | 0.568517654 | 0.64620011 | 520 | 45  |
| TPT1         | -0.025124802 | 0.567562421 | 0.64529623 | 520 | 520 |
| BSG          | -0.025189793 | 0.566560561 | 0.64433881 | 520 | 520 |
| PON3         | -0.025215271 | 0.566168036 | 0.64392872 | 520 | 489 |
| NCRNA00230B  | -0.02524497  | 0.565710634 | 0.64344479 | 520 | 256 |
| CCDC97       | -0.025248586 | 0.565654963 | 0.64341776 | 520 | 520 |

|           |              |             |            |     |     |
|-----------|--------------|-------------|------------|-----|-----|
| POLRMT    | -0.025250209 | 0.565629962 | 0.64341776 | 520 | 520 |
| SNORA49   | -0.025259431 | 0.565487987 | 0.64330041 | 520 | 20  |
| SCGB1D2   | -0.025266791 | 0.565374683 | 0.6432078  | 520 | 135 |
| IFNA6     | -0.025279915 | 0.565172681 | 0.64301427 | 520 | 12  |
| TSG1      | -0.025280687 | 0.565160793 | 0.64301427 | 520 | 114 |
| CDK5      | -0.025301928 | 0.564833931 | 0.64270139 | 520 | 520 |
| OR56A1    | -0.025321082 | 0.564539255 | 0.64240234 | 520 | 27  |
| PARP10    | -0.025336571 | 0.564301009 | 0.64223997 | 520 | 520 |
| MAK       | -0.025341505 | 0.564225135 | 0.64218986 | 520 | 507 |
| WNT1      | -0.025346622 | 0.564146448 | 0.64213655 | 520 | 388 |
| KIF20B    | -0.02535005  | 0.564093724 | 0.64211278 | 520 | 520 |
| TMEM5     | -0.025373489 | 0.563733362 | 0.64173881 | 520 | 520 |
| CYP11B2   | -0.02537576  | 0.563698451 | 0.6417353  | 520 | 9   |
| SDC4      | -0.025376094 | 0.563693314 | 0.6417353  | 520 | 520 |
| PTH       | -0.025381372 | 0.563612197 | 0.64170956 | 520 | 39  |
| PDCD1     | -0.02539197  | 0.563449302 | 0.64156032 | 520 | 518 |
| C5orf55   | -0.025431345 | 0.562844333 | 0.64094387 | 520 | 520 |
| SPACA5    | -0.025471254 | 0.562231474 | 0.6403183  | 520 | 91  |
| CYP2A7    | -0.025518111 | 0.561512326 | 0.63964378 | 520 | 138 |
| LMO3      | -0.025537701 | 0.561211793 | 0.63933755 | 520 | 448 |
| KCNMB2    | -0.025542801 | 0.56113357  | 0.63932067 | 520 | 474 |
| HADHB     | -0.025545267 | 0.561095751 | 0.63931371 | 520 | 520 |
| LPHN1     | -0.02559224  | 0.560375531 | 0.63863744 | 520 | 520 |
| TTY4C     | -0.02561236  | 0.560067162 | 0.63835816 | 520 | 22  |
| USP48     | -0.025615116 | 0.560024935 | 0.63834612 | 520 | 520 |
| KIAA0284  | -0.025622591 | 0.559910399 | 0.63825164 | 520 | 520 |
| FLJ35776  | -0.02566232  | 0.559301834 | 0.63759397 | 520 | 520 |
| TLR10     | -0.025675167 | 0.559105116 | 0.63740575 | 520 | 513 |
| C8B       | -0.025676119 | 0.559090542 | 0.63740575 | 520 | 167 |
| STK11IP   | -0.025679137 | 0.559044336 | 0.63740575 | 520 | 520 |
| SLC25A17  | -0.025698586 | 0.558746609 | 0.63714113 | 520 | 520 |
| ARHGDI3   | -0.025700462 | 0.558717896 | 0.63714113 | 520 | 355 |
| ARGFXP2   | -0.025735969 | 0.558174542 | 0.63663281 | 520 | 294 |
| LOC285045 | -0.025745068 | 0.558035348 | 0.63651006 | 520 | 105 |
| DNAJB3    | -0.02576046  | 0.557799933 | 0.63631352 | 520 | 262 |
| FAM55D    | -0.025773854 | 0.557595105 | 0.63611585 | 520 | 248 |
| OR1C1     | -0.025780409 | 0.557494874 | 0.63606102 | 520 | 19  |
| OR10Z1    | -0.025796716 | 0.557245573 | 0.635861   | 520 | 10  |
| TNPO2     | -0.025856157 | 0.556337285 | 0.63504019 | 520 | 520 |
| LRR19     | -0.025897821 | 0.555701083 | 0.63438581 | 520 | 398 |
| THAP6     | -0.025937482 | 0.555095773 | 0.63376656 | 520 | 520 |
| TSPAN3    | -0.025942789 | 0.555014809 | 0.63371    | 520 | 520 |
| STARD3    | -0.025990421 | 0.554288345 | 0.63298806 | 520 | 520 |
| RNF17     | -0.026000154 | 0.554139951 | 0.63285444 | 520 | 344 |
| TOX3      | -0.026001377 | 0.554121311 | 0.63285444 | 520 | 330 |
| TPD52L3   | -0.026012015 | 0.553959151 | 0.63279132 | 520 | 52  |

|          |              |             |            |     |     |
|----------|--------------|-------------|------------|-----|-----|
| U2AF2    | -0.026032131 | 0.553652562 | 0.63251276 | 520 | 520 |
| C2orf43  | -0.026085506 | 0.552839508 | 0.63176287 | 520 | 520 |
| LOC84931 | -0.026107906 | 0.552498465 | 0.63144471 | 520 | 155 |
| TRIM49   | -0.026110415 | 0.552460284 | 0.63143686 | 520 | 194 |
| GLYATL1  | -0.026130843 | 0.552149364 | 0.63111727 | 520 | 373 |
| MAP3K15  | -0.026138283 | 0.552036145 | 0.6310594  | 520 | 349 |
| C1orf101 | -0.026151482 | 0.551835316 | 0.63086559 | 520 | 504 |
| REEP5    | -0.026159096 | 0.551719484 | 0.63076893 | 520 | 520 |
| LOC96610 | -0.026172294 | 0.551518722 | 0.63061092 | 520 | 520 |
| ME1      | -0.026174273 | 0.551488634 | 0.63061092 | 520 | 520 |
| OR10J5   | -0.026177822 | 0.551434655 | 0.63058631 | 520 | 15  |
| VCX3B    | -0.026207748 | 0.550979624 | 0.63013744 | 520 | 159 |
| C20orf27 | -0.026210961 | 0.550930774 | 0.63011731 | 520 | 520 |
| SEC61G   | -0.02622198  | 0.55076328  | 0.62996147 | 520 | 520 |
| PCNP     | -0.0262283   | 0.550667219 | 0.62988733 | 520 | 520 |
| SLC26A11 | -0.026279308 | 0.54989227  | 0.62910796 | 520 | 520 |
| NUP133   | -0.026293693 | 0.549673823 | 0.62890078 | 520 | 520 |
| ADAM5P   | -0.026320284 | 0.549270117 | 0.6285745  | 520 | 18  |
| HESX1    | -0.026327233 | 0.549164648 | 0.62848947 | 520 | 512 |
| MT4      | -0.026329968 | 0.549123139 | 0.62847763 | 520 | 132 |
| NEUROG2  | -0.026333585 | 0.549068244 | 0.62845048 | 520 | 304 |
| GPR12    | -0.026376641 | 0.548415002 | 0.62791665 | 520 | 223 |
| DNAJC21  | -0.026399808 | 0.548063658 | 0.62758564 | 520 | 520 |
| NDEL1    | -0.026415194 | 0.547830399 | 0.62742543 | 520 | 520 |
| SNORA1   | -0.026421008 | 0.547742262 | 0.62736012 | 520 | 7   |
| CA7      | -0.026513771 | 0.546337023 | 0.62585727 | 520 | 252 |
| TNFRSF14 | -0.026541197 | 0.545921891 | 0.62541725 | 520 | 520 |
| TIPARP   | -0.026544764 | 0.54586792  | 0.62539095 | 520 | 520 |
| ZNF174   | -0.026597071 | 0.545076648 | 0.62462637 | 520 | 520 |
| CYorf15B | -0.026601517 | 0.545009431 | 0.62458483 | 520 | 406 |
| ENY2     | -0.026602314 | 0.54499737  | 0.62458483 | 520 | 520 |
| GUCA1C   | -0.026606431 | 0.544935125 | 0.62458483 | 520 | 229 |
| USP14    | -0.026609341 | 0.544891133 | 0.62458483 | 520 | 520 |
| MPP5     | -0.026621002 | 0.544714837 | 0.62446017 | 520 | 520 |
| ZNF226   | -0.02667854  | 0.543845391 | 0.6235698  | 520 | 520 |
| C3orf48  | -0.026681143 | 0.543806071 | 0.62356017 | 520 | 168 |
| CD7      | -0.026692479 | 0.543634854 | 0.62343475 | 520 | 520 |
| LUC7L2   | -0.026718549 | 0.543241219 | 0.6230542  | 520 | 520 |
| C18orf10 | -0.026753887 | 0.542707862 | 0.62254872 | 520 | 520 |
| TM4SF5   | -0.026755683 | 0.542680772 | 0.62254872 | 520 | 111 |
| CD160    | -0.02675898  | 0.542631024 | 0.62253141 | 520 | 511 |
| SUGT1    | -0.026766847 | 0.542512328 | 0.62243064 | 520 | 520 |
| C13orf36 | -0.026838072 | 0.541438325 | 0.62137521 | 520 | 174 |
| OR6C4    | -0.026850286 | 0.541254254 | 0.62119932 | 520 | 5   |
| REG1B    | -0.026932959 | 0.540009165 | 0.61991146 | 520 | 39  |
| NTN5     | -0.026933427 | 0.540002125 | 0.61991146 | 520 | 494 |

|           |              |             |            |     |     |
|-----------|--------------|-------------|------------|-----|-----|
| C1QTNF4   | -0.026937479 | 0.539941131 | 0.61991146 | 520 | 431 |
| C3orf38   | -0.026974474 | 0.539384471 | 0.61940592 | 520 | 520 |
| NKTR      | -0.026984021 | 0.539240856 | 0.61927626 | 520 | 520 |
| TBC1D10A  | -0.026991318 | 0.539131116 | 0.6191881  | 520 | 520 |
| MAN2C1    | -0.026997362 | 0.539040217 | 0.61915163 | 520 | 520 |
| TACR1     | -0.027055939 | 0.538159682 | 0.61828111 | 520 | 496 |
| ZNF131    | -0.027062496 | 0.538061165 | 0.61820315 | 520 | 520 |
| CCDC15    | -0.027091391 | 0.537627103 | 0.61781005 | 520 | 520 |
| BDH2      | -0.027100379 | 0.537492131 | 0.61772535 | 520 | 520 |
| AMHR2     | -0.027106858 | 0.537394844 | 0.61764875 | 520 | 338 |
| SLC22A9   | -0.027157522 | 0.536634382 | 0.61684504 | 520 | 168 |
| ID2       | -0.027163887 | 0.53653888  | 0.61677042 | 520 | 520 |
| GDF7      | -0.027219363 | 0.535706874 | 0.61598959 | 520 | 260 |
| OR8U1     | -0.027252141 | 0.535215598 | 0.61552999 | 520 | 4   |
| LOC153684 | -0.027272517 | 0.534910314 | 0.61524908 | 520 | 519 |
| UBXN6     | -0.027344551 | 0.533831755 | 0.61432391 | 520 | 520 |
| EFHC2     | -0.02736927  | 0.533461896 | 0.61396836 | 520 | 501 |
| MCART3P   | -0.027404689 | 0.532932165 | 0.6133937  | 520 | 363 |
| SLC25A35  | -0.027412343 | 0.532817725 | 0.61329699 | 520 | 520 |
| SLC17A8   | -0.027449178 | 0.532267152 | 0.61269823 | 520 | 138 |
| UROC1     | -0.027497237 | 0.53154925  | 0.61197665 | 520 | 258 |
| TMEM143   | -0.027602098 | 0.529984529 | 0.61038428 | 520 | 520 |
| C1orf86   | -0.027669868 | 0.528974533 | 0.60936029 | 520 | 520 |
| APOBEC3H  | -0.027680259 | 0.528819752 | 0.60921679 | 520 | 516 |
| SLK       | -0.027709633 | 0.52838234  | 0.60878244 | 520 | 520 |
| IL12RB2   | -0.027786336 | 0.527241038 | 0.60757163 | 520 | 520 |
| ATP5SL    | -0.027822916 | 0.526697183 | 0.60707708 | 520 | 520 |
| SCRT2     | -0.027825243 | 0.526662606 | 0.60707708 | 520 | 61  |
| COX4NB    | -0.027834652 | 0.526522754 | 0.60695202 | 520 | 520 |
| RBPJL     | -0.027837273 | 0.526483817 | 0.60694184 | 520 | 150 |
| KIR3DP1   | -0.027856059 | 0.526204682 | 0.60665473 | 520 | 56  |
| ACTR1B    | -0.027869909 | 0.525998941 | 0.60648689 | 520 | 520 |
| LRAT      | -0.027873603 | 0.525944062 | 0.60645829 | 520 | 482 |
| TRAF7     | -0.027877525 | 0.525885824 | 0.60644724 | 520 | 520 |
| CNIH2     | -0.027934272 | 0.525043363 | 0.60555631 | 520 | 520 |
| RFX4      | -0.027951166 | 0.524792689 | 0.60537298 | 520 | 164 |
| C10orf68  | -0.027953778 | 0.524753937 | 0.60536291 | 520 | 478 |
| SLC17A1   | -0.028047144 | 0.523369735 | 0.60393884 | 520 | 35  |
| PDHX      | -0.028056066 | 0.523237556 | 0.60391516 | 520 | 520 |
| PIGV      | -0.028116397 | 0.522344217 | 0.60303153 | 520 | 520 |
| PMCHL2    | -0.028131789 | 0.522116437 | 0.60280308 | 520 | 32  |
| NAT15     | -0.028147988 | 0.521876764 | 0.60262989 | 520 | 520 |
| ZNF687    | -0.028152722 | 0.521806731 | 0.60258352 | 520 | 520 |
| NPS       | -0.028161293 | 0.521679948 | 0.60247162 | 520 | 14  |
| MAPK14    | -0.02818038  | 0.521397664 | 0.60218011 | 520 | 520 |
| PARP14    | -0.028207842 | 0.520991661 | 0.60178014 | 520 | 520 |

|            |              |             |            |     |     |
|------------|--------------|-------------|------------|-----|-----|
| C5orf33    | -0.028268228 | 0.520099499 | 0.60109396 | 520 | 520 |
| SYCP2L     | -0.028274487 | 0.520007064 | 0.60102158 | 520 | 435 |
| CTNND1     | -0.028293549 | 0.519725614 | 0.60073071 | 520 | 520 |
| ARL5A      | -0.028316777 | 0.519382766 | 0.60036884 | 520 | 520 |
| LYZL6      | -0.028326724 | 0.519235994 | 0.60023359 | 520 | 11  |
| IMP5       | -0.028330076 | 0.519186529 | 0.60021082 | 520 | 29  |
| PRSS30P    | -0.028368687 | 0.518616999 | 0.59968994 | 520 | 427 |
| SNORA15    | -0.028373472 | 0.518546438 | 0.59964274 | 520 | 18  |
| SNORA42    | -0.028395782 | 0.518217528 | 0.59929676 | 520 | 4   |
| VCX        | -0.028438442 | 0.517588896 | 0.59867278 | 520 | 231 |
| PHF17      | -0.028441029 | 0.517550776 | 0.59866302 | 520 | 520 |
| CLCN2      | -0.028464787 | 0.517200864 | 0.59832692 | 520 | 520 |
| FLJ43860   | -0.028476722 | 0.517025142 | 0.59815795 | 520 | 75  |
| ASB8       | -0.028481327 | 0.516957344 | 0.59811383 | 520 | 520 |
| TCL1A      | -0.028528427 | 0.51626418  | 0.5973804  | 520 | 473 |
| ITLN1      | -0.028548638 | 0.515966882 | 0.59707066 | 520 | 270 |
| OR7G2      | -0.028577368 | 0.515544426 | 0.59661604 | 520 | 16  |
| OR51B4     | -0.028581603 | 0.515482164 | 0.59661604 | 520 | 132 |
| GCM2       | -0.028596318 | 0.515265872 | 0.59649908 | 520 | 40  |
| PLD1       | -0.028600463 | 0.515204959 | 0.59646281 | 520 | 520 |
| RAGE       | -0.028607275 | 0.515104846 | 0.5964154  | 520 | 520 |
| GSX1       | -0.028641715 | 0.514598896 | 0.59593224 | 520 | 10  |
| RUFY4      | -0.028658296 | 0.514355395 | 0.59568446 | 520 | 509 |
| EIF4A1     | -0.028659513 | 0.514337533 | 0.59568446 | 520 | 520 |
| C10orf105  | -0.02866028  | 0.51432626  | 0.59568446 | 520 | 515 |
| CCDC41     | -0.02869857  | 0.513764213 | 0.59517072 | 520 | 520 |
| LCNL1      | -0.028710855 | 0.513583948 | 0.59501092 | 520 | 278 |
| INGX       | -0.028713939 | 0.513538688 | 0.59501092 | 520 | 348 |
| GUSBP1     | -0.028735056 | 0.513228919 | 0.59472145 | 520 | 520 |
| NCRNA00087 | -0.028777761 | 0.512602767 | 0.59413245 | 520 | 519 |
| TMEM42     | -0.028780172 | 0.512567432 | 0.59412564 | 520 | 520 |
| P2RX3      | -0.028794281 | 0.512360651 | 0.5939201  | 520 | 75  |
| CXCL14     | -0.02880804  | 0.512159053 | 0.59375468 | 520 | 520 |
| MSL3       | -0.028842404 | 0.51165572  | 0.59328958 | 520 | 520 |
| ITGB1BP1   | -0.02887511  | 0.511176903 | 0.59282056 | 520 | 520 |
| GAPDH      | -0.028907941 | 0.510696489 | 0.59239667 | 520 | 520 |
| EBAG9      | -0.028928055 | 0.510402283 | 0.59216062 | 520 | 520 |
| GABPA      | -0.028935356 | 0.510295507 | 0.59210488 | 520 | 520 |
| FBN3       | -0.028942719 | 0.510187853 | 0.59201403 | 520 | 358 |
| MTMR15     | -0.029000097 | 0.509349243 | 0.59114298 | 520 | 520 |
| METTL7A    | -0.029026389 | 0.508965228 | 0.5907653  | 520 | 520 |
| CCDC85B    | -0.029084129 | 0.508122386 | 0.58988887 | 520 | 520 |
| ZNF540     | -0.029084391 | 0.508118571 | 0.58988887 | 520 | 515 |
| LOC401588  | -0.029096876 | 0.50793642  | 0.58974089 | 520 | 520 |
| FGFR2      | -0.029116799 | 0.507645838 | 0.58947139 | 520 | 520 |
| C1orf157   | -0.029130942 | 0.507439593 | 0.58932275 | 520 | 111 |

|              |              |             |            |     |     |
|--------------|--------------|-------------|------------|-----|-----|
| LOC613037    | -0.029138878 | 0.507323896 | 0.58926723 | 520 | 490 |
| ZNF571       | -0.029208266 | 0.506312841 | 0.58812674 | 520 | 519 |
| F13B         | -0.029233587 | 0.505944146 | 0.58780006 | 520 | 62  |
| KNCN         | -0.029236233 | 0.505905623 | 0.58780006 | 520 | 64  |
| HIST2H2BE    | -0.029238105 | 0.505878378 | 0.58780006 | 520 | 520 |
| MLLT6        | -0.029259049 | 0.505573554 | 0.58753877 | 520 | 520 |
| KLRC4        | -0.029276414 | 0.505320879 | 0.58734668 | 520 | 349 |
| CYB561D2     | -0.029282173 | 0.505237105 | 0.58728316 | 520 | 520 |
| TMPRSS3      | -0.029285166 | 0.50519356  | 0.5872664  | 520 | 516 |
| PTPN20A      | -0.029291513 | 0.505101235 | 0.58719293 | 520 | 158 |
| SFTPD        | -0.029310335 | 0.504827503 | 0.58691954 | 520 | 520 |
| C22orf33     | -0.029342614 | 0.504358251 | 0.58643062 | 520 | 6   |
| CTRB2        | -0.029348557 | 0.504271884 | 0.58636401 | 520 | 202 |
| SNORA9       | -0.029397384 | 0.503562561 | 0.58560675 | 520 | 36  |
| FAM59A       | -0.029453771 | 0.502744071 | 0.58475608 | 520 | 520 |
| GUSBL1       | -0.029477056 | 0.502406286 | 0.58439691 | 520 | 518 |
| FAM22F       | -0.029497789 | 0.502105609 | 0.58408085 | 520 | 515 |
| PROCA1       | -0.029505461 | 0.501994382 | 0.58401885 | 520 | 518 |
| RBMX1E       | -0.029505925 | 0.501987646 | 0.58401885 | 520 | 4   |
| LRRC8A       | -0.029535524 | 0.501558622 | 0.58364659 | 520 | 520 |
| C14orf115    | -0.029546968 | 0.501392795 | 0.58348729 | 520 | 224 |
| LCE1D        | -0.029551881 | 0.501321619 | 0.58343813 | 520 | 173 |
| ARNTL2       | -0.029606023 | 0.500537555 | 0.58259289 | 520 | 520 |
| SNORA29      | -0.029652563 | 0.499864091 | 0.58184261 | 520 | 31  |
| GTF2E1       | -0.029692521 | 0.499286254 | 0.58123711 | 520 | 520 |
| TRIM33       | -0.029710327 | 0.499028886 | 0.58097104 | 520 | 520 |
| FBXO8        | -0.029729155 | 0.498756809 | 0.58068782 | 520 | 520 |
| UBE2L6       | -0.029730552 | 0.498736619 | 0.58068782 | 520 | 520 |
| PRSS1        | -0.029758732 | 0.498329569 | 0.58032443 | 520 | 147 |
| PER3         | -0.029770089 | 0.498165557 | 0.58016693 | 520 | 520 |
| LOC100132288 | -0.029787914 | 0.497908209 | 0.57993422 | 520 | 520 |
| HIST1H2BF    | -0.029790755 | 0.497867211 | 0.57991996 | 520 | 476 |
| SNORD15B     | -0.029813066 | 0.497545203 | 0.57971232 | 520 | 136 |
| CNTN2        | -0.029822399 | 0.497410544 | 0.57958892 | 520 | 413 |
| OR5AN1       | -0.029839557 | 0.497163022 | 0.57936746 | 520 | 5   |
| FAM188A      | -0.02987337  | 0.496675437 | 0.57893309 | 520 | 520 |
| SPIN4        | -0.029877663 | 0.49661354  | 0.57889441 | 520 | 520 |
| PPARGC1B     | -0.029880206 | 0.496576891 | 0.57888515 | 520 | 519 |
| QTRTD1       | -0.02992974  | 0.49586314  | 0.57822024 | 520 | 520 |
| OLIG3        | -0.029982344 | 0.495105737 | 0.57743722 | 520 | 67  |
| C22orf23     | -0.029984363 | 0.495076686 | 0.57743674 | 520 | 520 |
| HMGCS2       | -0.030011745 | 0.494682697 | 0.57707734 | 520 | 312 |
| SSX7         | -0.030046939 | 0.494176552 | 0.57655361 | 520 | 6   |
| TMEM63B      | -0.030055852 | 0.494048404 | 0.57647081 | 520 | 520 |
| HM13         | -0.030065535 | 0.493909211 | 0.57634174 | 520 | 520 |
| NSUN3        | -0.030116944 | 0.493170575 | 0.57568143 | 520 | 520 |



|           |              |             |            |     |     |
|-----------|--------------|-------------|------------|-----|-----|
| CHL1      | -0.0301218   | 0.493100842 | 0.57566497 | 520 | 516 |
| NPSR1     | -0.030167787 | 0.492440651 | 0.57496082 | 520 | 390 |
| MFN1      | -0.030223919 | 0.491635474 | 0.57434795 | 520 | 520 |
| CELA3A    | -0.030224799 | 0.491622859 | 0.57434795 | 520 | 41  |
| C21orf91  | -0.030256245 | 0.491172086 | 0.57391168 | 520 | 520 |
| TSNAXIP1  | -0.030280535 | 0.490824057 | 0.57360475 | 520 | 519 |
| SOX7      | -0.03037885  | 0.489416723 | 0.57212585 | 520 | 520 |
| SCGB2A2   | -0.030382964 | 0.489357894 | 0.57209025 | 520 | 122 |
| PPPDE2    | -0.030407719 | 0.489003895 | 0.5717427  | 520 | 520 |
| DGKZ      | -0.030421149 | 0.488811915 | 0.57158452 | 520 | 520 |
| TRIM45    | -0.030444    | 0.488485334 | 0.57123576 | 520 | 520 |
| SNORA28   | -0.030475592 | 0.488034038 | 0.57077422 | 520 | 3   |
| ATAD2     | -0.030481995 | 0.487942588 | 0.57073347 | 520 | 520 |
| TAF8      | -0.030495065 | 0.487755963 | 0.57058138 | 520 | 520 |
| LOC146481 | -0.030499259 | 0.487696097 | 0.57055754 | 520 | 21  |
| GSTM1     | -0.030500003 | 0.487685467 | 0.57055754 | 520 | 481 |
| PRAMEF17  | -0.030530898 | 0.487244509 | 0.57014846 | 520 | 10  |
| TTC14     | -0.030549577 | 0.486978019 | 0.5698697  | 520 | 520 |
| RCBTB2    | -0.030604378 | 0.486196605 | 0.56902132 | 520 | 520 |
| NIP7      | -0.030605223 | 0.486184564 | 0.56902132 | 520 | 520 |
| PNLIPRP1  | -0.030622812 | 0.485933918 | 0.56881293 | 520 | 31  |
| TMCO2     | -0.030628306 | 0.485855638 | 0.56877997 | 520 | 98  |
| PELI3     | -0.030633126 | 0.485786968 | 0.56873997 | 520 | 520 |
| KRTAP27-1 | -0.030640611 | 0.485680333 | 0.56864814 | 520 | 14  |
| COL6A4P2  | -0.030662421 | 0.485369723 | 0.56835047 | 520 | 371 |
| DEFB118   | -0.030663125 | 0.485359699 | 0.56835047 | 520 | 21  |
| GTSF1L    | -0.030726508 | 0.484457602 | 0.56738126 | 520 | 403 |
| CTDP1     | -0.03072723  | 0.484447337 | 0.56738126 | 520 | 520 |
| RNF5P1    | -0.030729364 | 0.484416972 | 0.56738126 | 520 | 520 |
| OR5A1     | -0.030744489 | 0.484201854 | 0.56718056 | 520 | 21  |
| KRTAP4-1  | -0.030744842 | 0.484196836 | 0.56718056 | 520 | 468 |
| DLEC1     | -0.03081693  | 0.483172255 | 0.56607317 | 520 | 484 |
| HSD3B2    | -0.030820378 | 0.483123285 | 0.56604869 | 520 | 226 |
| UHRF1     | -0.03084095  | 0.482831125 | 0.56577213 | 520 | 520 |
| PWP1      | -0.030884632 | 0.482211083 | 0.56507842 | 520 | 520 |
| BAG3      | -0.030888801 | 0.482151933 | 0.56507478 | 520 | 520 |
| MED22     | -0.030896417 | 0.482043872 | 0.56498097 | 520 | 520 |
| PLGLA     | -0.030909818 | 0.481853772 | 0.56479099 | 520 | 15  |
| DNTTIP1   | -0.030918559 | 0.481729804 | 0.56471134 | 520 | 520 |
| NBPF4     | -0.030933362 | 0.481519891 | 0.56453091 | 520 | 283 |
| MICALL2   | -0.030969091 | 0.481013465 | 0.56406836 | 520 | 520 |
| OR8S1     | -0.030999969 | 0.480576012 | 0.56358815 | 520 | 61  |
| SMN1      | -0.031010548 | 0.480426199 | 0.56347801 | 520 | 472 |
| KTELC1    | -0.031014257 | 0.480373668 | 0.56344917 | 520 | 520 |
| NCBP2     | -0.031023543 | 0.480242198 | 0.5633605  | 520 | 520 |
| DCDC1     | -0.031054637 | 0.479802076 | 0.56294246 | 520 | 365 |

|              |              |             |            |     |     |
|--------------|--------------|-------------|------------|-----|-----|
| ASCC2        | -0.03105923  | 0.479737082 | 0.56289895 | 520 | 520 |
| CYMP         | -0.031065445 | 0.47964915  | 0.56282853 | 520 | 132 |
| GUSBP3       | -0.03106644  | 0.479635061 | 0.56282853 | 520 | 520 |
| ACADM        | -0.031082678 | 0.479405361 | 0.56260794 | 520 | 520 |
| DLGAP2       | -0.031107133 | 0.479059524 | 0.56223481 | 520 | 445 |
| HLA-E        | -0.031127106 | 0.478777172 | 0.56199955 | 520 | 520 |
| LOC100130093 | -0.031142991 | 0.478552664 | 0.56177074 | 520 | 520 |
| C17orf108    | -0.031143354 | 0.478547545 | 0.56177074 | 520 | 520 |
| TMEM128      | -0.031177226 | 0.478069028 | 0.56138302 | 520 | 520 |
| LARS         | -0.031212745 | 0.477567539 | 0.56087552 | 520 | 520 |
| MX2          | -0.031226519 | 0.477373136 | 0.56067986 | 520 | 520 |
| BZW2         | -0.031298265 | 0.47636126  | 0.5596544  | 520 | 520 |
| LYPLA1       | -0.031299882 | 0.476338461 | 0.5596544  | 520 | 520 |
| H1FOO        | -0.031342856 | 0.475732944 | 0.55913574 | 520 | 63  |
| OR5B12       | -0.031348102 | 0.475659055 | 0.55909001 | 520 | 53  |
| GNL1         | -0.031365534 | 0.475413578 | 0.55883406 | 520 | 520 |
| WDR93        | -0.031372533 | 0.475315031 | 0.55875079 | 520 | 428 |
| CXorf27      | -0.031447612 | 0.474258676 | 0.55760653 | 520 | 97  |
| MID1IP1      | -0.031483412 | 0.473755422 | 0.55704731 | 520 | 520 |
| SEC23B       | -0.031506749 | 0.473427516 | 0.55669422 | 520 | 520 |
| NCRNA00162   | -0.031549856 | 0.472822164 | 0.55607968 | 520 | 468 |
| FAM84A       | -0.031564738 | 0.472613278 | 0.55589886 | 520 | 520 |
| CECR5        | -0.031566106 | 0.472594083 | 0.55589886 | 520 | 520 |
| SRGAP3       | -0.031569014 | 0.472553273 | 0.55589313 | 520 | 520 |
| KCNIP4       | -0.031579483 | 0.472406358 | 0.55578516 | 520 | 519 |
| FGF23        | -0.031603103 | 0.472074999 | 0.55546996 | 520 | 134 |
| GJB2         | -0.031608433 | 0.472000257 | 0.55543701 | 520 | 520 |
| DNAI1        | -0.03167648  | 0.471046439 | 0.55447638 | 520 | 205 |
| SIL1         | -0.031698278 | 0.470741125 | 0.55421405 | 520 | 520 |
| KRTAP4-4     | -0.031719518 | 0.470443733 | 0.55389627 | 520 | 22  |
| OR10G4       | -0.031720659 | 0.470427759 | 0.55389627 | 520 | 16  |
| UBE2F        | -0.031798132 | 0.469343905 | 0.55285959 | 520 | 520 |
| HPCA         | -0.031806264 | 0.469230212 | 0.55275796 | 520 | 501 |
| TPTE2P3      | -0.031808105 | 0.46920448  | 0.55275796 | 520 | 224 |
| OR1S2        | -0.031820317 | 0.469033791 | 0.55259114 | 520 | 10  |
| FAM178B      | -0.031939657 | 0.467367527 | 0.55088553 | 520 | 509 |
| KIAA0895     | -0.031942798 | 0.467323707 | 0.55088357 | 520 | 520 |
| LOC100128977 | -0.031953565 | 0.467173542 | 0.55075347 | 520 | 14  |
| TTY9B        | -0.031961186 | 0.467067275 | 0.55066038 | 520 | 19  |
| OR5AP2       | -0.031965635 | 0.467005242 | 0.55061944 | 520 | 29  |
| AGAP5        | -0.031966973 | 0.466986589 | 0.55061944 | 520 | 518 |
| OR52E2       | -0.032009251 | 0.466397336 | 0.54996701 | 520 | 6   |
| CDHR3        | -0.032039317 | 0.465978548 | 0.54950532 | 520 | 512 |
| C10orf2      | -0.03211207  | 0.464966011 | 0.54841126 | 520 | 520 |
| SFRS4        | -0.032159332 | 0.464308903 | 0.54769654 | 520 | 520 |
| RLBP1        | -0.032176222 | 0.46407421  | 0.54748376 | 520 | 263 |

|           |              |             |            |     |     |
|-----------|--------------|-------------|------------|-----|-----|
| SUZ12     | -0.032176456 | 0.464070956 | 0.54748376 | 520 | 520 |
| DAGLB     | -0.032201722 | 0.463719976 | 0.54712988 | 520 | 520 |
| RAB8A     | -0.03222173  | 0.463442149 | 0.54683407 | 520 | 520 |
| MGC14436  | -0.032249228 | 0.463060472 | 0.54647965 | 520 | 354 |
| GPR22     | -0.032249674 | 0.463054274 | 0.54647965 | 520 | 300 |
| C3orf15   | -0.032251885 | 0.463023599 | 0.54647965 | 520 | 452 |
| LRTOMT    | -0.032282435 | 0.462599777 | 0.5460638  | 520 | 520 |
| HCG2P7    | -0.032286898 | 0.462537869 | 0.54605466 | 520 | 334 |
| NTRK2     | -0.032354477 | 0.461601176 | 0.54501265 | 520 | 520 |
| IL23R     | -0.032374496 | 0.461323911 | 0.54478099 | 520 | 440 |
| AKAP1     | -0.032377066 | 0.461288316 | 0.54477086 | 520 | 520 |
| MMP25     | -0.032384158 | 0.461190121 | 0.54468679 | 520 | 520 |
| KRTAP10-8 | -0.032391758 | 0.461084894 | 0.54459441 | 520 | 9   |
| MBD3L1    | -0.032404658 | 0.460906313 | 0.54447917 | 520 | 30  |
| RFX5      | -0.03241033  | 0.460827821 | 0.54441834 | 520 | 520 |
| GAD1      | -0.032427337 | 0.46059247  | 0.54417218 | 520 | 516 |
| TRIM47    | -0.032482726 | 0.459826471 | 0.54342638 | 520 | 520 |
| ANKRD31   | -0.032493767 | 0.459673855 | 0.54327786 | 520 | 413 |
| C22orf29  | -0.032498777 | 0.459604625 | 0.54322788 | 520 | 520 |
| IFT57     | -0.032504209 | 0.459529561 | 0.54320284 | 520 | 520 |
| NME6      | -0.032506743 | 0.459494544 | 0.54319329 | 520 | 520 |
| ZNF354B   | -0.032523436 | 0.459263911 | 0.54298432 | 520 | 520 |
| PDE6B     | -0.032525446 | 0.459236154 | 0.54298334 | 520 | 518 |
| UGT3A1    | -0.032528651 | 0.459191886 | 0.54296283 | 520 | 156 |
| SFXN1     | -0.032546947 | 0.458939205 | 0.54272771 | 520 | 520 |
| TAS2R5    | -0.032562016 | 0.458731149 | 0.54251348 | 520 | 487 |
| EYA2      | -0.032564407 | 0.458698145 | 0.54251348 | 520 | 519 |
| GSTTP1    | -0.03257904  | 0.458496176 | 0.54236284 | 520 | 49  |
| SLC25A34  | -0.032662936 | 0.457339152 | 0.54118466 | 520 | 519 |
| URGCP     | -0.032663333 | 0.457333686 | 0.54118466 | 520 | 520 |
| ITLN2     | -0.032668621 | 0.457260817 | 0.54115548 | 520 | 387 |
| TAS2R20   | -0.032673068 | 0.457199533 | 0.54111471 | 520 | 519 |
| BTF3L1    | -0.032730648 | 0.456406534 | 0.54030302 | 520 | 183 |
| PRKAG1    | -0.032736618 | 0.456324357 | 0.54023746 | 520 | 520 |
| ABCB10    | -0.03273891  | 0.456292803 | 0.54023182 | 520 | 520 |
| SCARNA4   | -0.032759443 | 0.456010252 | 0.53999241 | 520 | 4   |
| SLC35A1   | -0.032813955 | 0.455260566 | 0.53916798 | 520 | 520 |
| WRB       | -0.032814482 | 0.455253329 | 0.53916798 | 520 | 520 |
| C7orf23   | -0.032817755 | 0.455208337 | 0.53916798 | 520 | 520 |
| LAG3      | -0.03284894  | 0.454779808 | 0.53878849 | 520 | 520 |
| KIR3DX1   | -0.032854489 | 0.454703577 | 0.53872983 | 520 | 220 |
| SLFN14    | -0.03286633  | 0.454540939 | 0.53860043 | 520 | 304 |
| LCAT      | -0.032878945 | 0.454367695 | 0.53845843 | 520 | 520 |
| MESP2     | -0.032903728 | 0.45402747  | 0.53811849 | 520 | 494 |
| WFDC9     | -0.032910099 | 0.453940034 | 0.53807094 | 520 | 6   |
| HAGHL     | -0.032931646 | 0.45364438  | 0.53782251 | 520 | 520 |

|           |              |             |            |     |     |
|-----------|--------------|-------------|------------|-----|-----|
| DCUN1D3   | -0.032939152 | 0.453541416 | 0.53773206 | 520 | 520 |
| DYX1C1    | -0.032949179 | 0.453403892 | 0.53760062 | 520 | 517 |
| WNT8B     | -0.032960337 | 0.453250873 | 0.53745079 | 520 | 274 |
| OR2T2     | -0.03297907  | 0.45299404  | 0.53724102 | 520 | 28  |
| CHRNA2    | -0.032988829 | 0.452860281 | 0.53711398 | 520 | 295 |
| LRRC37B   | -0.033020813 | 0.452422054 | 0.53668892 | 520 | 520 |
| ADAP2     | -0.033024824 | 0.452367109 | 0.53665531 | 520 | 520 |
| LOC146336 | -0.033037523 | 0.452193198 | 0.53648056 | 520 | 392 |
| LOC729176 | -0.03306857  | 0.451768144 | 0.5360709  | 520 | 520 |
| QDPR      | -0.033082951 | 0.451571345 | 0.535932   | 520 | 520 |
| TDRD10    | -0.033160512 | 0.450510745 | 0.53473621 | 520 | 505 |
| KGFLP1    | -0.033196495 | 0.450019186 | 0.53424709 | 520 | 382 |
| C3orf22   | -0.033228479 | 0.449582508 | 0.53379154 | 520 | 26  |
| TUBGCP5   | -0.03326081  | 0.449141334 | 0.53329913 | 520 | 520 |
| ATG16L1   | -0.033310487 | 0.44846394  | 0.53262027 | 520 | 520 |
| IFNA8     | -0.033311781 | 0.448446297 | 0.53262027 | 520 | 49  |
| NAGPA     | -0.033318921 | 0.448348993 | 0.53255676 | 520 | 520 |
| CEACAM20  | -0.033332585 | 0.448162802 | 0.53238805 | 520 | 87  |
| RAP2B     | -0.033357724 | 0.447820351 | 0.53204393 | 520 | 520 |
| LOC144776 | -0.033371953 | 0.447626595 | 0.53187641 | 520 | 17  |
| RBKS      | -0.033408836 | 0.447124559 | 0.53131119 | 520 | 520 |
| NCR3      | -0.033410716 | 0.447098978 | 0.53131119 | 520 | 504 |
| STX8      | -0.033465627 | 0.446352185 | 0.53048718 | 520 | 520 |
| DNAJC16   | -0.033490435 | 0.446015027 | 0.53021147 | 520 | 520 |
| TRAPPC6A  | -0.033521759 | 0.445589519 | 0.52976811 | 520 | 520 |
| C14orf19  | -0.033534766 | 0.445412901 | 0.52960492 | 520 | 520 |
| TRIM21    | -0.033535675 | 0.445400552 | 0.52960492 | 520 | 520 |
| OR1L1     | -0.033540836 | 0.445330486 | 0.52958504 | 520 | 12  |
| RBM33     | -0.033601964 | 0.444501054 | 0.52872341 | 520 | 520 |
| OR5H6     | -0.033606707 | 0.444436735 | 0.52869549 | 520 | 14  |
| PCK1      | -0.033610636 | 0.444383449 | 0.52867708 | 520 | 347 |
| RTCD1     | -0.033611607 | 0.44437029  | 0.52867708 | 520 | 520 |
| PCNT      | -0.033615137 | 0.444322419 | 0.52866686 | 520 | 520 |
| SNORA27   | -0.033616874 | 0.444298874 | 0.52866686 | 520 | 38  |
| HORMAD1   | -0.033625496 | 0.444181982 | 0.52856214 | 520 | 422 |
| OR8G2     | -0.033645404 | 0.443912161 | 0.52827224 | 520 | 5   |
| IFI35     | -0.0336621   | 0.443685934 | 0.52807798 | 520 | 520 |
| SULT2A1   | -0.033716038 | 0.442955558 | 0.52728944 | 520 | 60  |
| FANCB     | -0.033728033 | 0.442793227 | 0.52712733 | 520 | 520 |
| TNFSF9    | -0.033757372 | 0.442396312 | 0.52673313 | 520 | 520 |
| MAP2K6    | -0.03377392  | 0.442172527 | 0.52651275 | 520 | 519 |
| ACTL9     | -0.033777852 | 0.442119366 | 0.52648054 | 520 | 32  |
| NELL2     | -0.033858104 | 0.441035113 | 0.52531349 | 520 | 520 |
| TOX4      | -0.033902571 | 0.440434985 | 0.52466799 | 520 | 520 |
| HOXD10    | -0.033953854 | 0.439743452 | 0.52394347 | 520 | 520 |
| TMIGD1    | -0.034037385 | 0.4386184   | 0.52271285 | 520 | 53  |

|            |              |             |            |     |     |
|------------|--------------|-------------|------------|-----|-----|
| KRTAP10-1  | -0.034115471 | 0.437568167 | 0.52155373 | 520 | 26  |
| CENPJ      | -0.034120401 | 0.437501911 | 0.52153642 | 520 | 520 |
| ZNF273     | -0.034126583 | 0.437418838 | 0.52146822 | 520 | 520 |
| KCNC2      | -0.034153237 | 0.437060755 | 0.52107214 | 520 | 97  |
| SNORD115-7 | -0.034160109 | 0.436968458 | 0.5209929  | 520 | 4   |
| ERCC1      | -0.034170881 | 0.436823806 | 0.52088204 | 520 | 520 |
| OR5H14     | -0.034195664 | 0.436491108 | 0.52054688 | 520 | 4   |
| SNORA32    | -0.034208685 | 0.436316372 | 0.52036927 | 520 | 9   |
| AOX2P      | -0.0342213   | 0.436147118 | 0.52022895 | 520 | 91  |
| OR2T27     | -0.034244251 | 0.435839285 | 0.51995405 | 520 | 5   |
| KRTAP9-2   | -0.034442864 | 0.433180609 | 0.5170882  | 520 | 92  |
| ISX        | -0.034447713 | 0.433115807 | 0.51704145 | 520 | 108 |
| LOC400752  | -0.034486674 | 0.432595413 | 0.51648137 | 520 | 519 |
| FER1L5     | -0.034491615 | 0.432529441 | 0.51643319 | 520 | 386 |
| RTF1       | -0.034534934 | 0.43195131  | 0.51583454 | 520 | 520 |
| PRDM7      | -0.034579068 | 0.431362766 | 0.51525377 | 520 | 119 |
| CPA6       | -0.034590603 | 0.431209011 | 0.51516166 | 520 | 486 |
| C14orf64   | -0.03459403  | 0.431163345 | 0.51515923 | 520 | 515 |
| ZNF705A    | -0.034602285 | 0.431053343 | 0.51506724 | 520 | 215 |
| MOGAT3     | -0.034608333 | 0.43097276  | 0.51501874 | 520 | 70  |
| ARL9       | -0.034611999 | 0.430923918 | 0.51501874 | 520 | 513 |
| C2orf83    | -0.034619001 | 0.430830639 | 0.5149537  | 520 | 54  |
| KIAA1958   | -0.0346345   | 0.430624208 | 0.51479851 | 520 | 519 |
| B3GNT5     | -0.034730716 | 0.429344004 | 0.51348117 | 520 | 520 |
| GPR18      | -0.034759999 | 0.428954809 | 0.51307657 | 520 | 517 |
| OR4X1      | -0.034778349 | 0.428711032 | 0.5128154  | 520 | 16  |
| 7-Mar      | -0.034800119 | 0.428421916 | 0.51253038 | 520 | 520 |
| C3orf49    | -0.034803764 | 0.428373521 | 0.51250289 | 520 | 171 |
| SYT17      | -0.034808534 | 0.428310206 | 0.51245754 | 520 | 520 |
| SNORA54    | -0.03482727  | 0.428061514 | 0.51222078 | 520 | 10  |
| CRNKL1     | -0.034851035 | 0.427746192 | 0.51190422 | 520 | 520 |
| TOPORS     | -0.034860707 | 0.427617904 | 0.51184183 | 520 | 520 |
| AQP4       | -0.034899438 | 0.427104382 | 0.51134858 | 520 | 338 |
| TIA1       | -0.034920321 | 0.426827666 | 0.51107797 | 520 | 520 |
| COQ10A     | -0.034923288 | 0.426788354 | 0.51106125 | 520 | 520 |
| CA2        | -0.034923978 | 0.426779209 | 0.51106125 | 520 | 520 |
| PCGF5      | -0.034930935 | 0.426687046 | 0.51100063 | 520 | 520 |
| LRRC37A2   | -0.034934726 | 0.426636835 | 0.51097084 | 520 | 520 |
| TPH2       | -0.034970042 | 0.426169207 | 0.51047142 | 520 | 65  |
| MCCD1      | -0.034989228 | 0.425915291 | 0.51019758 | 520 | 31  |
| KRTAP12-2  | -0.035014106 | 0.425586176 | 0.50983363 | 520 | 26  |
| NLE1       | -0.035028346 | 0.425397855 | 0.50963831 | 520 | 520 |
| KTI12      | -0.035086141 | 0.424634033 | 0.50884416 | 520 | 520 |
| GATM       | -0.035094043 | 0.424529655 | 0.50874931 | 520 | 520 |
| ARHGAP39   | -0.035115147 | 0.424250986 | 0.5084758  | 520 | 520 |
| BOK        | -0.035124738 | 0.42412437  | 0.50835427 | 520 | 520 |

|           |              |             |            |     |     |
|-----------|--------------|-------------|------------|-----|-----|
| RNF148    | -0.035161215 | 0.423643036 | 0.50786791 | 520 | 372 |
| DEFB104A  | -0.035171637 | 0.423505573 | 0.50776349 | 520 | 68  |
| PUS3      | -0.035243933 | 0.422552706 | 0.50668963 | 520 | 520 |
| DBF4B     | -0.035245463 | 0.422532561 | 0.50668963 | 520 | 520 |
| C12orf43  | -0.035315394 | 0.421612081 | 0.50570377 | 520 | 520 |
| NCL       | -0.035384771 | 0.420700065 | 0.50475997 | 520 | 520 |
| LRRC8D    | -0.03539908  | 0.420512109 | 0.50456448 | 520 | 520 |
| DUSP11    | -0.035404314 | 0.420443361 | 0.50454204 | 520 | 520 |
| DNAJB6    | -0.035422075 | 0.420210154 | 0.5042922  | 520 | 520 |
| TEKT2     | -0.035434627 | 0.420045381 | 0.50412446 | 520 | 470 |
| OR1K1     | -0.03544033  | 0.419970529 | 0.50406463 | 520 | 97  |
| MMACHC    | -0.035471606 | 0.419560173 | 0.50360208 | 520 | 520 |
| OR13C8    | -0.0354746   | 0.419520901 | 0.50358492 | 520 | 13  |
| C3orf43   | -0.035478159 | 0.419474221 | 0.50355886 | 520 | 443 |
| UBE2Q1    | -0.035478773 | 0.419466165 | 0.50355886 | 520 | 520 |
| OR10J3    | -0.035487533 | 0.41935129  | 0.50350122 | 520 | 29  |
| RPRD1A    | -0.035494923 | 0.419254401 | 0.50341486 | 520 | 520 |
| TACR2     | -0.035496253 | 0.419236962 | 0.50341486 | 520 | 517 |
| MYCNOS    | -0.035574454 | 0.41821242  | 0.50246292 | 520 | 162 |
| DIS3L2    | -0.035631726 | 0.417463018 | 0.50162233 | 520 | 520 |
| ZNF562    | -0.035651943 | 0.417198666 | 0.50133456 | 520 | 520 |
| CNNM1     | -0.035675774 | 0.416887179 | 0.50101997 | 520 | 488 |
| OR6F1     | -0.035685118 | 0.41676509  | 0.5009031  | 520 | 20  |
| SLC13A1   | -0.035703394 | 0.41652635  | 0.500646   | 520 | 55  |
| DAOA      | -0.035773724 | 0.41560837  | 0.49963198 | 520 | 8   |
| ARHGAP11A | -0.035786217 | 0.415445435 | 0.49946588 | 520 | 520 |
| TP53TG5   | -0.03581223  | 0.415106274 | 0.49911764 | 520 | 55  |
| OR2F1     | -0.035836547 | 0.414789381 | 0.4987961  | 520 | 13  |
| SIRT2     | -0.035850234 | 0.41461108  | 0.49861143 | 520 | 520 |
| PCSK6     | -0.035866847 | 0.414394723 | 0.49838096 | 520 | 520 |
| DDX27     | -0.035879152 | 0.414234506 | 0.49821799 | 520 | 520 |
| SLC1A5    | -0.035897751 | 0.413992421 | 0.49798085 | 520 | 520 |
| NAPEPLD   | -0.035929956 | 0.413573429 | 0.49754159 | 520 | 520 |
| MAPK8IP3  | -0.035939354 | 0.41345121  | 0.49742424 | 520 | 520 |
| HCP5      | -0.035958341 | 0.413204346 | 0.4971569  | 520 | 520 |
| FLJ40852  | -0.035965356 | 0.413113164 | 0.49707685 | 520 | 517 |
| SNORA11E  | -0.035969916 | 0.413053887 | 0.49703518 | 520 | 4   |
| LOC728410 | -0.035971689 | 0.413030848 | 0.49703518 | 520 | 22  |
| FBXW7     | -0.035996627 | 0.412706821 | 0.49670648 | 520 | 520 |
| ZNRF2     | -0.036023438 | 0.412358636 | 0.49634668 | 520 | 520 |
| TMEM88B   | -0.036040733 | 0.412134122 | 0.49610605 | 520 | 308 |
| C20orf197 | -0.036089421 | 0.411502464 | 0.495464   | 520 | 491 |
| SNORA80   | -0.036160564 | 0.410580514 | 0.49444252 | 520 | 15  |
| ORM1      | -0.036173853 | 0.410408428 | 0.49432385 | 520 | 386 |
| EIF4A2    | -0.036190253 | 0.410196122 | 0.49412716 | 520 | 520 |
| MLNR      | -0.036197796 | 0.410098501 | 0.49409812 | 520 | 272 |

|              |              |             |            |     |     |
|--------------|--------------|-------------|------------|-----|-----|
| EHMT1        | -0.036200967 | 0.410057462 | 0.4940782  | 520 | 520 |
| HIF1AN       | -0.036226274 | 0.40973005  | 0.4937132  | 520 | 520 |
| SLC5A7       | -0.036270838 | 0.409153872 | 0.49307786 | 520 | 142 |
| RANBP17      | -0.036300228 | 0.408774144 | 0.49267913 | 520 | 502 |
| PGBD4        | -0.036304061 | 0.408724634 | 0.4926489  | 520 | 520 |
| SNORA71C     | -0.036306561 | 0.408692349 | 0.49263944 | 520 | 31  |
| OTUD6A       | -0.03632465  | 0.408458768 | 0.49238731 | 520 | 50  |
| GRXCR2       | -0.036420805 | 0.407218451 | 0.49100956 | 520 | 131 |
| LOC100133920 | -0.036426257 | 0.407148194 | 0.4909542  | 520 | 101 |
| SNORA12      | -0.036429462 | 0.407106898 | 0.4909542  | 520 | 44  |
| RPL13AP17    | -0.036435787 | 0.407025395 | 0.4908942  | 520 | 78  |
| OR7C2        | -0.036443056 | 0.406931756 | 0.49081062 | 520 | 24  |
| MIER2        | -0.036475078 | 0.406519363 | 0.49037189 | 520 | 520 |
| OPN1LW       | -0.036488942 | 0.406340897 | 0.49018593 | 520 | 45  |
| KIR2DL3      | -0.036502212 | 0.406170125 | 0.49000924 | 520 | 361 |
| SELS         | -0.036541278 | 0.405667624 | 0.48952017 | 520 | 520 |
| OR7E24       | -0.036550306 | 0.40555155  | 0.48943868 | 520 | 100 |
| RAD18        | -0.036554906 | 0.405492405 | 0.48939659 | 520 | 520 |
| MAST4        | -0.036571216 | 0.405282785 | 0.48923145 | 520 | 520 |
| MAPK6        | -0.036616978 | 0.404694951 | 0.4885511  | 520 | 520 |
| YBX1         | -0.036644317 | 0.404344009 | 0.48815666 | 520 | 520 |
| IGJ          | -0.036658904 | 0.404156832 | 0.4879599  | 520 | 520 |
| C1orf173     | -0.036673916 | 0.403964262 | 0.48778582 | 520 | 351 |
| AIFM2        | -0.036698952 | 0.403643232 | 0.48742736 | 520 | 520 |
| SPANXN2      | -0.036703469 | 0.403585318 | 0.48738662 | 520 | 11  |
| CCDC52       | -0.036724526 | 0.403315449 | 0.48708988 | 520 | 520 |
| OR4Q3        | -0.036742063 | 0.403090779 | 0.48687687 | 520 | 22  |
| C8orf42      | -0.036775969 | 0.402656596 | 0.48641071 | 520 | 520 |
| RAB21        | -0.036784154 | 0.402551828 | 0.48631329 | 520 | 520 |
| PLG          | -0.036807203 | 0.402256884 | 0.48604433 | 520 | 89  |
| MED10        | -0.036841197 | 0.40182212  | 0.4855772  | 520 | 520 |
| C1orf68      | -0.036867193 | 0.401489827 | 0.48520473 | 520 | 469 |
| ARFRP1       | -0.036867603 | 0.401484595 | 0.48520473 | 520 | 520 |
| TRIM53       | -0.036929068 | 0.400699601 | 0.48430778 | 520 | 124 |
| CROCCL2      | -0.036933345 | 0.400645002 | 0.48427082 | 520 | 520 |
| MLC1         | -0.036966096 | 0.400227139 | 0.48382374 | 520 | 510 |
| ZDHHC5       | -0.036981804 | 0.400026809 | 0.48363956 | 520 | 520 |
| NT5M         | -0.036994902 | 0.399859817 | 0.48352464 | 520 | 519 |
| PTF1A        | -0.036995215 | 0.399855835 | 0.48352464 | 520 | 26  |
| CASP8        | -0.037040699 | 0.399276268 | 0.48290587 | 520 | 520 |
| ZNF84        | -0.037058004 | 0.399055889 | 0.48269724 | 520 | 520 |
| TMEM145      | -0.037067087 | 0.398940253 | 0.48264422 | 520 | 496 |
| KLHDC8B      | -0.037095162 | 0.398582945 | 0.48229876 | 520 | 520 |
| OCIAD2       | -0.03709798  | 0.398547089 | 0.48228431 | 520 | 520 |
| DUSP23       | -0.037120215 | 0.398264263 | 0.48197099 | 520 | 520 |
| CNOT3        | -0.037125231 | 0.398200469 | 0.48192271 | 520 | 520 |

|              |              |             |            |     |     |
|--------------|--------------|-------------|------------|-----|-----|
| LOC100132831 | -0.037160278 | 0.397754964 | 0.48141243 | 520 | 515 |
| OR10A4       | -0.037183025 | 0.397465966 | 0.48109153 | 520 | 37  |
| GPR119       | -0.037188799 | 0.397392624 | 0.48106051 | 520 | 21  |
| ZNF16        | -0.037201615 | 0.397229879 | 0.48089237 | 520 | 520 |
| TMBIM1       | -0.037227676 | 0.396899053 | 0.48052071 | 520 | 520 |
| TNFRSF10A    | -0.037244889 | 0.396680635 | 0.48028512 | 520 | 520 |
| AKR1CL1      | -0.037245136 | 0.396677497 | 0.48028512 | 520 | 164 |
| SMC2         | -0.037271759 | 0.396339818 | 0.47998775 | 520 | 520 |
| SARS         | -0.0372976   | 0.396012228 | 0.47961983 | 520 | 520 |
| CST8         | -0.037300895 | 0.395970469 | 0.47959806 | 520 | 30  |
| RASSF1       | -0.037333408 | 0.395558555 | 0.47915672 | 520 | 520 |
| KCNJ9        | -0.037343635 | 0.395429042 | 0.47902861 | 520 | 297 |
| NEU2         | -0.037415592 | 0.394518498 | 0.47806917 | 520 | 313 |
| PATE1        | -0.037433302 | 0.394294581 | 0.47782655 | 520 | 19  |
| TULP2        | -0.037447569 | 0.394114255 | 0.47769415 | 520 | 313 |
| PKN2         | -0.037468194 | 0.393853673 | 0.47746441 | 520 | 520 |
| TTY6         | -0.037481077 | 0.393690948 | 0.47729583 | 520 | 4   |
| APOA2        | -0.037512631 | 0.39329257  | 0.47684152 | 520 | 149 |
| PSPH         | -0.037552161 | 0.392793829 | 0.47632275 | 520 | 520 |
| TCP10        | -0.037553495 | 0.392777008 | 0.47632275 | 520 | 36  |
| WASF2        | -0.037593093 | 0.392277811 | 0.47584009 | 520 | 520 |
| CNOT8        | -0.037612714 | 0.392030598 | 0.47562605 | 520 | 520 |
| CLCNKA       | -0.037629825 | 0.391815084 | 0.47542179 | 520 | 405 |
| XBP1         | -0.037630864 | 0.391801996 | 0.47542179 | 520 | 520 |
| WBP1         | -0.037635525 | 0.391743305 | 0.47542052 | 520 | 520 |
| GGT3P        | -0.037650724 | 0.391551956 | 0.4752169  | 520 | 519 |
| OR5L1        | -0.037652443 | 0.391530323 | 0.4752169  | 520 | 8   |
| RGL4         | -0.037675336 | 0.391242228 | 0.47492675 | 520 | 512 |
| CACNA1F      | -0.037690897 | 0.391046474 | 0.47480191 | 520 | 499 |
| SNORA6       | -0.037696063 | 0.390981491 | 0.47475315 | 520 | 79  |
| C22orf36     | -0.037711626 | 0.390785801 | 0.47454411 | 520 | 520 |
| TERC         | -0.037716745 | 0.390721439 | 0.47449453 | 520 | 385 |
| TMEM89       | -0.03771893  | 0.390693968 | 0.47448974 | 520 | 138 |
| OR13F1       | -0.037732601 | 0.390522137 | 0.47430962 | 520 | 17  |
| GOSR1        | -0.037769684 | 0.390056262 | 0.47377233 | 520 | 520 |
| FAM47A       | -0.037789464 | 0.389807897 | 0.47352771 | 520 | 90  |
| MTUS1        | -0.037789562 | 0.389806671 | 0.47352771 | 520 | 520 |
| SNORA37      | -0.03779475  | 0.389741545 | 0.47352771 | 520 | 14  |
| C14orf169    | -0.037820051 | 0.389424038 | 0.47320395 | 520 | 520 |
| REG3A        | -0.037823851 | 0.389376356 | 0.47317452 | 520 | 93  |
| TAF7         | -0.037837464 | 0.389205605 | 0.47305255 | 520 | 520 |
| OR10P1       | -0.037853031 | 0.389010392 | 0.47287229 | 520 | 40  |
| C10orf78     | -0.037862587 | 0.388890597 | 0.47278367 | 520 | 520 |
| FAM155B      | -0.037883043 | 0.388634216 | 0.47252896 | 520 | 504 |
| CXorf50B     | -0.037900026 | 0.388421442 | 0.47235571 | 520 | 232 |
| NAA25        | -0.037908354 | 0.388317128 | 0.47228582 | 520 | 520 |



|            |              |             |            |     |     |
|------------|--------------|-------------|------------|-----|-----|
| SNORA44    | -0.037938211 | 0.387943288 | 0.47188806 | 520 | 13  |
| ZFAND1     | -0.037940276 | 0.387917439 | 0.47188509 | 520 | 520 |
| WVOX       | -0.037943293 | 0.387879684 | 0.47186763 | 520 | 520 |
| PRKCG      | -0.037950791 | 0.387785837 | 0.47178192 | 520 | 385 |
| CAST       | -0.037989869 | 0.387296998 | 0.4712725  | 520 | 520 |
| CUEDC2     | -0.038010533 | 0.387038658 | 0.47104343 | 520 | 520 |
| FGF3       | -0.038026339 | 0.386841119 | 0.47083143 | 520 | 111 |
| FAM189B    | -0.038034073 | 0.386744494 | 0.47075793 | 520 | 520 |
| SPATA16    | -0.038054593 | 0.386488166 | 0.47054386 | 520 | 23  |
| HBZ        | -0.038056626 | 0.386462779 | 0.47054386 | 520 | 98  |
| TAF1D      | -0.038056707 | 0.38646177  | 0.47054386 | 520 | 520 |
| IL17REL    | -0.038073686 | 0.386249775 | 0.47042404 | 520 | 409 |
| HPR        | -0.038077535 | 0.386201717 | 0.47039392 | 520 | 178 |
| FLVCR1     | -0.038105312 | 0.385855071 | 0.47005689 | 520 | 520 |
| TBKBP1     | -0.038128763 | 0.38556256  | 0.46978569 | 520 | 520 |
| DMRTC2     | -0.038157655 | 0.385202376 | 0.46940356 | 520 | 103 |
| TMEM33     | -0.038161769 | 0.385151098 | 0.46936944 | 520 | 520 |
| OR10A2     | -0.038187876 | 0.384825832 | 0.4690581  | 520 | 32  |
| IRF2BP1    | -0.038198853 | 0.384689119 | 0.4689198  | 520 | 520 |
| HIST1H2AB  | -0.038223329 | 0.384384388 | 0.46857668 | 520 | 391 |
| HIST2H2AB  | -0.038241352 | 0.384160093 | 0.46840013 | 520 | 369 |
| OR9Q1      | -0.038249475 | 0.384059021 | 0.46837826 | 520 | 50  |
| SPTLC1     | -0.038263954 | 0.383878917 | 0.46818693 | 520 | 520 |
| C21orf2    | -0.038307946 | 0.383332024 | 0.46771796 | 520 | 520 |
| CENPL      | -0.03833755  | 0.382964263 | 0.46732579 | 520 | 520 |
| LENG8      | -0.038341041 | 0.38292091  | 0.46730117 | 520 | 520 |
| DSG1       | -0.038344917 | 0.382872781 | 0.46727072 | 520 | 520 |
| NCAPH      | -0.038347585 | 0.382839648 | 0.46727072 | 520 | 520 |
| OR4F17     | -0.038350815 | 0.382799545 | 0.46726618 | 520 | 3   |
| OTX2       | -0.038356766 | 0.382725666 | 0.46723257 | 520 | 197 |
| ARSG       | -0.038372789 | 0.382526773 | 0.46701803 | 520 | 520 |
| HNF4A      | -0.03839704  | 0.38222588  | 0.4667019  | 520 | 391 |
| CNOT2      | -0.038404248 | 0.382136485 | 0.46665456 | 520 | 520 |
| TTY11      | -0.038404517 | 0.382133147 | 0.46665456 | 520 | 5   |
| FAM71B     | -0.038430152 | 0.381815279 | 0.46637529 | 520 | 37  |
| OR51M1     | -0.038449959 | 0.381569802 | 0.46613865 | 520 | 26  |
| GNAI1      | -0.038466233 | 0.381368178 | 0.4659703  | 520 | 520 |
| TAP2       | -0.038482074 | 0.381171976 | 0.46578703 | 520 | 520 |
| MT1IP      | -0.038496528 | 0.380993007 | 0.46562476 | 520 | 53  |
| NCRNA00203 | -0.038498723 | 0.380965839 | 0.46561978 | 520 | 201 |
| DMRT1      | -0.038579371 | 0.37996826  | 0.46456949 | 520 | 346 |
| LRRC20     | -0.038592971 | 0.379800191 | 0.46439216 | 520 | 520 |
| OR51I1     | -0.03861671  | 0.379506936 | 0.46411802 | 520 | 63  |
| AP3S1      | -0.038648607 | 0.379113125 | 0.46369265 | 520 | 520 |
| IRGC       | -0.038666414 | 0.378893383 | 0.46348011 | 520 | 138 |
| ATP12A     | -0.038684776 | 0.378666876 | 0.46323114 | 520 | 491 |

|               |              |             |            |     |     |
|---------------|--------------|-------------|------------|-----|-----|
| NKAIN1        | -0.038690666 | 0.378594238 | 0.46317038 | 520 | 518 |
| SLC25A6       | -0.038749619 | 0.377867641 | 0.46236562 | 520 | 520 |
| UIMC1         | -0.038796512 | 0.377290315 | 0.46173883 | 520 | 520 |
| ATL2          | -0.038807552 | 0.377154468 | 0.46163304 | 520 | 520 |
| NEK5          | -0.038813506 | 0.37708122  | 0.4615714  | 520 | 405 |
| MCL1          | -0.038843481 | 0.376712576 | 0.46115736 | 520 | 520 |
| RRAGD         | -0.038846514 | 0.376675292 | 0.46115736 | 520 | 520 |
| PRO1768       | -0.038860146 | 0.37650773  | 0.46098135 | 520 | 44  |
| GAPDHS        | -0.038889299 | 0.37614953  | 0.46066473 | 520 | 432 |
| WHSC1         | -0.038907621 | 0.375924525 | 0.46043504 | 520 | 520 |
| OR2T33        | -0.038914583 | 0.375839052 | 0.46035832 | 520 | 63  |
| METTL1        | -0.038925432 | 0.375705872 | 0.46025854 | 520 | 520 |
| IL12A         | -0.038957021 | 0.375318263 | 0.45991598 | 520 | 505 |
| LOC285847     | -0.038978787 | 0.375051329 | 0.45970063 | 520 | 98  |
| MOS           | -0.038992249 | 0.374886303 | 0.45955422 | 520 | 30  |
| UMOD          | -0.038996557 | 0.374833492 | 0.45951742 | 520 | 70  |
| GLTSCR1       | -0.039029478 | 0.374430126 | 0.45910666 | 520 | 520 |
| GSTA5         | -0.039053274 | 0.374138727 | 0.45883307 | 520 | 42  |
| USP17         | -0.039076326 | 0.37385658  | 0.45851494 | 520 | 26  |
| WBSCR27       | -0.039101219 | 0.373552045 | 0.45819718 | 520 | 516 |
| ZCCHC16       | -0.039104567 | 0.373511096 | 0.45817482 | 520 | 40  |
| HIF3A         | -0.03913667  | 0.373118603 | 0.45777691 | 520 | 486 |
| IL15RA        | -0.039141412 | 0.373060658 | 0.45773367 | 520 | 520 |
| VSTM2B        | -0.039147716 | 0.37298362  | 0.45766699 | 520 | 55  |
| SLC45A4       | -0.039265351 | 0.371547914 | 0.45601632 | 520 | 520 |
| LYG2          | -0.039266548 | 0.371533321 | 0.45601632 | 520 | 286 |
| COMMD2        | -0.039270794 | 0.371481571 | 0.45599041 | 520 | 520 |
| KRTAP9-4      | -0.039279719 | 0.371372796 | 0.45591239 | 520 | 135 |
| OLFM1         | -0.039293091 | 0.371209853 | 0.4557401  | 520 | 520 |
| MSH3          | -0.039296414 | 0.371169376 | 0.45571816 | 520 | 520 |
| DEFB123       | -0.039359078 | 0.370406447 | 0.45486453 | 520 | 11  |
| KRT84         | -0.039363564 | 0.37035188  | 0.45482522 | 520 | 466 |
| CKAP2         | -0.039379539 | 0.370157555 | 0.45461426 | 520 | 520 |
| DIAPH1        | -0.039403721 | 0.369863534 | 0.45428083 | 520 | 520 |
| OR5M1         | -0.039404494 | 0.369854133 | 0.45428083 | 520 | 7   |
| DKFZp779M0652 | -0.039417611 | 0.369694702 | 0.45415645 | 520 | 478 |
| PROSC         | -0.039446571 | 0.369342879 | 0.45375189 | 520 | 520 |
| AGBL2         | -0.039474035 | 0.369009411 | 0.45339746 | 520 | 518 |
| SLC2A1        | -0.039497372 | 0.368726201 | 0.45307709 | 520 | 520 |
| WARS2         | -0.039515928 | 0.3685011   | 0.45282809 | 520 | 520 |
| HPD           | -0.039586262 | 0.367648699 | 0.4518357  | 520 | 463 |
| SLC9A9        | -0.039608938 | 0.367374143 | 0.45155332 | 520 | 520 |
| CD46          | -0.039630258 | 0.367116116 | 0.45129119 | 520 | 520 |
| LYSMD2        | -0.039642536 | 0.366967564 | 0.45113608 | 520 | 520 |
| SMPDL3B       | -0.039645401 | 0.366932918 | 0.45112099 | 520 | 520 |
| HS6ST3        | -0.039661448 | 0.366738837 | 0.45093737 | 520 | 367 |

|            |              |             |            |     |     |
|------------|--------------|-------------|------------|-----|-----|
| ZNF431     | -0.03971975  | 0.366034273 | 0.45015385 | 520 | 520 |
| KRTAP20-2  | -0.039728925 | 0.365923466 | 0.45007202 | 520 | 7   |
| ZNF519     | -0.039751272 | 0.365653676 | 0.44979654 | 520 | 518 |
| XPO7       | -0.039758621 | 0.365564985 | 0.44974084 | 520 | 520 |
| SYNCRIP    | -0.039827252 | 0.364737324 | 0.44885953 | 520 | 520 |
| TATDN1     | -0.039876224 | 0.364147461 | 0.44816097 | 520 | 520 |
| SESN1      | -0.039884972 | 0.364042159 | 0.44805873 | 520 | 520 |
| SVIP       | -0.039895494 | 0.363915521 | 0.4479302  | 520 | 520 |
| CCDC114    | -0.039913554 | 0.363698232 | 0.44771741 | 520 | 513 |
| KRT85      | -0.03991371  | 0.363696351 | 0.44771741 | 520 | 339 |
| LCE2D      | -0.039923843 | 0.363574472 | 0.44761971 | 520 | 314 |
| CD8B       | -0.039942701 | 0.363347706 | 0.44736784 | 520 | 516 |
| MGST1      | -0.039989509 | 0.362785243 | 0.44670259 | 520 | 520 |
| AMDHD2     | -0.040013095 | 0.362502017 | 0.44640837 | 520 | 520 |
| OR4D6      | -0.040062431 | 0.361910055 | 0.44578829 | 520 | 18  |
| FIS1       | -0.040067777 | 0.36184594  | 0.44573655 | 520 | 520 |
| ACOT12     | -0.040077312 | 0.361731615 | 0.44562294 | 520 | 82  |
| WDFY2      | -0.040080623 | 0.361691923 | 0.44560127 | 520 | 520 |
| HERC5      | -0.040081706 | 0.361678943 | 0.44560127 | 520 | 520 |
| OR4K2      | -0.040090164 | 0.361577558 | 0.44551481 | 520 | 25  |
| SNORD94    | -0.040092012 | 0.361555411 | 0.44551475 | 520 | 94  |
| GRAMD2     | -0.040092647 | 0.361547795 | 0.44551475 | 520 | 520 |
| WDR66      | -0.040123006 | 0.361184053 | 0.44519318 | 520 | 520 |
| KSR1       | -0.04015152  | 0.36084263  | 0.44490833 | 520 | 520 |
| CCDC109A   | -0.040242472 | 0.359754916 | 0.44367573 | 520 | 520 |
| MGC3771    | -0.040254581 | 0.359610254 | 0.44352445 | 520 | 510 |
| LOC284551  | -0.040317334 | 0.358861162 | 0.44270887 | 520 | 248 |
| GUCA2A     | -0.040321078 | 0.3588165   | 0.44268086 | 520 | 88  |
| TNK2       | -0.040335275 | 0.35864719  | 0.44252613 | 520 | 520 |
| RIMKLA     | -0.040369392 | 0.358240493 | 0.44207841 | 520 | 499 |
| NCRNA00159 | -0.040371863 | 0.35821105  | 0.44206914 | 520 | 32  |
| PMCHL1     | -0.040372203 | 0.358206992 | 0.44206914 | 520 | 40  |
| NIPA2      | -0.040421134 | 0.357624243 | 0.44150709 | 520 | 520 |
| ADHFE1     | -0.040422512 | 0.357607848 | 0.44150709 | 520 | 518 |
| NLRP13     | -0.04043526  | 0.357456119 | 0.4413806  | 520 | 58  |
| DGCR6L     | -0.040436665 | 0.357439409 | 0.4413806  | 520 | 520 |
| SNORA2A    | -0.040447133 | 0.35731485  | 0.44126021 | 520 | 12  |
| FGF20      | -0.040458058 | 0.357184897 | 0.44115376 | 520 | 90  |
| LOC729121  | -0.040469075 | 0.357053864 | 0.44101894 | 520 | 13  |
| PNPLA2     | -0.040482912 | 0.356889348 | 0.44084274 | 520 | 520 |
| RBCK1      | -0.040484816 | 0.356866719 | 0.44084179 | 520 | 520 |
| RASEF      | -0.040484867 | 0.356866109 | 0.44084179 | 520 | 511 |
| FCRL5      | -0.040494373 | 0.356753117 | 0.44075546 | 520 | 501 |
| RPN1       | -0.040497816 | 0.356712195 | 0.44073191 | 520 | 520 |
| ITIH5L     | -0.040499497 | 0.356692219 | 0.44073191 | 520 | 480 |
| MRGPRX3    | -0.04052438  | 0.35639658  | 0.44042291 | 520 | 483 |

|              |              |             |            |     |     |
|--------------|--------------|-------------|------------|-----|-----|
| SCGB1D1      | -0.040546325 | 0.356135983 | 0.44012785 | 520 | 13  |
| KRT26        | -0.040550122 | 0.356090911 | 0.44009912 | 520 | 9   |
| LOC157381    | -0.040553777 | 0.356047524 | 0.44007247 | 520 | 504 |
| EGOT         | -0.040555705 | 0.356024632 | 0.44007115 | 520 | 472 |
| UBA3         | -0.040560669 | 0.355965715 | 0.4400253  | 520 | 520 |
| CREG1        | -0.040601029 | 0.355486899 | 0.4394873  | 520 | 520 |
| LOC91450     | -0.040602457 | 0.355469966 | 0.4394873  | 520 | 517 |
| BLVRA        | -0.040621304 | 0.355246507 | 0.4392709  | 520 | 520 |
| TFAP2B       | -0.040631068 | 0.355130781 | 0.43915473 | 520 | 262 |
| C15orf60     | -0.040641459 | 0.355007655 | 0.43905323 | 520 | 146 |
| ZFPL1        | -0.040654989 | 0.354847362 | 0.438885   | 520 | 520 |
| CTSE         | -0.040689939 | 0.354433516 | 0.43842693 | 520 | 431 |
| RTP2         | -0.040710459 | 0.354190687 | 0.4382072  | 520 | 119 |
| C18orf32     | -0.040738215 | 0.353862391 | 0.43788164 | 520 | 520 |
| C15orf50     | -0.040741925 | 0.353818522 | 0.43785422 | 520 | 90  |
| RALGPS2      | -0.040755213 | 0.353661424 | 0.43768667 | 520 | 520 |
| CBFA2T3      | -0.040757136 | 0.353638693 | 0.4376854  | 520 | 520 |
| C3orf77      | -0.040806383 | 0.353056902 | 0.43709949 | 520 | 41  |
| APOA5        | -0.040825769 | 0.352828045 | 0.43684298 | 520 | 167 |
| LOC284661    | -0.040851987 | 0.352518692 | 0.43648676 | 520 | 52  |
| ANTXRL       | -0.040856557 | 0.352464789 | 0.43646028 | 520 | 65  |
| LOC100271832 | -0.040860812 | 0.352414597 | 0.43643827 | 520 | 114 |
| PNPLA7       | -0.040895309 | 0.352007887 | 0.43598815 | 520 | 520 |
| KLF8         | -0.04091972  | 0.35172027  | 0.43565867 | 520 | 520 |
| B3GNTL1      | -0.040950992 | 0.351352029 | 0.43522929 | 520 | 520 |
| LOC100133545 | -0.040954968 | 0.35130522  | 0.43519804 | 520 | 396 |
| AMDHD1       | -0.040979026 | 0.351022113 | 0.43490076 | 520 | 506 |
| LOC100130148 | -0.04100297  | 0.3507405   | 0.43460526 | 520 | 85  |
| ZNF732       | -0.041038651 | 0.350321101 | 0.43416562 | 520 | 447 |
| C9orf96      | -0.041042699 | 0.350273536 | 0.43413336 | 520 | 500 |
| HIST1H2BH    | -0.041061874 | 0.3500483   | 0.43388087 | 520 | 517 |
| WFDC8        | -0.041070419 | 0.349947957 | 0.43378316 | 520 | 20  |
| KIF18A       | -0.041096159 | 0.349645807 | 0.43346192 | 520 | 520 |
| ZNF425       | -0.041096255 | 0.349644676 | 0.43346192 | 520 | 520 |
| PRR24        | -0.041118572 | 0.349382845 | 0.43318918 | 520 | 520 |
| PIM1         | -0.041124307 | 0.349315578 | 0.43313241 | 520 | 520 |
| UBE2R2       | -0.041159412 | 0.348903998 | 0.4327019  | 520 | 520 |
| SLC16A13     | -0.041168143 | 0.348801685 | 0.43262348 | 520 | 520 |
| TSLP         | -0.041194812 | 0.348489287 | 0.43229394 | 520 | 520 |
| OR11H4       | -0.041198288 | 0.348448577 | 0.43227003 | 520 | 93  |
| CLCN1        | -0.04119881  | 0.34844247  | 0.43227003 | 520 | 509 |
| NFU1         | -0.041217689 | 0.348221442 | 0.43205846 | 520 | 520 |
| CLDND2       | -0.041262124 | 0.34770157  | 0.43147606 | 520 | 440 |
| ACVR2A       | -0.041276686 | 0.347531314 | 0.43129132 | 520 | 520 |
| PLIN3        | -0.041290222 | 0.347373091 | 0.4311215  | 520 | 520 |
| PRSS50       | -0.041291733 | 0.347355428 | 0.4311215  | 520 | 373 |

|            |              |             |            |     |     |
|------------|--------------|-------------|------------|-----|-----|
| SNAR-A3    | -0.041316751 | 0.347063128 | 0.43084288 | 520 | 4   |
| TMEM208    | -0.04136512  | 0.346498455 | 0.43023268 | 520 | 520 |
| LOC348926  | -0.041371645 | 0.346422323 | 0.43017981 | 520 | 520 |
| KPNA7      | -0.041390076 | 0.346207334 | 0.42993932 | 520 | 512 |
| SMR3A      | -0.041416547 | 0.345898719 | 0.42960898 | 520 | 65  |
| OR7E37P    | -0.041436677 | 0.345664147 | 0.42937053 | 520 | 164 |
| DGCR9      | -0.041442454 | 0.345596838 | 0.42931337 | 520 | 510 |
| HPS6       | -0.041444525 | 0.345572715 | 0.42930985 | 520 | 520 |
| LOC440896  | -0.041444565 | 0.345572253 | 0.42930985 | 520 | 334 |
| BSCL2      | -0.041490711 | 0.345034983 | 0.42880033 | 520 | 520 |
| OR5B17     | -0.041507338 | 0.344841536 | 0.42858634 | 520 | 6   |
| CETN1      | -0.041552517 | 0.344316231 | 0.42801261 | 520 | 30  |
| DVWA       | -0.041560326 | 0.344225476 | 0.42792617 | 520 | 478 |
| OGFR       | -0.04159431  | 0.34383074  | 0.42748816 | 520 | 520 |
| C1orf51    | -0.041648618 | 0.343200531 | 0.42678357 | 520 | 520 |
| CD8A       | -0.04172202  | 0.342349925 | 0.42580458 | 520 | 520 |
| SNORA34    | -0.041760409 | 0.341905593 | 0.42533064 | 520 | 51  |
| OCEL1      | -0.041779039 | 0.341690088 | 0.42511501 | 520 | 520 |
| TBPL1      | -0.041781139 | 0.34166581  | 0.42511103 | 520 | 520 |
| ZBED5      | -0.041827175 | 0.341133691 | 0.42455374 | 520 | 520 |
| RPS6KA1    | -0.041837649 | 0.341012693 | 0.42442935 | 520 | 520 |
| TAAR1      | -0.041893114 | 0.340372435 | 0.42373495 | 520 | 69  |
| C19orf54   | -0.04192355  | 0.340021425 | 0.42335239 | 520 | 520 |
| ADAM6      | -0.042009046 | 0.339036667 | 0.42225666 | 520 | 520 |
| ZNF180     | -0.042025473 | 0.338847663 | 0.42207341 | 520 | 520 |
| PIGQ       | -0.042049309 | 0.338573533 | 0.42181012 | 520 | 520 |
| C4orf40    | -0.04206998  | 0.338335927 | 0.42154014 | 520 | 120 |
| KRT71      | -0.042106065 | 0.337921389 | 0.42110172 | 520 | 386 |
| BARHL1     | -0.042129358 | 0.337653976 | 0.42079449 | 520 | 121 |
| DDX11L2    | -0.042151402 | 0.33740103  | 0.42053124 | 520 | 500 |
| SNRPB2     | -0.042155386 | 0.337355328 | 0.42052626 | 520 | 520 |
| PRB3       | -0.042184243 | 0.337024417 | 0.42016572 | 520 | 409 |
| COX15      | -0.042198062 | 0.336866016 | 0.41999421 | 520 | 520 |
| KRTAP10-12 | -0.042199765 | 0.336846502 | 0.41999421 | 520 | 47  |
| RGR        | -0.042212944 | 0.336695497 | 0.41983353 | 520 | 62  |
| ACCN5      | -0.042221862 | 0.336593337 | 0.4197321  | 520 | 76  |
| KRT12      | -0.042239052 | 0.336396468 | 0.41951255 | 520 | 211 |
| EFCAB10    | -0.04233816  | 0.335262904 | 0.41822824 | 520 | 501 |
| ZG16       | -0.042338168 | 0.335262819 | 0.41822824 | 520 | 152 |
| C10orf35   | -0.042358053 | 0.335035673 | 0.41804822 | 520 | 519 |
| SNORA71A   | -0.042371663 | 0.334880267 | 0.41788017 | 520 | 46  |
| TTC29      | -0.042380502 | 0.334779363 | 0.41778011 | 520 | 215 |
| SH2D6      | -0.042385843 | 0.334718394 | 0.41772988 | 520 | 289 |
| RND3       | -0.042404336 | 0.334507378 | 0.41754406 | 520 | 520 |
| CSDA       | -0.042463744 | 0.333830049 | 0.41675019 | 520 | 520 |
| C1orf185   | -0.042533972 | 0.333030497 | 0.41588078 | 520 | 14  |

|            |              |             |            |     |     |
|------------|--------------|-------------|------------|-----|-----|
| STRA8      | -0.042551114 | 0.332835522 | 0.41566304 | 520 | 179 |
| FOXO4      | -0.042569461 | 0.332626912 | 0.41542825 | 520 | 520 |
| PRR23B     | -0.042573163 | 0.332584839 | 0.41540143 | 520 | 70  |
| RPAP2      | -0.042575718 | 0.332555796 | 0.41539089 | 520 | 520 |
| TMEM19     | -0.042595039 | 0.332336247 | 0.41516809 | 520 | 520 |
| FAM19A4    | -0.042599323 | 0.332287569 | 0.415133   | 520 | 173 |
| SLC22A10   | -0.042668951 | 0.331497211 | 0.41419691 | 520 | 76  |
| CABLES2    | -0.042677206 | 0.331403586 | 0.41410559 | 520 | 520 |
| KRTAP4-3   | -0.042719998 | 0.33091853  | 0.41368322 | 520 | 7   |
| OR2A2      | -0.042723252 | 0.330881667 | 0.41368322 | 520 | 50  |
| ARMC8      | -0.042728071 | 0.330827072 | 0.41366719 | 520 | 520 |
| UBD        | -0.042772779 | 0.330320879 | 0.4131111  | 520 | 520 |
| IMP4       | -0.042802703 | 0.329982358 | 0.41271333 | 520 | 520 |
| FADS6      | -0.042859782 | 0.329337252 | 0.41198315 | 520 | 446 |
| PRRT3      | -0.042883127 | 0.329073645 | 0.41167893 | 520 | 520 |
| MYADML     | -0.042886142 | 0.329039609 | 0.41166189 | 520 | 164 |
| C2orf73    | -0.042905464 | 0.328821542 | 0.41141459 | 520 | 228 |
| TMEM185A   | -0.042920542 | 0.328651449 | 0.41122729 | 520 | 520 |
| VAMP1      | -0.042960764 | 0.328197961 | 0.41076182 | 520 | 520 |
| UGT2B11    | -0.042974805 | 0.328039753 | 0.4105893  | 520 | 63  |
| GMPPB      | -0.042980637 | 0.327974048 | 0.41053254 | 520 | 520 |
| SNORA69    | -0.042994095 | 0.327822474 | 0.41036829 | 520 | 4   |
| PSMC2      | -0.043010136 | 0.327641867 | 0.4102186  | 520 | 520 |
| ARPC4      | -0.043040348 | 0.327301877 | 0.40984382 | 520 | 520 |
| 3-Mar      | -0.043111778 | 0.32649896  | 0.4089654  | 520 | 520 |
| RFFL       | -0.043120617 | 0.326399696 | 0.40889187 | 520 | 520 |
| SNW1       | -0.043143799 | 0.326139435 | 0.4086166  | 520 | 520 |
| DAXX       | -0.043222792 | 0.325253619 | 0.40757092 | 520 | 520 |
| NFS1       | -0.043287984 | 0.324523754 | 0.40669341 | 520 | 520 |
| LEP        | -0.043336646 | 0.323979635 | 0.40608724 | 520 | 407 |
| C16orf81   | -0.043336992 | 0.323975771 | 0.40608724 | 520 | 189 |
| LRP8       | -0.043358708 | 0.323733147 | 0.40585396 | 520 | 520 |
| TAS2R16    | -0.043386887 | 0.323418489 | 0.4054847  | 520 | 12  |
| PDE12      | -0.043387051 | 0.323416652 | 0.4054847  | 520 | 520 |
| TRIM13     | -0.04340416  | 0.323225707 | 0.4053186  | 520 | 520 |
| PDK2       | -0.04341497  | 0.323105103 | 0.40521777 | 520 | 520 |
| CLGN       | -0.043424419 | 0.322999693 | 0.40511077 | 520 | 484 |
| CCAR1      | -0.04342844  | 0.322954849 | 0.40507972 | 520 | 520 |
| RBBP8      | -0.043440214 | 0.322823561 | 0.40494024 | 520 | 520 |
| ASB13      | -0.04344239  | 0.322799293 | 0.40493499 | 520 | 520 |
| TPRX1      | -0.043449272 | 0.322722578 | 0.40489872 | 520 | 69  |
| ZNF195     | -0.043450723 | 0.3227064   | 0.40489872 | 520 | 520 |
| PPBPL2     | -0.043480361 | 0.322376139 | 0.40455517 | 520 | 35  |
| NCRNA00032 | -0.043521577 | 0.321917227 | 0.40402956 | 520 | 160 |
| ATAD5      | -0.043529507 | 0.321828987 | 0.40394396 | 520 | 520 |
| C14orf68   | -0.043538898 | 0.321724499 | 0.40383795 | 520 | 349 |

|           |              |             |            |     |     |
|-----------|--------------|-------------|------------|-----|-----|
| LPAR5     | -0.043541637 | 0.321694033 | 0.40382484 | 520 | 520 |
| FAT2      | -0.043549767 | 0.321603606 | 0.40373647 | 520 | 520 |
| ZCCHC6    | -0.043566211 | 0.321420741 | 0.40355715 | 520 | 520 |
| SPATA12   | -0.043601602 | 0.321027425 | 0.40318885 | 520 | 505 |
| ZNF642    | -0.043618386 | 0.320841008 | 0.40297982 | 520 | 520 |
| KRCC1     | -0.043643195 | 0.320565581 | 0.40268405 | 520 | 520 |
| HIST1H1A  | -0.043652447 | 0.320462905 | 0.40260523 | 520 | 174 |
| HIST1H2AH | -0.043680911 | 0.320147162 | 0.40223362 | 520 | 440 |
| SPATA2L   | -0.043712629 | 0.319795566 | 0.40184195 | 520 | 520 |
| LY6G6F    | -0.043717142 | 0.319745549 | 0.40180414 | 520 | 169 |
| LCORL     | -0.043727011 | 0.319636211 | 0.40169178 | 520 | 520 |
| ZNRF4     | -0.043775118 | 0.319103597 | 0.40107243 | 520 | 65  |
| RNASEH2B  | -0.043775361 | 0.319100906 | 0.40107243 | 520 | 520 |
| SNORD10   | -0.043827623 | 0.318522931 | 0.40041748 | 520 | 217 |
| KLRAQ1    | -0.043842115 | 0.318362786 | 0.40031599 | 520 | 520 |
| ANKRD24   | -0.043847513 | 0.31830315  | 0.40026596 | 520 | 515 |
| ACAP1     | -0.043891336 | 0.317819255 | 0.39975719 | 520 | 520 |
| ZNF485    | -0.043898188 | 0.317743645 | 0.39968702 | 520 | 520 |
| ANXA2     | -0.043930962 | 0.317382126 | 0.39930699 | 520 | 520 |
| TRMT6     | -0.04394264  | 0.317253372 | 0.39916991 | 520 | 520 |
| CTXN1     | -0.043949022 | 0.317183019 | 0.3991063  | 520 | 520 |
| IMMT      | -0.043955558 | 0.317110989 | 0.39906547 | 520 | 520 |
| TBC1D3P2  | -0.044018055 | 0.316422729 | 0.39832363 | 520 | 93  |
| PRPF4     | -0.044057224 | 0.315991873 | 0.39780609 | 520 | 520 |
| PPP2R2C   | -0.044069124 | 0.315861057 | 0.39769106 | 520 | 520 |
| TBX10     | -0.044073372 | 0.31581436  | 0.3976571  | 520 | 200 |
| USP6      | -0.044076348 | 0.315781656 | 0.39764075 | 520 | 519 |
| TMPRSS5   | -0.04408408  | 0.315696685 | 0.39755858 | 520 | 484 |
| OR5AU1    | -0.044125958 | 0.315236735 | 0.39707856 | 520 | 60  |
| DLK2      | -0.044145414 | 0.315023206 | 0.39683438 | 520 | 520 |
| CXorf22   | -0.044167775 | 0.314777903 | 0.39657492 | 520 | 216 |
| SLC20A2   | -0.044179945 | 0.314644449 | 0.39643156 | 520 | 520 |
| C20orf165 | -0.044198817 | 0.314437576 | 0.39619567 | 520 | 494 |
| LRIT1     | -0.044221937 | 0.314184256 | 0.39590122 | 520 | 33  |
| PPIL6     | -0.044224604 | 0.314155046 | 0.39588915 | 520 | 519 |
| SNAPC5    | -0.044253516 | 0.313838474 | 0.39551494 | 520 | 520 |
| C2CD4A    | -0.044257312 | 0.313796928 | 0.3954873  | 520 | 520 |
| OR8H2     | -0.044271488 | 0.313641797 | 0.39531649 | 520 | 5   |
| ACSM2A    | -0.044275381 | 0.313599204 | 0.39528751 | 520 | 152 |
| MAPK11    | -0.044275845 | 0.313594123 | 0.39528751 | 520 | 520 |
| GBP2      | -0.044282165 | 0.313524994 | 0.39524339 | 520 | 520 |
| SNORD15A  | -0.044288042 | 0.313460713 | 0.39518706 | 520 | 41  |
| NUP107    | -0.04429993  | 0.313330706 | 0.39504786 | 520 | 520 |
| IFNW1     | -0.044317615 | 0.313137371 | 0.39482879 | 520 | 100 |
| LSM10     | -0.044339631 | 0.312896805 | 0.39455389 | 520 | 520 |
| KAT5      | -0.044346974 | 0.312816598 | 0.39449833 | 520 | 520 |

|            |              |             |            |     |     |
|------------|--------------|-------------|------------|-----|-----|
| CLPS       | -0.044357356 | 0.312703207 | 0.39438    | 520 | 61  |
| RALA       | -0.044378628 | 0.312470982 | 0.39411177 | 520 | 520 |
| OR8B8      | -0.044387034 | 0.312379245 | 0.39402071 | 520 | 5   |
| NPNT       | -0.044398981 | 0.312248891 | 0.39388093 | 520 | 520 |
| MAPKBP1    | -0.044434264 | 0.311864128 | 0.3934448  | 520 | 520 |
| ZNF799     | -0.044437317 | 0.311830846 | 0.3934448  | 520 | 520 |
| PI4KB      | -0.044443496 | 0.311763501 | 0.39341631 | 520 | 520 |
| KRT79      | -0.044499095 | 0.31115796  | 0.39272591 | 520 | 506 |
| OR13D1     | -0.044504851 | 0.31109532  | 0.39267143 | 520 | 26  |
| ACAP2      | -0.044510541 | 0.311033394 | 0.39261784 | 520 | 520 |
| APOL4      | -0.044510872 | 0.311029793 | 0.39261784 | 520 | 520 |
| KRTAP12-3  | -0.044556936 | 0.310528823 | 0.39205455 | 520 | 15  |
| SNORA39    | -0.044566797 | 0.310421644 | 0.39194377 | 520 | 488 |
| GPR25      | -0.044596427 | 0.310099753 | 0.39156186 | 520 | 411 |
| NR4A2      | -0.044634786 | 0.30968336  | 0.39110956 | 520 | 520 |
| WNT10A     | -0.044717383 | 0.308788012 | 0.3901743  | 520 | 520 |
| KDM4C      | -0.044729018 | 0.308662024 | 0.39008844 | 520 | 520 |
| CDC42SE2   | -0.044797775 | 0.307918202 | 0.38927038 | 520 | 520 |
| CARTPT     | -0.044806392 | 0.30782507  | 0.38917705 | 520 | 57  |
| ZMYND8     | -0.044833477 | 0.307532442 | 0.38888023 | 520 | 520 |
| CPN1       | -0.044835014 | 0.307515843 | 0.38888023 | 520 | 171 |
| ZNF740     | -0.044892129 | 0.306899391 | 0.3881771  | 520 | 520 |
| NCRNA00110 | -0.044972504 | 0.306033285 | 0.38715447 | 520 | 205 |
| NIPA1      | -0.044980282 | 0.305949556 | 0.38707283 | 520 | 520 |
| HMGB4      | -0.044999032 | 0.305747782 | 0.38686611 | 520 | 25  |
| ZNF512B    | -0.045003781 | 0.305696688 | 0.38682573 | 520 | 520 |
| PHF19      | -0.045017835 | 0.305545518 | 0.38668297 | 520 | 520 |
| HIST1H4F   | -0.045039879 | 0.305308505 | 0.38643153 | 520 | 106 |
| LIN28A     | -0.045053905 | 0.305157772 | 0.38626499 | 520 | 170 |
| CRYGB      | -0.045063218 | 0.305057711 | 0.38618682 | 520 | 21  |
| EFCAB3     | -0.045074952 | 0.304931664 | 0.38605149 | 520 | 227 |
| C1orf228   | -0.045109717 | 0.304558434 | 0.38565161 | 520 | 506 |
| CYB561D1   | -0.045138508 | 0.304249565 | 0.3852847  | 520 | 520 |
| FIGF       | -0.045158716 | 0.3040329   | 0.38503451 | 520 | 479 |
| YIF1B      | -0.045185178 | 0.303749338 | 0.38472372 | 520 | 520 |
| PHYHIP     | -0.045274448 | 0.30279403  | 0.38356193 | 520 | 520 |
| HNRNPH2    | -0.045330882 | 0.302191134 | 0.3829185  | 520 | 520 |
| NKX2-8     | -0.045342446 | 0.302067692 | 0.38278613 | 520 | 500 |
| KCNJ11     | -0.045344516 | 0.302045599 | 0.38278219 | 520 | 517 |
| CSAG2      | -0.045345981 | 0.302029963 | 0.38278219 | 520 | 385 |
| NUP43      | -0.045355665 | 0.30192663  | 0.38267953 | 520 | 520 |
| REG4       | -0.045368652 | 0.301788076 | 0.38255201 | 520 | 310 |
| DTX3L      | -0.045421229 | 0.301227609 | 0.38193759 | 520 | 520 |
| DDX1       | -0.045436452 | 0.301065451 | 0.38175599 | 520 | 520 |
| RAB5A      | -0.045450574 | 0.30091509  | 0.38161333 | 520 | 520 |
| REG1P      | -0.045451222 | 0.300908184 | 0.38161333 | 520 | 21  |



|           |              |             |            |     |     |
|-----------|--------------|-------------|------------|-----|-----|
| RAD51L1   | -0.045485447 | 0.300543971 | 0.38123859 | 520 | 520 |
| PHIP      | -0.045534034 | 0.300027425 | 0.3807031  | 520 | 520 |
| FTCD      | -0.045535239 | 0.300014626 | 0.3807031  | 520 | 384 |
| SPAG7     | -0.045549728 | 0.299860705 | 0.38053945 | 520 | 520 |
| ZNF76     | -0.045584196 | 0.299494761 | 0.38012289 | 520 | 520 |
| OR2F2     | -0.045600827 | 0.2993183   | 0.37994675 | 520 | 27  |
| SLC25A44  | -0.045602018 | 0.29930566  | 0.37994675 | 520 | 520 |
| LOC286359 | -0.045624229 | 0.299070096 | 0.37972731 | 520 | 30  |
| ALDOB     | -0.045644422 | 0.29885605  | 0.37947943 | 520 | 408 |
| LOC642597 | -0.045677965 | 0.298500716 | 0.3791715  | 520 | 71  |
| AICDA     | -0.045696662 | 0.298302769 | 0.37901742 | 520 | 355 |
| SPAG11B   | -0.045711932 | 0.298141173 | 0.37888187 | 520 | 57  |
| MBLAC2    | -0.045716137 | 0.298096682 | 0.37884921 | 520 | 520 |
| NAA16     | -0.045747475 | 0.297765262 | 0.37847571 | 520 | 520 |
| C16orf55  | -0.045761175 | 0.29762045  | 0.3783155  | 520 | 520 |
| SEMG2     | -0.045769708 | 0.297530277 | 0.37822472 | 520 | 215 |
| FAM74A1   | -0.045771034 | 0.297516271 | 0.37822472 | 520 | 36  |
| DBX1      | -0.045779041 | 0.297431676 | 0.37814706 | 520 | 94  |
| GHRHR     | -0.045780517 | 0.297416078 | 0.37814706 | 520 | 41  |
| BFSP2     | -0.045791827 | 0.297296622 | 0.37802302 | 520 | 406 |
| OR7A10    | -0.045795385 | 0.297259052 | 0.37799909 | 520 | 7   |
| USP29     | -0.045802571 | 0.297183177 | 0.37795027 | 520 | 44  |
| C10orf41  | -0.045807662 | 0.297129428 | 0.37790575 | 520 | 520 |
| C16orf90  | -0.045852242 | 0.296659053 | 0.37735511 | 520 | 171 |
| ZNF638    | -0.045852638 | 0.296654877 | 0.37735511 | 520 | 520 |
| CTSL3     | -0.045863292 | 0.296542531 | 0.37725449 | 520 | 39  |
| SNX1      | -0.045896349 | 0.296194151 | 0.37688262 | 520 | 520 |
| GRIN1     | -0.045968258 | 0.295437264 | 0.37596699 | 520 | 510 |
| NCAPG2    | -0.045968736 | 0.295432233 | 0.37596699 | 520 | 520 |
| ARL17B    | -0.045972333 | 0.295394411 | 0.37595991 | 520 | 433 |
| HSP90AB4P | -0.045977363 | 0.295341523 | 0.37591633 | 520 | 390 |
| C19orf77  | -0.045977818 | 0.295336732 | 0.37591633 | 520 | 480 |
| NR2E1     | -0.045979042 | 0.295323867 | 0.37591633 | 520 | 450 |
| BATF2     | -0.045979229 | 0.295321906 | 0.37591633 | 520 | 520 |
| RGS21     | -0.046041533 | 0.294667322 | 0.3751766  | 520 | 20  |
| SLC28A2   | -0.046050105 | 0.294577339 | 0.37510941 | 520 | 123 |
| SNORA52   | -0.046055375 | 0.294522036 | 0.37506267 | 520 | 54  |
| TMEM190   | -0.046072601 | 0.294341287 | 0.37487985 | 520 | 359 |
| OR51A7    | -0.046078389 | 0.29428057  | 0.37482619 | 520 | 13  |
| THG1L     | -0.046091672 | 0.29414126  | 0.37469609 | 520 | 520 |
| PEMT      | -0.046108156 | 0.293968447 | 0.37449961 | 520 | 520 |
| C6orf94   | -0.046155629 | 0.293471135 | 0.37391331 | 520 | 225 |
| CSN3      | -0.046160632 | 0.293418753 | 0.37387019 | 520 | 133 |
| MS4A12    | -0.04619638  | 0.293044679 | 0.37346435 | 520 | 26  |
| LAMB2L    | -0.046245742 | 0.292528683 | 0.37287745 | 520 | 519 |
| CALCOCO2  | -0.046267714 | 0.29229919  | 0.37260848 | 520 | 520 |

|              |              |             |            |     |     |
|--------------|--------------|-------------|------------|-----|-----|
| CTPS         | -0.046277049 | 0.292201729 | 0.37250779 | 520 | 520 |
| C2CD2        | -0.046323911 | 0.291712786 | 0.37195502 | 520 | 520 |
| LHX3         | -0.046362951 | 0.291305875 | 0.37150665 | 520 | 391 |
| RABGAP1      | -0.046363027 | 0.291305076 | 0.37150665 | 520 | 520 |
| CDC25B       | -0.046377002 | 0.291159518 | 0.37137241 | 520 | 520 |
| DLEU2        | -0.046387914 | 0.291045881 | 0.371269   | 520 | 520 |
| CRLF3        | -0.046396491 | 0.290956596 | 0.37117859 | 520 | 520 |
| DKFZP434K028 | -0.046397065 | 0.290950622 | 0.37117859 | 520 | 46  |
| SMC6         | -0.046408291 | 0.290833776 | 0.37106886 | 520 | 520 |
| HNRNPH3      | -0.046425096 | 0.290658925 | 0.37089271 | 520 | 520 |
| HIST1H2AD    | -0.046436719 | 0.290538034 | 0.37076191 | 520 | 419 |
| QRFRP        | -0.046437086 | 0.290534213 | 0.37076191 | 520 | 352 |
| NUP54        | -0.046442471 | 0.29047822  | 0.3707325  | 520 | 520 |
| PATL2        | -0.046442869 | 0.290474078 | 0.3707325  | 520 | 514 |
| NLRC5        | -0.046476499 | 0.29012453  | 0.37035142 | 520 | 520 |
| CYP26A1      | -0.046517248 | 0.289701371 | 0.36988149 | 520 | 432 |
| CENPE        | -0.046518369 | 0.28968974  | 0.36988149 | 520 | 520 |
| OR10A5       | -0.046544649 | 0.289417053 | 0.36958869 | 520 | 26  |
| SNORA61      | -0.04655875  | 0.289270812 | 0.36942534 | 520 | 96  |
| C1orf98      | -0.046579896 | 0.28905161  | 0.36916878 | 520 | 98  |
| KLRC1        | -0.046581664 | 0.289033286 | 0.36916876 | 520 | 509 |
| IL7          | -0.046597558 | 0.288868596 | 0.36900515 | 520 | 519 |
| LOC653544    | -0.046599717 | 0.288846228 | 0.36899996 | 520 | 48  |
| FEZF2        | -0.046652968 | 0.288294961 | 0.36834239 | 520 | 60  |
| C1orf87      | -0.046657986 | 0.288243057 | 0.36829941 | 520 | 107 |
| C2orf50      | -0.046670816 | 0.288110356 | 0.36815318 | 520 | 412 |
| TMEM30C      | -0.046675784 | 0.288058986 | 0.36813262 | 520 | 11  |
| TBC1D13      | -0.046703835 | 0.287769031 | 0.36781026 | 520 | 520 |
| TMBIM4       | -0.046756491 | 0.287225286 | 0.36720839 | 520 | 520 |
| C1orf74      | -0.046790849 | 0.286870868 | 0.36680179 | 520 | 520 |
| LIPM         | -0.046805237 | 0.286722535 | 0.36665863 | 520 | 311 |
| SLC22A25     | -0.046806605 | 0.286708441 | 0.36665863 | 520 | 249 |
| FAM22A       | -0.046822429 | 0.286545364 | 0.36647854 | 520 | 517 |
| PSMB11       | -0.046831735 | 0.286449493 | 0.36637917 | 520 | 125 |
| CCDC23       | -0.046853155 | 0.286228903 | 0.36612025 | 520 | 520 |
| C1orf220     | -0.046881325 | 0.285938973 | 0.36588866 | 520 | 473 |
| FOXR1        | -0.046887564 | 0.28587479  | 0.36582974 | 520 | 55  |
| EZH1         | -0.046927985 | 0.285459176 | 0.36536745 | 520 | 520 |
| CAMKK1       | -0.046934157 | 0.285395753 | 0.36530946 | 520 | 520 |
| FAM194A      | -0.04693979  | 0.285337872 | 0.36525856 | 520 | 390 |
| OR51L1       | -0.04695252  | 0.285207098 | 0.36511434 | 520 | 7   |
| ISM2         | -0.046967298 | 0.28505535  | 0.36494547 | 520 | 477 |
| HOXA4        | -0.047050499 | 0.284201969 | 0.36394313 | 520 | 511 |
| HPYR1        | -0.047058419 | 0.284120817 | 0.36386232 | 520 | 33  |
| RABL2A       | -0.047063395 | 0.284069853 | 0.36382015 | 520 | 520 |
| ERO1L        | -0.047079125 | 0.283908753 | 0.36370623 | 520 | 520 |

|              |              |             |            |     |     |
|--------------|--------------|-------------|------------|-----|-----|
| CLMN         | -0.04709376  | 0.283758931 | 0.3635374  | 520 | 520 |
| OR4F5        | -0.047105551 | 0.283638255 | 0.36342897 | 520 | 32  |
| MTL5         | -0.047116113 | 0.283530196 | 0.3633136  | 520 | 520 |
| OR10K2       | -0.047171948 | 0.282959382 | 0.3626445  | 520 | 14  |
| ZNF32        | -0.047193894 | 0.282735235 | 0.36243314 | 520 | 520 |
| GNRH2        | -0.047202193 | 0.28265051  | 0.36234757 | 520 | 122 |
| SNORA84      | -0.047232629 | 0.282339916 | 0.36199543 | 520 | 23  |
| PRAMEF22     | -0.047256927 | 0.282092124 | 0.36172373 | 520 | 55  |
| FAM27B       | -0.047273872 | 0.281919399 | 0.36154823 | 520 | 33  |
| GPR32        | -0.047279986 | 0.281857094 | 0.36149131 | 520 | 78  |
| FRG2B        | -0.04735242  | 0.281119704 | 0.36068323 | 520 | 211 |
| ALDH1A1      | -0.047390352 | 0.280734069 | 0.36028015 | 520 | 520 |
| ADAM30       | -0.047433853 | 0.280292253 | 0.35975894 | 520 | 67  |
| LRRC42       | -0.047447279 | 0.280155988 | 0.35960693 | 520 | 520 |
| C9orf89      | -0.047475787 | 0.279866801 | 0.35932723 | 520 | 520 |
| LOC729609    | -0.047478575 | 0.279838529 | 0.35931381 | 520 | 47  |
| CCT8L2       | -0.04748043  | 0.27981972  | 0.35931254 | 520 | 83  |
| CSHL1        | -0.047557995 | 0.279034016 | 0.3583721  | 520 | 11  |
| OR2H1        | -0.047561804 | 0.278995471 | 0.35834542 | 520 | 50  |
| OSGIN1       | -0.047565201 | 0.278961098 | 0.35832409 | 520 | 520 |
| BDNF         | -0.047594152 | 0.278668264 | 0.35797075 | 520 | 520 |
| PPP5C        | -0.047634697 | 0.27825852  | 0.3575583  | 520 | 520 |
| CARD18       | -0.047638018 | 0.278224977 | 0.35753798 | 520 | 462 |
| GPR115       | -0.047645566 | 0.278148746 | 0.3574628  | 520 | 519 |
| C1orf111     | -0.047649653 | 0.278107476 | 0.35743254 | 520 | 336 |
| BTBD10       | -0.047664721 | 0.277955363 | 0.35725981 | 520 | 520 |
| ZMAT1        | -0.047669374 | 0.277908402 | 0.35722222 | 520 | 516 |
| KRTAP9-9     | -0.047699652 | 0.27760294  | 0.35692059 | 520 | 23  |
| ASB17        | -0.04770463  | 0.277552741 | 0.35690157 | 520 | 8   |
| FAM74A4      | -0.04771281  | 0.277470257 | 0.35681826 | 520 | 13  |
| USP3         | -0.047785965 | 0.276733416 | 0.35598422 | 520 | 520 |
| OR6T1        | -0.04780041  | 0.27658808  | 0.35581996 | 520 | 74  |
| FAM111A      | -0.047866322 | 0.275925554 | 0.35508092 | 520 | 520 |
| TAS2R39      | -0.047895243 | 0.275635204 | 0.3547752  | 520 | 27  |
| IGFL1        | -0.047982721 | 0.274758207 | 0.35375931 | 520 | 515 |
| ST8SIA3      | -0.048015906 | 0.274426017 | 0.35335416 | 520 | 93  |
| ALDH1L1      | -0.04804601  | 0.274124905 | 0.35303408 | 520 | 514 |
| TEKT1        | -0.048067501 | 0.273910082 | 0.35280248 | 520 | 129 |
| GPNPAT1      | -0.048071011 | 0.273875008 | 0.35277984 | 520 | 520 |
| LOC100128842 | -0.04807645  | 0.273820663 | 0.35273237 | 520 | 518 |
| SETD1A       | -0.048083787 | 0.273747357 | 0.35269298 | 520 | 520 |
| FAM132A      | -0.048135048 | 0.273235625 | 0.3520687  | 520 | 513 |
| IFNA14       | -0.048138843 | 0.273197764 | 0.35204242 | 520 | 12  |
| GCNT2        | -0.048187488 | 0.272712796 | 0.35148487 | 520 | 519 |
| TMEM146      | -0.048189857 | 0.272689193 | 0.35147692 | 520 | 138 |
| TMEM84       | -0.04820172  | 0.272571025 | 0.35134707 | 520 | 400 |

|           |              |             |            |     |     |
|-----------|--------------|-------------|------------|-----|-----|
| UBE2L3    | -0.048226265 | 0.27232663  | 0.35112182 | 520 | 520 |
| MEP1B     | -0.048233709 | 0.272252537 | 0.35107119 | 520 | 251 |
| FRMD1     | -0.048252498 | 0.272065589 | 0.35087499 | 520 | 284 |
| MYLIP     | -0.048286852 | 0.271724007 | 0.350569   | 520 | 520 |
| KRTAP4-11 | -0.048322021 | 0.271374623 | 0.35014064 | 520 | 66  |
| GPN2      | -0.048324793 | 0.271347091 | 0.35012879 | 520 | 520 |
| CTR9      | -0.048327643 | 0.271318792 | 0.35012879 | 520 | 520 |
| TTY14     | -0.048333727 | 0.271258393 | 0.35008028 | 520 | 289 |
| EID2      | -0.048361573 | 0.27098206  | 0.34979081 | 520 | 520 |
| ZNF398    | -0.048374709 | 0.270851763 | 0.34966739 | 520 | 520 |
| KIR2DL1   | -0.048406172 | 0.270539869 | 0.34930946 | 520 | 293 |
| CCL1      | -0.048409373 | 0.270508148 | 0.34929087 | 520 | 274 |
| FBXW12    | -0.048413783 | 0.270464451 | 0.34927918 | 520 | 68  |
| VTI1B     | -0.048421542 | 0.270387592 | 0.34920229 | 520 | 520 |
| FLJ10038  | -0.048441273 | 0.270192197 | 0.34901701 | 520 | 520 |
| CTSW      | -0.048441286 | 0.27019206  | 0.34901701 | 520 | 520 |
| BTNL3     | -0.048488505 | 0.26972485  | 0.34848029 | 520 | 235 |
| TFPT      | -0.048653903 | 0.26809264  | 0.34650471 | 520 | 520 |
| TFF3      | -0.048661626 | 0.2680166   | 0.34642864 | 520 | 511 |
| TNIP3     | -0.048666338 | 0.267970205 | 0.34639087 | 520 | 520 |
| OR51Q1    | -0.048677681 | 0.267858553 | 0.34626874 | 520 | 78  |
| OR4S1     | -0.048709849 | 0.267542087 | 0.34590399 | 520 | 5   |
| BIRC8     | -0.048711291 | 0.26752791  | 0.34590399 | 520 | 58  |
| NOP2      | -0.04872187  | 0.267423894 | 0.3458177  | 520 | 520 |
| SLC22A11  | -0.048736537 | 0.267279726 | 0.34569778 | 520 | 373 |
| C12orf32  | -0.048738156 | 0.267263812 | 0.34569778 | 520 | 520 |
| C1orf91   | -0.048757089 | 0.267077802 | 0.3455031  | 520 | 520 |
| DENND2C   | -0.048785981 | 0.26679412  | 0.34520256 | 520 | 520 |
| ANP32A    | -0.048819443 | 0.26646583  | 0.34482204 | 520 | 520 |
| B4GALNT3  | -0.048880289 | 0.265869584 | 0.3441388  | 520 | 520 |
| OR2AG1    | -0.048887801 | 0.265796036 | 0.34406569 | 520 | 12  |
| GABRA4    | -0.048892297 | 0.265752018 | 0.3440308  | 520 | 256 |
| THAP8     | -0.048938621 | 0.265298833 | 0.34346617 | 520 | 520 |
| CELF6     | -0.048942143 | 0.265264391 | 0.34344364 | 520 | 518 |
| KDM4DL    | -0.048953751 | 0.265150931 | 0.3433325  | 520 | 122 |
| UBA7      | -0.048953892 | 0.265149553 | 0.3433325  | 520 | 520 |
| TUBE1     | -0.048978108 | 0.264912943 | 0.34307672 | 520 | 520 |
| OR1A1     | -0.04898863  | 0.264810186 | 0.34300974 | 520 | 21  |
| BTBD18    | -0.049004859 | 0.264651739 | 0.34287058 | 520 | 388 |
| TBCE      | -0.049012075 | 0.264581317 | 0.34280137 | 520 | 520 |
| TPX2      | -0.049029803 | 0.264408347 | 0.34259927 | 520 | 520 |
| C10orf62  | -0.049031829 | 0.264388577 | 0.34259567 | 520 | 213 |
| DNAJC1    | -0.049039785 | 0.264310983 | 0.34251714 | 520 | 520 |
| TLL6      | -0.049052612 | 0.264185909 | 0.34239907 | 520 | 260 |
| TTY7      | -0.049067587 | 0.264039944 | 0.3422847  | 520 | 12  |
| C9orf70   | -0.04907194  | 0.263997529 | 0.34226491 | 520 | 244 |

|           |              |             |            |     |     |
|-----------|--------------|-------------|------------|-----|-----|
| SIGMAR1   | -0.049090782 | 0.263813967 | 0.34207092 | 520 | 520 |
| CST9      | -0.049093652 | 0.263786013 | 0.34205667 | 520 | 216 |
| ADAM3A    | -0.049129965 | 0.26343253  | 0.34164224 | 520 | 16  |
| FAM21B    | -0.049136161 | 0.263372249 | 0.34158603 | 520 | 520 |
| C13orf30  | -0.049155947 | 0.263179809 | 0.34138036 | 520 | 261 |
| STAM      | -0.049197959 | 0.262771516 | 0.3408946  | 520 | 520 |
| SCAMP3    | -0.049200724 | 0.262744661 | 0.3408817  | 520 | 520 |
| C14orf178 | -0.049215212 | 0.262603974 | 0.34072109 | 520 | 275 |
| RP9P      | -0.04922007  | 0.26255681  | 0.34068182 | 520 | 520 |
| B3GALT6   | -0.049224772 | 0.262511171 | 0.34064452 | 520 | 520 |
| FLJ12825  | -0.049234022 | 0.262421396 | 0.34054994 | 520 | 484 |
| PPP1R12C  | -0.04929465  | 0.261833493 | 0.33994015 | 520 | 520 |
| C15orf39  | -0.049323594 | 0.26155315  | 0.33961992 | 520 | 520 |
| ORM2      | -0.049365415 | 0.261148456 | 0.3392255  | 520 | 227 |
| TRIP13    | -0.049389787 | 0.260912806 | 0.33894123 | 520 | 520 |
| TRIM24    | -0.04940864  | 0.260730616 | 0.33874821 | 520 | 520 |
| CSNK1G2   | -0.049411637 | 0.260701667 | 0.33873242 | 520 | 520 |
| ACOX1     | -0.049413138 | 0.260687172 | 0.33873242 | 520 | 520 |
| GSX2      | -0.049427939 | 0.260544213 | 0.33865877 | 520 | 54  |
| LOC344967 | -0.049469868 | 0.26013955  | 0.33817638 | 520 | 520 |
| BRD2      | -0.049474364 | 0.260096188 | 0.33814181 | 520 | 520 |
| FAM166B   | -0.049497741 | 0.259870789 | 0.33791414 | 520 | 499 |
| OR4D10    | -0.049504276 | 0.259807797 | 0.33785402 | 520 | 39  |
| ETS2      | -0.049522085 | 0.259636203 | 0.33765772 | 520 | 520 |
| PTH2      | -0.049530956 | 0.259550761 | 0.33758508 | 520 | 13  |
| USF2      | -0.04953204  | 0.259540319 | 0.33758508 | 520 | 520 |
| FABP9     | -0.049547342 | 0.259392977 | 0.33744085 | 520 | 60  |
| PROK1     | -0.04956079  | 0.259263535 | 0.33732029 | 520 | 238 |
| DPP7      | -0.049581707 | 0.259062296 | 0.33708022 | 520 | 520 |
| REEP1     | -0.049651067 | 0.258395759 | 0.33629975 | 520 | 520 |
| UGT2A3    | -0.049660402 | 0.258306137 | 0.33620481 | 520 | 132 |
| AMN1      | -0.049723639 | 0.257699614 | 0.33548034 | 520 | 520 |
| MRFAP1    | -0.049784303 | 0.2571187   | 0.33476732 | 520 | 520 |
| C17orf78  | -0.049785446 | 0.257107761 | 0.33476732 | 520 | 151 |
| FAM90A7   | -0.049812403 | 0.256849922 | 0.33446056 | 520 | 167 |
| C8orf12   | -0.049815146 | 0.256823702 | 0.33444802 | 520 | 137 |
| KCNK5     | -0.049828689 | 0.256694241 | 0.33432261 | 520 | 520 |
| A4GALT    | -0.049841457 | 0.256572233 | 0.33418529 | 520 | 520 |
| SMC5      | -0.049874679 | 0.256254951 | 0.33379359 | 520 | 520 |
| OR5K1     | -0.049876226 | 0.256240179 | 0.33379359 | 520 | 67  |
| OPN1MW    | -0.049967025 | 0.255374442 | 0.33275413 | 520 | 52  |
| OR4C13    | -0.050006633 | 0.254997432 | 0.33230584 | 520 | 14  |
| PCDH11Y   | -0.050017492 | 0.25489414  | 0.33221417 | 520 | 116 |
| WDR72     | -0.050188384 | 0.253272373 | 0.33027124 | 520 | 512 |
| MYBPHL    | -0.050196164 | 0.253198704 | 0.33023924 | 520 | 446 |
| CCDC9     | -0.050220876 | 0.252964828 | 0.32997689 | 520 | 520 |

|           |              |             |            |     |     |
|-----------|--------------|-------------|------------|-----|-----|
| ZSWIM7    | -0.050299232 | 0.252224257 | 0.32909602 | 520 | 520 |
| SNORA67   | -0.05031584  | 0.252067486 | 0.32893404 | 520 | 255 |
| NKG7      | -0.050324057 | 0.251989944 | 0.32887542 | 520 | 520 |
| TMEM170A  | -0.05034187  | 0.251821906 | 0.32867738 | 520 | 520 |
| OR10J1    | -0.050367499 | 0.251580269 | 0.32840452 | 520 | 16  |
| UBQLN3    | -0.050371343 | 0.251544038 | 0.32837848 | 520 | 21  |
| STXBP3    | -0.050398516 | 0.251288051 | 0.32808678 | 520 | 520 |
| CYB5B     | -0.050401754 | 0.251257559 | 0.32806821 | 520 | 520 |
| OBFC1     | -0.050410347 | 0.251176651 | 0.32798381 | 520 | 520 |
| ANKRD20B  | -0.050412263 | 0.25115862  | 0.3279815  | 520 | 461 |
| NR6A1     | -0.050423734 | 0.251050647 | 0.32786174 | 520 | 519 |
| RNPEPL1   | -0.050425334 | 0.251035587 | 0.32786174 | 520 | 520 |
| OR13C9    | -0.050437315 | 0.250922851 | 0.32775853 | 520 | 6   |
| LOC255025 | -0.050507804 | 0.250260307 | 0.3270414  | 520 | 9   |
| CYHR1     | -0.050541727 | 0.249941894 | 0.32673117 | 520 | 520 |
| PRMT1     | -0.050542224 | 0.249937232 | 0.32673117 | 520 | 520 |
| WDR13     | -0.050548378 | 0.2498795   | 0.32669197 | 520 | 520 |
| IGLL1     | -0.050596157 | 0.249431581 | 0.32614179 | 520 | 143 |
| VPS4A     | -0.05059755  | 0.249418537 | 0.32614179 | 520 | 520 |
| HEATR7A   | -0.050603858 | 0.249359444 | 0.32611715 | 520 | 520 |
| OR52E8    | -0.050638206 | 0.249037848 | 0.32573944 | 520 | 11  |
| XKR6      | -0.050655691 | 0.248874249 | 0.32556769 | 520 | 515 |
| BLZF1     | -0.05067391  | 0.248703865 | 0.32536591 | 520 | 520 |
| OR6B2     | -0.050673958 | 0.248703422 | 0.32536591 | 520 | 120 |
| DGAT2     | -0.050679024 | 0.248656055 | 0.32534558 | 520 | 520 |
| ZNF786    | -0.050693998 | 0.248516097 | 0.32520466 | 520 | 520 |
| C14orf53  | -0.050735466 | 0.248128798 | 0.32476107 | 520 | 9   |
| ZSCAN10   | -0.05074437  | 0.248045686 | 0.32467337 | 520 | 242 |
| CDKL3     | -0.050781523 | 0.247699128 | 0.3242408  | 520 | 520 |
| KRTAP12-4 | -0.050846161 | 0.247096981 | 0.32362065 | 520 | 21  |
| RPS6KL1   | -0.050857497 | 0.246991486 | 0.3235035  | 520 | 519 |
| C19orf30  | -0.050875464 | 0.246824353 | 0.32330559 | 520 | 47  |
| LOC440354 | -0.050883818 | 0.24674666  | 0.32323744 | 520 | 520 |
| CNP       | -0.050894846 | 0.246644132 | 0.3231325  | 520 | 520 |
| MOAP1     | -0.050927953 | 0.246336512 | 0.32277142 | 520 | 520 |
| PSIP1     | -0.05095079  | 0.246124477 | 0.32251455 | 520 | 520 |
| KLK1      | -0.050993214 | 0.245730919 | 0.32210351 | 520 | 517 |
| RNASEL    | -0.05104309  | 0.245268792 | 0.32153956 | 520 | 520 |
| FAM47B    | -0.051095082 | 0.244787698 | 0.32095059 | 520 | 26  |
| PPIAL4E   | -0.051110005 | 0.244649737 | 0.32081143 | 520 | 32  |
| LOC115110 | -0.051135457 | 0.244414561 | 0.32056558 | 520 | 519 |
| RABEPK    | -0.051138403 | 0.244387353 | 0.32055074 | 520 | 520 |
| GRWD1     | -0.051156503 | 0.244220218 | 0.32035236 | 520 | 520 |
| METTL8    | -0.051162561 | 0.244164299 | 0.32029984 | 520 | 520 |
| ARHGAP23  | -0.051189225 | 0.243918267 | 0.32001873 | 520 | 520 |
| LMO7      | -0.051196331 | 0.243852734 | 0.31995357 | 520 | 520 |

|              |              |             |            |     |     |
|--------------|--------------|-------------|------------|-----|-----|
| FAM184B      | -0.051200262 | 0.243816487 | 0.31992683 | 520 | 437 |
| FAM179A      | -0.051222227 | 0.243614002 | 0.31970275 | 520 | 518 |
| NUDT3        | -0.051236165 | 0.243485576 | 0.31955501 | 520 | 520 |
| BANF1        | -0.051260714 | 0.243259501 | 0.31927909 | 520 | 520 |
| CABP5        | -0.051287007 | 0.243017527 | 0.31900302 | 520 | 72  |
| PVRIG        | -0.05130238  | 0.242876126 | 0.31883816 | 520 | 520 |
| PRLHR        | -0.051348288 | 0.242454203 | 0.3184294  | 520 | 31  |
| FBLL1        | -0.051393359 | 0.242040481 | 0.31809322 | 520 | 452 |
| CDKN1A       | -0.051402331 | 0.241958182 | 0.31800579 | 520 | 520 |
| PES1         | -0.051409087 | 0.241896219 | 0.3179658  | 520 | 520 |
| IFI27L2      | -0.051413446 | 0.241856252 | 0.31793399 | 520 | 520 |
| MDFI         | -0.051444035 | 0.241575899 | 0.31758615 | 520 | 520 |
| IFRD1        | -0.051447824 | 0.241541185 | 0.31758193 | 520 | 520 |
| HULC         | -0.051539899 | 0.24069876  | 0.31653622 | 520 | 173 |
| C1orf204     | -0.051567933 | 0.240442676 | 0.31622007 | 520 | 519 |
| CELA2B       | -0.05158651  | 0.240273082 | 0.31605887 | 520 | 78  |
| KIAA1324     | -0.051599143 | 0.240157798 | 0.31592783 | 520 | 520 |
| CAPZA1       | -0.05160302  | 0.240122432 | 0.31590192 | 520 | 520 |
| C6orf35      | -0.051621299 | 0.239955713 | 0.31570318 | 520 | 520 |
| JMY          | -0.051667524 | 0.239534478 | 0.31523125 | 520 | 520 |
| HIST1H4E     | -0.051668473 | 0.239525835 | 0.31523125 | 520 | 492 |
| LENG1        | -0.051704374 | 0.239199045 | 0.31487202 | 520 | 520 |
| FAM120AOS    | -0.051747639 | 0.238805649 | 0.31437469 | 520 | 520 |
| OXCT1        | -0.051768044 | 0.238620261 | 0.31415115 | 520 | 520 |
| SCFD1        | -0.051781809 | 0.238495267 | 0.31400709 | 520 | 520 |
| PRDM14       | -0.051786169 | 0.238455679 | 0.31397547 | 520 | 60  |
| ARL4A        | -0.051808601 | 0.238252097 | 0.3137279  | 520 | 520 |
| SYMPK        | -0.051816067 | 0.238184371 | 0.3136592  | 520 | 520 |
| CSAG3        | -0.051823654 | 0.238115558 | 0.31358906 | 520 | 486 |
| SNORA14B     | -0.051831738 | 0.238042253 | 0.313513   | 520 | 26  |
| SLC38A9      | -0.051861774 | 0.237770017 | 0.31319536 | 520 | 520 |
| OPTC         | -0.051886386 | 0.237547112 | 0.31297068 | 520 | 38  |
| ZNF605       | -0.051924075 | 0.237206056 | 0.31255459 | 520 | 520 |
| TMEM57       | -0.05196903  | 0.236799695 | 0.31208033 | 520 | 520 |
| C17orf62     | -0.051972824 | 0.236765423 | 0.31205556 | 520 | 520 |
| LOC100272146 | -0.051974242 | 0.236752617 | 0.31205556 | 520 | 520 |
| OR14C36      | -0.052009135 | 0.236437588 | 0.31166422 | 520 | 8   |
| SMARCC2      | -0.052098042 | 0.23563625  | 0.31068916 | 520 | 520 |
| CEP152       | -0.052134967 | 0.235304001 | 0.31033226 | 520 | 520 |
| MAOB         | -0.052146887 | 0.235196818 | 0.31021119 | 520 | 519 |
| TBC1D10C     | -0.052148344 | 0.235183715 | 0.31021119 | 520 | 520 |
| SLC17A4      | -0.052168197 | 0.235005284 | 0.3100194  | 520 | 51  |
| DUS4L        | -0.052169073 | 0.234997413 | 0.3100194  | 520 | 520 |
| FLJ37307     | -0.052179959 | 0.234899608 | 0.30992055 | 520 | 393 |
| OR4C6        | -0.052183699 | 0.234866014 | 0.3098965  | 520 | 128 |
| PRSS48       | -0.05218952  | 0.23481374  | 0.3098478  | 520 | 34  |

|           |              |             |            |     |     |
|-----------|--------------|-------------|------------|-----|-----|
| F9        | -0.052190465 | 0.234805251 | 0.3098478  | 520 | 27  |
| DDX20     | -0.052215751 | 0.234578264 | 0.3095776  | 520 | 520 |
| RAD51AP1  | -0.052235339 | 0.234402525 | 0.30938617 | 520 | 520 |
| CBX3      | -0.052247784 | 0.234290922 | 0.30925911 | 520 | 520 |
| LOC144438 | -0.05226624  | 0.234125489 | 0.30908121 | 520 | 520 |
| LOC402644 | -0.05230481  | 0.233780018 | 0.30866555 | 520 | 58  |
| ZNF354A   | -0.052338645 | 0.233477251 | 0.30832637 | 520 | 520 |
| CARD16    | -0.052345544 | 0.233415557 | 0.30826508 | 520 | 520 |
| CCDC7     | -0.052353651 | 0.233343069 | 0.30818954 | 520 | 520 |
| ZAP70     | -0.052360965 | 0.233277683 | 0.30812336 | 520 | 520 |
| C6orf127  | -0.052368582 | 0.233209604 | 0.30805523 | 520 | 82  |
| OTOL1     | -0.052371103 | 0.233187073 | 0.30805523 | 520 | 17  |
| ACSM2B    | -0.052450331 | 0.232479836 | 0.30721039 | 520 | 82  |
| RAX2      | -0.052508561 | 0.231960998 | 0.30658505 | 520 | 71  |
| TSPAN8    | -0.052529365 | 0.231775838 | 0.30636041 | 520 | 431 |
| MSTN      | -0.052543267 | 0.231652158 | 0.306217   | 520 | 378 |
| LRRC48    | -0.052560328 | 0.231500449 | 0.30603652 | 520 | 520 |
| OR4C45    | -0.052563518 | 0.231472082 | 0.30601908 | 520 | 7   |
| NUP188    | -0.052583084 | 0.231298199 | 0.30580925 | 520 | 520 |
| STX18     | -0.052603543 | 0.231116467 | 0.30558901 | 520 | 520 |
| MMP24     | -0.052617522 | 0.230992362 | 0.30546498 | 520 | 520 |
| LOC728643 | -0.052623499 | 0.23093931  | 0.30541485 | 520 | 520 |
| OXSRI     | -0.052625411 | 0.230922339 | 0.30541244 | 520 | 520 |
| LOC121838 | -0.052631313 | 0.230869961 | 0.30536319 | 520 | 261 |
| LHFPL3    | -0.052638331 | 0.230807698 | 0.30530123 | 520 | 227 |
| RANGRF    | -0.052646754 | 0.230732981 | 0.30524208 | 520 | 520 |
| SRCIN1    | -0.052651184 | 0.23069369  | 0.30521013 | 520 | 520 |
| COX7A2L   | -0.052654476 | 0.230664499 | 0.30519153 | 520 | 520 |
| FTMT      | -0.052660469 | 0.230611357 | 0.30514124 | 520 | 9   |
| OR13C2    | -0.052686304 | 0.230382379 | 0.30487828 | 520 | 16  |
| OR8D4     | -0.052740261 | 0.229904672 | 0.30430601 | 520 | 13  |
| PIGB      | -0.05274098  | 0.229898304 | 0.30430601 | 520 | 520 |
| NAT8      | -0.052765303 | 0.229683197 | 0.30411268 | 520 | 327 |
| C5orf34   | -0.052773275 | 0.229612726 | 0.30403934 | 520 | 519 |
| HEPACAM   | -0.052842041 | 0.229005472 | 0.303295   | 520 | 201 |
| STAU2     | -0.052879429 | 0.22867579  | 0.30291805 | 520 | 520 |
| TCEB3B    | -0.052926501 | 0.228261191 | 0.30240858 | 520 | 226 |
| TMEM223   | -0.052930269 | 0.228228028 | 0.30240039 | 520 | 520 |
| ZC3HC1    | -0.05294739  | 0.228077375 | 0.30222463 | 520 | 520 |
| NUDT9     | -0.052966433 | 0.227909896 | 0.30206225 | 520 | 520 |
| OR2T12    | -0.052991714 | 0.227687697 | 0.30184712 | 520 | 6   |
| FLJ10661  | -0.052995614 | 0.227653429 | 0.30182154 | 520 | 514 |
| PACRGL    | -0.053049363 | 0.227181565 | 0.30121575 | 520 | 520 |
| FBXO28    | -0.053089251 | 0.226831849 | 0.30083119 | 520 | 520 |
| SMEK1     | -0.053093103 | 0.226798091 | 0.3008062  | 520 | 520 |
| KRTAP10-7 | -0.053100864 | 0.226730099 | 0.3007358  | 520 | 17  |



|             |              |             |            |     |     |
|-------------|--------------|-------------|------------|-----|-----|
| ANKRD20A3   | -0.053106845 | 0.226677705 | 0.30068609 | 520 | 486 |
| CCL14-CCL15 | -0.053134491 | 0.22643566  | 0.30038478 | 520 | 67  |
| OR10G7      | -0.053145419 | 0.22634003  | 0.30027767 | 520 | 3   |
| SNORA11     | -0.053147204 | 0.226324417 | 0.30027767 | 520 | 12  |
| OR2Z1       | -0.053171952 | 0.22610797  | 0.30004877 | 520 | 41  |
| VPS37A      | -0.053190727 | 0.225943864 | 0.29987047 | 520 | 520 |
| RP9         | -0.053204699 | 0.225821797 | 0.29972819 | 520 | 520 |
| S100A10     | -0.053222113 | 0.225669715 | 0.29956578 | 520 | 520 |
| TBC1D22A    | -0.053249799 | 0.225428088 | 0.29926473 | 520 | 520 |
| GJA10       | -0.053262308 | 0.225318978 | 0.29913957 | 520 | 82  |
| FBXO18      | -0.053297232 | 0.225014538 | 0.29877474 | 520 | 520 |
| HIST1H2BI   | -0.053352549 | 0.224532938 | 0.29821382 | 520 | 346 |
| CTDSPL      | -0.053378226 | 0.224309637 | 0.29795649 | 520 | 520 |
| ADAM2       | -0.053433373 | 0.223827495 | 0.29739441 | 520 | 18  |
| RPA1        | -0.053497273 | 0.223276423 | 0.29668177 | 520 | 520 |
| TFB2M       | -0.053526737 | 0.223021225 | 0.2963622  | 520 | 520 |
| NAT8B       | -0.053531256 | 0.222982104 | 0.29632974 | 520 | 430 |
| OR14A16     | -0.053563191 | 0.222705778 | 0.29598203 | 520 | 12  |
| HIGD1C      | -0.053569397 | 0.222652102 | 0.29593019 | 520 | 10  |
| TP63        | -0.053591747 | 0.222458892 | 0.29571964 | 520 | 520 |
| SCARNA23    | -0.053622991 | 0.22218899  | 0.29539255 | 520 | 3   |
| HOXA6       | -0.05367921  | 0.221703939 | 0.294806   | 520 | 461 |
| EPO         | -0.053711907 | 0.221422177 | 0.2944896  | 520 | 465 |
| LOC550112   | -0.053723053 | 0.221326193 | 0.29440435 | 520 | 520 |
| MED24       | -0.053780903 | 0.220828466 | 0.29381624 | 520 | 520 |
| KIAA0368    | -0.053801331 | 0.220652896 | 0.29360202 | 520 | 520 |
| BRF2        | -0.053815292 | 0.220532968 | 0.29350055 | 520 | 520 |
| SYT10       | -0.053836225 | 0.22035323  | 0.29330005 | 520 | 161 |
| FAM82B      | -0.05385515  | 0.220190831 | 0.29310324 | 520 | 520 |
| FNTB        | -0.053881621 | 0.219963814 | 0.29285905 | 520 | 520 |
| LOC440563   | -0.053883327 | 0.21994919  | 0.29285892 | 520 | 412 |
| IRAK2       | -0.053903506 | 0.21977626  | 0.29266732 | 520 | 520 |
| SLC25A22    | -0.05393073  | 0.219543104 | 0.29241477 | 520 | 520 |
| NKRF        | -0.053974991 | 0.219164416 | 0.29194895 | 520 | 520 |
| SNCG        | -0.053993467 | 0.219006477 | 0.29181567 | 520 | 520 |
| DOCK3       | -0.054012422 | 0.218844533 | 0.29165771 | 520 | 519 |
| AQP12B      | -0.054015251 | 0.218820371 | 0.29164479 | 520 | 187 |
| DSC3        | -0.054029226 | 0.218701034 | 0.29156282 | 520 | 520 |
| C13orf37    | -0.054034367 | 0.218657146 | 0.29152358 | 520 | 520 |
| GPR114      | -0.054077848 | 0.218286208 | 0.29108677 | 520 | 517 |
| ZNF658      | -0.054131011 | 0.217833279 | 0.29055965 | 520 | 519 |
| RPL23AP32   | -0.054137651 | 0.217776761 | 0.29050348 | 520 | 291 |
| OR10R2      | -0.054144456 | 0.21771884  | 0.29044543 | 520 | 4   |
| BCYRN1      | -0.054176374 | 0.21744734  | 0.29012163 | 520 | 19  |
| C15orf43    | -0.054185797 | 0.217367234 | 0.29003394 | 520 | 25  |
| GOLGA6D     | -0.05420087  | 0.217239141 | 0.28988221 | 520 | 19  |

|              |              |             |            |     |     |
|--------------|--------------|-------------|------------|-----|-----|
| PWP2         | -0.054280717 | 0.216561474 | 0.28909272 | 520 | 520 |
| GGA2         | -0.054284814 | 0.216526737 | 0.28906549 | 520 | 520 |
| LOC100130238 | -0.054332547 | 0.216122403 | 0.28859355 | 520 | 421 |
| B9D1         | -0.054388547 | 0.215648724 | 0.28808406 | 520 | 520 |
| IL28B        | -0.054411889 | 0.215451505 | 0.28783967 | 520 | 201 |
| GPS1         | -0.054420872 | 0.215375638 | 0.28775738 | 520 | 520 |
| ADSSL1       | -0.054420939 | 0.215375076 | 0.28775738 | 520 | 520 |
| GRM7         | -0.054452001 | 0.215112892 | 0.28748253 | 520 | 251 |
| CCL28        | -0.054452434 | 0.215109241 | 0.28748253 | 520 | 518 |
| C17orf64     | -0.054459737 | 0.215047632 | 0.28743341 | 520 | 281 |
| STH          | -0.054479097 | 0.214884376 | 0.28725328 | 520 | 17  |
| ZNF83        | -0.054516604 | 0.214568348 | 0.28692593 | 520 | 520 |
| FGF11        | -0.054533863 | 0.214423042 | 0.28675064 | 520 | 520 |
| POP1         | -0.054560611 | 0.214197976 | 0.28650667 | 520 | 520 |
| GPR81        | -0.054573336 | 0.214090969 | 0.28643028 | 520 | 455 |
| TXK          | -0.054596748 | 0.213894184 | 0.28619524 | 520 | 509 |
| MPP3         | -0.054601169 | 0.213857043 | 0.28616454 | 520 | 520 |
| IFNA21       | -0.054623403 | 0.213670299 | 0.28595261 | 520 | 68  |
| TMEM151B     | -0.054670831 | 0.213272362 | 0.28545794 | 520 | 511 |
| ZNF408       | -0.054714694 | 0.212904804 | 0.2849849  | 520 | 520 |
| PROM1        | -0.054767345 | 0.21246421  | 0.28448956 | 520 | 483 |
| GLYAT        | -0.054783592 | 0.212328391 | 0.28432658 | 520 | 204 |
| RIOK2        | -0.054789654 | 0.212277728 | 0.2842965  | 520 | 520 |
| SLC11A2      | -0.054803011 | 0.212166123 | 0.28418478 | 520 | 520 |
| TRIM64       | -0.054820709 | 0.212018323 | 0.28400568 | 520 | 21  |
| RHOD         | -0.054834493 | 0.211903258 | 0.2838704  | 520 | 520 |
| VPS13A       | -0.054842501 | 0.211836433 | 0.28383478 | 520 | 520 |
| CDRT15P      | -0.054842687 | 0.211834882 | 0.28383478 | 520 | 511 |
| MTVR2        | -0.05486676  | 0.211634079 | 0.28362286 | 520 | 199 |
| DDR1         | -0.054884545 | 0.211485822 | 0.28344301 | 520 | 520 |
| KGFLP2       | -0.05490484  | 0.211316724 | 0.28323521 | 520 | 520 |
| OGT          | -0.054909696 | 0.211276286 | 0.28319983 | 520 | 520 |
| LRRIQ3       | -0.054947429 | 0.210962206 | 0.28281643 | 520 | 509 |
| APOL3        | -0.054948663 | 0.210951938 | 0.28281643 | 520 | 520 |
| PAX4         | -0.055013203 | 0.21041552  | 0.28217734 | 520 | 29  |
| STRADB       | -0.055027859 | 0.210293846 | 0.28204247 | 520 | 520 |
| C9orf128     | -0.055029427 | 0.21028083  | 0.28204247 | 520 | 217 |
| C7orf71      | -0.055030812 | 0.210269336 | 0.28204247 | 520 | 202 |
| LOC723809    | -0.055043851 | 0.210161144 | 0.28192997 | 520 | 268 |
| AANAT        | -0.055085678 | 0.209814329 | 0.2815209  | 520 | 365 |
| CXorf40B     | -0.055106157 | 0.209644679 | 0.28131199 | 520 | 520 |
| SRRM3        | -0.055147319 | 0.20930398  | 0.28087352 | 520 | 520 |
| TBC1D29      | -0.05517224  | 0.209097906 | 0.2806334  | 520 | 113 |
| AMZ2         | -0.055173553 | 0.209087059 | 0.2806334  | 520 | 520 |
| PLK1         | -0.055213058 | 0.208760698 | 0.28023771 | 520 | 520 |
| NKX6-2       | -0.055230729 | 0.208614832 | 0.28009785 | 520 | 86  |

|          |              |             |            |     |     |
|----------|--------------|-------------|------------|-----|-----|
| KRT14    | -0.055231365 | 0.208609584 | 0.28009785 | 520 | 520 |
| MTMR8    | -0.055231951 | 0.208604752 | 0.28009785 | 520 | 497 |
| PRAMEF12 | -0.055263141 | 0.208347485 | 0.27984046 | 520 | 77  |
| PIAS4    | -0.055338483 | 0.207726974 | 0.2790916  | 520 | 520 |
| CYP3A7   | -0.055346694 | 0.207659432 | 0.27901944 | 520 | 348 |
| ZNF117   | -0.055436799 | 0.206919279 | 0.27811761 | 520 | 520 |
| BANP     | -0.055453278 | 0.206784119 | 0.27795447 | 520 | 520 |
| FNDC8    | -0.055496349 | 0.206431159 | 0.27753553 | 520 | 515 |
| C6orf164 | -0.055498776 | 0.206411285 | 0.27752732 | 520 | 507 |
| CUTA     | -0.055527047 | 0.206179858 | 0.27725313 | 520 | 520 |
| SERF1A   | -0.055563841 | 0.205878949 | 0.27688542 | 520 | 520 |
| GSTM4    | -0.055588843 | 0.20567466  | 0.27662913 | 520 | 520 |
| ZNF581   | -0.055611311 | 0.205491196 | 0.27640081 | 520 | 520 |
| PRR23A   | -0.055634489 | 0.205302061 | 0.27616483 | 520 | 112 |
| POLD3    | -0.055647145 | 0.205198839 | 0.27606281 | 520 | 520 |
| OR6C65   | -0.055697942 | 0.204784929 | 0.27554273 | 520 | 24  |
| SBNO2    | -0.055741282 | 0.20443226  | 0.27508656 | 520 | 520 |
| PLCB3    | -0.055781367 | 0.204106466 | 0.27468483 | 520 | 520 |
| C5orf27  | -0.055788279 | 0.204050323 | 0.2746276  | 520 | 473 |
| PPP2R4   | -0.055799728 | 0.203957364 | 0.27453914 | 520 | 520 |
| HAUS1    | -0.055813879 | 0.203842497 | 0.27440284 | 520 | 520 |
| C9orf172 | -0.055836058 | 0.203662575 | 0.27419255 | 520 | 511 |
| HDGFRP2  | -0.055850705 | 0.203543807 | 0.27405564 | 520 | 520 |
| ADAL     | -0.055852422 | 0.203529887 | 0.2740552  | 520 | 520 |
| SLC22A18 | -0.055879411 | 0.2033112   | 0.27377902 | 520 | 520 |
| LRRRC8E  | -0.055915864 | 0.20301609  | 0.27339988 | 520 | 520 |
| CCDC19   | -0.05591654  | 0.203010617 | 0.27339988 | 520 | 520 |
| GLT6D1   | -0.055921466 | 0.202970762 | 0.27337536 | 520 | 29  |
| ADH4     | -0.055927576 | 0.202921338 | 0.27332704 | 520 | 222 |
| MGEA5    | -0.055929152 | 0.202908592 | 0.27332704 | 520 | 520 |
| SCARNA10 | -0.055938563 | 0.202832489 | 0.27324657 | 520 | 417 |
| CELF3    | -0.055969351 | 0.202583644 | 0.2729816  | 520 | 142 |
| STX6     | -0.055970148 | 0.202577207 | 0.2729816  | 520 | 520 |
| ZNF446   | -0.055994561 | 0.202380052 | 0.27278017 | 520 | 520 |
| LRRRC10  | -0.056005615 | 0.202290831 | 0.27267814 | 520 | 65  |
| ACTR3B   | -0.056023991 | 0.202142568 | 0.27249651 | 520 | 520 |
| ELAVL3   | -0.056029093 | 0.202101417 | 0.27245925 | 520 | 255 |
| MFSD3    | -0.05605289  | 0.201909569 | 0.27221881 | 520 | 520 |
| LCE3B    | -0.056083794 | 0.201660617 | 0.27190135 | 520 | 40  |
| AKR1E2   | -0.056092872 | 0.201587527 | 0.27187552 | 520 | 515 |
| CCDC71   | -0.056124584 | 0.201332369 | 0.27156772 | 520 | 520 |
| PLAGL2   | -0.056125746 | 0.201323022 | 0.27156772 | 520 | 520 |
| CRABP1   | -0.056146033 | 0.201159919 | 0.27137142 | 520 | 498 |
| SPATA3   | -0.056156834 | 0.201073115 | 0.27127247 | 520 | 24  |
| HIST1H4J | -0.056167608 | 0.200986561 | 0.27117384 | 520 | 520 |
| SMARCA4  | -0.056182954 | 0.200863325 | 0.2710257  | 520 | 520 |

|           |              |             |            |     |     |
|-----------|--------------|-------------|------------|-----|-----|
| EIF2S1    | -0.05619719  | 0.200749047 | 0.27088963 | 520 | 520 |
| CTRB1     | -0.056229332 | 0.200491212 | 0.27057793 | 520 | 88  |
| ZNF804B   | -0.056236011 | 0.200437669 | 0.27052377 | 520 | 36  |
| FLJ26850  | -0.056269503 | 0.200169311 | 0.27017966 | 520 | 358 |
| LOC647288 | -0.056288506 | 0.200017162 | 0.27001045 | 520 | 520 |
| SLC35A3   | -0.056294459 | 0.199969518 | 0.2699642  | 520 | 520 |
| RFC3      | -0.056330329 | 0.199682603 | 0.26964908 | 520 | 520 |
| NKX2-2    | -0.056335285 | 0.199642986 | 0.26961363 | 520 | 247 |
| FAM82A2   | -0.056368374 | 0.199378626 | 0.26931073 | 520 | 520 |
| NME1-NME2 | -0.056410981 | 0.199038595 | 0.26888746 | 520 | 520 |
| TAAR6     | -0.056430008 | 0.198886881 | 0.26870051 | 520 | 17  |
| OR52K1    | -0.056431544 | 0.198874639 | 0.26870051 | 520 | 11  |
| OR52R1    | -0.0564316   | 0.198874192 | 0.26870051 | 520 | 30  |
| C7orf50   | -0.056437871 | 0.198824208 | 0.26866984 | 520 | 520 |
| MBOAT2    | -0.056447347 | 0.198748707 | 0.26858581 | 520 | 520 |
| ZNF248    | -0.056462401 | 0.198628791 | 0.26844175 | 520 | 520 |
| SNX5      | -0.056504326 | 0.198295115 | 0.26802673 | 520 | 520 |
| MANBAL    | -0.056506156 | 0.198280562 | 0.26802502 | 520 | 520 |
| FLJ42627  | -0.056525245 | 0.198128779 | 0.26785576 | 520 | 519 |
| MTBP      | -0.056552781 | 0.197909985 | 0.26757791 | 520 | 520 |
| DVL1      | -0.056621598 | 0.197363941 | 0.26689333 | 520 | 520 |
| VN1R4     | -0.056632269 | 0.19727937  | 0.26679686 | 520 | 14  |
| FAM127B   | -0.056647613 | 0.197157804 | 0.26665034 | 520 | 520 |
| LY6G6E    | -0.056649262 | 0.197144749 | 0.26665034 | 520 | 207 |
| CCDC30    | -0.056689265 | 0.196828099 | 0.26627587 | 520 | 520 |
| OR1A2     | -0.056698581 | 0.196754412 | 0.26622977 | 520 | 32  |
| KLHL21    | -0.056711136 | 0.196655128 | 0.26613114 | 520 | 520 |
| ATP6V0E1  | -0.056721933 | 0.196569783 | 0.2660335  | 520 | 520 |
| GTPBP2    | -0.056744329 | 0.196392842 | 0.26581187 | 520 | 520 |
| WDR75     | -0.056760093 | 0.196268364 | 0.26567906 | 520 | 520 |
| LOC151300 | -0.056762735 | 0.196247505 | 0.26566866 | 520 | 28  |
| CHMP7     | -0.056793644 | 0.196003619 | 0.26537413 | 520 | 520 |
| KIR3DL1   | -0.056801706 | 0.195940045 | 0.26532266 | 520 | 328 |
| HYAL4     | -0.056807952 | 0.1958908   | 0.26527482 | 520 | 449 |
| TMC1      | -0.056834247 | 0.195683584 | 0.26504761 | 520 | 439 |
| SNORA45   | -0.056877527 | 0.195342874 | 0.2646039  | 520 | 46  |
| 14-Sep    | -0.056920465 | 0.195005276 | 0.26419985 | 520 | 112 |
| MGC34034  | -0.056973761 | 0.194586844 | 0.2636861  | 520 | 40  |
| GALNT4    | -0.056985105 | 0.194497864 | 0.26358323 | 520 | 520 |
| CLUAP1    | -0.057008586 | 0.194313781 | 0.26335146 | 520 | 520 |
| LOC644669 | -0.057014145 | 0.194270214 | 0.26331012 | 520 | 27  |
| OR4A5     | -0.057048688 | 0.193999687 | 0.2629788  | 520 | 10  |
| FAM160A1  | -0.057053632 | 0.19396099  | 0.26294402 | 520 | 520 |
| KRTAP5-2  | -0.057075287 | 0.19379156  | 0.262732   | 520 | 327 |
| TXLNA     | -0.057105774 | 0.193553213 | 0.2624618  | 520 | 520 |
| ADH5      | -0.057120612 | 0.193437283 | 0.26233988 | 520 | 520 |

|              |              |             |            |     |     |
|--------------|--------------|-------------|------------|-----|-----|
| LDHB         | -0.057125018 | 0.193402868 | 0.26231085 | 520 | 520 |
| OR51G1       | -0.057148886 | 0.193216521 | 0.26209337 | 520 | 16  |
| C5           | -0.057165032 | 0.193090547 | 0.26194292 | 520 | 519 |
| NCRNA00099   | -0.05717271  | 0.193030657 | 0.2618941  | 520 | 118 |
| UBE2G1       | -0.057186805 | 0.192920747 | 0.2617626  | 520 | 520 |
| APOF         | -0.057200812 | 0.192811577 | 0.26164968 | 520 | 147 |
| VPREB1       | -0.057223395 | 0.192635657 | 0.26151655 | 520 | 36  |
| CDK16        | -0.057238124 | 0.192520979 | 0.26137847 | 520 | 520 |
| GPR151       | -0.05724358  | 0.192478512 | 0.26133841 | 520 | 72  |
| LOC100192426 | -0.057259337 | 0.192355909 | 0.26120712 | 520 | 48  |
| C11orf71     | -0.05727076  | 0.192267069 | 0.26110407 | 520 | 520 |
| CYP24A1      | -0.057316166 | 0.191914204 | 0.26067444 | 520 | 519 |
| FAM122A      | -0.057318956 | 0.191892538 | 0.26066567 | 520 | 520 |
| NTSR2        | -0.057348306 | 0.191664726 | 0.26039129 | 520 | 186 |
| STK24        | -0.057375523 | 0.191453647 | 0.26012205 | 520 | 520 |
| YIPF4        | -0.05737828  | 0.191432278 | 0.26011054 | 520 | 520 |
| C10orf137    | -0.057388245 | 0.191355039 | 0.26005817 | 520 | 520 |
| ARHGAP32     | -0.057405792 | 0.191219101 | 0.25989094 | 520 | 520 |
| BTNL2        | -0.057411425 | 0.19117547  | 0.25984915 | 520 | 123 |
| ARHGAP19     | -0.057416867 | 0.191133335 | 0.25982691 | 520 | 520 |
| C18orf45     | -0.057418054 | 0.191124142 | 0.25982691 | 520 | 520 |
| TNFSF18      | -0.05742025  | 0.191107141 | 0.25982634 | 520 | 466 |
| KCNG4        | -0.057438333 | 0.190967182 | 0.25965356 | 520 | 74  |
| KIAA0226     | -0.05745648  | 0.190826797 | 0.25949768 | 520 | 520 |
| MTERF        | -0.057471285 | 0.190712332 | 0.25935951 | 520 | 520 |
| GP6          | -0.057497279 | 0.190511463 | 0.25910381 | 520 | 469 |
| KLK7         | -0.057518366 | 0.190348637 | 0.258931   | 520 | 513 |
| OR10H3       | -0.057580624 | 0.189868486 | 0.25831645 | 520 | 13  |
| NR2E3        | -0.057583887 | 0.189843345 | 0.25829968 | 520 | 460 |
| C17orf48     | -0.057616122 | 0.189595115 | 0.25799675 | 520 | 520 |
| C14orf148    | -0.057616834 | 0.189589633 | 0.25799675 | 520 | 496 |
| AURKA        | -0.057618708 | 0.189575205 | 0.25799675 | 520 | 520 |
| FAM187B      | -0.057621065 | 0.189557068 | 0.25799675 | 520 | 172 |
| EDC4         | -0.057623864 | 0.189535528 | 0.25799675 | 520 | 520 |
| CYLC2        | -0.057634265 | 0.189455504 | 0.25792862 | 520 | 46  |
| SAP30L       | -0.057639271 | 0.189416998 | 0.25789361 | 520 | 520 |
| HIST1H4H     | -0.057678925 | 0.189112172 | 0.25749597 | 520 | 520 |
| SPATA2       | -0.057696154 | 0.188979841 | 0.25733317 | 520 | 520 |
| MARK3        | -0.057757546 | 0.188508871 | 0.25672652 | 520 | 520 |
| KLHL12       | -0.057771112 | 0.188404915 | 0.25667162 | 520 | 520 |
| RGSL1        | -0.057782067 | 0.188320994 | 0.25659197 | 520 | 239 |
| SSSCA1       | -0.057787437 | 0.188279874 | 0.25655328 | 520 | 520 |
| STAG3L4      | -0.057813483 | 0.188080498 | 0.2563509  | 520 | 520 |
| SPINK13      | -0.057860049 | 0.187724433 | 0.25592347 | 520 | 164 |
| ISCA1P1      | -0.057888298 | 0.187508675 | 0.2556752  | 520 | 520 |
| MOCS2        | -0.057913567 | 0.187315826 | 0.25542952 | 520 | 520 |

|            |              |             |            |     |     |
|------------|--------------|-------------|------------|-----|-----|
| SPAM1      | -0.057926141 | 0.187219925 | 0.25531601 | 520 | 50  |
| AKR7A2     | -0.057945377 | 0.187073273 | 0.25516779 | 520 | 520 |
| PTBP1      | -0.057976478 | 0.186836346 | 0.25489635 | 520 | 520 |
| ZNF324B    | -0.057978731 | 0.186819188 | 0.25489019 | 520 | 520 |
| DRGX       | -0.057992006 | 0.186718135 | 0.2547868  | 520 | 107 |
| DCUN1D2    | -0.058024561 | 0.186470484 | 0.25451776 | 520 | 520 |
| NOD2       | -0.058040347 | 0.186350484 | 0.25437119 | 520 | 520 |
| MED16      | -0.058078619 | 0.186059788 | 0.25404317 | 520 | 520 |
| C7orf54    | -0.058087015 | 0.185996063 | 0.25397336 | 520 | 450 |
| SLC10A3    | -0.058089179 | 0.185979643 | 0.25396814 | 520 | 520 |
| FAM173B    | -0.058106304 | 0.185849719 | 0.2538251  | 520 | 520 |
| OR6A2      | -0.058141484 | 0.18558303  | 0.25352955 | 520 | 55  |
| HES4       | -0.058164846 | 0.185406085 | 0.25332215 | 520 | 520 |
| TAP1       | -0.058194446 | 0.18518207  | 0.25305037 | 520 | 520 |
| BCL2L2     | -0.058214339 | 0.185031627 | 0.25286193 | 520 | 520 |
| C3orf39    | -0.058242266 | 0.184820583 | 0.25262488 | 520 | 520 |
| TMEM139    | -0.058277657 | 0.184553392 | 0.25231098 | 520 | 504 |
| CRB2       | -0.058288804 | 0.184469298 | 0.25223021 | 520 | 464 |
| TCERG1     | -0.058301181 | 0.184375947 | 0.25213676 | 520 | 520 |
| OR52A4     | -0.058302586 | 0.184365352 | 0.25213676 | 520 | 5   |
| CIDECP     | -0.058351421 | 0.183997409 | 0.25165324 | 520 | 520 |
| DNAJB2     | -0.058386705 | 0.183731896 | 0.25137535 | 520 | 520 |
| OR5C1      | -0.058405312 | 0.183591997 | 0.25120099 | 520 | 92  |
| SNX16      | -0.05840798  | 0.183571946 | 0.2511906  | 520 | 520 |
| OR1F2P     | -0.058421243 | 0.183472275 | 0.25107126 | 520 | 175 |
| C11orf34   | -0.058433245 | 0.183382125 | 0.25096492 | 520 | 169 |
| CASP1      | -0.058467195 | 0.183127275 | 0.25066719 | 520 | 520 |
| OR4C15     | -0.058476504 | 0.183057447 | 0.25060251 | 520 | 13  |
| LOC494141  | -0.058498053 | 0.182895868 | 0.25040143 | 520 | 155 |
| ANK3       | -0.058568942 | 0.182365081 | 0.24969169 | 520 | 520 |
| KRTAP10-11 | -0.058569646 | 0.182359817 | 0.24969169 | 520 | 33  |
| ASL        | -0.05858372  | 0.182254573 | 0.24957428 | 520 | 520 |
| ACAD10     | -0.058599857 | 0.182133962 | 0.24942605 | 520 | 520 |
| WDR24      | -0.058628377 | 0.181920942 | 0.24916818 | 520 | 520 |
| PRSS54     | -0.05863454  | 0.181874931 | 0.24912208 | 520 | 57  |
| AQP7       | -0.058646883 | 0.181782808 | 0.24901281 | 520 | 444 |
| ABCC2      | -0.058652935 | 0.181737659 | 0.24896788 | 520 | 519 |
| C20orf85   | -0.058661311 | 0.181675173 | 0.24889918 | 520 | 131 |
| RHCE       | -0.05866332  | 0.181660188 | 0.24889556 | 520 | 514 |
| RAB35      | -0.058698219 | 0.181400045 | 0.24857292 | 520 | 520 |
| C21orf67   | -0.058698572 | 0.181397419 | 0.24857292 | 520 | 520 |
| LOC728743  | -0.058736419 | 0.181115616 | 0.24823377 | 520 | 520 |
| XRCC6      | -0.05874919  | 0.181020598 | 0.24815505 | 520 | 520 |
| C19orf50   | -0.058749255 | 0.18102011  | 0.24815505 | 520 | 520 |
| WWC1       | -0.058759159 | 0.18094645  | 0.24811997 | 520 | 520 |
| ISL2       | -0.05876518  | 0.180901679 | 0.24809233 | 520 | 516 |

|           |              |             |            |     |     |
|-----------|--------------|-------------|------------|-----|-----|
| SLC26A8   | -0.058855158 | 0.1802336   | 0.24726019 | 520 | 365 |
| ANXA8L2   | -0.058874432 | 0.180090733 | 0.24708101 | 520 | 520 |
| HRNR      | -0.058891615 | 0.179963438 | 0.24693996 | 520 | 514 |
| VNN2      | -0.059058284 | 0.178732139 | 0.2453673  | 520 | 519 |
| SCOC      | -0.059118301 | 0.178290283 | 0.24481071 | 520 | 520 |
| KIF21A    | -0.059126396 | 0.178230752 | 0.24475434 | 520 | 520 |
| C10orf79  | -0.059153491 | 0.178031589 | 0.24453876 | 520 | 512 |
| USH1C     | -0.05915514  | 0.178019472 | 0.24453876 | 520 | 321 |
| ZNF396    | -0.059173897 | 0.177881702 | 0.2443976  | 520 | 516 |
| ANAPC10   | -0.059175747 | 0.177868116 | 0.24439746 | 520 | 520 |
| SLC16A6   | -0.059196902 | 0.177712838 | 0.24420074 | 520 | 517 |
| KCNV2     | -0.059203532 | 0.177664197 | 0.24415054 | 520 | 379 |
| XPNPEP1   | -0.05921672  | 0.177567464 | 0.24403424 | 520 | 520 |
| SLC17A2   | -0.059236764 | 0.17742052  | 0.24384891 | 520 | 56  |
| CCDC43    | -0.059271434 | 0.177166569 | 0.24351648 | 520 | 520 |
| AQP12A    | -0.059279383 | 0.177108381 | 0.24346491 | 520 | 37  |
| FASTKD5   | -0.059292128 | 0.177015116 | 0.24335807 | 520 | 520 |
| HESRG     | -0.059303185 | 0.176934237 | 0.24326346 | 520 | 475 |
| ZNF653    | -0.059312769 | 0.176864154 | 0.24318369 | 520 | 520 |
| TCOF1     | -0.059323564 | 0.176785239 | 0.24312328 | 520 | 520 |
| KIAA1524  | -0.059337223 | 0.176685421 | 0.24302079 | 520 | 520 |
| FOXG1     | -0.059341196 | 0.176656393 | 0.24299744 | 520 | 295 |
| C2orf49   | -0.059342721 | 0.176645255 | 0.24299744 | 520 | 520 |
| CECR4     | -0.059367337 | 0.176465508 | 0.24278456 | 520 | 418 |
| SLC44A2   | -0.059380401 | 0.176370161 | 0.24266994 | 520 | 520 |
| FAM9B     | -0.059402451 | 0.176209334 | 0.2424652  | 520 | 26  |
| C5orf56   | -0.05940838  | 0.176166102 | 0.24242225 | 520 | 520 |
| OR2A25    | -0.059414121 | 0.176124254 | 0.24238121 | 520 | 227 |
| KRT17     | -0.059417057 | 0.176102858 | 0.2423683  | 520 | 520 |
| GNAI3     | -0.059436789 | 0.175959086 | 0.24223657 | 520 | 520 |
| OR2AT4    | -0.059450586 | 0.175858611 | 0.24214784 | 520 | 29  |
| FEM1A     | -0.059527687 | 0.175297929 | 0.24144176 | 520 | 520 |
| CAPN3     | -0.059530626 | 0.175276581 | 0.24142885 | 520 | 520 |
| TSPAN14   | -0.059601325 | 0.174763666 | 0.24078815 | 520 | 520 |
| PRH2      | -0.059617304 | 0.174647899 | 0.24064509 | 520 | 500 |
| MOCOS     | -0.059625026 | 0.17459197  | 0.24058447 | 520 | 520 |
| ABCG8     | -0.059634422 | 0.17452394  | 0.24050716 | 520 | 161 |
| C9orf135  | -0.059695761 | 0.174080289 | 0.23997778 | 520 | 105 |
| IRGQ      | -0.059707954 | 0.173992202 | 0.23987274 | 520 | 520 |
| PMAIP1    | -0.059708851 | 0.173985725 | 0.23987274 | 520 | 520 |
| OR4D11    | -0.059708957 | 0.173984961 | 0.23987274 | 520 | 21  |
| LOC145837 | -0.059717567 | 0.173922775 | 0.23982622 | 520 | 441 |
| FKBP8     | -0.059763112 | 0.173594129 | 0.23938941 | 520 | 520 |
| ZNF37B    | -0.059793914 | 0.173372128 | 0.23911598 | 520 | 520 |
| C1orf65   | -0.059804484 | 0.173295997 | 0.23902733 | 520 | 387 |
| TPTE2     | -0.059850272 | 0.17296648  | 0.23860547 | 520 | 307 |

|              |              |             |            |     |     |
|--------------|--------------|-------------|------------|-----|-----|
| CCDC83       | -0.059860625 | 0.172892039 | 0.23851909 | 520 | 72  |
| LOC282997    | -0.059875049 | 0.172788365 | 0.23839238 | 520 | 520 |
| C14orf182    | -0.059890591 | 0.17267671  | 0.23825463 | 520 | 517 |
| CCDC142      | -0.059898    | 0.172623502 | 0.23819752 | 520 | 520 |
| TRPV5        | -0.059939319 | 0.172326989 | 0.23782092 | 520 | 128 |
| DDX4         | -0.059941149 | 0.172313866 | 0.23781908 | 520 | 168 |
| UNK          | -0.059947216 | 0.172270367 | 0.23777532 | 520 | 520 |
| KIAA1841     | -0.059964475 | 0.172146656 | 0.23762084 | 520 | 520 |
| PITPNA       | -0.059974098 | 0.172077708 | 0.23754192 | 520 | 520 |
| DKFZP434H168 | -0.059992154 | 0.171948395 | 0.23737967 | 520 | 29  |
| HIST1H2BE    | -0.060006744 | 0.171843954 | 0.23725173 | 520 | 520 |
| TRIM15       | -0.060007164 | 0.171840953 | 0.23725173 | 520 | 442 |
| C6orf25      | -0.060009101 | 0.171827088 | 0.23725173 | 520 | 429 |
| ACTL6B       | -0.060050154 | 0.171533498 | 0.23687176 | 520 | 83  |
| C3orf74      | -0.060060872 | 0.171456911 | 0.23678222 | 520 | 489 |
| ZNF574       | -0.060066874 | 0.171414037 | 0.23676698 | 520 | 520 |
| HERC2P4      | -0.060104555 | 0.171145029 | 0.23646487 | 520 | 352 |
| SAA2         | -0.060121465 | 0.171024409 | 0.23631441 | 520 | 520 |
| C12orf12     | -0.060140942 | 0.170885566 | 0.23613874 | 520 | 41  |
| TCP10L2      | -0.060153252 | 0.170797849 | 0.23603371 | 520 | 25  |
| FBXO48       | -0.060163934 | 0.170721763 | 0.23594473 | 520 | 520 |
| EME2         | -0.060199401 | 0.170469322 | 0.23562815 | 520 | 520 |
| PC           | -0.060207464 | 0.170411965 | 0.23556501 | 520 | 520 |
| ALPK1        | -0.060222795 | 0.170302964 | 0.23543048 | 520 | 520 |
| ABHD12B      | -0.060255748 | 0.170068832 | 0.23513905 | 520 | 484 |
| KRT31        | -0.060270135 | 0.169966686 | 0.23501394 | 520 | 515 |
| ACTR10       | -0.06031354  | 0.169658809 | 0.23462041 | 520 | 520 |
| PSMA1        | -0.060328081 | 0.169555752 | 0.23454224 | 520 | 520 |
| C19orf51     | -0.060381495 | 0.169177617 | 0.23409947 | 520 | 520 |
| ARL6IP1      | -0.060406555 | 0.16900043  | 0.23387034 | 520 | 520 |
| SERPINI1     | -0.060456012 | 0.168651144 | 0.23341902 | 520 | 520 |
| DNAH8        | -0.060504423 | 0.168309763 | 0.23297852 | 520 | 399 |
| CSMD1        | -0.060570841 | 0.167842257 | 0.23241116 | 520 | 427 |
| ZNF337       | -0.060583462 | 0.167753528 | 0.23230425 | 520 | 520 |
| C13orf1      | -0.06060112  | 0.167629445 | 0.23214836 | 520 | 520 |
| RAD51AP2     | -0.060603051 | 0.16761588  | 0.23214552 | 520 | 507 |
| KRT1         | -0.060640109 | 0.167355716 | 0.23181704 | 520 | 517 |
| LOC255167    | -0.060649176 | 0.167292108 | 0.23174485 | 520 | 460 |
| IL28A        | -0.060650636 | 0.167281869 | 0.23174485 | 520 | 211 |
| JMJD5        | -0.060669362 | 0.167150564 | 0.23158059 | 520 | 520 |
| ROD1         | -0.060685908 | 0.167034606 | 0.23145175 | 520 | 520 |
| KCNJ14       | -0.060690777 | 0.167000498 | 0.23143629 | 520 | 520 |
| SIDT1        | -0.060695094 | 0.166970261 | 0.23141029 | 520 | 519 |
| COPG2        | -0.060705401 | 0.166898079 | 0.23135796 | 520 | 520 |
| LOC100131496 | -0.060710007 | 0.166865825 | 0.23132915 | 520 | 482 |
| CA14         | -0.060715629 | 0.166826469 | 0.23129049 | 520 | 517 |



|           |              |             |            |     |     |
|-----------|--------------|-------------|------------|-----|-----|
| HIGD2B    | -0.060737669 | 0.166672252 | 0.23109257 | 520 | 210 |
| SEBOX     | -0.060755378 | 0.166548415 | 0.23093675 | 520 | 51  |
| SETDB1    | -0.060756924 | 0.166537605 | 0.23093675 | 520 | 520 |
| PLAC1L    | -0.060768052 | 0.166459829 | 0.23084567 | 520 | 10  |
| PAXIP1    | -0.060768625 | 0.166455828 | 0.23084567 | 520 | 520 |
| OR2T10    | -0.060769596 | 0.166449039 | 0.23084567 | 520 | 18  |
| TMSB4Y    | -0.060773729 | 0.166420163 | 0.23083829 | 520 | 384 |
| CDC4A8    | -0.060805384 | 0.166199098 | 0.23057924 | 520 | 520 |
| LCE2C     | -0.060806287 | 0.166192797 | 0.23057924 | 520 | 343 |
| MFSD11    | -0.060848571 | 0.165897863 | 0.23020883 | 520 | 520 |
| SPRR2G    | -0.060853691 | 0.165862174 | 0.23017515 | 520 | 517 |
| C6orf115  | -0.060881398 | 0.165669158 | 0.22992311 | 520 | 520 |
| C21orf88  | -0.060893569 | 0.165584423 | 0.22982133 | 520 | 335 |
| CNPY1     | -0.060932736 | 0.165311966 | 0.22945897 | 520 | 193 |
| FAM36A    | -0.060945519 | 0.165223119 | 0.22935144 | 520 | 520 |
| DSCR9     | -0.060951498 | 0.165181577 | 0.22930956 | 520 | 485 |
| HAVCR1    | -0.060961922 | 0.165109165 | 0.2292406  | 520 | 244 |
| C12orf69  | -0.06096241  | 0.165105772 | 0.2292406  | 520 | 460 |
| HNRPDL    | -0.060986398 | 0.164939228 | 0.22906774 | 520 | 520 |
| DAZAP2    | -0.060993576 | 0.164889414 | 0.22901434 | 520 | 520 |
| FAM113A   | -0.061008845 | 0.164783495 | 0.22889876 | 520 | 520 |
| RAB38     | -0.061045466 | 0.164529666 | 0.22857766 | 520 | 520 |
| F8A1      | -0.061051959 | 0.16448469  | 0.22853092 | 520 | 520 |
| SUPT7L    | -0.061084224 | 0.164261338 | 0.22825206 | 520 | 520 |
| ATAD2B    | -0.061092911 | 0.164201243 | 0.22818428 | 520 | 520 |
| TXNRD2    | -0.061103035 | 0.164131231 | 0.2281027  | 520 | 520 |
| PEX1      | -0.06112368  | 0.163988521 | 0.22792008 | 520 | 520 |
| HACL1     | -0.061161355 | 0.163728337 | 0.22757415 | 520 | 520 |
| LOC646813 | -0.061187858 | 0.163545493 | 0.22736702 | 520 | 15  |
| ACYP2     | -0.061188908 | 0.163538251 | 0.22736702 | 520 | 520 |
| FABP7     | -0.061227412 | 0.163272892 | 0.22705066 | 520 | 420 |
| C2CD2L    | -0.061267879 | 0.162994353 | 0.22670476 | 520 | 520 |
| OR5K2     | -0.061327348 | 0.162585678 | 0.22621982 | 520 | 201 |
| MAP3K14   | -0.061348889 | 0.162437833 | 0.2260453  | 520 | 520 |
| OMP       | -0.061351309 | 0.162421228 | 0.2260378  | 520 | 158 |
| FAM90A1   | -0.061415917 | 0.161978447 | 0.22546827 | 520 | 510 |
| POLR3E    | -0.061424793 | 0.161917683 | 0.22539925 | 520 | 520 |
| ZNF335    | -0.061435894 | 0.16184172  | 0.22532462 | 520 | 520 |
| CCNB1IP1  | -0.061449732 | 0.161747057 | 0.22520837 | 520 | 520 |
| DNMBP     | -0.06149397  | 0.161444724 | 0.22481847 | 520 | 520 |
| DUSP7     | -0.061562001 | 0.16098062  | 0.22423413 | 520 | 520 |
| FRMPD2L1  | -0.0615999   | 0.160722508 | 0.22390553 | 520 | 16  |
| CHRM1     | -0.061645176 | 0.160414567 | 0.22353831 | 520 | 337 |
| ZNF878    | -0.061653629 | 0.160357121 | 0.2234737  | 520 | 448 |
| TSC1      | -0.061653799 | 0.160355971 | 0.2234737  | 520 | 520 |
| ZNF564    | -0.061695641 | 0.160071859 | 0.22312242 | 520 | 520 |

|              |              |             |            |     |     |
|--------------|--------------|-------------|------------|-----|-----|
| LEPROTL1     | -0.061709851 | 0.159975458 | 0.22300347 | 520 | 520 |
| DGKQ         | -0.061726943 | 0.159859558 | 0.2228693  | 520 | 520 |
| SCARNA22     | -0.061759455 | 0.159639282 | 0.222581   | 520 | 13  |
| KRTAP4-5     | -0.061791286 | 0.159423842 | 0.22229599 | 520 | 11  |
| GABARAPL2    | -0.061796915 | 0.159385767 | 0.22225827 | 520 | 520 |
| AVEN         | -0.061826843 | 0.159183437 | 0.22199615 | 520 | 520 |
| IFITM4P      | -0.061827383 | 0.159179787 | 0.22199615 | 520 | 200 |
| PRSS21       | -0.061831353 | 0.159152964 | 0.22199504 | 520 | 489 |
| TMCO1        | -0.061833667 | 0.159137333 | 0.2219886  | 520 | 520 |
| HES3         | -0.061844284 | 0.159065616 | 0.22191926 | 520 | 3   |
| MFSD2A       | -0.061867625 | 0.158908046 | 0.22173011 | 520 | 520 |
| OR11A1       | -0.061881193 | 0.158816503 | 0.22161771 | 520 | 45  |
| CASP3        | -0.061896993 | 0.158709958 | 0.22148436 | 520 | 520 |
| OTUD1        | -0.061915719 | 0.158583744 | 0.22132355 | 520 | 520 |
| MPI          | -0.061920296 | 0.158552908 | 0.22129583 | 520 | 520 |
| PDLIM2       | -0.061927634 | 0.158503474 | 0.22124215 | 520 | 520 |
| ARMC6        | -0.062034149 | 0.157787285 | 0.22033399 | 520 | 520 |
| STAT3        | -0.062070897 | 0.157540762 | 0.22003546 | 520 | 520 |
| LOC100132111 | -0.062076992 | 0.1574999   | 0.21999363 | 520 | 466 |
| ANKRD36      | -0.06208105  | 0.157472702 | 0.21997087 | 520 | 520 |
| KCNK10       | -0.062126598 | 0.157167648 | 0.21957517 | 520 | 514 |
| SLC22A5      | -0.062138663 | 0.157086921 | 0.21950802 | 520 | 520 |
| VTA1         | -0.062167374 | 0.156894937 | 0.21925494 | 520 | 520 |
| LOC100287704 | -0.062199401 | 0.156680989 | 0.21898631 | 520 | 11  |
| GP2          | -0.06220584  | 0.156638001 | 0.2189414  | 520 | 180 |
| S100A13      | -0.06228983  | 0.156078095 | 0.21823443 | 520 | 520 |
| NPIP         | -0.062303848 | 0.155984794 | 0.2181191  | 520 | 520 |
| FBXO5        | -0.062309316 | 0.155948412 | 0.21808335 | 520 | 520 |
| SNTN         | -0.062337851 | 0.15575865  | 0.21786331 | 520 | 221 |
| KIAA1257     | -0.0623593   | 0.155616128 | 0.21767906 | 520 | 517 |
| PISD         | -0.062375132 | 0.15551099  | 0.21754708 | 520 | 520 |
| OR2G6        | -0.062438384 | 0.155091485 | 0.21699033 | 520 | 18  |
| ICA1         | -0.062438757 | 0.155089018 | 0.21699033 | 520 | 520 |
| PLEKHG3      | -0.062449125 | 0.155020333 | 0.21693594 | 520 | 520 |
| ZNF645       | -0.062528504 | 0.154495267 | 0.2162612  | 520 | 41  |
| DNTT         | -0.062531422 | 0.154475991 | 0.21624923 | 520 | 111 |
| REXO1        | -0.062536322 | 0.154443628 | 0.21621893 | 520 | 520 |
| GGT8P        | -0.062575799 | 0.154183067 | 0.21591412 | 520 | 413 |
| C8orf80      | -0.062610909 | 0.153951612 | 0.21561994 | 520 | 498 |
| NEURL4       | -0.062617776 | 0.153906377 | 0.21557156 | 520 | 520 |
| CRTC2        | -0.062686379 | 0.153454987 | 0.21498411 | 520 | 520 |
| CEBPZ        | -0.062693822 | 0.15340607  | 0.21493052 | 520 | 520 |
| MSRA         | -0.062701859 | 0.153353267 | 0.21487147 | 520 | 520 |
| SHROOM2      | -0.062706537 | 0.15332254  | 0.21484334 | 520 | 520 |
| NEK11        | -0.062707976 | 0.153313092 | 0.21484334 | 520 | 520 |
| PCGF3        | -0.062721548 | 0.153223973 | 0.21475    | 520 | 520 |

|            |              |             |            |     |     |
|------------|--------------|-------------|------------|-----|-----|
| C4BPB      | -0.062723998 | 0.153207889 | 0.21474238 | 520 | 322 |
| PPP1R14B   | -0.062771335 | 0.152897388 | 0.21432207 | 520 | 520 |
| TTPA       | -0.062775069 | 0.152872916 | 0.21430266 | 520 | 164 |
| LRRC37A4   | -0.062828215 | 0.15252492  | 0.21385943 | 520 | 519 |
| NCRNA00029 | -0.062882097 | 0.152172722 | 0.21339528 | 520 | 55  |
| OR10X1     | -0.062931372 | 0.151851179 | 0.212974   | 520 | 6   |
| RGNEF      | -0.062968256 | 0.151610833 | 0.2126517  | 520 | 520 |
| TMEM213    | -0.062986537 | 0.151491812 | 0.21249954 | 520 | 251 |
| RNU4ATAC   | -0.062993332 | 0.151447595 | 0.2124523  | 520 | 18  |
| CRIP1      | -0.063005725 | 0.151366966 | 0.21235396 | 520 | 520 |
| ZNF771     | -0.063016317 | 0.151298086 | 0.2123062  | 520 | 520 |
| TBP        | -0.063033568 | 0.151185947 | 0.21220336 | 520 | 520 |
| KRTAP4-12  | -0.063058316 | 0.151025186 | 0.21200723 | 520 | 49  |
| C20orf79   | -0.063062892 | 0.150995475 | 0.21198028 | 520 | 8   |
| MAPKAP1    | -0.063082136 | 0.150870573 | 0.21181968 | 520 | 520 |
| RIC3       | -0.063087229 | 0.150837536 | 0.21178804 | 520 | 505 |
| OR1D2      | -0.063096246 | 0.15077905  | 0.21172153 | 520 | 33  |
| CELSR2     | -0.063129186 | 0.150565538 | 0.21146504 | 520 | 520 |
| EIF3H      | -0.063131044 | 0.150553503 | 0.21146286 | 520 | 520 |
| LRPPRC     | -0.063171773 | 0.150289839 | 0.21112194 | 520 | 520 |
| CBFA2T2    | -0.06318203  | 0.150223499 | 0.21104345 | 520 | 520 |
| CWH43      | -0.063190359 | 0.150169638 | 0.21098248 | 520 | 481 |
| RRP7A      | -0.063194141 | 0.150145189 | 0.21096283 | 520 | 520 |
| OPALIN     | -0.063199037 | 0.150113542 | 0.21093306 | 520 | 80  |
| SLC9A2     | -0.063271771 | 0.149643985 | 0.21031723 | 520 | 511 |
| OR5I1      | -0.063284629 | 0.149561095 | 0.21021539 | 520 | 7   |
| PDIA2      | -0.063285798 | 0.149553558 | 0.21021539 | 520 | 465 |
| PAX6       | -0.06330116  | 0.149454573 | 0.2101096  | 520 | 519 |
| C9orf116   | -0.063302478 | 0.149446087 | 0.2101096  | 520 | 520 |
| IFFO2      | -0.063303785 | 0.149437663 | 0.2101096  | 520 | 520 |
| IGLL3      | -0.063381163 | 0.14893988  | 0.20947365 | 520 | 170 |
| DPY19L2P4  | -0.063402028 | 0.148805872 | 0.20931438 | 520 | 243 |
| SPCS2      | -0.06340561  | 0.14878287  | 0.20929662 | 520 | 520 |
| TTC23L     | -0.063448788 | 0.148505873 | 0.2089507  | 520 | 427 |
| C17orf79   | -0.063451934 | 0.148485702 | 0.20893689 | 520 | 520 |
| MLLT10     | -0.063457631 | 0.148449188 | 0.20890009 | 520 | 520 |
| SMCR5      | -0.063463383 | 0.148412328 | 0.2088628  | 520 | 270 |
| GPI        | -0.063466313 | 0.148393557 | 0.20885096 | 520 | 520 |
| RFPL1S     | -0.063467327 | 0.148387062 | 0.20885096 | 520 | 470 |
| KRT20      | -0.06351124  | 0.148105917 | 0.20848979 | 520 | 277 |
| ANKRD29    | -0.063570924 | 0.147724462 | 0.2080109  | 520 | 520 |
| ABCB11     | -0.06357477  | 0.147699908 | 0.20799085 | 520 | 404 |
| GDEP       | -0.063582332 | 0.147651632 | 0.20793739 | 520 | 31  |
| SPDEF      | -0.063595902 | 0.147565044 | 0.20784439 | 520 | 506 |
| PMM1       | -0.063609982 | 0.147475236 | 0.20773249 | 520 | 520 |
| HIST1H2BL  | -0.063614898 | 0.147443888 | 0.20770285 | 520 | 495 |

|           |              |             |            |     |     |
|-----------|--------------|-------------|------------|-----|-----|
| CHERP     | -0.063629553 | 0.147350476 | 0.20758576 | 520 | 520 |
| PDLIM1    | -0.063646286 | 0.147243871 | 0.20747907 | 520 | 520 |
| KRTAP1-3  | -0.063646905 | 0.147239927 | 0.20747907 | 520 | 51  |
| TMEM60    | -0.063648006 | 0.147232916 | 0.20747907 | 520 | 520 |
| VLDLR     | -0.063707943 | 0.146851566 | 0.2069986  | 520 | 520 |
| NTF4      | -0.063713887 | 0.146813783 | 0.20695981 | 520 | 518 |
| DUXA      | -0.063749448 | 0.146587927 | 0.20669923 | 520 | 175 |
| MMEL1     | -0.063791236 | 0.146322863 | 0.2063399  | 520 | 448 |
| WDR70     | -0.063812849 | 0.146185908 | 0.20617561 | 520 | 520 |
| NEU4      | -0.063814242 | 0.146177088 | 0.20617561 | 520 | 477 |
| SGSH      | -0.063816693 | 0.146161562 | 0.20617011 | 520 | 520 |
| CCDC37    | -0.063885428 | 0.145726728 | 0.20562867 | 520 | 155 |
| ADAM20    | -0.063890771 | 0.145692966 | 0.20560981 | 520 | 466 |
| VCX3A     | -0.063893009 | 0.145678828 | 0.20560425 | 520 | 359 |
| CASC2     | -0.06390433  | 0.14560732  | 0.20551771 | 520 | 517 |
| FAM83A    | -0.06390697  | 0.145590652 | 0.20550857 | 520 | 520 |
| LOC732275 | -0.063943446 | 0.14536046  | 0.20522674 | 520 | 115 |
| CCDC39    | -0.06395989  | 0.145256779 | 0.20509472 | 520 | 510 |
| PRPF38B   | -0.063971973 | 0.145180626 | 0.20500155 | 520 | 520 |
| SNORA22   | -0.06400453  | 0.144975595 | 0.20472637 | 520 | 14  |
| GZMA      | -0.06403777  | 0.14476649  | 0.20444541 | 520 | 520 |
| C19orf41  | -0.064046371 | 0.144712421 | 0.20438336 | 520 | 61  |
| GPX1      | -0.064090747 | 0.144433706 | 0.20403259 | 520 | 520 |
| ERICH1    | -0.06409296  | 0.144419815 | 0.20402727 | 520 | 520 |
| C10orf76  | -0.064093236 | 0.144418088 | 0.20402727 | 520 | 520 |
| SLC37A1   | -0.064126672 | 0.144208371 | 0.2037571  | 520 | 520 |
| QRSL1     | -0.064152074 | 0.144049196 | 0.20356072 | 520 | 520 |
| LIPN      | -0.064190538 | 0.143808434 | 0.20329656 | 520 | 409 |
| ATP2C2    | -0.064237417 | 0.143515419 | 0.2029202  | 520 | 520 |
| WARS      | -0.064239429 | 0.143502852 | 0.2029202  | 520 | 520 |
| AGXT2L2   | -0.064273707 | 0.143288897 | 0.20267097 | 520 | 520 |
| CHMP1B    | -0.064301106 | 0.143118059 | 0.20245773 | 520 | 520 |
| FAM115C   | -0.06430139  | 0.143116288 | 0.20245773 | 520 | 520 |
| DNAJA4    | -0.064307738 | 0.143076726 | 0.20242767 | 520 | 520 |
| DDIT3     | -0.064311993 | 0.143050219 | 0.20240437 | 520 | 520 |
| MYEOV     | -0.064352316 | 0.142799169 | 0.20210588 | 520 | 520 |
| OR6B3     | -0.064360881 | 0.142745888 | 0.20205883 | 520 | 59  |
| CLIP1     | -0.064426271 | 0.142339601 | 0.20154032 | 520 | 520 |
| KCNK18    | -0.064437553 | 0.142269589 | 0.20145534 | 520 | 17  |
| MDP1      | -0.064472129 | 0.1420552   | 0.20116589 | 520 | 520 |
| PGAM1     | -0.064498901 | 0.141889368 | 0.20095928 | 520 | 520 |
| DNAJA1    | -0.064499121 | 0.141888006 | 0.20095928 | 520 | 520 |
| PRR21     | -0.064554402 | 0.141546056 | 0.20051529 | 520 | 62  |
| NPPA      | -0.064558977 | 0.141517785 | 0.20048933 | 520 | 356 |
| CNNM3     | -0.064580366 | 0.14138567  | 0.20033031 | 520 | 520 |
| KIF2B     | -0.064583657 | 0.141365352 | 0.20032968 | 520 | 33  |

|            |              |             |            |     |     |
|------------|--------------|-------------|------------|-----|-----|
| CIT        | -0.064647159 | 0.140973712 | 0.19978872 | 520 | 520 |
| TXNDC6     | -0.064676156 | 0.140795154 | 0.19957775 | 520 | 484 |
| CDK4       | -0.064712193 | 0.14057349  | 0.19930557 | 520 | 520 |
| IMMP2L     | -0.064717767 | 0.140539222 | 0.199271   | 520 | 520 |
| WDR27      | -0.064756175 | 0.140303311 | 0.19895049 | 520 | 520 |
| NCRNA00107 | -0.064811964 | 0.139961182 | 0.19852119 | 520 | 503 |
| NAPSA      | -0.064818705 | 0.139919884 | 0.19847658 | 520 | 508 |
| MRPL15     | -0.06485564  | 0.139693781 | 0.19816979 | 520 | 520 |
| LOC149134  | -0.064858636 | 0.139675457 | 0.19815774 | 520 | 469 |
| UBAP1      | -0.064913996 | 0.139337117 | 0.19771947 | 520 | 520 |
| APOBEC1    | -0.064927628 | 0.139253905 | 0.1976153  | 520 | 47  |
| PTH2R      | -0.064941286 | 0.139170566 | 0.19752483 | 520 | 373 |
| GALT       | -0.064966203 | 0.139018628 | 0.19733697 | 520 | 520 |
| N4BP2L2    | -0.064990999 | 0.138867556 | 0.19715028 | 520 | 520 |
| FCER2      | -0.06499492  | 0.138843681 | 0.19713026 | 520 | 439 |
| SNORA40    | -0.065003539 | 0.138791202 | 0.19706963 | 520 | 110 |
| SLC7A13    | -0.065015722 | 0.138717055 | 0.19700246 | 520 | 34  |
| RRP15      | -0.065018318 | 0.13870126  | 0.19699741 | 520 | 520 |
| SETMAR     | -0.065045975 | 0.138533058 | 0.19677237 | 520 | 520 |
| C11orf65   | -0.065048532 | 0.13851752  | 0.19676416 | 520 | 519 |
| OTUB2      | -0.065053763 | 0.138485723 | 0.19673285 | 520 | 520 |
| GTF2F1     | -0.065106872 | 0.138163262 | 0.19633009 | 520 | 520 |
| CAMP       | -0.065107335 | 0.138160452 | 0.19633009 | 520 | 471 |
| L3MBTL2    | -0.065157534 | 0.137856194 | 0.19592136 | 520 | 520 |
| SNORD89    | -0.065161692 | 0.137831011 | 0.19589938 | 520 | 21  |
| TNK1       | -0.065170354 | 0.137778573 | 0.19583865 | 520 | 520 |
| LOC401127  | -0.065193363 | 0.137639342 | 0.19566834 | 520 | 517 |
| SMARCE1    | -0.065240498 | 0.137354469 | 0.19530425 | 520 | 520 |
| ZNF20      | -0.065248738 | 0.137304717 | 0.19524769 | 520 | 520 |
| LOC645332  | -0.065252378 | 0.137282742 | 0.19523021 | 520 | 520 |
| FAM129C    | -0.065302174 | 0.136982392 | 0.19485806 | 520 | 474 |
| OTX1       | -0.065331211 | 0.13680749  | 0.19463672 | 520 | 520 |
| HGFAC      | -0.06534287  | 0.136737315 | 0.19456434 | 520 | 358 |
| OR8B2      | -0.065370613 | 0.136570433 | 0.19435431 | 520 | 25  |
| FABP2      | -0.065386353 | 0.136475819 | 0.19426079 | 520 | 105 |
| ASPM       | -0.065388716 | 0.136461618 | 0.19425429 | 520 | 520 |
| UNC45A     | -0.065406183 | 0.136356694 | 0.19411864 | 520 | 520 |
| OR11G2     | -0.065415971 | 0.136297928 | 0.19404868 | 520 | 18  |
| OR10G3     | -0.065430315 | 0.136211835 | 0.1939535  | 520 | 48  |
| BYSL       | -0.065431952 | 0.136202015 | 0.1939535  | 520 | 520 |
| FLG        | -0.065449149 | 0.136098864 | 0.1938337  | 520 | 520 |
| OBFC2A     | -0.065481388 | 0.135905651 | 0.19357477 | 520 | 520 |
| CRISP1     | -0.065486344 | 0.135875965 | 0.19355726 | 520 | 33  |
| BCORL2     | -0.065487542 | 0.135868792 | 0.19355726 | 520 | 292 |
| OR2T3      | -0.065505137 | 0.135763451 | 0.19342431 | 520 | 39  |
| AHSA1      | -0.065528014 | 0.13562658  | 0.19324296 | 520 | 520 |

|              |              |             |            |     |     |
|--------------|--------------|-------------|------------|-----|-----|
| OR10AG1      | -0.065528048 | 0.13562638  | 0.19324296 | 520 | 7   |
| OR2T35       | -0.065585768 | 0.135281527 | 0.19281945 | 520 | 4   |
| EML5         | -0.065588296 | 0.135266435 | 0.19281156 | 520 | 520 |
| HSD17B2      | -0.065624219 | 0.135052173 | 0.19251976 | 520 | 519 |
| DERL2        | -0.065640437 | 0.134955523 | 0.19239559 | 520 | 520 |
| LOC401010    | -0.065657821 | 0.134851988 | 0.19226158 | 520 | 520 |
| ATP6V1A      | -0.06567044  | 0.134776871 | 0.19218166 | 520 | 520 |
| EEF1A1       | -0.06569221  | 0.134647349 | 0.19206488 | 520 | 520 |
| ASCL3        | -0.065694334 | 0.13463472  | 0.19206045 | 520 | 133 |
| HIST1H4C     | -0.065706876 | 0.134560154 | 0.19196766 | 520 | 427 |
| CBWD5        | -0.065708707 | 0.134549266 | 0.19196571 | 520 | 275 |
| NR2C1        | -0.065745243 | 0.134332241 | 0.1916832  | 520 | 520 |
| TNP2         | -0.065748467 | 0.134313101 | 0.19166945 | 520 | 13  |
| DCDC2B       | -0.065753552 | 0.134282918 | 0.19163994 | 520 | 147 |
| PPP1R1C      | -0.065861238 | 0.133645002 | 0.1908163  | 520 | 515 |
| LOC100287718 | -0.065885481 | 0.133501716 | 0.19064333 | 520 | 100 |
| VHLL         | -0.065899    | 0.133421858 | 0.19058645 | 520 | 134 |
| KRTAP4-2     | -0.065907375 | 0.133372411 | 0.19052932 | 520 | 63  |
| C10orf53     | -0.065957759 | 0.133075216 | 0.19015865 | 520 | 64  |
| ING3         | -0.065957878 | 0.133074514 | 0.19015865 | 520 | 520 |
| ZNF565       | -0.066038057 | 0.132602626 | 0.18959082 | 520 | 520 |
| TRAPPC4      | -0.066109021 | 0.132186051 | 0.18904884 | 520 | 520 |
| GTF2F2       | -0.066162413 | 0.131873295 | 0.18864168 | 520 | 520 |
| CDC42EP1     | -0.06617095  | 0.131823338 | 0.1885836  | 520 | 520 |
| HIST1H2AA    | -0.066191951 | 0.131700512 | 0.18842125 | 520 | 6   |
| RPRM         | -0.066248568 | 0.131369825 | 0.18802819 | 520 | 475 |
| OR6Y1        | -0.066250516 | 0.131358459 | 0.18802527 | 520 | 13  |
| PAX2         | -0.066259225 | 0.131307654 | 0.18796589 | 520 | 231 |
| AP4B1        | -0.066266419 | 0.131265696 | 0.18791917 | 520 | 520 |
| EEF1D        | -0.066281279 | 0.131179062 | 0.18780848 | 520 | 520 |
| STX5         | -0.066356013 | 0.130744029 | 0.18723882 | 520 | 520 |
| PLGLB2       | -0.066397856 | 0.130500944 | 0.18690397 | 520 | 517 |
| AMAC1        | -0.066420043 | 0.130372196 | 0.18673514 | 520 | 262 |
| LOC100101938 | -0.066457066 | 0.130157568 | 0.18647841 | 520 | 255 |
| TSEN15       | -0.066477712 | 0.130037999 | 0.18633359 | 520 | 520 |
| CAPS         | -0.066480149 | 0.130023893 | 0.18632661 | 520 | 520 |
| OR13G1       | -0.06648041  | 0.130022378 | 0.18632661 | 520 | 10  |
| C1orf158     | -0.066526948 | 0.129753201 | 0.18599158 | 520 | 106 |
| RNASE7       | -0.066599439 | 0.129334761 | 0.18545908 | 520 | 519 |
| C8orf86      | -0.06660911  | 0.129279018 | 0.18540413 | 520 | 63  |
| LOC26102     | -0.066686203 | 0.128835309 | 0.18480723 | 520 | 299 |
| GLB1L3       | -0.066753655 | 0.128448061 | 0.18427796 | 520 | 440 |
| HBEGF        | -0.06676032  | 0.128409849 | 0.18423625 | 520 | 520 |
| THEM4        | -0.066763338 | 0.128392545 | 0.18422453 | 520 | 520 |
| USP43        | -0.066786293 | 0.12826101  | 0.18404889 | 520 | 520 |
| DTWD2        | -0.066795591 | 0.12820776  | 0.18398557 | 520 | 520 |

|           |              |             |            |     |     |
|-----------|--------------|-------------|------------|-----|-----|
| NLRP14    | -0.066814152 | 0.128101514 | 0.18384619 | 520 | 311 |
| VWA3A     | -0.06683853  | 0.12796207  | 0.18365913 | 520 | 306 |
| SYCE1L    | -0.066861828 | 0.127828916 | 0.18350506 | 520 | 518 |
| FAM110C   | -0.066898165 | 0.127621452 | 0.18327277 | 520 | 517 |
| TTLL3     | -0.06690989  | 0.12755457  | 0.18319162 | 520 | 520 |
| COBLL1    | -0.066910304 | 0.127552206 | 0.18319162 | 520 | 520 |
| C1QTNF8   | -0.066926468 | 0.127460044 | 0.18308194 | 520 | 112 |
| RAD23B    | -0.066934639 | 0.127413476 | 0.18302809 | 520 | 520 |
| CCDC106   | -0.066946935 | 0.127343419 | 0.18294049 | 520 | 520 |
| CST9L     | -0.067035277 | 0.126840985 | 0.18225765 | 520 | 109 |
| TAAR2     | -0.067043598 | 0.12679374  | 0.18220275 | 520 | 5   |
| HAPLN2    | -0.067106284 | 0.126438256 | 0.18175668 | 520 | 302 |
| C3orf66   | -0.067113097 | 0.126399667 | 0.18171417 | 520 | 56  |
| HADHA     | -0.067120942 | 0.126355243 | 0.18166325 | 520 | 520 |
| C8orf47   | -0.067125852 | 0.126327448 | 0.18163624 | 520 | 465 |
| C11orf93  | -0.067196302 | 0.125929129 | 0.18109499 | 520 | 515 |
| CALB1     | -0.067225469 | 0.125764507 | 0.18089133 | 520 | 484 |
| CYP1A1    | -0.067300033 | 0.125344424 | 0.1803257  | 520 | 380 |
| CDC23     | -0.067336202 | 0.125141043 | 0.18004595 | 520 | 520 |
| C20orf185 | -0.067346446 | 0.125083488 | 0.17997598 | 520 | 51  |
| WAC       | -0.067384814 | 0.1248681   | 0.1796789  | 520 | 520 |
| DUSP1     | -0.06740096  | 0.124777544 | 0.1795614  | 520 | 520 |
| LYRM2     | -0.067410446 | 0.124724372 | 0.1794977  | 520 | 520 |
| FAM43A    | -0.067416888 | 0.124688267 | 0.17945854 | 520 | 520 |
| MPDU1     | -0.067419335 | 0.124674558 | 0.17945162 | 520 | 520 |
| C22orf42  | -0.06746261  | 0.124432261 | 0.17912844 | 520 | 17  |
| SLC6A16   | -0.067525579 | 0.124080354 | 0.17864736 | 520 | 503 |
| PQLC2     | -0.067527942 | 0.124067166 | 0.17864113 | 520 | 520 |
| OR2T6     | -0.067549553 | 0.12394658  | 0.17849299 | 520 | 7   |
| C12orf71  | -0.067559229 | 0.12389262  | 0.17843282 | 520 | 290 |
| GBA3      | -0.067629488 | 0.123501346 | 0.17794077 | 520 | 308 |
| MBTD1     | -0.067662149 | 0.123319788 | 0.17769188 | 520 | 520 |
| RC3H1     | -0.067673487 | 0.123256805 | 0.17761382 | 520 | 520 |
| IRAK4     | -0.067713295 | 0.123035885 | 0.17734617 | 520 | 520 |
| ELP3      | -0.067714935 | 0.123026792 | 0.17734574 | 520 | 520 |
| PLA2G2F   | -0.067719014 | 0.123004174 | 0.17732581 | 520 | 499 |
| C4orf51   | -0.067721753 | 0.122988985 | 0.17731659 | 520 | 110 |
| INTS5     | -0.067751172 | 0.122825967 | 0.17710689 | 520 | 520 |
| FAM71C    | -0.067765274 | 0.122747882 | 0.17700696 | 520 | 45  |
| DBX2      | -0.067875554 | 0.122138592 | 0.17622916 | 520 | 270 |
| SDF2      | -0.067877767 | 0.122126387 | 0.17622416 | 520 | 520 |
| CHST2     | -0.067878156 | 0.122124241 | 0.17622416 | 520 | 520 |
| NR1H2     | -0.067887225 | 0.122074248 | 0.17617414 | 520 | 520 |
| CEACAM22P | -0.067916343 | 0.121913829 | 0.17596782 | 520 | 253 |
| NT5C3L    | -0.067927416 | 0.121852872 | 0.17589243 | 520 | 520 |
| SNORA38   | -0.067944127 | 0.121760919 | 0.17578486 | 520 | 16  |

|           |              |             |            |     |     |
|-----------|--------------|-------------|------------|-----|-----|
| SRY       | -0.067953899 | 0.12170717  | 0.17571985 | 520 | 272 |
| RBM25     | -0.068002731 | 0.121438872 | 0.17535759 | 520 | 520 |
| TRMT5     | -0.068020239 | 0.121342791 | 0.17524395 | 520 | 520 |
| LOC728606 | -0.068020824 | 0.12133958  | 0.17524395 | 520 | 184 |
| TNP1      | -0.068088046 | 0.120971226 | 0.17477191 | 520 | 17  |
| SNORA46   | -0.068094552 | 0.120935624 | 0.17474353 | 520 | 31  |
| ZFAND2A   | -0.068132697 | 0.120727042 | 0.17446889 | 520 | 520 |
| SLC4A1AP  | -0.068138716 | 0.120694153 | 0.17445713 | 520 | 520 |
| GCNT7     | -0.068146399 | 0.120652185 | 0.17440897 | 520 | 274 |
| BRSK2     | -0.068153174 | 0.120615185 | 0.17436798 | 520 | 478 |
| RNF31     | -0.068225135 | 0.120222737 | 0.17385049 | 520 | 520 |
| KIF13B    | -0.06825185  | 0.1200773   | 0.17367661 | 520 | 520 |
| WDR92     | -0.068290335 | 0.119868021 | 0.17341217 | 520 | 520 |
| ZCRB1     | -0.068303957 | 0.11979402  | 0.17331754 | 520 | 520 |
| DCAF12    | -0.068307785 | 0.119773229 | 0.1732999  | 520 | 520 |
| LOC645323 | -0.0683286   | 0.119660229 | 0.17316125 | 520 | 282 |
| NPLOC4    | -0.068395793 | 0.119296023 | 0.17267138 | 520 | 520 |
| RBP2      | -0.068413617 | 0.119199557 | 0.17255653 | 520 | 91  |
| FAM50A    | -0.06846815  | 0.118904792 | 0.17215498 | 520 | 520 |
| PRKAR1B   | -0.068469455 | 0.118897743 | 0.17215498 | 520 | 520 |
| EXOC6     | -0.068509392 | 0.118682247 | 0.17188169 | 520 | 520 |
| ZBPB      | -0.068522413 | 0.118612053 | 0.17179237 | 520 | 39  |
| PNLDC1    | -0.06853626  | 0.118537442 | 0.17170898 | 520 | 479 |
| RNF34     | -0.068550918 | 0.118458504 | 0.17160696 | 520 | 520 |
| GPCPD1    | -0.068562474 | 0.118396294 | 0.17152916 | 520 | 520 |
| TNNI3     | -0.068575452 | 0.118326466 | 0.17144031 | 520 | 475 |
| VCP       | -0.068625977 | 0.118054915 | 0.17109605 | 520 | 520 |
| MT1X      | -0.068655993 | 0.117893823 | 0.17087486 | 520 | 520 |
| GPR55     | -0.068675447 | 0.117789503 | 0.17073593 | 520 | 518 |
| STEAP4    | -0.068719567 | 0.117553191 | 0.17040565 | 520 | 520 |
| OPN5      | -0.068744501 | 0.117419808 | 0.17023677 | 520 | 161 |
| AAAS      | -0.068772219 | 0.117271671 | 0.17004645 | 520 | 520 |
| KIAA0528  | -0.068791437 | 0.117169042 | 0.16992208 | 520 | 520 |
| TBCD      | -0.068792061 | 0.117165711 | 0.16992208 | 520 | 520 |
| HK2       | -0.068812529 | 0.117056494 | 0.16978328 | 520 | 520 |
| CEACAM3   | -0.068819885 | 0.117017259 | 0.16973858 | 520 | 506 |
| FSTL4     | -0.068846573 | 0.116875006 | 0.16956152 | 520 | 515 |
| TAS2R9    | -0.06899346  | 0.116094479 | 0.16854554 | 520 | 19  |
| ZNF596    | -0.069058947 | 0.115747817 | 0.16807857 | 520 | 520 |
| FBXL17    | -0.069078558 | 0.115644161 | 0.16796433 | 520 | 520 |
| NOTCH2NL  | -0.069080846 | 0.11563207  | 0.16795887 | 520 | 520 |
| WIPI2     | -0.069125798 | 0.115394766 | 0.16765041 | 520 | 520 |
| TMEM218   | -0.069140098 | 0.115319359 | 0.16756261 | 520 | 520 |
| IFNA10    | -0.069143214 | 0.115302933 | 0.16755321 | 520 | 12  |
| PNP       | -0.06917919  | 0.115113406 | 0.16732603 | 520 | 520 |
| OR4C16    | -0.069188403 | 0.115064912 | 0.1672676  | 520 | 11  |



|              |              |             |            |     |     |
|--------------|--------------|-------------|------------|-----|-----|
| PAN2         | -0.069200654 | 0.115000448 | 0.16718594 | 520 | 520 |
| TIMM22       | -0.069219943 | 0.114899013 | 0.16705052 | 520 | 520 |
| HDAC10       | -0.069226249 | 0.114865865 | 0.16701437 | 520 | 520 |
| FAM81B       | -0.069238138 | 0.11480339  | 0.16694761 | 520 | 206 |
| ASCL4        | -0.069243059 | 0.11477754  | 0.16692206 | 520 | 324 |
| RLN3         | -0.069256193 | 0.114708569 | 0.16683378 | 520 | 48  |
| TIGD5        | -0.069262854 | 0.114673603 | 0.16679792 | 520 | 520 |
| OR51G2       | -0.069268501 | 0.114643964 | 0.16677591 | 520 | 6   |
| DEFB124      | -0.06930732  | 0.114440391 | 0.16652782 | 520 | 49  |
| ANP32E       | -0.069326432 | 0.114340269 | 0.16640615 | 520 | 520 |
| KCNJ4        | -0.069370185 | 0.114111317 | 0.16610891 | 520 | 338 |
| CD3D         | -0.069391382 | 0.114000528 | 0.1659716  | 520 | 520 |
| IL4R         | -0.069426642 | 0.113816418 | 0.16571676 | 520 | 520 |
| TBC1D2       | -0.069439311 | 0.113750327 | 0.16565518 | 520 | 520 |
| GZMM         | -0.069444162 | 0.113725028 | 0.16564226 | 520 | 516 |
| ST6GALNAC2   | -0.069445871 | 0.113716112 | 0.16564124 | 520 | 520 |
| OR5AK2       | -0.069507474 | 0.113395244 | 0.16520966 | 520 | 9   |
| LOC339568    | -0.069523602 | 0.113311354 | 0.16509937 | 520 | 9   |
| GABRA6       | -0.069563308 | 0.113105035 | 0.16481066 | 520 | 35  |
| DCAF10       | -0.069568184 | 0.113079719 | 0.16478568 | 520 | 520 |
| KCTD2        | -0.069577183 | 0.11303301  | 0.16472952 | 520 | 520 |
| MFN2         | -0.069578598 | 0.113025664 | 0.16472952 | 520 | 520 |
| GDPD4        | -0.069596084 | 0.112934947 | 0.1646223  | 520 | 295 |
| CLK2P        | -0.069622767 | 0.112796628 | 0.16443256 | 520 | 520 |
| TPH1         | -0.069740266 | 0.112189117 | 0.1635706  | 520 | 396 |
| TMEM63C      | -0.069770166 | 0.112034935 | 0.16339306 | 520 | 520 |
| C9orf82      | -0.06978254  | 0.111971177 | 0.1633237  | 520 | 519 |
| CITED4       | -0.069799902 | 0.111881764 | 0.16320508 | 520 | 520 |
| GTF2IRD2     | -0.069840677 | 0.111672    | 0.16292267 | 520 | 520 |
| SLC17A3      | -0.069853502 | 0.111606083 | 0.16283828 | 520 | 98  |
| HOXA7        | -0.069883047 | 0.111454355 | 0.16264357 | 520 | 513 |
| IL10RB       | -0.069934116 | 0.111192473 | 0.16230527 | 520 | 520 |
| OR2G3        | -0.069954674 | 0.111087185 | 0.16216332 | 520 | 23  |
| SAA1         | -0.069962694 | 0.111046136 | 0.16211514 | 520 | 520 |
| HJURP        | -0.069984861 | 0.110932727 | 0.1619613  | 520 | 520 |
| LOC150197    | -0.069984881 | 0.110932625 | 0.1619613  | 520 | 457 |
| FLG2         | -0.069989    | 0.110911563 | 0.16195385 | 520 | 455 |
| AKAP14       | -0.070032098 | 0.110691374 | 0.16164404 | 520 | 194 |
| COPS7B       | -0.070092925 | 0.110381185 | 0.16120274 | 520 | 520 |
| ACBD5        | -0.070101847 | 0.110335749 | 0.16115973 | 520 | 520 |
| C16orf92     | -0.070109871 | 0.110294895 | 0.16111173 | 520 | 66  |
| SLC6A4       | -0.070142886 | 0.110126927 | 0.16090134 | 520 | 480 |
| LOC100134368 | -0.070157994 | 0.110050128 | 0.16082409 | 520 | 449 |
| FAM163B      | -0.070223415 | 0.109718069 | 0.16035331 | 520 | 188 |
| NEFH         | -0.070242516 | 0.109621266 | 0.1602322  | 520 | 518 |
| TMEM14C      | -0.070246094 | 0.109603139 | 0.16022893 | 520 | 520 |

|            |              |             |            |     |     |
|------------|--------------|-------------|------------|-----|-----|
| DDX31      | -0.070253476 | 0.109565752 | 0.16020912 | 520 | 520 |
| MYPOP      | -0.070258704 | 0.109539279 | 0.16018203 | 520 | 520 |
| DENND1A    | -0.070269754 | 0.109483339 | 0.16011184 | 520 | 520 |
| C11orf67   | -0.070276261 | 0.109450411 | 0.16008691 | 520 | 520 |
| C14orf166B | -0.070287419 | 0.109393966 | 0.16001595 | 520 | 100 |
| RPE65      | -0.070310233 | 0.109278619 | 0.15987043 | 520 | 343 |
| LOC730811  | -0.070318639 | 0.109236144 | 0.15981988 | 520 | 30  |
| CLN8       | -0.070358314 | 0.109035848 | 0.15953841 | 520 | 520 |
| OR11L1     | -0.07035974  | 0.109028655 | 0.15953841 | 520 | 21  |
| DPPA5      | -0.070364601 | 0.109004132 | 0.15951515 | 520 | 40  |
| NAT9       | -0.070370835 | 0.108972696 | 0.15948073 | 520 | 520 |
| ASNS       | -0.070379223 | 0.108930403 | 0.15944197 | 520 | 520 |
| MPV17L2    | -0.070379784 | 0.108927578 | 0.15944197 | 520 | 520 |
| CNTD2      | -0.070397411 | 0.108838749 | 0.15934252 | 520 | 512 |
| LYRM4      | -0.0704308   | 0.108670648 | 0.15913108 | 520 | 520 |
| PRICKLE3   | -0.070456483 | 0.108541487 | 0.15897611 | 520 | 520 |
| MANEAL     | -0.070482404 | 0.10841125  | 0.15880889 | 520 | 520 |
| ZNF711     | -0.07050877  | 0.1082789   | 0.15863807 | 520 | 520 |
| OTOR       | -0.070520037 | 0.108222383 | 0.15856679 | 520 | 38  |
| C1orf122   | -0.07052433  | 0.108200854 | 0.15854676 | 520 | 520 |
| NPHS2      | -0.07054623  | 0.108091084 | 0.15839743 | 520 | 76  |
| DGCR6      | -0.070573081 | 0.107956621 | 0.15821414 | 520 | 520 |
| FAM177B    | -0.070577819 | 0.107932907 | 0.15820013 | 520 | 311 |
| EIF5       | -0.070583969 | 0.107902134 | 0.15816652 | 520 | 520 |
| RBM11      | -0.070599985 | 0.107822022 | 0.15806058 | 520 | 476 |
| C14orf109  | -0.070634019 | 0.107651942 | 0.1578342  | 520 | 520 |
| ZNF586     | -0.07064275  | 0.107608341 | 0.15778175 | 520 | 520 |
| SLC26A4    | -0.07066294  | 0.107507576 | 0.15764546 | 520 | 514 |
| C14orf72   | -0.070682252 | 0.107411263 | 0.15752714 | 520 | 515 |
| ETNK2      | -0.070688427 | 0.107380485 | 0.15749346 | 520 | 520 |
| PFDN4      | -0.070733129 | 0.107157858 | 0.15720124 | 520 | 520 |
| COX11      | -0.070734233 | 0.107152363 | 0.15720124 | 520 | 520 |
| UMODL1     | -0.070739516 | 0.107126078 | 0.15717749 | 520 | 410 |
| BDNFOS     | -0.070741981 | 0.107113817 | 0.15717094 | 520 | 517 |
| CD55       | -0.070757312 | 0.107037575 | 0.15707049 | 520 | 520 |
| ADRB1      | -0.070774867 | 0.106950324 | 0.15696531 | 520 | 505 |
| ACCS       | -0.070815014 | 0.106750997 | 0.15668417 | 520 | 520 |
| C7orf33    | -0.070831507 | 0.106669199 | 0.15657551 | 520 | 101 |
| CDRT4      | -0.070841033 | 0.106621976 | 0.15652898 | 520 | 520 |
| SCARNA9    | -0.070852293 | 0.106566175 | 0.15646984 | 520 | 489 |
| ACOT11     | -0.070871709 | 0.106470017 | 0.15635143 | 520 | 520 |
| OR4D2      | -0.070871714 | 0.10646999  | 0.15635143 | 520 | 7   |
| KIAA0649   | -0.070935732 | 0.10615342  | 0.15595465 | 520 | 520 |
| TCEB3      | -0.070937456 | 0.106144901 | 0.1559535  | 520 | 520 |
| TTC35      | -0.070949782 | 0.106084039 | 0.15587543 | 520 | 520 |
| LOC649330  | -0.070966597 | 0.106001055 | 0.15576485 | 520 | 514 |

|            |              |             |            |     |     |
|------------|--------------|-------------|------------|-----|-----|
| DHX58      | -0.070972745 | 0.105970724 | 0.15573834 | 520 | 520 |
| OR4F6      | -0.070976935 | 0.105950058 | 0.15572396 | 520 | 10  |
| HLA-DOB    | -0.070980635 | 0.105931816 | 0.15570849 | 520 | 520 |
| TMCO5A     | -0.070985188 | 0.105909366 | 0.15568684 | 520 | 60  |
| LOC647859  | -0.070991532 | 0.105878093 | 0.15565222 | 520 | 304 |
| LOC390595  | -0.071029412 | 0.105691505 | 0.15538925 | 520 | 511 |
| ATF5       | -0.071036179 | 0.105658204 | 0.15535161 | 520 | 520 |
| FNBP4      | -0.071044997 | 0.105614813 | 0.15529914 | 520 | 520 |
| TRMT2B     | -0.071058353 | 0.105549125 | 0.15521387 | 520 | 520 |
| SLC25A4    | -0.071088868 | 0.105399171 | 0.15501597 | 520 | 520 |
| THSD1P1    | -0.071118692 | 0.105252769 | 0.15481194 | 520 | 520 |
| NOL4       | -0.07121604  | 0.10477603  | 0.15416695 | 520 | 202 |
| THUMPD3    | -0.071224555 | 0.104734411 | 0.15411696 | 520 | 520 |
| AGL        | -0.071273251 | 0.104496652 | 0.15382322 | 520 | 520 |
| FDX1       | -0.071324137 | 0.104248657 | 0.15350299 | 520 | 520 |
| ELP4       | -0.071365808 | 0.104045919 | 0.15322684 | 520 | 520 |
| LOC148145  | -0.071387634 | 0.103939852 | 0.15308182 | 520 | 43  |
| POTEC      | -0.071432777 | 0.103720755 | 0.15279261 | 520 | 34  |
| WDR5B      | -0.071443716 | 0.103667715 | 0.1527368  | 520 | 520 |
| LENEP      | -0.07144851  | 0.103644478 | 0.15271372 | 520 | 202 |
| TSPAN17    | -0.071475398 | 0.103514229 | 0.1525664  | 520 | 520 |
| CST11      | -0.071506294 | 0.103364724 | 0.15236832 | 520 | 162 |
| C7orf27    | -0.071525475 | 0.103271991 | 0.15224276 | 520 | 520 |
| DLX6AS     | -0.071551292 | 0.103147282 | 0.15207003 | 520 | 501 |
| NSMCE2     | -0.071572324 | 0.103045776 | 0.1519426  | 520 | 520 |
| EPHB3      | -0.071610691 | 0.102860811 | 0.15170314 | 520 | 520 |
| EI24       | -0.071636438 | 0.102736831 | 0.15153319 | 520 | 520 |
| CEP55      | -0.071642698 | 0.102706707 | 0.15150911 | 520 | 520 |
| GAGE10     | -0.071644947 | 0.102695887 | 0.15150423 | 520 | 44  |
| NCRNA00115 | -0.071650271 | 0.102670272 | 0.15148807 | 520 | 520 |
| DGCR14     | -0.071692626 | 0.102466688 | 0.15122142 | 520 | 520 |
| DNAH11     | -0.071751143 | 0.102185941 | 0.15087335 | 520 | 493 |
| LONP1      | -0.071796849 | 0.101967086 | 0.15056124 | 520 | 520 |
| FAM71A     | -0.071802589 | 0.101939627 | 0.15053172 | 520 | 157 |
| ONECUT1    | -0.071821722 | 0.101848138 | 0.15040764 | 520 | 339 |
| SNORA65    | -0.071841323 | 0.101754482 | 0.15029134 | 520 | 77  |
| HPS1       | -0.071848602 | 0.101719724 | 0.15025101 | 520 | 520 |
| EIF3B      | -0.071916973 | 0.101393662 | 0.1498023  | 520 | 520 |
| ARG1       | -0.071917581 | 0.101390764 | 0.1498023  | 520 | 405 |
| MLLT4      | -0.071931308 | 0.101325403 | 0.14972339 | 520 | 520 |
| SOX3       | -0.071953846 | 0.101218155 | 0.14957588 | 520 | 39  |
| PKNOX1     | -0.07201887  | 0.100909252 | 0.14915219 | 520 | 520 |
| BMS1P4     | -0.072045413 | 0.100783373 | 0.1489989  | 520 | 517 |
| DDX46      | -0.072047928 | 0.100771455 | 0.1489922  | 520 | 520 |
| IQCH       | -0.072055106 | 0.100737437 | 0.14895283 | 520 | 520 |
| PCF11      | -0.072104269 | 0.100504693 | 0.14863048 | 520 | 520 |

|           |              |             |            |     |     |
|-----------|--------------|-------------|------------|-----|-----|
| XCL1      | -0.072122739 | 0.100417368 | 0.14851223 | 520 | 515 |
| C17orf104 | -0.072122945 | 0.100416393 | 0.14851223 | 520 | 517 |
| HNF4G     | -0.072225058 | 0.099934687 | 0.14789346 | 520 | 460 |
| HSFY2     | -0.072278303 | 0.099684237 | 0.14755784 | 520 | 77  |
| TMSB10    | -0.072283354 | 0.099660504 | 0.14753354 | 520 | 520 |
| ZNF140    | -0.072291339 | 0.099622998 | 0.14748885 | 520 | 520 |
| WDR47     | -0.072329457 | 0.099444094 | 0.14726724 | 520 | 520 |
| SIGLEC16  | -0.072366399 | 0.09927096  | 0.14702164 | 520 | 496 |
| PIK3R3    | -0.072426571 | 0.09898946  | 0.14663705 | 520 | 520 |
| CYB5A     | -0.072461553 | 0.0988261   | 0.14640581 | 520 | 520 |
| NSF       | -0.072477954 | 0.098749586 | 0.14630321 | 520 | 520 |
| SEPT7P2   | -0.072488811 | 0.098698958 | 0.14623894 | 520 | 519 |
| IFNGR1    | -0.072492231 | 0.098683013 | 0.14622606 | 520 | 520 |
| MTMR14    | -0.072553029 | 0.098399935 | 0.14583876 | 520 | 520 |
| CYP8B1    | -0.072614418 | 0.09811476  | 0.14545886 | 520 | 440 |
| FSCN2     | -0.072614483 | 0.098114457 | 0.14545886 | 520 | 500 |
| KLC3      | -0.072615545 | 0.098109532 | 0.14545886 | 520 | 520 |
| KRT37     | -0.072638572 | 0.098002735 | 0.14533788 | 520 | 415 |
| TMEM82    | -0.072656781 | 0.097918349 | 0.14524243 | 520 | 81  |
| WTAP      | -0.072672058 | 0.0978476   | 0.14514817 | 520 | 520 |
| LRP5L     | -0.072697022 | 0.097732071 | 0.14498745 | 520 | 519 |
| DEDD      | -0.072700437 | 0.097716276 | 0.14498536 | 520 | 520 |
| FOXQ1     | -0.072707175 | 0.097685115 | 0.14494979 | 520 | 519 |
| IL18RAP   | -0.072718148 | 0.097634391 | 0.14488518 | 520 | 517 |
| PLA2G6    | -0.072734815 | 0.097557379 | 0.14480287 | 520 | 520 |
| KRTAP9-8  | -0.072773371 | 0.097379422 | 0.14456001 | 520 | 122 |
| C7orf68   | -0.072887358 | 0.09685481  | 0.14384477 | 520 | 520 |
| CYB5R1    | -0.07289166  | 0.096835053 | 0.14382602 | 520 | 520 |
| OR6C76    | -0.072910478 | 0.09674868  | 0.14370832 | 520 | 20  |
| TMIGD2    | -0.07292401  | 0.096686602 | 0.14362669 | 520 | 511 |
| CRABP2    | -0.072931453 | 0.096652475 | 0.14359715 | 520 | 520 |
| STAP1     | -0.072961225 | 0.096516052 | 0.14340503 | 520 | 505 |
| LRRC37A   | -0.072967425 | 0.096487659 | 0.14337341 | 520 | 520 |
| C17orf28  | -0.072968475 | 0.096482853 | 0.14337341 | 520 | 520 |
| FLJ33360  | -0.07297645  | 0.096446345 | 0.14333314 | 520 | 415 |
| CTXN3     | -0.073026074 | 0.096219428 | 0.14300645 | 520 | 409 |
| RSPH1     | -0.0730521   | 0.096100591 | 0.14284036 | 520 | 503 |
| AMPD3     | -0.073070453 | 0.096016856 | 0.14272642 | 520 | 520 |
| GUCA1B    | -0.073086037 | 0.095945802 | 0.14264183 | 520 | 520 |
| USH2A     | -0.073097111 | 0.095895341 | 0.14257732 | 520 | 417 |
| CLYBL     | -0.073190008 | 0.095472831 | 0.14198054 | 520 | 520 |
| OR1N2     | -0.073213323 | 0.095367028 | 0.14183366 | 520 | 44  |
| C2orf82   | -0.073241023 | 0.095241442 | 0.14165733 | 520 | 404 |
| FIG4      | -0.073271642 | 0.095102777 | 0.14146152 | 520 | 520 |
| FGF21     | -0.073278946 | 0.095069727 | 0.14142279 | 520 | 204 |
| YWHAE     | -0.07333414  | 0.094820245 | 0.14107249 | 520 | 520 |

|            |               |             |            |     |     |
|------------|---------------|-------------|------------|-----|-----|
| NXT2       | -0.073346598  | 0.094764008 | 0.14099922 | 520 | 520 |
| RRN3P3     | -0.073387637  | 0.094578938 | 0.14074463 | 520 | 520 |
| CHRNA4     | -0.073487192  | 0.09413118  | 0.14013002 | 520 | 276 |
| KRT222     | -0.073528814  | 0.093944485 | 0.13986242 | 520 | 520 |
| CSE1L      | -0.073555313  | 0.093825776 | 0.13971664 | 520 | 520 |
| IDO2       | -0.073618607  | 0.093542725 | 0.13931572 | 520 | 453 |
| RAB40B     | -0.073647401  | 0.093414185 | 0.13913456 | 520 | 520 |
| MRAP2      | -0.073682125  | 0.093259359 | 0.13891421 | 520 | 512 |
| OR51V1     | -0.073710201  | 0.093134329 | 0.13874848 | 520 | 22  |
| C1orf174   | -0.073729353  | 0.093049115 | 0.138642   | 520 | 520 |
| KRT36      | -0.07375656   | 0.092928166 | 0.1384925  | 520 | 404 |
| KNDC1      | -0.073805569  | 0.09271062  | 0.13818871 | 520 | 507 |
| TMEM107    | -0.073839613  | 0.092559739 | 0.13799442 | 520 | 520 |
| TAAR8      | -0.073860201  | 0.092468593 | 0.13787695 | 520 | 16  |
| OR10T2     | -0.073898356  | 0.092299857 | 0.13765786 | 520 | 9   |
| OR51D1     | -0.073943512  | 0.092100486 | 0.13737068 | 520 | 11  |
| SCARNA15   | -0.073955556  | 0.092047366 | 0.1373016  | 520 | 15  |
| OR6W1P     | -0.074015345  | 0.091784038 | 0.1369392  | 520 | 61  |
| EPHA6      | -0.074106023  | 0.091385817 | 0.13639553 | 520 | 338 |
| NCRNA00161 | -0.074106868  | 0.091382114 | 0.13639553 | 520 | 176 |
| SAMD7      | -0.074189226  | 0.091021644 | 0.13589223 | 520 | 51  |
| S1PR4      | -0.074196069  | 0.090991743 | 0.13586771 | 520 | 520 |
| SLC22A18AS | -0.074199018  | 0.09097886  | 0.13585853 | 520 | 520 |
| FOXP2      | -0.074220538  | 0.090884894 | 0.13572826 | 520 | 502 |
| AKR1D1     | -0.074340944  | 0.090360576 | 0.13503525 | 520 | 237 |
| C2orf56    | -0.074386322  | 0.090163608 | 0.13475315 | 520 | 520 |
| SLC25A1    | -0.074436493  | 0.089946235 | 0.13445592 | 520 | 520 |
| ATP4A      | -0.0744448131 | 0.089895871 | 0.13440056 | 520 | 237 |
| LOC145845  | -0.074514071  | 0.089610943 | 0.13400438 | 520 | 53  |
| CSN1S2A    | -0.074520094  | 0.08958495  | 0.13397545 | 520 | 3   |
| HIST1H4I   | -0.074525226  | 0.089562812 | 0.13395227 | 520 | 457 |
| RNH1       | -0.074527234  | 0.089554149 | 0.13394925 | 520 | 520 |
| ZNF480     | -0.074562834  | 0.089400702 | 0.13375389 | 520 | 520 |
| LOC153328  | -0.074566976  | 0.089382864 | 0.13374266 | 520 | 469 |
| DRAM2      | -0.074579102  | 0.089330654 | 0.13368712 | 520 | 520 |
| C15orf24   | -0.074604     | 0.089223528 | 0.1335538  | 520 | 520 |
| MST4       | -0.074713617  | 0.088753114 | 0.13289899 | 520 | 520 |
| MOSPD1     | -0.074727196  | 0.088694982 | 0.13282264 | 520 | 520 |
| CSRP2BP    | -0.074728341  | 0.08869008  | 0.13282264 | 520 | 520 |
| ECT2       | -0.074736522  | 0.088655071 | 0.13279162 | 520 | 520 |
| RAB37      | -0.074751154  | 0.088592488 | 0.1327176  | 520 | 520 |
| CIDEA      | -0.074757475  | 0.088565461 | 0.13268697 | 520 | 437 |
| NCRNA00185 | -0.074783973  | 0.088452241 | 0.13254689 | 520 | 350 |
| TEKT4      | -0.074788721  | 0.088431964 | 0.13252636 | 520 | 471 |
| OTUD5      | -0.074789818  | 0.088427282 | 0.13252636 | 520 | 520 |
| GHRH       | -0.074804804  | 0.088363312 | 0.132453   | 520 | 82  |

|              |              |             |            |     |     |
|--------------|--------------|-------------|------------|-----|-----|
| GSTM2P1      | -0.074837334 | 0.088224592 | 0.13226473 | 520 | 460 |
| LIN37        | -0.07484575  | 0.088188727 | 0.1322208  | 520 | 520 |
| IFI44        | -0.074942255 | 0.08777835  | 0.13164467 | 520 | 520 |
| PSMA8        | -0.074950973 | 0.087741352 | 0.13159898 | 520 | 276 |
| CCDC109B     | -0.074974377 | 0.087642094 | 0.13145988 | 520 | 520 |
| TBR1         | -0.074976031 | 0.08763508  | 0.13145914 | 520 | 179 |
| OR2T4        | -0.074982695 | 0.087606836 | 0.13142655 | 520 | 12  |
| ESR2         | -0.075007494 | 0.087501797 | 0.13128851 | 520 | 519 |
| MTRF1        | -0.07501298  | 0.08747857  | 0.13126342 | 520 | 520 |
| RALBP1       | -0.075115013 | 0.087047543 | 0.13064583 | 520 | 520 |
| ZNF705D      | -0.075130432 | 0.086982558 | 0.13055801 | 520 | 77  |
| RPL9         | -0.07513302  | 0.086971653 | 0.13055136 | 520 | 520 |
| KIAA0391     | -0.075166318 | 0.086831459 | 0.13035062 | 520 | 520 |
| RAB18        | -0.075177281 | 0.08678534  | 0.13029109 | 520 | 520 |
| CLEC2A       | -0.075197924 | 0.086698558 | 0.13018988 | 520 | 156 |
| SLC25A16     | -0.075200062 | 0.08668957  | 0.13018608 | 520 | 520 |
| ANKRD39      | -0.075235231 | 0.086541893 | 0.12998367 | 520 | 520 |
| PAQR7        | -0.075282218 | 0.086344902 | 0.12969745 | 520 | 520 |
| LOC100129534 | -0.075306447 | 0.086243466 | 0.12955474 | 520 | 517 |
| P2RY4        | -0.075370705 | 0.085974907 | 0.12918981 | 520 | 353 |
| PDE6A        | -0.075401956 | 0.08584454  | 0.12901314 | 520 | 490 |
| PMS2L1       | -0.075426517 | 0.085742197 | 0.12886894 | 520 | 520 |
| GAS2L2       | -0.075432424 | 0.085717596 | 0.12885117 | 520 | 458 |
| HOXB7        | -0.075439882 | 0.085686545 | 0.12882273 | 520 | 519 |
| LOC728276    | -0.075441658 | 0.085679151 | 0.12882219 | 520 | 14  |
| CDC37L1      | -0.07546416  | 0.085585525 | 0.12871981 | 520 | 520 |
| REXO1L1      | -0.075494577 | 0.085459104 | 0.12853926 | 520 | 170 |
| EDC3         | -0.075529662 | 0.085313464 | 0.12833935 | 520 | 520 |
| RAB12        | -0.075562259 | 0.085178329 | 0.12816475 | 520 | 520 |
| ZBP1         | -0.075562884 | 0.085175741 | 0.12816475 | 520 | 517 |
| OR2Y1        | -0.075575629 | 0.085122953 | 0.12810055 | 520 | 17  |
| F2           | -0.075591686 | 0.085056485 | 0.12801963 | 520 | 264 |
| SH3BGRL2     | -0.075618459 | 0.084945751 | 0.12786251 | 520 | 519 |
| ANKS3        | -0.075626917 | 0.084910794 | 0.12781943 | 520 | 520 |
| OR4D5        | -0.075655386 | 0.084793216 | 0.1276615  | 520 | 30  |
| OSBP2        | -0.075689534 | 0.084652351 | 0.12746845 | 520 | 520 |
| ROPN1B       | -0.075699138 | 0.08461277  | 0.12741836 | 520 | 399 |
| KRTAP12-1    | -0.075716244 | 0.084542304 | 0.12733127 | 520 | 34  |
| SNORA48      | -0.075716912 | 0.084539555 | 0.12733127 | 520 | 107 |
| RFPL3S       | -0.075729606 | 0.084487296 | 0.12728645 | 520 | 457 |
| JOSD2        | -0.075731175 | 0.084480836 | 0.12728623 | 520 | 520 |
| DMRTA1       | -0.075736554 | 0.084458703 | 0.12726239 | 520 | 497 |
| C1orf146     | -0.075740541 | 0.084442297 | 0.12724718 | 520 | 29  |
| EDAR         | -0.075755407 | 0.084381156 | 0.12716455 | 520 | 511 |
| RPAP3        | -0.075790751 | 0.084235936 | 0.12696467 | 520 | 520 |
| CD79A        | -0.07581748  | 0.084126247 | 0.12681831 | 520 | 519 |

|            |              |             |            |     |     |
|------------|--------------|-------------|------------|-----|-----|
| ANP32C     | -0.075823416 | 0.084101905 | 0.12679109 | 520 | 519 |
| WFDC6      | -0.075870691 | 0.083908225 | 0.12651802 | 520 | 56  |
| KRTAP10-10 | -0.075894705 | 0.083809981 | 0.12637933 | 520 | 33  |
| OR1M1      | -0.075908263 | 0.083754558 | 0.12630521 | 520 | 32  |
| OR5M8      | -0.075924307 | 0.083689005 | 0.12622523 | 520 | 16  |
| OR9Q2      | -0.075927349 | 0.083676581 | 0.12621593 | 520 | 13  |
| PROP1      | -0.075936718 | 0.083638326 | 0.12616767 | 520 | 91  |
| FASTKD2    | -0.075939599 | 0.083626566 | 0.12615937 | 520 | 520 |
| UGT1A4     | -0.075946842 | 0.083597007 | 0.12612421 | 520 | 180 |
| C10orf81   | -0.075949591 | 0.08358579  | 0.12611828 | 520 | 492 |
| CNDP2      | -0.075976197 | 0.083477283 | 0.12597947 | 520 | 520 |
| C14orf86   | -0.076007108 | 0.083351368 | 0.12580067 | 520 | 140 |
| ARR3       | -0.076030434 | 0.08325645  | 0.12567623 | 520 | 75  |
| SLC9A8     | -0.076085798 | 0.083031511 | 0.12534606 | 520 | 520 |
| C1GALT1C1  | -0.076110138 | 0.082932778 | 0.12520639 | 520 | 520 |
| MRPL42P5   | -0.076113365 | 0.082919693 | 0.12519601 | 520 | 453 |
| CEBPE      | -0.076139543 | 0.082813622 | 0.12504522 | 520 | 497 |
| CYP4Z2P    | -0.076165038 | 0.082710424 | 0.1249081  | 520 | 252 |
| MTP18      | -0.076173933 | 0.082674442 | 0.12486311 | 520 | 520 |
| B3GNT4     | -0.076194734 | 0.082590351 | 0.1247548  | 520 | 520 |
| ZNF683     | -0.07624944  | 0.082369524 | 0.1244492  | 520 | 514 |
| GLIPR1L1   | -0.076253889 | 0.082351585 | 0.12443142 | 520 | 130 |
| TMEM154    | -0.076267978 | 0.082294799 | 0.12435494 | 520 | 520 |
| 1-Sep      | -0.076270465 | 0.082284779 | 0.12434912 | 520 | 520 |
| FLJ13197   | -0.076288419 | 0.082212472 | 0.12426779 | 520 | 514 |
| FAM86A     | -0.076307714 | 0.082134818 | 0.12415972 | 520 | 520 |
| TMEM95     | -0.076372016 | 0.081876459 | 0.12381558 | 520 | 150 |
| IFNE       | -0.076396682 | 0.081777531 | 0.12367525 | 520 | 479 |
| EMX1       | -0.076406446 | 0.081738397 | 0.12362534 | 520 | 509 |
| RPL39L     | -0.076424919 | 0.081664398 | 0.12353195 | 520 | 520 |
| MTF1       | -0.076487491 | 0.081414147 | 0.12320886 | 520 | 520 |
| DUSP5P     | -0.076514022 | 0.081308231 | 0.12305781 | 520 | 503 |
| HTR1A      | -0.076531561 | 0.08123827  | 0.12297961 | 520 | 13  |
| LOC493754  | -0.076537861 | 0.081213152 | 0.12295082 | 520 | 520 |
| TCEB3C     | -0.076540767 | 0.081201569 | 0.12294252 | 520 | 67  |
| PRRT4      | -0.076574807 | 0.081065976 | 0.12275566 | 520 | 516 |
| RGMA       | -0.076620845 | 0.080882886 | 0.12250601 | 520 | 520 |
| C6orf226   | -0.076629892 | 0.080846949 | 0.12246078 | 520 | 520 |
| CYP2J2     | -0.076634613 | 0.080828198 | 0.12244157 | 520 | 519 |
| LOC150568  | -0.07664565  | 0.080784378 | 0.12239358 | 520 | 64  |
| ARHGEF35   | -0.076647549 | 0.080776841 | 0.12239136 | 520 | 520 |
| JMJD8      | -0.076692547 | 0.080598399 | 0.12213444 | 520 | 520 |
| ENPP7      | -0.076692645 | 0.080598014 | 0.12213444 | 520 | 216 |
| C9orf80    | -0.076715699 | 0.080506714 | 0.12203709 | 520 | 520 |
| MARS2      | -0.076723624 | 0.080475352 | 0.12199872 | 520 | 520 |
| UOX        | -0.076755848 | 0.080347917 | 0.12181469 | 520 | 156 |

|              |              |             |            |     |     |
|--------------|--------------|-------------|------------|-----|-----|
| WNT16        | -0.076759188 | 0.080334722 | 0.12180384 | 520 | 483 |
| PCGF1        | -0.076759434 | 0.080333746 | 0.12180384 | 520 | 520 |
| C6orf146     | -0.076771698 | 0.0802853   | 0.12174722 | 520 | 31  |
| TEX12        | -0.076773598 | 0.080277795 | 0.121745   | 520 | 316 |
| HSD3B7       | -0.076819822 | 0.080095414 | 0.12149582 | 520 | 520 |
| CRYZL1       | -0.076840338 | 0.080014574 | 0.12138233 | 520 | 520 |
| C8orf76      | -0.076893669 | 0.079804742 | 0.12108223 | 520 | 520 |
| OR5D13       | -0.076935619 | 0.079640003 | 0.12084137 | 520 | 6   |
| OR8K5        | -0.076966622 | 0.079518431 | 0.12068415 | 520 | 7   |
| UBAC2        | -0.076968774 | 0.079509998 | 0.12068044 | 520 | 520 |
| MIA2         | -0.077024994 | 0.079289945 | 0.12037362 | 520 | 148 |
| GAL3ST2      | -0.077030668 | 0.079267763 | 0.12035807 | 520 | 394 |
| RPL29P2      | -0.077057436 | 0.079163183 | 0.12021738 | 520 | 255 |
| KCNRG        | -0.077064379 | 0.079136076 | 0.12019432 | 520 | 518 |
| AQP6         | -0.077103332 | 0.078984137 | 0.11998163 | 520 | 481 |
| HKDC1        | -0.077112753 | 0.078947428 | 0.1199349  | 520 | 517 |
| SYCP1        | -0.077120411 | 0.078917594 | 0.11989861 | 520 | 107 |
| OR1L6        | -0.077153776 | 0.078787731 | 0.11971935 | 520 | 11  |
| RNF220       | -0.077154538 | 0.078784767 | 0.11971935 | 520 | 520 |
| ZDHHC14      | -0.077159435 | 0.078765719 | 0.11970524 | 520 | 520 |
| C8orf77      | -0.077169194 | 0.078727776 | 0.11966432 | 520 | 501 |
| KCTD13       | -0.077215981 | 0.078546072 | 0.11941514 | 520 | 520 |
| CTBP2        | -0.077314225 | 0.078165637 | 0.11889951 | 520 | 520 |
| ACTL7A       | -0.077341667 | 0.078059641 | 0.11875619 | 520 | 72  |
| TRIM65       | -0.077342034 | 0.078058222 | 0.11875619 | 520 | 520 |
| SPANXN5      | -0.077372629 | 0.077940183 | 0.1186013  | 520 | 125 |
| ASMT         | -0.077402037 | 0.077826864 | 0.1184378  | 520 | 359 |
| GMPS         | -0.077411942 | 0.077788725 | 0.1183887  | 520 | 520 |
| EIF4E2       | -0.077420551 | 0.077755592 | 0.11835545 | 520 | 520 |
| KIAA1239     | -0.077425909 | 0.077734973 | 0.11833369 | 520 | 462 |
| SLC22A14     | -0.077466239 | 0.077579931 | 0.11810659 | 520 | 404 |
| KCTD19       | -0.077506315 | 0.077426116 | 0.11788132 | 520 | 385 |
| BLM          | -0.077541275 | 0.077292138 | 0.11768622 | 520 | 520 |
| CXorf30      | -0.077552798 | 0.077248018 | 0.11762793 | 520 | 258 |
| RBM15        | -0.077556034 | 0.077235633 | 0.11761795 | 520 | 520 |
| BTG1         | -0.077602611 | 0.077057532 | 0.11738219 | 520 | 520 |
| SLC10A4      | -0.077611219 | 0.077024656 | 0.11734098 | 520 | 477 |
| OR5T1        | -0.0776165   | 0.077004488 | 0.11731912 | 520 | 8   |
| IL29         | -0.077659123 | 0.076841895 | 0.11708025 | 520 | 398 |
| DDX58        | -0.077689849 | 0.076724855 | 0.11691959 | 520 | 520 |
| FAM72A       | -0.077706854 | 0.076660144 | 0.1168298  | 520 | 519 |
| C1orf103     | -0.077779579 | 0.076383891 | 0.1164528  | 520 | 520 |
| MUC6         | -0.077802029 | 0.076298775 | 0.11633183 | 520 | 456 |
| LOC100131551 | -0.077833037 | 0.076181342 | 0.11617035 | 520 | 508 |
| STX17        | -0.077851869 | 0.076110094 | 0.11607926 | 520 | 520 |
| SRCAP        | -0.077855165 | 0.076097629 | 0.11606903 | 520 | 520 |



|            |              |             |            |     |     |
|------------|--------------|-------------|------------|-----|-----|
| OR4C46     | -0.077866321 | 0.076055454 | 0.11601348 | 520 | 11  |
| ANXA10     | -0.077958451 | 0.075707873 | 0.1155095  | 520 | 396 |
| FUT9       | -0.077989448 | 0.07559122  | 0.11534898 | 520 | 234 |
| ODF2L      | -0.078005694 | 0.07553014  | 0.11526449 | 520 | 520 |
| RUNDC3A    | -0.078046872 | 0.075375501 | 0.11503721 | 520 | 520 |
| RAB11FIP4  | -0.078048141 | 0.075370742 | 0.11503721 | 520 | 520 |
| C22orf15   | -0.07804937  | 0.075366131 | 0.11503721 | 520 | 407 |
| PSMD10     | -0.078127915 | 0.07507191  | 0.11463461 | 520 | 520 |
| COX6B2     | -0.078156083 | 0.074966623 | 0.1144825  | 520 | 520 |
| MFSD8      | -0.078172358 | 0.074905847 | 0.11439836 | 520 | 520 |
| ACSM1      | -0.078183638 | 0.074863745 | 0.11434272 | 520 | 485 |
| S100G      | -0.078199374 | 0.074805047 | 0.11426172 | 520 | 4   |
| LOC399744  | -0.078227615 | 0.074699795 | 0.11411824 | 520 | 520 |
| SYBU       | -0.078268398 | 0.074548011 | 0.11390362 | 520 | 520 |
| LOC348840  | -0.078306978 | 0.074404659 | 0.11371906 | 520 | 276 |
| CDC42      | -0.078311867 | 0.074386505 | 0.11369993 | 520 | 520 |
| ISG15      | -0.078323313 | 0.074344028 | 0.11364362 | 520 | 520 |
| SLC10A2    | -0.078344052 | 0.074267111 | 0.11355187 | 520 | 95  |
| ZNF440     | -0.078366075 | 0.074185503 | 0.11343569 | 520 | 520 |
| RFT1       | -0.0783943   | 0.074081022 | 0.11330171 | 520 | 520 |
| TOPBP1     | -0.07840788  | 0.074030793 | 0.11324207 | 520 | 520 |
| ADARB2     | -0.078414834 | 0.074005086 | 0.11321133 | 520 | 459 |
| C1orf64    | -0.078441708 | 0.073905796 | 0.11308518 | 520 | 247 |
| IHH        | -0.078441749 | 0.073905647 | 0.11308518 | 520 | 358 |
| NCRNA00157 | -0.078457169 | 0.073848727 | 0.11301501 | 520 | 59  |
| BPHL       | -0.07848923  | 0.073730492 | 0.11284263 | 520 | 520 |
| MGC16025   | -0.0785003   | 0.073689703 | 0.11280009 | 520 | 408 |
| HOXD9      | -0.078509257 | 0.073656713 | 0.11276395 | 520 | 520 |
| NCOA5      | -0.078519264 | 0.073619873 | 0.11271611 | 520 | 520 |
| KEL        | -0.078528723 | 0.07358506  | 0.11269546 | 520 | 462 |
| STOM       | -0.07857369  | 0.07341976  | 0.11246096 | 520 | 520 |
| RABGEF1    | -0.078577298 | 0.073406508 | 0.1124492  | 520 | 520 |
| RMRP       | -0.078581643 | 0.073390554 | 0.1124333  | 520 | 519 |
| C3orf71    | -0.078583031 | 0.07338546  | 0.1124333  | 520 | 520 |
| PYY2       | -0.078587865 | 0.073367714 | 0.11241539 | 520 | 509 |
| C2orf57    | -0.078593576 | 0.073346754 | 0.11239182 | 520 | 58  |
| RNU11      | -0.078609427 | 0.073288605 | 0.11233686 | 520 | 73  |
| SNORA20    | -0.078625275 | 0.073230501 | 0.11225754 | 520 | 37  |
| GPRC5A     | -0.078635799 | 0.073191941 | 0.11223525 | 520 | 520 |
| SNORA5A    | -0.078662079 | 0.073095717 | 0.11210085 | 520 | 52  |
| LOC644165  | -0.078676743 | 0.073042069 | 0.1120271  | 520 | 494 |
| LOC285740  | -0.078685795 | 0.07300897  | 0.11198485 | 520 | 142 |
| ASTL       | -0.078702034 | 0.072949621 | 0.11190233 | 520 | 452 |
| UNC50      | -0.078714181 | 0.072905252 | 0.11184278 | 520 | 520 |
| LOC152024  | -0.078724745 | 0.072866684 | 0.11179591 | 520 | 347 |
| CFLAR      | -0.078728144 | 0.072854277 | 0.1117901  | 520 | 520 |

|              |              |             |            |     |     |
|--------------|--------------|-------------|------------|-----|-----|
| SLC44A3      | -0.078735721 | 0.072826629 | 0.11176468 | 520 | 520 |
| HIST1H2BC    | -0.078751845 | 0.07276782  | 0.11169993 | 520 | 520 |
| FOXN4        | -0.078755182 | 0.072755657 | 0.11168977 | 520 | 138 |
| RPL21P44     | -0.078792299 | 0.072620444 | 0.11149068 | 520 | 460 |
| SLC22A8      | -0.078812274 | 0.072547764 | 0.11138758 | 520 | 93  |
| EIF3G        | -0.078812297 | 0.072547682 | 0.11138758 | 520 | 520 |
| C17orf81     | -0.078851003 | 0.072407016 | 0.11120535 | 520 | 520 |
| HSD11B1L     | -0.078943151 | 0.072073027 | 0.1107177  | 520 | 520 |
| FAM92A3      | -0.078951902 | 0.072041376 | 0.11068594 | 520 | 69  |
| BCL11B       | -0.078975023 | 0.071957803 | 0.11056596 | 520 | 520 |
| RAD54B       | -0.078999687 | 0.071868738 | 0.11044594 | 520 | 520 |
| G6PD         | -0.079018054 | 0.071802471 | 0.11035252 | 520 | 520 |
| PARP6        | -0.079036783 | 0.071734948 | 0.11025715 | 520 | 520 |
| OR52N4       | -0.079043733 | 0.071709909 | 0.11022706 | 520 | 271 |
| NKIRAS2      | -0.07905854  | 0.071656577 | 0.11016188 | 520 | 520 |
| RPS28        | -0.079060104 | 0.071650947 | 0.11016162 | 520 | 519 |
| PTPRCAP      | -0.079063992 | 0.071636949 | 0.11014926 | 520 | 520 |
| PRPF6        | -0.079079429 | 0.071581397 | 0.11007987 | 520 | 520 |
| ACTR3C       | -0.079088432 | 0.071549018 | 0.11004686 | 520 | 520 |
| KLRC3        | -0.079097551 | 0.071516229 | 0.11001322 | 520 | 447 |
| GFM1         | -0.079158888 | 0.071296013 | 0.10969957 | 520 | 520 |
| LOC392196    | -0.079185683 | 0.071199985 | 0.10956853 | 520 | 86  |
| TOR3A        | -0.079192786 | 0.071174547 | 0.10954611 | 520 | 520 |
| LOC595101    | -0.07919695  | 0.071159639 | 0.10953989 | 520 | 519 |
| OR2T11       | -0.079201853 | 0.071142088 | 0.10952123 | 520 | 16  |
| NOP14        | -0.079259067 | 0.070937536 | 0.10921467 | 520 | 520 |
| MSH2         | -0.079264618 | 0.070917715 | 0.10919433 | 520 | 520 |
| SH3BGRL3     | -0.07926629  | 0.070911747 | 0.10919433 | 520 | 520 |
| C16orf3      | -0.079277925 | 0.070870219 | 0.1091562  | 520 | 379 |
| C17orf93     | -0.079308874 | 0.070759858 | 0.1090077  | 520 | 227 |
| COMMD8       | -0.079317738 | 0.070728274 | 0.10897569 | 520 | 520 |
| FAR1         | -0.079323809 | 0.070706651 | 0.1089507  | 520 | 520 |
| UNC13D       | -0.079326158 | 0.070698283 | 0.10894614 | 520 | 520 |
| PSMD7        | -0.079328906 | 0.070688498 | 0.10893938 | 520 | 520 |
| ADAMTSL5     | -0.079330112 | 0.070684206 | 0.10893938 | 520 | 520 |
| XKR9         | -0.079340035 | 0.07064888  | 0.10889497 | 520 | 517 |
| MAP2K5       | -0.079352596 | 0.070604187 | 0.1088344  | 520 | 520 |
| GPR108       | -0.07936739  | 0.070551576 | 0.10876162 | 520 | 520 |
| SNORA21      | -0.079367465 | 0.07055131  | 0.10876162 | 520 | 67  |
| SNORD1C      | -0.079438044 | 0.070300759 | 0.10840812 | 520 | 519 |
| ZNF79        | -0.079440051 | 0.070293645 | 0.10840543 | 520 | 520 |
| NADK         | -0.079441054 | 0.07029009  | 0.10840543 | 520 | 520 |
| TSGA13       | -0.079444234 | 0.070278821 | 0.10840543 | 520 | 58  |
| DEPDC1       | -0.07946455  | 0.070206851 | 0.10830472 | 520 | 520 |
| TMEM102      | -0.07947002  | 0.070187487 | 0.10828313 | 520 | 520 |
| LOC100133612 | -0.079476785 | 0.070163542 | 0.10825447 | 520 | 504 |

|           |              |             |            |     |     |
|-----------|--------------|-------------|------------|-----|-----|
| ZMIZ2     | -0.079570575 | 0.06983225  | 0.10776806 | 520 | 520 |
| OR10G8    | -0.079586263 | 0.069776962 | 0.10769922 | 520 | 4   |
| LRGUK     | -0.079596622 | 0.069740474 | 0.10765115 | 520 | 480 |
| CATSPER4  | -0.079645339 | 0.069569083 | 0.10740303 | 520 | 82  |
| TAS2R7    | -0.079683899 | 0.06943367  | 0.10720218 | 520 | 10  |
| C11orf86  | -0.079754352 | 0.069186816 | 0.10687015 | 520 | 284 |
| TLE3      | -0.079754515 | 0.069186246 | 0.10687015 | 520 | 520 |
| POM121L2  | -0.079791483 | 0.069057005 | 0.10668598 | 520 | 181 |
| VPS16     | -0.07979681  | 0.069038396 | 0.10666541 | 520 | 520 |
| SPZ1      | -0.079798177 | 0.069033623 | 0.10666541 | 520 | 102 |
| GPRC5D    | -0.079817533 | 0.06896605  | 0.10656996 | 520 | 515 |
| MAGI3     | -0.079820963 | 0.068954084 | 0.10655964 | 520 | 520 |
| SMAD3     | -0.079848149 | 0.068859282 | 0.10642945 | 520 | 520 |
| TDP1      | -0.079884137 | 0.068733954 | 0.10626832 | 520 | 520 |
| OR2G2     | -0.079894718 | 0.068697139 | 0.10621955 | 520 | 22  |
| SCARNA7   | -0.079894842 | 0.068696709 | 0.10621955 | 520 | 330 |
| DUSP5     | -0.07989565  | 0.068693897 | 0.10621955 | 520 | 520 |
| ITGB7     | -0.079910073 | 0.068643745 | 0.10616141 | 520 | 520 |
| C2orf53   | -0.079930478 | 0.068572842 | 0.10605989 | 520 | 84  |
| ARHGAP33  | -0.079972033 | 0.068428636 | 0.10586933 | 520 | 520 |
| LOC340357 | -0.08000733  | 0.06830634  | 0.10571257 | 520 | 34  |
| UFSP1     | -0.080132447 | 0.067874289 | 0.10507617 | 520 | 520 |
| FAM123C   | -0.080141427 | 0.067843365 | 0.10504337 | 520 | 178 |
| FASTKD3   | -0.080177047 | 0.067720817 | 0.10487079 | 520 | 520 |
| AHDC1     | -0.080231827 | 0.067532708 | 0.10458752 | 520 | 520 |
| MYNN      | -0.080240368 | 0.067503414 | 0.10455018 | 520 | 520 |
| KRTAP5-4  | -0.080243334 | 0.067493248 | 0.10454247 | 520 | 135 |
| RPS6KB1   | -0.080293587 | 0.067321142 | 0.10430794 | 520 | 520 |
| PNPLA1    | -0.080300799 | 0.067296471 | 0.10427773 | 520 | 508 |
| COG7      | -0.080363292 | 0.067083016 | 0.10397893 | 520 | 520 |
| SUCLA2    | -0.080379129 | 0.067029008 | 0.10390321 | 520 | 520 |
| CDY2B     | -0.080401247 | 0.066953641 | 0.10379436 | 520 | 32  |
| DDX5      | -0.080420821 | 0.066887004 | 0.10369903 | 520 | 520 |
| HTATIP2   | -0.080439329 | 0.066824044 | 0.10361735 | 520 | 520 |
| C1orf194  | -0.08046012  | 0.066753378 | 0.10353962 | 520 | 168 |
| RIPK1     | -0.080529632 | 0.066517552 | 0.10319142 | 520 | 520 |
| DNAJC2    | -0.080535637 | 0.066497214 | 0.10317404 | 520 | 520 |
| HMGB3L1   | -0.080591881 | 0.066306953 | 0.10290259 | 520 | 283 |
| LOC338651 | -0.080607032 | 0.066255774 | 0.10283108 | 520 | 425 |
| ENO1      | -0.080610851 | 0.06624288  | 0.1028269  | 520 | 520 |
| C15orf2   | -0.08062558  | 0.066193171 | 0.10275765 | 520 | 97  |
| FOXD4L3   | -0.080666095 | 0.066056586 | 0.10255351 | 520 | 196 |
| LSG1      | -0.080682146 | 0.066002538 | 0.10248538 | 520 | 520 |
| GLUL      | -0.080778187 | 0.065679909 | 0.1020237  | 520 | 520 |
| OR12D3    | -0.080820834 | 0.06553706  | 0.1018175  | 520 | 28  |
| OR56B1    | -0.080827688 | 0.065514127 | 0.10178971 | 520 | 95  |

|              |              |             |            |     |     |
|--------------|--------------|-------------|------------|-----|-----|
| WDR37        | -0.080861007 | 0.065402732 | 0.10162447 | 520 | 520 |
| OR10C1       | -0.080874897 | 0.065356341 | 0.10156021 | 520 | 14  |
| ATP6V0D1     | -0.080903258 | 0.065261701 | 0.10142096 | 520 | 520 |
| NR0B2        | -0.080910528 | 0.065237461 | 0.1013911  | 520 | 215 |
| PAICS        | -0.080919944 | 0.065206073 | 0.10135013 | 520 | 520 |
| PANK1        | -0.080930914 | 0.065169522 | 0.10130113 | 520 | 520 |
| CYP51A1      | -0.08093523  | 0.065155147 | 0.10128659 | 520 | 520 |
| CRX          | -0.080937978 | 0.065145994 | 0.10128017 | 520 | 175 |
| OR5D16       | -0.080967327 | 0.065048321 | 0.10114392 | 520 | 5   |
| OR51S1       | -0.080975223 | 0.065022063 | 0.10111089 | 520 | 5   |
| TRIM42       | -0.081037648 | 0.064814777 | 0.10081188 | 520 | 46  |
| LOC100287227 | -0.081063557 | 0.064728905 | 0.10068608 | 520 | 515 |
| NEUROD2      | -0.081107172 | 0.064584561 | 0.10048481 | 520 | 256 |
| UGT1A3       | -0.081113644 | 0.064563163 | 0.10045927 | 520 | 216 |
| FUT5         | -0.081233055 | 0.064169431 | 0.09989288 | 520 | 331 |
| SLC25A18     | -0.081233573 | 0.06416773  | 0.09989288 | 520 | 520 |
| LOC100128573 | -0.081259333 | 0.064083052 | 0.09977381 | 520 | 337 |
| FBXO44       | -0.0812705   | 0.064046375 | 0.09972441 | 520 | 520 |
| BZRAP1       | -0.081300487 | 0.063947966 | 0.09957887 | 520 | 519 |
| PLSCR1       | -0.081383536 | 0.063676072 | 0.09919378 | 520 | 520 |
| KIR2DS4      | -0.081402537 | 0.063613997 | 0.0991124  | 520 | 364 |
| UNC13C       | -0.081416368 | 0.063568846 | 0.0990497  | 520 | 262 |
| TAS2R4       | -0.081525532 | 0.063213399 | 0.09852632 | 520 | 376 |
| NCF1B        | -0.081528457 | 0.063203898 | 0.09851913 | 520 | 520 |
| KLRC2        | -0.081556558 | 0.063112675 | 0.09839975 | 520 | 495 |
| DNA2         | -0.081602818 | 0.062962739 | 0.09817759 | 520 | 520 |
| VGFB         | -0.081624251 | 0.062893373 | 0.09808817 | 520 | 511 |
| PRR23C       | -0.081652996 | 0.062800438 | 0.09795838 | 520 | 60  |
| FAM92B       | -0.081669585 | 0.062746858 | 0.09788238 | 520 | 402 |
| C12orf41     | -0.081679858 | 0.062713695 | 0.09784579 | 520 | 520 |
| AIMP2        | -0.081691748 | 0.062675333 | 0.0977935  | 520 | 520 |
| KPRP         | -0.081725993 | 0.062564947 | 0.09763637 | 520 | 507 |
| C10orf75     | -0.081746553 | 0.062498749 | 0.09754817 | 520 | 520 |
| AXIN1        | -0.081764012 | 0.062442581 | 0.09747559 | 520 | 520 |
| ALPL2        | -0.081788897 | 0.062362598 | 0.09735827 | 520 | 307 |
| OR5AC2       | -0.081795007 | 0.062342973 | 0.09733517 | 520 | 10  |
| PRO0628      | -0.081796093 | 0.062339484 | 0.09733517 | 520 | 295 |
| CLDN25       | -0.081898378 | 0.062011708 | 0.09684796 | 520 | 35  |
| TMEM168      | -0.08194127  | 0.061874684 | 0.09664894 | 520 | 520 |
| EIF3F        | -0.081956796 | 0.061825146 | 0.09657904 | 520 | 520 |
| FASLG        | -0.081992231 | 0.061712207 | 0.09641755 | 520 | 510 |
| DEFB126      | -0.08200666  | 0.061666268 | 0.09635325 | 520 | 246 |
| SULT1E1      | -0.082032535 | 0.061583955 | 0.09623955 | 520 | 483 |
| FAM194B      | -0.082074833 | 0.061449599 | 0.09605936 | 520 | 11  |
| FAM150B      | -0.082089661 | 0.061402553 | 0.09599326 | 520 | 456 |
| BCAN         | -0.082095543 | 0.0613839   | 0.09597898 | 520 | 507 |

|              |              |             |            |     |     |
|--------------|--------------|-------------|------------|-----|-----|
| GPR128       | -0.082184682 | 0.061101792 | 0.09556011 | 520 | 282 |
| CARKD        | -0.082233015 | 0.060949276 | 0.09533637 | 520 | 520 |
| C14orf104    | -0.082257706 | 0.060871486 | 0.09522208 | 520 | 520 |
| CHCHD2       | -0.082265079 | 0.060848273 | 0.09519315 | 520 | 520 |
| ACOT4        | -0.082271859 | 0.060826932 | 0.09516715 | 520 | 520 |
| EXOSC6       | -0.08229816  | 0.060744208 | 0.09505248 | 520 | 520 |
| KRT25        | -0.082302729 | 0.060729848 | 0.09504476 | 520 | 97  |
| FCRL4        | -0.082341054 | 0.060609496 | 0.09487113 | 520 | 381 |
| NANOG        | -0.082345236 | 0.060596372 | 0.09485795 | 520 | 324 |
| MT1H         | -0.082355753 | 0.060563388 | 0.09481368 | 520 | 513 |
| DLGAP1       | -0.082394635 | 0.060441562 | 0.09463765 | 520 | 479 |
| CDKL4        | -0.082404428 | 0.060410914 | 0.09459701 | 520 | 212 |
| GLA          | -0.082409287 | 0.060395709 | 0.09458054 | 520 | 520 |
| LOC100270804 | -0.082413834 | 0.060381485 | 0.09456561 | 520 | 518 |
| JMJD4        | -0.082417878 | 0.060368835 | 0.09455315 | 520 | 520 |
| DDC          | -0.082484827 | 0.060159755 | 0.09423299 | 520 | 336 |
| TCTE1        | -0.082550612 | 0.059954897 | 0.0939194  | 520 | 286 |
| HNRNPK       | -0.08256156  | 0.059920859 | 0.09387337 | 520 | 520 |
| DRG1         | -0.08257065  | 0.05989261  | 0.09383641 | 520 | 520 |
| WSB1         | -0.082683591 | 0.059542548 | 0.0933097  | 520 | 520 |
| SNHG5        | -0.0826941   | 0.059510063 | 0.09326604 | 520 | 520 |
| MAEA         | -0.082716296 | 0.059441496 | 0.09316582 | 520 | 520 |
| C21orf131    | -0.082716491 | 0.059440893 | 0.09316582 | 520 | 34  |
| C1orf43      | -0.082783193 | 0.059235235 | 0.09287142 | 520 | 520 |
| LARP1B       | -0.082792772 | 0.05920575  | 0.09283241 | 520 | 520 |
| IDH3G        | -0.082797636 | 0.059190782 | 0.09281615 | 520 | 520 |
| GABPB2       | -0.082799601 | 0.059184738 | 0.09281389 | 520 | 520 |
| POTEB        | -0.082810347 | 0.059151684 | 0.09276927 | 520 | 30  |
| ATF3         | -0.082825757 | 0.059104311 | 0.09270219 | 520 | 520 |
| AKR1C3       | -0.082869931 | 0.058968684 | 0.09250386 | 520 | 520 |
| LOC100129387 | -0.082886823 | 0.05891689  | 0.0924298  | 520 | 520 |
| SPPL2B       | -0.082893114 | 0.058897612 | 0.09241393 | 520 | 520 |
| HELQ         | -0.082902531 | 0.058868762 | 0.09238304 | 520 | 520 |
| ZNF10        | -0.082912143 | 0.058839324 | 0.09234613 | 520 | 520 |
| PFKL         | -0.082978232 | 0.058637266 | 0.09204841 | 520 | 520 |
| CCL20        | -0.083030917 | 0.058476598 | 0.09181764 | 520 | 520 |
| ZNF814       | -0.08306678  | 0.058367439 | 0.09166766 | 520 | 520 |
| FPGS         | -0.083072642 | 0.058349613 | 0.0916468  | 520 | 520 |
| UFSP2        | -0.083174915 | 0.058039322 | 0.09119496 | 520 | 520 |
| RIN1         | -0.083179943 | 0.058024103 | 0.09117815 | 520 | 520 |
| MARK2        | -0.083181929 | 0.058018092 | 0.09117581 | 520 | 520 |
| BPIL1        | -0.083183167 | 0.058014347 | 0.09117581 | 520 | 245 |
| UTP6         | -0.083210508 | 0.057931659 | 0.09106127 | 520 | 520 |
| HOXA9        | -0.083228525 | 0.05787722  | 0.09098279 | 520 | 513 |
| KIAA0125     | -0.083255776 | 0.057794965 | 0.09086765 | 520 | 501 |
| IRF7         | -0.083346849 | 0.057520768 | 0.09047182 | 520 | 520 |

|            |              |             |            |     |     |
|------------|--------------|-------------|------------|-----|-----|
| PSMD8      | -0.083394821 | 0.057376772 | 0.09026646 | 520 | 520 |
| IGBP1      | -0.083415825 | 0.05731382  | 0.09017446 | 520 | 520 |
| POLG2      | -0.083475374 | 0.05713565  | 0.08991518 | 520 | 520 |
| ZWILCH     | -0.083782013 | 0.056225453 | 0.08854499 | 520 | 520 |
| CRYGA      | -0.083800572 | 0.056170754 | 0.08847267 | 520 | 7   |
| VENTXP7    | -0.083819175 | 0.056115967 | 0.08839544 | 520 | 98  |
| RAF1       | -0.083820137 | 0.056113135 | 0.08839544 | 520 | 520 |
| SKIV2L2    | -0.083833965 | 0.056072442 | 0.08834542 | 520 | 520 |
| PTPRZ1     | -0.083874296 | 0.055953896 | 0.0881931  | 520 | 520 |
| NAE1       | -0.083875677 | 0.055949841 | 0.0881931  | 520 | 520 |
| SCML2      | -0.083892328 | 0.055900964 | 0.08813034 | 520 | 518 |
| C12orf40   | -0.083894407 | 0.055894861 | 0.08812761 | 520 | 113 |
| MLF1       | -0.083946208 | 0.055743042 | 0.08790886 | 520 | 520 |
| LCE3E      | -0.083991369 | 0.05561096  | 0.08772801 | 520 | 504 |
| CXorf66    | -0.084001907 | 0.055580178 | 0.08768631 | 520 | 10  |
| SNAR-G1    | -0.08402712  | 0.055506588 | 0.08759762 | 520 | 20  |
| EFHD2      | -0.084057492 | 0.055418044 | 0.08747843 | 520 | 520 |
| ARHGEF33   | -0.084158007 | 0.05512585  | 0.08705127 | 520 | 499 |
| H2AFV      | -0.084181847 | 0.055056739 | 0.08694894 | 520 | 520 |
| GFM2       | -0.084188347 | 0.055037906 | 0.08692601 | 520 | 520 |
| STK40      | -0.084211253 | 0.054971586 | 0.08684847 | 520 | 520 |
| CNDP1      | -0.084224173 | 0.05493421  | 0.08679622 | 520 | 285 |
| OR4D9      | -0.084237795 | 0.054894824 | 0.08674759 | 520 | 56  |
| SENP5      | -0.084243557 | 0.054878172 | 0.08672807 | 520 | 520 |
| KRTAP5-3   | -0.084262125 | 0.054824536 | 0.08665689 | 520 | 86  |
| KCTD15     | -0.084291594 | 0.054739503 | 0.08652927 | 520 | 520 |
| PLK4       | -0.084312634 | 0.054678859 | 0.08644696 | 520 | 520 |
| ASRGL1     | -0.084362444 | 0.054535511 | 0.08623385 | 520 | 520 |
| PRR15      | -0.084390269 | 0.054455573 | 0.08612095 | 520 | 517 |
| AGXT       | -0.084413567 | 0.054388711 | 0.08602196 | 520 | 182 |
| AATF       | -0.084416672 | 0.054379807 | 0.08601462 | 520 | 520 |
| NCRNA00086 | -0.084464142 | 0.054243809 | 0.08582971 | 520 | 518 |
| VRK2       | -0.084465571 | 0.05423972  | 0.08582971 | 520 | 520 |
| LOC284009  | -0.084467726 | 0.054233552 | 0.08582971 | 520 | 305 |
| SCML1      | -0.084475655 | 0.054210868 | 0.08580125 | 520 | 520 |
| SUMO1P3    | -0.084485465 | 0.054182813 | 0.08576358 | 520 | 520 |
| TMEM165    | -0.084498548 | 0.054145416 | 0.08571111 | 520 | 520 |
| NHLRC1     | -0.084535302 | 0.054040472 | 0.08555171 | 520 | 520 |
| LRRC31     | -0.084539464 | 0.0540286   | 0.08553963 | 520 | 148 |
| SPSB2      | -0.084565567 | 0.053954185 | 0.08542852 | 520 | 520 |
| PRM2       | -0.08460289  | 0.05384793  | 0.08527367 | 520 | 28  |
| ARMC10     | -0.084607832 | 0.053833875 | 0.08525811 | 520 | 520 |
| PARK7      | -0.084619589 | 0.053800448 | 0.08521186 | 520 | 520 |
| STIL       | -0.084643215 | 0.053733325 | 0.08512561 | 520 | 520 |
| TUBGCP2    | -0.084662395 | 0.053678886 | 0.08504605 | 520 | 520 |
| OR5M9      | -0.084667404 | 0.053664677 | 0.08503022 | 520 | 7   |

|           |              |             |            |     |     |
|-----------|--------------|-------------|------------|-----|-----|
| HIST2H4A  | -0.084669779 | 0.053657942 | 0.08502813 | 520 | 520 |
| ELAVL1    | -0.084677134 | 0.053637084 | 0.0850199  | 520 | 520 |
| TMC4      | -0.084678079 | 0.053634406 | 0.0850199  | 520 | 520 |
| ZP3       | -0.084689784 | 0.053601228 | 0.08498311 | 520 | 520 |
| C17orf99  | -0.084703701 | 0.053561804 | 0.08495282 | 520 | 512 |
| SNORA38B  | -0.084707242 | 0.053551778 | 0.08494478 | 520 | 10  |
| TRMT61A   | -0.08474582  | 0.053442637 | 0.08479834 | 520 | 520 |
| KIAA1683  | -0.084793757 | 0.053307275 | 0.08459022 | 520 | 518 |
| CLRN2     | -0.084798397 | 0.05329419  | 0.08457611 | 520 | 10  |
| LOC619207 | -0.084809892 | 0.05326178  | 0.08453133 | 520 | 516 |
| TFDP1     | -0.084829495 | 0.053206549 | 0.08445032 | 520 | 520 |
| FSCB      | -0.084854433 | 0.053136353 | 0.08435882 | 520 | 54  |
| MGC26647  | -0.084879834 | 0.053064936 | 0.08425871 | 520 | 13  |
| C10orf47  | -0.084888477 | 0.053040653 | 0.08423342 | 520 | 520 |
| AARS2     | -0.084889847 | 0.053036806 | 0.08423342 | 520 | 520 |
| FCRL1     | -0.084895471 | 0.053021011 | 0.08421549 | 520 | 392 |
| SDHAP3    | -0.084895709 | 0.053020342 | 0.08421549 | 520 | 520 |
| SLC9A3    | -0.084938337 | 0.052900751 | 0.08403772 | 520 | 516 |
| APOBEC3B  | -0.084986382 | 0.052766234 | 0.08384384 | 520 | 520 |
| KRT82     | -0.085002588 | 0.052720923 | 0.08377844 | 520 | 429 |
| TSPAN19   | -0.085002773 | 0.052720405 | 0.08377844 | 520 | 185 |
| CHMP1A    | -0.08500808  | 0.052705575 | 0.08376726 | 520 | 520 |
| TMEM50B   | -0.085009338 | 0.05270206  | 0.08376726 | 520 | 520 |
| C1orf115  | -0.08506755  | 0.052539623 | 0.08352448 | 520 | 520 |
| OR8D2     | -0.085083509 | 0.052495165 | 0.08346574 | 520 | 12  |
| CSTL1     | -0.085134924 | 0.052352143 | 0.08325803 | 520 | 318 |
| TUT1      | -0.085142635 | 0.052330721 | 0.08323053 | 520 | 520 |
| SCGB1C1   | -0.085165322 | 0.052267735 | 0.08314347 | 520 | 51  |
| POLD4     | -0.085176417 | 0.052236957 | 0.08310107 | 520 | 520 |
| SFT2D1    | -0.085188798 | 0.052202629 | 0.08305301 | 520 | 520 |
| MOV10     | -0.085193277 | 0.052190213 | 0.08303981 | 520 | 520 |
| MAP7D2    | -0.085210795 | 0.052141683 | 0.08297568 | 520 | 505 |
| CCDC14    | -0.085265493 | 0.051990394 | 0.08275452 | 520 | 520 |
| IRF1      | -0.085266187 | 0.051988479 | 0.08275452 | 520 | 520 |
| SEPT7L    | -0.085332009 | 0.051806915 | 0.08248852 | 520 | 220 |
| APOL2     | -0.085361724 | 0.051725121 | 0.08236479 | 520 | 520 |
| WDR45     | -0.085411463 | 0.051588451 | 0.08216663 | 520 | 520 |
| ELOVL1    | -0.085450502 | 0.051481394 | 0.08200907 | 520 | 520 |
| LOC201651 | -0.085497368 | 0.051353116 | 0.08182412 | 520 | 489 |
| CNGB3     | -0.085514438 | 0.05130646  | 0.0817627  | 520 | 452 |
| LOC389458 | -0.08554146  | 0.051232674 | 0.08166448 | 520 | 506 |
| C14orf153 | -0.085580103 | 0.051127311 | 0.08152231 | 520 | 520 |
| CYTH1     | -0.085582984 | 0.051119465 | 0.08151624 | 520 | 520 |
| PGLYRP2   | -0.085584975 | 0.051114042 | 0.08151404 | 520 | 425 |
| SCRN3     | -0.085591419 | 0.051096492 | 0.0814925  | 520 | 520 |
| EP400NL   | -0.085601833 | 0.051068143 | 0.0814556  | 520 | 520 |

|           |              |             |            |     |     |
|-----------|--------------|-------------|------------|-----|-----|
| C16orf48  | -0.085621405 | 0.051014902 | 0.081401   | 520 | 520 |
| MRGPRX2   | -0.085654214 | 0.05092575  | 0.08127633 | 520 | 288 |
| CHODL     | -0.085706286 | 0.050784526 | 0.08107832 | 520 | 515 |
| CAPN9     | -0.085745272 | 0.050679007 | 0.08091626 | 520 | 361 |
| PNKP      | -0.085764691 | 0.050626515 | 0.08083885 | 520 | 520 |
| SNHG4     | -0.085816791 | 0.05048591  | 0.08062711 | 520 | 508 |
| KIF24     | -0.085828122 | 0.050455372 | 0.08058472 | 520 | 520 |
| RANBP9    | -0.085893071 | 0.050280636 | 0.08032473 | 520 | 520 |
| OR5K4     | -0.085915095 | 0.050221497 | 0.08023661 | 520 | 10  |
| KLK14     | -0.085930157 | 0.050181088 | 0.08019111 | 520 | 514 |
| C10orf40  | -0.085976081 | 0.050058043 | 0.08001351 | 520 | 32  |
| SULT1C3   | -0.086007838 | 0.049973106 | 0.07988407 | 520 | 54  |
| FEZF1     | -0.086092409 | 0.049747495 | 0.07953604 | 520 | 316 |
| 12-Sep    | -0.086115333 | 0.049686489 | 0.0794511  | 520 | 153 |
| C3orf75   | -0.086135371 | 0.049633212 | 0.0793785  | 520 | 520 |
| PWRN1     | -0.086152365 | 0.049588068 | 0.07931259 | 520 | 54  |
| SLC7A14   | -0.086184984 | 0.049501511 | 0.07919299 | 520 | 193 |
| PARP16    | -0.08618836  | 0.049492559 | 0.07918495 | 520 | 520 |
| MORN5     | -0.086202088 | 0.049456175 | 0.07913302 | 520 | 162 |
| ENGASE    | -0.086280388 | 0.049249076 | 0.07881416 | 520 | 520 |
| C9orf131  | -0.086305521 | 0.049182755 | 0.07872052 | 520 | 449 |
| HNRNPU    | -0.086323694 | 0.049134844 | 0.07865008 | 520 | 520 |
| CA11      | -0.086454225 | 0.048791878 | 0.07813831 | 520 | 520 |
| KLF1      | -0.086458617 | 0.048780371 | 0.07812608 | 520 | 460 |
| PPP1CB    | -0.086484466 | 0.048712707 | 0.07802391 | 520 | 520 |
| KRT6B     | -0.086505271 | 0.0486583   | 0.07794915 | 520 | 520 |
| PNMA3     | -0.086515688 | 0.04863108  | 0.07791793 | 520 | 502 |
| FCGBP     | -0.086526101 | 0.048603881 | 0.07788054 | 520 | 520 |
| FOXD4L5   | -0.08665385  | 0.048271243 | 0.07736598 | 520 | 111 |
| SAE1      | -0.086697833 | 0.04815716  | 0.07718927 | 520 | 520 |
| TMC6      | -0.086708202 | 0.048130297 | 0.07715234 | 520 | 520 |
| C14orf128 | -0.086716975 | 0.04810758  | 0.07712206 | 520 | 520 |
| CYP26C1   | -0.086731451 | 0.048070115 | 0.07708038 | 520 | 250 |
| PYDC1     | -0.086780486 | 0.047943388 | 0.07688329 | 520 | 291 |
| C18orf25  | -0.086805876 | 0.047877878 | 0.07680878 | 520 | 520 |
| GSTO2     | -0.086854103 | 0.047753656 | 0.07661559 | 520 | 520 |
| C3orf30   | -0.086929713 | 0.047559442 | 0.07632221 | 520 | 151 |
| RNF138    | -0.086956412 | 0.047491018 | 0.07622454 | 520 | 520 |
| ZFP36     | -0.086973588 | 0.047447048 | 0.07616609 | 520 | 520 |
| HELLS     | -0.086987298 | 0.047411971 | 0.07611584 | 520 | 520 |
| TRPM5     | -0.087018389 | 0.047332509 | 0.07600037 | 520 | 307 |
| FLYWCH1   | -0.087050234 | 0.047251237 | 0.07588196 | 520 | 520 |
| GGTLC1    | -0.087074236 | 0.047190057 | 0.07579447 | 520 | 474 |
| UCK2      | -0.087082064 | 0.047170119 | 0.0757698  | 520 | 520 |
| TIGD2     | -0.087120535 | 0.047072234 | 0.07563064 | 520 | 520 |
| ZNF157    | -0.087129756 | 0.047048796 | 0.07559901 | 520 | 347 |



|              |              |             |            |     |     |
|--------------|--------------|-------------|------------|-----|-----|
| CUTC         | -0.08715492  | 0.046984887 | 0.07550835 | 520 | 520 |
| FN3K         | -0.087158127 | 0.046976747 | 0.07550129 | 520 | 520 |
| LCE3D        | -0.087176771 | 0.046929453 | 0.07543129 | 520 | 515 |
| E2F6         | -0.087228577 | 0.04679824  | 0.07524438 | 520 | 520 |
| PPARD        | -0.08723743  | 0.04677585  | 0.07521437 | 520 | 520 |
| HIST1H2AE    | -0.087259018 | 0.046721286 | 0.07514072 | 520 | 519 |
| EML6         | -0.087262873 | 0.046711546 | 0.07513494 | 520 | 520 |
| TCF15        | -0.087274905 | 0.046681163 | 0.07511004 | 520 | 497 |
| C17orf96     | -0.087275945 | 0.046678538 | 0.07511004 | 520 | 520 |
| PHACTR4      | -0.0872921   | 0.046637773 | 0.0750522  | 520 | 520 |
| FAM89A       | -0.087334204 | 0.046531666 | 0.0748934  | 520 | 520 |
| ITGAE        | -0.087349925 | 0.046492101 | 0.07484764 | 520 | 520 |
| TTC12        | -0.087395685 | 0.046377095 | 0.07467442 | 520 | 520 |
| SCRT1        | -0.087425865 | 0.046301374 | 0.0745644  | 520 | 250 |
| BLCAP        | -0.087447132 | 0.046248079 | 0.07449048 | 520 | 520 |
| TUBB2A       | -0.087452949 | 0.046233512 | 0.07447296 | 520 | 520 |
| ELAC1        | -0.087460632 | 0.046214274 | 0.07445387 | 520 | 520 |
| LOC340074    | -0.087469338 | 0.046192485 | 0.07442471 | 520 | 177 |
| LOC100144603 | -0.08749493  | 0.046128486 | 0.07432754 | 520 | 520 |
| WBP2         | -0.087514277 | 0.046080151 | 0.07426152 | 520 | 520 |
| RAB9BP1      | -0.087540884 | 0.04601375  | 0.07416848 | 520 | 9   |
| ATOX1        | -0.087571143 | 0.045938331 | 0.07405664 | 520 | 520 |
| SERPINC1     | -0.087575897 | 0.045926493 | 0.07404348 | 520 | 461 |
| LOC646471    | -0.087599166 | 0.04586858  | 0.07395603 | 520 | 518 |
| DNAJC30      | -0.087605849 | 0.045851957 | 0.07393513 | 520 | 520 |
| FOSB         | -0.087639501 | 0.045768338 | 0.07381801 | 520 | 520 |
| EXOSC10      | -0.087642226 | 0.045761572 | 0.073813   | 520 | 520 |
| MAPK15       | -0.087652449 | 0.045736198 | 0.07377798 | 520 | 515 |
| C2orf66      | -0.087677949 | 0.045672957 | 0.07368186 | 520 | 432 |
| NPHS1        | -0.087720492 | 0.045567612 | 0.07351779 | 520 | 273 |
| CCDC6        | -0.087740538 | 0.045518045 | 0.0734437  | 520 | 520 |
| METTL13      | -0.087765682 | 0.045455937 | 0.07336109 | 520 | 520 |
| USP30        | -0.087783894 | 0.045410994 | 0.07329443 | 520 | 520 |
| SLC25A37     | -0.087787535 | 0.045402015 | 0.07329    | 520 | 520 |
| IRF9         | -0.087799459 | 0.045372616 | 0.07326181 | 520 | 520 |
| NXNL1        | -0.087802568 | 0.045364953 | 0.0732553  | 520 | 68  |
| CLINT1       | -0.087806884 | 0.045354316 | 0.07324399 | 520 | 520 |
| ANKRD5       | -0.087857843 | 0.045228896 | 0.07307656 | 520 | 520 |
| AKR1C4       | -0.087860324 | 0.045222796 | 0.07307256 | 520 | 141 |
| SILV         | -0.087891582 | 0.045146018 | 0.07296604 | 520 | 520 |
| KLHDC3       | -0.087895639 | 0.045136061 | 0.07296164 | 520 | 520 |
| TMEM164      | -0.087930236 | 0.045051223 | 0.07283034 | 520 | 520 |
| MRPS28       | -0.087961502 | 0.04497467  | 0.07271825 | 520 | 520 |
| RNFT2        | -0.087984832 | 0.044917619 | 0.07263183 | 520 | 520 |
| OPA3         | -0.088026561 | 0.044815724 | 0.07247287 | 520 | 520 |
| TAS2R60      | -0.088030664 | 0.044805718 | 0.0724625  | 520 | 281 |

|              |              |             |            |     |     |
|--------------|--------------|-------------|------------|-----|-----|
| PARP12       | -0.088044394 | 0.044772241 | 0.07241417 | 520 | 520 |
| MEI1         | -0.08808858  | 0.044664649 | 0.07224595 | 520 | 519 |
| LOC283761    | -0.088116918 | 0.044595759 | 0.07215188 | 520 | 271 |
| ABCC13       | -0.088142702 | 0.044533158 | 0.07206216 | 520 | 174 |
| MRPL3        | -0.088208186 | 0.0443745   | 0.07183425 | 520 | 520 |
| SNORA24      | -0.088253289 | 0.044265499 | 0.0716693  | 520 | 83  |
| MPL          | -0.088266196 | 0.044234347 | 0.07162462 | 520 | 519 |
| ADCK4        | -0.088268645 | 0.044228439 | 0.0716208  | 520 | 520 |
| TRIOBP       | -0.088278397 | 0.044204916 | 0.07158846 | 520 | 520 |
| VPS33A       | -0.088321868 | 0.044100193 | 0.07143034 | 520 | 520 |
| LYPLA2P1     | -0.088322993 | 0.044097487 | 0.07143034 | 520 | 520 |
| KRTAP10-9    | -0.088344284 | 0.044046273 | 0.0713602  | 520 | 19  |
| RNPEP        | -0.08837289  | 0.043977546 | 0.07126603 | 520 | 520 |
| CXCL1        | -0.088391672 | 0.043932471 | 0.07120443 | 520 | 520 |
| MTHFS        | -0.088435968 | 0.043826316 | 0.07106094 | 520 | 520 |
| G6PC         | -0.088440129 | 0.043816354 | 0.0710505  | 520 | 140 |
| MYBPC3       | -0.088448734 | 0.043795763 | 0.07102282 | 520 | 494 |
| HIST3H2A     | -0.088509418 | 0.043650769 | 0.07080994 | 520 | 519 |
| CASKIN1      | -0.088510163 | 0.043648991 | 0.07080994 | 520 | 497 |
| PRPF4B       | -0.088518261 | 0.043629675 | 0.07078764 | 520 | 520 |
| PET112L      | -0.088541174 | 0.043575056 | 0.07071609 | 520 | 520 |
| C2orf60      | -0.08855481  | 0.043542579 | 0.07066907 | 520 | 520 |
| ZNF780A      | -0.088575842 | 0.043492526 | 0.0705992  | 520 | 520 |
| CYP2A6       | -0.088635952 | 0.043349742 | 0.0703901  | 520 | 228 |
| RBM23        | -0.088643399 | 0.04333208  | 0.07036748 | 520 | 520 |
| BCL6         | -0.088655252 | 0.04330398  | 0.07033278 | 520 | 520 |
| CCDC79       | -0.088678282 | 0.043249429 | 0.07024984 | 520 | 85  |
| KRTAP5-6     | -0.088713511 | 0.043166092 | 0.07012577 | 520 | 86  |
| PRSS37       | -0.08871654  | 0.043158934 | 0.07011979 | 520 | 133 |
| FTSJ3        | -0.088759747 | 0.043056923 | 0.06995969 | 520 | 520 |
| BAIAP2L1     | -0.088769253 | 0.043034507 | 0.06992891 | 520 | 520 |
| EPN1         | -0.088779177 | 0.043011116 | 0.06990216 | 520 | 520 |
| YARS         | -0.08879224  | 0.042980344 | 0.06985778 | 520 | 520 |
| DLX6         | -0.088796833 | 0.042969528 | 0.06984583 | 520 | 514 |
| OR6V1        | -0.088830608 | 0.042890065 | 0.06972791 | 520 | 19  |
| OR4C3        | -0.088840778 | 0.042866162 | 0.06969467 | 520 | 21  |
| TRIM35       | -0.088862849 | 0.042814326 | 0.06962162 | 520 | 520 |
| NPPC         | -0.088863709 | 0.042812309 | 0.06962162 | 520 | 289 |
| EHMT2        | -0.088876973 | 0.042781182 | 0.06958456 | 520 | 520 |
| RLTPR        | -0.088879767 | 0.042774628 | 0.06957951 | 520 | 520 |
| SNF8         | -0.08888734  | 0.042756869 | 0.06955623 | 520 | 520 |
| OR4K5        | -0.088897664 | 0.042732668 | 0.06953369 | 520 | 12  |
| LOC100240735 | -0.088907568 | 0.042709462 | 0.06950154 | 520 | 407 |
| FIZ1         | -0.088923464 | 0.042672239 | 0.06945218 | 520 | 520 |
| VPREB3       | -0.088980625 | 0.042538613 | 0.06924587 | 520 | 501 |
| DSCC1        | -0.08903052  | 0.042422259 | 0.06906204 | 520 | 520 |

|              |              |             |            |     |     |
|--------------|--------------|-------------|------------|-----|-----|
| PCDH1        | -0.089032967 | 0.042416561 | 0.06905834 | 520 | 520 |
| C17orf73     | -0.089059804 | 0.042354096 | 0.06897335 | 520 | 46  |
| ALOX15B      | -0.089086379 | 0.042292319 | 0.06887831 | 520 | 519 |
| LOC100134713 | -0.089111851 | 0.042233177 | 0.0687931  | 520 | 520 |
| DGCR10       | -0.089127331 | 0.042197267 | 0.06874016 | 520 | 335 |
| PSKH2        | -0.089137008 | 0.042174833 | 0.06872027 | 520 | 41  |
| BTBD11       | -0.089229187 | 0.041961638 | 0.06839499 | 520 | 520 |
| PBOV1        | -0.089257244 | 0.041896928 | 0.06830056 | 520 | 41  |
| TDG          | -0.089348059 | 0.04168805  | 0.06798203 | 520 | 520 |
| PLA2G10      | -0.08936927  | 0.041639391 | 0.06790818 | 520 | 469 |
| MGC29506     | -0.089384292 | 0.041604959 | 0.06785751 | 520 | 519 |
| PREB         | -0.089403335 | 0.041561344 | 0.06779734 | 520 | 520 |
| FAM169B      | -0.089424745 | 0.041512353 | 0.06772838 | 520 | 121 |
| C12orf50     | -0.089431441 | 0.041497044 | 0.06771391 | 520 | 197 |
| DHDPSL       | -0.089434189 | 0.04149076  | 0.06770959 | 520 | 512 |
| C9orf167     | -0.089479893 | 0.041386391 | 0.06756114 | 520 | 520 |
| SMPDL3A      | -0.089484553 | 0.041375763 | 0.06754926 | 520 | 520 |
| MYC          | -0.089485301 | 0.041374057 | 0.06754926 | 520 | 520 |
| SULT1A1      | -0.089490889 | 0.041361314 | 0.06753661 | 520 | 520 |
| SGSM2        | -0.089550614 | 0.041225332 | 0.06734183 | 520 | 520 |
| C22orf43     | -0.089600946 | 0.041111027 | 0.06716056 | 520 | 337 |
| METTL6       | -0.089628167 | 0.04104932  | 0.06706518 | 520 | 520 |
| HINT2        | -0.089712096 | 0.040859555 | 0.06677138 | 520 | 520 |
| HHLA3        | -0.089743821 | 0.040788017 | 0.06666528 | 520 | 520 |
| PRSS45       | -0.089825648 | 0.04060399  | 0.06640756 | 520 | 180 |
| PSMB9        | -0.089827787 | 0.040599189 | 0.0664051  | 520 | 520 |
| DTL          | -0.089828184 | 0.040598299 | 0.0664051  | 520 | 520 |
| PPP1R16A     | -0.089846836 | 0.040556454 | 0.06634596 | 520 | 520 |
| FOLR4        | -0.089868233 | 0.040508497 | 0.06627289 | 520 | 96  |
| MTHFSD       | -0.089892907 | 0.040453253 | 0.06618788 | 520 | 520 |
| SYNGR1       | -0.089926742 | 0.040377603 | 0.06606946 | 520 | 520 |
| LOC147727    | -0.089929131 | 0.040372266 | 0.06606609 | 520 | 520 |
| BUB1B        | -0.089974922 | 0.040270085 | 0.06592028 | 520 | 520 |
| ANKS6        | -0.089977549 | 0.040264231 | 0.06591605 | 520 | 520 |
| ANKS4B       | -0.089981634 | 0.040255127 | 0.06590649 | 520 | 240 |
| SCARNA16     | -0.089996163 | 0.040222762 | 0.0658642  | 520 | 282 |
| ZNF207       | -0.090017218 | 0.0401759   | 0.06579815 | 520 | 520 |
| BAD          | -0.090023684 | 0.040161517 | 0.06577994 | 520 | 520 |
| FANK1        | -0.090041969 | 0.040120869 | 0.06572404 | 520 | 520 |
| OR8B3        | -0.090070912 | 0.040056599 | 0.06562942 | 520 | 6   |
| LOC400027    | -0.090100071 | 0.039991938 | 0.0655288  | 520 | 520 |
| ZSWIM1       | -0.090145393 | 0.039891609 | 0.06537503 | 520 | 520 |
| OXA1L        | -0.090145722 | 0.039890881 | 0.06537503 | 520 | 520 |
| SAAL1        | -0.090149381 | 0.039882792 | 0.06537121 | 520 | 520 |
| C10orf91     | -0.090178496 | 0.039818465 | 0.06527108 | 520 | 514 |
| C1orf141     | -0.090179898 | 0.039815369 | 0.06527108 | 520 | 67  |

|           |              |             |            |     |     |
|-----------|--------------|-------------|------------|-----|-----|
| C20orf107 | -0.090208761 | 0.039751691 | 0.06517222 | 520 | 470 |
| SEC14L3   | -0.090230893 | 0.039702921 | 0.06509755 | 520 | 70  |
| PDZD9     | -0.090231588 | 0.039701389 | 0.06509755 | 520 | 280 |
| TM4SF1    | -0.0902415   | 0.039679565 | 0.06506984 | 520 | 520 |
| LYSMD1    | -0.090313485 | 0.039521366 | 0.06484205 | 520 | 520 |
| SPINK2    | -0.090328696 | 0.039488005 | 0.06479659 | 520 | 455 |
| OR1D4     | -0.090333199 | 0.039478135 | 0.06478694 | 520 | 83  |
| TMEM99    | -0.090373524 | 0.039389829 | 0.06465254 | 520 | 520 |
| CYP2C8    | -0.090381533 | 0.03937231  | 0.06463431 | 520 | 428 |
| C5orf48   | -0.090396739 | 0.039339068 | 0.064585   | 520 | 18  |
| PYCR2     | -0.090399348 | 0.039333366 | 0.0645809  | 520 | 520 |
| LOC29034  | -0.09043818  | 0.039248591 | 0.06444695 | 520 | 15  |
| DYNC2LI1  | -0.090474167 | 0.039170166 | 0.06432342 | 520 | 520 |
| CHIC2     | -0.090502414 | 0.039108703 | 0.06422771 | 520 | 520 |
| SMCR7     | -0.090522599 | 0.039064829 | 0.06416611 | 520 | 520 |
| HAS3      | -0.090551434 | 0.039002229 | 0.06406851 | 520 | 520 |
| RSPH10B2  | -0.090552167 | 0.039000639 | 0.06406851 | 520 | 463 |
| CNPY2     | -0.090592556 | 0.038913101 | 0.06394294 | 520 | 520 |
| SMNDC1    | -0.090593924 | 0.038910137 | 0.06394294 | 520 | 520 |
| DLX5      | -0.090615027 | 0.038864469 | 0.06387343 | 520 | 520 |
| WNT8A     | -0.090650883 | 0.038786977 | 0.06375127 | 520 | 55  |
| MEAF6     | -0.090670269 | 0.038745136 | 0.06369288 | 520 | 520 |
| ATP11B    | -0.090688118 | 0.038706644 | 0.0636348  | 520 | 520 |
| C22orf39  | -0.090756402 | 0.038559689 | 0.06340354 | 520 | 520 |
| NAB1      | -0.090770223 | 0.038530001 | 0.06335989 | 520 | 520 |
| TMEM219   | -0.0907828   | 0.038503005 | 0.06332582 | 520 | 520 |
| C16orf11  | -0.090791245 | 0.038484886 | 0.06330119 | 520 | 260 |
| VPS28     | -0.090811229 | 0.038442037 | 0.06324618 | 520 | 520 |
| ACCN3     | -0.090908089 | 0.038234933 | 0.06291572 | 520 | 516 |
| AUP1      | -0.090911739 | 0.038227147 | 0.06290804 | 520 | 520 |
| TRMT112   | -0.0909286   | 0.038191197 | 0.06285914 | 520 | 520 |
| FGFR1OP   | -0.090938781 | 0.038169505 | 0.06283369 | 520 | 520 |
| SPCS1     | -0.090971596 | 0.038099655 | 0.06272383 | 520 | 520 |
| CCDC129   | -0.090980524 | 0.03808067  | 0.06270281 | 520 | 244 |
| GPBP1L1   | -0.091009877 | 0.03801831  | 0.06260524 | 520 | 520 |
| MUDENG    | -0.091070572 | 0.037889636 | 0.06240864 | 520 | 520 |
| ZNF620    | -0.091255376 | 0.037500123 | 0.06180746 | 520 | 518 |
| PIGH      | -0.091278964 | 0.037450652 | 0.06173097 | 520 | 520 |
| CELA3B    | -0.091347187 | 0.03730788  | 0.06151575 | 520 | 106 |
| DIP2A     | -0.091442768 | 0.037108633 | 0.06120223 | 520 | 520 |
| NFKBID    | -0.091459651 | 0.037073531 | 0.06115434 | 520 | 520 |
| RNF25     | -0.091466363 | 0.037059585 | 0.06113634 | 520 | 520 |
| IDO1      | -0.091482558 | 0.037025953 | 0.06109085 | 520 | 520 |
| OR4C12    | -0.091531857 | 0.03692373  | 0.06093216 | 520 | 19  |
| NWD1      | -0.091550639 | 0.03688485  | 0.06087298 | 520 | 504 |
| C4orf44   | -0.09157284  | 0.036838935 | 0.06080218 | 520 | 486 |

|           |              |             |            |     |     |
|-----------|--------------|-------------|------------|-----|-----|
| ZMYND10   | -0.091575219 | 0.036834017 | 0.06079904 | 520 | 516 |
| TAS2R41   | -0.091616664 | 0.036748444 | 0.0606727  | 520 | 32  |
| SOCS1     | -0.091621422 | 0.036738631 | 0.06066146 | 520 | 520 |
| HBQ1      | -0.091638227 | 0.03670399  | 0.06061419 | 520 | 216 |
| DBNDD2    | -0.09173919  | 0.036496445 | 0.06029119 | 520 | 520 |
| FFAR1     | -0.091779148 | 0.036414582 | 0.06016582 | 520 | 94  |
| DLG1      | -0.091804    | 0.036363746 | 0.06009167 | 520 | 520 |
| FMO6P     | -0.091833621 | 0.036303232 | 0.05999659 | 520 | 328 |
| METTL3    | -0.091852336 | 0.036265043 | 0.0599433  | 520 | 520 |
| CCDC57    | -0.091955847 | 0.036054441 | 0.05960496 | 520 | 520 |
| LTV1      | -0.091968156 | 0.036029465 | 0.05956856 | 520 | 520 |
| LCE3A     | -0.091982833 | 0.035999707 | 0.05952424 | 520 | 424 |
| NKX6-3    | -0.091988996 | 0.035987217 | 0.05950847 | 520 | 55  |
| LMNA      | -0.092018029 | 0.035928426 | 0.05941612 | 520 | 520 |
| POU5F2    | -0.092027497 | 0.035909272 | 0.05938932 | 520 | 209 |
| TIPRL     | -0.092053267 | 0.035857181 | 0.05930803 | 520 | 520 |
| C6orf118  | -0.092070076 | 0.035823239 | 0.05925675 | 520 | 226 |
| NUP88     | -0.092079929 | 0.035803355 | 0.05923141 | 520 | 520 |
| CPLX1     | -0.092083451 | 0.035796251 | 0.05922668 | 520 | 520 |
| RAB7A     | -0.092100965 | 0.035760935 | 0.05918768 | 520 | 520 |
| LOC341056 | -0.092121062 | 0.035720449 | 0.05912552 | 520 | 520 |
| GSTTP2    | -0.092213929 | 0.035533872 | 0.05883118 | 520 | 37  |
| GATSL3    | -0.092236221 | 0.035489208 | 0.05876689 | 520 | 520 |
| TMEM55B   | -0.092274685 | 0.035412256 | 0.05864909 | 520 | 520 |
| FAM63A    | -0.092309186 | 0.035343353 | 0.05855422 | 520 | 520 |
| FGFR4     | -0.092352194 | 0.035257622 | 0.05844099 | 520 | 520 |
| DBNL      | -0.092370726 | 0.035220733 | 0.05838947 | 520 | 520 |
| WDR89     | -0.092407673 | 0.03514729  | 0.05828686 | 520 | 520 |
| LAMP3     | -0.092415967 | 0.035130822 | 0.05827065 | 520 | 520 |
| DGKE      | -0.0924409   | 0.035081352 | 0.05819666 | 520 | 520 |
| KNTC1     | -0.092484929 | 0.03499414  | 0.05805676 | 520 | 520 |
| INPP5B    | -0.092551252 | 0.034863119 | 0.05784891 | 520 | 520 |
| MIF       | -0.092577053 | 0.03481226  | 0.05777403 | 520 | 520 |
| LZIC      | -0.092615281 | 0.034737024 | 0.05765391 | 520 | 520 |
| C7orf53   | -0.092632997 | 0.034702203 | 0.0576056  | 520 | 520 |
| HSFX2     | -0.092662141 | 0.034644987 | 0.05751536 | 520 | 520 |
| FKSG73    | -0.092699311 | 0.03457213  | 0.05740858 | 520 | 22  |
| IGFBP2    | -0.092740942 | 0.034490685 | 0.05728749 | 520 | 520 |
| C3orf47   | -0.092754165 | 0.03446485  | 0.05725401 | 520 | 520 |
| FOS       | -0.092758478 | 0.034456427 | 0.05724474 | 520 | 520 |
| C1orf175  | -0.092806437 | 0.034362883 | 0.05710344 | 520 | 517 |
| TSIX      | -0.092811029 | 0.034353937 | 0.05709328 | 520 | 336 |
| C1orf83   | -0.092905393 | 0.034170554 | 0.05681193 | 520 | 520 |
| KIAA1712  | -0.092930992 | 0.03412095  | 0.05673881 | 520 | 520 |
| PCYOX1L   | -0.09295597  | 0.034072607 | 0.0566718  | 520 | 520 |
| KRTAP10-3 | -0.092988931 | 0.034008905 | 0.05658049 | 520 | 24  |

|              |              |             |            |     |     |
|--------------|--------------|-------------|------------|-----|-----|
| MBD6         | -0.092990338 | 0.034006188 | 0.05658049 | 520 | 520 |
| RNASE13      | -0.09299899  | 0.033989485 | 0.05656218 | 520 | 181 |
| TSPAN6       | -0.093019347 | 0.03395021  | 0.05650149 | 520 | 520 |
| ERP27        | -0.093019587 | 0.033949748 | 0.05650149 | 520 | 519 |
| GUCY1B2      | -0.093027461 | 0.033934567 | 0.05648847 | 520 | 466 |
| SLC5A11      | -0.093050302 | 0.033890565 | 0.05643017 | 520 | 375 |
| CAPG         | -0.093076874 | 0.033839436 | 0.05635434 | 520 | 520 |
| LOC730101    | -0.093092384 | 0.033809624 | 0.05630935 | 520 | 518 |
| SCD          | -0.093095524 | 0.03380359  | 0.05630395 | 520 | 520 |
| RCOR1        | -0.093103727 | 0.033787834 | 0.05628235 | 520 | 520 |
| CXorf42      | -0.09311167  | 0.033772584 | 0.05626625 | 520 | 520 |
| UTP14A       | -0.09317337  | 0.033654316 | 0.05607848 | 520 | 520 |
| C18orf8      | -0.093234777 | 0.033536962 | 0.05589216 | 520 | 520 |
| CLDN1        | -0.09325215  | 0.033503824 | 0.05584617 | 520 | 520 |
| LOC407835    | -0.093281367 | 0.033448158 | 0.0557626  | 520 | 520 |
| CSRP2        | -0.093370085 | 0.033279606 | 0.05549537 | 520 | 520 |
| SPTBN5       | -0.093375523 | 0.033269298 | 0.05548277 | 520 | 520 |
| ALOX12P2     | -0.09344849  | 0.033131253 | 0.05526626 | 520 | 515 |
| PLA2G2E      | -0.093451492 | 0.033125585 | 0.05526138 | 520 | 22  |
| ZIM3         | -0.093550908 | 0.032938315 | 0.05497626 | 520 | 96  |
| PLA2G12A     | -0.093552386 | 0.032935537 | 0.05497617 | 520 | 520 |
| BRF1         | -0.093615634 | 0.032816877 | 0.05478718 | 520 | 520 |
| NCRNA00112   | -0.093639994 | 0.032771272 | 0.0547201  | 520 | 23  |
| HOXB13       | -0.093640196 | 0.032770893 | 0.0547201  | 520 | 407 |
| HS3ST4       | -0.093643308 | 0.032765071 | 0.05471881 | 520 | 389 |
| GLRX5        | -0.093648736 | 0.032754919 | 0.05470639 | 520 | 520 |
| FAM45A       | -0.09367879  | 0.032698752 | 0.05462163 | 520 | 520 |
| TFG          | -0.093681081 | 0.032694474 | 0.054619   | 520 | 520 |
| MAP3K9       | -0.09371352  | 0.03263395  | 0.05452693 | 520 | 520 |
| OR8H1        | -0.093744532 | 0.032576178 | 0.05443942 | 520 | 8   |
| OR2A4        | -0.093775702 | 0.0325182   | 0.05435154 | 520 | 517 |
| RAD17        | -0.09379162  | 0.032488624 | 0.05430661 | 520 | 520 |
| GALNTL5      | -0.093821912 | 0.032432407 | 0.05421713 | 520 | 13  |
| OR14I1       | -0.093824105 | 0.032428341 | 0.05421483 | 520 | 31  |
| YTHDC2       | -0.093853448 | 0.03237397  | 0.05412842 | 520 | 520 |
| TTC24        | -0.093853973 | 0.032372998 | 0.05412842 | 520 | 440 |
| PTOV1        | -0.093858116 | 0.032365328 | 0.05412294 | 520 | 520 |
| LOC388428    | -0.09394045  | 0.032213216 | 0.05387751 | 520 | 56  |
| ALAD         | -0.093958374 | 0.032180184 | 0.05382673 | 520 | 520 |
| SEPW1        | -0.093977679 | 0.032144638 | 0.0537762  | 520 | 520 |
| GNG8         | -0.094039535 | 0.032030969 | 0.05359378 | 520 | 211 |
| LOC388387    | -0.094066992 | 0.031980625 | 0.05351513 | 520 | 96  |
| C12orf52     | -0.094071731 | 0.031971941 | 0.05350504 | 520 | 520 |
| ATHL1        | -0.094110255 | 0.031901433 | 0.05341364 | 520 | 520 |
| GRIA4        | -0.094120796 | 0.031882165 | 0.05338581 | 520 | 296 |
| LOC100131193 | -0.094146102 | 0.031835945 | 0.05331285 | 520 | 518 |

|           |              |             |            |     |     |
|-----------|--------------|-------------|------------|-----|-----|
| TOB1      | -0.094152121 | 0.03182496  | 0.05329888 | 520 | 520 |
| GCOM1     | -0.09418312  | 0.031768439 | 0.05320864 | 520 | 518 |
| ALDH2     | -0.094217188 | 0.031706419 | 0.05310917 | 520 | 520 |
| C6orf221  | -0.094242493 | 0.03166042  | 0.05304094 | 520 | 148 |
| KRTAP4-9  | -0.094290365 | 0.031573553 | 0.0529086  | 520 | 46  |
| CUL2      | -0.094291917 | 0.03157074  | 0.05290828 | 520 | 520 |
| C1orf61   | -0.09430504  | 0.031546965 | 0.05287283 | 520 | 440 |
| CDK2AP2   | -0.094324076 | 0.031512504 | 0.05281946 | 520 | 520 |
| CAPNS1    | -0.09436133  | 0.031445159 | 0.05271973 | 520 | 520 |
| EHHADH    | -0.094366339 | 0.031436113 | 0.05270895 | 520 | 520 |
| PIGL      | -0.09436728  | 0.031434414 | 0.05270895 | 520 | 520 |
| OR6S1     | -0.094375062 | 0.031420366 | 0.05269131 | 520 | 38  |
| RING1     | -0.094515332 | 0.031168064 | 0.05228994 | 520 | 520 |
| GALK1     | -0.094532414 | 0.031137457 | 0.05224294 | 520 | 520 |
| KRTAP10-4 | -0.094540864 | 0.031122327 | 0.0522219  | 520 | 36  |
| PIGP      | -0.094585976 | 0.031041654 | 0.05209087 | 520 | 520 |
| BAG5      | -0.094601483 | 0.031013966 | 0.05204874 | 520 | 520 |
| DPRXP4    | -0.094607113 | 0.031003919 | 0.05203621 | 520 | 476 |
| SNRNP48   | -0.094627016 | 0.03096842  | 0.05198096 | 520 | 520 |
| CDKN2AIP  | -0.094682348 | 0.030869917 | 0.05182856 | 520 | 520 |
| GLDC      | -0.094699162 | 0.030840036 | 0.0517827  | 520 | 519 |
| SLC22A6   | -0.09475644  | 0.030738436 | 0.05162501 | 520 | 72  |
| ADAMTS17  | -0.094762417 | 0.030727851 | 0.05161583 | 520 | 520 |
| RINL      | -0.09476811  | 0.030717771 | 0.05160319 | 520 | 520 |
| FLJ23867  | -0.094792612 | 0.030674421 | 0.05153466 | 520 | 520 |
| SCARNA2   | -0.094828165 | 0.030611613 | 0.05143771 | 520 | 495 |
| LOR       | -0.094837681 | 0.030594819 | 0.05141378 | 520 | 426 |
| STK16     | -0.094843546 | 0.030584475 | 0.05140496 | 520 | 520 |
| TOMM20    | -0.094908352 | 0.030470358 | 0.05122597 | 520 | 520 |
| ADCK2     | -0.094909451 | 0.030468426 | 0.05122597 | 520 | 520 |
| DCTN5     | -0.094915275 | 0.030458188 | 0.05121405 | 520 | 520 |
| NQO1      | -0.094915984 | 0.030456943 | 0.05121405 | 520 | 520 |
| SLC22A12  | -0.094944813 | 0.030406314 | 0.05113962 | 520 | 59  |
| MTFMT     | -0.094970772 | 0.030360787 | 0.05107157 | 520 | 520 |
| HNF1B     | -0.094985387 | 0.030335182 | 0.05103276 | 520 | 277 |
| PHYHD1    | -0.094999569 | 0.030310352 | 0.05099524 | 520 | 520 |
| MT3       | -0.095038351 | 0.030242542 | 0.0508854  | 520 | 378 |
| SCARNA18  | -0.095045832 | 0.030229476 | 0.05087867 | 520 | 8   |
| KRTAP4-8  | -0.095056271 | 0.030211252 | 0.05085397 | 520 | 114 |
| C4orf14   | -0.095075144 | 0.030178329 | 0.05081127 | 520 | 520 |
| DNAH3     | -0.095084365 | 0.030162255 | 0.05078845 | 520 | 518 |
| TTC39B    | -0.095123908 | 0.030093405 | 0.05067675 | 520 | 520 |
| FBXO27    | -0.095133579 | 0.030076587 | 0.05065266 | 520 | 520 |
| PIP5KL1   | -0.095156467 | 0.030036817 | 0.05059413 | 520 | 520 |
| FABP5     | -0.095196542 | 0.029967289 | 0.05048546 | 520 | 520 |
| BAX       | -0.09520665  | 0.029949775 | 0.05046017 | 520 | 520 |

|            |              |             |            |     |     |
|------------|--------------|-------------|------------|-----|-----|
| SPR        | -0.095222152 | 0.029922931 | 0.05042758 | 520 | 520 |
| DNAJB11    | -0.095234152 | 0.029902166 | 0.0503968  | 520 | 520 |
| ZBTB17     | -0.095318376 | 0.029756766 | 0.05016851 | 520 | 520 |
| MGC70857   | -0.095327458 | 0.029741123 | 0.05014633 | 520 | 520 |
| CABP7      | -0.095338265 | 0.029722518 | 0.05011916 | 520 | 520 |
| C6orf141   | -0.095389489 | 0.029634472 | 0.04999577 | 520 | 517 |
| C10orf125  | -0.095398493 | 0.029619019 | 0.04997389 | 520 | 520 |
| CFB        | -0.095448639 | 0.029533081 | 0.04983306 | 520 | 520 |
| DLGAP5     | -0.095449771 | 0.029531142 | 0.04983306 | 520 | 520 |
| NCRNA00158 | -0.095509295 | 0.029429416 | 0.04967676 | 520 | 289 |
| FABP12     | -0.09552903  | 0.029395756 | 0.04962626 | 520 | 261 |
| CYP4F11    | -0.095542757 | 0.029372362 | 0.04959507 | 520 | 518 |
| CIAPIN1    | -0.095568962 | 0.029327746 | 0.04952803 | 520 | 520 |
| CCL15      | -0.095625502 | 0.029231683 | 0.04937407 | 520 | 196 |
| C3orf33    | -0.095644308 | 0.029199792 | 0.04932434 | 520 | 520 |
| YSK4       | -0.095661095 | 0.029171349 | 0.04928868 | 520 | 274 |
| SERPINF2   | -0.095698366 | 0.029108284 | 0.04919036 | 520 | 520 |
| SIRT3      | -0.09570012  | 0.02910532  | 0.04918948 | 520 | 520 |
| TIFA       | -0.095725428 | 0.029062568 | 0.04912134 | 520 | 520 |
| PRKD2      | -0.095743114 | 0.029032722 | 0.04907501 | 520 | 520 |
| WNT3A      | -0.095783682 | 0.028964365 | 0.04896767 | 520 | 518 |
| C17orf95   | -0.095807807 | 0.028923779 | 0.04890316 | 520 | 520 |
| KLRK1      | -0.095838303 | 0.028872546 | 0.04882472 | 520 | 519 |
| CFTR       | -0.095852894 | 0.028848061 | 0.04878741 | 520 | 387 |
| WDR83      | -0.09586074  | 0.028834901 | 0.04876925 | 520 | 520 |
| PMPCB      | -0.095926337 | 0.028725084 | 0.04859574 | 520 | 520 |
| C9orf98    | -0.095929278 | 0.028720169 | 0.0485915  | 520 | 518 |
| BAIAP2L2   | -0.095940956 | 0.028700659 | 0.04856664 | 520 | 520 |
| OR5A2      | -0.095950057 | 0.028685462 | 0.048545   | 520 | 9   |
| KRT10      | -0.095982076 | 0.028632053 | 0.04846275 | 520 | 520 |
| TLR5       | -0.096070405 | 0.028485158 | 0.04823436 | 520 | 520 |
| POC1B      | -0.096111555 | 0.028416946 | 0.04812694 | 520 | 520 |
| EFNA5      | -0.096122137 | 0.028399427 | 0.04810131 | 520 | 520 |
| SNORA68    | -0.096138288 | 0.028372707 | 0.04806816 | 520 | 36  |
| EPX        | -0.096144837 | 0.028361878 | 0.04805385 | 520 | 333 |
| HAT1       | -0.096175536 | 0.028311165 | 0.04797196 | 520 | 520 |
| TADA2A     | -0.096301657 | 0.028103638 | 0.04764033 | 520 | 520 |
| CD2BP2     | -0.096345602 | 0.028031636 | 0.04753027 | 520 | 520 |
| OLAH       | -0.096365943 | 0.027998362 | 0.04747784 | 520 | 417 |
| USP15      | -0.096400295 | 0.027942246 | 0.04738667 | 520 | 520 |
| PRODH2     | -0.096426925 | 0.027898811 | 0.04731698 | 520 | 51  |
| ZFYVE27    | -0.096440312 | 0.027876998 | 0.04728397 | 520 | 520 |
| ZNF815     | -0.096449193 | 0.027862535 | 0.04726394 | 520 | 520 |
| TAGLN2     | -0.09645424  | 0.027854318 | 0.04725742 | 520 | 520 |
| AP1AR      | -0.096504686 | 0.027772309 | 0.0471335  | 520 | 520 |
| IKBKAP     | -0.096564973 | 0.027674573 | 0.04698014 | 520 | 520 |



|              |              |             |            |     |     |
|--------------|--------------|-------------|------------|-----|-----|
| LOC100128811 | -0.096567314 | 0.027670785 | 0.04697766 | 520 | 69  |
| CRADD        | -0.0965742   | 0.027659642 | 0.0469627  | 520 | 520 |
| PIGZ         | -0.096582867 | 0.027645621 | 0.04694285 | 520 | 520 |
| LOC144742    | -0.096585164 | 0.027641907 | 0.04694049 | 520 | 25  |
| DNPEP        | -0.096587037 | 0.027638878 | 0.0469393  | 520 | 520 |
| CCDC115      | -0.096597771 | 0.027621527 | 0.04691379 | 520 | 520 |
| GPR126       | -0.096606492 | 0.027607437 | 0.0468938  | 520 | 520 |
| SAG          | -0.096640857 | 0.027551974 | 0.04680748 | 520 | 71  |
| C21orf54     | -0.09669053  | 0.027471974 | 0.04667944 | 520 | 6   |
| KCNS1        | -0.096703051 | 0.027451841 | 0.04664916 | 520 | 483 |
| PFDN1        | -0.096706593 | 0.027446148 | 0.04664342 | 520 | 520 |
| LOC284023    | -0.096764973 | 0.027352456 | 0.04649595 | 520 | 520 |
| RORC         | -0.096774775 | 0.027336752 | 0.04647317 | 520 | 520 |
| CCDC159      | -0.096776376 | 0.027334188 | 0.04647273 | 520 | 520 |
| TMEM126A     | -0.096797591 | 0.027300229 | 0.04641891 | 520 | 520 |
| LACTB2       | -0.096835091 | 0.027240291 | 0.0463209  | 520 | 520 |
| CXorf59      | -0.096919898 | 0.027105156 | 0.04611055 | 520 | 147 |
| CDK5RAP2     | -0.096950393 | 0.027056706 | 0.04603201 | 520 | 520 |
| LOC339240    | -0.09698361  | 0.027004017 | 0.04594625 | 520 | 243 |
| RNF170       | -0.096984139 | 0.027003178 | 0.04594625 | 520 | 520 |
| C6orf227     | -0.096997127 | 0.0269826   | 0.04592531 | 520 | 286 |
| OCM          | -0.097052577 | 0.026894901 | 0.04578377 | 520 | 267 |
| CDKN2A       | -0.097089476 | 0.026836677 | 0.04569623 | 520 | 520 |
| UPF2         | -0.097109823 | 0.026804617 | 0.04565321 | 520 | 520 |
| KIAA1804     | -0.097140735 | 0.026755974 | 0.04557647 | 520 | 520 |
| LOC100130557 | -0.09714224  | 0.026753607 | 0.04557647 | 520 | 518 |
| C2orf63      | -0.097188961 | 0.026680238 | 0.04547209 | 520 | 520 |
| ATF7IP2      | -0.097196259 | 0.026668792 | 0.04545643 | 520 | 520 |
| CDCA4        | -0.097237115 | 0.026604798 | 0.04535502 | 520 | 520 |
| OR9I1        | -0.097277674 | 0.0265414   | 0.04525076 | 520 | 35  |
| OR2T5        | -0.097308401 | 0.026493457 | 0.04517496 | 520 | 27  |
| PSME3        | -0.097314946 | 0.026483254 | 0.04516309 | 520 | 520 |
| PGGT1B       | -0.097393278 | 0.026361412 | 0.04497813 | 520 | 520 |
| LOC731779    | -0.097442948 | 0.026284402 | 0.04486192 | 520 | 106 |
| PPP1R13L     | -0.097459274 | 0.026259133 | 0.04482638 | 520 | 520 |
| USP7         | -0.097526497 | 0.026155303 | 0.04466047 | 520 | 520 |
| SF3B4        | -0.097548004 | 0.02612216  | 0.04461521 | 520 | 520 |
| OR5J2        | -0.097564498 | 0.026096767 | 0.04457562 | 520 | 16  |
| LCE1C        | -0.097587855 | 0.026060842 | 0.0445218  | 520 | 491 |
| NRN1L        | -0.097594974 | 0.026049902 | 0.04450688 | 520 | 450 |
| MRPS30       | -0.097628142 | 0.02599898  | 0.04442741 | 520 | 520 |
| SNORD97      | -0.097666167 | 0.025940708 | 0.04433535 | 520 | 125 |
| PARD6G       | -0.09770674  | 0.025878655 | 0.04425055 | 520 | 520 |
| TRIM16L      | -0.097709596 | 0.025874292 | 0.04424809 | 520 | 520 |
| ARFIP2       | -0.097817002 | 0.025710664 | 0.04398319 | 520 | 520 |
| HIST1H2AL    | -0.09781996  | 0.025706169 | 0.04397923 | 520 | 490 |

|          |              |             |            |     |     |
|----------|--------------|-------------|------------|-----|-----|
| IYD      | -0.097840723 | 0.025674647 | 0.04392903 | 520 | 391 |
| CCDC66   | -0.097844161 | 0.02566943  | 0.04392383 | 520 | 520 |
| OGFRL1   | -0.097853201 | 0.025655717 | 0.04390409 | 520 | 520 |
| UNKL     | -0.097863054 | 0.025640779 | 0.04388225 | 520 | 520 |
| TLX1     | -0.097905188 | 0.025576985 | 0.0437805  | 520 | 357 |
| POMT1    | -0.097948402 | 0.025511697 | 0.04367616 | 520 | 520 |
| BUD13    | -0.097959829 | 0.025494456 | 0.04365406 | 520 | 520 |
| D4S234E  | -0.097977059 | 0.02546848  | 0.04361329 | 520 | 520 |
| AGPAT5   | -0.097994198 | 0.025442665 | 0.04357648 | 520 | 520 |
| DTD1     | -0.098017096 | 0.025408209 | 0.04352856 | 520 | 520 |
| USP1     | -0.098055388 | 0.025350679 | 0.04343738 | 520 | 520 |
| RAPGEF3  | -0.098059923 | 0.025343874 | 0.04342941 | 520 | 520 |
| FAM133B  | -0.098066196 | 0.025334463 | 0.04341697 | 520 | 520 |
| RBMXL3   | -0.098095254 | 0.025290904 | 0.04335338 | 520 | 36  |
| POU2AF1  | -0.098139437 | 0.025224799 | 0.04325845 | 520 | 519 |
| POLH     | -0.098157643 | 0.025197603 | 0.04322284 | 520 | 520 |
| PPP1R8   | -0.098162827 | 0.025189864 | 0.04321324 | 520 | 520 |
| HDAC2    | -0.098227071 | 0.025094124 | 0.04305632 | 520 | 520 |
| PELP1    | -0.09826038  | 0.02504461  | 0.04297868 | 520 | 520 |
| FBXO42   | -0.098266483 | 0.025035546 | 0.04296678 | 520 | 520 |
| ALDOC    | -0.098327066 | 0.024945733 | 0.04282358 | 520 | 520 |
| IQCJ     | -0.098354517 | 0.024905128 | 0.04276116 | 520 | 57  |
| RALY     | -0.098375598 | 0.024873984 | 0.04271496 | 520 | 520 |
| SCRIB    | -0.098391432 | 0.024850614 | 0.04268209 | 520 | 520 |
| MKI67IP  | -0.098399861 | 0.024838182 | 0.04266437 | 520 | 520 |
| KLRB1    | -0.098440298 | 0.024778612 | 0.0425693  | 520 | 516 |
| PPIL2    | -0.098446301 | 0.024769778 | 0.04255775 | 520 | 520 |
| RPH3AL   | -0.098468903 | 0.024736546 | 0.04250428 | 520 | 520 |
| SLC22A23 | -0.09850244  | 0.024687307 | 0.04242329 | 520 | 520 |
| C11orf51 | -0.098516426 | 0.024666797 | 0.04239527 | 520 | 520 |
| C19orf2  | -0.098520249 | 0.024661194 | 0.04238925 | 520 | 520 |
| CCL25    | -0.098562016 | 0.024600045 | 0.04228775 | 520 | 324 |
| DNAJC5G  | -0.09856303  | 0.024598562 | 0.04228775 | 520 | 97  |
| PARP9    | -0.098593812 | 0.024553582 | 0.04221868 | 520 | 520 |
| PHF10    | -0.098621134 | 0.024513718 | 0.04216092 | 520 | 520 |
| ENKUR    | -0.098705193 | 0.024391422 | 0.04196132 | 520 | 512 |
| AKT1S1   | -0.098706838 | 0.024389033 | 0.04196079 | 520 | 520 |
| KCTD3    | -0.098734902 | 0.024348324 | 0.04189433 | 520 | 520 |
| RRP9     | -0.098748078 | 0.024329231 | 0.04186505 | 520 | 520 |
| L3MBTL4  | -0.098753724 | 0.024321054 | 0.04185455 | 520 | 516 |
| C18orf16 | -0.098817761 | 0.024228474 | 0.04170234 | 520 | 164 |
| LCE1B    | -0.098873334 | 0.024148376 | 0.04156803 | 520 | 417 |
| GPR113   | -0.098957394 | 0.024027656 | 0.04136375 | 520 | 518 |
| ORC2L    | -0.099015866 | 0.02394399  | 0.0412479  | 520 | 520 |
| SFRS12   | -0.099016427 | 0.02394319  | 0.0412479  | 520 | 520 |
| ZAR1     | -0.099111044 | 0.023808343 | 0.04102473 | 520 | 195 |

|           |              |             |            |     |     |
|-----------|--------------|-------------|------------|-----|-----|
| ANKLE1    | -0.099162781 | 0.023734887 | 0.04090515 | 520 | 518 |
| GINS4     | -0.099166694 | 0.023729339 | 0.04090258 | 520 | 520 |
| POLR1E    | -0.099172181 | 0.023721562 | 0.04089617 | 520 | 520 |
| NHSL1     | -0.099177415 | 0.023714146 | 0.04088688 | 520 | 520 |
| KLK9      | -0.099182641 | 0.023706742 | 0.04087761 | 520 | 510 |
| DAND5     | -0.099222533 | 0.023650296 | 0.04078377 | 520 | 443 |
| ABHD14B   | -0.099237292 | 0.023629442 | 0.04075129 | 520 | 520 |
| TBL1Y     | -0.099269611 | 0.02358383  | 0.04067611 | 520 | 252 |
| SH3GL1    | -0.099293555 | 0.023550089 | 0.04062834 | 520 | 520 |
| ZNF879    | -0.099329016 | 0.023500192 | 0.04054919 | 520 | 518 |
| TH1L      | -0.099362745 | 0.023452819 | 0.04047784 | 520 | 520 |
| KRTAP17-1 | -0.099369333 | 0.023443575 | 0.04046535 | 520 | 124 |
| RTBDN     | -0.099430972 | 0.023357245 | 0.04033015 | 520 | 457 |
| SEPHS2    | -0.099445673 | 0.023336695 | 0.04030502 | 520 | 520 |
| ANKRD49   | -0.099450671 | 0.023329713 | 0.04029641 | 520 | 520 |
| HIST1H4B  | -0.099534597 | 0.023212728 | 0.04010466 | 520 | 304 |
| SLC22A13  | -0.099541316 | 0.023203385 | 0.04009882 | 520 | 373 |
| RCL1      | -0.099591812 | 0.023133268 | 0.03998108 | 520 | 520 |
| NPL       | -0.099600074 | 0.023121813 | 0.0399647  | 520 | 520 |
| NHEDC1    | -0.099626158 | 0.02308568  | 0.03990567 | 520 | 507 |
| ENHO      | -0.099646267 | 0.023057859 | 0.039861   | 520 | 488 |
| SLC10A6   | -0.099697998 | 0.02298642  | 0.03974772 | 520 | 518 |
| TMEM174   | -0.099747289 | 0.022918528 | 0.03963712 | 520 | 33  |
| DNAH9     | -0.099756327 | 0.022906099 | 0.03961902 | 520 | 507 |
| LOC643677 | -0.099763679 | 0.022895993 | 0.03960494 | 520 | 471 |
| FCRL2     | -0.099767523 | 0.022890711 | 0.0395992  | 520 | 423 |
| ARGFX     | -0.099772448 | 0.022883943 | 0.03959128 | 520 | 154 |
| TSG101    | -0.099809346 | 0.022833302 | 0.03951345 | 520 | 520 |
| KRTAP4-7  | -0.099816212 | 0.022823888 | 0.03950055 | 520 | 51  |
| COPS6     | -0.099824297 | 0.02281281  | 0.03948476 | 520 | 520 |
| POLR3F    | -0.099889992 | 0.022722955 | 0.03934255 | 520 | 520 |
| MTCP1NB   | -0.099978207 | 0.022602781 | 0.03915149 | 520 | 520 |
| MX1       | -0.100006527 | 0.022564319 | 0.03908822 | 520 | 520 |
| KIR3DL3   | -0.100020333 | 0.022545588 | 0.03905913 | 520 | 166 |
| OR10A7    | -0.100024757 | 0.022539589 | 0.03905209 | 520 | 6   |
| BREA2     | -0.100026674 | 0.02253699  | 0.03905095 | 520 | 503 |
| H1FNT     | -0.10006817  | 0.022480793 | 0.03896362 | 520 | 251 |
| AMBP      | -0.100087313 | 0.022454911 | 0.03892545 | 520 | 353 |
| TBL1X     | -0.100183643 | 0.022325053 | 0.038707   | 520 | 520 |
| CCDC138   | -0.100221323 | 0.022274436 | 0.03862588 | 520 | 520 |
| HARS2     | -0.100289939 | 0.022182516 | 0.03848303 | 520 | 520 |
| LOC647946 | -0.100335465 | 0.02212171  | 0.03838745 | 520 | 490 |
| HPGD      | -0.100339995 | 0.022115667 | 0.03838027 | 520 | 520 |
| FABP6     | -0.100355979 | 0.022094358 | 0.03834659 | 520 | 511 |
| ARHGEF3   | -0.100406937 | 0.022026541 | 0.03823876 | 520 | 520 |
| FAM170A   | -0.100421835 | 0.022006749 | 0.03820769 | 520 | 169 |

|            |              |             |            |     |     |
|------------|--------------|-------------|------------|-----|-----|
| ALG3       | -0.100428597 | 0.02199777  | 0.03819539 | 520 | 520 |
| ABTB1      | -0.100487213 | 0.021920074 | 0.03806704 | 520 | 520 |
| SOX14      | -0.100489972 | 0.021916422 | 0.03806406 | 520 | 83  |
| DDX54      | -0.100517662 | 0.021879807 | 0.03800693 | 520 | 520 |
| TP53TG1    | -0.100562348 | 0.021820829 | 0.03791101 | 520 | 520 |
| HSPB9      | -0.100599488 | 0.021771915 | 0.03783255 | 520 | 469 |
| PRMT5      | -0.100610694 | 0.021757175 | 0.03781019 | 520 | 520 |
| GOLGA7     | -0.100639248 | 0.021719657 | 0.03774825 | 520 | 520 |
| OOEP       | -0.100672228 | 0.021676392 | 0.0376828  | 520 | 335 |
| C12orf76   | -0.100699773 | 0.021640315 | 0.03762332 | 520 | 520 |
| TNFRSF17   | -0.100706478 | 0.02163154  | 0.03761131 | 520 | 486 |
| C14orf93   | -0.100722202 | 0.021610977 | 0.0375788  | 520 | 520 |
| UTP18      | -0.100830248 | 0.02147013  | 0.03734677 | 520 | 520 |
| MGC2889    | -0.100836216 | 0.021462374 | 0.03733649 | 520 | 388 |
| ITGA2B     | -0.100836345 | 0.021462206 | 0.03733649 | 520 | 519 |
| OTUD3      | -0.100887651 | 0.021395626 | 0.03723001 | 520 | 520 |
| SLC22A7    | -0.10094894  | 0.021316326 | 0.03710163 | 520 | 67  |
| RXFP4      | -0.100999568 | 0.021251012 | 0.03699434 | 520 | 253 |
| NCRNA00173 | -0.101039191 | 0.021200017 | 0.03691831 | 520 | 496 |
| PNOC       | -0.101101656 | 0.02111984  | 0.03678822 | 520 | 495 |
| BLMH       | -0.101114494 | 0.021103394 | 0.03676593 | 520 | 520 |
| DUSP8      | -0.101268677 | 0.020906752 | 0.03643908 | 520 | 520 |
| CCNI2      | -0.101281076 | 0.020891009 | 0.03641479 | 520 | 513 |
| SPATA19    | -0.101366919 | 0.020782288 | 0.03623468 | 520 | 325 |
| tAKR       | -0.101409509 | 0.020728531 | 0.03614408 | 520 | 120 |
| PIK3CB     | -0.101409912 | 0.020728023 | 0.03614408 | 520 | 520 |
| CHFR       | -0.101415378 | 0.020721133 | 0.03613743 | 520 | 520 |
| HIST1H3I   | -0.101467666 | 0.020655321 | 0.03602577 | 520 | 348 |
| SERINC4    | -0.101489302 | 0.020628142 | 0.03598459 | 520 | 475 |
| BST2       | -0.101562888 | 0.020535936 | 0.03583614 | 520 | 520 |
| NEURL3     | -0.101567159 | 0.020530595 | 0.03582992 | 520 | 518 |
| OR10H2     | -0.10165515  | 0.020420835 | 0.03564454 | 520 | 120 |
| SERPINB12  | -0.101664469 | 0.02040924  | 0.03562738 | 520 | 452 |
| SALL3      | -0.101714918 | 0.020346572 | 0.03553337 | 520 | 262 |
| SOAT2      | -0.101732897 | 0.020324279 | 0.03549751 | 520 | 458 |
| PFKFB2     | -0.101749831 | 0.0203033   | 0.03546394 | 520 | 520 |
| UBE2V2     | -0.10177157  | 0.020276398 | 0.03542002 | 520 | 520 |
| KIF15      | -0.101796654 | 0.020245394 | 0.03536892 | 520 | 520 |
| TAF1C      | -0.101801337 | 0.020239609 | 0.03536188 | 520 | 520 |
| FLRT1      | -0.101811217 | 0.020227412 | 0.03534363 | 520 | 510 |
| DUSP12     | -0.10182644  | 0.020208631 | 0.03531388 | 520 | 520 |
| MYO6       | -0.101870069 | 0.020154888 | 0.03522302 | 520 | 520 |
| TMEM117    | -0.101935018 | 0.020075114 | 0.03508664 | 520 | 520 |
| C22orf45   | -0.101948636 | 0.020058422 | 0.03506051 | 520 | 437 |
| TACC2      | -0.101987274 | 0.02001113  | 0.03498088 | 520 | 520 |
| SFT2D3     | -0.101988737 | 0.020009341 | 0.03498078 | 520 | 520 |

|            |              |             |            |     |     |
|------------|--------------|-------------|------------|-----|-----|
| INTS7      | -0.10203515  | 0.019952664 | 0.03488775 | 520 | 520 |
| TTC16      | -0.102086725 | 0.019889847 | 0.03478696 | 520 | 456 |
| TMUB1      | -0.102151689 | 0.019810968 | 0.03465802 | 520 | 520 |
| NXT1       | -0.102179901 | 0.019776799 | 0.03460125 | 520 | 520 |
| HP1BP3     | -0.102244888 | 0.019698283 | 0.03448183 | 520 | 520 |
| SPNS3      | -0.102275756 | 0.019661084 | 0.03442269 | 520 | 513 |
| RBP3       | -0.10227599  | 0.019660802 | 0.03442269 | 520 | 254 |
| SAMM50     | -0.102352221 | 0.0195692   | 0.0342767  | 520 | 520 |
| ATP6V1E1   | -0.102399546 | 0.01951252  | 0.03418633 | 520 | 520 |
| PMS1       | -0.102410059 | 0.019499948 | 0.03417024 | 520 | 520 |
| C17orf59   | -0.102412646 | 0.019496855 | 0.03416779 | 520 | 520 |
| LCE5A      | -0.102418504 | 0.019489854 | 0.03416441 | 520 | 345 |
| NCRNA00111 | -0.102441942 | 0.019461864 | 0.03411833 | 520 | 61  |
| TTC39C     | -0.102456122 | 0.019444947 | 0.0340946  | 520 | 520 |
| ADH1A      | -0.102541099 | 0.019343837 | 0.03393207 | 520 | 189 |
| KRT9       | -0.102548063 | 0.019335571 | 0.03392052 | 520 | 518 |
| THAP11     | -0.102551599 | 0.019331374 | 0.03391611 | 520 | 520 |
| UBE2G2     | -0.102561367 | 0.019319787 | 0.03389873 | 520 | 520 |
| TBC1D3G    | -0.102597994 | 0.019276395 | 0.03382554 | 520 | 311 |
| TMEM61     | -0.102607471 | 0.019265182 | 0.0338088  | 520 | 510 |
| NEUROD6    | -0.102675017 | 0.019185422 | 0.03368055 | 520 | 17  |
| CCDC87     | -0.102706397 | 0.019148466 | 0.03362153 | 520 | 518 |
| MDM2       | -0.102749896 | 0.01909734  | 0.03354345 | 520 | 520 |
| FGF8       | -0.102833766 | 0.018999101 | 0.03338543 | 520 | 301 |
| SEMA4B     | -0.102862785 | 0.018965213 | 0.03332879 | 520 | 520 |
| ZNF547     | -0.102879878 | 0.018945276 | 0.03330246 | 520 | 519 |
| ZXDC       | -0.10292033  | 0.018898168 | 0.03322545 | 520 | 520 |
| LOC253039  | -0.102929325 | 0.018887706 | 0.03320995 | 520 | 520 |
| SLC5A5     | -0.102934586 | 0.01888159  | 0.03320209 | 520 | 472 |
| MASP1      | -0.102945833 | 0.018868521 | 0.033182   | 520 | 518 |
| BAP1       | -0.102955985 | 0.018856731 | 0.03316416 | 520 | 520 |
| KRT76      | -0.102969309 | 0.018841266 | 0.03313985 | 520 | 315 |
| TMEM62     | -0.102996423 | 0.018809831 | 0.03308745 | 520 | 520 |
| SLC15A2    | -0.103027134 | 0.01877428  | 0.03303068 | 520 | 520 |
| OR6X1      | -0.103028077 | 0.018773189 | 0.03303068 | 520 | 9   |
| UCN3       | -0.103033822 | 0.018766546 | 0.03302283 | 520 | 73  |
| DEFB105A   | -0.103042598 | 0.018756402 | 0.03301081 | 520 | 3   |
| RETNLB     | -0.103068427 | 0.018726572 | 0.03296688 | 520 | 160 |
| CXADR      | -0.103096784 | 0.018693872 | 0.03291506 | 520 | 520 |
| CCT4       | -0.103135106 | 0.018649758 | 0.03284312 | 520 | 520 |
| RAB4A      | -0.103230391 | 0.018540467 | 0.03266206 | 520 | 520 |
| ASF1A      | -0.10323941  | 0.018530151 | 0.03264674 | 520 | 520 |
| C15orf23   | -0.103258798 | 0.018507993 | 0.0326134  | 520 | 520 |
| NRG4       | -0.10334837  | 0.018405921 | 0.03243921 | 520 | 501 |
| C7orf34    | -0.103350468 | 0.018403535 | 0.03243784 | 520 | 114 |
| AKR1B15    | -0.10346518  | 0.018273547 | 0.03222563 | 520 | 513 |

|              |              |             |            |     |     |
|--------------|--------------|-------------|------------|-----|-----|
| FOXRED2      | -0.103502101 | 0.01823188  | 0.03215777 | 520 | 520 |
| CHMP6        | -0.103554698 | 0.018172666 | 0.03205894 | 520 | 520 |
| LIPJ         | -0.103635917 | 0.018081558 | 0.03191217 | 520 | 198 |
| SYCN         | -0.103647358 | 0.018068755 | 0.03189516 | 520 | 81  |
| SMG5         | -0.103656647 | 0.018058368 | 0.03187961 | 520 | 520 |
| ZNF414       | -0.103666288 | 0.018047592 | 0.03186338 | 520 | 520 |
| DSP          | -0.103732959 | 0.017973224 | 0.03174042 | 520 | 520 |
| TP53INP2     | -0.103741417 | 0.017963808 | 0.03172717 | 520 | 520 |
| HEMK1        | -0.103746552 | 0.017958094 | 0.03172203 | 520 | 520 |
| WDR12        | -0.103754316 | 0.017949458 | 0.03170956 | 520 | 520 |
| KPNA2        | -0.103758254 | 0.017945078 | 0.0317046  | 520 | 520 |
| RLN1         | -0.103792685 | 0.017906829 | 0.03164534 | 520 | 323 |
| OR4E2        | -0.103799939 | 0.017898781 | 0.03163389 | 520 | 17  |
| TIGD1        | -0.103803644 | 0.01789467  | 0.03162939 | 520 | 520 |
| LOC100132215 | -0.103852038 | 0.017841063 | 0.0315457  | 520 | 518 |
| SCAND1       | -0.103888459 | 0.017800811 | 0.03148281 | 520 | 520 |
| CLDND1       | -0.103933737 | 0.01775088  | 0.03140552 | 520 | 520 |
| SAFB2        | -0.103957376 | 0.017724861 | 0.03136224 | 520 | 520 |
| SPC24        | -0.103968995 | 0.017712084 | 0.03134238 | 520 | 520 |
| OR1I1        | -0.103976643 | 0.017703678 | 0.03133026 | 520 | 25  |
| TMEM120A     | -0.103979592 | 0.017700438 | 0.03132727 | 520 | 520 |
| BRMS1        | -0.103985817 | 0.0176936   | 0.03131792 | 520 | 520 |
| CR2          | -0.103992923 | 0.017685797 | 0.03130686 | 520 | 445 |
| CAPN8        | -0.104006907 | 0.017670451 | 0.03128519 | 520 | 398 |
| KRT6A        | -0.10401338  | 0.017663351 | 0.03127536 | 520 | 520 |
| IQCF1        | -0.104031576 | 0.017643406 | 0.03124553 | 520 | 153 |
| ANXA11       | -0.10404716  | 0.01762634  | 0.03121805 | 520 | 520 |
| GOLGA1       | -0.104053873 | 0.017618993 | 0.03120778 | 520 | 520 |
| HIST1H3C     | -0.104099453 | 0.017569179 | 0.03112228 | 520 | 472 |
| LOC285074    | -0.104123564 | 0.017542878 | 0.03107842 | 520 | 520 |
| SHB          | -0.104164995 | 0.017497764 | 0.03100667 | 520 | 520 |
| OPLAH        | -0.10417534  | 0.017486516 | 0.03098946 | 520 | 520 |
| MAP6D1       | -0.104182033 | 0.017479242 | 0.03097929 | 520 | 520 |
| C11orf82     | -0.104245157 | 0.017410766 | 0.03086607 | 520 | 520 |
| METT5D1      | -0.104290363 | 0.017361871 | 0.03079022 | 520 | 520 |
| KATNB1       | -0.104297113 | 0.017354581 | 0.03078    | 520 | 520 |
| MUC5B        | -0.104298629 | 0.017352943 | 0.03078    | 520 | 499 |
| ARHGEF38     | -0.104310117 | 0.017340543 | 0.03076321 | 520 | 221 |
| CBY1         | -0.104366944 | 0.017279315 | 0.03066269 | 520 | 520 |
| ISL1         | -0.10439606  | 0.017248017 | 0.03060984 | 520 | 403 |
| C11orf10     | -0.10440645  | 0.017236861 | 0.03059274 | 520 | 520 |
| LCE1E        | -0.104436129 | 0.017205027 | 0.03054161 | 520 | 415 |
| IL1R2        | -0.104439367 | 0.017201557 | 0.03053814 | 520 | 520 |
| PITPNC1      | -0.104470046 | 0.017168712 | 0.03049057 | 520 | 520 |
| SPO11        | -0.1044808   | 0.01715721  | 0.03047283 | 520 | 24  |
| RNF113A      | -0.104505019 | 0.017131335 | 0.03042955 | 520 | 520 |

|           |              |             |            |     |     |
|-----------|--------------|-------------|------------|-----|-----|
| CASC1     | -0.104536158 | 0.017098115 | 0.03037483 | 520 | 462 |
| TSPAN10   | -0.10453621  | 0.01709806  | 0.03037483 | 520 | 520 |
| SF3A3     | -0.104550389 | 0.017082952 | 0.0303543  | 520 | 520 |
| KCTD5     | -0.104560272 | 0.017072428 | 0.03034095 | 520 | 520 |
| NEUROD1   | -0.104563443 | 0.017069054 | 0.03033763 | 520 | 89  |
| GPN3      | -0.104651676 | 0.016975372 | 0.03018176 | 520 | 520 |
| C2orf65   | -0.104678151 | 0.016947349 | 0.0301346  | 520 | 496 |
| NR1H4     | -0.10469861  | 0.016925723 | 0.03010411 | 520 | 163 |
| BRMS1L    | -0.104742823 | 0.016879068 | 0.03002907 | 520 | 520 |
| AADA4L4   | -0.104747768 | 0.016873857 | 0.03002245 | 520 | 36  |
| SAR1B     | -0.104765205 | 0.016855494 | 0.02999243 | 520 | 520 |
| STARD7    | -0.104773568 | 0.016846692 | 0.02997941 | 520 | 520 |
| C13orf34  | -0.104793976 | 0.01682523  | 0.02994386 | 520 | 520 |
| FER1L4    | -0.104817277 | 0.016800757 | 0.02990294 | 520 | 519 |
| ANXA7     | -0.104823036 | 0.016794713 | 0.02989483 | 520 | 520 |
| GPS2      | -0.10482767  | 0.016789851 | 0.02989118 | 520 | 520 |
| EPHX1     | -0.104917813 | 0.016695518 | 0.02972876 | 520 | 520 |
| KHDRBS1   | -0.10493172  | 0.016681006 | 0.02970554 | 520 | 520 |
| DPP10     | -0.104933647 | 0.016678996 | 0.02970458 | 520 | 194 |
| ADAM11    | -0.104952553 | 0.016659287 | 0.02967497 | 520 | 518 |
| C6orf222  | -0.105006286 | 0.016603384 | 0.02958821 | 520 | 349 |
| ATG7      | -0.105011549 | 0.016597917 | 0.02958109 | 520 | 520 |
| SLC6A10P  | -0.105026331 | 0.016582571 | 0.02956157 | 520 | 520 |
| ACSS1     | -0.105069419 | 0.016537911 | 0.02948457 | 520 | 520 |
| C8orf44   | -0.105069749 | 0.016537569 | 0.02948457 | 520 | 520 |
| PRMT7     | -0.105088939 | 0.016517713 | 0.02945376 | 520 | 520 |
| SCGB3A1   | -0.105112744 | 0.016493111 | 0.0294151  | 520 | 463 |
| CNOT6     | -0.105131687 | 0.016473556 | 0.02938542 | 520 | 520 |
| OR2B2     | -0.105133232 | 0.016471963 | 0.02938518 | 520 | 69  |
| SEMG1     | -0.105150517 | 0.016454139 | 0.02935598 | 520 | 157 |
| CBX4      | -0.105168748 | 0.016435358 | 0.02932507 | 520 | 520 |
| ANKRD13A  | -0.105183931 | 0.016419732 | 0.02930237 | 520 | 520 |
| ZBBX      | -0.105199917 | 0.016403292 | 0.02927777 | 520 | 169 |
| GZMH      | -0.10522086  | 0.016381778 | 0.0292424  | 520 | 515 |
| PHAX      | -0.105250985 | 0.016350874 | 0.02918982 | 520 | 520 |
| C1orf230  | -0.105299866 | 0.016300837 | 0.02910565 | 520 | 182 |
| UTP15     | -0.105354874 | 0.01624469  | 0.02900796 | 520 | 520 |
| NOS1AP    | -0.105361269 | 0.016238174 | 0.0289989  | 520 | 519 |
| DNMT3L    | -0.105396618 | 0.016202195 | 0.02894233 | 520 | 136 |
| RNF144B   | -0.105428336 | 0.016169971 | 0.02889245 | 520 | 520 |
| OSGEPL1   | -0.105487459 | 0.016110055 | 0.02879049 | 520 | 520 |
| C1orf168  | -0.105501507 | 0.016095846 | 0.02876765 | 520 | 342 |
| C20orf135 | -0.105505806 | 0.016091501 | 0.02876243 | 520 | 520 |
| DCLRE1A   | -0.105527361 | 0.016069728 | 0.02872861 | 520 | 520 |
| PROM2     | -0.105530927 | 0.016066127 | 0.02872472 | 520 | 520 |
| LOC400657 | -0.105541607 | 0.01605535  | 0.028708   | 520 | 520 |

|           |              |             |            |     |     |
|-----------|--------------|-------------|------------|-----|-----|
| MSL2      | -0.105569781 | 0.016026952 | 0.02865976 | 520 | 520 |
| ACADSB    | -0.10559137  | 0.016005221 | 0.02862344 | 520 | 520 |
| SRPRB     | -0.10563032  | 0.015966079 | 0.02855597 | 520 | 520 |
| LHX9      | -0.105676971 | 0.015919309 | 0.0284799  | 520 | 411 |
| C3orf51   | -0.105741523 | 0.015854792 | 0.02836951 | 520 | 62  |
| DAK       | -0.105757915 | 0.015838445 | 0.02834278 | 520 | 520 |
| TFF1      | -0.105776666 | 0.015819763 | 0.02831186 | 520 | 260 |
| FLJ37453  | -0.105781275 | 0.015815174 | 0.02830616 | 520 | 520 |
| ABCD3     | -0.10590416  | 0.015693255 | 0.02809792 | 520 | 520 |
| DDX41     | -0.105951804 | 0.015646208 | 0.02801617 | 520 | 520 |
| C7orf64   | -0.105960167 | 0.015637961 | 0.02800389 | 520 | 520 |
| ANKRD32   | -0.105980907 | 0.01561753  | 0.02796979 | 520 | 520 |
| CEACAM8   | -0.106000757 | 0.015597996 | 0.02793729 | 520 | 157 |
| PPIG      | -0.106043908 | 0.015555607 | 0.02786384 | 520 | 520 |
| DFFA      | -0.106069923 | 0.015530101 | 0.02782062 | 520 | 520 |
| PSENFEN   | -0.106099474 | 0.015501171 | 0.02777373 | 520 | 520 |
| C1orf182  | -0.10610752  | 0.015493303 | 0.0277621  | 520 | 508 |
| GK        | -0.106119848 | 0.015481254 | 0.02774544 | 520 | 520 |
| SULT1B1   | -0.106123987 | 0.015477211 | 0.02774066 | 520 | 448 |
| RANBP3    | -0.106159048 | 0.015442995 | 0.02768426 | 520 | 520 |
| MDM4      | -0.106161775 | 0.015440336 | 0.02768195 | 520 | 520 |
| PIP       | -0.106178247 | 0.015424287 | 0.02765659 | 520 | 236 |
| MAP3K5    | -0.106187707 | 0.015415077 | 0.0276465  | 520 | 520 |
| CDC34     | -0.106229881 | 0.015374073 | 0.02757787 | 520 | 520 |
| HMGB1     | -0.106255299 | 0.015349407 | 0.02753607 | 520 | 520 |
| CNIH4     | -0.106294613 | 0.015311323 | 0.0274702  | 520 | 520 |
| POLR2G    | -0.106314231 | 0.015292351 | 0.0274386  | 520 | 520 |
| H2AFB1    | -0.106320349 | 0.015286439 | 0.02743043 | 520 | 446 |
| C10orf50  | -0.106370738 | 0.015237818 | 0.02734562 | 520 | 188 |
| LOC653113 | -0.106379939 | 0.015228955 | 0.02733458 | 520 | 520 |
| ILF2      | -0.106388274 | 0.015220929 | 0.027327   | 520 | 520 |
| CTRC      | -0.106445695 | 0.015165743 | 0.02723324 | 520 | 311 |
| C21orf99  | -0.106447667 | 0.015163851 | 0.02723227 | 520 | 65  |
| RIOK3     | -0.106478902 | 0.015133909 | 0.02718576 | 520 | 520 |
| SNX22     | -0.106497471 | 0.015116133 | 0.02716109 | 520 | 520 |
| PER2      | -0.106555335 | 0.015060858 | 0.027069   | 520 | 520 |
| RHBDD3    | -0.106589216 | 0.015028575 | 0.02701339 | 520 | 520 |
| TMC8      | -0.106602739 | 0.015015707 | 0.02699266 | 520 | 520 |
| BSND      | -0.106651437 | 0.014969448 | 0.02691911 | 520 | 252 |
| KRT38     | -0.106704629 | 0.014919063 | 0.02683089 | 520 | 233 |
| ATP8B1    | -0.106716978 | 0.014907387 | 0.02681229 | 520 | 520 |
| DRAP1     | -0.106924186 | 0.014712666 | 0.02648569 | 520 | 520 |
| IL25      | -0.106938555 | 0.014699245 | 0.02646389 | 520 | 194 |
| PRDM12    | -0.106940433 | 0.014697492 | 0.0264631  | 520 | 440 |
| DNLZ      | -0.107007772 | 0.014634751 | 0.02636661 | 520 | 520 |
| CTAGE5    | -0.107008475 | 0.014634097 | 0.02636661 | 520 | 520 |



|           |              |             |            |     |     |
|-----------|--------------|-------------|------------|-----|-----|
| NFRKB     | -0.107031264 | 0.014612919 | 0.02633198 | 520 | 520 |
| ING4      | -0.107034579 | 0.01460984  | 0.02632879 | 520 | 520 |
| HN1L      | -0.107048183 | 0.014597212 | 0.02631073 | 520 | 520 |
| C17orf66  | -0.107054644 | 0.014591218 | 0.02630228 | 520 | 272 |
| LOC283999 | -0.107056667 | 0.014589342 | 0.02630125 | 520 | 199 |
| RPL3      | -0.107076469 | 0.014570987 | 0.02627051 | 520 | 520 |
| EDDM3B    | -0.107101825 | 0.014547514 | 0.02623288 | 520 | 17  |
| SS18L1    | -0.107189837 | 0.014466295 | 0.02609576 | 520 | 520 |
| LCN10     | -0.107220331 | 0.014438247 | 0.02604982 | 520 | 497 |
| RNF10     | -0.107244909 | 0.014415676 | 0.02601143 | 520 | 520 |
| AHCY      | -0.107281545 | 0.014382088 | 0.02595314 | 520 | 520 |
| TCP1      | -0.10728278  | 0.014380958 | 0.02595314 | 520 | 520 |
| C14orf34  | -0.107283551 | 0.014380251 | 0.02595314 | 520 | 514 |
| FAM153B   | -0.107283916 | 0.014379918 | 0.02595314 | 520 | 289 |
| RUFY1     | -0.10731185  | 0.014354358 | 0.0259147  | 520 | 520 |
| LOC400794 | -0.107386503 | 0.014286245 | 0.02580097 | 520 | 98  |
| GABRP     | -0.107405085 | 0.014269336 | 0.02577497 | 520 | 510 |
| ASAP1IT1  | -0.107444152 | 0.014233843 | 0.02571555 | 520 | 59  |
| TRIM17    | -0.107444767 | 0.014233285 | 0.02571555 | 520 | 501 |
| ZNF169    | -0.107469117 | 0.014211202 | 0.02567924 | 520 | 520 |
| SLC27A2   | -0.107482061 | 0.014199476 | 0.02566495 | 520 | 518 |
| HHLA2     | -0.10748451  | 0.014197258 | 0.02566325 | 520 | 409 |
| PPDPF     | -0.107499641 | 0.014183563 | 0.02564079 | 520 | 520 |
| TMEM147   | -0.107528013 | 0.014157915 | 0.02559672 | 520 | 520 |
| MCM6      | -0.107583334 | 0.014108023 | 0.0255088  | 520 | 520 |
| PPIAL4C   | -0.107641875 | 0.014055395 | 0.02542048 | 520 | 520 |
| PRSS12    | -0.107672228 | 0.014028176 | 0.02537353 | 520 | 520 |
| KRT6C     | -0.107672781 | 0.01402768  | 0.02537353 | 520 | 520 |
| DHX32     | -0.107859368 | 0.013861381 | 0.02508534 | 520 | 520 |
| BTNL9     | -0.107871279 | 0.013850824 | 0.02507074 | 520 | 514 |
| NCKIPSD   | -0.107926247 | 0.013802197 | 0.02498945 | 520 | 520 |
| IER5      | -0.107938988 | 0.013790948 | 0.02497581 | 520 | 520 |
| CRYGD     | -0.107950097 | 0.013781146 | 0.02496478 | 520 | 25  |
| ILF3      | -0.107989388 | 0.013746526 | 0.02490655 | 520 | 520 |
| CYP2A13   | -0.10800015  | 0.013737058 | 0.02489163 | 520 | 111 |
| DYDC1     | -0.108006694 | 0.013731302 | 0.02488344 | 520 | 138 |
| MCPH1     | -0.108019478 | 0.013720066 | 0.02486531 | 520 | 520 |
| TMEM27    | -0.108105149 | 0.013644973 | 0.02473366 | 520 | 520 |
| ANAPC13   | -0.108111739 | 0.013639212 | 0.02472544 | 520 | 520 |
| CLP1      | -0.108113589 | 0.013637596 | 0.02472473 | 520 | 520 |
| AK1       | -0.10812458  | 0.013627993 | 0.02470954 | 520 | 520 |
| EIF4EBP1  | -0.108138419 | 0.01361591  | 0.02468986 | 520 | 520 |
| ZNF557    | -0.108141242 | 0.013613446 | 0.02468761 | 520 | 520 |
| SSR4      | -0.108166032 | 0.013591829 | 0.02465284 | 520 | 520 |
| PARS2     | -0.108174567 | 0.013584393 | 0.02464379 | 520 | 520 |
| FDX1L     | -0.10817838  | 0.013581073 | 0.02463998 | 520 | 520 |

|           |              |             |            |     |     |
|-----------|--------------|-------------|------------|-----|-----|
| DDX23     | -0.108187898 | 0.013572787 | 0.02462938 | 520 | 520 |
| KIAA0020  | -0.108219997 | 0.013544876 | 0.02458316 | 520 | 520 |
| BAK1      | -0.108235218 | 0.013531658 | 0.02456138 | 520 | 520 |
| ACBD4     | -0.108297346 | 0.013477826 | 0.02447248 | 520 | 520 |
| HIST1H2BG | -0.108325777 | 0.013453254 | 0.02443006 | 520 | 519 |
| KRTAP10-6 | -0.108348832 | 0.013433357 | 0.02439942 | 520 | 33  |
| PLD6      | -0.108349832 | 0.013432495 | 0.02439942 | 520 | 520 |
| EPS15L1   | -0.10837646  | 0.013409549 | 0.02436386 | 520 | 520 |
| SPDYE6    | -0.108453191 | 0.013343619 | 0.02425063 | 520 | 520 |
| ANKK1     | -0.10846598  | 0.013332658 | 0.02423508 | 520 | 518 |
| NECAB3    | -0.108487664 | 0.013314092 | 0.02420569 | 520 | 520 |
| C4orf34   | -0.10851366  | 0.013291864 | 0.02416746 | 520 | 520 |
| BMP3      | -0.108523801 | 0.013283202 | 0.02415389 | 520 | 410 |
| CHCHD7    | -0.108525806 | 0.013281489 | 0.02415295 | 520 | 520 |
| RAC3      | -0.108533005 | 0.013275344 | 0.02414396 | 520 | 520 |
| MED19     | -0.10853825  | 0.013270868 | 0.02413799 | 520 | 520 |
| PGK2      | -0.108554406 | 0.013257089 | 0.02411728 | 520 | 137 |
| ZNF837    | -0.108603021 | 0.013215704 | 0.0240485  | 520 | 519 |
| PPP1CA    | -0.108756691 | 0.013085635 | 0.02382257 | 520 | 520 |
| COQ6      | -0.108842053 | 0.013013871 | 0.02369834 | 520 | 520 |
| GGTLC2    | -0.10884268  | 0.013013346 | 0.02369834 | 520 | 520 |
| IL18      | -0.108862591 | 0.012996658 | 0.02367127 | 520 | 520 |
| ESCO1     | -0.108871406 | 0.012989275 | 0.02365996 | 520 | 520 |
| KIAA1967  | -0.108905523 | 0.012960739 | 0.02361225 | 520 | 520 |
| ST20      | -0.108943651 | 0.012928912 | 0.02355852 | 520 | 520 |
| HSPA4     | -0.109060275 | 0.01283199  | 0.02339037 | 520 | 520 |
| IRF5      | -0.109112246 | 0.012789005 | 0.02332256 | 520 | 520 |
| TSNAX     | -0.109118153 | 0.012784128 | 0.02331577 | 520 | 520 |
| CCS       | -0.109120657 | 0.012782061 | 0.02331411 | 520 | 520 |
| SPINK6    | -0.109140927 | 0.012765338 | 0.02328571 | 520 | 465 |
| MON1A     | -0.109151997 | 0.012756214 | 0.02327117 | 520 | 520 |
| KRTCAP2   | -0.109210095 | 0.012708421 | 0.02318608 | 520 | 520 |
| UCMA      | -0.109258209 | 0.012668961 | 0.02312665 | 520 | 25  |
| SH2D1B    | -0.109335181 | 0.012606058 | 0.02302016 | 520 | 506 |
| SDR42E1   | -0.109397803 | 0.012555086 | 0.02293269 | 520 | 520 |
| EXO1      | -0.109411627 | 0.012543858 | 0.02291487 | 520 | 520 |
| KIAA1407  | -0.109415017 | 0.012541106 | 0.02291192 | 520 | 520 |
| CCDC77    | -0.109462    | 0.01250302  | 0.02285269 | 520 | 520 |
| SUN5      | -0.109555306 | 0.012427687 | 0.02272736 | 520 | 5   |
| TTC19     | -0.109555599 | 0.012427451 | 0.02272736 | 520 | 520 |
| PPIL1     | -0.109568832 | 0.0124168   | 0.02271157 | 520 | 520 |
| TPPP      | -0.109713532 | 0.012300855 | 0.02251175 | 520 | 520 |
| LOC389493 | -0.109721329 | 0.012294634 | 0.0225024  | 520 | 370 |
| ELP2P     | -0.10973736  | 0.012281853 | 0.0224831  | 520 | 519 |
| SREBF2    | -0.109753351 | 0.012269117 | 0.02246182 | 520 | 520 |
| KRT18     | -0.109760692 | 0.012263273 | 0.02245316 | 520 | 520 |

|              |              |             |            |     |     |
|--------------|--------------|-------------|------------|-----|-----|
| TMEM37       | -0.1097797   | 0.012248155 | 0.02242955 | 520 | 520 |
| PRKCH        | -0.109795223 | 0.01223582  | 0.02241103 | 520 | 520 |
| PTCD1        | -0.109831857 | 0.012206755 | 0.02236186 | 520 | 520 |
| OR6P1        | -0.109853208 | 0.012189843 | 0.02233494 | 520 | 6   |
| HCRT         | -0.109887196 | 0.012162964 | 0.02228974 | 520 | 38  |
| C15orf44     | -0.109912445 | 0.01214303  | 0.02225725 | 520 | 520 |
| SYTL5        | -0.109916991 | 0.012139445 | 0.02225271 | 520 | 505 |
| GIGYF1       | -0.109935121 | 0.012125153 | 0.02222853 | 520 | 520 |
| ABCG5        | -0.109950195 | 0.012113281 | 0.0222108  | 520 | 387 |
| ECHDC1       | -0.109950754 | 0.012112841 | 0.0222108  | 520 | 520 |
| KHDC1L       | -0.109956861 | 0.012108034 | 0.02220522 | 520 | 513 |
| ZNF263       | -0.109991185 | 0.012081051 | 0.02215775 | 520 | 520 |
| CYB561       | -0.110010845 | 0.01206562  | 0.02213146 | 520 | 520 |
| SMN2         | -0.110022578 | 0.012056419 | 0.0221166  | 520 | 520 |
| HMG20B       | -0.110096672 | 0.011998457 | 0.02201828 | 520 | 520 |
| ZNF443       | -0.110189799 | 0.011925956 | 0.02188723 | 520 | 519 |
| NEIL3        | -0.110203696 | 0.01191517  | 0.02187141 | 520 | 520 |
| TUBA4A       | -0.110211948 | 0.01190877  | 0.02186166 | 520 | 520 |
| AEBP2        | -0.11022676  | 0.011897289 | 0.02184257 | 520 | 520 |
| C4BPA        | -0.110234131 | 0.011891579 | 0.02183407 | 520 | 284 |
| PCP4         | -0.110249827 | 0.011879429 | 0.02181375 | 520 | 207 |
| TERT         | -0.110249895 | 0.011879376 | 0.02181375 | 520 | 501 |
| AIM1         | -0.110259427 | 0.011872003 | 0.02180409 | 520 | 520 |
| UBLCP1       | -0.110291916 | 0.011846901 | 0.02176393 | 520 | 520 |
| SNORA26      | -0.110297527 | 0.011842572 | 0.02175994 | 520 | 17  |
| CHDH         | -0.110303451 | 0.011838001 | 0.02175353 | 520 | 516 |
| IRX3         | -0.110314082 | 0.011829803 | 0.02174243 | 520 | 520 |
| MBD3         | -0.110328111 | 0.011818992 | 0.02172454 | 520 | 520 |
| TPPP3        | -0.11036305  | 0.011792107 | 0.02168302 | 520 | 520 |
| ST7L         | -0.110402144 | 0.011762088 | 0.02163177 | 520 | 520 |
| ITPKA        | -0.110416407 | 0.011751153 | 0.0216156  | 520 | 520 |
| TNFRSF13B    | -0.110431702 | 0.011739437 | 0.02159602 | 520 | 453 |
| C22orf31     | -0.110432314 | 0.011738968 | 0.02159602 | 520 | 451 |
| LRCH4        | -0.110448516 | 0.011726569 | 0.02157826 | 520 | 520 |
| INTS3        | -0.110493543 | 0.01169217  | 0.02151692 | 520 | 520 |
| LRRC24       | -0.110495664 | 0.011690552 | 0.02151591 | 520 | 506 |
| TSN          | -0.110524675 | 0.011668439 | 0.02147913 | 520 | 520 |
| RSRC2        | -0.110532918 | 0.011662163 | 0.0214715  | 520 | 520 |
| LOC100130522 | -0.110537953 | 0.01165833  | 0.0214664  | 520 | 511 |
| C3orf34      | -0.110541419 | 0.011655693 | 0.02146383 | 520 | 520 |
| ARPC1A       | -0.110545528 | 0.011652567 | 0.02146167 | 520 | 520 |
| PTPRVP       | -0.11062138  | 0.011594994 | 0.02136344 | 520 | 356 |
| POR          | -0.110623474 | 0.011593409 | 0.02136247 | 520 | 520 |
| C6orf10      | -0.110635161 | 0.011584562 | 0.02134812 | 520 | 412 |
| L3MBTL       | -0.110672134 | 0.011556612 | 0.0213044  | 520 | 520 |
| ISCA2        | -0.110699983 | 0.0115356   | 0.02126761 | 520 | 520 |

|          |              |             |            |     |     |
|----------|--------------|-------------|------------|-----|-----|
| THAP10   | -0.110796737 | 0.011462859 | 0.02113737 | 520 | 520 |
| GJB1     | -0.110886038 | 0.011396083 | 0.02102192 | 520 | 358 |
| SLC5A1   | -0.110975871 | 0.011329256 | 0.02090438 | 520 | 518 |
| ACRV1    | -0.110978716 | 0.011327145 | 0.0209024  | 520 | 492 |
| ZNF513   | -0.110987117 | 0.011320914 | 0.02089473 | 520 | 520 |
| C20orf72 | -0.111022975 | 0.011294354 | 0.02084952 | 520 | 520 |
| OR7D4    | -0.111023973 | 0.011293615 | 0.02084952 | 520 | 30  |
| SLC5A8   | -0.111041586 | 0.01128059  | 0.02083174 | 520 | 184 |
| NYX      | -0.111042898 | 0.01127962  | 0.02083174 | 520 | 95  |
| CAPN1    | -0.111097056 | 0.011239656 | 0.02075995 | 520 | 520 |
| EFHA1    | -0.111101498 | 0.011236383 | 0.02075581 | 520 | 520 |
| EIF5AL1  | -0.111106785 | 0.011232489 | 0.02075052 | 520 | 520 |
| OR7G3    | -0.111111446 | 0.011229057 | 0.02074608 | 520 | 16  |
| PGAM5    | -0.111118916 | 0.01122356  | 0.02073972 | 520 | 520 |
| GGNBP2   | -0.111232424 | 0.011140311 | 0.02059344 | 520 | 520 |
| MTF2     | -0.111249078 | 0.011128144 | 0.02057283 | 520 | 520 |
| GPATCH4  | -0.11126297  | 0.011118002 | 0.02055597 | 520 | 520 |
| SOX2OT   | -0.111264339 | 0.011117003 | 0.02055597 | 520 | 508 |
| EIF3D    | -0.111290784 | 0.011097723 | 0.02052224 | 520 | 520 |
| AUH      | -0.111298993 | 0.011091744 | 0.02051306 | 520 | 520 |
| FLJ45340 | -0.11137096  | 0.011039449 | 0.02042009 | 520 | 520 |
| NUPL2    | -0.111409285 | 0.011011689 | 0.02037435 | 520 | 520 |
| GPR160   | -0.111429076 | 0.010997378 | 0.02034974 | 520 | 520 |
| C11orf9  | -0.111450891 | 0.010981623 | 0.02032245 | 520 | 520 |
| PSMD13   | -0.111456167 | 0.010977815 | 0.02031727 | 520 | 520 |
| ETHE1    | -0.111473333 | 0.010965435 | 0.02029808 | 520 | 520 |
| NKX2-6   | -0.111540999 | 0.010916756 | 0.02021168 | 520 | 63  |
| POLR2D   | -0.111574365 | 0.010892823 | 0.02016923 | 520 | 520 |
| PMS2L3   | -0.111592153 | 0.010880082 | 0.02014749 | 520 | 520 |
| OR2M7    | -0.111661397 | 0.010830614 | 0.02005957 | 520 | 18  |
| UNC119   | -0.111683944 | 0.010814549 | 0.02003165 | 520 | 520 |
| ABCA17P  | -0.111685145 | 0.010813694 | 0.02003165 | 520 | 443 |
| SFRS15   | -0.111716847 | 0.010791144 | 0.01999381 | 520 | 520 |
| SRRM5    | -0.111780335 | 0.010746109 | 0.01991586 | 520 | 520 |
| ALG13    | -0.111783426 | 0.010743921 | 0.01991363 | 520 | 520 |
| SOX13    | -0.111806543 | 0.010727567 | 0.01988515 | 520 | 520 |
| FAM153C  | -0.111855399 | 0.010693077 | 0.01982669 | 520 | 147 |
| APOBEC4  | -0.111911888 | 0.010653322 | 0.01975661 | 520 | 128 |
| OR3A4    | -0.111916418 | 0.01065014  | 0.01975252 | 520 | 16  |
| RNF151   | -0.111948826 | 0.010627397 | 0.01971215 | 520 | 187 |
| HCG27    | -0.111958624 | 0.01062053  | 0.01970123 | 520 | 510 |
| FLJ42393 | -0.111973433 | 0.010610158 | 0.0196838  | 520 | 317 |
| ATP6V0A4 | -0.111989116 | 0.010599184 | 0.01966706 | 520 | 501 |
| MGC72080 | -0.112023785 | 0.010574959 | 0.01962572 | 520 | 520 |
| GTF2H4   | -0.112069787 | 0.010542892 | 0.01956981 | 520 | 520 |
| KCNH4    | -0.1121579   | 0.01048171  | 0.01946162 | 520 | 468 |

|              |              |             |            |     |     |
|--------------|--------------|-------------|------------|-----|-----|
| AKR1C2       | -0.112173376 | 0.010470997 | 0.01944352 | 520 | 520 |
| PGBD5        | -0.112227576 | 0.010433554 | 0.01937578 | 520 | 520 |
| C20orf106    | -0.112244576 | 0.010421834 | 0.01935579 | 520 | 336 |
| DNAJB13      | -0.112262507 | 0.010409485 | 0.01933464 | 520 | 338 |
| ADM2         | -0.112286235 | 0.010393163 | 0.0193061  | 520 | 520 |
| SP9          | -0.112288297 | 0.010391746 | 0.01930525 | 520 | 409 |
| RAB27B       | -0.112369658 | 0.010335961 | 0.01920515 | 520 | 520 |
| PAIP2        | -0.112460496 | 0.010273992 | 0.01909353 | 520 | 520 |
| POLR2K       | -0.112482481 | 0.010259044 | 0.01906926 | 520 | 520 |
| TSTA3        | -0.112497873 | 0.01024859  | 0.01905159 | 520 | 520 |
| C12orf10     | -0.112502914 | 0.010245168 | 0.01904698 | 520 | 520 |
| LCE3C        | -0.112510284 | 0.010240167 | 0.01903951 | 520 | 208 |
| CREB3L4      | -0.112517436 | 0.010235317 | 0.01903393 | 520 | 520 |
| NOB1         | -0.112585349 | 0.010189357 | 0.01895371 | 520 | 520 |
| TPPP2        | -0.112632719 | 0.010157408 | 0.01889602 | 520 | 124 |
| ZNF695       | -0.112647863 | 0.010147213 | 0.0188788  | 520 | 505 |
| SLC16A14     | -0.112696206 | 0.010114728 | 0.01882183 | 520 | 520 |
| GTF3C2       | -0.112700601 | 0.010111178 | 0.01881808 | 520 | 520 |
| RFNG         | -0.11274765  | 0.010080262 | 0.01876636 | 520 | 520 |
| C16orf73     | -0.112786668 | 0.01005419  | 0.01871955 | 520 | 297 |
| NPM3         | -0.112792339 | 0.010050405 | 0.01871423 | 520 | 520 |
| ARL8B        | -0.112821936 | 0.010030675 | 0.01868094 | 520 | 520 |
| C11orf73     | -0.112874226 | 0.009995901 | 0.01862134 | 520 | 520 |
| HTATSF1      | -0.112884574 | 0.009989032 | 0.01861026 | 520 | 520 |
| B3GAT2       | -0.112894732 | 0.009982293 | 0.01859942 | 520 | 507 |
| NEUROG1      | -0.112897275 | 0.009980607 | 0.018598   | 520 | 143 |
| GGNBP1       | -0.112905308 | 0.009975282 | 0.0185898  | 520 | 112 |
| CHP2         | -0.112923721 | 0.009963085 | 0.01856878 | 520 | 488 |
| HERC6        | -0.112953421 | 0.009943439 | 0.01853388 | 520 | 520 |
| BCAS1        | -0.113017732 | 0.009901016 | 0.01845992 | 520 | 520 |
| MUC2         | -0.113064154 | 0.009870494 | 0.01840812 | 520 | 442 |
| ZNF473       | -0.113157109 | 0.009809628 | 0.018298   | 520 | 520 |
| PCNAP1       | -0.113158663 | 0.009808613 | 0.0182978  | 520 | 16  |
| C2orf3       | -0.113159771 | 0.009807889 | 0.0182978  | 520 | 520 |
| ABO          | -0.113229111 | 0.009762711 | 0.01821554 | 520 | 493 |
| SGOL1        | -0.113246461 | 0.009751435 | 0.01819618 | 520 | 520 |
| RBMXL2       | -0.113249225 | 0.00974964  | 0.01819452 | 520 | 153 |
| NOX1         | -0.113257662 | 0.009744162 | 0.01818598 | 520 | 380 |
| GPR87        | -0.113390815 | 0.00965807  | 0.01803531 | 520 | 520 |
| LOC100133957 | -0.113419175 | 0.009639821 | 0.0180029  | 520 | 514 |
| MDH1B        | -0.113485234 | 0.009597432 | 0.01792872 | 520 | 511 |
| PEX16        | -0.113554801 | 0.009552971 | 0.01785559 | 520 | 520 |
| GHRLOS       | -0.113568472 | 0.009544256 | 0.01784261 | 520 | 517 |
| ABCA13       | -0.113585393 | 0.009533478 | 0.01782411 | 520 | 518 |
| GSR          | -0.113596347 | 0.009526507 | 0.01781273 | 520 | 520 |
| NT5C1B       | -0.113679443 | 0.00947377  | 0.01771905 | 520 | 489 |

|           |              |             |            |     |     |
|-----------|--------------|-------------|------------|-----|-----|
| KIF18B    | -0.113812245 | 0.009390027 | 0.01756894 | 520 | 520 |
| SNORA10   | -0.113813274 | 0.00938938  | 0.01756894 | 520 | 129 |
| MESP1     | -0.113820186 | 0.00938504  | 0.01756287 | 520 | 504 |
| PTGR1     | -0.113888362 | 0.009342325 | 0.01748618 | 520 | 520 |
| TCF19     | -0.113897425 | 0.00933666  | 0.0174772  | 520 | 520 |
| RMND5A    | -0.113946946 | 0.009305759 | 0.01742259 | 520 | 520 |
| ZNF691    | -0.113978292 | 0.009286245 | 0.01738767 | 520 | 520 |
| DEAF1     | -0.114003324 | 0.00927069  | 0.01736016 | 520 | 520 |
| ANKRD57   | -0.1140263   | 0.009256431 | 0.01733507 | 520 | 520 |
| TPI1      | -0.114035249 | 0.009250883 | 0.01732629 | 520 | 520 |
| EGLN2     | -0.114049256 | 0.009242205 | 0.01731164 | 520 | 520 |
| MAMSTR    | -0.114067258 | 0.009231062 | 0.01729398 | 520 | 520 |
| SULT1A2   | -0.114081379 | 0.00922233  | 0.01728083 | 520 | 517 |
| ZAR1L     | -0.114107763 | 0.009206035 | 0.01725351 | 520 | 162 |
| CDKN2D    | -0.114208926 | 0.009143791 | 0.01714323 | 520 | 520 |
| MAZ       | -0.114223481 | 0.009134867 | 0.01712968 | 520 | 520 |
| BCL2L1    | -0.114232662 | 0.009129241 | 0.01712232 | 520 | 520 |
| STARD10   | -0.114298873 | 0.009088763 | 0.01704957 | 520 | 520 |
| LOC157627 | -0.114300402 | 0.00908783  | 0.01704941 | 520 | 89  |
| WDR38     | -0.114330117 | 0.009069717 | 0.01701701 | 520 | 403 |
| LYG1      | -0.11440737  | 0.009022779 | 0.0169341  | 520 | 503 |
| C19orf22  | -0.114408223 | 0.009022262 | 0.0169341  | 520 | 520 |
| CS        | -0.114413473 | 0.00901908  | 0.01693145 | 520 | 520 |
| UPK2      | -0.114421551 | 0.009014186 | 0.01692384 | 520 | 503 |
| CEACAM16  | -0.114434764 | 0.009006186 | 0.01691197 | 520 | 280 |
| MAPK10    | -0.114437487 | 0.009004539 | 0.01691045 | 520 | 519 |
| CCNA2     | -0.114510047 | 0.008960728 | 0.01683288 | 520 | 520 |
| SFRS18    | -0.11454901  | 0.008937281 | 0.01679196 | 520 | 520 |
| SRPK1     | -0.114555109 | 0.008933616 | 0.01678664 | 520 | 520 |
| HIST1H2AM | -0.11459569  | 0.008909262 | 0.01674556 | 520 | 517 |
| MBLAC1    | -0.114612419 | 0.008899239 | 0.01672828 | 520 | 520 |
| GDI2      | -0.114612604 | 0.008899128 | 0.01672828 | 520 | 520 |
| NCF1      | -0.114658621 | 0.008871612 | 0.0166814  | 520 | 520 |
| CA10      | -0.114729462 | 0.0088294   | 0.01660784 | 520 | 233 |
| EXOSC1    | -0.114735984 | 0.008825522 | 0.01660209 | 520 | 520 |
| SLC25A11  | -0.114778192 | 0.008800467 | 0.01655805 | 520 | 520 |
| KLHDC7B   | -0.114812314 | 0.008780257 | 0.01652157 | 520 | 520 |
| DRG2      | -0.114844047 | 0.0087615   | 0.01648935 | 520 | 520 |
| HSPBAP1   | -0.11484515  | 0.008760849 | 0.01648935 | 520 | 520 |
| HIST1H2BD | -0.114866381 | 0.00874832  | 0.01646762 | 520 | 520 |
| HMGN5     | -0.114868451 | 0.008747099 | 0.01646686 | 520 | 520 |
| NPEPL1    | -0.114874042 | 0.008743803 | 0.01646219 | 520 | 520 |
| HDHD2     | -0.114924264 | 0.008714243 | 0.01641113 | 520 | 520 |
| UQCC      | -0.114937355 | 0.008706553 | 0.01639971 | 520 | 520 |
| CEP72     | -0.114944001 | 0.00870265  | 0.01639543 | 520 | 520 |
| CNGA2     | -0.115060118 | 0.008634727 | 0.01627354 | 520 | 19  |

|           |              |             |            |     |     |
|-----------|--------------|-------------|------------|-----|-----|
| KRTDAP    | -0.115085349 | 0.008620031 | 0.01624736 | 520 | 515 |
| RNF114    | -0.115090968 | 0.008616761 | 0.01624272 | 520 | 520 |
| C9orf117  | -0.115092376 | 0.008615942 | 0.01624269 | 520 | 518 |
| ACOT7     | -0.115106086 | 0.008607969 | 0.01622918 | 520 | 520 |
| CXorf41   | -0.115144891 | 0.008585438 | 0.01618822 | 520 | 99  |
| CAGE1     | -0.115219422 | 0.00854231  | 0.0161084  | 520 | 510 |
| C1orf56   | -0.115295376 | 0.008498559 | 0.0160349  | 520 | 520 |
| HIST1H3F  | -0.115320212 | 0.008484296 | 0.01600948 | 520 | 465 |
| HINFP     | -0.115351354 | 0.008466442 | 0.01597729 | 520 | 520 |
| UBA6      | -0.115379292 | 0.008450453 | 0.01595159 | 520 | 520 |
| B4GALT4   | -0.115467576 | 0.008400105 | 0.01586398 | 520 | 520 |
| HTR3D     | -0.11547946  | 0.008393349 | 0.01585271 | 520 | 75  |
| ALDH4A1   | -0.115546474 | 0.008355338 | 0.01578535 | 520 | 520 |
| VAV3      | -0.115656142 | 0.008293463 | 0.01567727 | 520 | 520 |
| ZNF101    | -0.115714279 | 0.008260829 | 0.0156185  | 520 | 520 |
| RHOF      | -0.115742613 | 0.008244965 | 0.01558997 | 520 | 520 |
| OASL      | -0.115833855 | 0.008194066 | 0.01549664 | 520 | 520 |
| KREMEN2   | -0.115840757 | 0.008190227 | 0.01549083 | 520 | 520 |
| SERTAD1   | -0.115860073 | 0.008179492 | 0.01547343 | 520 | 520 |
| MIF4GD    | -0.116035418 | 0.008082617 | 0.01530165 | 520 | 520 |
| ACAD8     | -0.116097583 | 0.008048518 | 0.01524182 | 520 | 520 |
| ZNF787    | -0.1161248   | 0.00803363  | 0.01521605 | 520 | 520 |
| MGMT      | -0.11613886  | 0.008025948 | 0.01520293 | 520 | 520 |
| RBM5      | -0.116149775 | 0.008019989 | 0.01519307 | 520 | 520 |
| LTF       | -0.116178355 | 0.008004405 | 0.01516498 | 520 | 517 |
| PLK5P     | -0.116184632 | 0.008000986 | 0.01515992 | 520 | 289 |
| GRK7      | -0.116194766 | 0.007995469 | 0.01515089 | 520 | 480 |
| C19orf76  | -0.116216311 | 0.007983751 | 0.01513295 | 520 | 520 |
| SMPD3     | -0.11625673  | 0.007961808 | 0.0150942  | 520 | 520 |
| ODC1      | -0.116263555 | 0.007958108 | 0.0150886  | 520 | 520 |
| ZNF416    | -0.116277311 | 0.007950656 | 0.01507731 | 520 | 520 |
| SAA4      | -0.116295844 | 0.007940625 | 0.0150597  | 520 | 461 |
| LOC729156 | -0.116371648 | 0.007899716 | 0.01498776 | 520 | 428 |
| C3orf26   | -0.11639227  | 0.007888619 | 0.01496811 | 520 | 520 |
| DLEU1     | -0.116458278 | 0.007853194 | 0.01490791 | 520 | 520 |
| LY6K      | -0.116494328 | 0.007833907 | 0.0148755  | 520 | 520 |
| RPP14     | -0.11651329  | 0.007823778 | 0.01485766 | 520 | 520 |
| SPDYE1    | -0.116520933 | 0.0078197   | 0.01485272 | 520 | 517 |
| KLK15     | -0.116550137 | 0.007804131 | 0.01482733 | 520 | 189 |
| OLA1      | -0.116561465 | 0.0077981   | 0.01481727 | 520 | 520 |
| IFNG      | -0.116591086 | 0.007782349 | 0.01479013 | 520 | 485 |
| CLVS1     | -0.116622718 | 0.007765559 | 0.01475961 | 520 | 495 |
| KCNMB3    | -0.116664907 | 0.007743217 | 0.0147189  | 520 | 520 |
| HAUS4     | -0.116672457 | 0.007739224 | 0.01471372 | 520 | 520 |
| GEMIN4    | -0.116702217 | 0.007723506 | 0.01468522 | 520 | 520 |
| MAGOHB    | -0.11680278  | 0.007670603 | 0.01459564 | 520 | 520 |

|           |              |             |            |     |     |
|-----------|--------------|-------------|------------|-----|-----|
| CHCHD8    | -0.116816358 | 0.007663484 | 0.01458347 | 520 | 520 |
| NAA35     | -0.116819516 | 0.00766183  | 0.0145817  | 520 | 520 |
| UGT2A1    | -0.116852482 | 0.007644575 | 0.01455161 | 520 | 271 |
| SLC26A5   | -0.116894512 | 0.007622627 | 0.0145112  | 520 | 261 |
| CYP2S1    | -0.116897064 | 0.007621296 | 0.01451004 | 520 | 520 |
| TMEM68    | -0.116924326 | 0.007607092 | 0.01448436 | 520 | 520 |
| LOC391322 | -0.116953669 | 0.007591831 | 0.0144594  | 520 | 406 |
| NME3      | -0.117005724 | 0.007564824 | 0.01441069 | 520 | 520 |
| AURKC     | -0.117078681 | 0.007527117 | 0.01434292 | 520 | 520 |
| TULP1     | -0.117157009 | 0.007486821 | 0.01426883 | 520 | 472 |
| TCTE3     | -0.117167208 | 0.007481588 | 0.01426021 | 520 | 520 |
| TFAP2A    | -0.117170264 | 0.007480021 | 0.01425857 | 520 | 520 |
| C10orf28  | -0.117200454 | 0.007464554 | 0.01423089 | 520 | 520 |
| BCL2L14   | -0.117216499 | 0.007456345 | 0.01421747 | 520 | 510 |
| ZRSR2     | -0.117247773 | 0.007440369 | 0.01418835 | 520 | 520 |
| STOML3    | -0.117270534 | 0.007428761 | 0.01416889 | 520 | 330 |
| R3HCC1    | -0.117318272 | 0.007404467 | 0.01412657 | 520 | 520 |
| PSMA7     | -0.117465595 | 0.00732994  | 0.013991   | 520 | 520 |
| EXOSC4    | -0.117468212 | 0.007328622 | 0.01398981 | 520 | 520 |
| AQP2      | -0.117483579 | 0.007320889 | 0.01397637 | 520 | 212 |
| PLCH2     | -0.11749197  | 0.007316669 | 0.01396963 | 520 | 520 |
| HPRT1     | -0.117522159 | 0.007301505 | 0.01394332 | 520 | 520 |
| RASL11A   | -0.117582512 | 0.007271274 | 0.01388691 | 520 | 520 |
| BAT4      | -0.11760776  | 0.00725866  | 0.01386413 | 520 | 520 |
| LOC400759 | -0.117679627 | 0.007222863 | 0.01380099 | 520 | 520 |
| ACTL7B    | -0.117704312 | 0.007210604 | 0.01378017 | 520 | 198 |
| PKDREJ    | -0.117707838 | 0.007208854 | 0.01377814 | 520 | 513 |
| ACSBG1    | -0.117719483 | 0.007203079 | 0.01376971 | 520 | 518 |
| GOLPH3L   | -0.117739555 | 0.007193133 | 0.013752   | 520 | 520 |
| PAFAH2    | -0.11780454  | 0.00716102  | 0.01369736 | 520 | 520 |
| ANXA8     | -0.117836718 | 0.007145166 | 0.01367032 | 520 | 520 |
| IQCG      | -0.117837051 | 0.007145001 | 0.01367032 | 520 | 520 |
| ERAS      | -0.11785035  | 0.007138458 | 0.01366525 | 520 | 295 |
| C17orf61  | -0.117868386 | 0.007129593 | 0.01365123 | 520 | 520 |
| CDK11B    | -0.11787828  | 0.007124735 | 0.01364322 | 520 | 520 |
| AWAT1     | -0.117901061 | 0.007113558 | 0.01362312 | 520 | 105 |
| OSGEP     | -0.117958589 | 0.007085404 | 0.01357049 | 520 | 520 |
| ZNHIT1    | -0.117998341 | 0.007066008 | 0.01353591 | 520 | 520 |
| FAM84B    | -0.118056856 | 0.007037544 | 0.01348266 | 520 | 520 |
| CCDC108   | -0.118225695 | 0.006955987 | 0.01333528 | 520 | 257 |
| PPP1R3E   | -0.118230964 | 0.006953456 | 0.01333217 | 520 | 520 |
| TYMP      | -0.118237188 | 0.006950466 | 0.0133285  | 520 | 520 |
| SPINK9    | -0.118244917 | 0.006946756 | 0.01332392 | 520 | 118 |
| LOC145474 | -0.118257698 | 0.006940624 | 0.01331343 | 520 | 208 |
| MRPL21    | -0.118260451 | 0.006939304 | 0.01331216 | 520 | 520 |
| ACER1     | -0.118288921 | 0.006925665 | 0.01328726 | 520 | 427 |



|           |              |             |            |     |     |
|-----------|--------------|-------------|------------|-----|-----|
| TBC1D26   | -0.11833177  | 0.006905182 | 0.01325427 | 520 | 254 |
| MGC16142  | -0.118338904 | 0.006901777 | 0.01324899 | 520 | 519 |
| FIP1L1    | -0.118417053 | 0.006864577 | 0.0131826  | 520 | 520 |
| C21orf119 | -0.118497999 | 0.006826235 | 0.01311022 | 520 | 520 |
| RARS      | -0.118502382 | 0.006824164 | 0.01310749 | 520 | 520 |
| CLDN8     | -0.118502824 | 0.006823955 | 0.01310749 | 520 | 428 |
| NPC1L1    | -0.118521835 | 0.006814981 | 0.01309235 | 520 | 469 |
| PSPN      | -0.118529757 | 0.006811244 | 0.01308642 | 520 | 362 |
| CACNA1B   | -0.118537842 | 0.006807432 | 0.01308034 | 520 | 491 |
| AGPAT2    | -0.118601416 | 0.006777528 | 0.01302908 | 520 | 520 |
| LHX4      | -0.118719931 | 0.006722093 | 0.01292621 | 520 | 494 |
| TMEM201   | -0.118811894 | 0.006679358 | 0.01285016 | 520 | 520 |
| PI4K2B    | -0.118820525 | 0.00667536  | 0.01284492 | 520 | 520 |
| PLA2G4A   | -0.118832765 | 0.006669694 | 0.01283525 | 520 | 520 |
| DGAT1     | -0.118855564 | 0.00665915  | 0.01281863 | 520 | 520 |
| TSPO2     | -0.118871007 | 0.006652017 | 0.01280734 | 520 | 267 |
| ALOX15    | -0.118897688 | 0.00663971  | 0.01278609 | 520 | 491 |
| ENTPD8    | -0.118925328 | 0.006626981 | 0.01276401 | 520 | 428 |
| PQLC1     | -0.118968572 | 0.006607111 | 0.01272939 | 520 | 520 |
| POMZP3    | -0.119019683 | 0.006583695 | 0.01268913 | 520 | 520 |
| MUC17     | -0.119128529 | 0.006534076 | 0.01259951 | 520 | 220 |
| CEP78     | -0.119156314 | 0.006521463 | 0.0125776  | 520 | 520 |
| KRT33B    | -0.119175297 | 0.006512859 | 0.01256221 | 520 | 468 |
| CBX8      | -0.119217602 | 0.00649372  | 0.01252769 | 520 | 520 |
| NCF1C     | -0.119348422 | 0.006434856 | 0.01242363 | 520 | 519 |
| PPP1R10   | -0.119389377 | 0.006416526 | 0.01239062 | 520 | 520 |
| HMGB3     | -0.119396854 | 0.006413185 | 0.01238535 | 520 | 520 |
| FAM58A    | -0.119446706 | 0.006390947 | 0.01234359 | 520 | 520 |
| CRIP3     | -0.119452984 | 0.006388151 | 0.01233937 | 520 | 386 |
| SFXN5     | -0.119453461 | 0.006387939 | 0.01233937 | 520 | 520 |
| ABHD10    | -0.119563755 | 0.006339006 | 0.01225148 | 520 | 520 |
| PAK4      | -0.11964637  | 0.006302573 | 0.01218808 | 520 | 520 |
| NARS      | -0.119663343 | 0.006295111 | 0.01217598 | 520 | 520 |
| ERI1      | -0.119685117 | 0.006285551 | 0.01215982 | 520 | 520 |
| C2orf71   | -0.119718288 | 0.006271011 | 0.01213286 | 520 | 453 |
| PM20D2    | -0.119737677 | 0.006262526 | 0.01211761 | 520 | 520 |
| KLK6      | -0.119784663 | 0.006242007 | 0.01208175 | 520 | 514 |
| C16orf61  | -0.119793211 | 0.00623828  | 0.01207649 | 520 | 520 |
| SDHD      | -0.119858613 | 0.006209835 | 0.01202488 | 520 | 520 |
| HIST1H3E  | -0.119888264 | 0.006196978 | 0.01200114 | 520 | 520 |
| CCDC96    | -0.11989704  | 0.006193176 | 0.01199493 | 520 | 520 |
| YEATS4    | -0.119899112 | 0.006192279 | 0.01199434 | 520 | 520 |
| RAP1GAP   | -0.119926264 | 0.006180534 | 0.01197389 | 520 | 520 |
| SNORA31   | -0.119935691 | 0.006176461 | 0.01196715 | 520 | 94  |
| OCM2      | -0.119943108 | 0.006173258 | 0.0119621  | 520 | 85  |
| CES8      | -0.119954478 | 0.006168351 | 0.01195374 | 520 | 520 |

|            |              |             |            |     |     |
|------------|--------------|-------------|------------|-----|-----|
| CG030      | -0.120023039 | 0.006138835 | 0.01189768 | 520 | 520 |
| FAM136B    | -0.120026199 | 0.006137477 | 0.01189619 | 520 | 246 |
| MRPL43     | -0.120086114 | 0.006111793 | 0.01185324 | 520 | 520 |
| KLK8       | -0.120091633 | 0.006109431 | 0.01184981 | 520 | 517 |
| CYTH2      | -0.120093529 | 0.006108621 | 0.01184937 | 520 | 520 |
| RNF149     | -0.120124015 | 0.006095595 | 0.01182524 | 520 | 520 |
| ZCCHC7     | -0.120148281 | 0.006085244 | 0.01180744 | 520 | 520 |
| KRT19      | -0.120177509 | 0.006072798 | 0.01178442 | 520 | 518 |
| UFD1L      | -0.120182393 | 0.006070721 | 0.01178152 | 520 | 520 |
| NFKBIA     | -0.120185009 | 0.006069608 | 0.0117805  | 520 | 520 |
| RPL8       | -0.120198923 | 0.006063695 | 0.01177015 | 520 | 520 |
| DSG3       | -0.120205176 | 0.006061038 | 0.01176613 | 520 | 520 |
| ZNF133     | -0.120242157 | 0.006045351 | 0.01173681 | 520 | 520 |
| EPS8L3     | -0.120272165 | 0.006032649 | 0.01171666 | 520 | 203 |
| ROM1       | -0.120293212 | 0.006023754 | 0.01170276 | 520 | 520 |
| LMO4       | -0.120314664 | 0.0060147   | 0.01168742 | 520 | 520 |
| GCAT       | -0.120336391 | 0.006005542 | 0.01167188 | 520 | 520 |
| AK7        | -0.120353641 | 0.005998281 | 0.01166001 | 520 | 514 |
| ARHGEF4    | -0.120353801 | 0.005998213 | 0.01166001 | 520 | 520 |
| HIST2H2AA3 | -0.120364875 | 0.005993556 | 0.01165308 | 520 | 520 |
| SCARNA1    | -0.120366585 | 0.005992837 | 0.0116528  | 520 | 24  |
| SR140      | -0.120390586 | 0.005982754 | 0.01163544 | 520 | 520 |
| KRTAP5-10  | -0.120405756 | 0.00597639  | 0.01162448 | 520 | 261 |
| N6AMT2     | -0.120437605 | 0.005963047 | 0.01160047 | 520 | 520 |
| LGTN       | -0.120472233 | 0.00594857  | 0.01157342 | 520 | 520 |
| GUCY2C     | -0.120480025 | 0.005945317 | 0.01156821 | 520 | 471 |
| RTKN2      | -0.12052375  | 0.005927092 | 0.01153609 | 520 | 520 |
| UGT1A6     | -0.120540817 | 0.005919992 | 0.01152449 | 520 | 512 |
| SNORA57    | -0.120545385 | 0.005918092 | 0.01152198 | 520 | 221 |
| AASDH      | -0.120550175 | 0.005916102 | 0.01152026 | 520 | 520 |
| MS4A1      | -0.120569238 | 0.005908185 | 0.01150595 | 520 | 497 |
| SSTR5      | -0.120599346 | 0.0058957   | 0.01148386 | 520 | 399 |
| SERPINB5   | -0.120611157 | 0.005890809 | 0.01147655 | 520 | 520 |
| INPP5E     | -0.12066142  | 0.005870035 | 0.01143718 | 520 | 520 |
| WDR33      | -0.120669196 | 0.005866827 | 0.01143314 | 520 | 520 |
| WDR45L     | -0.120685956 | 0.005859919 | 0.01142078 | 520 | 520 |
| FAM66D     | -0.120697642 | 0.005855105 | 0.0114125  | 520 | 446 |
| HMBS       | -0.120743734 | 0.005836157 | 0.01137997 | 520 | 520 |
| AKR1C1     | -0.120802149 | 0.005812222 | 0.01133439 | 520 | 520 |
| EXD1       | -0.120882253 | 0.005779543 | 0.01127285 | 520 | 318 |
| TMED6      | -0.121044321 | 0.005713931 | 0.01115027 | 520 | 516 |
| KRT39      | -0.121082198 | 0.005698693 | 0.01112484 | 520 | 204 |
| PRR14      | -0.121162968 | 0.005666323 | 0.01106669 | 520 | 520 |
| SOLH       | -0.121295025 | 0.005613754 | 0.0109739  | 520 | 520 |
| C6orf114   | -0.121318352 | 0.005604514 | 0.0109569  | 520 | 520 |
| OTP        | -0.121336776 | 0.005597226 | 0.01094371 | 520 | 239 |

|           |              |             |            |     |     |
|-----------|--------------|-------------|------------|-----|-----|
| EFCAB4A   | -0.121375634 | 0.005581882 | 0.01091794 | 520 | 520 |
| ZDHHC3    | -0.121379044 | 0.005580537 | 0.01091637 | 520 | 520 |
| DNAI2     | -0.121386493 | 0.005577601 | 0.01091169 | 520 | 400 |
| TRIM38    | -0.12139672  | 0.005573571 | 0.01090486 | 520 | 520 |
| ZNF768    | -0.121451721 | 0.005551947 | 0.01086571 | 520 | 520 |
| LOC283332 | -0.121495333 | 0.005534853 | 0.01083436 | 520 | 73  |
| STK39     | -0.121497522 | 0.005533997 | 0.01083374 | 520 | 520 |
| CCNC      | -0.121499431 | 0.00553325  | 0.01083333 | 520 | 520 |
| UGT1A8    | -0.121515475 | 0.005526975 | 0.01082315 | 520 | 300 |
| BTBD6     | -0.121566041 | 0.005507241 | 0.0107866  | 520 | 520 |
| DMKN      | -0.121638623 | 0.005479026 | 0.01073968 | 520 | 520 |
| FAM71E2   | -0.121643529 | 0.005477123 | 0.01073804 | 520 | 345 |
| PMS2L4    | -0.121670021 | 0.005466861 | 0.01072104 | 520 | 520 |
| RPL31P11  | -0.121681413 | 0.005462453 | 0.01071344 | 520 | 512 |
| C20orf54  | -0.12170666  | 0.005452695 | 0.01069535 | 520 | 520 |
| RPPH1     | -0.121740049 | 0.005439816 | 0.01067194 | 520 | 520 |
| RASSF10   | -0.121758457 | 0.005432727 | 0.01065929 | 520 | 519 |
| PDAP1     | -0.121830379 | 0.005405108 | 0.0106082  | 520 | 520 |
| C7orf36   | -0.121831171 | 0.005404805 | 0.0106082  | 520 | 520 |
| RBMXL1    | -0.121859814 | 0.005393841 | 0.01058814 | 520 | 520 |
| CCT3      | -0.121883949 | 0.005384619 | 0.0105721  | 520 | 520 |
| C2orf76   | -0.121895119 | 0.005380356 | 0.01056476 | 520 | 520 |
| PDXDC2    | -0.121966106 | 0.005353332 | 0.01051784 | 520 | 520 |
| BAIAP3    | -0.121983567 | 0.005346704 | 0.01050584 | 520 | 520 |
| UBE2D3    | -0.121990756 | 0.005343977 | 0.01050151 | 520 | 520 |
| KRT74     | -0.122009946 | 0.005336704 | 0.01048926 | 520 | 516 |
| MS4A8B    | -0.122010544 | 0.005336478 | 0.01048926 | 520 | 189 |
| KBTBD3    | -0.122011419 | 0.005336146 | 0.01048926 | 520 | 520 |
| CD244     | -0.122023626 | 0.005331525 | 0.01048214 | 520 | 518 |
| LOC219347 | -0.122044945 | 0.005323463 | 0.01046936 | 520 | 520 |
| LY6G6D    | -0.122089752 | 0.005306554 | 0.01043814 | 520 | 266 |
| POMP      | -0.122150625 | 0.00528366  | 0.01039615 | 520 | 520 |
| WNK4      | -0.122153266 | 0.005282669 | 0.01039521 | 520 | 515 |
| C4orf7    | -0.122174185 | 0.005274823 | 0.01038079 | 520 | 482 |
| HIST1H3G  | -0.122265364 | 0.005240748 | 0.01031876 | 520 | 509 |
| C6orf57   | -0.122273819 | 0.005237599 | 0.01031458 | 520 | 520 |
| C7orf43   | -0.122281283 | 0.00523482  | 0.01031011 | 520 | 520 |
| TSGA10IP  | -0.12228477  | 0.005233522 | 0.01030856 | 520 | 379 |
| CAPN13    | -0.122321086 | 0.005220022 | 0.01028595 | 520 | 435 |
| SGTA      | -0.122345894 | 0.005210819 | 0.01027087 | 520 | 520 |
| PRC1      | -0.122346772 | 0.005210493 | 0.01027087 | 520 | 520 |
| TTK       | -0.122380744 | 0.005197914 | 0.01024843 | 520 | 520 |
| PHF11     | -0.122478288 | 0.005161948 | 0.01018051 | 520 | 520 |
| MBOAT1    | -0.12257465  | 0.005126638 | 0.01011285 | 520 | 520 |
| CPSF6     | -0.122631202 | 0.005106017 | 0.01007611 | 520 | 520 |
| ZACN      | -0.122660375 | 0.005095408 | 0.01005616 | 520 | 332 |

|           |              |             |            |     |     |
|-----------|--------------|-------------|------------|-----|-----|
| TNIP2     | -0.122689882 | 0.005084699 | 0.01003601 | 520 | 520 |
| BCL7B     | -0.122698506 | 0.005081572 | 0.01003082 | 520 | 520 |
| STAT6     | -0.122721334 | 0.005073305 | 0.01001842 | 520 | 520 |
| C7orf57   | -0.122744386 | 0.00506497  | 0.01000392 | 520 | 502 |
| AARSD1    | -0.122773795 | 0.005054353 | 0.00998491 | 520 | 520 |
| VPS52     | -0.122776371 | 0.005053424 | 0.00998405 | 520 | 520 |
| ZNF721    | -0.122782436 | 0.005051237 | 0.00998071 | 520 | 520 |
| GDF9      | -0.122930788 | 0.004998018 | 0.0098804  | 520 | 516 |
| ARAP2     | -0.12294134  | 0.004994252 | 0.00987489 | 520 | 520 |
| BRD8      | -0.12295116  | 0.004990749 | 0.00986893 | 520 | 520 |
| LOC729082 | -0.123097006 | 0.00493899  | 0.00977425 | 520 | 520 |
| CD47      | -0.123158681 | 0.004917248 | 0.00973504 | 520 | 520 |
| PRR7      | -0.123168486 | 0.004913799 | 0.00972917 | 520 | 520 |
| TSC22D4   | -0.123200557 | 0.004902535 | 0.00970782 | 520 | 520 |
| GCET2     | -0.123239438 | 0.00488891  | 0.00968274 | 520 | 520 |
| WNT2B     | -0.123240305 | 0.004888606 | 0.00968274 | 520 | 519 |
| ZNHIT2    | -0.123247899 | 0.004885949 | 0.00967878 | 520 | 404 |
| OTUB1     | -0.123296348 | 0.004869028 | 0.00964905 | 520 | 520 |
| STMN1     | -0.123311623 | 0.004863704 | 0.00963945 | 520 | 520 |
| CIB3      | -0.123317092 | 0.004861799 | 0.00963662 | 520 | 186 |
| IQCD      | -0.123346779 | 0.004851471 | 0.00961898 | 520 | 520 |
| CASP9     | -0.123516633 | 0.004792757 | 0.00950912 | 520 | 520 |
| GPATCH1   | -0.12354326  | 0.004783611 | 0.00949471 | 520 | 520 |
| C11orf20  | -0.123556499 | 0.00477907  | 0.0094885  | 520 | 500 |
| METTL11A  | -0.123560955 | 0.004777542 | 0.0094864  | 520 | 520 |
| TRIM40    | -0.123573865 | 0.004773118 | 0.00947948 | 520 | 229 |
| POLE4     | -0.123577743 | 0.00477179  | 0.00947947 | 520 | 520 |
| SLU7      | -0.123584083 | 0.00476962  | 0.00947626 | 520 | 520 |
| EPHA8     | -0.123601502 | 0.004763661 | 0.00946536 | 520 | 405 |
| PHF7      | -0.123605924 | 0.004762149 | 0.00946329 | 520 | 520 |
| TSPAN1    | -0.123607896 | 0.004761475 | 0.00946288 | 520 | 520 |
| PRKAB1    | -0.123639766 | 0.004750595 | 0.00944405 | 520 | 520 |
| C6orf62   | -0.123653073 | 0.004746059 | 0.00943596 | 520 | 520 |
| STX4      | -0.123669611 | 0.004740426 | 0.00942569 | 520 | 520 |
| AVPI1     | -0.12367893  | 0.004737255 | 0.00942125 | 520 | 520 |
| RPL10     | -0.123700854 | 0.004729802 | 0.00940735 | 520 | 520 |
| CALHM1    | -0.123753975 | 0.004711788 | 0.00937337 | 520 | 427 |
| C17orf55  | -0.123808701 | 0.004693294 | 0.00933842 | 520 | 512 |
| BEX2      | -0.123816986 | 0.0046905   | 0.00933379 | 520 | 518 |
| TTC4      | -0.123823727 | 0.004688228 | 0.00933018 | 520 | 520 |
| STOX1     | -0.123842361 | 0.004681952 | 0.00931861 | 520 | 518 |
| MANSC1    | -0.12388161  | 0.004668758 | 0.00929327 | 520 | 519 |
| SLC35D2   | -0.123892194 | 0.004665206 | 0.00928712 | 520 | 520 |
| KIAA1370  | -0.123919762 | 0.004655965 | 0.00926964 | 520 | 520 |
| MLF2      | -0.123933522 | 0.004651358 | 0.0092625  | 520 | 520 |
| C1orf27   | -0.123957694 | 0.004643276 | 0.00924803 | 520 | 520 |

|           |              |             |            |     |     |
|-----------|--------------|-------------|------------|-----|-----|
| P2RY2     | -0.12401988  | 0.004622543 | 0.00920946 | 520 | 520 |
| CLK4      | -0.124046872 | 0.00461357  | 0.00919249 | 520 | 520 |
| AGTPBP1   | -0.124064377 | 0.004607759 | 0.00918182 | 520 | 520 |
| FAM72D    | -0.12412132  | 0.004588901 | 0.00914605 | 520 | 520 |
| ITM2B     | -0.124168373 | 0.004573372 | 0.0091178  | 520 | 520 |
| NPM1      | -0.124216093 | 0.00455767  | 0.0090883  | 520 | 520 |
| GPSM2     | -0.124283617 | 0.004535536 | 0.00904774 | 520 | 520 |
| PRDX5     | -0.12429091  | 0.004533152 | 0.00904388 | 520 | 520 |
| FARSB     | -0.124326845 | 0.004521417 | 0.00902315 | 520 | 520 |
| GZMB      | -0.124353252 | 0.004512812 | 0.00900776 | 520 | 520 |
| GNL2      | -0.12439651  | 0.004498747 | 0.00898057 | 520 | 520 |
| CASP4     | -0.124442256 | 0.004483917 | 0.00895274 | 520 | 520 |
| ACN9      | -0.124518289 | 0.004459365 | 0.0089046  | 520 | 520 |
| P2RY11    | -0.124528583 | 0.00445605  | 0.00889886 | 520 | 519 |
| LOC606724 | -0.124539378 | 0.004452576 | 0.0088928  | 520 | 520 |
| HSPA1B    | -0.124853711 | 0.004352497 | 0.0087024  | 520 | 520 |
| C16orf88  | -0.124855651 | 0.004351886 | 0.00870205 | 520 | 520 |
| AP1S1     | -0.124909349 | 0.004334996 | 0.00867085 | 520 | 520 |
| BRCA1     | -0.124933534 | 0.004327408 | 0.00865825 | 520 | 520 |
| DDA1      | -0.124996974 | 0.004307562 | 0.00862025 | 520 | 520 |
| ERCC6L    | -0.125033057 | 0.004296311 | 0.0086003  | 520 | 520 |
| LEMD1     | -0.1250829   | 0.004280813 | 0.00857098 | 520 | 518 |
| DERA      | -0.125109162 | 0.004272667 | 0.00855637 | 520 | 520 |
| PODXL2    | -0.125190308 | 0.004247587 | 0.00850783 | 520 | 520 |
| KIAA1984  | -0.125230237 | 0.004235295 | 0.00848405 | 520 | 492 |
| SPAG6     | -0.125230298 | 0.004235277 | 0.00848405 | 520 | 384 |
| CDH24     | -0.125271493 | 0.004222629 | 0.00846204 | 520 | 520 |
| MFSD6L    | -0.125342139 | 0.004201018 | 0.00841957 | 520 | 476 |
| KATNAL2   | -0.12536501  | 0.004194043 | 0.00840643 | 520 | 518 |
| FAM164C   | -0.125371188 | 0.004192161 | 0.00840433 | 520 | 519 |
| ZNF389    | -0.125389517 | 0.004186581 | 0.00839398 | 520 | 509 |
| RFESD     | -0.125391002 | 0.004186129 | 0.0083939  | 520 | 520 |
| LOC642826 | -0.125398221 | 0.004183933 | 0.00839034 | 520 | 520 |
| TMPRSS12  | -0.12542684  | 0.004175239 | 0.00837457 | 520 | 231 |
| ZNF706    | -0.125432627 | 0.004173483 | 0.00837271 | 520 | 520 |
| C15orf61  | -0.125483552 | 0.00415806  | 0.00834426 | 520 | 520 |
| HIST1H2BO | -0.125506386 | 0.00415116  | 0.00833124 | 520 | 495 |
| RNF145    | -0.125517454 | 0.00414782  | 0.0083262  | 520 | 520 |
| CNOT7     | -0.125663296 | 0.004104031 | 0.00824404 | 520 | 520 |
| EIF3I     | -0.125692092 | 0.004095435 | 0.00822759 | 520 | 520 |
| HNRNPA1L2 | -0.125703448 | 0.004092049 | 0.00822161 | 520 | 520 |
| HIST1H3D  | -0.125732065 | 0.004083528 | 0.00820531 | 520 | 520 |
| AIM2      | -0.125773188 | 0.004071313 | 0.00818321 | 520 | 520 |
| HDHD1A    | -0.125835554 | 0.004052849 | 0.00814691 | 520 | 520 |
| AMMECR1   | -0.125847464 | 0.004049332 | 0.00814065 | 520 | 520 |
| MYO15B    | -0.125884519 | 0.004038407 | 0.0081195  | 520 | 520 |

|            |              |             |            |     |     |
|------------|--------------|-------------|------------|-----|-----|
| FAM156A    | -0.125891186 | 0.004036444 | 0.00811636 | 520 | 520 |
| C12orf36   | -0.125934875 | 0.004023602 | 0.00809296 | 520 | 480 |
| HES2       | -0.125969362 | 0.004013492 | 0.00807423 | 520 | 520 |
| EIF5B      | -0.125971383 | 0.0040129   | 0.00807385 | 520 | 520 |
| EIF2B3     | -0.125988979 | 0.004007751 | 0.0080659  | 520 | 520 |
| LARP7      | -0.125991717 | 0.00400695  | 0.0080651  | 520 | 520 |
| XRCC1      | -0.126021006 | 0.003998394 | 0.00804868 | 520 | 520 |
| C16orf5    | -0.126037129 | 0.003993691 | 0.00804127 | 520 | 520 |
| AKD1       | -0.126045399 | 0.003991281 | 0.00803837 | 520 | 520 |
| OR10AD1    | -0.126062452 | 0.003986315 | 0.00802998 | 520 | 132 |
| MELK       | -0.126126417 | 0.003967738 | 0.00799415 | 520 | 520 |
| BECN1      | -0.126128175 | 0.003967228 | 0.00799415 | 520 | 520 |
| C17orf75   | -0.126155707 | 0.003959257 | 0.00798025 | 520 | 520 |
| TRAPPC6B   | -0.126171586 | 0.003954667 | 0.0079718  | 520 | 520 |
| PRIM1      | -0.126191423 | 0.003948938 | 0.00796184 | 520 | 520 |
| C19orf53   | -0.126205754 | 0.003944805 | 0.0079543  | 520 | 520 |
| MFF        | -0.126267154 | 0.003927139 | 0.00792027 | 520 | 520 |
| NCRNA00093 | -0.126276215 | 0.003924538 | 0.00791581 | 520 | 261 |
| GART       | -0.126340221 | 0.00390621  | 0.00788042 | 520 | 520 |
| PDCD7      | -0.126341046 | 0.003905975 | 0.00788042 | 520 | 520 |
| DNAJC25    | -0.126342448 | 0.003905574 | 0.00788042 | 520 | 520 |
| ZNF554     | -0.126423407 | 0.003882506 | 0.00783731 | 520 | 520 |
| RANBP10    | -0.126468727 | 0.003869647 | 0.00781291 | 520 | 520 |
| C4orf21    | -0.126486169 | 0.003864708 | 0.00780372 | 520 | 520 |
| CCDC28A    | -0.126525562 | 0.003853574 | 0.0077828  | 520 | 520 |
| OR52A1     | -0.126616842 | 0.003827888 | 0.00773325 | 520 | 23  |
| DBR1       | -0.126623493 | 0.003826023 | 0.00773103 | 520 | 520 |
| C19orf42   | -0.126628774 | 0.003824542 | 0.00772881 | 520 | 520 |
| TINF2      | -0.126681268 | 0.003809852 | 0.00770298 | 520 | 520 |
| AGPAT3     | -0.126685488 | 0.003808674 | 0.00770137 | 520 | 520 |
| ORMDL1     | -0.126710148 | 0.003801792 | 0.00768823 | 520 | 520 |
| CYP4A11    | -0.126719032 | 0.003799316 | 0.00768399 | 520 | 293 |
| TSSK6      | -0.126751635 | 0.003790241 | 0.00766641 | 520 | 520 |
| HGD        | -0.126762656 | 0.003787178 | 0.00766098 | 520 | 394 |
| GRSF1      | -0.12681207  | 0.003773471 | 0.00763402 | 520 | 520 |
| FCAMR      | -0.1268199   | 0.003771303 | 0.0076304  | 520 | 319 |
| CYP4A22    | -0.126891485 | 0.003751537 | 0.00759193 | 520 | 105 |
| CLNS1A     | -0.126925093 | 0.003742289 | 0.00757474 | 520 | 520 |
| TMEM187    | -0.126952215 | 0.003734841 | 0.00756042 | 520 | 520 |
| PPP1CC     | -0.126968568 | 0.003730357 | 0.0075521  | 520 | 520 |
| C19orf47   | -0.126968646 | 0.003730335 | 0.0075521  | 520 | 520 |
| SLC35A4    | -0.127001375 | 0.003721375 | 0.00753619 | 520 | 520 |
| GBA2       | -0.127033756 | 0.00371253  | 0.00751903 | 520 | 520 |
| LEKR1      | -0.127075642 | 0.003701116 | 0.00749667 | 520 | 514 |
| CYP2R1     | -0.127118503 | 0.00368947  | 0.00747608 | 520 | 520 |
| AZGP1      | -0.127206649 | 0.003665622 | 0.00742925 | 520 | 511 |

|            |              |             |            |     |     |
|------------|--------------|-------------|------------|-----|-----|
| MED25      | -0.127238591 | 0.003657015 | 0.00741255 | 520 | 520 |
| NCRNA00116 | -0.127250914 | 0.0036537   | 0.00740657 | 520 | 520 |
| C22orf27   | -0.127262179 | 0.003650671 | 0.00740183 | 520 | 520 |
| C9orf130   | -0.127262455 | 0.003650597 | 0.00740183 | 520 | 520 |
| RRH        | -0.127351722 | 0.003626678 | 0.00735698 | 520 | 415 |
| FLYWCH2    | -0.127367227 | 0.003622538 | 0.00734932 | 520 | 520 |
| PHF5A      | -0.127387896 | 0.003617026 | 0.00734035 | 520 | 520 |
| CD19       | -0.127398787 | 0.003614125 | 0.0073352  | 520 | 489 |
| DSCR6      | -0.127429792 | 0.003605876 | 0.0073192  | 520 | 481 |
| PSMC4      | -0.127443128 | 0.003602334 | 0.00731274 | 520 | 520 |
| XCL2       | -0.127464209 | 0.00359674  | 0.00730212 | 520 | 514 |
| MNX1       | -0.127474789 | 0.003593936 | 0.00729716 | 520 | 450 |
| MRI1       | -0.127529269 | 0.003579527 | 0.00726937 | 520 | 520 |
| CBWD3      | -0.127542966 | 0.003575913 | 0.00726276 | 520 | 520 |
| CIAO1      | -0.127546896 | 0.003574877 | 0.00726139 | 520 | 520 |
| FTSJ2      | -0.12768619  | 0.003538317 | 0.0071893  | 520 | 520 |
| POLR2E     | -0.127712352 | 0.003531489 | 0.00717615 | 520 | 520 |
| MRM1       | -0.12777246  | 0.003515846 | 0.00714796 | 520 | 520 |
| TMEM161A   | -0.127780593 | 0.003513734 | 0.00714439 | 520 | 520 |
| PLCD1      | -0.127816394 | 0.003504451 | 0.00712624 | 520 | 520 |
| PAK1IP1    | -0.127838387 | 0.00349876  | 0.00711538 | 520 | 520 |
| CUZD1      | -0.127847103 | 0.003496507 | 0.00711152 | 520 | 511 |
| SFRS17A    | -0.127854183 | 0.003494677 | 0.00710851 | 520 | 520 |
| SPINLW1    | -0.127921946 | 0.003477213 | 0.00707441 | 520 | 120 |
| ABHD3      | -0.12792236  | 0.003477107 | 0.00707441 | 520 | 520 |
| RPS6KA5    | -0.127927315 | 0.003475833 | 0.00707375 | 520 | 520 |
| NKAP       | -0.127955061 | 0.003468707 | 0.00706067 | 520 | 520 |
| PSORS1C3   | -0.128010561 | 0.003454494 | 0.00703387 | 520 | 332 |
| MTCP1      | -0.128021142 | 0.00345179  | 0.00702908 | 520 | 520 |
| EIF3J      | -0.128037731 | 0.003447555 | 0.00702116 | 520 | 520 |
| FAHD1      | -0.128047465 | 0.003445073 | 0.00701681 | 520 | 520 |
| SEC31B     | -0.128093697 | 0.003433302 | 0.00699496 | 520 | 520 |
| OXGR1      | -0.128119324 | 0.003426794 | 0.0069824  | 520 | 477 |
| C6orf124   | -0.12813525  | 0.003422755 | 0.00697488 | 520 | 519 |
| ZDHHC6     | -0.128164082 | 0.003415453 | 0.00696141 | 520 | 520 |
| RBM22      | -0.128205466 | 0.003404998 | 0.0069415  | 520 | 520 |
| NOS2       | -0.128237206 | 0.003396999 | 0.00692659 | 520 | 514 |
| FLJ25328   | -0.128355586 | 0.003367247 | 0.00686871 | 520 | 76  |
| TRIM25     | -0.128357482 | 0.003366842 | 0.00686857 | 520 | 520 |
| METTL10    | -0.128379727 | 0.003361291 | 0.00685864 | 520 | 520 |
| RNF43      | -0.128386237 | 0.003359668 | 0.00685602 | 520 | 520 |
| RPRML      | -0.12840033  | 0.003356157 | 0.00684955 | 520 | 139 |
| MIPEP      | -0.128463343 | 0.0033405   | 0.00681828 | 520 | 520 |
| NCRNA00183 | -0.128531205 | 0.003323712 | 0.00678677 | 520 | 520 |
| AKTIP      | -0.128568773 | 0.003314451 | 0.00676991 | 520 | 520 |
| C1orf201   | -0.128583085 | 0.00331093  | 0.00676341 | 520 | 520 |

|           |              |             |            |     |     |
|-----------|--------------|-------------|------------|-----|-----|
| LYPD4     | -0.128598976 | 0.003307023 | 0.00675611 | 520 | 125 |
| TDRD5     | -0.128604238 | 0.003305731 | 0.00675415 | 520 | 432 |
| COG2      | -0.128662183 | 0.003291527 | 0.00672693 | 520 | 520 |
| RNASE12   | -0.128663257 | 0.003291264 | 0.00672693 | 520 | 10  |
| SUOX      | -0.128852085 | 0.003245366 | 0.00663889 | 520 | 520 |
| SMAP1     | -0.128858119 | 0.003243908 | 0.00663658 | 520 | 520 |
| GLYCTK    | -0.128860357 | 0.003243368 | 0.00663615 | 520 | 520 |
| PSMD14    | -0.128860553 | 0.003243321 | 0.00663615 | 520 | 520 |
| C1orf110  | -0.128914132 | 0.003230411 | 0.006613   | 520 | 454 |
| THAP9     | -0.128994402 | 0.003211157 | 0.00657625 | 520 | 520 |
| SCAPER    | -0.129037079 | 0.003200963 | 0.00655671 | 520 | 520 |
| SRMS      | -0.12904776  | 0.003198417 | 0.00655282 | 520 | 478 |
| SDC1      | -0.129057218 | 0.003196163 | 0.00654887 | 520 | 520 |
| RPL32P3   | -0.129082627 | 0.003190116 | 0.00653714 | 520 | 520 |
| PTGES     | -0.129153474 | 0.00317331  | 0.00650337 | 520 | 520 |
| MRPS27    | -0.129197405 | 0.003162929 | 0.00648275 | 520 | 520 |
| BARX2     | -0.129199296 | 0.003162483 | 0.0064825  | 520 | 519 |
| CHAC2     | -0.129200723 | 0.003162146 | 0.00648246 | 520 | 519 |
| TMEM129   | -0.129201557 | 0.003161949 | 0.00648246 | 520 | 520 |
| CPSF4     | -0.129210596 | 0.003159818 | 0.00647967 | 520 | 520 |
| ANKRD54   | -0.129288838 | 0.003141423 | 0.00644326 | 520 | 520 |
| SPAG5     | -0.129349738 | 0.003127172 | 0.00641598 | 520 | 520 |
| PBX4      | -0.129411084 | 0.003112876 | 0.00638795 | 520 | 520 |
| ABHD12    | -0.129446385 | 0.003104677 | 0.00637178 | 520 | 520 |
| C14orf119 | -0.129467195 | 0.003099853 | 0.00636252 | 520 | 520 |
| ACRC      | -0.129548554 | 0.003081057 | 0.00632652 | 520 | 520 |
| AK3       | -0.12961726  | 0.003065265 | 0.00629538 | 520 | 520 |
| KCNG3     | -0.129648803 | 0.00305804  | 0.00628118 | 520 | 472 |
| UCN       | -0.129762224 | 0.003032186 | 0.00623061 | 520 | 483 |
| RRM1      | -0.129838053 | 0.003015013 | 0.00619785 | 520 | 520 |
| CXorf58   | -0.129890147 | 0.003003267 | 0.00617433 | 520 | 416 |
| CCDC157   | -0.129991993 | 0.002980422 | 0.00612924 | 520 | 520 |
| BCDIN3D   | -0.129994503 | 0.002979861 | 0.00612871 | 520 | 520 |
| MYO3A     | -0.130033978 | 0.00297105  | 0.00611184 | 520 | 448 |
| RBM6      | -0.130061223 | 0.002964983 | 0.00610185 | 520 | 520 |
| TMEM81    | -0.130093525 | 0.002957804 | 0.0060877  | 520 | 520 |
| ZMYND17   | -0.130159428 | 0.002943208 | 0.00605951 | 520 | 520 |
| PLEKHG5   | -0.130165825 | 0.002941794 | 0.00605722 | 520 | 520 |
| TARBP1    | -0.130175885 | 0.002939573 | 0.00605326 | 520 | 520 |
| ARHGEF10L | -0.130176245 | 0.002939493 | 0.00605326 | 520 | 520 |
| C17orf68  | -0.130240532 | 0.002925334 | 0.00602579 | 520 | 520 |
| LGALS9B   | -0.130321352 | 0.002907621 | 0.00599236 | 520 | 497 |
| SLC16A5   | -0.130375477 | 0.002895814 | 0.00597047 | 520 | 520 |
| RNF186    | -0.130421191 | 0.002885875 | 0.00595059 | 520 | 176 |
| SNORA63   | -0.130423667 | 0.002885338 | 0.00595009 | 520 | 236 |
| LIN7C     | -0.130582579 | 0.002851035 | 0.00588236 | 520 | 520 |



|          |              |             |            |     |     |
|----------|--------------|-------------|------------|-----|-----|
| CASR     | -0.130612899 | 0.002844533 | 0.00587014 | 520 | 330 |
| SLC34A2  | -0.130731464 | 0.002819235 | 0.00581972 | 520 | 474 |
| RBMX     | -0.13073235  | 0.002819047 | 0.00581972 | 520 | 520 |
| ZNF600   | -0.130742842 | 0.002816818 | 0.00581592 | 520 | 520 |
| SNORD22  | -0.130782028 | 0.002808509 | 0.00579996 | 520 | 121 |
| PVT1     | -0.130792168 | 0.002806362 | 0.00579671 | 520 | 520 |
| MKNK1    | -0.130818506 | 0.002800794 | 0.0057858  | 520 | 520 |
| HIST2H3C | -0.130823915 | 0.002799651 | 0.00578403 | 520 | 509 |
| DNHD1    | -0.130847365 | 0.002794704 | 0.005775   | 520 | 520 |
| ACSBG2   | -0.130929979 | 0.002777337 | 0.0057397  | 520 | 339 |
| PDZK1P1  | -0.1310005   | 0.002762589 | 0.00571039 | 520 | 505 |
| KATNA1   | -0.131008742 | 0.002760871 | 0.00570742 | 520 | 520 |
| EPGN     | -0.131041384 | 0.002754073 | 0.00569512 | 520 | 491 |
| ADCK5    | -0.131078251 | 0.002746413 | 0.00568103 | 520 | 520 |
| REPIN1   | -0.131109226 | 0.002739993 | 0.00566833 | 520 | 520 |
| CINP     | -0.131109768 | 0.00273988  | 0.00566833 | 520 | 520 |
| NUPR1    | -0.131129172 | 0.002735866 | 0.0056612  | 520 | 520 |
| XAB2     | -0.131183273 | 0.0027247   | 0.00563959 | 520 | 520 |
| UBE2E1   | -0.131189157 | 0.002723488 | 0.00563766 | 520 | 520 |
| RIPPLY2  | -0.131281981 | 0.002704435 | 0.00560052 | 520 | 212 |
| PANK2    | -0.131314911 | 0.002697705 | 0.00558773 | 520 | 520 |
| FETUB    | -0.131342076 | 0.002692165 | 0.00557682 | 520 | 475 |
| AADAACL2 | -0.131364633 | 0.002687572 | 0.00556845 | 520 | 388 |
| C5orf43  | -0.131385585 | 0.002683313 | 0.0055602  | 520 | 520 |
| VSIG10   | -0.131391181 | 0.002682176 | 0.00555842 | 520 | 520 |
| FAM182B  | -0.131412592 | 0.002677831 | 0.00554998 | 520 | 518 |
| MPP7     | -0.131421526 | 0.00267602  | 0.0055468  | 520 | 520 |
| ALG14    | -0.13146986  | 0.002666242 | 0.00552824 | 520 | 520 |
| FOXD3    | -0.131489509 | 0.002662276 | 0.00552058 | 520 | 481 |
| C2orf85  | -0.131575953 | 0.002644892 | 0.00548566 | 520 | 334 |
| FOXRED1  | -0.131587134 | 0.002642652 | 0.00548158 | 520 | 520 |
| H3F3C    | -0.131593406 | 0.002641395 | 0.00547954 | 520 | 520 |
| UPP1     | -0.131618329 | 0.002636408 | 0.00547032 | 520 | 520 |
| C19orf45 | -0.131667054 | 0.002626684 | 0.00545238 | 520 | 358 |
| TM7SF3   | -0.131743192 | 0.002611555 | 0.00542154 | 520 | 520 |
| TIMM50   | -0.131803199 | 0.002599686 | 0.00539801 | 520 | 520 |
| DPH5     | -0.131804467 | 0.002599436 | 0.00539801 | 520 | 520 |
| AGPHD1   | -0.13182685  | 0.002595022 | 0.00538999 | 520 | 519 |
| KRTAP5-7 | -0.131847037 | 0.002591047 | 0.00538229 | 520 | 151 |
| RNF5     | -0.131899839 | 0.002580676 | 0.00536295 | 520 | 520 |
| SIM2     | -0.131900144 | 0.002580616 | 0.00536295 | 520 | 520 |
| ADH6     | -0.131909957 | 0.002578693 | 0.00535994 | 520 | 342 |
| LRRC4    | -0.131918856 | 0.00257695  | 0.00535687 | 520 | 520 |
| MYL6     | -0.131920119 | 0.002576703 | 0.00535687 | 520 | 520 |
| TRIM41   | -0.131940633 | 0.002572689 | 0.00534967 | 520 | 520 |
| CXorf65  | -0.131949534 | 0.00257095  | 0.0053466  | 520 | 368 |

|            |              |             |            |     |     |
|------------|--------------|-------------|------------|-----|-----|
| ARG2       | -0.131978896 | 0.002565219 | 0.00533633 | 520 | 520 |
| PIH1D2     | -0.131987383 | 0.002563565 | 0.00533344 | 520 | 520 |
| FBXL6      | -0.131999643 | 0.002561177 | 0.00532957 | 520 | 520 |
| ZUFSP      | -0.132047077 | 0.002551956 | 0.00531148 | 520 | 520 |
| SFT2D2     | -0.132049463 | 0.002551493 | 0.00531148 | 520 | 520 |
| CATSPERB   | -0.132124705 | 0.002536932 | 0.00528294 | 520 | 494 |
| HIST4H4    | -0.132126178 | 0.002536647 | 0.00528289 | 520 | 520 |
| STK19      | -0.132357641 | 0.002492332 | 0.00519221 | 520 | 520 |
| C20orf7    | -0.132371419 | 0.002489716 | 0.00518783 | 520 | 520 |
| HRH3       | -0.13248481  | 0.002468286 | 0.0051453  | 520 | 301 |
| MNAT1      | -0.132654938 | 0.002436448 | 0.00508156 | 520 | 520 |
| GDPD2      | -0.132690972 | 0.002429752 | 0.00506917 | 520 | 511 |
| KRT16      | -0.132691896 | 0.002429581 | 0.00506917 | 520 | 520 |
| PNRC2      | -0.13270785  | 0.002426622 | 0.00506369 | 520 | 520 |
| GNB2       | -0.132712211 | 0.002425814 | 0.00506307 | 520 | 520 |
| GUF1       | -0.132753321 | 0.002418207 | 0.00504874 | 520 | 520 |
| CDRT15     | -0.132780035 | 0.002413276 | 0.00504053 | 520 | 60  |
| AFMID      | -0.132860234 | 0.002398527 | 0.0050118  | 520 | 520 |
| TMEM59     | -0.13293153  | 0.002385485 | 0.00498714 | 520 | 520 |
| CYP3A4     | -0.132995204 | 0.002373891 | 0.00496444 | 520 | 332 |
| ABCA12     | -0.13305061  | 0.002363845 | 0.00494548 | 520 | 520 |
| HUS1B      | -0.133069399 | 0.002360447 | 0.00493889 | 520 | 509 |
| RDH12      | -0.133106712 | 0.002353712 | 0.00492582 | 520 | 520 |
| SGK2       | -0.133146761 | 0.002346503 | 0.00491175 | 520 | 470 |
| FAM117B    | -0.13320527  | 0.002336007 | 0.0048908  | 520 | 520 |
| GFER       | -0.133219053 | 0.002333541 | 0.00488665 | 520 | 520 |
| NCRNA00176 | -0.133259963 | 0.002326235 | 0.00487185 | 520 | 519 |
| ZNF846     | -0.133330347 | 0.002313714 | 0.00484714 | 520 | 520 |
| USP39      | -0.133344419 | 0.002311218 | 0.00484342 | 520 | 520 |
| NUP35      | -0.13336349  | 0.002307839 | 0.00483735 | 520 | 520 |
| PTPMT1     | -0.133404631 | 0.002300565 | 0.0048231  | 520 | 520 |
| PSMB5      | -0.133432328 | 0.00229568  | 0.00481336 | 520 | 520 |
| METAP2     | -0.133488721 | 0.002285764 | 0.00479307 | 520 | 520 |
| SNORA41    | -0.133491843 | 0.002285216 | 0.00479242 | 520 | 16  |
| FUK        | -0.133496268 | 0.002284439 | 0.00479129 | 520 | 520 |
| C19orf60   | -0.133512277 | 0.002281633 | 0.0047859  | 520 | 520 |
| CALML6     | -0.133512368 | 0.002281617 | 0.0047859  | 520 | 384 |
| TRPV6      | -0.13355753  | 0.002273717 | 0.00477078 | 520 | 491 |
| ISCU       | -0.133568471 | 0.002271807 | 0.00476777 | 520 | 520 |
| KIF9       | -0.133594486 | 0.00226727  | 0.00475874 | 520 | 520 |
| IFI27      | -0.133698846 | 0.002249157 | 0.0047222  | 520 | 520 |
| CFLP1      | -0.133699147 | 0.002249105 | 0.0047222  | 520 | 360 |
| TBC1D8     | -0.133718808 | 0.002245707 | 0.00471643 | 520 | 520 |
| FAM95B1    | -0.133726597 | 0.002244362 | 0.0047141  | 520 | 508 |
| CCDC76     | -0.133730904 | 0.002243619 | 0.00471303 | 520 | 520 |
| ALKBH3     | -0.13378498  | 0.002234306 | 0.00469689 | 520 | 520 |

|              |              |             |            |     |     |
|--------------|--------------|-------------|------------|-----|-----|
| TRIM28       | -0.13378921  | 0.002233579 | 0.00469585 | 520 | 520 |
| KRT15        | -0.133806856 | 0.002230549 | 0.00468997 | 520 | 520 |
| CHMP5        | -0.133834271 | 0.002225848 | 0.00468057 | 520 | 520 |
| MRPL17       | -0.133882566 | 0.00221759  | 0.00466418 | 520 | 520 |
| MAP2K7       | -0.133914536 | 0.002212138 | 0.00465368 | 520 | 520 |
| CTAGE6       | -0.133919449 | 0.002211302 | 0.00465273 | 520 | 500 |
| C9orf43      | -0.133930004 | 0.002209505 | 0.0046496  | 520 | 519 |
| PPP1R1B      | -0.133934562 | 0.00220873  | 0.00464894 | 520 | 467 |
| S100A7A      | -0.133964437 | 0.002203653 | 0.00463922 | 520 | 518 |
| ACSF3        | -0.133973163 | 0.002202173 | 0.00463659 | 520 | 520 |
| DFNB59       | -0.133973386 | 0.002202135 | 0.00463659 | 520 | 514 |
| NFX1         | -0.134072742 | 0.002185341 | 0.00460451 | 520 | 520 |
| EDN2         | -0.134123205 | 0.002176855 | 0.0045876  | 520 | 518 |
| CHRNA10      | -0.134153314 | 0.002171807 | 0.00457839 | 520 | 518 |
| QRICH2       | -0.134193159 | 0.002165143 | 0.00456482 | 520 | 520 |
| C4orf43      | -0.134355837 | 0.002138128 | 0.00451069 | 520 | 520 |
| SF3A2        | -0.134361567 | 0.002137182 | 0.00450917 | 520 | 520 |
| GRIPAP1      | -0.134388774 | 0.002132696 | 0.00450018 | 520 | 520 |
| PSMD3        | -0.134449628 | 0.002122693 | 0.00448094 | 520 | 520 |
| TMEM211      | -0.134458881 | 0.002121175 | 0.00447821 | 520 | 196 |
| HNF1A        | -0.134482955 | 0.002117233 | 0.00447129 | 520 | 518 |
| ARPC5        | -0.134499014 | 0.002114606 | 0.00446621 | 520 | 520 |
| RTDR1        | -0.134547406 | 0.00210671  | 0.00445    | 520 | 469 |
| ZNF544       | -0.134553052 | 0.00210579  | 0.00444852 | 520 | 520 |
| TP53AIP1     | -0.134608883 | 0.002096717 | 0.00443029 | 520 | 519 |
| LOC388946    | -0.134643013 | 0.002091189 | 0.00441999 | 520 | 44  |
| NSUN7        | -0.134682701 | 0.002084776 | 0.0044069  | 520 | 514 |
| MCCC2        | -0.13474901  | 0.002074103 | 0.00438526 | 520 | 520 |
| HMGCL        | -0.134801333 | 0.002065716 | 0.00436798 | 520 | 520 |
| MRFAP1L1     | -0.134814551 | 0.002063602 | 0.00436425 | 520 | 520 |
| CCDC73       | -0.134863392 | 0.002055809 | 0.00434886 | 520 | 519 |
| TARS2        | -0.134882495 | 0.002052768 | 0.00434334 | 520 | 520 |
| FBXO22       | -0.134902521 | 0.002049585 | 0.00433706 | 520 | 520 |
| PTTG2        | -0.134944064 | 0.002042995 | 0.00432448 | 520 | 518 |
| CELP         | -0.134963657 | 0.002039894 | 0.00431927 | 520 | 143 |
| CHST9        | -0.134995831 | 0.002034811 | 0.00430971 | 520 | 380 |
| RETSAT       | -0.135041523 | 0.002027613 | 0.00429688 | 520 | 520 |
| KRTAP5-1     | -0.135070746 | 0.002023021 | 0.00428805 | 520 | 389 |
| CPNE6        | -0.135110143 | 0.002016846 | 0.00427631 | 520 | 233 |
| LOC100009676 | -0.135141957 | 0.002011871 | 0.00426666 | 520 | 520 |
| PHPT1        | -0.135181099 | 0.002005767 | 0.00425461 | 520 | 520 |
| GPD1L        | -0.135237411 | 0.001997015 | 0.00423738 | 520 | 520 |
| LOC220729    | -0.135240525 | 0.001996532 | 0.0042368  | 520 | 520 |
| CLEC2D       | -0.135303967 | 0.001986715 | 0.00421685 | 520 | 520 |
| KARS         | -0.135336753 | 0.001981659 | 0.00420657 | 520 | 520 |
| LYRM7        | -0.135378947 | 0.00197517  | 0.00419367 | 520 | 520 |

|          |              |             |            |     |     |
|----------|--------------|-------------|------------|-----|-----|
| MRPS23   | -0.135404513 | 0.001971248 | 0.00418623 | 520 | 520 |
| ALAS1    | -0.135415252 | 0.001969602 | 0.00418317 | 520 | 520 |
| ZAN      | -0.13542025  | 0.001968837 | 0.00418199 | 520 | 471 |
| ARHGAP4  | -0.135470143 | 0.001961211 | 0.00416799 | 520 | 520 |
| PDZD11   | -0.135479169 | 0.001959834 | 0.00416594 | 520 | 520 |
| TPI1P3   | -0.135506312 | 0.0019557   | 0.00415803 | 520 | 428 |
| PAIP2B   | -0.135588303 | 0.001943259 | 0.00413245 | 520 | 520 |
| BTBD16   | -0.135675764 | 0.001930068 | 0.00410613 | 520 | 476 |
| C9orf37  | -0.135765486 | 0.001916621 | 0.00407881 | 520 | 520 |
| IL1F7    | -0.135794272 | 0.001912325 | 0.0040701  | 520 | 358 |
| UGT1A9   | -0.135826461 | 0.001907532 | 0.00406033 | 520 | 387 |
| DOC2B    | -0.135847448 | 0.001904413 | 0.00405411 | 520 | 515 |
| TWF1     | -0.135889566 | 0.001898167 | 0.00404167 | 520 | 520 |
| APC2     | -0.13593264  | 0.001891798 | 0.00402854 | 520 | 520 |
| UPF3A    | -0.135935833 | 0.001891327 | 0.00402796 | 520 | 520 |
| SFRS13A  | -0.135952109 | 0.001888926 | 0.00402327 | 520 | 520 |
| DND1     | -0.135999375 | 0.00188197  | 0.0040093  | 520 | 520 |
| HRSP12   | -0.136017439 | 0.001879318 | 0.0040045  | 520 | 520 |
| IRF3     | -0.136028773 | 0.001877656 | 0.00400138 | 520 | 520 |
| RWDD3    | -0.136117579 | 0.001864678 | 0.00397582 | 520 | 520 |
| IFI16    | -0.136147987 | 0.001860253 | 0.00396723 | 520 | 520 |
| INSL6    | -0.136162468 | 0.001858149 | 0.00396316 | 520 | 65  |
| NR5A1    | -0.13619566  | 0.001853334 | 0.00395331 | 520 | 411 |
| ABCC5    | -0.136224866 | 0.001849108 | 0.00394596 | 520 | 520 |
| MYO1A    | -0.136313714 | 0.001836304 | 0.00391947 | 520 | 444 |
| RGL2     | -0.136315062 | 0.001836111 | 0.00391947 | 520 | 520 |
| CLEC2B   | -0.136409059 | 0.001822655 | 0.00389363 | 520 | 520 |
| SMC4     | -0.136426452 | 0.001820175 | 0.00388875 | 520 | 520 |
| ZNF830   | -0.136428155 | 0.001819933 | 0.00388864 | 520 | 520 |
| TMEM9B   | -0.136428918 | 0.001819824 | 0.00388864 | 520 | 520 |
| SLC25A14 | -0.136429344 | 0.001819763 | 0.00388864 | 520 | 520 |
| ASPSCR1  | -0.136436956 | 0.001818679 | 0.0038872  | 520 | 520 |
| SLC38A8  | -0.136444049 | 0.001817669 | 0.00388545 | 520 | 224 |
| ARRDC5   | -0.136509702 | 0.001808348 | 0.00386676 | 520 | 463 |
| SPRN     | -0.13658011  | 0.001798401 | 0.0038459  | 520 | 520 |
| FO XK2   | -0.136584535 | 0.001797777 | 0.00384497 | 520 | 520 |
| MBD1     | -0.136631755 | 0.001791136 | 0.00383158 | 520 | 520 |
| ZNF341   | -0.136656616 | 0.001787648 | 0.00382493 | 520 | 520 |
| BMS1P5   | -0.136658069 | 0.001787445 | 0.0038249  | 520 | 519 |
| CEP63    | -0.136672082 | 0.001785482 | 0.00382111 | 520 | 520 |
| CRYBB2   | -0.136715052 | 0.001779475 | 0.00380866 | 520 | 485 |
| CXCR2    | -0.136726157 | 0.001777926 | 0.00380574 | 520 | 519 |
| CLDN22   | -0.136738872 | 0.001776154 | 0.00380235 | 520 | 51  |
| RMI1     | -0.136769464 | 0.001771896 | 0.00379364 | 520 | 520 |
| CLIC1    | -0.136779515 | 0.001770499 | 0.00379105 | 520 | 520 |
| GPD2     | -0.136792635 | 0.001768677 | 0.00378755 | 520 | 520 |

|              |              |             |            |     |     |
|--------------|--------------|-------------|------------|-----|-----|
| LDHC         | -0.136801405 | 0.001767461 | 0.00378575 | 520 | 405 |
| LOC284900    | -0.136870005 | 0.001757969 | 0.00376622 | 520 | 520 |
| UPK1A        | -0.136892641 | 0.001754847 | 0.00375993 | 520 | 462 |
| CCT7         | -0.136908136 | 0.001752713 | 0.00375616 | 520 | 520 |
| MPST         | -0.136920939 | 0.001750952 | 0.00375278 | 520 | 520 |
| ACTL8        | -0.136924581 | 0.001750451 | 0.00375211 | 520 | 433 |
| SYNGR4       | -0.136927501 | 0.00175005  | 0.00375205 | 520 | 451 |
| UBE2C        | -0.137007494 | 0.001739086 | 0.00372973 | 520 | 520 |
| GOLGA6L1     | -0.137030958 | 0.001735882 | 0.00372366 | 520 | 450 |
| HIST1H2BK    | -0.137072507 | 0.001730222 | 0.0037123  | 520 | 520 |
| GPKOW        | -0.137100907 | 0.001726363 | 0.0037052  | 520 | 520 |
| RSL1D1       | -0.137113114 | 0.001724707 | 0.00370204 | 520 | 520 |
| CISD2        | -0.137123383 | 0.001723315 | 0.00369945 | 520 | 520 |
| SYNGR2       | -0.137126725 | 0.001722862 | 0.00369887 | 520 | 520 |
| ATP6V1D      | -0.137263195 | 0.001704462 | 0.00366288 | 520 | 520 |
| PDZD3        | -0.137276781 | 0.00170264  | 0.00365935 | 520 | 297 |
| PRR5-ARHGAP8 | -0.137282685 | 0.001701849 | 0.00365804 | 520 | 500 |
| LRRRC8B      | -0.137311533 | 0.001697988 | 0.00365013 | 520 | 520 |
| ZNF330       | -0.137397058 | 0.001686589 | 0.00362717 | 520 | 520 |
| ASTE1        | -0.13741717  | 0.001683918 | 0.00362182 | 520 | 520 |
| EXOC3        | -0.137418275 | 0.001683772 | 0.00362182 | 520 | 520 |
| PRMT2        | -0.137485904 | 0.001674821 | 0.00360379 | 520 | 520 |
| SAPS2        | -0.137513901 | 0.001671129 | 0.00359623 | 520 | 520 |
| TBRG4        | -0.13753857  | 0.001667881 | 0.00358962 | 520 | 520 |
| U2AF1L4      | -0.137580699 | 0.001662349 | 0.0035781  | 520 | 520 |
| SERF2        | -0.137695691 | 0.001647334 | 0.00354663 | 520 | 520 |
| PSMC3        | -0.137839284 | 0.001628758 | 0.00351104 | 520 | 520 |
| ICAM4        | -0.137886333 | 0.001622714 | 0.00349839 | 520 | 520 |
| SLFNL1       | -0.137919373 | 0.001618482 | 0.00348964 | 520 | 518 |
| LSR          | -0.137970072 | 0.001612007 | 0.00347605 | 520 | 520 |
| SH2D3A       | -0.137971174 | 0.001611867 | 0.00347605 | 520 | 520 |
| CENPN        | -0.138025489 | 0.001604957 | 0.0034627  | 520 | 520 |
| PPHLN1       | -0.138094172 | 0.001596259 | 0.00344523 | 520 | 520 |
| GGA3         | -0.138096547 | 0.001595959 | 0.00344513 | 520 | 520 |
| LOC339674    | -0.138099128 | 0.001595633 | 0.00344479 | 520 | 475 |
| EMG1         | -0.138152968 | 0.001588847 | 0.00343088 | 520 | 520 |
| FIGNL1       | -0.138170628 | 0.001586627 | 0.00342645 | 520 | 520 |
| PPIE         | -0.138217704 | 0.001580723 | 0.00341443 | 520 | 520 |
| ZG16B        | -0.138237383 | 0.001578261 | 0.00340984 | 520 | 510 |
| TOMM40L      | -0.138243908 | 0.001577445 | 0.00340845 | 520 | 520 |
| STYXL1       | -0.138248958 | 0.001576814 | 0.00340781 | 520 | 520 |
| DGUOK        | -0.138272463 | 0.001573881 | 0.00340184 | 520 | 520 |
| SECTM1       | -0.138312857 | 0.001568851 | 0.00339206 | 520 | 520 |
| PRPF31       | -0.138361232 | 0.001562847 | 0.00337944 | 520 | 520 |
| ORC6L        | -0.138409631 | 0.001556861 | 0.00336721 | 520 | 520 |
| OR10H5       | -0.138424476 | 0.001555029 | 0.00336434 | 520 | 168 |

|              |              |             |            |     |     |
|--------------|--------------|-------------|------------|-----|-----|
| GNG5         | -0.13843112  | 0.00155421  | 0.00336292 | 520 | 520 |
| FGFBP3       | -0.13843459  | 0.001553782 | 0.00336272 | 520 | 519 |
| KRTAP3-2     | -0.138511696 | 0.001544306 | 0.00334329 | 520 | 154 |
| FAM81A       | -0.138539503 | 0.001540902 | 0.00333664 | 520 | 519 |
| GMEB2        | -0.138543765 | 0.001540381 | 0.00333586 | 520 | 520 |
| DIO1         | -0.138559054 | 0.001538512 | 0.00333218 | 520 | 413 |
| CDC37        | -0.13862603  | 0.001530353 | 0.00331557 | 520 | 520 |
| MRS2P2       | -0.138638943 | 0.001528784 | 0.00331253 | 520 | 512 |
| MINK1        | -0.138652221 | 0.001527173 | 0.00330975 | 520 | 520 |
| LOC100131726 | -0.138669706 | 0.001525053 | 0.00330587 | 520 | 514 |
| C16orf93     | -0.138704294 | 0.001520868 | 0.00329821 | 520 | 520 |
| MEMO1        | -0.13878025  | 0.001511715 | 0.00328013 | 520 | 520 |
| CCDC18       | -0.13878294  | 0.001511392 | 0.00327992 | 520 | 520 |
| PPEF2        | -0.138902878 | 0.001497045 | 0.00325004 | 520 | 147 |
| MRPS35       | -0.138952789 | 0.001491111 | 0.00323751 | 520 | 520 |
| PL-5283      | -0.138966397 | 0.001489497 | 0.0032347  | 520 | 520 |
| LACE1        | -0.138972936 | 0.001488722 | 0.00323372 | 520 | 520 |
| ARL17A       | -0.138987091 | 0.001487046 | 0.00323042 | 520 | 520 |
| GTF2IP1      | -0.139061151 | 0.001478303 | 0.00321316 | 520 | 520 |
| C19orf18     | -0.139089086 | 0.001475017 | 0.00320637 | 520 | 470 |
| HIST1H2AJ    | -0.139149811 | 0.001467899 | 0.00319192 | 520 | 452 |
| RACGAP1      | -0.139184296 | 0.00146387  | 0.00318351 | 520 | 520 |
| COMMD6       | -0.139201203 | 0.001461899 | 0.00318059 | 520 | 520 |
| DNAJC5       | -0.139208293 | 0.001461073 | 0.00317923 | 520 | 520 |
| LLPH         | -0.139255918 | 0.001455536 | 0.00316812 | 520 | 520 |
| ECM1         | -0.139275001 | 0.001453322 | 0.00316398 | 520 | 520 |
| PASK         | -0.139388577 | 0.001440213 | 0.00313646 | 520 | 520 |
| C2orf68      | -0.139461516 | 0.001431852 | 0.00311892 | 520 | 520 |
| FAM151A      | -0.139480986 | 0.001429628 | 0.00311441 | 520 | 450 |
| LOC80054     | -0.139487531 | 0.001428881 | 0.00311312 | 520 | 520 |
| PRPS2        | -0.139517909 | 0.001425418 | 0.00310625 | 520 | 520 |
| HERC2P2      | -0.139535116 | 0.001423461 | 0.00310232 | 520 | 520 |
| ITPA         | -0.139558693 | 0.001420782 | 0.00309715 | 520 | 520 |
| B3GNT3       | -0.139597407 | 0.001416394 | 0.00308792 | 520 | 520 |
| WFDC2        | -0.139643341 | 0.001411203 | 0.00307694 | 520 | 516 |
| IGFALS       | -0.139649416 | 0.001410518 | 0.00307577 | 520 | 450 |
| GGA1         | -0.139697297 | 0.001405128 | 0.00306435 | 520 | 520 |
| SH3BP2       | -0.139702319 | 0.001404564 | 0.00306345 | 520 | 520 |
| TBC1D10B     | -0.139777479 | 0.001396146 | 0.00304641 | 520 | 520 |
| RPL13        | -0.139796147 | 0.001394062 | 0.00304219 | 520 | 520 |
| 5-Mar        | -0.139801453 | 0.00139347  | 0.00304131 | 520 | 520 |
| CLK3         | -0.139811227 | 0.00139238  | 0.00303984 | 520 | 520 |
| DNAJA3       | -0.139818377 | 0.001391584 | 0.00303843 | 520 | 520 |
| MCM7         | -0.139899253 | 0.001382604 | 0.00302078 | 520 | 520 |
| TATDN3       | -0.139926863 | 0.00137955  | 0.00301477 | 520 | 520 |
| SLMO2        | -0.139926931 | 0.001379543 | 0.00301477 | 520 | 520 |

|           |              |             |            |     |     |
|-----------|--------------|-------------|------------|-----|-----|
| PLRG1     | -0.139969204 | 0.00137488  | 0.00300586 | 520 | 520 |
| PARD6A    | -0.139981429 | 0.001373534 | 0.00300325 | 520 | 520 |
| ITSN2     | -0.140002227 | 0.001371247 | 0.00299922 | 520 | 520 |
| AHSA2     | -0.140009339 | 0.001370466 | 0.00299784 | 520 | 520 |
| PIGR      | -0.140020322 | 0.00136926  | 0.00299585 | 520 | 508 |
| WDSUB1    | -0.140052872 | 0.001365693 | 0.00298837 | 520 | 520 |
| PEX7      | -0.140058058 | 0.001365126 | 0.00298745 | 520 | 520 |
| LOC339047 | -0.140164943 | 0.001353476 | 0.00296357 | 520 | 520 |
| SYCP3     | -0.140185435 | 0.001351253 | 0.00295966 | 520 | 251 |
| FBXL8     | -0.140186404 | 0.001351148 | 0.00295966 | 520 | 520 |
| SEPHS1    | -0.140192923 | 0.001350442 | 0.00295853 | 520 | 520 |
| MIP       | -0.140229317 | 0.001346505 | 0.00295055 | 520 | 431 |
| RTP4      | -0.140247813 | 0.001344508 | 0.00294649 | 520 | 520 |
| FAM83H    | -0.140249083 | 0.001344371 | 0.00294649 | 520 | 520 |
| LYPD6B    | -0.14035721  | 0.001332751 | 0.00292168 | 520 | 520 |
| SAMD12    | -0.140432007 | 0.001324768 | 0.00290513 | 520 | 519 |
| HEXIM1    | -0.140447374 | 0.001323133 | 0.00290217 | 520 | 520 |
| SLC25A21  | -0.140457908 | 0.001322014 | 0.00290003 | 520 | 498 |
| ADRB2     | -0.140466894 | 0.00132106  | 0.00289825 | 520 | 520 |
| VPS33B    | -0.140481169 | 0.001319545 | 0.00289525 | 520 | 520 |
| MYO19     | -0.140516461 | 0.001315807 | 0.00288736 | 520 | 520 |
| AGMAT     | -0.140557207 | 0.001311503 | 0.00287854 | 520 | 520 |
| PHB2      | -0.140617867 | 0.001305121 | 0.00286484 | 520 | 520 |
| ARHGEF19  | -0.140624032 | 0.001304474 | 0.00286374 | 520 | 520 |
| UBC       | -0.140632726 | 0.001303562 | 0.00286204 | 520 | 520 |
| MAPK8IP2  | -0.140717158 | 0.001294735 | 0.00284297 | 520 | 520 |
| CDH16     | -0.14072647  | 0.001293765 | 0.00284146 | 520 | 503 |
| BGLAP     | -0.140728259 | 0.001293578 | 0.00284136 | 520 | 520 |
| GAMT      | -0.140737842 | 0.001292581 | 0.00283948 | 520 | 520 |
| VPS26A    | -0.140739871 | 0.00129237  | 0.00283933 | 520 | 520 |
| UBTF      | -0.140771647 | 0.001289068 | 0.00283238 | 520 | 520 |
| DDX56     | -0.140869091 | 0.00127899  | 0.00281146 | 520 | 520 |
| MRPL36    | -0.140890312 | 0.001276805 | 0.00280758 | 520 | 520 |
| HES1      | -0.140892613 | 0.001276568 | 0.00280736 | 520 | 520 |
| HIST1H3B  | -0.140951543 | 0.001270519 | 0.00279528 | 520 | 454 |
| RAET1L    | -0.141033344 | 0.001262166 | 0.00277872 | 520 | 518 |
| RAB4B     | -0.141040766 | 0.001261411 | 0.00277736 | 520 | 520 |
| BCL7C     | -0.141049481 | 0.001260524 | 0.00277571 | 520 | 520 |
| C10orf111 | -0.141112722 | 0.001254109 | 0.00276249 | 520 | 503 |
| FCHSD1    | -0.141134153 | 0.001251942 | 0.00275802 | 520 | 520 |
| LOC256880 | -0.14114072  | 0.001251279 | 0.00275686 | 520 | 463 |
| COPS5     | -0.141228917 | 0.001242401 | 0.0027382  | 520 | 520 |
| CENPQ     | -0.141230366 | 0.001242255 | 0.00273818 | 520 | 520 |
| PRPF3     | -0.141283935 | 0.001236892 | 0.00272784 | 520 | 520 |
| FAM100A   | -0.141291875 | 0.001236099 | 0.00272639 | 520 | 520 |
| NPRL2     | -0.141295342 | 0.001235752 | 0.00272593 | 520 | 520 |

|           |              |             |            |     |     |
|-----------|--------------|-------------|------------|-----|-----|
| RWDD2B    | -0.141322351 | 0.001233059 | 0.00272028 | 520 | 520 |
| C9orf24   | -0.141330643 | 0.001232233 | 0.00271876 | 520 | 500 |
| DDTL      | -0.141365773 | 0.001228739 | 0.00271164 | 520 | 520 |
| COPS4     | -0.141372285 | 0.001228092 | 0.00271051 | 520 | 520 |
| AZI1      | -0.141391829 | 0.001226154 | 0.00270653 | 520 | 520 |
| LIN54     | -0.141421226 | 0.001223243 | 0.00270099 | 520 | 520 |
| SFI1      | -0.141533134 | 0.001212221 | 0.00267812 | 520 | 520 |
| SPHAR     | -0.141542069 | 0.001211344 | 0.00267677 | 520 | 520 |
| DHTKD1    | -0.141577292 | 0.001207896 | 0.00266945 | 520 | 520 |
| DEK       | -0.141583743 | 0.001207266 | 0.00266864 | 520 | 520 |
| LOC221442 | -0.141654992 | 0.001200322 | 0.00265358 | 520 | 516 |
| ATP5EP2   | -0.141661566 | 0.001199683 | 0.00265246 | 520 | 520 |
| SLFN13    | -0.141665523 | 0.001199299 | 0.0026519  | 520 | 520 |
| C14orf183 | -0.141718794 | 0.001194135 | 0.00264135 | 520 | 86  |
| MEF2B     | -0.141729317 | 0.001193118 | 0.00263939 | 520 | 520 |
| C15orf58  | -0.141742753 | 0.00119182  | 0.00263681 | 520 | 520 |
| NTS       | -0.141766362 | 0.001189542 | 0.00263234 | 520 | 468 |
| AGAP8     | -0.141774754 | 0.001188733 | 0.00263084 | 520 | 518 |
| HCG22     | -0.141860109 | 0.001180537 | 0.00261385 | 520 | 473 |
| SLC25A29  | -0.141888493 | 0.001177823 | 0.00260813 | 520 | 520 |
| MORN1     | -0.141902925 | 0.001176445 | 0.00260565 | 520 | 520 |
| CCBP2     | -0.141913577 | 0.001175429 | 0.00260369 | 520 | 519 |
| GNL3      | -0.141982289 | 0.001168895 | 0.00258978 | 520 | 520 |
| RPL19P12  | -0.142061278 | 0.001161425 | 0.00257408 | 520 | 520 |
| POLR3G    | -0.142071232 | 0.001160486 | 0.00257228 | 520 | 520 |
| MAPK3     | -0.142071715 | 0.001160441 | 0.00257228 | 520 | 520 |
| DKC1      | -0.142079622 | 0.001159696 | 0.00257138 | 520 | 520 |
| GM2A      | -0.142080793 | 0.001159586 | 0.00257138 | 520 | 520 |
| CLK2      | -0.142088306 | 0.001158879 | 0.00257013 | 520 | 520 |
| OR2A7     | -0.142108207 | 0.001157007 | 0.00256655 | 520 | 520 |
| LSS       | -0.142110179 | 0.001156822 | 0.00256642 | 520 | 520 |
| SLC15A1   | -0.142184991 | 0.001149813 | 0.00255199 | 520 | 508 |
| PLA2G4E   | -0.14230374  | 0.001138768 | 0.00252943 | 520 | 512 |
| RRP8      | -0.142326293 | 0.001136682 | 0.00252507 | 520 | 520 |
| LALBA     | -0.142423236 | 0.001127753 | 0.00250606 | 520 | 80  |
| NSUN4     | -0.1424737   | 0.00112313  | 0.00249634 | 520 | 520 |
| SDR9C7    | -0.142487894 | 0.001121834 | 0.00249401 | 520 | 511 |
| IMPDH2    | -0.142491711 | 0.001121485 | 0.00249351 | 520 | 520 |
| RPL28     | -0.142506406 | 0.001120144 | 0.0024908  | 520 | 520 |
| TYRO3     | -0.1425646   | 0.001114848 | 0.00247985 | 520 | 520 |
| MYO5C     | -0.142656192 | 0.00110656  | 0.00246195 | 520 | 520 |
| JUND      | -0.14267162  | 0.00110517  | 0.0024594  | 520 | 520 |
| C6orf129  | -0.142675268 | 0.001104841 | 0.00245894 | 520 | 520 |
| C7orf11   | -0.1426785   | 0.00110455  | 0.00245884 | 520 | 520 |
| MIOS      | -0.14269192  | 0.001103342 | 0.00245642 | 520 | 520 |
| C4orf6    | -0.14271647  | 0.001101137 | 0.00245178 | 520 | 346 |



|              |              |             |            |     |     |
|--------------|--------------|-------------|------------|-----|-----|
| ACAD11       | -0.142745977 | 0.001098491 | 0.00244643 | 520 | 520 |
| RUNDC1       | -0.142795951 | 0.001094023 | 0.00243675 | 520 | 520 |
| NPAS1        | -0.142810726 | 0.001092705 | 0.00243474 | 520 | 520 |
| KDM2B        | -0.142921455 | 0.001082876 | 0.00241405 | 520 | 520 |
| SNORA76      | -0.143003549 | 0.001075641 | 0.00239846 | 520 | 165 |
| TYMS         | -0.143025105 | 0.001073749 | 0.00239503 | 520 | 520 |
| CDC42BPG     | -0.143063194 | 0.001070413 | 0.00238812 | 520 | 520 |
| YDJC         | -0.143107194 | 0.001066571 | 0.00238034 | 520 | 520 |
| ZCCHC9       | -0.143115316 | 0.001065863 | 0.00237902 | 520 | 520 |
| FAM174A      | -0.143143156 | 0.001063441 | 0.00237414 | 520 | 520 |
| C16orf74     | -0.143144168 | 0.001063353 | 0.00237414 | 520 | 520 |
| C6orf153     | -0.143155506 | 0.001062367 | 0.00237227 | 520 | 520 |
| TFR2         | -0.143228315 | 0.001056061 | 0.00235897 | 520 | 520 |
| C11orf92     | -0.143240934 | 0.001054972 | 0.0023568  | 520 | 516 |
| GNAT1        | -0.143243003 | 0.001054793 | 0.00235666 | 520 | 276 |
| PMS2L5       | -0.143276677 | 0.001051891 | 0.00235091 | 520 | 520 |
| LOC100270746 | -0.14338263  | 0.001042809 | 0.00233195 | 520 | 520 |
| TOM1L1       | -0.143389877 | 0.001042191 | 0.00233108 | 520 | 520 |
| GTPBP4       | -0.143404206 | 0.001040968 | 0.00232861 | 520 | 520 |
| MCM5         | -0.143409686 | 0.001040502 | 0.00232782 | 520 | 520 |
| SLC12A6      | -0.14341483  | 0.001040063 | 0.0023271  | 520 | 520 |
| CCDC124      | -0.143481474 | 0.001034402 | 0.00231495 | 520 | 520 |
| ADRM1        | -0.143512707 | 0.001031758 | 0.00230954 | 520 | 520 |
| ZER1         | -0.14351821  | 0.001031293 | 0.00230901 | 520 | 520 |
| DEFB103B     | -0.143613165 | 0.001023297 | 0.00229162 | 520 | 478 |
| HIATL2       | -0.143613911 | 0.001023235 | 0.00229162 | 520 | 520 |
| ASH2L        | -0.14365878  | 0.001019477 | 0.00228357 | 520 | 520 |
| DCAF4L1      | -0.143726419 | 0.001013836 | 0.00227245 | 520 | 512 |
| PPWD1        | -0.143739276 | 0.001012767 | 0.00227031 | 520 | 520 |
| C3orf58      | -0.143803902 | 0.001007409 | 0.00225905 | 520 | 520 |
| C10orf67     | -0.143838675 | 0.001004537 | 0.00225336 | 520 | 501 |
| RHPN1        | -0.14386711  | 0.001002194 | 0.00224861 | 520 | 520 |
| CSTF1        | -0.143932356 | 0.000996838 | 0.00223734 | 520 | 520 |
| LIN9         | -0.143968225 | 0.000993904 | 0.0022315  | 520 | 520 |
| SIP1         | -0.144088154 | 0.000984153 | 0.00221034 | 520 | 520 |
| TAS1R3       | -0.144128708 | 0.000980876 | 0.00220347 | 520 | 519 |
| SCAND2       | -0.144135241 | 0.000980349 | 0.00220254 | 520 | 520 |
| AGAP6        | -0.144148024 | 0.000979319 | 0.00220047 | 520 | 520 |
| SEPSECS      | -0.144155668 | 0.000978703 | 0.00219933 | 520 | 520 |
| ANKRA2       | -0.144180925 | 0.000976671 | 0.00219525 | 520 | 520 |
| DUS3L        | -0.14430115  | 0.000967053 | 0.00217436 | 520 | 520 |
| HEPACAM2     | -0.144331233 | 0.00096466  | 0.00216922 | 520 | 303 |
| CDC20        | -0.144347754 | 0.000963348 | 0.00216651 | 520 | 520 |
| LOC100128675 | -0.144350807 | 0.000963106 | 0.00216621 | 520 | 210 |
| GPR37        | -0.144356004 | 0.000962694 | 0.00216552 | 520 | 518 |
| EPB41        | -0.144358993 | 0.000962457 | 0.00216523 | 520 | 520 |

|              |              |             |            |     |     |
|--------------|--------------|-------------|------------|-----|-----|
| SLC39A4      | -0.144392613 | 0.000959795 | 0.00215973 | 520 | 520 |
| CWC15        | -0.144461809 | 0.000954337 | 0.0021484  | 520 | 520 |
| WFDC12       | -0.144486422 | 0.000952402 | 0.00214429 | 520 | 490 |
| C1orf59      | -0.144491833 | 0.000951978 | 0.00214357 | 520 | 520 |
| BAT5         | -0.14466576  | 0.000938417 | 0.00211444 | 520 | 520 |
| SRP68        | -0.144740713 | 0.000932628 | 0.00210258 | 520 | 520 |
| PMS2         | -0.144796089 | 0.000928372 | 0.00209369 | 520 | 520 |
| PROZ         | -0.144809544 | 0.000927341 | 0.00209183 | 520 | 383 |
| DAP3         | -0.144811723 | 0.000927174 | 0.00209169 | 520 | 520 |
| SNX11        | -0.144823288 | 0.000926288 | 0.00209016 | 520 | 520 |
| GAK          | -0.144830186 | 0.00092576  | 0.0020892  | 520 | 520 |
| RPL30        | -0.144888247 | 0.000921329 | 0.0020799  | 520 | 520 |
| PEX3         | -0.144893677 | 0.000920916 | 0.0020792  | 520 | 520 |
| POU5F1       | -0.144909702 | 0.000919697 | 0.00207668 | 520 | 517 |
| NUDT7        | -0.144929124 | 0.000918221 | 0.00207358 | 520 | 520 |
| C10orf4      | -0.144948209 | 0.000916774 | 0.00207054 | 520 | 520 |
| ZNF274       | -0.144956401 | 0.000916153 | 0.00206937 | 520 | 520 |
| UFC1         | -0.144987049 | 0.000913834 | 0.0020646  | 520 | 520 |
| ALKBH7       | -0.145029732 | 0.000910613 | 0.00205824 | 520 | 520 |
| LOC100189589 | -0.145054097 | 0.000908779 | 0.00205433 | 520 | 179 |
| MED8         | -0.145054606 | 0.000908741 | 0.00205433 | 520 | 520 |
| C4orf33      | -0.145125587 | 0.000903418 | 0.0020429  | 520 | 520 |
| FAM166A      | -0.145139702 | 0.000902363 | 0.00204097 | 520 | 270 |
| HOXA5        | -0.145203484 | 0.00089761  | 0.0020309  | 520 | 509 |
| FGD3         | -0.145240777 | 0.000894842 | 0.00202532 | 520 | 520 |
| FLJ44606     | -0.145273877 | 0.000892392 | 0.00202023 | 520 | 518 |
| MACROD1      | -0.145276258 | 0.000892216 | 0.00202006 | 520 | 520 |
| HIST1H2AC    | -0.145310843 | 0.000889662 | 0.00201518 | 520 | 520 |
| CCDC53       | -0.145321008 | 0.000888913 | 0.00201371 | 520 | 520 |
| THAP7        | -0.14532324  | 0.000888749 | 0.00201357 | 520 | 520 |
| NMB          | -0.145430199 | 0.000880902 | 0.00199669 | 520 | 520 |
| FAM22G       | -0.145447335 | 0.000879651 | 0.00199407 | 520 | 508 |
| GEMIN6       | -0.145542261 | 0.00087275  | 0.00197888 | 520 | 520 |
| ZGLP1        | -0.145585646 | 0.000869613 | 0.00197243 | 520 | 519 |
| SUDS3        | -0.145594869 | 0.000868948 | 0.00197114 | 520 | 520 |
| C20orf114    | -0.145602348 | 0.000868408 | 0.00197014 | 520 | 370 |
| TK1          | -0.145607677 | 0.000868024 | 0.00196949 | 520 | 520 |
| SLC39A2      | -0.145691053 | 0.000862034 | 0.00195656 | 520 | 517 |
| TIMELESS     | -0.14569444  | 0.000861792 | 0.00195623 | 520 | 520 |
| C16orf53     | -0.145775575 | 0.000856001 | 0.00194374 | 520 | 520 |
| LCMT2        | -0.145839145 | 0.00085149  | 0.00193371 | 520 | 520 |
| FBF1         | -0.145887888 | 0.000848045 | 0.00192611 | 520 | 520 |
| PATE4        | -0.145898976 | 0.000847263 | 0.00192498 | 520 | 105 |
| POLR2L       | -0.146007668 | 0.000839635 | 0.00190851 | 520 | 520 |
| RPS3         | -0.146055196 | 0.00083632  | 0.00190119 | 520 | 520 |
| CCT6B        | -0.146081175 | 0.000834512 | 0.00189751 | 520 | 520 |

|           |              |             |            |     |     |
|-----------|--------------|-------------|------------|-----|-----|
| EFNA3     | -0.146093055 | 0.000833687 | 0.00189585 | 520 | 520 |
| FZD9      | -0.146122803 | 0.000831624 | 0.00189158 | 520 | 519 |
| PCSK9     | -0.146153736 | 0.000829484 | 0.00188693 | 520 | 520 |
| ZGPAT     | -0.146155639 | 0.000829353 | 0.00188684 | 520 | 520 |
| NCAN      | -0.146177735 | 0.000827827 | 0.00188358 | 520 | 387 |
| RBM38     | -0.146190303 | 0.000826961 | 0.00188182 | 520 | 520 |
| NENF      | -0.146206054 | 0.000825876 | 0.00187957 | 520 | 520 |
| GTPBP10   | -0.146238457 | 0.000823648 | 0.00187471 | 520 | 520 |
| CMAS      | -0.146291337 | 0.000820025 | 0.00186731 | 520 | 520 |
| MTMR7     | -0.146311644 | 0.000818638 | 0.00186436 | 520 | 520 |
| STATH     | -0.146434989 | 0.000810257 | 0.00184631 | 520 | 314 |
| RDM1      | -0.146472729 | 0.000807709 | 0.00184092 | 520 | 506 |
| SSBP3     | -0.14649099  | 0.000806478 | 0.00183833 | 520 | 520 |
| LOC650368 | -0.146524185 | 0.000804246 | 0.00183344 | 520 | 520 |
| TOMM70A   | -0.146599816 | 0.000799182 | 0.00182252 | 520 | 520 |
| MARK1     | -0.146602696 | 0.000798989 | 0.00182228 | 520 | 520 |
| TELO2     | -0.146612728 | 0.00079832  | 0.00182096 | 520 | 520 |
| C6orf163  | -0.146742381 | 0.000789715 | 0.00180195 | 520 | 515 |
| PDHB      | -0.146771958 | 0.000787764 | 0.00179771 | 520 | 520 |
| KLF16     | -0.146774027 | 0.000787628 | 0.00179771 | 520 | 520 |
| MEA1      | -0.146936195 | 0.000777012 | 0.00177457 | 520 | 520 |
| SEH1L     | -0.146981447 | 0.000774074 | 0.00176886 | 520 | 520 |
| SCARNA12  | -0.147015576 | 0.000771864 | 0.00176461 | 520 | 506 |
| CYP1A2    | -0.147027968 | 0.000771064 | 0.00176298 | 520 | 135 |
| CDCA7     | -0.147040769 | 0.000770237 | 0.00176149 | 520 | 520 |
| C16orf13  | -0.147069184 | 0.000768406 | 0.0017575  | 520 | 520 |
| FAM104A   | -0.147094041 | 0.000766807 | 0.00175404 | 520 | 520 |
| C7orf44   | -0.147111929 | 0.000765658 | 0.00175181 | 520 | 520 |
| KISS1R    | -0.147121978 | 0.000765014 | 0.00175054 | 520 | 438 |
| INADL     | -0.147328065 | 0.000751904 | 0.00172152 | 520 | 520 |
| IER3IP1   | -0.147331902 | 0.000751662 | 0.00172116 | 520 | 520 |
| TRIM66    | -0.147361569 | 0.000749793 | 0.00171707 | 520 | 520 |
| DCAF11    | -0.147573149 | 0.000736585 | 0.00168798 | 520 | 520 |
| ATP5E     | -0.147614264 | 0.000734044 | 0.00168253 | 520 | 520 |
| RABGGTB   | -0.147696194 | 0.000729004 | 0.00167204 | 520 | 520 |
| C20orf111 | -0.147706193 | 0.000728391 | 0.00167091 | 520 | 520 |
| C5orf30   | -0.147713984 | 0.000727914 | 0.00167019 | 520 | 520 |
| PTRH1     | -0.147742813 | 0.00072615  | 0.00166634 | 520 | 520 |
| TSSC4     | -0.147829577 | 0.000720867 | 0.00165478 | 520 | 520 |
| NXPH4     | -0.14783939  | 0.000720272 | 0.0016536  | 520 | 520 |
| WFIKKN1   | -0.147914044 | 0.000715758 | 0.00164361 | 520 | 514 |
| IL17RC    | -0.147915452 | 0.000715673 | 0.0016436  | 520 | 520 |
| HSPA9     | -0.147964506 | 0.000712721 | 0.0016372  | 520 | 520 |
| PSMD12    | -0.147980287 | 0.000711774 | 0.00163521 | 520 | 520 |
| THOC6     | -0.148035233 | 0.000708486 | 0.00162802 | 520 | 520 |
| THYN1     | -0.148117783 | 0.000703572 | 0.00161747 | 520 | 520 |

|              |              |             |            |     |     |
|--------------|--------------|-------------|------------|-----|-----|
| OR10H1       | -0.148149211 | 0.000701709 | 0.00161337 | 520 | 270 |
| C3orf19      | -0.148397492 | 0.000687155 | 0.00158166 | 520 | 520 |
| LGALS3       | -0.148421518 | 0.000685762 | 0.00157905 | 520 | 520 |
| HNRNPF       | -0.148465231 | 0.000683233 | 0.0015734  | 520 | 520 |
| SH3BP5L      | -0.148477445 | 0.000682528 | 0.00157214 | 520 | 520 |
| GKAP1        | -0.148505097 | 0.000680935 | 0.00156865 | 520 | 518 |
| SCGB1A1      | -0.148573592 | 0.000677002 | 0.00156046 | 520 | 348 |
| GEMIN8       | -0.148736579 | 0.000667729 | 0.00153963 | 520 | 520 |
| AKIRIN2      | -0.14875128  | 0.000666899 | 0.00153789 | 520 | 520 |
| MYBL2        | -0.148778351 | 0.000665372 | 0.0015347  | 520 | 520 |
| TP73         | -0.148840048 | 0.000661904 | 0.0015276  | 520 | 520 |
| NBR2         | -0.148843335 | 0.00066172  | 0.00152735 | 520 | 520 |
| ZNF770       | -0.148853971 | 0.000661124 | 0.00152632 | 520 | 520 |
| KRT73        | -0.148876344 | 0.000659872 | 0.00152361 | 520 | 321 |
| NSFL1C       | -0.148900376 | 0.000658529 | 0.00152068 | 520 | 520 |
| BPESC1       | -0.14890634  | 0.000658197 | 0.00152009 | 520 | 98  |
| CLDN3        | -0.148917514 | 0.000657574 | 0.001519   | 520 | 460 |
| PPIEL        | -0.148951678 | 0.000655672 | 0.00151495 | 520 | 518 |
| GSTK1        | -0.148982204 | 0.000653977 | 0.00151121 | 520 | 520 |
| KRT72        | -0.149074172 | 0.000648896 | 0.00149998 | 520 | 332 |
| DTNB         | -0.14909552  | 0.000647722 | 0.00149761 | 520 | 520 |
| UCKL1        | -0.149219619 | 0.000640935 | 0.0014826  | 520 | 520 |
| ELMOD3       | -0.149368045 | 0.000632904 | 0.00146453 | 520 | 520 |
| PDE4C        | -0.149406033 | 0.000630864 | 0.00146014 | 520 | 516 |
| FGF22        | -0.149421203 | 0.000630051 | 0.00145859 | 520 | 240 |
| SEPX1        | -0.149435953 | 0.000629261 | 0.00145715 | 520 | 520 |
| SLC29A2      | -0.149444174 | 0.000628822 | 0.00145642 | 520 | 520 |
| UNG          | -0.149482741 | 0.000626763 | 0.00145231 | 520 | 520 |
| PKP4         | -0.149512506 | 0.000625178 | 0.00144898 | 520 | 520 |
| SPIC         | -0.149567124 | 0.000622279 | 0.00144259 | 520 | 196 |
| TMEM116      | -0.149574677 | 0.00062188  | 0.00144183 | 520 | 520 |
| NUDT6        | -0.149594261 | 0.000620844 | 0.00143959 | 520 | 520 |
| MRPS17       | -0.14963434  | 0.00061873  | 0.00143518 | 520 | 520 |
| C6orf147     | -0.149642266 | 0.000618312 | 0.00143438 | 520 | 514 |
| ADCK1        | -0.1496488   | 0.000617968 | 0.00143375 | 520 | 520 |
| NMNAT1       | -0.149706629 | 0.000614933 | 0.00142687 | 520 | 520 |
| HSPD1        | -0.149825201 | 0.000608752 | 0.00141302 | 520 | 520 |
| TLE1         | -0.149879825 | 0.000605924 | 0.00140661 | 520 | 520 |
| ORC1L        | -0.149901657 | 0.000604797 | 0.00140448 | 520 | 520 |
| ASTN2        | -0.149932987 | 0.000603183 | 0.00140106 | 520 | 520 |
| GAST         | -0.149974678 | 0.000601042 | 0.00139657 | 520 | 490 |
| CROT         | -0.14999602  | 0.000599949 | 0.00139419 | 520 | 520 |
| UCHL5        | -0.150018147 | 0.000598817 | 0.00139172 | 520 | 520 |
| MIB2         | -0.15008766  | 0.000595275 | 0.00138412 | 520 | 520 |
| LOC100130274 | -0.150093152 | 0.000594996 | 0.00138364 | 520 | 154 |
| CUL3         | -0.150122932 | 0.000593485 | 0.00138028 | 520 | 520 |

|           |              |             |            |     |     |
|-----------|--------------|-------------|------------|-----|-----|
| PLUNC     | -0.150127468 | 0.000593255 | 0.00137991 | 520 | 209 |
| TMEM205   | -0.15012991  | 0.000593132 | 0.00137978 | 520 | 520 |
| ADIPOR1   | -0.150136343 | 0.000592806 | 0.00137918 | 520 | 520 |
| C2orf24   | -0.1501422   | 0.00059251  | 0.00137865 | 520 | 520 |
| ECSIT     | -0.150174292 | 0.000590888 | 0.00137519 | 520 | 520 |
| ATAD3C    | -0.1501981   | 0.000589687 | 0.00137256 | 520 | 520 |
| DPM1      | -0.150326429 | 0.000583256 | 0.00135837 | 520 | 520 |
| FBXO34    | -0.150383425 | 0.00058042  | 0.00135223 | 520 | 520 |
| C12orf27  | -0.150385561 | 0.000580314 | 0.00135214 | 520 | 177 |
| SFRS11    | -0.150488312 | 0.000575235 | 0.00134078 | 520 | 520 |
| RSPH6A    | -0.150502085 | 0.000574558 | 0.00133935 | 520 | 218 |
| EIF5A     | -0.150533093 | 0.000573035 | 0.00133596 | 520 | 520 |
| HIST1H4A  | -0.15053317  | 0.000573031 | 0.00133596 | 520 | 227 |
| C5orf45   | -0.150648783 | 0.000567386 | 0.00132386 | 520 | 520 |
| TRPV4     | -0.150689767 | 0.000565397 | 0.00131952 | 520 | 520 |
| C8orf45   | -0.150724539 | 0.000563715 | 0.0013159  | 520 | 519 |
| PRPF19    | -0.15075893  | 0.000562056 | 0.00131233 | 520 | 520 |
| EIF2S3    | -0.150762606 | 0.000561879 | 0.00131207 | 520 | 520 |
| CDHR4     | -0.150847403 | 0.000557809 | 0.00130302 | 520 | 415 |
| ERMP1     | -0.15085559  | 0.000557417 | 0.00130225 | 520 | 520 |
| YPEL3     | -0.150857341 | 0.000557333 | 0.00130221 | 520 | 520 |
| BNIP1     | -0.150975415 | 0.000551716 | 0.00128938 | 520 | 520 |
| PTPN13    | -0.151038155 | 0.000548752 | 0.00128275 | 520 | 520 |
| MLST8     | -0.151042871 | 0.00054853  | 0.00128238 | 520 | 520 |
| MCM2      | -0.151055179 | 0.00054795  | 0.00128118 | 520 | 520 |
| SPRR4     | -0.151125146 | 0.000544667 | 0.00127394 | 520 | 496 |
| C12orf26  | -0.151164439 | 0.000542832 | 0.00126994 | 520 | 520 |
| DNAJC11   | -0.15121409  | 0.00054052  | 0.00126468 | 520 | 520 |
| DSC2      | -0.151322273 | 0.000535515 | 0.00125327 | 520 | 520 |
| LOC349114 | -0.151345875 | 0.000534429 | 0.00125087 | 520 | 520 |
| ZNF33B    | -0.151417674 | 0.000531138 | 0.00124432 | 520 | 520 |
| C1orf49   | -0.151529361 | 0.000526055 | 0.00123313 | 520 | 236 |
| NFYB      | -0.15153266  | 0.000525906 | 0.00123292 | 520 | 520 |
| RANBP1    | -0.151536581 | 0.000525728 | 0.00123265 | 520 | 520 |
| LETM1     | -0.151559416 | 0.000524695 | 0.00123051 | 520 | 520 |
| MAD2L1    | -0.151583712 | 0.000523598 | 0.00122851 | 520 | 520 |
| FAM3A     | -0.151613682 | 0.000522248 | 0.00122563 | 520 | 520 |
| RGS9BP    | -0.151748599 | 0.000516209 | 0.0012123  | 520 | 508 |
| CACNG3    | -0.151825038 | 0.000512817 | 0.00120504 | 520 | 115 |
| IL17RB    | -0.151844808 | 0.000511943 | 0.00120341 | 520 | 520 |
| B3GALT4   | -0.15188993  | 0.000509953 | 0.00119901 | 520 | 520 |
| C10orf110 | -0.151896653 | 0.000509657 | 0.00119845 | 520 | 518 |
| TPMT      | -0.151907802 | 0.000509167 | 0.00119751 | 520 | 520 |
| LOC440957 | -0.151939949 | 0.000507756 | 0.00119454 | 520 | 520 |
| ORC5L     | -0.151940656 | 0.000507725 | 0.00119454 | 520 | 520 |
| FAM41C    | -0.151971708 | 0.000506365 | 0.00119168 | 520 | 520 |

|            |              |             |            |     |     |
|------------|--------------|-------------|------------|-----|-----|
| C1orf52    | -0.15199835  | 0.000505202 | 0.00118936 | 520 | 520 |
| HIST1H2BJ  | -0.152058182 | 0.000502597 | 0.00118365 | 520 | 520 |
| KIAA0907   | -0.152072281 | 0.000501985 | 0.00118234 | 520 | 520 |
| LHFPL4     | -0.152080384 | 0.000501634 | 0.00118165 | 520 | 317 |
| TMEM222    | -0.152186032 | 0.000497074 | 0.00117132 | 520 | 520 |
| LHX2       | -0.15220006  | 0.000496471 | 0.00117004 | 520 | 510 |
| SPDYC      | -0.152260988 | 0.000493862 | 0.0011643  | 520 | 293 |
| MRPL44     | -0.152308889 | 0.000491819 | 0.00115989 | 520 | 520 |
| ATP1A1     | -0.152350953 | 0.000490032 | 0.00115594 | 520 | 520 |
| PEX11B     | -0.15235683  | 0.000489783 | 0.00115549 | 520 | 520 |
| CNGA1      | -0.152369132 | 0.000489262 | 0.0011544  | 520 | 519 |
| C18orf21   | -0.152505713 | 0.000483509 | 0.00114149 | 520 | 520 |
| DDX11      | -0.152634519 | 0.000478141 | 0.00112948 | 520 | 520 |
| DENND1C    | -0.152647297 | 0.000477612 | 0.00112836 | 520 | 520 |
| LANCL3     | -0.1526572   | 0.000477202 | 0.00112766 | 520 | 519 |
| ACTR5      | -0.152709099 | 0.000475059 | 0.00112286 | 520 | 520 |
| GTPBP5     | -0.152737469 | 0.000473891 | 0.00112023 | 520 | 520 |
| SOX15      | -0.152747862 | 0.000473464 | 0.00111935 | 520 | 520 |
| PDCD6      | -0.152752985 | 0.000473253 | 0.00111905 | 520 | 520 |
| CPOX       | -0.152823198 | 0.000470378 | 0.00111284 | 520 | 520 |
| BCAP31     | -0.15293136  | 0.000465981 | 0.00110321 | 520 | 520 |
| NOBOX      | -0.152936337 | 0.00046578  | 0.00110286 | 520 | 111 |
| HNRNPA2B1  | -0.152990832 | 0.00046358  | 0.00109804 | 520 | 520 |
| OAZ3       | -0.153033114 | 0.00046188  | 0.00109431 | 520 | 520 |
| SLC13A2    | -0.15307423  | 0.000460232 | 0.00109075 | 520 | 356 |
| MNS1       | -0.153103371 | 0.000459067 | 0.00108825 | 520 | 519 |
| GUCY2GP    | -0.153127257 | 0.000458115 | 0.00108612 | 520 | 44  |
| TMEM52     | -0.153132787 | 0.000457895 | 0.00108572 | 520 | 520 |
| WNK2       | -0.153160972 | 0.000456774 | 0.00108319 | 520 | 515 |
| TAC3       | -0.153164218 | 0.000456645 | 0.00108301 | 520 | 259 |
| C9orf46    | -0.153176947 | 0.000456139 | 0.00108207 | 520 | 520 |
| CETN2      | -0.153192553 | 0.00045552  | 0.00108073 | 520 | 520 |
| GOLT1A     | -0.153237443 | 0.000453745 | 0.00107677 | 520 | 407 |
| CPT2       | -0.153259985 | 0.000452856 | 0.00107479 | 520 | 520 |
| UBXN1      | -0.153299936 | 0.000451283 | 0.00107131 | 520 | 520 |
| PTGER1     | -0.153308823 | 0.000450934 | 0.00107073 | 520 | 431 |
| RDH10      | -0.153353438 | 0.000449186 | 0.00106683 | 520 | 520 |
| APOL1      | -0.153391056 | 0.000447717 | 0.00106359 | 520 | 520 |
| LRRC46     | -0.153397696 | 0.000447458 | 0.00106323 | 520 | 519 |
| KCNIP2     | -0.153400348 | 0.000447355 | 0.00106311 | 520 | 519 |
| LRSAM1     | -0.153405769 | 0.000447143 | 0.00106273 | 520 | 520 |
| FAM108A1   | -0.153476308 | 0.000444404 | 0.00105672 | 520 | 520 |
| TICAM1     | -0.153502091 | 0.000443406 | 0.00105447 | 520 | 520 |
| LOC93622   | -0.153510018 | 0.0004431   | 0.00105387 | 520 | 520 |
| TNFAIP2    | -0.15353967  | 0.000441956 | 0.00105139 | 520 | 520 |
| NCRNA00188 | -0.153569379 | 0.000440813 | 0.00104892 | 520 | 520 |

|           |              |             |            |     |     |
|-----------|--------------|-------------|------------|-----|-----|
| AMT       | -0.153587787 | 0.000440106 | 0.00104736 | 520 | 520 |
| SUPT4H1   | -0.153608214 | 0.000439323 | 0.00104562 | 520 | 520 |
| TAF9      | -0.153711575 | 0.000435379 | 0.0010366  | 520 | 520 |
| CCNF      | -0.153730786 | 0.000434649 | 0.00103511 | 520 | 520 |
| SLC16A8   | -0.1537772   | 0.000432892 | 0.00103117 | 520 | 510 |
| GPR98     | -0.153838296 | 0.000430589 | 0.00102629 | 520 | 520 |
| SLC6A8    | -0.153847495 | 0.000430243 | 0.00102574 | 520 | 520 |
| KRT3      | -0.153849634 | 0.000430162 | 0.00102574 | 520 | 481 |
| PIGN      | -0.153853994 | 0.000429999 | 0.00102549 | 520 | 520 |
| VMA21     | -0.153870467 | 0.00042938  | 0.00102413 | 520 | 520 |
| OR5A1     | -0.153952442 | 0.000426316 | 0.00101707 | 520 | 8   |
| STAG3     | -0.153964842 | 0.000425854 | 0.00101608 | 520 | 519 |
| CXorf40A  | -0.154065541 | 0.000422121 | 0.00100789 | 520 | 520 |
| EPCAM     | -0.154088153 | 0.000421287 | 0.00100602 | 520 | 520 |
| SBF1P1    | -0.154138052 | 0.000419452 | 0.00100176 | 520 | 514 |
| ABC6      | -0.15416128  | 0.000418601 | 0.00099984 | 520 | 520 |
| MED30     | -0.154184884 | 0.000417737 | 0.00099801 | 520 | 520 |
| GNB2L1    | -0.154189074 | 0.000417584 | 0.00099777 | 520 | 520 |
| USP21     | -0.154200476 | 0.000417167 | 0.00099689 | 520 | 520 |
| PSMB8     | -0.154201955 | 0.000417113 | 0.00099688 | 520 | 520 |
| HAL       | -0.15421777  | 0.000416536 | 0.00099574 | 520 | 508 |
| CENPC1    | -0.154228754 | 0.000416136 | 0.0009949  | 520 | 520 |
| TRNP1     | -0.154357655 | 0.000411465 | 0.0009842  | 520 | 520 |
| GSTA2     | -0.154372283 | 0.000410938 | 0.00098329 | 520 | 255 |
| C4orf3    | -0.154428556 | 0.000408916 | 0.00097903 | 520 | 520 |
| DOM3Z     | -0.15444363  | 0.000408376 | 0.00097785 | 520 | 520 |
| C12orf74  | -0.154470941 | 0.0004074   | 0.00097575 | 520 | 348 |
| H1FX      | -0.154503207 | 0.000406249 | 0.00097311 | 520 | 520 |
| LOC729668 | -0.154507788 | 0.000406085 | 0.00097283 | 520 | 255 |
| A2LD1     | -0.154532042 | 0.000405223 | 0.00097099 | 520 | 520 |
| EPB41L1   | -0.154535032 | 0.000405116 | 0.00097085 | 520 | 520 |
| ARHGAP8   | -0.154582517 | 0.000403433 | 0.00096705 | 520 | 519 |
| ASPRV1    | -0.154584318 | 0.000403369 | 0.00096701 | 520 | 520 |
| TTF1      | -0.154624008 | 0.000401967 | 0.00096376 | 520 | 520 |
| GOLGA6L6  | -0.154630166 | 0.000401749 | 0.00096336 | 520 | 474 |
| TKT       | -0.154650977 | 0.000401016 | 0.00096183 | 520 | 520 |
| SET       | -0.154687982 | 0.000399716 | 0.00095894 | 520 | 520 |
| ATPBD4    | -0.154710874 | 0.000398913 | 0.00095724 | 520 | 520 |
| AADAC     | -0.154722444 | 0.000398508 | 0.00095661 | 520 | 477 |
| RG9MTD2   | -0.154743156 | 0.000397784 | 0.0009551  | 520 | 520 |
| PNPLA4    | -0.154760642 | 0.000397174 | 0.00095386 | 520 | 520 |
| FPGT      | -0.15477463  | 0.000396686 | 0.00095281 | 520 | 520 |
| MXI1      | -0.154781906 | 0.000396433 | 0.00095242 | 520 | 520 |
| LIPT1     | -0.154815357 | 0.00039527  | 0.00094974 | 520 | 520 |
| DLD       | -0.154855986 | 0.000393861 | 0.00094647 | 520 | 520 |
| ZNF75A    | -0.154862019 | 0.000393652 | 0.00094608 | 520 | 520 |

|           |              |             |            |     |     |
|-----------|--------------|-------------|------------|-----|-----|
| URM1      | -0.154898613 | 0.000392388 | 0.00094327 | 520 | 520 |
| HIST1H4D  | -0.154926674 | 0.000391422 | 0.00094105 | 520 | 433 |
| B9D2      | -0.154990602 | 0.000389228 | 0.00093611 | 520 | 520 |
| KLHL17    | -0.154991179 | 0.000389208 | 0.00093611 | 520 | 520 |
| BICD2     | -0.155011102 | 0.000388526 | 0.00093476 | 520 | 520 |
| SRP14     | -0.155055769 | 0.000387003 | 0.00093132 | 520 | 520 |
| TC2N      | -0.155062784 | 0.000386764 | 0.00093086 | 520 | 520 |
| NCOA7     | -0.15512476  | 0.000384661 | 0.0009259  | 520 | 520 |
| TMEM91    | -0.155126333 | 0.000384607 | 0.00092589 | 520 | 520 |
| WHSC2     | -0.155157942 | 0.000383539 | 0.00092342 | 520 | 520 |
| RPSAP9    | -0.155168469 | 0.000383183 | 0.00092268 | 520 | 520 |
| FOXD4L2   | -0.155228327 | 0.000381169 | 0.00091816 | 520 | 486 |
| CISD3     | -0.155285468 | 0.000379255 | 0.00091377 | 520 | 520 |
| RASIP1    | -0.155317342 | 0.000378192 | 0.00091131 | 520 | 520 |
| PALB2     | -0.155342653 | 0.000377349 | 0.00090939 | 520 | 520 |
| FAM18B2   | -0.155361289 | 0.00037673  | 0.00090805 | 520 | 520 |
| SSH3      | -0.155386158 | 0.000375905 | 0.00090634 | 520 | 520 |
| C7orf59   | -0.155404214 | 0.000375307 | 0.00090512 | 520 | 520 |
| UGT2B28   | -0.155415483 | 0.000374934 | 0.00090454 | 520 | 101 |
| LY6G5B    | -0.155511918 | 0.000371759 | 0.00089699 | 520 | 520 |
| ZFP62     | -0.155531868 | 0.000371105 | 0.00089552 | 520 | 520 |
| ZNF232    | -0.155550586 | 0.000370493 | 0.00089415 | 520 | 520 |
| CDC26     | -0.15555077  | 0.000370487 | 0.00089415 | 520 | 520 |
| MPND      | -0.155560744 | 0.000370161 | 0.00089356 | 520 | 520 |
| MTO1      | -0.155578821 | 0.000369571 | 0.00089224 | 520 | 520 |
| FLJ11235  | -0.155649272 | 0.00036728  | 0.00088722 | 520 | 515 |
| IDI2      | -0.155658187 | 0.000366991 | 0.00088665 | 520 | 520 |
| RAD23A    | -0.155724597 | 0.000364845 | 0.00088178 | 520 | 520 |
| ACBD6     | -0.155726143 | 0.000364795 | 0.00088177 | 520 | 520 |
| HIST2H2AC | -0.155753212 | 0.000363923 | 0.00087977 | 520 | 520 |
| UBE2A     | -0.155766574 | 0.000363494 | 0.00087884 | 520 | 520 |
| LYRM5     | -0.15577656  | 0.000363173 | 0.00087838 | 520 | 520 |
| ETAA1     | -0.155790185 | 0.000362736 | 0.00087743 | 520 | 520 |
| CYP4F8    | -0.155792657 | 0.000362657 | 0.00087734 | 520 | 216 |
| FMR1      | -0.155850368 | 0.000360812 | 0.00087308 | 520 | 520 |
| NDUFA4L2  | -0.155852126 | 0.000360756 | 0.00087305 | 520 | 520 |
| USE1      | -0.155876381 | 0.000359983 | 0.00087129 | 520 | 520 |
| COPZ1     | -0.155914293 | 0.000358779 | 0.00086879 | 520 | 520 |
| FAM192A   | -0.155914619 | 0.000358768 | 0.00086879 | 520 | 520 |
| NRL       | -0.156033946 | 0.000355001 | 0.00086026 | 520 | 520 |
| TPRG1L    | -0.156086944 | 0.00035334  | 0.00085634 | 520 | 520 |
| DECR1     | -0.156125603 | 0.000352132 | 0.00085362 | 520 | 520 |
| LOC150381 | -0.156127832 | 0.000352063 | 0.00085355 | 520 | 520 |
| C9orf123  | -0.156251543 | 0.000348226 | 0.00084466 | 520 | 520 |
| DDRK1     | -0.156257155 | 0.000348053 | 0.00084434 | 520 | 520 |
| PTPRH     | -0.156292849 | 0.000346954 | 0.00084178 | 520 | 520 |



|              |              |             |            |     |     |
|--------------|--------------|-------------|------------|-----|-----|
| GAD2         | -0.156312461 | 0.000346351 | 0.00084051 | 520 | 101 |
| C9orf53      | -0.156336033 | 0.000345628 | 0.00083886 | 520 | 298 |
| IL17RE       | -0.156353825 | 0.000345083 | 0.00083774 | 520 | 520 |
| C12orf47     | -0.156361551 | 0.000344847 | 0.00083727 | 520 | 520 |
| CHP          | -0.156371446 | 0.000344544 | 0.00083673 | 520 | 520 |
| RPL13AP20    | -0.156395058 | 0.000343824 | 0.00083508 | 520 | 520 |
| RBM42        | -0.156478737 | 0.000341281 | 0.00082941 | 520 | 520 |
| WBSCR26      | -0.156498418 | 0.000340686 | 0.00082806 | 520 | 475 |
| CLDN10       | -0.156519844 | 0.000340038 | 0.00082669 | 520 | 450 |
| METAP1       | -0.156520665 | 0.000340014 | 0.00082669 | 520 | 520 |
| S1PR5        | -0.156540273 | 0.000339422 | 0.00082539 | 520 | 520 |
| MARVELD3     | -0.156595364 | 0.000337766 | 0.00082176 | 520 | 520 |
| C16orf70     | -0.156596117 | 0.000337744 | 0.00082176 | 520 | 520 |
| RPSAP58      | -0.156599173 | 0.000337652 | 0.00082168 | 520 | 520 |
| C20orf199    | -0.156647852 | 0.000336196 | 0.00081843 | 520 | 520 |
| PPIP5K1      | -0.1566545   | 0.000335997 | 0.00081804 | 520 | 520 |
| NOL10        | -0.156660303 | 0.000335824 | 0.00081772 | 520 | 520 |
| GUCA2B       | -0.156689771 | 0.000334946 | 0.00081578 | 520 | 122 |
| SKA1         | -0.156744348 | 0.000333326 | 0.00081213 | 520 | 520 |
| ZNF497       | -0.156776556 | 0.000332373 | 0.0008102  | 520 | 520 |
| GARNL3       | -0.156778954 | 0.000332302 | 0.00081012 | 520 | 520 |
| RPS25        | -0.156799436 | 0.000331697 | 0.00080885 | 520 | 520 |
| GCLC         | -0.156862131 | 0.000329853 | 0.00080454 | 520 | 520 |
| NEK2         | -0.156865331 | 0.00032976  | 0.00080451 | 520 | 520 |
| DAPK2        | -0.156873279 | 0.000329527 | 0.00080404 | 520 | 520 |
| CYP4F3       | -0.156940404 | 0.000327565 | 0.00079945 | 520 | 513 |
| TFDP2        | -0.157021058 | 0.000325222 | 0.00079402 | 520 | 520 |
| GBAP1        | -0.157059303 | 0.000324116 | 0.00079151 | 520 | 520 |
| DKFZp761E198 | -0.15708006  | 0.000323518 | 0.00079014 | 520 | 520 |
| FBXL19       | -0.157084221 | 0.000323398 | 0.00078995 | 520 | 520 |
| C1orf213     | -0.157092927 | 0.000323147 | 0.00078952 | 520 | 520 |
| APEH         | -0.157117467 | 0.000322442 | 0.0007879  | 520 | 520 |
| GUK1         | -0.157121869 | 0.000322316 | 0.00078778 | 520 | 520 |
| EPPK1        | -0.157126509 | 0.000322182 | 0.00078755 | 520 | 520 |
| TOMM7        | -0.157184285 | 0.000320528 | 0.0007837  | 520 | 520 |
| HSPA4L       | -0.157215627 | 0.000319634 | 0.0007816  | 520 | 520 |
| TRIT1        | -0.157262684 | 0.000318297 | 0.00077862 | 520 | 520 |
| TMEM70       | -0.157296936 | 0.000317326 | 0.00077643 | 520 | 520 |
| ZCCHC8       | -0.157300643 | 0.000317221 | 0.00077627 | 520 | 520 |
| SLC25A26     | -0.157302281 | 0.000317175 | 0.00077625 | 520 | 520 |
| C16orf42     | -0.157333905 | 0.000316112 | 0.00077402 | 520 | 520 |
| FKBP2        | -0.157348979 | 0.000315857 | 0.00077359 | 520 | 520 |
| C10orf113    | -0.15737566  | 0.000315106 | 0.00077193 | 520 | 100 |
| ERH          | -0.157383645 | 0.000314881 | 0.00077148 | 520 | 520 |
| HIST1H1B     | -0.157387798 | 0.000314765 | 0.00077138 | 520 | 512 |
| FANCA        | -0.157389432 | 0.000314719 | 0.00077136 | 520 | 520 |

|           |              |             |            |     |     |
|-----------|--------------|-------------|------------|-----|-----|
| HINT3     | -0.15742361  | 0.000313761 | 0.00076911 | 520 | 520 |
| RPL13AP6  | -0.157427905 | 0.00031364  | 0.00076891 | 520 | 520 |
| LOC285629 | -0.157454743 | 0.00031289  | 0.00076735 | 520 | 512 |
| HIST1H3A  | -0.15747183  | 0.000312413 | 0.00076627 | 520 | 417 |
| PPP2R3B   | -0.157547794 | 0.000310302 | 0.00076128 | 520 | 520 |
| ATP6V0B   | -0.157562616 | 0.000309891 | 0.00076036 | 520 | 520 |
| ZRANB2    | -0.157568565 | 0.000309727 | 0.00076005 | 520 | 520 |
| PGLYRP4   | -0.157599034 | 0.000308885 | 0.00075817 | 520 | 516 |
| CENPK     | -0.157713408 | 0.000305744 | 0.0007511  | 520 | 520 |
| CWC27     | -0.157741079 | 0.000304989 | 0.00074936 | 520 | 520 |
| SH2B1     | -0.15781893  | 0.000302873 | 0.00074441 | 520 | 520 |
| CCBL1     | -0.157838169 | 0.000302353 | 0.00074322 | 520 | 520 |
| TOMM22    | -0.15785414  | 0.000301921 | 0.00074225 | 520 | 520 |
| RUVBL2    | -0.157894874 | 0.000300823 | 0.00073964 | 520 | 520 |
| DEPDC4    | -0.157928564 | 0.000299917 | 0.00073759 | 520 | 519 |
| NT5DC1    | -0.157938576 | 0.000299648 | 0.00073702 | 520 | 520 |
| SLC24A6   | -0.157993671 | 0.000298174 | 0.00073366 | 520 | 520 |
| FANCD2    | -0.158094398 | 0.000295496 | 0.00072716 | 520 | 520 |
| NAPB      | -0.158164911 | 0.000293635 | 0.00072276 | 520 | 520 |
| RALGAPA1  | -0.158176646 | 0.000293326 | 0.00072209 | 520 | 520 |
| YIPF1     | -0.15819045  | 0.000292964 | 0.00072137 | 520 | 520 |
| ZDHHC21   | -0.15824656  | 0.000291494 | 0.00071784 | 520 | 520 |
| NFE2L2    | -0.158334815 | 0.000289196 | 0.00071253 | 520 | 520 |
| VARS2     | -0.158453065 | 0.000286143 | 0.00070527 | 520 | 520 |
| NFKBIL2   | -0.158465563 | 0.000285822 | 0.00070473 | 520 | 520 |
| ACAT2     | -0.158509427 | 0.000284698 | 0.00070213 | 520 | 520 |
| TMEM14B   | -0.158536003 | 0.000284019 | 0.00070063 | 520 | 520 |
| C19orf70  | -0.15856461  | 0.000283291 | 0.00069901 | 520 | 520 |
| UCKL1AS   | -0.158585456 | 0.000282761 | 0.00069778 | 520 | 520 |
| PFN3      | -0.158589067 | 0.000282669 | 0.00069764 | 520 | 86  |
| ACP6      | -0.158612696 | 0.000282069 | 0.00069633 | 520 | 520 |
| RAN       | -0.158724943 | 0.000279238 | 0.00068976 | 520 | 520 |
| BLK       | -0.158744735 | 0.000278741 | 0.00068871 | 520 | 488 |
| RELL2     | -0.158746864 | 0.000278688 | 0.00068866 | 520 | 520 |
| NKX2-4    | -0.158902939 | 0.000274801 | 0.00067939 | 520 | 102 |
| TMPO      | -0.158913022 | 0.000274552 | 0.00067886 | 520 | 520 |
| PKLR      | -0.159020182 | 0.000271916 | 0.0006725  | 520 | 414 |
| RPL23P8   | -0.159023979 | 0.000271823 | 0.00067235 | 520 | 520 |
| HDAC11    | -0.159055291 | 0.000271057 | 0.00067054 | 520 | 520 |
| SLC16A11  | -0.159096363 | 0.000270056 | 0.00066823 | 520 | 518 |
| GIPC2     | -0.159159472 | 0.000268524 | 0.00066468 | 520 | 517 |
| RNF126P1  | -0.159162113 | 0.00026846  | 0.00066461 | 520 | 509 |
| EED       | -0.159255111 | 0.000266218 | 0.00065938 | 520 | 520 |
| ZDHHC18   | -0.159267918 | 0.00026591  | 0.0006587  | 520 | 520 |
| RRM2      | -0.15930658  | 0.000264985 | 0.00065657 | 520 | 520 |
| RPS5      | -0.159317522 | 0.000264723 | 0.00065608 | 520 | 520 |

|               |              |             |            |     |     |
|---------------|--------------|-------------|------------|-----|-----|
| DYNLRB1       | -0.159373254 | 0.000263395 | 0.00065294 | 520 | 520 |
| DKFZP586I1420 | -0.159376641 | 0.000263314 | 0.00065283 | 520 | 520 |
| TRMT2A        | -0.159392445 | 0.000262939 | 0.00065206 | 520 | 520 |
| C19orf23      | -0.159443267 | 0.000261735 | 0.00064915 | 520 | 519 |
| SEMA4D        | -0.159489496 | 0.000260645 | 0.00064669 | 520 | 520 |
| FOXE3         | -0.159490675 | 0.000260617 | 0.00064669 | 520 | 412 |
| PIN1          | -0.159518913 | 0.000259953 | 0.00064513 | 520 | 520 |
| UPK1B         | -0.159594087 | 0.000258193 | 0.000641   | 520 | 496 |
| COBRA1        | -0.15964606  | 0.000256983 | 0.00063823 | 520 | 520 |
| SLCO6A1       | -0.15966506  | 0.000256542 | 0.00063721 | 520 | 383 |
| KRT27         | -0.159720473 | 0.000255259 | 0.00063419 | 520 | 312 |
| YJEFN3        | -0.159748907 | 0.000254604 | 0.00063279 | 520 | 513 |
| ZNF688        | -0.159876598 | 0.000251679 | 0.00062575 | 520 | 520 |
| KRT2          | -0.159884796 | 0.000251492 | 0.00062536 | 520 | 470 |
| CPT1B         | -0.159910469 | 0.000250908 | 0.00062407 | 520 | 520 |
| LETMD1        | -0.159965606 | 0.000249658 | 0.00062111 | 520 | 520 |
| ZCWPW1        | -0.159997157 | 0.000248946 | 0.00061949 | 520 | 520 |
| MGC16275      | -0.160003257 | 0.000248808 | 0.00061923 | 520 | 520 |
| PRPSAP1       | -0.160034296 | 0.000248109 | 0.00061756 | 520 | 520 |
| FAM182A       | -0.160117264 | 0.00024625  | 0.00061324 | 520 | 348 |
| C1orf106      | -0.160228156 | 0.000243786 | 0.0006074  | 520 | 520 |
| FABP5L3       | -0.160260222 | 0.000243078 | 0.00060594 | 520 | 475 |
| SST           | -0.16033003  | 0.000241543 | 0.00060226 | 520 | 294 |
| AMY1A         | -0.160351257 | 0.000241078 | 0.00060117 | 520 | 444 |
| TSSK3         | -0.160413259 | 0.000239725 | 0.0005981  | 520 | 518 |
| C1orf226      | -0.160422543 | 0.000239523 | 0.00059767 | 520 | 520 |
| CAMSAP1       | -0.160448564 | 0.000238957 | 0.00059646 | 520 | 520 |
| CLK1          | -0.160493269 | 0.000237989 | 0.00059413 | 520 | 520 |
| HSH2D         | -0.160523899 | 0.000237327 | 0.00059263 | 520 | 520 |
| PLEKHA7       | -0.160615029 | 0.000235369 | 0.0005881  | 520 | 520 |
| SEC1          | -0.160660125 | 0.000234406 | 0.00058584 | 520 | 512 |
| NUDT19        | -0.160683977 | 0.000233898 | 0.00058472 | 520 | 520 |
| C7orf30       | -0.16069948  | 0.000233568 | 0.00058404 | 520 | 520 |
| ANKRD34B      | -0.160779633 | 0.000231871 | 0.00057994 | 520 | 369 |
| ALG1L2        | -0.16078519  | 0.000231754 | 0.00057972 | 520 | 331 |
| SKA2          | -0.160785421 | 0.000231749 | 0.00057972 | 520 | 520 |
| CCDC78        | -0.16080715  | 0.000231291 | 0.0005787  | 520 | 517 |
| MKKS          | -0.160861971 | 0.00023014  | 0.00057603 | 520 | 520 |
| ACADVL        | -0.160966631 | 0.000227956 | 0.00057071 | 520 | 520 |
| PYGO2         | -0.16097271  | 0.00022783  | 0.00057047 | 520 | 520 |
| RPP30         | -0.160992195 | 0.000227426 | 0.00056952 | 520 | 520 |
| CCDC88C       | -0.160994304 | 0.000227382 | 0.00056949 | 520 | 520 |
| EDARADD       | -0.161009789 | 0.000227061 | 0.00056886 | 520 | 520 |
| ISG20         | -0.161034279 | 0.000226555 | 0.0005677  | 520 | 520 |
| SIRT6         | -0.161090231 | 0.000225402 | 0.00056488 | 520 | 520 |
| KIAA1671      | -0.161136098 | 0.000224462 | 0.00056259 | 520 | 520 |

|          |              |             |            |     |     |
|----------|--------------|-------------|------------|-----|-----|
| RNF135   | -0.161140677 | 0.000224368 | 0.00056243 | 520 | 520 |
| NOC2L    | -0.161179086 | 0.000223583 | 0.00056067 | 520 | 520 |
| LGALS9C  | -0.161253128 | 0.000222078 | 0.00055696 | 520 | 519 |
| RBM4     | -0.161258226 | 0.000221974 | 0.00055677 | 520 | 520 |
| STK11    | -0.161293303 | 0.000221265 | 0.00055506 | 520 | 520 |
| ALKBH4   | -0.161294771 | 0.000221235 | 0.00055506 | 520 | 520 |
| C3orf35  | -0.161336856 | 0.000220387 | 0.000553   | 520 | 500 |
| KIF11    | -0.161344252 | 0.000220238 | 0.00055276 | 520 | 520 |
| C9orf152 | -0.161410531 | 0.000218909 | 0.00054956 | 520 | 457 |
| MAST1    | -0.161470041 | 0.000217722 | 0.00054679 | 520 | 520 |
| WDR87    | -0.161487208 | 0.000217381 | 0.000546   | 520 | 211 |
| ERN2     | -0.161492034 | 0.000217285 | 0.00054582 | 520 | 417 |
| TBC1D22B | -0.161516872 | 0.000216792 | 0.00054472 | 520 | 520 |
| C2orf55  | -0.16151913  | 0.000216747 | 0.00054468 | 520 | 520 |
| NUDT14   | -0.161597554 | 0.000215199 | 0.00054099 | 520 | 520 |
| KIR2DL4  | -0.161658244 | 0.000214007 | 0.00053813 | 520 | 497 |
| RNF187   | -0.161667277 | 0.000213831 | 0.00053782 | 520 | 520 |
| ABCF3    | -0.161698208 | 0.000213226 | 0.00053643 | 520 | 520 |
| POLE3    | -0.161700084 | 0.00021319  | 0.00053641 | 520 | 520 |
| FANCC    | -0.161703326 | 0.000213127 | 0.00053631 | 520 | 520 |
| MST1P9   | -0.161706679 | 0.000213061 | 0.00053622 | 520 | 514 |
| HMOX2    | -0.16171788  | 0.000212843 | 0.00053573 | 520 | 520 |
| METTL9   | -0.161735539 | 0.000212499 | 0.00053494 | 520 | 520 |
| HAUS3    | -0.161763866 | 0.000211949 | 0.00053368 | 520 | 520 |
| IKZF2    | -0.161797955 | 0.000211289 | 0.00053229 | 520 | 520 |
| PARP2    | -0.161822091 | 0.000210822 | 0.00053124 | 520 | 520 |
| INO80B   | -0.161827149 | 0.000210725 | 0.00053106 | 520 | 520 |
| KIFC2    | -0.161827433 | 0.000210719 | 0.00053106 | 520 | 520 |
| RASA4P   | -0.161872123 | 0.000209858 | 0.00052921 | 520 | 520 |
| STRADA   | -0.161875421 | 0.000209795 | 0.00052912 | 520 | 520 |
| ZFAND6   | -0.161887356 | 0.000209566 | 0.00052861 | 520 | 520 |
| SYT2     | -0.161892814 | 0.000209461 | 0.00052841 | 520 | 514 |
| TRAF4    | -0.16193533  | 0.000208647 | 0.00052642 | 520 | 520 |
| CLPP     | -0.161947277 | 0.000208418 | 0.00052591 | 520 | 520 |
| NCAPH2   | -0.161951501 | 0.000208338 | 0.00052577 | 520 | 520 |
| RACGAP1P | -0.161952602 | 0.000208317 | 0.00052577 | 520 | 515 |
| NUDT22   | -0.162064651 | 0.000206188 | 0.0005208  | 520 | 520 |
| GJB4     | -0.162082069 | 0.000205859 | 0.00052004 | 520 | 518 |
| DBF4     | -0.162104393 | 0.000205438 | 0.0005191  | 520 | 520 |
| RPL15    | -0.162108923 | 0.000205353 | 0.00051895 | 520 | 520 |
| LPIN3    | -0.162109161 | 0.000205348 | 0.00051895 | 520 | 520 |
| RNF32    | -0.162160212 | 0.000204389 | 0.00051665 | 520 | 520 |
| FZD5     | -0.162187538 | 0.000203877 | 0.00051555 | 520 | 520 |
| TTC13    | -0.162192153 | 0.00020379  | 0.00051539 | 520 | 520 |
| PD XK    | -0.162207805 | 0.000203498 | 0.00051485 | 520 | 520 |
| CHMP4B   | -0.1622351   | 0.000202989 | 0.00051375 | 520 | 520 |

|           |              |             |            |     |     |
|-----------|--------------|-------------|------------|-----|-----|
| DUSP28    | -0.16224551  | 0.000202795 | 0.00051333 | 520 | 520 |
| MST1R     | -0.162384736 | 0.000200219 | 0.00050693 | 520 | 520 |
| RWDD1     | -0.16240904  | 0.000199772 | 0.00050587 | 520 | 520 |
| MTCH2     | -0.162457055 | 0.000198893 | 0.00050376 | 520 | 520 |
| DYDC2     | -0.162592099 | 0.000196438 | 0.00049805 | 520 | 376 |
| TCP11     | -0.162595072 | 0.000196385 | 0.00049798 | 520 | 422 |
| PPIL3     | -0.162618659 | 0.000195959 | 0.00049696 | 520 | 520 |
| BRD7      | -0.162657067 | 0.000195268 | 0.00049545 | 520 | 520 |
| PLEKHM1   | -0.16265949  | 0.000195224 | 0.00049541 | 520 | 520 |
| LOC91316  | -0.16270325  | 0.00019444  | 0.0004936  | 520 | 520 |
| TRPM4     | -0.162763793 | 0.000193359 | 0.00049092 | 520 | 520 |
| ZNF839    | -0.162804042 | 0.000192644 | 0.00048917 | 520 | 520 |
| EFNA4     | -0.1628854   | 0.000191205 | 0.00048564 | 520 | 520 |
| C1orf112  | -0.162986693 | 0.000189429 | 0.00048118 | 520 | 520 |
| C6orf70   | -0.163080383 | 0.000187799 | 0.00047729 | 520 | 520 |
| SYNGR3    | -0.163098812 | 0.00018748  | 0.00047659 | 520 | 519 |
| GOT2      | -0.163107937 | 0.000187322 | 0.00047625 | 520 | 520 |
| PTPN3     | -0.163136743 | 0.000186825 | 0.00047505 | 520 | 520 |
| ZNF33A    | -0.163139209 | 0.000186783 | 0.000475   | 520 | 520 |
| TEPP      | -0.163159121 | 0.00018644  | 0.00047425 | 520 | 424 |
| SERPINB10 | -0.163175898 | 0.000186151 | 0.00047358 | 520 | 426 |
| KCTD6     | -0.163242408 | 0.000185012 | 0.00047074 | 520 | 520 |
| BCR       | -0.163250212 | 0.000184879 | 0.00047052 | 520 | 520 |
| SECISBP2  | -0.163255472 | 0.000184789 | 0.00047035 | 520 | 520 |
| CYP4F2    | -0.163278614 | 0.000184394 | 0.0004694  | 520 | 397 |
| GLTSCR2   | -0.163285326 | 0.00018428  | 0.00046917 | 520 | 520 |
| IFRD2     | -0.163296499 | 0.00018409  | 0.00046875 | 520 | 520 |
| PTCD3     | -0.163306223 | 0.000183925 | 0.00046838 | 520 | 520 |
| RPL22L1   | -0.16331057  | 0.000183851 | 0.00046825 | 520 | 520 |
| NOP56     | -0.163453143 | 0.000181445 | 0.0004623  | 520 | 520 |
| HARS      | -0.163497426 | 0.000180704 | 0.00046059 | 520 | 520 |
| SUZ12P    | -0.163508028 | 0.000180527 | 0.00046019 | 520 | 520 |
| SPATA24   | -0.163591094 | 0.000179145 | 0.00045696 | 520 | 520 |
| SGEF      | -0.163677724 | 0.000177715 | 0.00045348 | 520 | 518 |
| C11orf1   | -0.163722652 | 0.000176977 | 0.00045172 | 520 | 520 |
| MECR      | -0.163777816 | 0.000176075 | 0.00044959 | 520 | 520 |
| RAB3IP    | -0.163778109 | 0.00017607  | 0.00044959 | 520 | 520 |
| WDR16     | -0.163814825 | 0.000175473 | 0.00044827 | 520 | 478 |
| COG4      | -0.163839599 | 0.00017507  | 0.00044736 | 520 | 520 |
| FLJ40330  | -0.163841078 | 0.000175046 | 0.00044736 | 520 | 510 |
| FAM200B   | -0.163893287 | 0.000174202 | 0.00044531 | 520 | 520 |
| SLCO4A1   | -0.163910492 | 0.000173924 | 0.00044471 | 520 | 520 |
| MUTYH     | -0.163928599 | 0.000173633 | 0.00044408 | 520 | 520 |
| LPCAT4    | -0.163943964 | 0.000173385 | 0.0004435  | 520 | 520 |
| TMEM97    | -0.163954888 | 0.00017321  | 0.00044311 | 520 | 520 |
| IRX5      | -0.164001043 | 0.00017247  | 0.00044133 | 520 | 520 |

|            |              |             |            |     |     |
|------------|--------------|-------------|------------|-----|-----|
| S100A3     | -0.164036425 | 0.000171905 | 0.00044    | 520 | 520 |
| MUC16      | -0.164038766 | 0.000171868 | 0.00043996 | 520 | 513 |
| UBE2N      | -0.164063174 | 0.000171479 | 0.00043913 | 520 | 520 |
| RPIA       | -0.164071532 | 0.000171346 | 0.00043896 | 520 | 520 |
| ZFYVE21    | -0.164112254 | 0.0001707   | 0.00043736 | 520 | 520 |
| SLC25A19   | -0.16415253  | 0.000170063 | 0.00043584 | 520 | 520 |
| MRPL45     | -0.164180615 | 0.000169621 | 0.00043476 | 520 | 520 |
| TMEM177    | -0.164212617 | 0.000169117 | 0.00043352 | 520 | 520 |
| PEX11G     | -0.164272693 | 0.000168177 | 0.00043116 | 520 | 520 |
| GGH        | -0.16427682  | 0.000168112 | 0.00043105 | 520 | 520 |
| MUC13      | -0.164376245 | 0.000166566 | 0.00042731 | 520 | 443 |
| NCAPG      | -0.164397422 | 0.000166239 | 0.00042658 | 520 | 520 |
| AFTPH      | -0.164419976 | 0.000165891 | 0.00042574 | 520 | 520 |
| RNF181     | -0.164440954 | 0.000165567 | 0.00042502 | 520 | 520 |
| GPLD1      | -0.164461829 | 0.000165246 | 0.00042425 | 520 | 493 |
| CDH1       | -0.164478556 | 0.00016499  | 0.00042375 | 520 | 520 |
| RAB5B      | -0.164495527 | 0.000164729 | 0.00042313 | 520 | 520 |
| MTIF2      | -0.164540389 | 0.000164044 | 0.00042143 | 520 | 520 |
| KIAA1598   | -0.164585383 | 0.000163358 | 0.00041977 | 520 | 520 |
| LSM1       | -0.164601688 | 0.000163111 | 0.00041924 | 520 | 520 |
| FBRS       | -0.16462339  | 0.000162782 | 0.00041851 | 520 | 520 |
| NCRNA00114 | -0.164625207 | 0.000162754 | 0.00041851 | 520 | 130 |
| BCS1L      | -0.164657819 | 0.000162261 | 0.00041754 | 520 | 520 |
| C7orf55    | -0.164662016 | 0.000162197 | 0.00041743 | 520 | 520 |
| CSNK1A1    | -0.164741685 | 0.000160999 | 0.0004145  | 520 | 520 |
| TXNDC9     | -0.164764246 | 0.000160661 | 0.00041368 | 520 | 520 |
| DENR       | -0.164785045 | 0.00016035  | 0.00041299 | 520 | 520 |
| TIMM9      | -0.164819233 | 0.00015984  | 0.00041173 | 520 | 520 |
| MSLN       | -0.164908161 | 0.000158521 | 0.00040859 | 520 | 517 |
| DHPS       | -0.164997388 | 0.000157207 | 0.00040541 | 520 | 520 |
| NUDT18     | -0.165046536 | 0.000156488 | 0.00040366 | 520 | 520 |
| TUBBP5     | -0.165095154 | 0.00015578  | 0.00040195 | 520 | 501 |
| SGSM3      | -0.165133922 | 0.000155217 | 0.00040064 | 520 | 520 |
| RASGRP1    | -0.165136189 | 0.000155185 | 0.00040061 | 520 | 520 |
| EIF3M      | -0.16520581  | 0.000154179 | 0.00039811 | 520 | 520 |
| MST1       | -0.165206416 | 0.00015417  | 0.00039811 | 520 | 520 |
| BOLA1      | -0.165235428 | 0.000153753 | 0.00039712 | 520 | 520 |
| HSD17B4    | -0.165235847 | 0.000153747 | 0.00039712 | 520 | 520 |
| GRHPR      | -0.165261258 | 0.000153383 | 0.00039626 | 520 | 520 |
| TXNL4B     | -0.165345456 | 0.000152181 | 0.00039326 | 520 | 520 |
| C12orf44   | -0.165461942 | 0.000150533 | 0.0003891  | 520 | 520 |
| C19orf24   | -0.165507039 | 0.000149899 | 0.00038751 | 520 | 520 |
| MRS2       | -0.165511713 | 0.000149834 | 0.00038739 | 520 | 520 |
| NDUFC2     | -0.165529276 | 0.000149588 | 0.0003868  | 520 | 520 |
| MPPE1      | -0.165543892 | 0.000149383 | 0.00038637 | 520 | 520 |
| PGAP3      | -0.165688387 | 0.000147377 | 0.00038143 | 520 | 520 |

|           |              |             |            |     |     |
|-----------|--------------|-------------|------------|-----|-----|
| OBFC2B    | -0.165705408 | 0.000147142 | 0.00038087 | 520 | 520 |
| ACY3      | -0.165718751 | 0.000146958 | 0.00038044 | 520 | 516 |
| NHP2L1    | -0.165725116 | 0.000146871 | 0.00038026 | 520 | 520 |
| CSTF2     | -0.165756134 | 0.000146445 | 0.00037931 | 520 | 520 |
| PPAPDC2   | -0.165955001 | 0.00014374  | 0.00037259 | 520 | 520 |
| ELOF1     | -0.166008296 | 0.000143024 | 0.00037088 | 520 | 520 |
| FAM96A    | -0.166038084 | 0.000142624 | 0.00036989 | 520 | 520 |
| MSGN1     | -0.166050982 | 0.000142452 | 0.00036949 | 520 | 266 |
| TMEM14A   | -0.166104521 | 0.000141738 | 0.00036768 | 520 | 520 |
| NME2      | -0.166157653 | 0.000141033 | 0.0003659  | 520 | 520 |
| ARFGAP2   | -0.166162638 | 0.000140967 | 0.00036578 | 520 | 520 |
| ABCA5     | -0.16617938  | 0.000140745 | 0.00036525 | 520 | 520 |
| IL17A     | -0.16620696  | 0.000140381 | 0.0003644  | 520 | 351 |
| NSA2      | -0.16620868  | 0.000140359 | 0.00036439 | 520 | 520 |
| MAD2L1BP  | -0.166250516 | 0.000139808 | 0.00036305 | 520 | 520 |
| NDRG2     | -0.166287241 | 0.000139327 | 0.00036185 | 520 | 520 |
| CXorf26   | -0.166340602 | 0.00013863  | 0.00036018 | 520 | 520 |
| POU4F1    | -0.166342242 | 0.000138608 | 0.00036017 | 520 | 398 |
| LGALS7B   | -0.166375562 | 0.000138175 | 0.00035913 | 520 | 518 |
| PRKX      | -0.166379163 | 0.000138128 | 0.00035906 | 520 | 520 |
| TTC15     | -0.166433437 | 0.000137425 | 0.00035728 | 520 | 520 |
| C6orf41   | -0.166460824 | 0.000137072 | 0.00035645 | 520 | 511 |
| ZNF534    | -0.166471051 | 0.00013694  | 0.00035615 | 520 | 518 |
| TEX10     | -0.166482806 | 0.000136788 | 0.00035581 | 520 | 520 |
| CEPT1     | -0.166526522 | 0.000136227 | 0.00035444 | 520 | 520 |
| GYS2      | -0.166537517 | 0.000136086 | 0.00035412 | 520 | 332 |
| CCDC11    | -0.166543568 | 0.000136009 | 0.00035396 | 520 | 519 |
| KRTAP5-5  | -0.166546073 | 0.000135977 | 0.00035392 | 520 | 94  |
| CDC45     | -0.166583795 | 0.000135495 | 0.00035271 | 520 | 520 |
| DNASE1L2  | -0.166614129 | 0.000135109 | 0.00035189 | 520 | 516 |
| CEACAM19  | -0.166615027 | 0.000135097 | 0.00035189 | 520 | 520 |
| LOC284578 | -0.166616755 | 0.000135075 | 0.00035189 | 520 | 398 |
| MORN2     | -0.166687084 | 0.000134184 | 0.00034962 | 520 | 520 |
| C3orf31   | -0.166732708 | 0.000133608 | 0.00034822 | 520 | 520 |
| C14orf147 | -0.16675382  | 0.000133343 | 0.00034761 | 520 | 520 |
| C2CD4D    | -0.166767502 | 0.000133171 | 0.0003472  | 520 | 518 |
| KCNK6     | -0.166873277 | 0.00013185  | 0.00034394 | 520 | 520 |
| EIF3IP1   | -0.166892864 | 0.000131607 | 0.00034339 | 520 | 471 |
| C2orf7    | -0.166952591 | 0.000130868 | 0.00034155 | 520 | 520 |
| TBL3      | -0.167001247 | 0.000130269 | 0.00034003 | 520 | 520 |
| MPHOSPH10 | -0.167016833 | 0.000130077 | 0.00033957 | 520 | 520 |
| RPSA      | -0.167248182 | 0.000127267 | 0.00033267 | 520 | 520 |
| KIAA0319  | -0.167265742 | 0.000127056 | 0.00033216 | 520 | 501 |
| FBXW4     | -0.167314994 | 0.000126466 | 0.00033075 | 520 | 520 |
| TDRD7     | -0.167347759 | 0.000126075 | 0.00032981 | 520 | 520 |
| CCDC34    | -0.167371326 | 0.000125794 | 0.00032912 | 520 | 520 |

|          |              |             |            |     |     |
|----------|--------------|-------------|------------|-----|-----|
| CD24     | -0.167404269 | 0.000125403 | 0.00032814 | 520 | 520 |
| PPIF     | -0.167410627 | 0.000125328 | 0.00032798 | 520 | 520 |
| UBE2MP1  | -0.167567712 | 0.000123479 | 0.00032327 | 520 | 520 |
| MFAP1    | -0.167608778 | 0.000123    | 0.00032206 | 520 | 520 |
| WDR18    | -0.167615632 | 0.00012292  | 0.00032189 | 520 | 520 |
| ATAD3A   | -0.167619461 | 0.000122876 | 0.00032182 | 520 | 520 |
| KRT23    | -0.167655546 | 0.000122457 | 0.00032076 | 520 | 519 |
| SPATA21  | -0.167698212 | 0.000121963 | 0.00031955 | 520 | 146 |
| PDCD4    | -0.167743655 | 0.000121439 | 0.0003183  | 520 | 520 |
| MFSD6    | -0.167761105 | 0.000121238 | 0.00031782 | 520 | 520 |
| RPS19BP1 | -0.167844267 | 0.000120286 | 0.0003154  | 520 | 520 |
| DNAJB1   | -0.16790338  | 0.000119614 | 0.00031368 | 520 | 520 |
| C12orf65 | -0.167930155 | 0.000119311 | 0.00031301 | 520 | 520 |
| ACBD7    | -0.168025909 | 0.000118232 | 0.00031022 | 520 | 519 |
| SERGEF   | -0.168028081 | 0.000118208 | 0.00031019 | 520 | 520 |
| KPTN     | -0.168074157 | 0.000117692 | 0.00030892 | 520 | 520 |
| PEX11A   | -0.168095396 | 0.000117455 | 0.00030838 | 520 | 520 |
| DCAF15   | -0.168098049 | 0.000117425 | 0.00030834 | 520 | 520 |
| SFRS1    | -0.168115008 | 0.000117236 | 0.00030793 | 520 | 520 |
| MMAA     | -0.168194096 | 0.000116359 | 0.00030578 | 520 | 520 |
| C1orf57  | -0.168196328 | 0.000116334 | 0.00030576 | 520 | 520 |
| FAM126B  | -0.168208351 | 0.000116202 | 0.00030545 | 520 | 520 |
| METTL5   | -0.168246329 | 0.000115783 | 0.00030443 | 520 | 520 |
| VILL     | -0.168247112 | 0.000115775 | 0.00030443 | 520 | 520 |
| MCRS1    | -0.16826276  | 0.000115603 | 0.00030407 | 520 | 520 |
| EPN2     | -0.168363083 | 0.000114506 | 0.00030138 | 520 | 520 |
| POLL     | -0.168388209 | 0.000114232 | 0.00030074 | 520 | 520 |
| NAPG     | -0.16840467  | 0.000114054 | 0.00030031 | 520 | 520 |
| MTMR1    | -0.168460355 | 0.000113451 | 0.0002988  | 520 | 520 |
| C1D      | -0.168461384 | 0.00011344  | 0.0002988  | 520 | 520 |
| NOL8     | -0.168528496 | 0.000112718 | 0.00029707 | 520 | 520 |
| PLD2     | -0.16854655  | 0.000112525 | 0.00029663 | 520 | 520 |
| GPATCH3  | -0.168563526 | 0.000112343 | 0.00029619 | 520 | 520 |
| HAP1     | -0.16865739  | 0.000111343 | 0.00029371 | 520 | 519 |
| IFI27L1  | -0.168676827 | 0.000111137 | 0.00029321 | 520 | 520 |
| FAM53B   | -0.168678275 | 0.000111122 | 0.0002932  | 520 | 520 |
| TUFT1    | -0.168680585 | 0.000111098 | 0.00029318 | 520 | 520 |
| BEST2    | -0.168727006 | 0.000110607 | 0.000292   | 520 | 459 |
| CEP76    | -0.168742694 | 0.000110442 | 0.0002916  | 520 | 520 |
| ANKMY1   | -0.16875025  | 0.000110363 | 0.00029143 | 520 | 520 |
| MTERFD3  | -0.168817622 | 0.000109657 | 0.00028968 | 520 | 520 |
| ETF1     | -0.168828117 | 0.000109547 | 0.00028946 | 520 | 520 |
| CROCC    | -0.168834513 | 0.00010948  | 0.00028933 | 520 | 520 |
| PNN      | -0.168851681 | 0.000109301 | 0.00028889 | 520 | 520 |
| RECQL4   | -0.168903368 | 0.000108764 | 0.00028751 | 520 | 520 |
| GSDMC    | -0.169053588 | 0.000107216 | 0.00028357 | 520 | 520 |



|              |              |             |            |     |     |
|--------------|--------------|-------------|------------|-----|-----|
| RRP7B        | -0.169078748 | 0.000106959 | 0.00028292 | 520 | 520 |
| SEC14L5      | -0.169166736 | 0.000106064 | 0.00028063 | 520 | 516 |
| SHMT2        | -0.169181752 | 0.000105912 | 0.00028026 | 520 | 520 |
| FBXO24       | -0.169252198 | 0.000105202 | 0.00027842 | 520 | 517 |
| FAM165B      | -0.169263844 | 0.000105085 | 0.00027815 | 520 | 520 |
| CDK9         | -0.169276934 | 0.000104953 | 0.00027785 | 520 | 520 |
| POU5F1B      | -0.169347878 | 0.000104244 | 0.00027603 | 520 | 520 |
| TCEB1        | -0.169424726 | 0.000103481 | 0.00027415 | 520 | 520 |
| MKS1         | -0.169466923 | 0.000103064 | 0.00027309 | 520 | 520 |
| MED9         | -0.169477601 | 0.000102959 | 0.00027284 | 520 | 520 |
| SRD5A1       | -0.169494407 | 0.000102793 | 0.00027244 | 520 | 520 |
| UBE2K        | -0.169494711 | 0.00010279  | 0.00027244 | 520 | 520 |
| CCNH         | -0.169516049 | 0.000102581 | 0.00027198 | 520 | 520 |
| COPS3        | -0.169533184 | 0.000102413 | 0.00027157 | 520 | 520 |
| LYAR         | -0.169535203 | 0.000102393 | 0.00027156 | 520 | 520 |
| MEIG1        | -0.169657452 | 0.000101201 | 0.00026854 | 520 | 363 |
| EXOC1        | -0.16966587  | 0.00010112  | 0.00026836 | 520 | 520 |
| SLTM         | -0.169706541 | 0.000100727 | 0.00026742 | 520 | 520 |
| PWWP2B       | -0.169707298 | 0.000100719 | 0.00026742 | 520 | 520 |
| FAM153A      | -0.169783892 | 1.00E-04    | 0.00026555 | 520 | 389 |
| DEDD2        | -0.169826927 | 9.96E-05    | 0.00026453 | 520 | 520 |
| LMAN2        | -0.169840866 | 9.94E-05    | 0.00026421 | 520 | 520 |
| CD177        | -0.169901937 | 9.89E-05    | 0.00026284 | 520 | 519 |
| HRASLS       | -0.169932674 | 9.86E-05    | 0.0002621  | 520 | 506 |
| DHX34        | -0.169938552 | 9.85E-05    | 0.00026199 | 520 | 520 |
| PPP2R2D      | -0.169943409 | 9.85E-05    | 0.0002619  | 520 | 520 |
| EEF1G        | -0.16996999  | 9.82E-05    | 0.00026127 | 520 | 520 |
| LOC100132832 | -0.170001097 | 9.79E-05    | 0.00026056 | 520 | 512 |
| TAF10        | -0.170041038 | 9.75E-05    | 0.00025963 | 520 | 520 |
| RNF207       | -0.170130456 | 9.67E-05    | 0.00025754 | 520 | 520 |
| WDR59        | -0.170171237 | 9.63E-05    | 0.00025661 | 520 | 520 |
| SH3YL1       | -0.170210369 | 9.60E-05    | 0.00025574 | 520 | 520 |
| TTLL9        | -0.170210899 | 9.60E-05    | 0.00025574 | 520 | 514 |
| GFOD2        | -0.170239777 | 9.57E-05    | 0.00025509 | 520 | 520 |
| TTLL10       | -0.170249209 | 9.56E-05    | 0.00025489 | 520 | 455 |
| HAUS7        | -0.170296135 | 9.52E-05    | 0.00025381 | 520 | 520 |
| ATAD3B       | -0.170377502 | 9.44E-05    | 0.00025187 | 520 | 520 |
| NEIL1        | -0.170395635 | 9.43E-05    | 0.00025146 | 520 | 520 |
| SNORA7B      | -0.170424621 | 9.40E-05    | 0.0002508  | 520 | 498 |
| GOLGA6L10    | -0.170479144 | 9.35E-05    | 0.00024955 | 520 | 520 |
| C3orf42      | -0.17051251  | 9.32E-05    | 0.00024882 | 520 | 518 |
| VDAC1        | -0.170528906 | 9.31E-05    | 0.00024849 | 520 | 520 |
| PRDM13       | -0.170551593 | 9.29E-05    | 0.00024805 | 520 | 389 |
| GNMT         | -0.170558199 | 9.28E-05    | 0.00024792 | 520 | 505 |
| LOC100272228 | -0.170612404 | 9.23E-05    | 0.0002467  | 520 | 519 |
| UCK1         | -0.170653822 | 9.20E-05    | 0.00024578 | 520 | 520 |

|              |              |          |            |     |     |
|--------------|--------------|----------|------------|-----|-----|
| BOLA3        | -0.170685397 | 9.17E-05 | 0.0002451  | 520 | 520 |
| PPP2CB       | -0.170692976 | 9.16E-05 | 0.00024495 | 520 | 520 |
| TCTEX1D2     | -0.170750025 | 9.11E-05 | 0.00024367 | 520 | 520 |
| DHODH        | -0.170761515 | 9.10E-05 | 0.00024344 | 520 | 520 |
| TRIM14       | -0.170764346 | 9.10E-05 | 0.0002434  | 520 | 520 |
| RPS4X        | -0.170775362 | 9.09E-05 | 0.00024318 | 520 | 520 |
| KIAA0664P3   | -0.17080451  | 9.06E-05 | 0.00024253 | 520 | 520 |
| SORD         | -0.170807784 | 9.06E-05 | 0.00024248 | 520 | 520 |
| UPK3B        | -0.170912312 | 8.97E-05 | 0.00024015 | 520 | 516 |
| OVGP1        | -0.170944809 | 8.94E-05 | 0.00023946 | 520 | 520 |
| FLJ35024     | -0.171061197 | 8.84E-05 | 0.00023694 | 520 | 505 |
| LMNB1        | -0.171094768 | 8.81E-05 | 0.00023624 | 520 | 520 |
| CSK          | -0.171119824 | 8.79E-05 | 0.00023576 | 520 | 520 |
| SCAMP2       | -0.171126246 | 8.79E-05 | 0.00023565 | 520 | 520 |
| HMGCR        | -0.171141771 | 8.77E-05 | 0.00023532 | 520 | 520 |
| ANKRD37      | -0.171173063 | 8.75E-05 | 0.00023468 | 520 | 520 |
| TMEM85       | -0.171178421 | 8.74E-05 | 0.00023459 | 520 | 520 |
| FLJ45244     | -0.171279503 | 8.66E-05 | 0.00023246 | 520 | 520 |
| CDKN2AIPNL   | -0.171330871 | 8.62E-05 | 0.00023146 | 520 | 520 |
| C14orf184    | -0.171398164 | 8.56E-05 | 0.00022999 | 520 | 304 |
| AGAP7        | -0.171403112 | 8.56E-05 | 0.00022991 | 520 | 518 |
| TRPM6        | -0.171414747 | 8.55E-05 | 0.00022969 | 520 | 517 |
| ZIC2         | -0.171447079 | 8.52E-05 | 0.000229   | 520 | 519 |
| SLC10A1      | -0.171455113 | 8.51E-05 | 0.00022885 | 520 | 221 |
| SNX31        | -0.171482789 | 8.49E-05 | 0.0002283  | 520 | 485 |
| CDCA3        | -0.17153625  | 8.45E-05 | 0.00022718 | 520 | 520 |
| TDRG1        | -0.171554802 | 8.43E-05 | 0.00022681 | 520 | 270 |
| LOC100130987 | -0.171579882 | 8.41E-05 | 0.00022629 | 520 | 517 |
| NDUFS8       | -0.17159246  | 8.40E-05 | 0.00022604 | 520 | 520 |
| CCNE2        | -0.171605835 | 8.39E-05 | 0.00022578 | 520 | 520 |
| LOC143666    | -0.171619555 | 8.38E-05 | 0.00022554 | 520 | 520 |
| ZNF346       | -0.171696863 | 8.32E-05 | 0.00022392 | 520 | 520 |
| LOC400931    | -0.171697044 | 8.32E-05 | 0.00022392 | 520 | 520 |
| NCRNA00202   | -0.171754388 | 8.27E-05 | 0.00022273 | 520 | 480 |
| STAG3L3      | -0.171779223 | 8.25E-05 | 0.00022225 | 520 | 520 |
| FAM134C      | -0.171792996 | 8.24E-05 | 0.00022202 | 520 | 520 |
| NADSYN1      | -0.171794262 | 8.24E-05 | 0.00022202 | 520 | 520 |
| TBCC         | -0.171826103 | 8.21E-05 | 0.00022137 | 520 | 520 |
| THAP4        | -0.171857121 | 8.19E-05 | 0.00022073 | 520 | 520 |
| ZNF18        | -0.171967098 | 8.10E-05 | 0.00021848 | 520 | 520 |
| METTL2A      | -0.172004502 | 8.07E-05 | 0.00021771 | 520 | 520 |
| POLR2J       | -0.172032789 | 8.05E-05 | 0.00021717 | 520 | 520 |
| ADAD2        | -0.172094116 | 8.00E-05 | 0.00021591 | 520 | 499 |
| CCDC22       | -0.172101726 | 8.00E-05 | 0.00021581 | 520 | 520 |
| TRAPPC5      | -0.172106831 | 7.99E-05 | 0.00021573 | 520 | 520 |
| PWRN2        | -0.172154551 | 7.95E-05 | 0.00021482 | 520 | 73  |

|              |              |          |            |     |     |
|--------------|--------------|----------|------------|-----|-----|
| DECR2        | -0.172213824 | 7.91E-05 | 0.00021365 | 520 | 520 |
| MED31        | -0.172233177 | 7.89E-05 | 0.00021327 | 520 | 520 |
| BRIX1        | -0.172244864 | 7.88E-05 | 0.00021306 | 520 | 520 |
| KLHDC9       | -0.172246929 | 7.88E-05 | 0.00021305 | 520 | 507 |
| LOC100131434 | -0.172279125 | 7.86E-05 | 0.00021244 | 520 | 519 |
| KRTCAP3      | -0.17229306  | 7.85E-05 | 0.00021218 | 520 | 520 |
| ISOC2        | -0.172469513 | 7.71E-05 | 0.00020871 | 520 | 520 |
| TTC22        | -0.172475511 | 7.71E-05 | 0.00020862 | 520 | 520 |
| FASTK        | -0.172487077 | 7.70E-05 | 0.00020841 | 520 | 520 |
| C19orf56     | -0.172490051 | 7.70E-05 | 0.00020838 | 520 | 520 |
| SLC4A5       | -0.172500272 | 7.69E-05 | 0.0002082  | 520 | 520 |
| C7orf47      | -0.17256671  | 7.64E-05 | 0.00020691 | 520 | 520 |
| CAPN10       | -0.172604435 | 7.61E-05 | 0.00020621 | 520 | 520 |
| ANKRD13D     | -0.172657343 | 7.57E-05 | 0.00020518 | 520 | 520 |
| TAPT1        | -0.172665903 | 7.57E-05 | 0.00020503 | 520 | 520 |
| GRK6         | -0.172694519 | 7.55E-05 | 0.00020449 | 520 | 520 |
| AMH          | -0.17272735  | 7.52E-05 | 0.00020389 | 520 | 487 |
| C9orf119     | -0.172745351 | 7.51E-05 | 0.00020356 | 520 | 520 |
| EIF3CL       | -0.172768616 | 7.49E-05 | 0.00020316 | 520 | 520 |
| TTLL13       | -0.172777272 | 7.49E-05 | 0.00020301 | 520 | 520 |
| WDR76        | -0.172781282 | 7.48E-05 | 0.00020296 | 520 | 520 |
| TREH         | -0.172822104 | 7.45E-05 | 0.00020221 | 520 | 176 |
| MAPKSP1      | -0.172851099 | 7.43E-05 | 0.00020169 | 520 | 520 |
| ATP6V1C2     | -0.17285281  | 7.43E-05 | 0.00020168 | 520 | 520 |
| LOC388796    | -0.172896816 | 7.40E-05 | 0.00020087 | 520 | 520 |
| MZF1         | -0.172983014 | 7.34E-05 | 0.00019933 | 520 | 520 |
| MCM10        | -0.173018052 | 7.31E-05 | 0.00019873 | 520 | 520 |
| PPIAL4G      | -0.17315129  | 7.22E-05 | 0.00019619 | 520 | 520 |
| FARSA        | -0.173237846 | 7.16E-05 | 0.00019459 | 520 | 520 |
| SDCCAG3      | -0.173257442 | 7.14E-05 | 0.00019424 | 520 | 520 |
| WDR4         | -0.173336064 | 7.09E-05 | 0.00019283 | 520 | 520 |
| CRYGS        | -0.173407957 | 7.04E-05 | 0.00019158 | 520 | 518 |
| MAP7         | -0.173455879 | 7.01E-05 | 0.00019074 | 520 | 520 |
| TNFAIP8      | -0.173470073 | 7.00E-05 | 0.0001905  | 520 | 520 |
| FANCG        | -0.173560101 | 6.94E-05 | 0.00018893 | 520 | 520 |
| NUDT15       | -0.173599601 | 6.91E-05 | 0.00018823 | 520 | 520 |
| UBE2S        | -0.173621678 | 6.89E-05 | 0.00018785 | 520 | 520 |
| TRIP10       | -0.173632672 | 6.89E-05 | 0.00018767 | 520 | 520 |
| CLPX         | -0.173650911 | 6.87E-05 | 0.00018736 | 520 | 520 |
| NVL          | -0.173655542 | 6.87E-05 | 0.0001873  | 520 | 520 |
| OAS1         | -0.173670486 | 6.86E-05 | 0.00018705 | 520 | 520 |
| MKRN1        | -0.173722361 | 6.83E-05 | 0.00018615 | 520 | 520 |
| C1orf21      | -0.173734542 | 6.82E-05 | 0.00018596 | 520 | 520 |
| LOC338799    | -0.173805139 | 6.77E-05 | 0.00018478 | 520 | 520 |
| SAP30BP      | -0.173809116 | 6.77E-05 | 0.00018473 | 520 | 520 |
| NAGK         | -0.173887708 | 6.72E-05 | 0.00018336 | 520 | 520 |

|           |              |          |            |     |     |
|-----------|--------------|----------|------------|-----|-----|
| PRSS3     | -0.173975055 | 6.66E-05 | 0.00018194 | 520 | 514 |
| FN3KRP    | -0.17399309  | 6.65E-05 | 0.00018165 | 520 | 520 |
| NGLY1     | -0.174032789 | 6.62E-05 | 0.00018096 | 520 | 520 |
| POLR2F    | -0.174057525 | 6.61E-05 | 0.00018055 | 520 | 520 |
| UQCRC2    | -0.174123087 | 6.56E-05 | 0.00017949 | 520 | 520 |
| SMU1      | -0.174151368 | 6.54E-05 | 0.00017902 | 520 | 520 |
| FBXL15    | -0.174168083 | 6.53E-05 | 0.00017875 | 520 | 520 |
| MSLNL     | -0.174177995 | 6.53E-05 | 0.0001786  | 520 | 220 |
| PABPC1L   | -0.174206833 | 6.51E-05 | 0.00017812 | 520 | 520 |
| CCT8      | -0.174218774 | 6.50E-05 | 0.00017798 | 520 | 520 |
| RBBP6     | -0.174252309 | 6.48E-05 | 0.00017742 | 520 | 520 |
| CDC45     | -0.17432844  | 6.43E-05 | 0.00017617 | 520 | 520 |
| SPTBN2    | -0.174338132 | 6.43E-05 | 0.00017602 | 520 | 520 |
| GPR78     | -0.174384786 | 6.40E-05 | 0.00017527 | 520 | 403 |
| RAVER2    | -0.174392048 | 6.39E-05 | 0.00017516 | 520 | 520 |
| BCL2L10   | -0.174392648 | 6.39E-05 | 0.00017516 | 520 | 512 |
| DDB2      | -0.174532316 | 6.30E-05 | 0.00017288 | 520 | 520 |
| CBWD6     | -0.174646618 | 6.23E-05 | 0.00017106 | 520 | 520 |
| LRRC47    | -0.174679018 | 6.21E-05 | 0.00017054 | 520 | 520 |
| ETFB      | -0.174819692 | 6.13E-05 | 0.00016826 | 520 | 520 |
| MFSD4     | -0.174902749 | 6.08E-05 | 0.00016691 | 520 | 520 |
| LOC400891 | -0.175053037 | 5.99E-05 | 0.00016457 | 520 | 262 |
| ZNRF1     | -0.175063368 | 5.98E-05 | 0.00016442 | 520 | 520 |
| NUDC      | -0.175191128 | 5.91E-05 | 0.00016247 | 520 | 520 |
| RARRES3   | -0.175279329 | 5.86E-05 | 0.00016113 | 520 | 520 |
| MORC4     | -0.175324901 | 5.83E-05 | 0.00016047 | 520 | 520 |
| PPIAL4D   | -0.175345257 | 5.82E-05 | 0.00016017 | 520 | 502 |
| LOC729375 | -0.175364052 | 5.81E-05 | 0.00015992 | 520 | 520 |
| HIST1H1C  | -0.175389774 | 5.79E-05 | 0.00015953 | 520 | 520 |
| PFDN2     | -0.175489408 | 5.74E-05 | 0.00015803 | 520 | 520 |
| C1orf125  | -0.175490226 | 5.74E-05 | 0.00015803 | 520 | 420 |
| RDBP      | -0.17552545  | 5.72E-05 | 0.00015751 | 520 | 520 |
| PLAC8L1   | -0.175604431 | 5.67E-05 | 0.00015631 | 520 | 439 |
| CDKN2BAS  | -0.17565833  | 5.64E-05 | 0.00015556 | 520 | 502 |
| C8orf41   | -0.17566802  | 5.64E-05 | 0.00015543 | 520 | 520 |
| NRF1      | -0.175686729 | 5.63E-05 | 0.00015519 | 520 | 520 |
| CENPA     | -0.175851524 | 5.53E-05 | 0.00015285 | 520 | 520 |
| SERPINB8  | -0.175877189 | 5.52E-05 | 0.00015252 | 520 | 520 |
| SYPL1     | -0.175895039 | 5.51E-05 | 0.00015229 | 520 | 520 |
| TAF7L     | -0.175979932 | 5.46E-05 | 0.00015103 | 520 | 476 |
| PPM1G     | -0.175993209 | 5.46E-05 | 0.00015086 | 520 | 520 |
| ZNF44     | -0.176034971 | 5.43E-05 | 0.00015029 | 520 | 520 |
| FAM24B    | -0.176069498 | 5.42E-05 | 0.00014984 | 520 | 518 |
| DOC2A     | -0.176147114 | 5.37E-05 | 0.00014879 | 520 | 495 |
| PVRL1     | -0.176172128 | 5.36E-05 | 0.00014844 | 520 | 520 |
| LRRC26    | -0.176183415 | 5.35E-05 | 0.0001483  | 520 | 335 |

|           |              |          |            |     |     |
|-----------|--------------|----------|------------|-----|-----|
| ROGDI     | -0.176213826 | 5.34E-05 | 0.00014787 | 520 | 520 |
| SARS2     | -0.176239228 | 5.33E-05 | 0.00014754 | 520 | 520 |
| TGM6      | -0.176297804 | 5.29E-05 | 0.00014676 | 520 | 312 |
| BUB3      | -0.176414236 | 5.23E-05 | 0.00014519 | 520 | 520 |
| XRCC6BP1  | -0.176486321 | 5.20E-05 | 0.00014424 | 520 | 520 |
| C14orf179 | -0.176520193 | 5.18E-05 | 0.00014377 | 520 | 520 |
| C14orf129 | -0.176544149 | 5.17E-05 | 0.00014345 | 520 | 520 |
| KRT40     | -0.176623172 | 5.13E-05 | 0.0001424  | 520 | 265 |
| NOL11     | -0.176658892 | 5.11E-05 | 0.00014192 | 520 | 520 |
| SBSN      | -0.176667365 | 5.10E-05 | 0.00014182 | 520 | 520 |
| CIRBP     | -0.176868844 | 5.00E-05 | 0.00013906 | 520 | 520 |
| RPL13A    | -0.176918124 | 4.98E-05 | 0.00013841 | 520 | 520 |
| CYP4F22   | -0.176922622 | 4.98E-05 | 0.00013837 | 520 | 516 |
| SLC47A2   | -0.176942772 | 4.97E-05 | 0.00013811 | 520 | 519 |
| NOL3      | -0.176946711 | 4.96E-05 | 0.00013808 | 520 | 520 |
| BLOC1S2   | -0.177198224 | 4.84E-05 | 0.00013484 | 520 | 520 |
| SLC25A39  | -0.177229053 | 4.83E-05 | 0.00013446 | 520 | 520 |
| PNCK      | -0.177259602 | 4.81E-05 | 0.00013409 | 520 | 515 |
| GIPR      | -0.177304982 | 4.79E-05 | 0.00013354 | 520 | 512 |
| RPS26P11  | -0.177324267 | 4.78E-05 | 0.0001333  | 520 | 432 |
| LIM2      | -0.177335354 | 4.77E-05 | 0.00013319 | 520 | 246 |
| HMGCS1    | -0.177356067 | 4.76E-05 | 0.00013297 | 520 | 520 |
| VGLL1     | -0.177371021 | 4.76E-05 | 0.00013281 | 520 | 497 |
| C9orf173  | -0.177391111 | 4.75E-05 | 0.00013256 | 520 | 275 |
| PDCD2     | -0.177396178 | 4.75E-05 | 0.00013251 | 520 | 520 |
| SDHAF2    | -0.177422283 | 4.73E-05 | 0.0001322  | 520 | 520 |
| OVCA2     | -0.177515468 | 4.69E-05 | 0.00013101 | 520 | 520 |
| TRAFD1    | -0.177619277 | 4.64E-05 | 0.00012969 | 520 | 520 |
| QARS      | -0.177659129 | 4.62E-05 | 0.00012925 | 520 | 520 |
| SKP1      | -0.177819179 | 4.55E-05 | 0.00012726 | 520 | 520 |
| C12orf60  | -0.177872842 | 4.52E-05 | 0.0001266  | 520 | 520 |
| PLA2G4D   | -0.177919745 | 4.50E-05 | 0.00012606 | 520 | 516 |
| C13orf27  | -0.177986721 | 4.47E-05 | 0.00012527 | 520 | 520 |
| RNF126    | -0.178072431 | 4.43E-05 | 0.00012425 | 520 | 520 |
| DPCD      | -0.178127536 | 4.41E-05 | 0.00012359 | 520 | 520 |
| C14orf166 | -0.178253183 | 4.35E-05 | 0.0001221  | 520 | 520 |
| EME1      | -0.178287092 | 4.34E-05 | 0.00012171 | 520 | 520 |
| MTX2      | -0.178362512 | 4.31E-05 | 0.00012083 | 520 | 520 |
| TAF12     | -0.178461707 | 4.26E-05 | 0.00011968 | 520 | 520 |
| C1orf97   | -0.178464146 | 4.26E-05 | 0.00011967 | 520 | 520 |
| POLD1     | -0.178488551 | 4.25E-05 | 0.00011941 | 520 | 520 |
| TDH       | -0.178571891 | 4.22E-05 | 0.00011851 | 520 | 441 |
| NEDD8     | -0.178628802 | 4.19E-05 | 0.0001179  | 520 | 520 |
| FAM102A   | -0.178631609 | 4.19E-05 | 0.00011788 | 520 | 520 |
| SUV420H2  | -0.178635847 | 4.19E-05 | 0.00011785 | 520 | 520 |
| HPDL      | -0.178659149 | 4.18E-05 | 0.00011759 | 520 | 520 |

|              |              |          |            |     |     |
|--------------|--------------|----------|------------|-----|-----|
| TPD52L1      | -0.178659419 | 4.18E-05 | 0.00011759 | 520 | 520 |
| AP1G2        | -0.178662099 | 4.18E-05 | 0.00011759 | 520 | 520 |
| SNRNP40      | -0.178684554 | 4.17E-05 | 0.00011734 | 520 | 520 |
| C18orf22     | -0.178690281 | 4.17E-05 | 0.00011729 | 520 | 520 |
| CRCT1        | -0.178792903 | 4.12E-05 | 0.00011613 | 520 | 513 |
| GCFC1        | -0.178861583 | 4.10E-05 | 0.00011539 | 520 | 520 |
| DPM3         | -0.178889428 | 4.08E-05 | 0.0001151  | 520 | 520 |
| C19orf62     | -0.179026421 | 4.03E-05 | 0.0001136  | 520 | 520 |
| LY6G6C       | -0.179061069 | 4.01E-05 | 0.00011322 | 520 | 518 |
| RPS20        | -0.179064197 | 4.01E-05 | 0.0001132  | 520 | 520 |
| DCTN2        | -0.179144397 | 3.98E-05 | 0.00011232 | 520 | 520 |
| PTX4         | -0.179378968 | 3.89E-05 | 0.00010977 | 520 | 294 |
| ATG10        | -0.179388403 | 3.88E-05 | 0.00010968 | 520 | 520 |
| LOC100133331 | -0.179392698 | 3.88E-05 | 0.00010965 | 520 | 520 |
| ALOXE3       | -0.179465594 | 3.85E-05 | 0.00010886 | 520 | 520 |
| ERP44        | -0.17946758  | 3.85E-05 | 0.00010885 | 520 | 520 |
| NFKBIZ       | -0.179505152 | 3.84E-05 | 0.00010845 | 520 | 520 |
| SUB1         | -0.17951793  | 3.83E-05 | 0.00010833 | 520 | 520 |
| HN1          | -0.179551124 | 3.82E-05 | 0.00010799 | 520 | 520 |
| FAM125A      | -0.179553728 | 3.82E-05 | 0.00010798 | 520 | 520 |
| WRAP53       | -0.179560955 | 3.82E-05 | 0.00010792 | 520 | 520 |
| MAOA         | -0.179582491 | 3.81E-05 | 0.00010771 | 520 | 520 |
| FMO9P        | -0.179720931 | 3.76E-05 | 0.00010627 | 520 | 399 |
| FARS2        | -0.179728426 | 3.75E-05 | 0.00010621 | 520 | 520 |
| ESYT3        | -0.179750085 | 3.74E-05 | 0.00010601 | 520 | 518 |
| TMEM18       | -0.179804045 | 3.72E-05 | 0.00010546 | 520 | 520 |
| MEIS1        | -0.179882456 | 3.69E-05 | 0.00010468 | 520 | 520 |
| GPX2         | -0.179886968 | 3.69E-05 | 0.00010465 | 520 | 519 |
| PTS          | -0.179897863 | 3.69E-05 | 0.00010455 | 520 | 520 |
| UBE2CBP      | -0.179959868 | 3.67E-05 | 0.00010391 | 520 | 520 |
| E2F8         | -0.179960213 | 3.67E-05 | 0.00010391 | 520 | 520 |
| ODF3B        | -0.180156824 | 3.59E-05 | 0.00010194 | 520 | 520 |
| LOC25845     | -0.180286035 | 3.55E-05 | 0.00010068 | 520 | 520 |
| DAPP1        | -0.180362016 | 3.52E-05 | 9.99E-05   | 520 | 520 |
| C3orf24      | -0.180388874 | 3.51E-05 | 9.97E-05   | 520 | 191 |
| KRR1         | -0.180403852 | 3.50E-05 | 9.96E-05   | 520 | 520 |
| POLR1D       | -0.180451423 | 3.49E-05 | 9.91E-05   | 520 | 520 |
| CHMP4C       | -0.180452033 | 3.49E-05 | 9.91E-05   | 520 | 519 |
| PHB          | -0.180452892 | 3.49E-05 | 9.91E-05   | 520 | 520 |
| METTL4       | -0.180525044 | 3.46E-05 | 9.85E-05   | 520 | 520 |
| WBSCR16      | -0.180571852 | 3.45E-05 | 9.81E-05   | 520 | 520 |
| TACC3        | -0.180593315 | 3.44E-05 | 9.79E-05   | 520 | 520 |
| GTF2H5       | -0.180644204 | 3.42E-05 | 9.75E-05   | 520 | 520 |
| DCTPP1       | -0.180655786 | 3.42E-05 | 9.74E-05   | 520 | 520 |
| CD58         | -0.180706482 | 3.40E-05 | 9.69E-05   | 520 | 520 |
| CHCHD6       | -0.18074682  | 3.38E-05 | 9.65E-05   | 520 | 520 |

|           |              |          |          |     |     |
|-----------|--------------|----------|----------|-----|-----|
| LOC442454 | -0.180761373 | 3.38E-05 | 9.64E-05 | 520 | 520 |
| ADH1C     | -0.180766046 | 3.38E-05 | 9.64E-05 | 520 | 436 |
| CHCHD10   | -0.180861619 | 3.34E-05 | 9.55E-05 | 520 | 520 |
| NKX2-3    | -0.180901727 | 3.33E-05 | 9.51E-05 | 520 | 406 |
| POLD2     | -0.180918122 | 3.33E-05 | 9.50E-05 | 520 | 520 |
| HNRNPH1   | -0.180958975 | 3.31E-05 | 9.47E-05 | 520 | 520 |
| OR7E91P   | -0.18098864  | 3.30E-05 | 9.44E-05 | 520 | 487 |
| C8orf40   | -0.181098388 | 3.27E-05 | 9.33E-05 | 520 | 520 |
| PIPSL     | -0.181162885 | 3.24E-05 | 9.27E-05 | 520 | 520 |
| PARD3     | -0.181178855 | 3.24E-05 | 9.26E-05 | 520 | 520 |
| SC4MOL    | -0.181225814 | 3.22E-05 | 9.22E-05 | 520 | 520 |
| HS3ST1    | -0.181244509 | 3.22E-05 | 9.21E-05 | 520 | 520 |
| C1orf50   | -0.181257596 | 3.21E-05 | 9.20E-05 | 520 | 520 |
| LOC648740 | -0.181300624 | 3.20E-05 | 9.16E-05 | 520 | 465 |
| P2RX2     | -0.181416509 | 3.16E-05 | 9.06E-05 | 520 | 316 |
| CLDN17    | -0.181510248 | 3.13E-05 | 8.97E-05 | 520 | 398 |
| PCSK4     | -0.181574781 | 3.11E-05 | 8.92E-05 | 520 | 519 |
| SLC22A20  | -0.181585937 | 3.11E-05 | 8.91E-05 | 520 | 519 |
| ACOX3     | -0.181587798 | 3.11E-05 | 8.91E-05 | 520 | 520 |
| LOC284100 | -0.181629611 | 3.09E-05 | 8.87E-05 | 520 | 448 |
| FOXH1     | -0.181678412 | 3.08E-05 | 8.83E-05 | 520 | 500 |
| RAE1      | -0.181679924 | 3.08E-05 | 8.83E-05 | 520 | 520 |
| ANAPC11   | -0.181687165 | 3.07E-05 | 8.83E-05 | 520 | 520 |
| MIIP      | -0.181695005 | 3.07E-05 | 8.82E-05 | 520 | 520 |
| MRPL48    | -0.181753036 | 3.05E-05 | 8.77E-05 | 520 | 520 |
| WEE1      | -0.181756917 | 3.05E-05 | 8.77E-05 | 520 | 520 |
| LCT       | -0.18176498  | 3.05E-05 | 8.76E-05 | 520 | 345 |
| PCK2      | -0.181766942 | 3.05E-05 | 8.76E-05 | 520 | 520 |
| EIF4E     | -0.181798401 | 3.04E-05 | 8.74E-05 | 520 | 520 |
| RER1      | -0.181802875 | 3.04E-05 | 8.73E-05 | 520 | 520 |
| NKPD1     | -0.181813375 | 3.04E-05 | 8.73E-05 | 520 | 520 |
| RBX1      | -0.181830838 | 3.03E-05 | 8.71E-05 | 520 | 520 |
| MPHOSPH6  | -0.181875777 | 3.02E-05 | 8.67E-05 | 520 | 520 |
| MRPS18B   | -0.181880329 | 3.01E-05 | 8.67E-05 | 520 | 520 |
| DDT       | -0.181938585 | 3.00E-05 | 8.63E-05 | 520 | 520 |
| SMC1B     | -0.181992326 | 2.98E-05 | 8.58E-05 | 520 | 472 |
| SNAPC4    | -0.182010033 | 2.97E-05 | 8.57E-05 | 520 | 520 |
| NDUFV1    | -0.182011142 | 2.97E-05 | 8.57E-05 | 520 | 520 |
| RPL18A    | -0.182040972 | 2.97E-05 | 8.54E-05 | 520 | 520 |
| LUC7L     | -0.182052736 | 2.96E-05 | 8.54E-05 | 520 | 520 |
| CDC6      | -0.182106868 | 2.95E-05 | 8.49E-05 | 520 | 520 |
| FAM83D    | -0.182108309 | 2.94E-05 | 8.49E-05 | 520 | 520 |
| CISD1     | -0.182162133 | 2.93E-05 | 8.45E-05 | 520 | 520 |
| RPS23     | -0.182174962 | 2.92E-05 | 8.44E-05 | 520 | 520 |
| TESK2     | -0.18219202  | 2.92E-05 | 8.42E-05 | 520 | 520 |
| COMMD1    | -0.182221952 | 2.91E-05 | 8.40E-05 | 520 | 520 |

|           |              |          |          |     |     |
|-----------|--------------|----------|----------|-----|-----|
| PCBD1     | -0.182256443 | 2.90E-05 | 8.37E-05 | 520 | 520 |
| ATP6V0A1  | -0.18230719  | 2.89E-05 | 8.33E-05 | 520 | 520 |
| CWC25     | -0.182308283 | 2.88E-05 | 8.33E-05 | 520 | 520 |
| C19orf52  | -0.182335696 | 2.88E-05 | 8.31E-05 | 520 | 520 |
| NDUFA3    | -0.1823394   | 2.88E-05 | 8.31E-05 | 520 | 520 |
| TAF5      | -0.18235875  | 2.87E-05 | 8.29E-05 | 520 | 520 |
| REM2      | -0.182368624 | 2.87E-05 | 8.29E-05 | 520 | 518 |
| MTHFD2L   | -0.182452068 | 2.84E-05 | 8.22E-05 | 520 | 520 |
| MCM3      | -0.182590993 | 2.80E-05 | 8.11E-05 | 520 | 520 |
| ZNF767    | -0.182736862 | 2.76E-05 | 8.00E-05 | 520 | 520 |
| LIPE      | -0.182739491 | 2.76E-05 | 8.00E-05 | 520 | 520 |
| PAQR4     | -0.182749383 | 2.76E-05 | 7.99E-05 | 520 | 520 |
| GTPBP3    | -0.182757062 | 2.75E-05 | 7.98E-05 | 520 | 520 |
| WNT4      | -0.182900291 | 2.71E-05 | 7.87E-05 | 520 | 520 |
| TMEM86B   | -0.182919633 | 2.71E-05 | 7.86E-05 | 520 | 520 |
| GLO1      | -0.182969484 | 2.70E-05 | 7.82E-05 | 520 | 520 |
| PIGF      | -0.183016347 | 2.68E-05 | 7.78E-05 | 520 | 520 |
| NIF3L1    | -0.183037762 | 2.68E-05 | 7.77E-05 | 520 | 520 |
| PPP4R1    | -0.183049441 | 2.67E-05 | 7.76E-05 | 520 | 520 |
| YBX2      | -0.183059992 | 2.67E-05 | 7.75E-05 | 520 | 487 |
| NUP210    | -0.183177938 | 2.64E-05 | 7.66E-05 | 520 | 520 |
| MCTS1     | -0.183194438 | 2.63E-05 | 7.65E-05 | 520 | 520 |
| UBL7      | -0.183297032 | 2.61E-05 | 7.57E-05 | 520 | 520 |
| LOC148413 | -0.183403513 | 2.58E-05 | 7.49E-05 | 520 | 520 |
| EZR       | -0.183420054 | 2.57E-05 | 7.48E-05 | 520 | 520 |
| TRIM50    | -0.183445047 | 2.57E-05 | 7.46E-05 | 520 | 415 |
| MRPS10    | -0.183464588 | 2.56E-05 | 7.45E-05 | 520 | 520 |
| GRPEL1    | -0.183550431 | 2.54E-05 | 7.39E-05 | 520 | 520 |
| CIB1      | -0.183568364 | 2.53E-05 | 7.37E-05 | 520 | 520 |
| XK        | -0.183759059 | 2.48E-05 | 7.23E-05 | 520 | 518 |
| HIP1R     | -0.183806284 | 2.47E-05 | 7.20E-05 | 520 | 520 |
| PRIMA1    | -0.18385673  | 2.46E-05 | 7.17E-05 | 520 | 516 |
| RPL37     | -0.183990412 | 2.43E-05 | 7.07E-05 | 520 | 520 |
| SNAPIN    | -0.184005897 | 2.42E-05 | 7.06E-05 | 520 | 520 |
| CASZ1     | -0.184049622 | 2.41E-05 | 7.03E-05 | 520 | 520 |
| CDKN3     | -0.18412395  | 2.39E-05 | 6.98E-05 | 520 | 520 |
| TADA1     | -0.184136851 | 2.39E-05 | 6.97E-05 | 520 | 520 |
| EWSR1     | -0.184137535 | 2.39E-05 | 6.97E-05 | 520 | 520 |
| ZNF394    | -0.184254933 | 2.36E-05 | 6.89E-05 | 520 | 520 |
| KIF2C     | -0.184258312 | 2.36E-05 | 6.89E-05 | 520 | 520 |
| FAM135A   | -0.184291345 | 2.35E-05 | 6.87E-05 | 520 | 520 |
| FAM54A    | -0.184300519 | 2.35E-05 | 6.86E-05 | 520 | 520 |
| SPDYE7P   | -0.184300662 | 2.35E-05 | 6.86E-05 | 520 | 512 |
| LOC729991 | -0.184319098 | 2.34E-05 | 6.85E-05 | 520 | 520 |
| ATG4A     | -0.184329065 | 2.34E-05 | 6.84E-05 | 520 | 520 |
| ETFDH     | -0.184411947 | 2.32E-05 | 6.79E-05 | 520 | 520 |



|              |              |          |          |     |     |
|--------------|--------------|----------|----------|-----|-----|
| DSN1         | -0.184609788 | 2.27E-05 | 6.66E-05 | 520 | 520 |
| SNHG10       | -0.184636941 | 2.27E-05 | 6.64E-05 | 520 | 520 |
| TDP2         | -0.184662278 | 2.26E-05 | 6.62E-05 | 520 | 520 |
| PDDC1        | -0.184723644 | 2.25E-05 | 6.58E-05 | 520 | 520 |
| UTP3         | -0.184732658 | 2.25E-05 | 6.58E-05 | 520 | 520 |
| SCGB2A1      | -0.184736064 | 2.24E-05 | 6.58E-05 | 520 | 301 |
| PLA2G4F      | -0.184785743 | 2.23E-05 | 6.54E-05 | 520 | 519 |
| LOC100130933 | -0.184787498 | 2.23E-05 | 6.54E-05 | 520 | 371 |
| RTN3         | -0.184816366 | 2.23E-05 | 6.53E-05 | 520 | 520 |
| RPL31        | -0.184828733 | 2.22E-05 | 6.52E-05 | 520 | 520 |
| ORAI1        | -0.184890932 | 2.21E-05 | 6.48E-05 | 520 | 520 |
| SERAC1       | -0.184899363 | 2.21E-05 | 6.47E-05 | 520 | 520 |
| DHFR         | -0.184966143 | 2.19E-05 | 6.43E-05 | 520 | 520 |
| PLS1         | -0.184966299 | 2.19E-05 | 6.43E-05 | 520 | 520 |
| C12orf45     | -0.185086003 | 2.16E-05 | 6.35E-05 | 520 | 520 |
| ASNA1        | -0.185144085 | 2.15E-05 | 6.32E-05 | 520 | 520 |
| LOC441294    | -0.185285626 | 2.12E-05 | 6.23E-05 | 520 | 520 |
| SAMD1        | -0.185302073 | 2.12E-05 | 6.22E-05 | 520 | 520 |
| TXNDC17      | -0.185351528 | 2.11E-05 | 6.19E-05 | 520 | 520 |
| RSL24D1      | -0.185376456 | 2.10E-05 | 6.17E-05 | 520 | 520 |
| AURKB        | -0.185397815 | 2.10E-05 | 6.16E-05 | 520 | 520 |
| ERAL1        | -0.185425327 | 2.09E-05 | 6.14E-05 | 520 | 520 |
| CSPG5        | -0.185501703 | 2.07E-05 | 6.10E-05 | 520 | 518 |
| TOM1L2       | -0.185604215 | 2.05E-05 | 6.04E-05 | 520 | 520 |
| KCMF1        | -0.185617627 | 2.05E-05 | 6.03E-05 | 520 | 520 |
| CDC42EP4     | -0.185718032 | 2.03E-05 | 5.97E-05 | 520 | 520 |
| POLR2J3      | -0.185725759 | 2.02E-05 | 5.96E-05 | 520 | 520 |
| REXO4        | -0.185773932 | 2.01E-05 | 5.94E-05 | 520 | 520 |
| EIF2B4       | -0.185857131 | 2.00E-05 | 5.89E-05 | 520 | 520 |
| LOC286002    | -0.185989703 | 1.97E-05 | 5.81E-05 | 520 | 355 |
| NSMCE1       | -0.186000474 | 1.97E-05 | 5.80E-05 | 520 | 520 |
| COPE         | -0.186030108 | 1.96E-05 | 5.79E-05 | 520 | 520 |
| EPB41L4B     | -0.186107054 | 1.95E-05 | 5.74E-05 | 520 | 520 |
| ATP6V1F      | -0.186126048 | 1.94E-05 | 5.73E-05 | 520 | 520 |
| PFKFB1       | -0.186186342 | 1.93E-05 | 5.70E-05 | 520 | 505 |
| KIAA0895L    | -0.186311646 | 1.90E-05 | 5.63E-05 | 520 | 520 |
| RUSC1        | -0.18638684  | 1.89E-05 | 5.59E-05 | 520 | 520 |
| C15orf55     | -0.186440223 | 1.88E-05 | 5.55E-05 | 520 | 330 |
| C21orf70     | -0.18653526  | 1.86E-05 | 5.50E-05 | 520 | 520 |
| PPM1N        | -0.186549803 | 1.86E-05 | 5.50E-05 | 520 | 520 |
| MLX          | -0.186568847 | 1.85E-05 | 5.49E-05 | 520 | 520 |
| MED11        | -0.186629045 | 1.84E-05 | 5.46E-05 | 520 | 520 |
| PRINS        | -0.186672011 | 1.83E-05 | 5.43E-05 | 520 | 475 |
| TLK2         | -0.186689084 | 1.83E-05 | 5.42E-05 | 520 | 520 |
| SAFB         | -0.186749566 | 1.82E-05 | 5.39E-05 | 520 | 520 |
| C14orf162    | -0.186772907 | 1.81E-05 | 5.38E-05 | 520 | 451 |

|            |              |          |          |     |     |
|------------|--------------|----------|----------|-----|-----|
| C7orf46    | -0.186866268 | 1.80E-05 | 5.33E-05 | 520 | 518 |
| PSRC1      | -0.186877118 | 1.79E-05 | 5.32E-05 | 520 | 520 |
| PAFAH1B3   | -0.186912867 | 1.79E-05 | 5.31E-05 | 520 | 520 |
| LOC728554  | -0.18692383  | 1.79E-05 | 5.30E-05 | 520 | 520 |
| CNKS3      | -0.187043186 | 1.76E-05 | 5.24E-05 | 520 | 520 |
| PGLS       | -0.1870628   | 1.76E-05 | 5.23E-05 | 520 | 520 |
| TRPT1      | -0.18707466  | 1.76E-05 | 5.22E-05 | 520 | 520 |
| AKAP8L     | -0.187121505 | 1.75E-05 | 5.20E-05 | 520 | 520 |
| GRIN2C     | -0.187142654 | 1.75E-05 | 5.19E-05 | 520 | 520 |
| KCTD9      | -0.187245332 | 1.73E-05 | 5.14E-05 | 520 | 520 |
| ZNF395     | -0.187264803 | 1.72E-05 | 5.13E-05 | 520 | 520 |
| STRC       | -0.187318614 | 1.71E-05 | 5.10E-05 | 520 | 492 |
| CHKB-CPT1B | -0.18736171  | 1.71E-05 | 5.08E-05 | 520 | 520 |
| STOML2     | -0.187363753 | 1.70E-05 | 5.08E-05 | 520 | 520 |
| TEX264     | -0.18737585  | 1.70E-05 | 5.07E-05 | 520 | 520 |
| NME1       | -0.187450791 | 1.69E-05 | 5.04E-05 | 520 | 520 |
| PGP        | -0.187531531 | 1.67E-05 | 5.00E-05 | 520 | 520 |
| HDAC3      | -0.18755463  | 1.67E-05 | 4.99E-05 | 520 | 520 |
| ZIC5       | -0.187571213 | 1.67E-05 | 4.98E-05 | 520 | 512 |
| PLEKHG4    | -0.187645256 | 1.65E-05 | 4.94E-05 | 520 | 520 |
| TUBAL3     | -0.187655286 | 1.65E-05 | 4.94E-05 | 520 | 517 |
| CARD17     | -0.187715003 | 1.64E-05 | 4.91E-05 | 520 | 483 |
| C19orf6    | -0.187724785 | 1.64E-05 | 4.90E-05 | 520 | 520 |
| CYP4X1     | -0.187759862 | 1.64E-05 | 4.88E-05 | 520 | 518 |
| TOE1       | -0.187775659 | 1.63E-05 | 4.88E-05 | 520 | 520 |
| C1orf126   | -0.187777166 | 1.63E-05 | 4.88E-05 | 520 | 517 |
| SIRT5      | -0.187784325 | 1.63E-05 | 4.87E-05 | 520 | 520 |
| HEXIM2     | -0.18780917  | 1.63E-05 | 4.86E-05 | 520 | 520 |
| IDH2       | -0.187814579 | 1.63E-05 | 4.86E-05 | 520 | 520 |
| BUD31      | -0.187865338 | 1.62E-05 | 4.84E-05 | 520 | 520 |
| C8orf74    | -0.187874602 | 1.62E-05 | 4.83E-05 | 520 | 55  |
| GINS1      | -0.188076218 | 1.58E-05 | 4.74E-05 | 520 | 520 |
| CSTF3      | -0.188091152 | 1.58E-05 | 4.73E-05 | 520 | 520 |
| TXN2       | -0.188145885 | 1.57E-05 | 4.70E-05 | 520 | 520 |
| PLAC4      | -0.188169085 | 1.57E-05 | 4.69E-05 | 520 | 507 |
| NOL7       | -0.188180673 | 1.56E-05 | 4.69E-05 | 520 | 520 |
| TBC1D3C    | -0.188191522 | 1.56E-05 | 4.68E-05 | 520 | 481 |
| SIGIRR     | -0.188198741 | 1.56E-05 | 4.68E-05 | 520 | 520 |
| DHRS3      | -0.188217314 | 1.56E-05 | 4.67E-05 | 520 | 520 |
| LOC645676  | -0.188218567 | 1.56E-05 | 4.67E-05 | 520 | 520 |
| TOP3B      | -0.188287723 | 1.55E-05 | 4.64E-05 | 520 | 520 |
| HDCC2      | -0.188305548 | 1.54E-05 | 4.63E-05 | 520 | 520 |
| GBX1       | -0.188347044 | 1.54E-05 | 4.61E-05 | 520 | 119 |
| AGR3       | -0.188350994 | 1.54E-05 | 4.61E-05 | 520 | 281 |
| MAP2K2     | -0.188469891 | 1.52E-05 | 4.56E-05 | 520 | 520 |
| KIAA0114   | -0.188518183 | 1.51E-05 | 4.54E-05 | 520 | 520 |

|           |              |          |          |     |     |
|-----------|--------------|----------|----------|-----|-----|
| LRRFIP2   | -0.188520641 | 1.51E-05 | 4.54E-05 | 520 | 520 |
| C11orf31  | -0.18856827  | 1.50E-05 | 4.51E-05 | 520 | 520 |
| NIPSNAP3A | -0.188570644 | 1.50E-05 | 4.51E-05 | 520 | 520 |
| FLJ45445  | -0.188672629 | 1.48E-05 | 4.47E-05 | 520 | 520 |
| CMPK1     | -0.188715074 | 1.48E-05 | 4.45E-05 | 520 | 520 |
| DDX25     | -0.188720136 | 1.48E-05 | 4.45E-05 | 520 | 273 |
| PLSCR2    | -0.188724492 | 1.48E-05 | 4.45E-05 | 520 | 288 |
| PLEKHN1   | -0.188727818 | 1.48E-05 | 4.44E-05 | 520 | 520 |
| ATP5L2    | -0.188748291 | 1.47E-05 | 4.44E-05 | 520 | 490 |
| ZADH2     | -0.18877448  | 1.47E-05 | 4.42E-05 | 520 | 520 |
| NUF2      | -0.188793149 | 1.47E-05 | 4.42E-05 | 520 | 520 |
| ESCO2     | -0.188854531 | 1.46E-05 | 4.39E-05 | 520 | 520 |
| ADRBK1    | -0.18893309  | 1.44E-05 | 4.36E-05 | 520 | 520 |
| TRABD     | -0.188960863 | 1.44E-05 | 4.34E-05 | 520 | 520 |
| ACIN1     | -0.189028547 | 1.43E-05 | 4.31E-05 | 520 | 520 |
| ACY1      | -0.189095245 | 1.42E-05 | 4.29E-05 | 520 | 520 |
| C11orf80  | -0.189168546 | 1.41E-05 | 4.26E-05 | 520 | 520 |
| LSM6      | -0.189185936 | 1.41E-05 | 4.25E-05 | 520 | 520 |
| HR        | -0.189218857 | 1.40E-05 | 4.24E-05 | 520 | 520 |
| SFRS8     | -0.189269268 | 1.39E-05 | 4.22E-05 | 520 | 520 |
| RPL26     | -0.189290832 | 1.39E-05 | 4.21E-05 | 520 | 520 |
| UPB1      | -0.189377049 | 1.38E-05 | 4.17E-05 | 520 | 480 |
| PSPC1     | -0.189489745 | 1.36E-05 | 4.12E-05 | 520 | 520 |
| CCDC160   | -0.189553406 | 1.35E-05 | 4.10E-05 | 520 | 331 |
| FAM71E1   | -0.189577198 | 1.35E-05 | 4.09E-05 | 520 | 520 |
| SNHG6     | -0.189578831 | 1.35E-05 | 4.09E-05 | 520 | 520 |
| HCN3      | -0.189618173 | 1.34E-05 | 4.07E-05 | 520 | 520 |
| ALDOA     | -0.189642772 | 1.34E-05 | 4.06E-05 | 520 | 520 |
| POLDIP2   | -0.189666704 | 1.34E-05 | 4.05E-05 | 520 | 520 |
| PRAP1     | -0.189679422 | 1.33E-05 | 4.05E-05 | 520 | 466 |
| ATPAF2    | -0.18974609  | 1.32E-05 | 4.02E-05 | 520 | 520 |
| CRIP1     | -0.18982623  | 1.31E-05 | 3.99E-05 | 520 | 520 |
| IQCB1     | -0.189845086 | 1.31E-05 | 3.98E-05 | 520 | 520 |
| PPP6C     | -0.189855841 | 1.31E-05 | 3.97E-05 | 520 | 520 |
| INE2      | -0.189872056 | 1.31E-05 | 3.97E-05 | 520 | 396 |
| SNHG11    | -0.189888011 | 1.30E-05 | 3.96E-05 | 520 | 520 |
| RPUSD3    | -0.189890679 | 1.30E-05 | 3.96E-05 | 520 | 520 |
| KRT32     | -0.189919289 | 1.30E-05 | 3.95E-05 | 520 | 468 |
| TF        | -0.189957682 | 1.29E-05 | 3.93E-05 | 520 | 515 |
| IDH3B     | -0.19002241  | 1.29E-05 | 3.91E-05 | 520 | 520 |
| TIMM17A   | -0.190056445 | 1.28E-05 | 3.89E-05 | 520 | 520 |
| LGI3      | -0.190074367 | 1.28E-05 | 3.89E-05 | 520 | 514 |
| FAM72B    | -0.190127531 | 1.27E-05 | 3.87E-05 | 520 | 520 |
| NT5C2     | -0.190190169 | 1.26E-05 | 3.84E-05 | 520 | 520 |
| RHOXF1    | -0.190283009 | 1.25E-05 | 3.81E-05 | 520 | 272 |
| SNRNP     | -0.19031841  | 1.25E-05 | 3.79E-05 | 520 | 520 |

|          |              |          |          |     |     |
|----------|--------------|----------|----------|-----|-----|
| FAM13AOS | -0.190323929 | 1.24E-05 | 3.79E-05 | 520 | 519 |
| UGT1A7   | -0.190354748 | 1.24E-05 | 3.78E-05 | 520 | 401 |
| FXN      | -0.190373976 | 1.24E-05 | 3.77E-05 | 520 | 520 |
| FAM111B  | -0.190405658 | 1.23E-05 | 3.76E-05 | 520 | 520 |
| NME2P1   | -0.190407107 | 1.23E-05 | 3.76E-05 | 520 | 520 |
| CCT6P1   | -0.190429356 | 1.23E-05 | 3.75E-05 | 520 | 520 |
| CLTA     | -0.190443028 | 1.23E-05 | 3.75E-05 | 520 | 520 |
| C1QBP    | -0.190536534 | 1.22E-05 | 3.71E-05 | 520 | 520 |
| MRPL34   | -0.190563827 | 1.21E-05 | 3.70E-05 | 520 | 520 |
| TFAP2C   | -0.190565159 | 1.21E-05 | 3.70E-05 | 520 | 520 |
| DGCR8    | -0.190574568 | 1.21E-05 | 3.70E-05 | 520 | 520 |
| C6orf223 | -0.19059863  | 1.21E-05 | 3.69E-05 | 520 | 515 |
| CCDC146  | -0.190604413 | 1.21E-05 | 3.69E-05 | 520 | 520 |
| RPS2     | -0.190611759 | 1.21E-05 | 3.68E-05 | 520 | 520 |
| C17orf86 | -0.190613921 | 1.21E-05 | 3.68E-05 | 520 | 520 |
| HIRIP3   | -0.190692568 | 1.20E-05 | 3.65E-05 | 520 | 520 |
| ZMAT5    | -0.190744966 | 1.19E-05 | 3.64E-05 | 520 | 520 |
| SASS6    | -0.190797778 | 1.18E-05 | 3.62E-05 | 520 | 520 |
| PDCL2    | -0.191040586 | 1.15E-05 | 3.53E-05 | 520 | 245 |
| FAM96B   | -0.191064872 | 1.15E-05 | 3.52E-05 | 520 | 520 |
| IK       | -0.191077063 | 1.15E-05 | 3.51E-05 | 520 | 520 |
| TRIP6    | -0.191111638 | 1.14E-05 | 3.50E-05 | 520 | 520 |
| KLK10    | -0.191147021 | 1.14E-05 | 3.49E-05 | 520 | 519 |
| CTU1     | -0.191167385 | 1.14E-05 | 3.48E-05 | 520 | 520 |
| RPS26    | -0.191208054 | 1.13E-05 | 3.47E-05 | 520 | 520 |
| WFDC5    | -0.191238227 | 1.13E-05 | 3.46E-05 | 520 | 516 |
| RPS3A    | -0.191294581 | 1.12E-05 | 3.44E-05 | 520 | 520 |
| RHBDL1   | -0.191306554 | 1.12E-05 | 3.43E-05 | 520 | 520 |
| ZNF77    | -0.191469608 | 1.10E-05 | 3.38E-05 | 520 | 520 |
| C12orf54 | -0.191476848 | 1.10E-05 | 3.37E-05 | 520 | 516 |
| RPS11    | -0.191478434 | 1.10E-05 | 3.37E-05 | 520 | 520 |
| SLED1    | -0.191489976 | 1.10E-05 | 3.37E-05 | 520 | 425 |
| HRAS     | -0.191529788 | 1.09E-05 | 3.36E-05 | 520 | 520 |
| UBL4A    | -0.191550852 | 1.09E-05 | 3.35E-05 | 520 | 520 |
| ENDOU    | -0.191556907 | 1.09E-05 | 3.35E-05 | 520 | 513 |
| 9-Mar    | -0.191559962 | 1.09E-05 | 3.35E-05 | 520 | 520 |
| FLJ39653 | -0.191574942 | 1.09E-05 | 3.34E-05 | 520 | 520 |
| BMP7     | -0.191611376 | 1.08E-05 | 3.33E-05 | 520 | 520 |
| POLA2    | -0.191620871 | 1.08E-05 | 3.33E-05 | 520 | 520 |
| C17orf65 | -0.191630052 | 1.08E-05 | 3.33E-05 | 520 | 520 |
| SCAI     | -0.191645615 | 1.08E-05 | 3.32E-05 | 520 | 520 |
| COIL     | -0.191660716 | 1.08E-05 | 3.32E-05 | 520 | 520 |
| C1orf116 | -0.191697876 | 1.07E-05 | 3.30E-05 | 520 | 520 |
| RPL12    | -0.191707537 | 1.07E-05 | 3.30E-05 | 520 | 520 |
| TMEM160  | -0.191723322 | 1.07E-05 | 3.30E-05 | 520 | 520 |
| EFS      | -0.19174246  | 1.07E-05 | 3.29E-05 | 520 | 520 |

|          |              |          |          |     |     |
|----------|--------------|----------|----------|-----|-----|
| FAM32A   | -0.191761775 | 1.07E-05 | 3.28E-05 | 520 | 520 |
| NGDN     | -0.191806184 | 1.06E-05 | 3.27E-05 | 520 | 520 |
| CORO2A   | -0.191807505 | 1.06E-05 | 3.27E-05 | 520 | 520 |
| GLTPD2   | -0.191854006 | 1.06E-05 | 3.25E-05 | 520 | 319 |
| THEM5    | -0.191857258 | 1.06E-05 | 3.25E-05 | 520 | 517 |
| SUMO1    | -0.191871432 | 1.05E-05 | 3.25E-05 | 520 | 520 |
| TOP1P2   | -0.19190764  | 1.05E-05 | 3.24E-05 | 520 | 517 |
| TRADD    | -0.191916578 | 1.05E-05 | 3.23E-05 | 520 | 520 |
| NT5C3    | -0.191985101 | 1.04E-05 | 3.21E-05 | 520 | 520 |
| GCGR     | -0.192021427 | 1.04E-05 | 3.20E-05 | 520 | 425 |
| JAGN1    | -0.192115807 | 1.03E-05 | 3.17E-05 | 520 | 520 |
| MRPL32   | -0.192124672 | 1.03E-05 | 3.17E-05 | 520 | 520 |
| ZNF367   | -0.192124747 | 1.03E-05 | 3.17E-05 | 520 | 520 |
| TMEM106C | -0.192130597 | 1.02E-05 | 3.16E-05 | 520 | 520 |
| FAM122B  | -0.192183853 | 1.02E-05 | 3.15E-05 | 520 | 520 |
| DYNLT1   | -0.192252846 | 1.01E-05 | 3.13E-05 | 520 | 520 |
| PFDN5    | -0.192266365 | 1.01E-05 | 3.12E-05 | 520 | 520 |
| HCG26    | -0.192268062 | 1.01E-05 | 3.12E-05 | 520 | 520 |
| UXT      | -0.192291331 | 1.01E-05 | 3.11E-05 | 520 | 520 |
| PKN3     | -0.192313422 | 1.00E-05 | 3.11E-05 | 520 | 520 |
| PRDX6    | -0.192316778 | 1.00E-05 | 3.11E-05 | 520 | 520 |
| DPM2     | -0.192337973 | 1.00E-05 | 3.10E-05 | 520 | 520 |
| NCK1     | -0.192401776 | 9.95E-06 | 3.08E-05 | 520 | 520 |
| RFC5     | -0.19242604  | 9.93E-06 | 3.07E-05 | 520 | 520 |
| TMEM161B | -0.192482021 | 9.87E-06 | 3.06E-05 | 520 | 520 |
| AP2S1    | -0.192502789 | 9.84E-06 | 3.05E-05 | 520 | 520 |
| FGF17    | -0.192508301 | 9.84E-06 | 3.05E-05 | 520 | 342 |
| SNUPN    | -0.192565393 | 9.78E-06 | 3.03E-05 | 520 | 520 |
| RPLP2    | -0.192640849 | 9.70E-06 | 3.01E-05 | 520 | 520 |
| C3orf10  | -0.19264288  | 9.70E-06 | 3.01E-05 | 520 | 520 |
| AP1S3    | -0.19276453  | 9.57E-06 | 2.97E-05 | 520 | 520 |
| GJB3     | -0.192772944 | 9.56E-06 | 2.97E-05 | 520 | 520 |
| NDUFAF2  | -0.192826655 | 9.50E-06 | 2.95E-05 | 520 | 520 |
| DDX51    | -0.192853722 | 9.48E-06 | 2.94E-05 | 520 | 520 |
| ARF5     | -0.192867885 | 9.46E-06 | 2.94E-05 | 520 | 520 |
| EPHB6    | -0.192894397 | 9.43E-06 | 2.93E-05 | 520 | 520 |
| ATXN7L2  | -0.192922561 | 9.41E-06 | 2.92E-05 | 520 | 520 |
| LGALS4   | -0.192930038 | 9.40E-06 | 2.92E-05 | 520 | 470 |
| INPP5J   | -0.192981513 | 9.35E-06 | 2.91E-05 | 520 | 520 |
| HSCB     | -0.192981638 | 9.35E-06 | 2.91E-05 | 520 | 520 |
| RPUSD2   | -0.19301981  | 9.31E-06 | 2.89E-05 | 520 | 520 |
| FBRSL1   | -0.193042419 | 9.28E-06 | 2.89E-05 | 520 | 520 |
| DOT1L    | -0.193060749 | 9.27E-06 | 2.88E-05 | 520 | 520 |
| LRFN2    | -0.193174186 | 9.15E-06 | 2.85E-05 | 520 | 431 |
| LGALS7   | -0.19320425  | 9.12E-06 | 2.84E-05 | 520 | 520 |
| LIME1    | -0.193211244 | 9.11E-06 | 2.84E-05 | 520 | 520 |

|           |              |          |          |     |     |
|-----------|--------------|----------|----------|-----|-----|
| TRNAU1AP  | -0.193232276 | 9.09E-06 | 2.84E-05 | 520 | 520 |
| KRT5      | -0.193241936 | 9.08E-06 | 2.83E-05 | 520 | 520 |
| FLOT2     | -0.193248477 | 9.08E-06 | 2.83E-05 | 520 | 520 |
| PLAC8     | -0.193248935 | 9.08E-06 | 2.83E-05 | 520 | 520 |
| RHOT2     | -0.193278043 | 9.05E-06 | 2.82E-05 | 520 | 520 |
| PITPNM3   | -0.193280379 | 9.05E-06 | 2.82E-05 | 520 | 520 |
| BCL2L12   | -0.193314166 | 9.01E-06 | 2.81E-05 | 520 | 520 |
| MYL12B    | -0.193369861 | 8.96E-06 | 2.80E-05 | 520 | 520 |
| TLCD1     | -0.193376372 | 8.95E-06 | 2.80E-05 | 520 | 520 |
| C5orf44   | -0.193379229 | 8.95E-06 | 2.79E-05 | 520 | 520 |
| RBM39     | -0.193383226 | 8.95E-06 | 2.79E-05 | 520 | 520 |
| ACOT13    | -0.19343145  | 8.90E-06 | 2.78E-05 | 520 | 520 |
| C1orf104  | -0.19348337  | 8.85E-06 | 2.77E-05 | 520 | 520 |
| TUBB4     | -0.193517381 | 8.82E-06 | 2.76E-05 | 520 | 520 |
| GCDH      | -0.193532235 | 8.80E-06 | 2.75E-05 | 520 | 520 |
| ECE2      | -0.193643565 | 8.70E-06 | 2.72E-05 | 520 | 520 |
| C15orf42  | -0.193647271 | 8.69E-06 | 2.72E-05 | 520 | 520 |
| NPW       | -0.193739393 | 8.61E-06 | 2.69E-05 | 520 | 510 |
| MRPL40    | -0.193795206 | 8.55E-06 | 2.68E-05 | 520 | 520 |
| ENTPD2    | -0.19380192  | 8.55E-06 | 2.68E-05 | 520 | 520 |
| TPRA1     | -0.193905878 | 8.45E-06 | 2.65E-05 | 520 | 520 |
| OCA2      | -0.193944322 | 8.42E-06 | 2.64E-05 | 520 | 446 |
| FAM46B    | -0.194006181 | 8.36E-06 | 2.62E-05 | 520 | 520 |
| C12orf73  | -0.194022588 | 8.34E-06 | 2.62E-05 | 520 | 520 |
| MRPL11    | -0.194033437 | 8.33E-06 | 2.61E-05 | 520 | 520 |
| TRAPPC2L  | -0.194227643 | 8.16E-06 | 2.56E-05 | 520 | 520 |
| OR2B6     | -0.194296591 | 8.10E-06 | 2.54E-05 | 520 | 366 |
| ELF5      | -0.194409161 | 8.00E-06 | 2.51E-05 | 520 | 464 |
| TTC9B     | -0.194426222 | 7.98E-06 | 2.51E-05 | 520 | 305 |
| FBXO45    | -0.194433467 | 7.98E-06 | 2.51E-05 | 520 | 520 |
| NAA38     | -0.194449107 | 7.96E-06 | 2.51E-05 | 520 | 520 |
| SPC25     | -0.194457157 | 7.96E-06 | 2.50E-05 | 520 | 520 |
| TNFRSF13C | -0.194593784 | 7.84E-06 | 2.47E-05 | 520 | 513 |
| TROAP     | -0.194594577 | 7.84E-06 | 2.47E-05 | 520 | 520 |
| AGAP11    | -0.194608246 | 7.83E-06 | 2.46E-05 | 520 | 518 |
| RAB14     | -0.194621187 | 7.82E-06 | 2.46E-05 | 520 | 520 |
| ABI1      | -0.194665327 | 7.78E-06 | 2.45E-05 | 520 | 520 |
| VPS72     | -0.194713313 | 7.74E-06 | 2.44E-05 | 520 | 520 |
| NDUFB8    | -0.194845905 | 7.63E-06 | 2.41E-05 | 520 | 520 |
| TFAP4     | -0.194878168 | 7.60E-06 | 2.40E-05 | 520 | 520 |
| C15orf48  | -0.194931801 | 7.55E-06 | 2.38E-05 | 520 | 520 |
| MRPL18    | -0.194947703 | 7.54E-06 | 2.38E-05 | 520 | 520 |
| AGR2      | -0.194979293 | 7.51E-06 | 2.37E-05 | 520 | 518 |
| FKBP4     | -0.194995455 | 7.50E-06 | 2.37E-05 | 520 | 520 |
| RIBC1     | -0.195020564 | 7.48E-06 | 2.36E-05 | 520 | 520 |
| RXRA      | -0.195115075 | 7.40E-06 | 2.34E-05 | 520 | 520 |

|           |              |          |          |     |     |
|-----------|--------------|----------|----------|-----|-----|
| EIF1AX    | -0.19511554  | 7.40E-06 | 2.34E-05 | 520 | 520 |
| RPL23     | -0.195216127 | 7.32E-06 | 2.32E-05 | 520 | 520 |
| NDUFB9    | -0.195221556 | 7.32E-06 | 2.32E-05 | 520 | 520 |
| SPINK8    | -0.195226468 | 7.31E-06 | 2.31E-05 | 520 | 85  |
| KLHDC4    | -0.195235645 | 7.31E-06 | 2.31E-05 | 520 | 520 |
| SGK494    | -0.195300345 | 7.25E-06 | 2.30E-05 | 520 | 520 |
| TTLL12    | -0.195324581 | 7.24E-06 | 2.29E-05 | 520 | 520 |
| TMEM101   | -0.195352011 | 7.21E-06 | 2.29E-05 | 520 | 520 |
| VTI1A     | -0.195376599 | 7.19E-06 | 2.28E-05 | 520 | 520 |
| NUDT16L1  | -0.195387346 | 7.19E-06 | 2.28E-05 | 520 | 520 |
| PEX14     | -0.195393377 | 7.18E-06 | 2.28E-05 | 520 | 520 |
| TLX1NB    | -0.195459893 | 7.13E-06 | 2.26E-05 | 520 | 264 |
| LOC285359 | -0.195493444 | 7.10E-06 | 2.25E-05 | 520 | 520 |
| NARF      | -0.195501124 | 7.10E-06 | 2.25E-05 | 520 | 520 |
| ATP6V1G1  | -0.195548368 | 7.06E-06 | 2.24E-05 | 520 | 520 |
| CROCCL1   | -0.195558312 | 7.05E-06 | 2.24E-05 | 520 | 520 |
| F11R      | -0.195631178 | 7.00E-06 | 2.22E-05 | 520 | 520 |
| MAMDC4    | -0.195638858 | 6.99E-06 | 2.22E-05 | 520 | 520 |
| C5orf39   | -0.19567658  | 6.96E-06 | 2.21E-05 | 520 | 520 |
| DEPDC1B   | -0.195710874 | 6.93E-06 | 2.20E-05 | 520 | 520 |
| ZCCHC17   | -0.195743713 | 6.91E-06 | 2.20E-05 | 520 | 520 |
| UNC13B    | -0.195794742 | 6.87E-06 | 2.19E-05 | 520 | 520 |
| STX10     | -0.195835944 | 6.84E-06 | 2.18E-05 | 520 | 520 |
| AAMP      | -0.195840328 | 6.84E-06 | 2.17E-05 | 520 | 520 |
| BCL10     | -0.195925217 | 6.77E-06 | 2.16E-05 | 520 | 520 |
| DCTN3     | -0.196048778 | 6.68E-06 | 2.13E-05 | 520 | 520 |
| GLB1L2    | -0.196051605 | 6.68E-06 | 2.13E-05 | 520 | 518 |
| TOMM20L   | -0.196130962 | 6.62E-06 | 2.11E-05 | 520 | 420 |
| PCOTH     | -0.1962177   | 6.56E-06 | 2.09E-05 | 520 | 514 |
| DIABLO    | -0.196299386 | 6.50E-06 | 2.07E-05 | 520 | 520 |
| ASS1      | -0.196314702 | 6.49E-06 | 2.07E-05 | 520 | 520 |
| ZNF648    | -0.196338041 | 6.47E-06 | 2.06E-05 | 520 | 216 |
| CDC25C    | -0.196387817 | 6.44E-06 | 2.05E-05 | 520 | 520 |
| SELO      | -0.196419225 | 6.41E-06 | 2.05E-05 | 520 | 520 |
| SLC44A4   | -0.196582503 | 6.30E-06 | 2.01E-05 | 520 | 518 |
| DBP       | -0.196589163 | 6.29E-06 | 2.01E-05 | 520 | 520 |
| CPSF3L    | -0.196610086 | 6.28E-06 | 2.01E-05 | 520 | 520 |
| METTL12   | -0.19664335  | 6.26E-06 | 2.00E-05 | 520 | 520 |
| INTS9     | -0.196662379 | 6.24E-06 | 2.00E-05 | 520 | 520 |
| HNRNPC    | -0.196665874 | 6.24E-06 | 1.99E-05 | 520 | 520 |
| IL17C     | -0.196694859 | 6.22E-06 | 1.99E-05 | 520 | 388 |
| MED27     | -0.196724445 | 6.20E-06 | 1.98E-05 | 520 | 520 |
| GPR89C    | -0.196755259 | 6.18E-06 | 1.98E-05 | 520 | 520 |
| EIF1      | -0.196756791 | 6.18E-06 | 1.98E-05 | 520 | 520 |
| XKRX      | -0.196813237 | 6.14E-06 | 1.96E-05 | 520 | 520 |
| P2RY1     | -0.196815996 | 6.14E-06 | 1.96E-05 | 520 | 520 |

|           |              |          |          |     |     |
|-----------|--------------|----------|----------|-----|-----|
| AKR1B10   | -0.196849392 | 6.11E-06 | 1.96E-05 | 520 | 518 |
| CHADL     | -0.196937024 | 6.06E-06 | 1.94E-05 | 520 | 520 |
| PRSS16    | -0.196944424 | 6.05E-06 | 1.94E-05 | 520 | 520 |
| TRPV1     | -0.196955158 | 6.04E-06 | 1.94E-05 | 520 | 520 |
| AKAP8     | -0.19703228  | 5.99E-06 | 1.92E-05 | 520 | 520 |
| RPF2      | -0.197047999 | 5.98E-06 | 1.92E-05 | 520 | 520 |
| MSH5      | -0.197091544 | 5.95E-06 | 1.91E-05 | 520 | 520 |
| S100A6    | -0.197118616 | 5.94E-06 | 1.90E-05 | 520 | 520 |
| ORMDL2    | -0.197125338 | 5.93E-06 | 1.90E-05 | 520 | 520 |
| TBC1D7    | -0.197165499 | 5.90E-06 | 1.89E-05 | 520 | 520 |
| RABL3     | -0.197232136 | 5.86E-06 | 1.88E-05 | 520 | 520 |
| KIAA1875  | -0.19725508  | 5.85E-06 | 1.88E-05 | 520 | 505 |
| ELMO3     | -0.197264393 | 5.84E-06 | 1.87E-05 | 520 | 520 |
| FAM173A   | -0.197266269 | 5.84E-06 | 1.87E-05 | 520 | 520 |
| IKBKB     | -0.197275538 | 5.83E-06 | 1.87E-05 | 520 | 520 |
| PSMB10    | -0.197285676 | 5.83E-06 | 1.87E-05 | 520 | 520 |
| CYP2W1    | -0.197353811 | 5.78E-06 | 1.86E-05 | 520 | 496 |
| HSD17B7P2 | -0.197430791 | 5.73E-06 | 1.84E-05 | 520 | 520 |
| E2F1      | -0.197582128 | 5.64E-06 | 1.81E-05 | 520 | 520 |
| NKIRAS1   | -0.197669307 | 5.58E-06 | 1.80E-05 | 520 | 520 |
| CCDC61    | -0.197709503 | 5.56E-06 | 1.79E-05 | 520 | 520 |
| C4orf27   | -0.197761112 | 5.53E-06 | 1.78E-05 | 520 | 520 |
| RAG1AP1   | -0.19778285  | 5.51E-06 | 1.78E-05 | 520 | 520 |
| RANGAP1   | -0.197784997 | 5.51E-06 | 1.78E-05 | 520 | 520 |
| ZDHHC11   | -0.197819661 | 5.49E-06 | 1.77E-05 | 520 | 518 |
| RBM10     | -0.197833323 | 5.48E-06 | 1.77E-05 | 520 | 520 |
| C9orf125  | -0.197847968 | 5.47E-06 | 1.77E-05 | 520 | 520 |
| IKBKE     | -0.197857102 | 5.47E-06 | 1.76E-05 | 520 | 520 |
| POP4      | -0.197866506 | 5.46E-06 | 1.76E-05 | 520 | 520 |
| C22orf41  | -0.197937487 | 5.42E-06 | 1.75E-05 | 520 | 506 |
| HDDC3     | -0.197951286 | 5.41E-06 | 1.75E-05 | 520 | 520 |
| METRNL    | -0.198007169 | 5.38E-06 | 1.74E-05 | 520 | 520 |
| PRKRIP1   | -0.1980838   | 5.33E-06 | 1.72E-05 | 520 | 520 |
| TEX15     | -0.198110676 | 5.32E-06 | 1.72E-05 | 520 | 334 |
| RFWD2     | -0.198150841 | 5.29E-06 | 1.71E-05 | 520 | 520 |
| SPA17     | -0.198210025 | 5.26E-06 | 1.70E-05 | 520 | 520 |
| TAF6L     | -0.198216402 | 5.25E-06 | 1.70E-05 | 520 | 520 |
| SH3RF2    | -0.198249446 | 5.23E-06 | 1.69E-05 | 520 | 520 |
| IL1F8     | -0.198260989 | 5.23E-06 | 1.69E-05 | 520 | 465 |
| NPIPL3    | -0.19826642  | 5.22E-06 | 1.69E-05 | 520 | 520 |
| FLJ33630  | -0.198414267 | 5.14E-06 | 1.66E-05 | 520 | 520 |
| CDK10     | -0.198423296 | 5.13E-06 | 1.66E-05 | 520 | 520 |
| DMAP1     | -0.198438454 | 5.12E-06 | 1.66E-05 | 520 | 520 |
| PRPF40B   | -0.198506172 | 5.09E-06 | 1.65E-05 | 520 | 520 |
| NDUFB2    | -0.198550184 | 5.06E-06 | 1.64E-05 | 520 | 520 |
| IL17F     | -0.198578619 | 5.04E-06 | 1.64E-05 | 520 | 220 |



|          |              |          |          |     |     |
|----------|--------------|----------|----------|-----|-----|
| C10orf57 | -0.198578804 | 5.04E-06 | 1.64E-05 | 520 | 520 |
| TGM5     | -0.198668694 | 4.99E-06 | 1.62E-05 | 520 | 515 |
| ARL16    | -0.198674591 | 4.99E-06 | 1.62E-05 | 520 | 520 |
| C11orf16 | -0.198695493 | 4.98E-06 | 1.62E-05 | 520 | 360 |
| HIGD2A   | -0.198717502 | 4.97E-06 | 1.61E-05 | 520 | 520 |
| ZNF138   | -0.198755804 | 4.95E-06 | 1.61E-05 | 520 | 520 |
| C15orf21 | -0.198798336 | 4.92E-06 | 1.60E-05 | 520 | 520 |
| VSIG8    | -0.198884453 | 4.88E-06 | 1.58E-05 | 520 | 513 |
| MYST1    | -0.198888198 | 4.87E-06 | 1.58E-05 | 520 | 520 |
| BRP44L   | -0.198896505 | 4.87E-06 | 1.58E-05 | 520 | 520 |
| RPLP1    | -0.198899075 | 4.87E-06 | 1.58E-05 | 520 | 520 |
| CBR1     | -0.198968077 | 4.83E-06 | 1.57E-05 | 520 | 520 |
| WASH2P   | -0.198995416 | 4.82E-06 | 1.57E-05 | 520 | 520 |
| MYEOV2   | -0.198996279 | 4.81E-06 | 1.57E-05 | 520 | 520 |
| IL22     | -0.199000588 | 4.81E-06 | 1.57E-05 | 520 | 168 |
| CYB5R2   | -0.19917525  | 4.72E-06 | 1.54E-05 | 520 | 520 |
| PTMA     | -0.19919252  | 4.71E-06 | 1.54E-05 | 520 | 520 |
| GALNT12  | -0.199212323 | 4.70E-06 | 1.53E-05 | 520 | 520 |
| MRPS2    | -0.199244858 | 4.68E-06 | 1.53E-05 | 520 | 520 |
| HSBP1    | -0.199268606 | 4.67E-06 | 1.52E-05 | 520 | 520 |
| RPL4     | -0.199272749 | 4.67E-06 | 1.52E-05 | 520 | 520 |
| SKA3     | -0.199283686 | 4.66E-06 | 1.52E-05 | 520 | 520 |
| FAM185A  | -0.19940451  | 4.60E-06 | 1.50E-05 | 520 | 520 |
| ATF4     | -0.199445934 | 4.58E-06 | 1.50E-05 | 520 | 520 |
| AFG3L2   | -0.19945811  | 4.57E-06 | 1.49E-05 | 520 | 520 |
| C2orf47  | -0.199571309 | 4.51E-06 | 1.48E-05 | 520 | 520 |
| ZNF782   | -0.199618032 | 4.49E-06 | 1.47E-05 | 520 | 520 |
| AGFG2    | -0.199639249 | 4.48E-06 | 1.47E-05 | 520 | 520 |
| KIFC1    | -0.19970329  | 4.45E-06 | 1.46E-05 | 520 | 520 |
| GPBP1    | -0.199722387 | 4.44E-06 | 1.45E-05 | 520 | 520 |
| SLC8A2   | -0.199727523 | 4.44E-06 | 1.45E-05 | 520 | 488 |
| C19orf33 | -0.199728217 | 4.44E-06 | 1.45E-05 | 520 | 520 |
| HSPC159  | -0.199756054 | 4.42E-06 | 1.45E-05 | 520 | 520 |
| TEKT5    | -0.199759218 | 4.42E-06 | 1.45E-05 | 520 | 392 |
| LEO1     | -0.199796656 | 4.40E-06 | 1.44E-05 | 520 | 520 |
| PIK3C2B  | -0.199926651 | 4.34E-06 | 1.42E-05 | 520 | 520 |
| GOLGA8B  | -0.199966064 | 4.32E-06 | 1.42E-05 | 520 | 520 |
| HOXB1    | -0.199989484 | 4.31E-06 | 1.41E-05 | 520 | 274 |
| HPSE     | -0.200003292 | 4.30E-06 | 1.41E-05 | 520 | 520 |
| RND1     | -0.200112151 | 4.25E-06 | 1.39E-05 | 520 | 520 |
| GALR3    | -0.200143403 | 4.23E-06 | 1.39E-05 | 520 | 203 |
| MRPS14   | -0.200194358 | 4.21E-06 | 1.38E-05 | 520 | 520 |
| PLEKHF2  | -0.200203525 | 4.20E-06 | 1.38E-05 | 520 | 520 |
| CNOT10   | -0.200260712 | 4.18E-06 | 1.37E-05 | 520 | 520 |
| KRTAP5-8 | -0.200305406 | 4.16E-06 | 1.37E-05 | 520 | 299 |
| EEF1E1   | -0.200306632 | 4.16E-06 | 1.37E-05 | 520 | 520 |

|          |              |          |          |     |     |
|----------|--------------|----------|----------|-----|-----|
| MASTL    | -0.200379511 | 4.12E-06 | 1.36E-05 | 520 | 520 |
| PGM2     | -0.200417029 | 4.10E-06 | 1.35E-05 | 520 | 520 |
| NOC4L    | -0.200485715 | 4.07E-06 | 1.34E-05 | 520 | 520 |
| MRPL2    | -0.20053134  | 4.05E-06 | 1.33E-05 | 520 | 520 |
| HYAL1    | -0.200567191 | 4.04E-06 | 1.33E-05 | 520 | 520 |
| RPS6     | -0.200596536 | 4.02E-06 | 1.33E-05 | 520 | 520 |
| BCL3     | -0.20063785  | 4.00E-06 | 1.32E-05 | 520 | 520 |
| CFD      | -0.200653004 | 4.00E-06 | 1.32E-05 | 520 | 520 |
| DTNBP1   | -0.200731035 | 3.96E-06 | 1.31E-05 | 520 | 520 |
| MYB      | -0.200759777 | 3.95E-06 | 1.30E-05 | 520 | 520 |
| MEPCE    | -0.200759912 | 3.95E-06 | 1.30E-05 | 520 | 520 |
| MRPL28   | -0.200779532 | 3.94E-06 | 1.30E-05 | 520 | 520 |
| NUDT12   | -0.200802491 | 3.93E-06 | 1.30E-05 | 520 | 520 |
| HYLS1    | -0.200813529 | 3.92E-06 | 1.30E-05 | 520 | 520 |
| CBR4     | -0.200832136 | 3.92E-06 | 1.29E-05 | 520 | 520 |
| TRMT1    | -0.200838527 | 3.91E-06 | 1.29E-05 | 520 | 520 |
| CYC1     | -0.200903421 | 3.89E-06 | 1.28E-05 | 520 | 520 |
| WDR52    | -0.200912506 | 3.88E-06 | 1.28E-05 | 520 | 520 |
| MVD      | -0.200983518 | 3.85E-06 | 1.27E-05 | 520 | 520 |
| NUSAP1   | -0.200985489 | 3.85E-06 | 1.27E-05 | 520 | 520 |
| WDR73    | -0.201035839 | 3.83E-06 | 1.27E-05 | 520 | 520 |
| GHITM    | -0.201082861 | 3.81E-06 | 1.26E-05 | 520 | 520 |
| ZMAT2    | -0.201119034 | 3.79E-06 | 1.26E-05 | 520 | 520 |
| RAET1G   | -0.201173708 | 3.77E-06 | 1.25E-05 | 520 | 520 |
| ZBTB7A   | -0.2012863   | 3.72E-06 | 1.23E-05 | 520 | 520 |
| VAPA     | -0.201311295 | 3.71E-06 | 1.23E-05 | 520 | 520 |
| C9orf86  | -0.201374219 | 3.68E-06 | 1.22E-05 | 520 | 520 |
| PXMP4    | -0.201382366 | 3.68E-06 | 1.22E-05 | 520 | 520 |
| ZNF266   | -0.20138496  | 3.68E-06 | 1.22E-05 | 520 | 520 |
| POLQ     | -0.201483556 | 3.64E-06 | 1.21E-05 | 520 | 520 |
| SNRPC    | -0.201490481 | 3.64E-06 | 1.21E-05 | 520 | 520 |
| C6orf52  | -0.201541378 | 3.61E-06 | 1.20E-05 | 520 | 509 |
| ZNF90    | -0.201584421 | 3.60E-06 | 1.20E-05 | 520 | 520 |
| C1orf14  | -0.201615154 | 3.58E-06 | 1.19E-05 | 520 | 119 |
| ANAPC5   | -0.201742341 | 3.53E-06 | 1.18E-05 | 520 | 520 |
| PPP1R14D | -0.201943621 | 3.45E-06 | 1.15E-05 | 520 | 366 |
| ETV7     | -0.201982981 | 3.44E-06 | 1.15E-05 | 520 | 520 |
| GSTA1    | -0.202141431 | 3.38E-06 | 1.13E-05 | 520 | 414 |
| LELP1    | -0.202286481 | 3.32E-06 | 1.11E-05 | 520 | 144 |
| GRHL2    | -0.202311254 | 3.31E-06 | 1.11E-05 | 520 | 519 |
| C12orf70 | -0.202312541 | 3.31E-06 | 1.11E-05 | 520 | 519 |
| SETD6    | -0.202464002 | 3.25E-06 | 1.09E-05 | 520 | 520 |
| PLBD1    | -0.202486049 | 3.25E-06 | 1.09E-05 | 520 | 520 |
| LNX1     | -0.202547754 | 3.22E-06 | 1.08E-05 | 520 | 520 |
| KCNE2    | -0.202551064 | 3.22E-06 | 1.08E-05 | 520 | 504 |
| AES      | -0.202644351 | 3.19E-06 | 1.07E-05 | 520 | 520 |

|           |              |          |          |     |     |
|-----------|--------------|----------|----------|-----|-----|
| RUVBL1    | -0.202657426 | 3.18E-06 | 1.07E-05 | 520 | 520 |
| C18orf55  | -0.202673506 | 3.18E-06 | 1.06E-05 | 520 | 520 |
| ANKRD19   | -0.202695071 | 3.17E-06 | 1.06E-05 | 520 | 520 |
| SYT8      | -0.202779803 | 3.14E-06 | 1.05E-05 | 520 | 517 |
| LPAR2     | -0.202827211 | 3.12E-06 | 1.05E-05 | 520 | 520 |
| GLI4      | -0.202853998 | 3.11E-06 | 1.04E-05 | 520 | 520 |
| MRPS31    | -0.202870519 | 3.11E-06 | 1.04E-05 | 520 | 520 |
| TRAPPC2P1 | -0.202880121 | 3.10E-06 | 1.04E-05 | 520 | 520 |
| MED26     | -0.202921652 | 3.09E-06 | 1.04E-05 | 520 | 520 |
| NUBP2     | -0.202936972 | 3.08E-06 | 1.03E-05 | 520 | 520 |
| ARL4D     | -0.203092475 | 3.03E-06 | 1.02E-05 | 520 | 520 |
| FNTA      | -0.203134739 | 3.01E-06 | 1.01E-05 | 520 | 520 |
| NPB       | -0.203310491 | 2.95E-06 | 9.93E-06 | 520 | 499 |
| LOC388955 | -0.203343586 | 2.94E-06 | 9.90E-06 | 520 | 520 |
| GPT       | -0.203412638 | 2.92E-06 | 9.82E-06 | 520 | 520 |
| FUNDC1    | -0.203434475 | 2.91E-06 | 9.80E-06 | 520 | 520 |
| ANKRD35   | -0.203443741 | 2.91E-06 | 9.79E-06 | 520 | 520 |
| NUBP1     | -0.203540142 | 2.88E-06 | 9.69E-06 | 520 | 520 |
| HAGH      | -0.203615287 | 2.85E-06 | 9.61E-06 | 520 | 520 |
| STAR      | -0.203621474 | 2.85E-06 | 9.60E-06 | 520 | 520 |
| FAM186A   | -0.203633792 | 2.85E-06 | 9.59E-06 | 520 | 468 |
| ANKHD1    | -0.203658976 | 2.84E-06 | 9.57E-06 | 520 | 520 |
| NPM2      | -0.203718233 | 2.82E-06 | 9.51E-06 | 520 | 516 |
| ANKZF1    | -0.203766556 | 2.80E-06 | 9.46E-06 | 520 | 520 |
| MTA3      | -0.203791708 | 2.80E-06 | 9.44E-06 | 520 | 520 |
| CSH2      | -0.203831678 | 2.78E-06 | 9.40E-06 | 520 | 84  |
| PIGY      | -0.203863864 | 2.77E-06 | 9.36E-06 | 520 | 520 |
| LMAN1L    | -0.203930062 | 2.75E-06 | 9.30E-06 | 520 | 271 |
| MALAT1    | -0.204067117 | 2.71E-06 | 9.16E-06 | 520 | 520 |
| MIOX      | -0.204134642 | 2.69E-06 | 9.09E-06 | 520 | 382 |
| TMPRSS13  | -0.20417475  | 2.68E-06 | 9.05E-06 | 520 | 519 |
| CHST4     | -0.204209479 | 2.67E-06 | 9.01E-06 | 520 | 387 |
| NFYC      | -0.204256489 | 2.65E-06 | 8.97E-06 | 520 | 520 |
| PSMC1     | -0.204257706 | 2.65E-06 | 8.97E-06 | 520 | 520 |
| ACADS     | -0.204425458 | 2.60E-06 | 8.81E-06 | 520 | 520 |
| GIN1      | -0.204457393 | 2.59E-06 | 8.78E-06 | 520 | 520 |
| ZNF833    | -0.204555779 | 2.56E-06 | 8.68E-06 | 520 | 520 |
| SUV39H1   | -0.204560589 | 2.56E-06 | 8.68E-06 | 520 | 520 |
| MRPS26    | -0.20460948  | 2.55E-06 | 8.63E-06 | 520 | 520 |
| ECT2L     | -0.204633241 | 2.54E-06 | 8.61E-06 | 520 | 517 |
| PIM3      | -0.204655953 | 2.53E-06 | 8.59E-06 | 520 | 520 |
| C21orf57  | -0.204751375 | 2.50E-06 | 8.50E-06 | 520 | 520 |
| NMNAT3    | -0.204770484 | 2.50E-06 | 8.48E-06 | 520 | 520 |
| GNRHR     | -0.204821097 | 2.48E-06 | 8.44E-06 | 520 | 511 |
| SEMA3F    | -0.204823006 | 2.48E-06 | 8.44E-06 | 520 | 520 |
| UBE2B     | -0.204862322 | 2.47E-06 | 8.40E-06 | 520 | 520 |

|           |              |          |          |     |     |
|-----------|--------------|----------|----------|-----|-----|
| ASCL2     | -0.204868858 | 2.47E-06 | 8.40E-06 | 520 | 520 |
| CCDC84    | -0.204900127 | 2.46E-06 | 8.37E-06 | 520 | 520 |
| IL20RB    | -0.204941667 | 2.45E-06 | 8.33E-06 | 520 | 520 |
| GSTA3     | -0.205029539 | 2.43E-06 | 8.25E-06 | 520 | 286 |
| DPCR1     | -0.205039257 | 2.42E-06 | 8.24E-06 | 520 | 315 |
| BIRC5     | -0.205053825 | 2.42E-06 | 8.23E-06 | 520 | 520 |
| PSMD6     | -0.205061293 | 2.42E-06 | 8.22E-06 | 520 | 520 |
| PHLDA2    | -0.205187252 | 2.38E-06 | 8.11E-06 | 520 | 520 |
| SRD5A3    | -0.205196764 | 2.38E-06 | 8.10E-06 | 520 | 520 |
| FAM131C   | -0.205218185 | 2.37E-06 | 8.09E-06 | 520 | 518 |
| OGDHL     | -0.205226577 | 2.37E-06 | 8.08E-06 | 520 | 508 |
| MAPKAPK5  | -0.205260456 | 2.36E-06 | 8.05E-06 | 520 | 520 |
| NFKBIL1   | -0.20530648  | 2.35E-06 | 8.01E-06 | 520 | 520 |
| IL23A     | -0.205326074 | 2.34E-06 | 7.99E-06 | 520 | 520 |
| ANAPC4    | -0.20533383  | 2.34E-06 | 7.99E-06 | 520 | 520 |
| RBMX2     | -0.205364685 | 2.33E-06 | 7.96E-06 | 520 | 520 |
| POLR3B    | -0.205415763 | 2.32E-06 | 7.92E-06 | 520 | 520 |
| NSUN5     | -0.205471429 | 2.30E-06 | 7.87E-06 | 520 | 520 |
| IP6K2     | -0.205471866 | 2.30E-06 | 7.87E-06 | 520 | 520 |
| PDCD2L    | -0.205556685 | 2.28E-06 | 7.80E-06 | 520 | 520 |
| YY1AP1    | -0.205573269 | 2.28E-06 | 7.79E-06 | 520 | 520 |
| C14orf143 | -0.205608863 | 2.27E-06 | 7.76E-06 | 520 | 520 |
| DTYMK     | -0.205672455 | 2.25E-06 | 7.70E-06 | 520 | 520 |
| ZNF324    | -0.20572336  | 2.24E-06 | 7.66E-06 | 520 | 520 |
| KLRG2     | -0.205790686 | 2.22E-06 | 7.60E-06 | 520 | 518 |
| CAMTA1    | -0.205833224 | 2.21E-06 | 7.57E-06 | 520 | 520 |
| LAS1L     | -0.205859179 | 2.20E-06 | 7.55E-06 | 520 | 520 |
| ZNF326    | -0.205885062 | 2.20E-06 | 7.53E-06 | 520 | 520 |
| REEP6     | -0.205910782 | 2.19E-06 | 7.51E-06 | 520 | 520 |
| REV1      | -0.205913652 | 2.19E-06 | 7.51E-06 | 520 | 520 |
| PPM1J     | -0.205925    | 2.19E-06 | 7.50E-06 | 520 | 520 |
| HSPBP1    | -0.205944388 | 2.18E-06 | 7.49E-06 | 520 | 520 |
| PIGU      | -0.205984733 | 2.17E-06 | 7.45E-06 | 520 | 520 |
| COX19     | -0.205985884 | 2.17E-06 | 7.45E-06 | 520 | 520 |
| PRR19     | -0.206021938 | 2.16E-06 | 7.42E-06 | 520 | 520 |
| PDCD10    | -0.206038425 | 2.16E-06 | 7.41E-06 | 520 | 520 |
| UCHL3     | -0.206139248 | 2.13E-06 | 7.33E-06 | 520 | 520 |
| SNHG7     | -0.206213081 | 2.11E-06 | 7.27E-06 | 520 | 520 |
| H2AFJ     | -0.206236364 | 2.11E-06 | 7.25E-06 | 520 | 520 |
| LOC440356 | -0.206277117 | 2.10E-06 | 7.22E-06 | 520 | 399 |
| SCRN2     | -0.206284568 | 2.10E-06 | 7.21E-06 | 520 | 520 |
| C15orf17  | -0.206335074 | 2.09E-06 | 7.17E-06 | 520 | 520 |
| RG9MTD3   | -0.20634858  | 2.08E-06 | 7.16E-06 | 520 | 520 |
| VPS45     | -0.206368159 | 2.08E-06 | 7.15E-06 | 520 | 520 |
| FRAT1     | -0.206386842 | 2.07E-06 | 7.14E-06 | 520 | 520 |
| DAPL1     | -0.206460773 | 2.05E-06 | 7.08E-06 | 520 | 508 |

|           |              |          |          |     |     |
|-----------|--------------|----------|----------|-----|-----|
| ZBTB5     | -0.206489159 | 2.05E-06 | 7.06E-06 | 520 | 520 |
| TSEN34    | -0.206502903 | 2.04E-06 | 7.05E-06 | 520 | 520 |
| FAM108B1  | -0.206513033 | 2.04E-06 | 7.04E-06 | 520 | 520 |
| VSNL1     | -0.206525985 | 2.04E-06 | 7.03E-06 | 520 | 520 |
| SETD4     | -0.206561291 | 2.03E-06 | 7.00E-06 | 520 | 520 |
| SYCE2     | -0.206561488 | 2.03E-06 | 7.00E-06 | 520 | 512 |
| FRMD8     | -0.206627842 | 2.02E-06 | 6.95E-06 | 520 | 520 |
| PPOX      | -0.206631525 | 2.01E-06 | 6.95E-06 | 520 | 520 |
| CDK5RAP1  | -0.206688219 | 2.00E-06 | 6.91E-06 | 520 | 520 |
| DMRTA2    | -0.206707043 | 2.00E-06 | 6.89E-06 | 520 | 425 |
| TRIM16    | -0.206731395 | 1.99E-06 | 6.88E-06 | 520 | 520 |
| HSD17B1   | -0.206799016 | 1.98E-06 | 6.82E-06 | 520 | 520 |
| SLC9A4    | -0.206897549 | 1.95E-06 | 6.75E-06 | 520 | 405 |
| FOXD4L6   | -0.206915738 | 1.95E-06 | 6.74E-06 | 520 | 469 |
| NDUFA9    | -0.206964254 | 1.94E-06 | 6.70E-06 | 520 | 520 |
| PSMB6     | -0.206975186 | 1.94E-06 | 6.69E-06 | 520 | 520 |
| RPS13     | -0.207008181 | 1.93E-06 | 6.67E-06 | 520 | 520 |
| KRT80     | -0.207075941 | 1.91E-06 | 6.62E-06 | 520 | 520 |
| RNF167    | -0.207129304 | 1.90E-06 | 6.58E-06 | 520 | 520 |
| APBB3     | -0.207136265 | 1.90E-06 | 6.58E-06 | 520 | 520 |
| GPR62     | -0.207176319 | 1.89E-06 | 6.55E-06 | 520 | 463 |
| CCDC45    | -0.207221851 | 1.88E-06 | 6.52E-06 | 520 | 520 |
| TSR2      | -0.20726625  | 1.87E-06 | 6.48E-06 | 520 | 520 |
| SEC61B    | -0.207341862 | 1.85E-06 | 6.43E-06 | 520 | 520 |
| DDX55     | -0.207358336 | 1.85E-06 | 6.42E-06 | 520 | 520 |
| DNAJC28   | -0.207483271 | 1.82E-06 | 6.33E-06 | 520 | 520 |
| EPHA10    | -0.207638125 | 1.79E-06 | 6.22E-06 | 520 | 503 |
| SLC48A1   | -0.207723405 | 1.77E-06 | 6.16E-06 | 520 | 520 |
| KRI1      | -0.207787212 | 1.76E-06 | 6.12E-06 | 520 | 520 |
| PLEKHG6   | -0.207883616 | 1.74E-06 | 6.06E-06 | 520 | 520 |
| FANCI     | -0.207898807 | 1.74E-06 | 6.05E-06 | 520 | 520 |
| RPL14     | -0.207947321 | 1.73E-06 | 6.01E-06 | 520 | 520 |
| ZNF205    | -0.207959621 | 1.73E-06 | 6.01E-06 | 520 | 520 |
| CHMP4A    | -0.208048999 | 1.71E-06 | 5.94E-06 | 520 | 520 |
| MOSC1     | -0.208129206 | 1.69E-06 | 5.89E-06 | 520 | 520 |
| TMEM180   | -0.208194245 | 1.68E-06 | 5.85E-06 | 520 | 520 |
| YTHDC1    | -0.208399266 | 1.64E-06 | 5.72E-06 | 520 | 520 |
| MRTO4     | -0.208409543 | 1.64E-06 | 5.72E-06 | 520 | 520 |
| C14orf142 | -0.208512986 | 1.62E-06 | 5.65E-06 | 520 | 520 |
| FBXW10    | -0.208514068 | 1.62E-06 | 5.65E-06 | 520 | 498 |
| TMEM30B   | -0.20852017  | 1.62E-06 | 5.65E-06 | 520 | 520 |
| RPTN      | -0.208541061 | 1.61E-06 | 5.64E-06 | 520 | 506 |
| ZBTB42    | -0.208654326 | 1.59E-06 | 5.57E-06 | 520 | 520 |
| WDR62     | -0.20865928  | 1.59E-06 | 5.56E-06 | 520 | 520 |
| CCDC155   | -0.208722052 | 1.58E-06 | 5.53E-06 | 520 | 240 |
| TMCO4     | -0.2088404   | 1.56E-06 | 5.45E-06 | 520 | 520 |

|            |              |          |          |     |     |
|------------|--------------|----------|----------|-----|-----|
| TRMU       | -0.208846694 | 1.55E-06 | 5.45E-06 | 520 | 520 |
| IL26       | -0.208967532 | 1.53E-06 | 5.38E-06 | 520 | 359 |
| SRP9       | -0.209045967 | 1.52E-06 | 5.33E-06 | 520 | 520 |
| GSTA4      | -0.209080946 | 1.51E-06 | 5.31E-06 | 520 | 520 |
| SMCP       | -0.20910071  | 1.51E-06 | 5.30E-06 | 520 | 279 |
| C17orf89   | -0.209149609 | 1.50E-06 | 5.27E-06 | 520 | 520 |
| EXOSC2     | -0.209179477 | 1.50E-06 | 5.25E-06 | 520 | 520 |
| MDH2       | -0.209211352 | 1.49E-06 | 5.24E-06 | 520 | 520 |
| CDKN2C     | -0.209248153 | 1.48E-06 | 5.21E-06 | 520 | 520 |
| TBC1D3H    | -0.209288424 | 1.48E-06 | 5.19E-06 | 520 | 515 |
| DNTTIP2    | -0.209311446 | 1.47E-06 | 5.18E-06 | 520 | 520 |
| PLLP       | -0.20936585  | 1.46E-06 | 5.15E-06 | 520 | 520 |
| APOA1BP    | -0.209413038 | 1.45E-06 | 5.12E-06 | 520 | 520 |
| PSMD9      | -0.209477696 | 1.44E-06 | 5.09E-06 | 520 | 520 |
| PXMP2      | -0.209503182 | 1.44E-06 | 5.07E-06 | 520 | 520 |
| GPHA2      | -0.209511422 | 1.44E-06 | 5.07E-06 | 520 | 257 |
| UBA5       | -0.209517561 | 1.44E-06 | 5.07E-06 | 520 | 520 |
| PUS1       | -0.209527359 | 1.44E-06 | 5.06E-06 | 520 | 520 |
| IL22RA1    | -0.209608175 | 1.42E-06 | 5.01E-06 | 520 | 520 |
| WHAMM      | -0.209660205 | 1.41E-06 | 4.99E-06 | 520 | 520 |
| NDUFV3     | -0.209671326 | 1.41E-06 | 4.98E-06 | 520 | 520 |
| VRK3       | -0.209694929 | 1.41E-06 | 4.97E-06 | 520 | 520 |
| TXNL1      | -0.209725298 | 1.40E-06 | 4.95E-06 | 520 | 520 |
| SLC4A9     | -0.209741924 | 1.40E-06 | 4.94E-06 | 520 | 392 |
| CRIPAK     | -0.209774633 | 1.39E-06 | 4.92E-06 | 520 | 520 |
| LOC399815  | -0.209794085 | 1.39E-06 | 4.91E-06 | 520 | 488 |
| EAF2       | -0.209820257 | 1.39E-06 | 4.90E-06 | 520 | 520 |
| ZNF598     | -0.20984491  | 1.38E-06 | 4.88E-06 | 520 | 520 |
| TFAP2E     | -0.209861384 | 1.38E-06 | 4.88E-06 | 520 | 520 |
| ACOT8      | -0.209878441 | 1.38E-06 | 4.87E-06 | 520 | 520 |
| TSGA10     | -0.210001522 | 1.36E-06 | 4.80E-06 | 520 | 520 |
| GADD45GIP1 | -0.210111261 | 1.34E-06 | 4.74E-06 | 520 | 520 |
| FAM83F     | -0.210138969 | 1.34E-06 | 4.73E-06 | 520 | 520 |
| CDK3       | -0.210284472 | 1.31E-06 | 4.65E-06 | 520 | 520 |
| C14orf1    | -0.210309288 | 1.31E-06 | 4.64E-06 | 520 | 520 |
| GLE1       | -0.210400337 | 1.29E-06 | 4.59E-06 | 520 | 520 |
| CCDC17     | -0.210553717 | 1.27E-06 | 4.51E-06 | 520 | 519 |
| C21orf71   | -0.210567794 | 1.27E-06 | 4.50E-06 | 520 | 378 |
| AQP5       | -0.210628494 | 1.26E-06 | 4.47E-06 | 520 | 483 |
| QTRT1      | -0.210711931 | 1.25E-06 | 4.43E-06 | 520 | 520 |
| RIBC2      | -0.210787493 | 1.24E-06 | 4.39E-06 | 520 | 518 |
| SENP8      | -0.210836275 | 1.23E-06 | 4.37E-06 | 520 | 520 |
| ZNF700     | -0.210855906 | 1.23E-06 | 4.36E-06 | 520 | 520 |
| HMX2       | -0.210979165 | 1.21E-06 | 4.30E-06 | 520 | 285 |
| ZSCAN16    | -0.211093748 | 1.19E-06 | 4.24E-06 | 520 | 520 |
| TRIM26     | -0.211168056 | 1.18E-06 | 4.20E-06 | 520 | 520 |

|              |              |          |          |     |     |
|--------------|--------------|----------|----------|-----|-----|
| SLBP         | -0.211223261 | 1.17E-06 | 4.18E-06 | 520 | 520 |
| MYCL1        | -0.211331113 | 1.16E-06 | 4.13E-06 | 520 | 520 |
| ORC4L        | -0.211412021 | 1.15E-06 | 4.09E-06 | 520 | 520 |
| NQO2         | -0.211453221 | 1.14E-06 | 4.07E-06 | 520 | 520 |
| C16orf63     | -0.211470261 | 1.14E-06 | 4.06E-06 | 520 | 520 |
| C1orf212     | -0.211497263 | 1.14E-06 | 4.05E-06 | 520 | 520 |
| GTF2IRD1     | -0.211520605 | 1.13E-06 | 4.04E-06 | 520 | 520 |
| NCRNA00219   | -0.211532814 | 1.13E-06 | 4.03E-06 | 520 | 520 |
| TEDDM1       | -0.211555982 | 1.13E-06 | 4.02E-06 | 520 | 291 |
| GDA          | -0.211588443 | 1.12E-06 | 4.01E-06 | 520 | 482 |
| LOC100128788 | -0.211602725 | 1.12E-06 | 4.00E-06 | 520 | 518 |
| PADI1        | -0.211622208 | 1.12E-06 | 4.00E-06 | 520 | 516 |
| NDUFAF4      | -0.211695678 | 1.11E-06 | 3.96E-06 | 520 | 520 |
| FAM160B2     | -0.211758689 | 1.10E-06 | 3.94E-06 | 520 | 520 |
| TMEM159      | -0.211834629 | 1.09E-06 | 3.90E-06 | 520 | 520 |
| TRA2A        | -0.211902652 | 1.08E-06 | 3.87E-06 | 520 | 520 |
| TUBA1C       | -0.211932214 | 1.08E-06 | 3.86E-06 | 520 | 520 |
| HRK          | -0.211993048 | 1.07E-06 | 3.83E-06 | 520 | 422 |
| ZBTB7C       | -0.21199838  | 1.07E-06 | 3.83E-06 | 520 | 520 |
| SFXN2        | -0.212087133 | 1.06E-06 | 3.80E-06 | 520 | 520 |
| CPNE7        | -0.212110036 | 1.06E-06 | 3.79E-06 | 520 | 520 |
| RNPS1        | -0.2121629   | 1.05E-06 | 3.76E-06 | 520 | 520 |
| CSNK2B       | -0.212199038 | 1.05E-06 | 3.75E-06 | 520 | 520 |
| BCKDHA       | -0.212303868 | 1.03E-06 | 3.70E-06 | 520 | 520 |
| EEFSEC       | -0.212317011 | 1.03E-06 | 3.70E-06 | 520 | 520 |
| C12orf48     | -0.212368302 | 1.02E-06 | 3.68E-06 | 520 | 520 |
| FDPSL2A      | -0.212538054 | 1.00E-06 | 3.61E-06 | 520 | 519 |
| C9orf163     | -0.212600609 | 9.96E-07 | 3.58E-06 | 520 | 511 |
| SOX2         | -0.212606259 | 9.95E-07 | 3.58E-06 | 520 | 520 |
| TMEM11       | -0.212667303 | 9.88E-07 | 3.55E-06 | 520 | 520 |
| C6orf130     | -0.212701595 | 9.84E-07 | 3.54E-06 | 520 | 520 |
| DGKA         | -0.212739416 | 9.80E-07 | 3.52E-06 | 520 | 520 |
| MRPL9        | -0.212754838 | 9.78E-07 | 3.52E-06 | 520 | 520 |
| FBXW5        | -0.212805879 | 9.72E-07 | 3.50E-06 | 520 | 520 |
| C11orf52     | -0.212812436 | 9.71E-07 | 3.50E-06 | 520 | 519 |
| NDUFA11      | -0.212870553 | 9.64E-07 | 3.47E-06 | 520 | 520 |
| SF3B5        | -0.212935939 | 9.57E-07 | 3.45E-06 | 520 | 520 |
| DDX49        | -0.213003069 | 9.49E-07 | 3.42E-06 | 520 | 520 |
| AFG3L1       | -0.213073961 | 9.41E-07 | 3.39E-06 | 520 | 520 |
| LYPLA2       | -0.213141283 | 9.34E-07 | 3.37E-06 | 520 | 520 |
| REPS1        | -0.213204932 | 9.26E-07 | 3.34E-06 | 520 | 520 |
| DOHH         | -0.21326716  | 9.20E-07 | 3.32E-06 | 520 | 520 |
| GPRIN2       | -0.213347733 | 9.11E-07 | 3.29E-06 | 520 | 517 |
| GLMN         | -0.213394883 | 9.06E-07 | 3.27E-06 | 520 | 520 |
| CGN          | -0.213440988 | 9.01E-07 | 3.25E-06 | 520 | 520 |
| CLN3         | -0.213503277 | 8.94E-07 | 3.23E-06 | 520 | 520 |

|           |              |          |          |     |     |
|-----------|--------------|----------|----------|-----|-----|
| C6orf108  | -0.213690674 | 8.74E-07 | 3.16E-06 | 520 | 520 |
| C12orf34  | -0.21370267  | 8.73E-07 | 3.16E-06 | 520 | 520 |
| SNHG8     | -0.213758833 | 8.67E-07 | 3.14E-06 | 520 | 520 |
| RBBP7     | -0.213766514 | 8.66E-07 | 3.13E-06 | 520 | 520 |
| CCDC154   | -0.213820916 | 8.60E-07 | 3.11E-06 | 520 | 472 |
| PRCC      | -0.213841763 | 8.58E-07 | 3.11E-06 | 520 | 520 |
| IVL       | -0.213846768 | 8.58E-07 | 3.10E-06 | 520 | 519 |
| VBP1      | -0.213857356 | 8.57E-07 | 3.10E-06 | 520 | 520 |
| SPNS2     | -0.213989886 | 8.43E-07 | 3.05E-06 | 520 | 520 |
| ROMO1     | -0.214010611 | 8.41E-07 | 3.05E-06 | 520 | 520 |
| WDR61     | -0.214063661 | 8.36E-07 | 3.03E-06 | 520 | 520 |
| NTHL1     | -0.214086181 | 8.33E-07 | 3.02E-06 | 520 | 520 |
| ZC3H12A   | -0.214192308 | 8.23E-07 | 2.99E-06 | 520 | 520 |
| HAUS8     | -0.214209723 | 8.21E-07 | 2.98E-06 | 520 | 520 |
| GALR2     | -0.214225393 | 8.19E-07 | 2.98E-06 | 520 | 512 |
| EIF4A3    | -0.214306464 | 8.11E-07 | 2.95E-06 | 520 | 520 |
| C14orf79  | -0.21445019  | 7.97E-07 | 2.90E-06 | 520 | 520 |
| RAB11FIP1 | -0.214477381 | 7.95E-07 | 2.89E-06 | 520 | 520 |
| NUP85     | -0.214489958 | 7.94E-07 | 2.89E-06 | 520 | 520 |
| TUSC2     | -0.214511023 | 7.92E-07 | 2.88E-06 | 520 | 520 |
| STXBP2    | -0.214599196 | 7.83E-07 | 2.85E-06 | 520 | 520 |
| RPP25     | -0.214604108 | 7.83E-07 | 2.85E-06 | 520 | 520 |
| VRK1      | -0.214712664 | 7.73E-07 | 2.81E-06 | 520 | 520 |
| HDAC8     | -0.21475992  | 7.68E-07 | 2.80E-06 | 520 | 520 |
| STUB1     | -0.21482242  | 7.62E-07 | 2.78E-06 | 520 | 520 |
| PAF1      | -0.214830277 | 7.62E-07 | 2.78E-06 | 520 | 520 |
| S100A7    | -0.214912222 | 7.54E-07 | 2.75E-06 | 520 | 518 |
| C10orf54  | -0.214922626 | 7.53E-07 | 2.75E-06 | 520 | 520 |
| DHDH      | -0.214933701 | 7.52E-07 | 2.75E-06 | 520 | 520 |
| PLEKHG7   | -0.214990626 | 7.47E-07 | 2.73E-06 | 520 | 454 |
| GLOD5     | -0.215116301 | 7.36E-07 | 2.69E-06 | 520 | 271 |
| TCEB2     | -0.215120443 | 7.35E-07 | 2.69E-06 | 520 | 520 |
| LSM2      | -0.215188566 | 7.29E-07 | 2.67E-06 | 520 | 520 |
| KCP       | -0.215215384 | 7.27E-07 | 2.66E-06 | 520 | 520 |
| MRPL51    | -0.215236671 | 7.25E-07 | 2.65E-06 | 520 | 520 |
| THAP3     | -0.215345968 | 7.16E-07 | 2.62E-06 | 520 | 520 |
| WDR74     | -0.215347913 | 7.15E-07 | 2.62E-06 | 520 | 520 |
| VSIG2     | -0.215475475 | 7.04E-07 | 2.58E-06 | 520 | 495 |
| ADK       | -0.21551073  | 7.01E-07 | 2.57E-06 | 520 | 520 |
| MRPL41    | -0.21551457  | 7.01E-07 | 2.57E-06 | 520 | 520 |
| FAU       | -0.215543416 | 6.99E-07 | 2.56E-06 | 520 | 520 |
| C1orf66   | -0.215715384 | 6.84E-07 | 2.51E-06 | 520 | 520 |
| PEF1      | -0.215754989 | 6.81E-07 | 2.50E-06 | 520 | 520 |
| JTB       | -0.215843122 | 6.74E-07 | 2.47E-06 | 520 | 520 |
| FOXE1     | -0.215849348 | 6.73E-07 | 2.47E-06 | 520 | 519 |
| PILRB     | -0.216017185 | 6.59E-07 | 2.42E-06 | 520 | 520 |



|           |              |          |          |     |     |
|-----------|--------------|----------|----------|-----|-----|
| EPB49     | -0.216308954 | 6.36E-07 | 2.34E-06 | 520 | 520 |
| TFB1M     | -0.216353556 | 6.33E-07 | 2.33E-06 | 520 | 520 |
| NPEPPS    | -0.216359022 | 6.33E-07 | 2.33E-06 | 520 | 520 |
| MORN3     | -0.216419792 | 6.28E-07 | 2.31E-06 | 520 | 518 |
| NDUFA4    | -0.216456722 | 6.25E-07 | 2.30E-06 | 520 | 520 |
| HEXDC     | -0.21646708  | 6.24E-07 | 2.30E-06 | 520 | 520 |
| UTP11L    | -0.216477889 | 6.23E-07 | 2.30E-06 | 520 | 520 |
| HNRNPD    | -0.216501187 | 6.22E-07 | 2.29E-06 | 520 | 520 |
| AAGAB     | -0.216512486 | 6.21E-07 | 2.29E-06 | 520 | 520 |
| CHTF18    | -0.216663986 | 6.10E-07 | 2.25E-06 | 520 | 520 |
| GSTZ1     | -0.216664105 | 6.09E-07 | 2.25E-06 | 520 | 520 |
| C1orf131  | -0.216674082 | 6.09E-07 | 2.25E-06 | 520 | 520 |
| TMEM134   | -0.216768643 | 6.02E-07 | 2.22E-06 | 520 | 520 |
| ESPN      | -0.216802742 | 5.99E-07 | 2.21E-06 | 520 | 520 |
| LSM12     | -0.216821017 | 5.98E-07 | 2.21E-06 | 520 | 520 |
| LSMD1     | -0.216856854 | 5.95E-07 | 2.20E-06 | 520 | 520 |
| APRT      | -0.216857797 | 5.95E-07 | 2.20E-06 | 520 | 520 |
| GRID2IP   | -0.216863946 | 5.95E-07 | 2.20E-06 | 520 | 493 |
| METT11D1  | -0.216871419 | 5.94E-07 | 2.20E-06 | 520 | 520 |
| COQ5      | -0.216931101 | 5.90E-07 | 2.18E-06 | 520 | 520 |
| RPS18     | -0.216962643 | 5.88E-07 | 2.17E-06 | 520 | 520 |
| ARMC5     | -0.216992311 | 5.86E-07 | 2.17E-06 | 520 | 520 |
| LOC388789 | -0.216998575 | 5.85E-07 | 2.17E-06 | 520 | 520 |
| PPP1R3D   | -0.217010482 | 5.84E-07 | 2.16E-06 | 520 | 520 |
| NUDT2     | -0.217024924 | 5.83E-07 | 2.16E-06 | 520 | 520 |
| SPINT2    | -0.217041012 | 5.82E-07 | 2.16E-06 | 520 | 520 |
| C9orf78   | -0.217164476 | 5.73E-07 | 2.13E-06 | 520 | 520 |
| KLHDC7A   | -0.217183166 | 5.72E-07 | 2.12E-06 | 520 | 427 |
| SLC5A10   | -0.217183789 | 5.72E-07 | 2.12E-06 | 520 | 519 |
| RBM14     | -0.217241734 | 5.68E-07 | 2.11E-06 | 520 | 520 |
| NMI       | -0.217333142 | 5.62E-07 | 2.08E-06 | 520 | 520 |
| PGLYRP3   | -0.217360495 | 5.60E-07 | 2.08E-06 | 520 | 513 |
| ACAA1     | -0.217373616 | 5.59E-07 | 2.08E-06 | 520 | 520 |
| LOC441869 | -0.21738426  | 5.58E-07 | 2.07E-06 | 520 | 520 |
| C2orf64   | -0.217466921 | 5.53E-07 | 2.05E-06 | 520 | 520 |
| TCAM1P    | -0.217493724 | 5.51E-07 | 2.05E-06 | 520 | 436 |
| HIGD1A    | -0.21755244  | 5.47E-07 | 2.03E-06 | 520 | 520 |
| KCNK1     | -0.217565148 | 5.46E-07 | 2.03E-06 | 520 | 520 |
| RPL29     | -0.217569323 | 5.46E-07 | 2.03E-06 | 520 | 520 |
| RPA3      | -0.217577233 | 5.45E-07 | 2.03E-06 | 520 | 520 |
| IKBKG     | -0.217591091 | 5.44E-07 | 2.02E-06 | 520 | 520 |
| NAA10     | -0.217600487 | 5.44E-07 | 2.02E-06 | 520 | 520 |
| CMC1      | -0.21763485  | 5.41E-07 | 2.01E-06 | 520 | 520 |
| HSD11B2   | -0.21766211  | 5.39E-07 | 2.01E-06 | 520 | 520 |
| SAT1      | -0.217736923 | 5.35E-07 | 1.99E-06 | 520 | 520 |
| EXOSC8    | -0.21775787  | 5.33E-07 | 1.99E-06 | 520 | 520 |

|              |              |          |          |     |     |
|--------------|--------------|----------|----------|-----|-----|
| TNFRSF18     | -0.217764693 | 5.33E-07 | 1.98E-06 | 520 | 520 |
| TMIE         | -0.217774771 | 5.32E-07 | 1.98E-06 | 520 | 519 |
| C9orf9       | -0.217817249 | 5.29E-07 | 1.97E-06 | 520 | 520 |
| CYP2F1       | -0.217819076 | 5.29E-07 | 1.97E-06 | 520 | 264 |
| ZFR2         | -0.217864316 | 5.26E-07 | 1.96E-06 | 520 | 406 |
| CCDC130      | -0.217903526 | 5.24E-07 | 1.95E-06 | 520 | 520 |
| CD9          | -0.218092891 | 5.12E-07 | 1.91E-06 | 520 | 520 |
| MCEE         | -0.218161382 | 5.07E-07 | 1.89E-06 | 520 | 520 |
| ATP5A1       | -0.218212322 | 5.04E-07 | 1.88E-06 | 520 | 520 |
| NDUFS6       | -0.218214684 | 5.04E-07 | 1.88E-06 | 520 | 520 |
| PTRH2        | -0.218228422 | 5.03E-07 | 1.88E-06 | 520 | 520 |
| ESRP1        | -0.218275334 | 5.00E-07 | 1.87E-06 | 520 | 519 |
| SDHAF1       | -0.218284173 | 5.00E-07 | 1.87E-06 | 520 | 520 |
| TST          | -0.218411866 | 4.92E-07 | 1.84E-06 | 520 | 520 |
| DDX39        | -0.218425986 | 4.91E-07 | 1.84E-06 | 520 | 520 |
| RWDD4A       | -0.218485592 | 4.88E-07 | 1.83E-06 | 520 | 520 |
| LIG1         | -0.218592964 | 4.81E-07 | 1.80E-06 | 520 | 520 |
| EHF          | -0.218605884 | 4.80E-07 | 1.80E-06 | 520 | 519 |
| CEMP1        | -0.218651452 | 4.78E-07 | 1.79E-06 | 520 | 520 |
| INA          | -0.218652479 | 4.78E-07 | 1.79E-06 | 520 | 449 |
| ZNF593       | -0.218755313 | 4.72E-07 | 1.77E-06 | 520 | 520 |
| CLTB         | -0.218778863 | 4.70E-07 | 1.76E-06 | 520 | 520 |
| TSEN2        | -0.218784746 | 4.70E-07 | 1.76E-06 | 520 | 520 |
| ASB6         | -0.218806316 | 4.69E-07 | 1.76E-06 | 520 | 520 |
| ABHD11       | -0.218932588 | 4.61E-07 | 1.73E-06 | 520 | 520 |
| LOC100128822 | -0.219012247 | 4.57E-07 | 1.72E-06 | 520 | 520 |
| RNF222       | -0.219028616 | 4.56E-07 | 1.71E-06 | 520 | 512 |
| C14orf176    | -0.219029141 | 4.56E-07 | 1.71E-06 | 520 | 520 |
| LASS3        | -0.219051691 | 4.55E-07 | 1.71E-06 | 520 | 520 |
| KCNK7        | -0.219086578 | 4.53E-07 | 1.70E-06 | 520 | 520 |
| MYO1H        | -0.219117522 | 4.51E-07 | 1.70E-06 | 520 | 499 |
| PEBP1        | -0.2191216   | 4.51E-07 | 1.70E-06 | 520 | 520 |
| PTK6         | -0.219132057 | 4.50E-07 | 1.69E-06 | 520 | 520 |
| RPL17        | -0.219134494 | 4.50E-07 | 1.69E-06 | 520 | 520 |
| PLAC2        | -0.219157698 | 4.49E-07 | 1.69E-06 | 520 | 520 |
| ARGLU1       | -0.219168768 | 4.48E-07 | 1.69E-06 | 520 | 520 |
| NAPRT1       | -0.219175292 | 4.48E-07 | 1.69E-06 | 520 | 520 |
| RPS12        | -0.219192887 | 4.47E-07 | 1.68E-06 | 520 | 520 |
| SH3D20       | -0.219258698 | 4.43E-07 | 1.67E-06 | 520 | 520 |
| AKR7L        | -0.219269847 | 4.43E-07 | 1.67E-06 | 520 | 517 |
| MGC57346     | -0.21928574  | 4.42E-07 | 1.67E-06 | 520 | 520 |
| KLF3         | -0.21928734  | 4.42E-07 | 1.67E-06 | 520 | 520 |
| CALML3       | -0.219462065 | 4.32E-07 | 1.63E-06 | 520 | 520 |
| PRR13        | -0.219532998 | 4.28E-07 | 1.62E-06 | 520 | 520 |
| UBXN11       | -0.219546985 | 4.28E-07 | 1.61E-06 | 520 | 520 |
| C21orf129    | -0.21956005  | 4.27E-07 | 1.61E-06 | 520 | 412 |

|              |              |          |          |     |     |
|--------------|--------------|----------|----------|-----|-----|
| TRAF2        | -0.219617625 | 4.24E-07 | 1.60E-06 | 520 | 520 |
| RPL5         | -0.219698037 | 4.20E-07 | 1.59E-06 | 520 | 520 |
| TMEM93       | -0.219731777 | 4.18E-07 | 1.58E-06 | 520 | 520 |
| PPP1R13B     | -0.219788171 | 4.15E-07 | 1.57E-06 | 520 | 520 |
| SLC23A1      | -0.219824781 | 4.13E-07 | 1.56E-06 | 520 | 503 |
| NCRNA00105   | -0.219989474 | 4.05E-07 | 1.53E-06 | 520 | 520 |
| AMY2A        | -0.220033393 | 4.03E-07 | 1.52E-06 | 520 | 269 |
| UBE2I        | -0.220040823 | 4.02E-07 | 1.52E-06 | 520 | 520 |
| SPIRE2       | -0.220072131 | 4.01E-07 | 1.52E-06 | 520 | 520 |
| FTLP10       | -0.220150581 | 3.97E-07 | 1.50E-06 | 520 | 78  |
| HRASLS2      | -0.220245486 | 3.92E-07 | 1.49E-06 | 520 | 513 |
| MOBK13       | -0.220309499 | 3.89E-07 | 1.48E-06 | 520 | 520 |
| OAZ1         | -0.220338979 | 3.88E-07 | 1.47E-06 | 520 | 520 |
| AMIGO3       | -0.22041229  | 3.84E-07 | 1.46E-06 | 520 | 520 |
| SERPIN4      | -0.220424617 | 3.84E-07 | 1.46E-06 | 520 | 520 |
| FOXJ1        | -0.22063765  | 3.74E-07 | 1.42E-06 | 520 | 436 |
| TRIP4        | -0.220688055 | 3.71E-07 | 1.41E-06 | 520 | 520 |
| SFRS6        | -0.220725366 | 3.69E-07 | 1.41E-06 | 520 | 520 |
| LOC202781    | -0.220797366 | 3.66E-07 | 1.39E-06 | 520 | 520 |
| ALKBH2       | -0.220799185 | 3.66E-07 | 1.39E-06 | 520 | 520 |
| PSMC6        | -0.220805887 | 3.66E-07 | 1.39E-06 | 520 | 520 |
| EXOSC9       | -0.220858822 | 3.63E-07 | 1.38E-06 | 520 | 520 |
| RNF7         | -0.220888944 | 3.62E-07 | 1.38E-06 | 520 | 520 |
| VPS4B        | -0.220970714 | 3.58E-07 | 1.37E-06 | 520 | 520 |
| LOC100132287 | -0.221003357 | 3.57E-07 | 1.36E-06 | 520 | 520 |
| GIYD2        | -0.221003731 | 3.57E-07 | 1.36E-06 | 520 | 520 |
| GET4         | -0.221063488 | 3.54E-07 | 1.35E-06 | 520 | 520 |
| C20orf11     | -0.221086307 | 3.53E-07 | 1.35E-06 | 520 | 520 |
| SRA1         | -0.221096376 | 3.53E-07 | 1.35E-06 | 520 | 520 |
| AGER         | -0.221154962 | 3.50E-07 | 1.34E-06 | 520 | 520 |
| PSMB1        | -0.221246068 | 3.46E-07 | 1.32E-06 | 520 | 520 |
| NDC80        | -0.221287049 | 3.45E-07 | 1.32E-06 | 520 | 520 |
| C16orf79     | -0.221287695 | 3.44E-07 | 1.32E-06 | 520 | 519 |
| NRARP        | -0.221306321 | 3.44E-07 | 1.32E-06 | 520 | 520 |
| TLX3         | -0.221342985 | 3.42E-07 | 1.31E-06 | 520 | 216 |
| MRPS24       | -0.221577071 | 3.32E-07 | 1.27E-06 | 520 | 520 |
| NDUFS2       | -0.221598252 | 3.31E-07 | 1.27E-06 | 520 | 520 |
| RUFY3        | -0.221614056 | 3.31E-07 | 1.27E-06 | 520 | 520 |
| SGPP2        | -0.221747699 | 3.25E-07 | 1.25E-06 | 520 | 520 |
| RIOK1        | -0.221914701 | 3.19E-07 | 1.22E-06 | 520 | 520 |
| TRIM31       | -0.222023588 | 3.14E-07 | 1.21E-06 | 520 | 502 |
| LDHD         | -0.222171094 | 3.08E-07 | 1.19E-06 | 520 | 520 |
| TOR2A        | -0.222175829 | 3.08E-07 | 1.19E-06 | 520 | 520 |
| HSF4         | -0.222217812 | 3.07E-07 | 1.18E-06 | 520 | 520 |
| SCYL3        | -0.222299853 | 3.04E-07 | 1.17E-06 | 520 | 520 |
| CCNB1        | -0.22231374  | 3.03E-07 | 1.17E-06 | 520 | 520 |

|              |              |          |          |     |     |
|--------------|--------------|----------|----------|-----|-----|
| RPL27A       | -0.222341195 | 3.02E-07 | 1.16E-06 | 520 | 520 |
| LYPD5        | -0.222413043 | 2.99E-07 | 1.15E-06 | 520 | 520 |
| ECH1         | -0.222447261 | 2.98E-07 | 1.15E-06 | 520 | 520 |
| CYP4Z1       | -0.222543603 | 2.94E-07 | 1.14E-06 | 520 | 329 |
| TLX2         | -0.222568316 | 2.93E-07 | 1.13E-06 | 520 | 422 |
| MED4         | -0.222670917 | 2.90E-07 | 1.12E-06 | 520 | 520 |
| ZPBP2        | -0.222823261 | 2.84E-07 | 1.10E-06 | 520 | 127 |
| ZNF212       | -0.222888285 | 2.82E-07 | 1.09E-06 | 520 | 520 |
| JUNB         | -0.22288987  | 2.82E-07 | 1.09E-06 | 520 | 520 |
| SYCP2        | -0.222948156 | 2.80E-07 | 1.08E-06 | 520 | 519 |
| DONSON       | -0.222977251 | 2.79E-07 | 1.08E-06 | 520 | 520 |
| SNRPD2       | -0.222989134 | 2.78E-07 | 1.08E-06 | 520 | 520 |
| CXXC1        | -0.223032301 | 2.77E-07 | 1.07E-06 | 520 | 520 |
| CHCHD4       | -0.223037204 | 2.77E-07 | 1.07E-06 | 520 | 520 |
| RPUSD1       | -0.223044938 | 2.76E-07 | 1.07E-06 | 520 | 520 |
| SQRDL        | -0.223064173 | 2.76E-07 | 1.07E-06 | 520 | 520 |
| PSORS1C2     | -0.223274858 | 2.69E-07 | 1.04E-06 | 520 | 510 |
| PSMG3        | -0.22334656  | 2.66E-07 | 1.03E-06 | 520 | 520 |
| ILKAP        | -0.223440676 | 2.63E-07 | 1.02E-06 | 520 | 520 |
| LOC728758    | -0.223461145 | 2.62E-07 | 1.02E-06 | 520 | 520 |
| AACSL        | -0.22347725  | 2.62E-07 | 1.02E-06 | 520 | 444 |
| RNF8         | -0.223539453 | 2.60E-07 | 1.01E-06 | 520 | 520 |
| C1orf63      | -0.223565622 | 2.59E-07 | 1.01E-06 | 520 | 520 |
| INO80E       | -0.223601878 | 2.58E-07 | 1.00E-06 | 520 | 520 |
| ZNF589       | -0.223626656 | 2.57E-07 | 9.98E-07 | 520 | 520 |
| TIMM17B      | -0.223662941 | 2.56E-07 | 9.94E-07 | 520 | 520 |
| DDX12        | -0.223693723 | 2.55E-07 | 9.90E-07 | 520 | 520 |
| C9orf100     | -0.223749942 | 2.53E-07 | 9.84E-07 | 520 | 520 |
| PRSS36       | -0.223896821 | 2.48E-07 | 9.66E-07 | 520 | 520 |
| LOC150776    | -0.223926576 | 2.47E-07 | 9.63E-07 | 520 | 520 |
| LOC100133161 | -0.223956531 | 2.46E-07 | 9.60E-07 | 520 | 519 |
| C19orf73     | -0.223960156 | 2.46E-07 | 9.60E-07 | 520 | 520 |
| VSIG10L      | -0.223971111 | 2.46E-07 | 9.58E-07 | 520 | 520 |
| SLC23A3      | -0.223982291 | 2.46E-07 | 9.57E-07 | 520 | 514 |
| PRDM15       | -0.223985644 | 2.46E-07 | 9.57E-07 | 520 | 520 |
| TRIM74       | -0.224052838 | 2.43E-07 | 9.49E-07 | 520 | 442 |
| BRAP         | -0.224069566 | 2.43E-07 | 9.48E-07 | 520 | 520 |
| GABRE        | -0.224087201 | 2.42E-07 | 9.46E-07 | 520 | 520 |
| NANS         | -0.224088416 | 2.42E-07 | 9.46E-07 | 520 | 520 |
| RFXANK       | -0.224140168 | 2.41E-07 | 9.40E-07 | 520 | 520 |
| DNAJC17      | -0.224144261 | 2.41E-07 | 9.40E-07 | 520 | 520 |
| C1orf31      | -0.224177085 | 2.40E-07 | 9.36E-07 | 520 | 520 |
| ARHGEF37     | -0.224205867 | 2.39E-07 | 9.33E-07 | 520 | 520 |
| ANKRD16      | -0.224211364 | 2.39E-07 | 9.33E-07 | 520 | 520 |
| RPL19        | -0.224222498 | 2.38E-07 | 9.32E-07 | 520 | 520 |
| CLN6         | -0.224350577 | 2.34E-07 | 9.18E-07 | 520 | 520 |

|              |              |          |          |     |     |
|--------------|--------------|----------|----------|-----|-----|
| EPB41L4A     | -0.224380328 | 2.34E-07 | 9.14E-07 | 520 | 520 |
| GINS2        | -0.22440851  | 2.33E-07 | 9.11E-07 | 520 | 520 |
| DNAJC8       | -0.224441579 | 2.32E-07 | 9.08E-07 | 520 | 520 |
| PSMB2        | -0.22452348  | 2.29E-07 | 8.99E-07 | 520 | 520 |
| SCNM1        | -0.2246814   | 2.25E-07 | 8.82E-07 | 520 | 520 |
| ARL6IP4      | -0.224774819 | 2.22E-07 | 8.71E-07 | 520 | 520 |
| PDF          | -0.224850187 | 2.20E-07 | 8.64E-07 | 520 | 520 |
| RBP7         | -0.224850495 | 2.20E-07 | 8.64E-07 | 520 | 520 |
| RALGDS       | -0.224869865 | 2.20E-07 | 8.62E-07 | 520 | 520 |
| PDCD5        | -0.224876678 | 2.19E-07 | 8.62E-07 | 520 | 520 |
| KIN          | -0.224876695 | 2.19E-07 | 8.62E-07 | 520 | 520 |
| LOC100129637 | -0.224891266 | 2.19E-07 | 8.60E-07 | 520 | 520 |
| CTAGE9       | -0.224966784 | 2.17E-07 | 8.52E-07 | 520 | 520 |
| ZNF511       | -0.225121542 | 2.13E-07 | 8.37E-07 | 520 | 520 |
| PSMD4        | -0.225133591 | 2.12E-07 | 8.36E-07 | 520 | 520 |
| CUL9         | -0.225188532 | 2.11E-07 | 8.30E-07 | 520 | 520 |
| ALDH5A1      | -0.225205951 | 2.10E-07 | 8.28E-07 | 520 | 520 |
| CCNB2        | -0.225242648 | 2.09E-07 | 8.25E-07 | 520 | 520 |
| TOMM40       | -0.225267324 | 2.09E-07 | 8.22E-07 | 520 | 520 |
| B3GNT6       | -0.225311728 | 2.08E-07 | 8.18E-07 | 520 | 367 |
| RPLP0        | -0.225434495 | 2.04E-07 | 8.06E-07 | 520 | 520 |
| SUSD4        | -0.225580139 | 2.01E-07 | 7.91E-07 | 520 | 520 |
| LOC100127888 | -0.225597955 | 2.00E-07 | 7.90E-07 | 520 | 480 |
| C6orf47      | -0.225675977 | 1.98E-07 | 7.82E-07 | 520 | 520 |
| AGAP4        | -0.225685167 | 1.98E-07 | 7.82E-07 | 520 | 520 |
| THUMPD2      | -0.225755543 | 1.96E-07 | 7.75E-07 | 520 | 520 |
| CCNL2        | -0.225800487 | 1.95E-07 | 7.71E-07 | 520 | 520 |
| MAP3K8       | -0.225901311 | 1.93E-07 | 7.61E-07 | 520 | 520 |
| LOC440461    | -0.225930669 | 1.92E-07 | 7.59E-07 | 520 | 499 |
| ROBLD3       | -0.225932019 | 1.92E-07 | 7.59E-07 | 520 | 520 |
| SERPINB3     | -0.225935362 | 1.92E-07 | 7.59E-07 | 520 | 518 |
| TREX2        | -0.225951496 | 1.91E-07 | 7.57E-07 | 520 | 517 |
| C19orf46     | -0.225988747 | 1.90E-07 | 7.54E-07 | 520 | 486 |
| NPFF         | -0.226040506 | 1.89E-07 | 7.49E-07 | 520 | 516 |
| CASP10       | -0.226052149 | 1.89E-07 | 7.48E-07 | 520 | 520 |
| WDR49        | -0.226084098 | 1.88E-07 | 7.45E-07 | 520 | 350 |
| PSD4         | -0.226095896 | 1.88E-07 | 7.44E-07 | 520 | 520 |
| GLOD4        | -0.226125358 | 1.87E-07 | 7.42E-07 | 520 | 520 |
| RAD51C       | -0.226158037 | 1.86E-07 | 7.39E-07 | 520 | 520 |
| LOC100128191 | -0.226179573 | 1.86E-07 | 7.37E-07 | 520 | 520 |
| PSMC3IP      | -0.226210481 | 1.85E-07 | 7.34E-07 | 520 | 520 |
| TIMM10       | -0.226287959 | 1.83E-07 | 7.27E-07 | 520 | 520 |
| TARBP2       | -0.22631658  | 1.83E-07 | 7.25E-07 | 520 | 520 |
| PIN4         | -0.2263279   | 1.82E-07 | 7.24E-07 | 520 | 520 |
| C8orf73      | -0.226390175 | 1.81E-07 | 7.19E-07 | 520 | 520 |
| NEBL         | -0.226398509 | 1.81E-07 | 7.18E-07 | 520 | 520 |

|           |              |          |          |     |     |
|-----------|--------------|----------|----------|-----|-----|
| FBXO6     | -0.226402019 | 1.81E-07 | 7.18E-07 | 520 | 520 |
| MED6      | -0.226425122 | 1.80E-07 | 7.16E-07 | 520 | 520 |
| THOC4     | -0.226494629 | 1.79E-07 | 7.10E-07 | 520 | 520 |
| CDAN1     | -0.226509584 | 1.78E-07 | 7.09E-07 | 520 | 520 |
| SNHG9     | -0.226539135 | 1.77E-07 | 7.07E-07 | 520 | 520 |
| CRISP3    | -0.226549269 | 1.77E-07 | 7.06E-07 | 520 | 436 |
| ATG4B     | -0.226629254 | 1.75E-07 | 6.99E-07 | 520 | 520 |
| TMEM199   | -0.226844055 | 1.71E-07 | 6.81E-07 | 520 | 520 |
| ALOX12    | -0.22684895  | 1.71E-07 | 6.80E-07 | 520 | 519 |
| UQCRB     | -0.226864496 | 1.70E-07 | 6.79E-07 | 520 | 520 |
| SLC16A9   | -0.226875127 | 1.70E-07 | 6.78E-07 | 520 | 520 |
| S100A2    | -0.226916381 | 1.69E-07 | 6.75E-07 | 520 | 520 |
| POLE      | -0.22716666  | 1.64E-07 | 6.55E-07 | 520 | 520 |
| RPS16     | -0.227265616 | 1.62E-07 | 6.47E-07 | 520 | 520 |
| DHRS9     | -0.227323795 | 1.61E-07 | 6.43E-07 | 520 | 520 |
| ACTR6     | -0.227386822 | 1.59E-07 | 6.38E-07 | 520 | 520 |
| GPR109A   | -0.227430807 | 1.58E-07 | 6.34E-07 | 520 | 520 |
| CDCA2     | -0.227433187 | 1.58E-07 | 6.34E-07 | 520 | 520 |
| MTG1      | -0.227584713 | 1.55E-07 | 6.22E-07 | 520 | 520 |
| MAX       | -0.227664185 | 1.54E-07 | 6.16E-07 | 520 | 520 |
| TMCO6     | -0.227718517 | 1.53E-07 | 6.12E-07 | 520 | 520 |
| HAUS5     | -0.227719086 | 1.53E-07 | 6.12E-07 | 520 | 520 |
| TMEM69    | -0.227720498 | 1.53E-07 | 6.12E-07 | 520 | 520 |
| HNRNPA3P1 | -0.227722403 | 1.53E-07 | 6.12E-07 | 520 | 520 |
| GEMIN7    | -0.227874624 | 1.50E-07 | 6.01E-07 | 520 | 520 |
| PARL      | -0.227955407 | 1.48E-07 | 5.95E-07 | 520 | 520 |
| ATP13A5   | -0.228013417 | 1.47E-07 | 5.91E-07 | 520 | 382 |
| CCDC90A   | -0.22804865  | 1.46E-07 | 5.88E-07 | 520 | 520 |
| SPDYE8P   | -0.228083904 | 1.46E-07 | 5.86E-07 | 520 | 520 |
| ERP29     | -0.228106683 | 1.45E-07 | 5.84E-07 | 520 | 520 |
| TTYH1     | -0.228122703 | 1.45E-07 | 5.83E-07 | 520 | 517 |
| NLRP9     | -0.228316909 | 1.41E-07 | 5.69E-07 | 520 | 430 |
| PUSL1     | -0.228321088 | 1.41E-07 | 5.69E-07 | 520 | 520 |
| ESPL1     | -0.228558123 | 1.37E-07 | 5.53E-07 | 520 | 520 |
| CYP2D7P1  | -0.228573324 | 1.37E-07 | 5.52E-07 | 520 | 517 |
| TOLLIP    | -0.228611306 | 1.36E-07 | 5.49E-07 | 520 | 520 |
| C9orf16   | -0.228767377 | 1.33E-07 | 5.39E-07 | 520 | 520 |
| FUS       | -0.228829437 | 1.32E-07 | 5.35E-07 | 520 | 520 |
| C5orf60   | -0.228882014 | 1.31E-07 | 5.31E-07 | 520 | 277 |
| C15orf41  | -0.22888731  | 1.31E-07 | 5.31E-07 | 520 | 520 |
| MRPS6     | -0.229118181 | 1.27E-07 | 5.16E-07 | 520 | 520 |
| C8orf59   | -0.229134009 | 1.27E-07 | 5.15E-07 | 520 | 520 |
| EIF2B1    | -0.229144655 | 1.27E-07 | 5.15E-07 | 520 | 520 |
| C9orf69   | -0.229311097 | 1.24E-07 | 5.04E-07 | 520 | 520 |
| LSM7      | -0.229371839 | 1.23E-07 | 5.00E-07 | 520 | 520 |
| ANAPC16   | -0.229417037 | 1.23E-07 | 4.98E-07 | 520 | 520 |

|           |              |          |          |     |     |
|-----------|--------------|----------|----------|-----|-----|
| CEBPD     | -0.229428931 | 1.22E-07 | 4.97E-07 | 520 | 520 |
| THOP1     | -0.229478964 | 1.22E-07 | 4.94E-07 | 520 | 520 |
| SDR39U1   | -0.229538914 | 1.21E-07 | 4.90E-07 | 520 | 520 |
| RPS10P7   | -0.229560586 | 1.20E-07 | 4.89E-07 | 520 | 520 |
| WDR77     | -0.229587751 | 1.20E-07 | 4.88E-07 | 520 | 520 |
| ARMC7     | -0.229598393 | 1.20E-07 | 4.87E-07 | 520 | 520 |
| BCMO1     | -0.229691736 | 1.18E-07 | 4.81E-07 | 520 | 485 |
| CDC7      | -0.229814626 | 1.16E-07 | 4.74E-07 | 520 | 520 |
| PMS2L11   | -0.229827546 | 1.16E-07 | 4.74E-07 | 520 | 520 |
| ARSH      | -0.22983328  | 1.16E-07 | 4.73E-07 | 520 | 319 |
| MYH14     | -0.229855611 | 1.16E-07 | 4.72E-07 | 520 | 520 |
| RAD54L    | -0.229863203 | 1.16E-07 | 4.72E-07 | 520 | 520 |
| LOC440944 | -0.22987914  | 1.15E-07 | 4.71E-07 | 520 | 520 |
| GRAMD4    | -0.229907157 | 1.15E-07 | 4.70E-07 | 520 | 520 |
| ANKRD56   | -0.230020118 | 1.13E-07 | 4.63E-07 | 520 | 518 |
| LIAS      | -0.230085645 | 1.12E-07 | 4.59E-07 | 520 | 520 |
| RABEP2    | -0.230123006 | 1.12E-07 | 4.57E-07 | 520 | 520 |
| GLS2      | -0.230212873 | 1.11E-07 | 4.52E-07 | 520 | 520 |
| MINA      | -0.230244692 | 1.10E-07 | 4.51E-07 | 520 | 520 |
| C4orf19   | -0.230300831 | 1.09E-07 | 4.47E-07 | 520 | 512 |
| UQCR11    | -0.230426034 | 1.08E-07 | 4.40E-07 | 520 | 520 |
| PSMA2     | -0.230448544 | 1.07E-07 | 4.39E-07 | 520 | 520 |
| ACP1      | -0.230524692 | 1.06E-07 | 4.35E-07 | 520 | 520 |
| TTC18     | -0.230528262 | 1.06E-07 | 4.35E-07 | 520 | 520 |
| BRP44     | -0.230579289 | 1.05E-07 | 4.32E-07 | 520 | 520 |
| FAM128B   | -0.230616139 | 1.05E-07 | 4.30E-07 | 520 | 520 |
| SELK      | -0.230650434 | 1.04E-07 | 4.28E-07 | 520 | 520 |
| IGSF9     | -0.230668074 | 1.04E-07 | 4.28E-07 | 520 | 520 |
| EBNA1BP2  | -0.230676396 | 1.04E-07 | 4.27E-07 | 520 | 520 |
| USP6NL    | -0.230727851 | 1.03E-07 | 4.25E-07 | 520 | 520 |
| SNX24     | -0.230762351 | 1.03E-07 | 4.23E-07 | 520 | 520 |
| PSME2     | -0.230812818 | 1.02E-07 | 4.20E-07 | 520 | 520 |
| BTG3      | -0.230894292 | 1.01E-07 | 4.16E-07 | 520 | 520 |
| CCDC24    | -0.230918605 | 1.01E-07 | 4.15E-07 | 520 | 520 |
| DCTN6     | -0.230960148 | 1.00E-07 | 4.13E-07 | 520 | 520 |
| TTC32     | -0.23101667  | 9.95E-08 | 4.10E-07 | 520 | 520 |
| PICK1     | -0.231030762 | 9.94E-08 | 4.09E-07 | 520 | 520 |
| ATP6V0C   | -0.23104609  | 9.92E-08 | 4.09E-07 | 520 | 520 |
| AMY2B     | -0.231134161 | 9.80E-08 | 4.04E-07 | 520 | 518 |
| TRAPPC2   | -0.231206195 | 9.71E-08 | 4.01E-07 | 520 | 520 |
| FAIM      | -0.231251142 | 9.65E-08 | 3.98E-07 | 520 | 520 |
| RPL10A    | -0.231260085 | 9.64E-08 | 3.98E-07 | 520 | 520 |
| UBE2T     | -0.231317683 | 9.57E-08 | 3.95E-07 | 520 | 520 |
| PYROXD1   | -0.23132715  | 9.56E-08 | 3.95E-07 | 520 | 520 |
| NXF1      | -0.231341537 | 9.54E-08 | 3.94E-07 | 520 | 520 |
| RGS12     | -0.23146447  | 9.39E-08 | 3.88E-07 | 520 | 520 |

|           |              |          |          |     |     |
|-----------|--------------|----------|----------|-----|-----|
| HAX1      | -0.231481431 | 9.37E-08 | 3.87E-07 | 520 | 520 |
| PGD       | -0.231528197 | 9.31E-08 | 3.85E-07 | 520 | 520 |
| RPL38     | -0.231532255 | 9.31E-08 | 3.85E-07 | 520 | 520 |
| RCC1      | -0.231558197 | 9.28E-08 | 3.84E-07 | 520 | 520 |
| PKP3      | -0.231572427 | 9.26E-08 | 3.83E-07 | 520 | 520 |
| IL1F10    | -0.231574555 | 9.26E-08 | 3.83E-07 | 520 | 462 |
| LOC283404 | -0.231752526 | 9.04E-08 | 3.74E-07 | 520 | 506 |
| CEL       | -0.232012666 | 8.74E-08 | 3.62E-07 | 520 | 520 |
| DHRS7B    | -0.232043029 | 8.70E-08 | 3.61E-07 | 520 | 520 |
| LAGE3     | -0.232098959 | 8.64E-08 | 3.59E-07 | 520 | 520 |
| TOMM5     | -0.232108737 | 8.63E-08 | 3.58E-07 | 520 | 520 |
| RPL27     | -0.232120801 | 8.62E-08 | 3.58E-07 | 520 | 520 |
| CORT      | -0.232217597 | 8.51E-08 | 3.54E-07 | 520 | 495 |
| HNRNPA3   | -0.232287089 | 8.43E-08 | 3.51E-07 | 520 | 520 |
| UBQLN4    | -0.232299534 | 8.42E-08 | 3.50E-07 | 520 | 520 |
| HS3ST6    | -0.232305991 | 8.41E-08 | 3.50E-07 | 520 | 451 |
| GK5       | -0.232363275 | 8.35E-08 | 3.47E-07 | 520 | 520 |
| GOLGA8A   | -0.232400247 | 8.31E-08 | 3.46E-07 | 520 | 520 |
| SURF1     | -0.232411119 | 8.29E-08 | 3.45E-07 | 520 | 520 |
| MRPL55    | -0.232414629 | 8.29E-08 | 3.45E-07 | 520 | 520 |
| SNHG3     | -0.232473209 | 8.23E-08 | 3.43E-07 | 520 | 520 |
| RPS9      | -0.232664291 | 8.02E-08 | 3.35E-07 | 520 | 520 |
| SLC6A9    | -0.23267538  | 8.01E-08 | 3.34E-07 | 520 | 520 |
| H2AFY     | -0.23268188  | 8.00E-08 | 3.34E-07 | 520 | 520 |
| DHCR24    | -0.232710233 | 7.97E-08 | 3.33E-07 | 520 | 520 |
| WASH5P    | -0.232715068 | 7.97E-08 | 3.33E-07 | 520 | 520 |
| C21orf33  | -0.232746922 | 7.94E-08 | 3.31E-07 | 520 | 520 |
| SAP18     | -0.232855823 | 7.82E-08 | 3.27E-07 | 520 | 520 |
| CENPH     | -0.232997389 | 7.68E-08 | 3.21E-07 | 520 | 520 |
| DOLPP1    | -0.233029396 | 7.65E-08 | 3.20E-07 | 520 | 520 |
| NAPA      | -0.233029934 | 7.65E-08 | 3.20E-07 | 520 | 520 |
| ARHGEF5   | -0.233033072 | 7.64E-08 | 3.20E-07 | 520 | 520 |
| LYNX1     | -0.233066333 | 7.61E-08 | 3.19E-07 | 520 | 520 |
| NFIA      | -0.233098327 | 7.58E-08 | 3.17E-07 | 520 | 520 |
| AKR1A1    | -0.233131819 | 7.54E-08 | 3.16E-07 | 520 | 520 |
| CDK7      | -0.23314275  | 7.53E-08 | 3.16E-07 | 520 | 520 |
| CHAF1B    | -0.233217022 | 7.46E-08 | 3.13E-07 | 520 | 520 |
| LILRP2    | -0.233245718 | 7.43E-08 | 3.12E-07 | 520 | 427 |
| CCDC60    | -0.233433922 | 7.25E-08 | 3.04E-07 | 520 | 243 |
| TMEM203   | -0.233457028 | 7.23E-08 | 3.03E-07 | 520 | 520 |
| RAB10     | -0.233507982 | 7.18E-08 | 3.02E-07 | 520 | 520 |
| GTF2E2    | -0.233526342 | 7.16E-08 | 3.01E-07 | 520 | 520 |
| NDUFAF1   | -0.233608225 | 7.08E-08 | 2.98E-07 | 520 | 520 |
| C2orf79   | -0.233617307 | 7.08E-08 | 2.98E-07 | 520 | 520 |
| C1orf69   | -0.23370367  | 7.00E-08 | 2.94E-07 | 520 | 520 |
| PKP1      | -0.233906992 | 6.81E-08 | 2.87E-07 | 520 | 520 |



|              |              |          |          |     |     |
|--------------|--------------|----------|----------|-----|-----|
| RFC4         | -0.233947558 | 6.77E-08 | 2.85E-07 | 520 | 520 |
| SIAH2        | -0.233963316 | 6.76E-08 | 2.85E-07 | 520 | 520 |
| TCN1         | -0.233985736 | 6.74E-08 | 2.84E-07 | 520 | 506 |
| AACS         | -0.234126367 | 6.62E-08 | 2.79E-07 | 520 | 520 |
| PLP2         | -0.234346474 | 6.43E-08 | 2.71E-07 | 520 | 520 |
| SOD1         | -0.234377681 | 6.40E-08 | 2.70E-07 | 520 | 520 |
| MRPL24       | -0.234494757 | 6.30E-08 | 2.66E-07 | 520 | 520 |
| PPAN         | -0.234546547 | 6.26E-08 | 2.65E-07 | 520 | 520 |
| NAT1         | -0.234609048 | 6.21E-08 | 2.62E-07 | 520 | 520 |
| TMEM191A     | -0.234636751 | 6.18E-08 | 2.62E-07 | 520 | 520 |
| ZNF672       | -0.23466953  | 6.16E-08 | 2.61E-07 | 520 | 520 |
| SLC25A33     | -0.234741436 | 6.10E-08 | 2.58E-07 | 520 | 520 |
| CDC123       | -0.234929919 | 5.95E-08 | 2.52E-07 | 520 | 520 |
| GLTPD1       | -0.23498019  | 5.91E-08 | 2.50E-07 | 520 | 520 |
| PPA1         | -0.235011883 | 5.88E-08 | 2.49E-07 | 520 | 520 |
| H2AFX        | -0.23508196  | 5.83E-08 | 2.47E-07 | 520 | 520 |
| FUT1         | -0.235128515 | 5.79E-08 | 2.46E-07 | 520 | 520 |
| C17orf56     | -0.235135672 | 5.79E-08 | 2.46E-07 | 520 | 520 |
| NUP50        | -0.235168483 | 5.76E-08 | 2.45E-07 | 520 | 520 |
| ING5         | -0.235207035 | 5.73E-08 | 2.43E-07 | 520 | 520 |
| C21orf81     | -0.235361283 | 5.62E-08 | 2.39E-07 | 520 | 295 |
| CES2         | -0.235362367 | 5.62E-08 | 2.39E-07 | 520 | 520 |
| SERBP1       | -0.235415161 | 5.58E-08 | 2.37E-07 | 520 | 520 |
| FBXO9        | -0.235445738 | 5.55E-08 | 2.36E-07 | 520 | 520 |
| NCRNA00201   | -0.235521081 | 5.50E-08 | 2.34E-07 | 520 | 520 |
| PRRG4        | -0.235588585 | 5.45E-08 | 2.32E-07 | 520 | 520 |
| HNRNPL       | -0.235595742 | 5.44E-08 | 2.32E-07 | 520 | 520 |
| GTF3C6       | -0.235609578 | 5.43E-08 | 2.32E-07 | 520 | 520 |
| VPS25        | -0.235620325 | 5.43E-08 | 2.31E-07 | 520 | 520 |
| ST14         | -0.235628328 | 5.42E-08 | 2.31E-07 | 520 | 520 |
| NIT1         | -0.235665931 | 5.39E-08 | 2.30E-07 | 520 | 520 |
| RAD51        | -0.235696645 | 5.37E-08 | 2.29E-07 | 520 | 520 |
| LOC100130015 | -0.235718203 | 5.36E-08 | 2.28E-07 | 520 | 518 |
| MRPL14       | -0.23575561  | 5.33E-08 | 2.27E-07 | 520 | 520 |
| MRPL13       | -0.235830694 | 5.28E-08 | 2.25E-07 | 520 | 520 |
| PRPF39       | -0.235838602 | 5.27E-08 | 2.25E-07 | 520 | 520 |
| C1orf161     | -0.235840367 | 5.27E-08 | 2.25E-07 | 520 | 515 |
| WDR90        | -0.235860834 | 5.25E-08 | 2.25E-07 | 520 | 520 |
| ACAP3        | -0.235871616 | 5.25E-08 | 2.24E-07 | 520 | 520 |
| TAF11        | -0.235917835 | 5.21E-08 | 2.23E-07 | 520 | 520 |
| CHEK2        | -0.235917867 | 5.21E-08 | 2.23E-07 | 520 | 520 |
| KRTAP5-9     | -0.235981041 | 5.17E-08 | 2.21E-07 | 520 | 447 |
| IMMP1L       | -0.236007767 | 5.15E-08 | 2.20E-07 | 520 | 520 |
| HSD17B7      | -0.236016772 | 5.15E-08 | 2.20E-07 | 520 | 520 |
| SPRR2B       | -0.236079625 | 5.10E-08 | 2.18E-07 | 520 | 506 |
| C15orf56     | -0.236378025 | 4.90E-08 | 2.10E-07 | 520 | 430 |

|           |              |          |          |     |     |
|-----------|--------------|----------|----------|-----|-----|
| VNN1      | -0.23638075  | 4.90E-08 | 2.10E-07 | 520 | 520 |
| PCYT2     | -0.236458528 | 4.85E-08 | 2.08E-07 | 520 | 520 |
| CAPN12    | -0.236538532 | 4.80E-08 | 2.06E-07 | 520 | 520 |
| PPCS      | -0.236604025 | 4.76E-08 | 2.04E-07 | 520 | 520 |
| C1orf113  | -0.236709334 | 4.69E-08 | 2.01E-07 | 520 | 520 |
| MRPL42    | -0.236763591 | 4.66E-08 | 2.00E-07 | 520 | 520 |
| SULT1A3   | -0.236787556 | 4.64E-08 | 1.99E-07 | 520 | 520 |
| PPAP2C    | -0.23680753  | 4.63E-08 | 1.99E-07 | 520 | 520 |
| GMDS      | -0.236865441 | 4.59E-08 | 1.97E-07 | 520 | 520 |
| CCDC85C   | -0.23692999  | 4.55E-08 | 1.96E-07 | 520 | 520 |
| LOC148709 | -0.236982569 | 4.52E-08 | 1.95E-07 | 520 | 483 |
| MCCC1     | -0.237067694 | 4.47E-08 | 1.93E-07 | 520 | 520 |
| TIMM44    | -0.237083155 | 4.46E-08 | 1.92E-07 | 520 | 520 |
| EPN3      | -0.237115073 | 4.44E-08 | 1.91E-07 | 520 | 519 |
| HMSD      | -0.237122205 | 4.44E-08 | 1.91E-07 | 520 | 496 |
| ACPP      | -0.237123092 | 4.44E-08 | 1.91E-07 | 520 | 520 |
| TAF15     | -0.237419187 | 4.27E-08 | 1.84E-07 | 520 | 520 |
| MRPS7     | -0.237420295 | 4.26E-08 | 1.84E-07 | 520 | 520 |
| HDGF      | -0.237469392 | 4.24E-08 | 1.83E-07 | 520 | 520 |
| MRPS33    | -0.237481822 | 4.23E-08 | 1.83E-07 | 520 | 520 |
| LOC401052 | -0.237535995 | 4.20E-08 | 1.82E-07 | 520 | 520 |
| ZC3H8     | -0.237553059 | 4.19E-08 | 1.81E-07 | 520 | 520 |
| RPL32     | -0.23762399  | 4.15E-08 | 1.80E-07 | 520 | 520 |
| SCNN1G    | -0.237635003 | 4.14E-08 | 1.79E-07 | 520 | 518 |
| POC1A     | -0.237655193 | 4.13E-08 | 1.79E-07 | 520 | 520 |
| B3GNT8    | -0.237824342 | 4.04E-08 | 1.75E-07 | 520 | 520 |
| RPL37A    | -0.237846299 | 4.03E-08 | 1.75E-07 | 520 | 520 |
| PINX1     | -0.237885853 | 4.01E-08 | 1.74E-07 | 520 | 520 |
| STK38     | -0.237966276 | 3.96E-08 | 1.72E-07 | 520 | 520 |
| WDR5      | -0.237998337 | 3.95E-08 | 1.71E-07 | 520 | 520 |
| AIPL1     | -0.238051707 | 3.92E-08 | 1.70E-07 | 520 | 336 |
| GNRHR2    | -0.238088056 | 3.90E-08 | 1.69E-07 | 520 | 520 |
| CCDC94    | -0.238365029 | 3.76E-08 | 1.63E-07 | 520 | 520 |
| SLC27A4   | -0.238365257 | 3.76E-08 | 1.63E-07 | 520 | 520 |
| PCP2      | -0.238433247 | 3.72E-08 | 1.62E-07 | 520 | 461 |
| POLR1C    | -0.238546867 | 3.66E-08 | 1.60E-07 | 520 | 520 |
| SDHAP2    | -0.238587379 | 3.64E-08 | 1.59E-07 | 520 | 520 |
| RPL26L1   | -0.238618555 | 3.63E-08 | 1.58E-07 | 520 | 520 |
| EGFL8     | -0.238626648 | 3.63E-08 | 1.58E-07 | 520 | 520 |
| PARD6B    | -0.238758    | 3.56E-08 | 1.55E-07 | 520 | 520 |
| SPRYD4    | -0.238859241 | 3.51E-08 | 1.53E-07 | 520 | 520 |
| VDAC3     | -0.238892014 | 3.50E-08 | 1.53E-07 | 520 | 520 |
| UPF3B     | -0.238902085 | 3.49E-08 | 1.53E-07 | 520 | 520 |
| SFRS9     | -0.23904265  | 3.43E-08 | 1.50E-07 | 520 | 520 |
| BRCC3     | -0.239044713 | 3.43E-08 | 1.50E-07 | 520 | 520 |
| KHK       | -0.239188467 | 3.36E-08 | 1.47E-07 | 520 | 520 |

|             |              |          |          |     |     |
|-------------|--------------|----------|----------|-----|-----|
| EEF1B2      | -0.239212815 | 3.35E-08 | 1.47E-07 | 520 | 520 |
| GLRX3       | -0.23927697  | 3.32E-08 | 1.45E-07 | 520 | 520 |
| SEC11C      | -0.239302886 | 3.31E-08 | 1.45E-07 | 520 | 520 |
| FOXD4L1     | -0.23930909  | 3.31E-08 | 1.45E-07 | 520 | 516 |
| HCCS        | -0.239433412 | 3.25E-08 | 1.43E-07 | 520 | 520 |
| TIAL1       | -0.239512702 | 3.22E-08 | 1.41E-07 | 520 | 520 |
| DNASE1      | -0.239634838 | 3.16E-08 | 1.39E-07 | 520 | 520 |
| PKMYT1      | -0.239653834 | 3.15E-08 | 1.39E-07 | 520 | 520 |
| FEN1        | -0.239760725 | 3.11E-08 | 1.37E-07 | 520 | 520 |
| RPL41       | -0.23978     | 3.10E-08 | 1.36E-07 | 520 | 520 |
| CDT1        | -0.239880168 | 3.06E-08 | 1.35E-07 | 520 | 520 |
| ATP5G3      | -0.239963586 | 3.02E-08 | 1.33E-07 | 520 | 520 |
| C18orf56    | -0.239971228 | 3.02E-08 | 1.33E-07 | 520 | 520 |
| NOSIP       | -0.240136053 | 2.95E-08 | 1.30E-07 | 520 | 520 |
| UQCR10      | -0.240183922 | 2.94E-08 | 1.30E-07 | 520 | 520 |
| HMGA1       | -0.240202985 | 2.93E-08 | 1.29E-07 | 520 | 520 |
| C2orf48     | -0.240237085 | 2.91E-08 | 1.29E-07 | 520 | 509 |
| ATRIP       | -0.240246675 | 2.91E-08 | 1.29E-07 | 520 | 520 |
| HBXIP       | -0.240251321 | 2.91E-08 | 1.29E-07 | 520 | 520 |
| DHRS4       | -0.240264166 | 2.90E-08 | 1.28E-07 | 520 | 520 |
| MOBKL2C     | -0.2402939   | 2.89E-08 | 1.28E-07 | 520 | 520 |
| XRCC3       | -0.240312877 | 2.88E-08 | 1.28E-07 | 520 | 520 |
| USP20       | -0.2403329   | 2.88E-08 | 1.27E-07 | 520 | 520 |
| SSU72       | -0.240490659 | 2.82E-08 | 1.25E-07 | 520 | 520 |
| GNA15       | -0.240536714 | 2.80E-08 | 1.24E-07 | 520 | 520 |
| NR1I3       | -0.240539741 | 2.80E-08 | 1.24E-07 | 520 | 520 |
| C12orf62    | -0.240543936 | 2.80E-08 | 1.24E-07 | 520 | 520 |
| C6orf162    | -0.24055716  | 2.79E-08 | 1.24E-07 | 520 | 520 |
| C3orf57     | -0.240586841 | 2.78E-08 | 1.23E-07 | 520 | 515 |
| CHCHD5      | -0.240644003 | 2.76E-08 | 1.22E-07 | 520 | 520 |
| TGM7        | -0.240692828 | 2.74E-08 | 1.21E-07 | 520 | 283 |
| LOC152217   | -0.240765188 | 2.71E-08 | 1.20E-07 | 520 | 520 |
| RPS14       | -0.241125093 | 2.58E-08 | 1.15E-07 | 520 | 520 |
| PIGA        | -0.241155424 | 2.57E-08 | 1.14E-07 | 520 | 520 |
| OSBPL2      | -0.24116208  | 2.57E-08 | 1.14E-07 | 520 | 520 |
| CHAC1       | -0.241238528 | 2.54E-08 | 1.13E-07 | 520 | 520 |
| RCC2        | -0.241307288 | 2.52E-08 | 1.12E-07 | 520 | 520 |
| ATP1B3      | -0.241311778 | 2.52E-08 | 1.12E-07 | 520 | 520 |
| PRPF18      | -0.241581215 | 2.43E-08 | 1.08E-07 | 520 | 520 |
| NEAT1       | -0.241607837 | 2.42E-08 | 1.08E-07 | 520 | 520 |
| SOX21       | -0.241656632 | 2.40E-08 | 1.07E-07 | 520 | 515 |
| NCRNA00204B | -0.24165695  | 2.40E-08 | 1.07E-07 | 520 | 498 |
| GAR1        | -0.241669882 | 2.40E-08 | 1.07E-07 | 520 | 520 |
| MXD1        | -0.241671786 | 2.40E-08 | 1.07E-07 | 520 | 520 |
| NLRX1       | -0.24168267  | 2.39E-08 | 1.07E-07 | 520 | 520 |
| DUSP22      | -0.241712004 | 2.38E-08 | 1.07E-07 | 520 | 520 |

|           |              |          |          |     |     |
|-----------|--------------|----------|----------|-----|-----|
| LYRM1     | -0.241813299 | 2.35E-08 | 1.05E-07 | 520 | 520 |
| HTR3B     | -0.241886765 | 2.33E-08 | 1.04E-07 | 520 | 219 |
| MTHFR     | -0.241890904 | 2.33E-08 | 1.04E-07 | 520 | 520 |
| HMGB2     | -0.241949545 | 2.31E-08 | 1.03E-07 | 520 | 520 |
| OTOP2     | -0.241962221 | 2.30E-08 | 1.03E-07 | 520 | 450 |
| BIK       | -0.241998346 | 2.29E-08 | 1.03E-07 | 520 | 520 |
| PSMB3     | -0.242017671 | 2.29E-08 | 1.02E-07 | 520 | 520 |
| E4F1      | -0.242028308 | 2.28E-08 | 1.02E-07 | 520 | 520 |
| DHRS4L2   | -0.242076003 | 2.27E-08 | 1.02E-07 | 520 | 520 |
| ATP5L     | -0.242160431 | 2.24E-08 | 1.01E-07 | 520 | 520 |
| FKBP3     | -0.242221273 | 2.22E-08 | 9.98E-08 | 520 | 520 |
| C20orf134 | -0.242221375 | 2.22E-08 | 9.98E-08 | 520 | 520 |
| SFRS7     | -0.242226507 | 2.22E-08 | 9.98E-08 | 520 | 520 |
| MTIF3     | -0.242238083 | 2.22E-08 | 9.96E-08 | 520 | 520 |
| ANAPC2    | -0.242254878 | 2.21E-08 | 9.94E-08 | 520 | 520 |
| MRPL53    | -0.242331749 | 2.19E-08 | 9.84E-08 | 520 | 520 |
| PQBP1     | -0.242362498 | 2.18E-08 | 9.80E-08 | 520 | 520 |
| DUT       | -0.242402496 | 2.17E-08 | 9.76E-08 | 520 | 520 |
| ADAT3     | -0.242473138 | 2.15E-08 | 9.67E-08 | 520 | 520 |
| ALDH9A1   | -0.242521224 | 2.13E-08 | 9.61E-08 | 520 | 520 |
| PHLPP1    | -0.242539395 | 2.13E-08 | 9.58E-08 | 520 | 520 |
| PSAT1     | -0.24255869  | 2.12E-08 | 9.56E-08 | 520 | 520 |
| LOC541473 | -0.24259306  | 2.11E-08 | 9.52E-08 | 520 | 512 |
| PSME1     | -0.242599738 | 2.11E-08 | 9.51E-08 | 520 | 520 |
| C19orf25  | -0.242702693 | 2.08E-08 | 9.39E-08 | 520 | 520 |
| PGBD2     | -0.242705602 | 2.08E-08 | 9.39E-08 | 520 | 520 |
| CCNE1     | -0.242733319 | 2.07E-08 | 9.35E-08 | 520 | 520 |
| NFKBIB    | -0.242834545 | 2.04E-08 | 9.22E-08 | 520 | 520 |
| EMD       | -0.242987528 | 2.00E-08 | 9.04E-08 | 520 | 520 |
| CENPM     | -0.243017444 | 1.99E-08 | 9.01E-08 | 520 | 520 |
| TIMM8A    | -0.243053446 | 1.98E-08 | 8.96E-08 | 520 | 520 |
| C9orf6    | -0.243068516 | 1.98E-08 | 8.95E-08 | 520 | 520 |
| FKBP6     | -0.24314046  | 1.96E-08 | 8.87E-08 | 520 | 432 |
| RAB40C    | -0.243260351 | 1.93E-08 | 8.73E-08 | 520 | 520 |
| ZNF576    | -0.243599819 | 1.84E-08 | 8.35E-08 | 520 | 520 |
| CPEB3     | -0.243684872 | 1.82E-08 | 8.26E-08 | 520 | 520 |
| C16orf91  | -0.243775559 | 1.79E-08 | 8.16E-08 | 520 | 520 |
| KRT33A    | -0.243880456 | 1.77E-08 | 8.05E-08 | 520 | 418 |
| OFD1      | -0.243975118 | 1.75E-08 | 7.95E-08 | 520 | 520 |
| C9orf114  | -0.244104715 | 1.71E-08 | 7.82E-08 | 520 | 520 |
| TUBG1     | -0.244208244 | 1.69E-08 | 7.71E-08 | 520 | 520 |
| COQ9      | -0.244437124 | 1.64E-08 | 7.48E-08 | 520 | 520 |
| FBXO22OS  | -0.244440552 | 1.64E-08 | 7.48E-08 | 520 | 520 |
| RPAIN     | -0.244601273 | 1.60E-08 | 7.32E-08 | 520 | 520 |
| RPL13AP3  | -0.244674684 | 1.58E-08 | 7.25E-08 | 520 | 520 |
| C2orf34   | -0.244687466 | 1.58E-08 | 7.24E-08 | 520 | 520 |

|              |              |          |          |     |     |
|--------------|--------------|----------|----------|-----|-----|
| MTA2         | -0.244911316 | 1.53E-08 | 7.03E-08 | 520 | 520 |
| LOC642846    | -0.244967213 | 1.52E-08 | 6.97E-08 | 520 | 520 |
| DHRS4L1      | -0.245078038 | 1.50E-08 | 6.87E-08 | 520 | 520 |
| TTC1         | -0.245171918 | 1.48E-08 | 6.78E-08 | 520 | 520 |
| ILVBL        | -0.245190578 | 1.48E-08 | 6.77E-08 | 520 | 520 |
| C11orf85     | -0.245209634 | 1.47E-08 | 6.75E-08 | 520 | 211 |
| FASTKD1      | -0.245313222 | 1.45E-08 | 6.66E-08 | 520 | 520 |
| NDUFS4       | -0.245332878 | 1.45E-08 | 6.64E-08 | 520 | 520 |
| LOC100216545 | -0.245365067 | 1.44E-08 | 6.61E-08 | 520 | 520 |
| FBXW9        | -0.245484702 | 1.42E-08 | 6.51E-08 | 520 | 520 |
| CCDC25       | -0.245515618 | 1.41E-08 | 6.48E-08 | 520 | 520 |
| IL1F5        | -0.245517828 | 1.41E-08 | 6.48E-08 | 520 | 519 |
| LOC127841    | -0.245518631 | 1.41E-08 | 6.48E-08 | 520 | 279 |
| C11orf83     | -0.24561706  | 1.39E-08 | 6.40E-08 | 520 | 520 |
| FAM183A      | -0.245683376 | 1.38E-08 | 6.34E-08 | 520 | 514 |
| AIFM1        | -0.245733959 | 1.37E-08 | 6.30E-08 | 520 | 520 |
| ISY1         | -0.245743199 | 1.37E-08 | 6.29E-08 | 520 | 520 |
| LINS1        | -0.245779303 | 1.36E-08 | 6.26E-08 | 520 | 520 |
| CPSF3        | -0.245820946 | 1.35E-08 | 6.23E-08 | 520 | 520 |
| DUS2L        | -0.24585744  | 1.34E-08 | 6.20E-08 | 520 | 520 |
| CAPN14       | -0.245901044 | 1.34E-08 | 6.17E-08 | 520 | 515 |
| LOC100134229 | -0.245901366 | 1.34E-08 | 6.17E-08 | 520 | 520 |
| SLC25A25     | -0.245915726 | 1.33E-08 | 6.16E-08 | 520 | 520 |
| KIAA0664     | -0.245961102 | 1.33E-08 | 6.12E-08 | 520 | 520 |
| MBD4         | -0.245975712 | 1.32E-08 | 6.11E-08 | 520 | 520 |
| PAQR6        | -0.245999589 | 1.32E-08 | 6.09E-08 | 520 | 520 |
| RPS17        | -0.24603655  | 1.31E-08 | 6.06E-08 | 520 | 520 |
| TRAIP        | -0.246174768 | 1.29E-08 | 5.95E-08 | 520 | 520 |
| CDS1         | -0.246235393 | 1.28E-08 | 5.91E-08 | 520 | 520 |
| MRPL4        | -0.246357389 | 1.25E-08 | 5.81E-08 | 520 | 520 |
| PP14571      | -0.246410783 | 1.24E-08 | 5.77E-08 | 520 | 479 |
| DBNDD1       | -0.246415118 | 1.24E-08 | 5.77E-08 | 520 | 520 |
| CCDC153      | -0.246506914 | 1.23E-08 | 5.70E-08 | 520 | 520 |
| FAM158A      | -0.246542918 | 1.22E-08 | 5.67E-08 | 520 | 520 |
| RNF39        | -0.246742802 | 1.19E-08 | 5.52E-08 | 520 | 520 |
| PLEKHM1P     | -0.24677077  | 1.18E-08 | 5.50E-08 | 520 | 520 |
| HTR3A        | -0.246933203 | 1.16E-08 | 5.38E-08 | 520 | 448 |
| TUBB4Q       | -0.246942954 | 1.16E-08 | 5.38E-08 | 520 | 448 |
| POU2F3       | -0.246970911 | 1.15E-08 | 5.36E-08 | 520 | 519 |
| ABCA7        | -0.246986735 | 1.15E-08 | 5.35E-08 | 520 | 520 |
| PHOSPHO2     | -0.247002631 | 1.15E-08 | 5.34E-08 | 520 | 520 |
| SH3BP1       | -0.247016931 | 1.14E-08 | 5.33E-08 | 520 | 520 |
| NDUFA5       | -0.247053366 | 1.14E-08 | 5.30E-08 | 520 | 520 |
| SLC6A14      | -0.247136114 | 1.12E-08 | 5.24E-08 | 520 | 515 |
| RPL7A        | -0.247159587 | 1.12E-08 | 5.23E-08 | 520 | 520 |
| WBSCR22      | -0.247204996 | 1.11E-08 | 5.20E-08 | 520 | 520 |

|           |              |          |          |     |     |
|-----------|--------------|----------|----------|-----|-----|
| CYP2E1    | -0.247253599 | 1.11E-08 | 5.16E-08 | 520 | 519 |
| MOB2      | -0.24751482  | 1.07E-08 | 4.98E-08 | 520 | 520 |
| GEN1      | -0.247571952 | 1.06E-08 | 4.95E-08 | 520 | 520 |
| LCMT1     | -0.247632632 | 1.05E-08 | 4.91E-08 | 520 | 520 |
| PLXNB1    | -0.247643947 | 1.05E-08 | 4.90E-08 | 520 | 520 |
| FBXL16    | -0.247724499 | 1.04E-08 | 4.85E-08 | 520 | 520 |
| CKS1B     | -0.247767284 | 1.03E-08 | 4.83E-08 | 520 | 520 |
| OSTalpha  | -0.247779474 | 1.03E-08 | 4.82E-08 | 520 | 520 |
| WDR85     | -0.247964427 | 1.00E-08 | 4.70E-08 | 520 | 520 |
| SPATA5L1  | -0.248102049 | 9.82E-09 | 4.61E-08 | 520 | 520 |
| VPS37B    | -0.248126208 | 9.78E-09 | 4.60E-08 | 520 | 520 |
| SUV39H2   | -0.248182078 | 9.71E-09 | 4.57E-08 | 520 | 520 |
| PRELID1   | -0.248274831 | 9.58E-09 | 4.51E-08 | 520 | 520 |
| EXOSC7    | -0.248291324 | 9.56E-09 | 4.50E-08 | 520 | 520 |
| C9orf85   | -0.248307375 | 9.54E-09 | 4.49E-08 | 520 | 520 |
| NDUFS5    | -0.248323428 | 9.52E-09 | 4.48E-08 | 520 | 520 |
| SFRS16    | -0.248381655 | 9.44E-09 | 4.45E-08 | 520 | 520 |
| TIMM8B    | -0.248387334 | 9.43E-09 | 4.45E-08 | 520 | 520 |
| SDHAP1    | -0.248597733 | 9.15E-09 | 4.32E-08 | 520 | 520 |
| UBL5      | -0.248611169 | 9.14E-09 | 4.31E-08 | 520 | 520 |
| APITD1    | -0.248686552 | 9.04E-09 | 4.27E-08 | 520 | 520 |
| BLNK      | -0.248814337 | 8.88E-09 | 4.20E-08 | 520 | 520 |
| COMMD3    | -0.24888813  | 8.79E-09 | 4.15E-08 | 520 | 520 |
| USH1G     | -0.24906046  | 8.58E-09 | 4.06E-08 | 520 | 517 |
| PPIA      | -0.249218041 | 8.39E-09 | 3.98E-08 | 520 | 520 |
| MYO5B     | -0.249270511 | 8.32E-09 | 3.95E-08 | 520 | 520 |
| MUC15     | -0.249301676 | 8.29E-09 | 3.93E-08 | 520 | 510 |
| JUP       | -0.249356892 | 8.22E-09 | 3.90E-08 | 520 | 520 |
| PCNA      | -0.249423366 | 8.15E-09 | 3.87E-08 | 520 | 520 |
| FOXD4     | -0.249500567 | 8.06E-09 | 3.83E-08 | 520 | 516 |
| PDRG1     | -0.249517222 | 8.04E-09 | 3.82E-08 | 520 | 520 |
| C17orf106 | -0.249523887 | 8.03E-09 | 3.81E-08 | 520 | 520 |
| C8orf38   | -0.249807458 | 7.71E-09 | 3.67E-08 | 520 | 520 |
| MRPS21    | -0.249826663 | 7.69E-09 | 3.66E-08 | 520 | 520 |
| PSMB4     | -0.249882386 | 7.63E-09 | 3.64E-08 | 520 | 520 |
| DCST1     | -0.249925038 | 7.59E-09 | 3.61E-08 | 520 | 373 |
| LYPLAL1   | -0.249934922 | 7.58E-09 | 3.61E-08 | 520 | 520 |
| RTN4IP1   | -0.24997201  | 7.54E-09 | 3.59E-08 | 520 | 520 |
| C8G       | -0.250027232 | 7.48E-09 | 3.57E-08 | 520 | 491 |
| MRPL16    | -0.25008116  | 7.42E-09 | 3.54E-08 | 520 | 520 |
| MST1P2    | -0.250199541 | 7.30E-09 | 3.49E-08 | 520 | 519 |
| SIVA1     | -0.250217968 | 7.28E-09 | 3.48E-08 | 520 | 520 |
| RAB9A     | -0.250322554 | 7.17E-09 | 3.43E-08 | 520 | 520 |
| ALDH16A1  | -0.250338222 | 7.15E-09 | 3.42E-08 | 520 | 520 |
| C12orf56  | -0.250364976 | 7.13E-09 | 3.41E-08 | 520 | 511 |
| BCAS2     | -0.250456482 | 7.04E-09 | 3.37E-08 | 520 | 520 |

|          |              |          |          |     |     |
|----------|--------------|----------|----------|-----|-----|
| RPL34    | -0.250488    | 7.00E-09 | 3.35E-08 | 520 | 520 |
| FAM128A  | -0.250489308 | 7.00E-09 | 3.35E-08 | 520 | 520 |
| C1orf53  | -0.250504583 | 6.99E-09 | 3.35E-08 | 520 | 520 |
| ARSF     | -0.250517292 | 6.97E-09 | 3.34E-08 | 520 | 343 |
| FANCE    | -0.250583397 | 6.91E-09 | 3.31E-08 | 520 | 520 |
| ATP5J2   | -0.250638472 | 6.86E-09 | 3.29E-08 | 520 | 520 |
| RPL23A   | -0.25065986  | 6.83E-09 | 3.28E-08 | 520 | 520 |
| TIAF1    | -0.250686559 | 6.81E-09 | 3.27E-08 | 520 | 520 |
| MACC1    | -0.250796156 | 6.70E-09 | 3.22E-08 | 520 | 520 |
| TIAM1    | -0.250806285 | 6.69E-09 | 3.22E-08 | 520 | 520 |
| WASH3P   | -0.250893038 | 6.61E-09 | 3.18E-08 | 520 | 520 |
| NAIF1    | -0.250980005 | 6.53E-09 | 3.14E-08 | 520 | 520 |
| ZDHHHC23 | -0.250999709 | 6.51E-09 | 3.13E-08 | 520 | 520 |
| ZFAND2B  | -0.251027008 | 6.49E-09 | 3.12E-08 | 520 | 520 |
| C16orf59 | -0.251076532 | 6.44E-09 | 3.10E-08 | 520 | 520 |
| SYT14L   | -0.251131097 | 6.39E-09 | 3.08E-08 | 520 | 253 |
| PMS2L2   | -0.251202805 | 6.33E-09 | 3.05E-08 | 520 | 520 |
| UBA52    | -0.251333201 | 6.21E-09 | 2.99E-08 | 520 | 520 |
| TIMM13   | -0.251355025 | 6.19E-09 | 2.98E-08 | 520 | 520 |
| CEACAM6  | -0.251584245 | 5.99E-09 | 2.89E-08 | 520 | 518 |
| CCDC88B  | -0.251619971 | 5.96E-09 | 2.88E-08 | 520 | 520 |
| CCNO     | -0.251635455 | 5.95E-09 | 2.87E-08 | 520 | 520 |
| ABHD5    | -0.251784075 | 5.82E-09 | 2.81E-08 | 520 | 520 |
| PIF1     | -0.251795023 | 5.81E-09 | 2.81E-08 | 520 | 520 |
| MARVELD2 | -0.251800768 | 5.81E-09 | 2.81E-08 | 520 | 520 |
| PACSIN3  | -0.251821211 | 5.79E-09 | 2.80E-08 | 520 | 520 |
| LRRC45   | -0.251827681 | 5.79E-09 | 2.80E-08 | 520 | 520 |
| C17orf90 | -0.251880494 | 5.74E-09 | 2.78E-08 | 520 | 520 |
| ABLIM1   | -0.251944706 | 5.69E-09 | 2.76E-08 | 520 | 520 |
| ZNF385A  | -0.251958307 | 5.68E-09 | 2.75E-08 | 520 | 520 |
| RNASEH2A | -0.251976633 | 5.66E-09 | 2.75E-08 | 520 | 520 |
| GAS5     | -0.252117352 | 5.55E-09 | 2.70E-08 | 520 | 520 |
| NOP10    | -0.252189728 | 5.49E-09 | 2.67E-08 | 520 | 520 |
| SCNN1D   | -0.252289088 | 5.42E-09 | 2.63E-08 | 520 | 520 |
| SPAG17   | -0.252332709 | 5.38E-09 | 2.62E-08 | 520 | 517 |
| SRP19    | -0.252335366 | 5.38E-09 | 2.62E-08 | 520 | 520 |
| RPS8     | -0.252359954 | 5.36E-09 | 2.61E-08 | 520 | 520 |
| PYCARD   | -0.252384312 | 5.34E-09 | 2.60E-08 | 520 | 520 |
| EIF2B5   | -0.252531027 | 5.23E-09 | 2.55E-08 | 520 | 520 |
| GPR37L1  | -0.252665557 | 5.13E-09 | 2.50E-08 | 520 | 510 |
| TMX2     | -0.253002904 | 4.89E-09 | 2.39E-08 | 520 | 520 |
| MBD2     | -0.25302507  | 4.87E-09 | 2.38E-08 | 520 | 520 |
| GJB5     | -0.253031512 | 4.87E-09 | 2.38E-08 | 520 | 520 |
| TMEM186  | -0.253068529 | 4.84E-09 | 2.37E-08 | 520 | 520 |
| AKR7A3   | -0.253147216 | 4.79E-09 | 2.34E-08 | 520 | 519 |
| ZWINT    | -0.253200467 | 4.75E-09 | 2.32E-08 | 520 | 520 |

|           |              |          |          |     |     |
|-----------|--------------|----------|----------|-----|-----|
| CENPT     | -0.253333995 | 4.66E-09 | 2.28E-08 | 520 | 520 |
| SF4       | -0.253504103 | 4.55E-09 | 2.23E-08 | 520 | 520 |
| L2HGDH    | -0.25351257  | 4.54E-09 | 2.22E-08 | 520 | 520 |
| TAZ       | -0.253534098 | 4.53E-09 | 2.22E-08 | 520 | 520 |
| RPS6KB2   | -0.253535427 | 4.53E-09 | 2.22E-08 | 520 | 520 |
| CHAF1A    | -0.25361004  | 4.48E-09 | 2.19E-08 | 520 | 520 |
| H2AFZ     | -0.253680248 | 4.43E-09 | 2.17E-08 | 520 | 520 |
| INTS10    | -0.253757974 | 4.38E-09 | 2.15E-08 | 520 | 520 |
| EPHX2     | -0.253858516 | 4.32E-09 | 2.12E-08 | 520 | 520 |
| SERPINB11 | -0.253941068 | 4.27E-09 | 2.10E-08 | 520 | 456 |
| BRI3BP    | -0.253944736 | 4.27E-09 | 2.10E-08 | 520 | 520 |
| NAA20     | -0.253956599 | 4.26E-09 | 2.09E-08 | 520 | 520 |
| FAM83C    | -0.254038073 | 4.21E-09 | 2.07E-08 | 520 | 520 |
| C17orf58  | -0.254131824 | 4.15E-09 | 2.04E-08 | 520 | 520 |
| C21orf58  | -0.25434684  | 4.03E-09 | 1.98E-08 | 520 | 520 |
| ZNRD1     | -0.254381907 | 4.01E-09 | 1.97E-08 | 520 | 520 |
| ZDHHC12   | -0.254489871 | 3.94E-09 | 1.95E-08 | 520 | 520 |
| GAS8      | -0.25454108  | 3.92E-09 | 1.93E-08 | 520 | 520 |
| SDHC      | -0.254581792 | 3.89E-09 | 1.92E-08 | 520 | 520 |
| EIF2S2    | -0.254646706 | 3.86E-09 | 1.91E-08 | 520 | 520 |
| LDLRAP1   | -0.254699481 | 3.83E-09 | 1.89E-08 | 520 | 520 |
| PNPO      | -0.254707066 | 3.82E-09 | 1.89E-08 | 520 | 520 |
| MRPL52    | -0.254736976 | 3.81E-09 | 1.88E-08 | 520 | 520 |
| SGK1      | -0.254880954 | 3.73E-09 | 1.85E-08 | 520 | 520 |
| SLC25A41  | -0.254882183 | 3.73E-09 | 1.85E-08 | 520 | 442 |
| GALE      | -0.254926603 | 3.70E-09 | 1.83E-08 | 520 | 520 |
| SNRPE     | -0.255032386 | 3.65E-09 | 1.81E-08 | 520 | 520 |
| MRPL1     | -0.255052407 | 3.64E-09 | 1.80E-08 | 520 | 520 |
| LMTK3     | -0.255139349 | 3.59E-09 | 1.78E-08 | 520 | 520 |
| KLK12     | -0.255273034 | 3.52E-09 | 1.75E-08 | 520 | 507 |
| POF1B     | -0.255291326 | 3.51E-09 | 1.74E-08 | 520 | 520 |
| LPAR6     | -0.255385193 | 3.46E-09 | 1.72E-08 | 520 | 520 |
| EXD3      | -0.255426287 | 3.44E-09 | 1.71E-08 | 520 | 520 |
| SERP1     | -0.255437531 | 3.44E-09 | 1.71E-08 | 520 | 520 |
| NDUFA10   | -0.2555219   | 3.40E-09 | 1.69E-08 | 520 | 520 |
| CCDC101   | -0.255527622 | 3.39E-09 | 1.69E-08 | 520 | 520 |
| HNRNPM    | -0.255554782 | 3.38E-09 | 1.68E-08 | 520 | 520 |
| CCNL1     | -0.255609114 | 3.35E-09 | 1.67E-08 | 520 | 520 |
| PRR22     | -0.255653764 | 3.33E-09 | 1.66E-08 | 520 | 520 |
| ALDH3B2   | -0.255664833 | 3.33E-09 | 1.66E-08 | 520 | 520 |
| CPLX3     | -0.255685302 | 3.32E-09 | 1.65E-08 | 520 | 361 |
| MRPS12    | -0.256068681 | 3.14E-09 | 1.57E-08 | 520 | 520 |
| TPD52     | -0.256100736 | 3.12E-09 | 1.56E-08 | 520 | 520 |
| CRYM      | -0.256389547 | 2.99E-09 | 1.50E-08 | 520 | 506 |
| PRSS22    | -0.25641331  | 2.98E-09 | 1.49E-08 | 520 | 519 |
| TPRKB     | -0.256450427 | 2.97E-09 | 1.49E-08 | 520 | 520 |



|           |              |          |          |     |     |
|-----------|--------------|----------|----------|-----|-----|
| MTPAP     | -0.256462113 | 2.96E-09 | 1.48E-08 | 520 | 520 |
| NAA50     | -0.256481744 | 2.95E-09 | 1.48E-08 | 520 | 520 |
| LOC151009 | -0.256545046 | 2.93E-09 | 1.47E-08 | 520 | 520 |
| C11orf48  | -0.256572489 | 2.91E-09 | 1.46E-08 | 520 | 520 |
| SUPV3L1   | -0.256600847 | 2.90E-09 | 1.46E-08 | 520 | 520 |
| TMEM111   | -0.256667119 | 2.87E-09 | 1.44E-08 | 520 | 520 |
| UBXN8     | -0.256716919 | 2.85E-09 | 1.43E-08 | 520 | 520 |
| LOC388152 | -0.256732956 | 2.85E-09 | 1.43E-08 | 520 | 520 |
| CTAGE4    | -0.25676468  | 2.83E-09 | 1.43E-08 | 520 | 517 |
| CDK5RAP3  | -0.256951053 | 2.76E-09 | 1.39E-08 | 520 | 520 |
| H3F3B     | -0.256955429 | 2.76E-09 | 1.39E-08 | 520 | 520 |
| DDX28     | -0.257122954 | 2.69E-09 | 1.36E-08 | 520 | 520 |
| C17orf69  | -0.257131475 | 2.69E-09 | 1.36E-08 | 520 | 520 |
| MSMB      | -0.257270195 | 2.63E-09 | 1.33E-08 | 520 | 485 |
| GLRX2     | -0.257369511 | 2.59E-09 | 1.31E-08 | 520 | 520 |
| PERP      | -0.257455638 | 2.56E-09 | 1.30E-08 | 520 | 520 |
| SERPINI2  | -0.257497223 | 2.55E-09 | 1.29E-08 | 520 | 212 |
| PPP2R2A   | -0.257507174 | 2.54E-09 | 1.29E-08 | 520 | 520 |
| C1orf159  | -0.257536326 | 2.53E-09 | 1.28E-08 | 520 | 520 |
| KLK13     | -0.257683667 | 2.48E-09 | 1.26E-08 | 520 | 517 |
| SNRNP25   | -0.257758313 | 2.45E-09 | 1.24E-08 | 520 | 520 |
| KLK11     | -0.257945397 | 2.38E-09 | 1.21E-08 | 520 | 518 |
| C1orf135  | -0.258065095 | 2.34E-09 | 1.19E-08 | 520 | 520 |
| RBM17     | -0.258136614 | 2.32E-09 | 1.18E-08 | 520 | 520 |
| SLURP1    | -0.258228564 | 2.29E-09 | 1.16E-08 | 520 | 508 |
| GIN3      | -0.258266949 | 2.27E-09 | 1.16E-08 | 520 | 520 |
| FRG1      | -0.258324328 | 2.25E-09 | 1.15E-08 | 520 | 520 |
| BTF3L4    | -0.258325762 | 2.25E-09 | 1.15E-08 | 520 | 520 |
| GCHFR     | -0.258348241 | 2.25E-09 | 1.15E-08 | 520 | 520 |
| TOMM6     | -0.258411054 | 2.23E-09 | 1.14E-08 | 520 | 520 |
| RIPK4     | -0.258444951 | 2.22E-09 | 1.13E-08 | 520 | 520 |
| MRPL30    | -0.258473799 | 2.21E-09 | 1.13E-08 | 520 | 520 |
| C3orf23   | -0.258508133 | 2.19E-09 | 1.12E-08 | 520 | 520 |
| THOC3     | -0.258548703 | 2.18E-09 | 1.11E-08 | 520 | 520 |
| PRICKLE4  | -0.258632621 | 2.15E-09 | 1.10E-08 | 520 | 519 |
| IZUMO1    | -0.258665994 | 2.14E-09 | 1.10E-08 | 520 | 401 |
| HSPA14    | -0.258668376 | 2.14E-09 | 1.10E-08 | 520 | 520 |
| FOXA1     | -0.258697177 | 2.13E-09 | 1.09E-08 | 520 | 519 |
| RALGPS1   | -0.258771335 | 2.11E-09 | 1.08E-08 | 520 | 520 |
| UQCRC1    | -0.258810432 | 2.10E-09 | 1.07E-08 | 520 | 520 |
| NUDCD2    | -0.25890253  | 2.07E-09 | 1.06E-08 | 520 | 520 |
| GPR143    | -0.258909902 | 2.07E-09 | 1.06E-08 | 520 | 519 |
| HADH      | -0.259068349 | 2.02E-09 | 1.04E-08 | 520 | 520 |
| TRIM29    | -0.259148998 | 2.00E-09 | 1.02E-08 | 520 | 520 |
| PI3       | -0.259149291 | 2.00E-09 | 1.02E-08 | 520 | 520 |
| FAM25A    | -0.259342072 | 1.94E-09 | 9.98E-09 | 520 | 506 |

|              |              |          |          |     |     |
|--------------|--------------|----------|----------|-----|-----|
| RPF1         | -0.259450881 | 1.91E-09 | 9.84E-09 | 520 | 520 |
| ADAT2        | -0.259517392 | 1.89E-09 | 9.76E-09 | 520 | 520 |
| NT5C         | -0.259544561 | 1.88E-09 | 9.72E-09 | 520 | 520 |
| TACO1        | -0.259576353 | 1.87E-09 | 9.68E-09 | 520 | 520 |
| SSBP1        | -0.259685862 | 1.84E-09 | 9.53E-09 | 520 | 520 |
| BOLA2        | -0.259712915 | 1.84E-09 | 9.50E-09 | 520 | 520 |
| MTX1         | -0.259732007 | 1.83E-09 | 9.48E-09 | 520 | 520 |
| BCO2         | -0.259914186 | 1.78E-09 | 9.23E-09 | 520 | 520 |
| ISOC1        | -0.260208082 | 1.71E-09 | 8.85E-09 | 520 | 520 |
| UBE2J2       | -0.260237053 | 1.70E-09 | 8.81E-09 | 520 | 520 |
| RPL36AL      | -0.26025181  | 1.70E-09 | 8.80E-09 | 520 | 520 |
| GBP6         | -0.26027916  | 1.69E-09 | 8.77E-09 | 520 | 520 |
| SURF6        | -0.260429776 | 1.65E-09 | 8.58E-09 | 520 | 520 |
| C14orf138    | -0.260537264 | 1.63E-09 | 8.46E-09 | 520 | 520 |
| PPP2CA       | -0.260546992 | 1.62E-09 | 8.45E-09 | 520 | 520 |
| C17orf53     | -0.260695659 | 1.59E-09 | 8.28E-09 | 520 | 520 |
| FOXN1        | -0.260929668 | 1.53E-09 | 8.01E-09 | 520 | 516 |
| FAF1         | -0.260931525 | 1.53E-09 | 8.00E-09 | 520 | 520 |
| NUAK2        | -0.260972858 | 1.52E-09 | 7.96E-09 | 520 | 520 |
| SNRNP70      | -0.261393281 | 1.43E-09 | 7.49E-09 | 520 | 520 |
| EPHA1        | -0.261396004 | 1.43E-09 | 7.49E-09 | 520 | 520 |
| ADPRHL2      | -0.261408729 | 1.43E-09 | 7.48E-09 | 520 | 520 |
| IQCC         | -0.261470566 | 1.42E-09 | 7.41E-09 | 520 | 520 |
| AMD1         | -0.261484028 | 1.41E-09 | 7.40E-09 | 520 | 520 |
| MRPL27       | -0.261560434 | 1.40E-09 | 7.32E-09 | 520 | 520 |
| SPSB3        | -0.261590379 | 1.39E-09 | 7.29E-09 | 520 | 520 |
| C14orf181    | -0.261772789 | 1.35E-09 | 7.11E-09 | 520 | 520 |
| EAPP         | -0.261861895 | 1.34E-09 | 7.02E-09 | 520 | 520 |
| SPRR1B       | -0.261893595 | 1.33E-09 | 6.99E-09 | 520 | 520 |
| COX8A        | -0.262053612 | 1.30E-09 | 6.83E-09 | 520 | 520 |
| CKB          | -0.262091852 | 1.29E-09 | 6.80E-09 | 520 | 520 |
| RPA2         | -0.262236714 | 1.26E-09 | 6.65E-09 | 520 | 520 |
| EXOSC3       | -0.262348731 | 1.24E-09 | 6.55E-09 | 520 | 520 |
| RNPC3        | -0.26236944  | 1.24E-09 | 6.53E-09 | 520 | 520 |
| FAM104B      | -0.262901884 | 1.14E-09 | 6.05E-09 | 520 | 520 |
| PPP4C        | -0.262962736 | 1.13E-09 | 5.99E-09 | 520 | 520 |
| C9orf95      | -0.263122647 | 1.11E-09 | 5.86E-09 | 520 | 520 |
| TMPRSS11F    | -0.263133462 | 1.10E-09 | 5.85E-09 | 520 | 501 |
| FLAD1        | -0.263134508 | 1.10E-09 | 5.85E-09 | 520 | 520 |
| ATP5G2       | -0.263148372 | 1.10E-09 | 5.84E-09 | 520 | 520 |
| GNRH1        | -0.263241683 | 1.09E-09 | 5.77E-09 | 520 | 519 |
| POLR3K       | -0.263260506 | 1.08E-09 | 5.76E-09 | 520 | 520 |
| LOC100288778 | -0.263299691 | 1.08E-09 | 5.73E-09 | 520 | 520 |
| BCAT2        | -0.263326717 | 1.07E-09 | 5.71E-09 | 520 | 520 |
| PMPCA        | -0.263460332 | 1.05E-09 | 5.60E-09 | 520 | 520 |
| RPP40        | -0.263485552 | 1.05E-09 | 5.58E-09 | 520 | 520 |

|          |              |          |          |     |     |
|----------|--------------|----------|----------|-----|-----|
| CKS2     | -0.263506307 | 1.04E-09 | 5.56E-09 | 520 | 520 |
| LCN12    | -0.263520338 | 1.04E-09 | 5.55E-09 | 520 | 420 |
| C8orf55  | -0.263536322 | 1.04E-09 | 5.54E-09 | 520 | 520 |
| IPPK     | -0.263542137 | 1.04E-09 | 5.54E-09 | 520 | 520 |
| CCDC150  | -0.263575462 | 1.03E-09 | 5.51E-09 | 520 | 520 |
| HOOK1    | -0.263747949 | 1.01E-09 | 5.38E-09 | 520 | 520 |
| UBE2M    | -0.263766371 | 1.00E-09 | 5.37E-09 | 520 | 520 |
| CYP3A5   | -0.263779306 | 1.00E-09 | 5.36E-09 | 520 | 519 |
| ALDH3A2  | -0.263820059 | 9.96E-10 | 5.33E-09 | 520 | 520 |
| COX17    | -0.263857152 | 9.90E-10 | 5.30E-09 | 520 | 520 |
| STYK1    | -0.263897869 | 9.84E-10 | 5.27E-09 | 520 | 520 |
| C6orf192 | -0.263943877 | 9.77E-10 | 5.24E-09 | 520 | 520 |
| GPR109B  | -0.263978593 | 9.72E-10 | 5.21E-09 | 520 | 520 |
| TBX6     | -0.264005023 | 9.68E-10 | 5.19E-09 | 520 | 520 |
| C11orf35 | -0.264023205 | 9.66E-10 | 5.18E-09 | 520 | 519 |
| POP5     | -0.264127822 | 9.50E-10 | 5.10E-09 | 520 | 520 |
| LARP4B   | -0.264163844 | 9.45E-10 | 5.08E-09 | 520 | 520 |
| FAM110A  | -0.264207028 | 9.39E-10 | 5.05E-09 | 520 | 520 |
| BCL2L15  | -0.264237272 | 9.35E-10 | 5.03E-09 | 520 | 510 |
| RPS24    | -0.264249606 | 9.33E-10 | 5.02E-09 | 520 | 520 |
| PDCL3    | -0.26434958  | 9.19E-10 | 4.95E-09 | 520 | 520 |
| RPL36    | -0.26436968  | 9.16E-10 | 4.93E-09 | 520 | 520 |
| NDUFA6   | -0.264390802 | 9.14E-10 | 4.92E-09 | 520 | 520 |
| LRIT3    | -0.264425986 | 9.09E-10 | 4.89E-09 | 520 | 477 |
| ODF4     | -0.264441335 | 9.07E-10 | 4.88E-09 | 520 | 183 |
| NDUFB11  | -0.264520682 | 8.96E-10 | 4.83E-09 | 520 | 520 |
| SERPIN2  | -0.264589534 | 8.87E-10 | 4.78E-09 | 520 | 518 |
| DKK4     | -0.264860035 | 8.51E-10 | 4.59E-09 | 520 | 366 |
| SPDYA    | -0.264953123 | 8.39E-10 | 4.54E-09 | 520 | 517 |
| KEAP1    | -0.265013179 | 8.32E-10 | 4.50E-09 | 520 | 520 |
| SLC25A3  | -0.265206535 | 8.08E-10 | 4.38E-09 | 520 | 520 |
| BCL11A   | -0.265264516 | 8.01E-10 | 4.34E-09 | 520 | 520 |
| PBK      | -0.265279873 | 7.99E-10 | 4.33E-09 | 520 | 520 |
| ZNF219   | -0.265301377 | 7.96E-10 | 4.32E-09 | 520 | 520 |
| DUOX1    | -0.265579633 | 7.63E-10 | 4.15E-09 | 520 | 520 |
| C2orf15  | -0.265581724 | 7.63E-10 | 4.15E-09 | 520 | 518 |
| ELOVL7   | -0.265607752 | 7.60E-10 | 4.13E-09 | 520 | 520 |
| NDUFB10  | -0.265633238 | 7.57E-10 | 4.12E-09 | 520 | 520 |
| KCTD1    | -0.265672148 | 7.53E-10 | 4.09E-09 | 520 | 520 |
| SLC4A11  | -0.265754778 | 7.43E-10 | 4.05E-09 | 520 | 520 |
| MIDN     | -0.265793496 | 7.39E-10 | 4.02E-09 | 520 | 520 |
| PTPN2    | -0.265852499 | 7.32E-10 | 3.99E-09 | 520 | 520 |
| RPS21    | -0.266101572 | 7.05E-10 | 3.84E-09 | 520 | 520 |
| UPK3BL   | -0.266113583 | 7.04E-10 | 3.84E-09 | 520 | 519 |
| ITPKC    | -0.266161693 | 6.99E-10 | 3.81E-09 | 520 | 520 |
| HNRNPA1  | -0.266264766 | 6.88E-10 | 3.76E-09 | 520 | 520 |

|           |              |          |          |     |     |
|-----------|--------------|----------|----------|-----|-----|
| RPS19     | -0.266454226 | 6.68E-10 | 3.65E-09 | 520 | 520 |
| HDAC1     | -0.266477305 | 6.66E-10 | 3.64E-09 | 520 | 520 |
| PTGR2     | -0.26659884  | 6.54E-10 | 3.58E-09 | 520 | 520 |
| CEP70     | -0.266609699 | 6.53E-10 | 3.57E-09 | 520 | 520 |
| TMPRSS2   | -0.266663525 | 6.47E-10 | 3.54E-09 | 520 | 508 |
| DNASE1L3  | -0.267176529 | 5.99E-10 | 3.28E-09 | 520 | 519 |
| IL1F9     | -0.267199136 | 5.97E-10 | 3.27E-09 | 520 | 519 |
| MRRF      | -0.267228912 | 5.94E-10 | 3.26E-09 | 520 | 520 |
| TIMM16    | -0.267234806 | 5.93E-10 | 3.26E-09 | 520 | 520 |
| CDC25A    | -0.267260117 | 5.91E-10 | 3.25E-09 | 520 | 520 |
| RPS27     | -0.267260381 | 5.91E-10 | 3.25E-09 | 520 | 520 |
| FAM25B    | -0.267269686 | 5.90E-10 | 3.24E-09 | 520 | 486 |
| GSS       | -0.267400575 | 5.79E-10 | 3.18E-09 | 520 | 520 |
| SLC25A5   | -0.267407259 | 5.78E-10 | 3.18E-09 | 520 | 520 |
| LENG9     | -0.26750449  | 5.69E-10 | 3.14E-09 | 520 | 520 |
| RNMTL1    | -0.267508321 | 5.69E-10 | 3.14E-09 | 520 | 520 |
| LEAP2     | -0.267565478 | 5.64E-10 | 3.11E-09 | 520 | 485 |
| ZNF784    | -0.267723373 | 5.51E-10 | 3.04E-09 | 520 | 520 |
| NSUN5P2   | -0.267758334 | 5.48E-10 | 3.02E-09 | 520 | 520 |
| TMEM141   | -0.267764637 | 5.47E-10 | 3.02E-09 | 520 | 520 |
| ZNF789    | -0.267787822 | 5.45E-10 | 3.01E-09 | 520 | 520 |
| ENOSF1    | -0.267799422 | 5.44E-10 | 3.01E-09 | 520 | 520 |
| PSMB7     | -0.267848223 | 5.40E-10 | 2.99E-09 | 520 | 520 |
| TJP2      | -0.268056195 | 5.23E-10 | 2.90E-09 | 520 | 520 |
| TMEM171   | -0.268069234 | 5.22E-10 | 2.89E-09 | 520 | 520 |
| SEMA4A    | -0.268183079 | 5.13E-10 | 2.84E-09 | 520 | 520 |
| NAP1L4    | -0.268198366 | 5.12E-10 | 2.84E-09 | 520 | 520 |
| MRPL54    | -0.268353783 | 5.00E-10 | 2.77E-09 | 520 | 520 |
| HOPX      | -0.268433199 | 4.94E-10 | 2.74E-09 | 520 | 520 |
| NUDT1     | -0.268473727 | 4.91E-10 | 2.73E-09 | 520 | 520 |
| TBCA      | -0.268637282 | 4.79E-10 | 2.66E-09 | 520 | 520 |
| CWF19L1   | -0.268648333 | 4.78E-10 | 2.66E-09 | 520 | 520 |
| MRPL12    | -0.26866756  | 4.76E-10 | 2.65E-09 | 520 | 520 |
| CARD14    | -0.268711977 | 4.73E-10 | 2.63E-09 | 520 | 520 |
| AIMP1     | -0.268731567 | 4.72E-10 | 2.63E-09 | 520 | 520 |
| SFRS12IP1 | -0.268761109 | 4.70E-10 | 2.62E-09 | 520 | 520 |
| AP1M2     | -0.268899105 | 4.60E-10 | 2.57E-09 | 520 | 520 |
| ABT1      | -0.268971599 | 4.55E-10 | 2.54E-09 | 520 | 520 |
| COQ7      | -0.269110262 | 4.45E-10 | 2.49E-09 | 520 | 520 |
| SFN       | -0.269213833 | 4.38E-10 | 2.45E-09 | 520 | 520 |
| APOO      | -0.269432302 | 4.24E-10 | 2.37E-09 | 520 | 520 |
| PLEKHH1   | -0.26964636  | 4.10E-10 | 2.30E-09 | 520 | 520 |
| SNHG12    | -0.269676797 | 4.08E-10 | 2.29E-09 | 520 | 520 |
| LRDD      | -0.269758419 | 4.03E-10 | 2.26E-09 | 520 | 520 |
| MED7      | -0.26978125  | 4.01E-10 | 2.26E-09 | 520 | 520 |
| MRPL37    | -0.269855641 | 3.97E-10 | 2.23E-09 | 520 | 520 |

|           |              |          |          |     |     |
|-----------|--------------|----------|----------|-----|-----|
| RPS15     | -0.270067646 | 3.84E-10 | 2.16E-09 | 520 | 520 |
| SCNN1B    | -0.27019558  | 3.77E-10 | 2.12E-09 | 520 | 516 |
| MYL5      | -0.270256688 | 3.73E-10 | 2.10E-09 | 520 | 520 |
| ARPC3     | -0.270388886 | 3.65E-10 | 2.06E-09 | 520 | 520 |
| MRPL23    | -0.270484051 | 3.60E-10 | 2.03E-09 | 520 | 520 |
| FAM195A   | -0.27056518  | 3.56E-10 | 2.01E-09 | 520 | 520 |
| APEX2     | -0.27060051  | 3.54E-10 | 2.00E-09 | 520 | 520 |
| PSMG4     | -0.270741604 | 3.46E-10 | 1.96E-09 | 520 | 520 |
| EIF6      | -0.270879091 | 3.39E-10 | 1.92E-09 | 520 | 520 |
| CDRT1     | -0.27090409  | 3.37E-10 | 1.91E-09 | 520 | 520 |
| RPL36A    | -0.270954741 | 3.35E-10 | 1.89E-09 | 520 | 520 |
| LOC284632 | -0.271019577 | 3.31E-10 | 1.88E-09 | 520 | 324 |
| CCDC72    | -0.271063386 | 3.29E-10 | 1.86E-09 | 520 | 520 |
| RECQL5    | -0.271110082 | 3.27E-10 | 1.85E-09 | 520 | 520 |
| MLF1IP    | -0.271138526 | 3.25E-10 | 1.84E-09 | 520 | 520 |
| SMAD5OS   | -0.271331815 | 3.16E-10 | 1.79E-09 | 520 | 520 |
| STARD5    | -0.271790871 | 2.94E-10 | 1.67E-09 | 520 | 520 |
| C15orf40  | -0.271815096 | 2.93E-10 | 1.67E-09 | 520 | 520 |
| SLC2A8    | -0.272098559 | 2.80E-10 | 1.60E-09 | 520 | 520 |
| TEC       | -0.272100519 | 2.80E-10 | 1.60E-09 | 520 | 520 |
| LTA4H     | -0.272130349 | 2.79E-10 | 1.59E-09 | 520 | 520 |
| CACYBP    | -0.272140485 | 2.78E-10 | 1.59E-09 | 520 | 520 |
| HMG2      | -0.272160556 | 2.78E-10 | 1.58E-09 | 520 | 520 |
| NIT2      | -0.272304445 | 2.71E-10 | 1.55E-09 | 520 | 520 |
| MCAT      | -0.272374545 | 2.69E-10 | 1.53E-09 | 520 | 520 |
| SNHG1     | -0.272389284 | 2.68E-10 | 1.53E-09 | 520 | 520 |
| PSMG1     | -0.272433383 | 2.66E-10 | 1.52E-09 | 520 | 520 |
| MITD1     | -0.272527615 | 2.62E-10 | 1.50E-09 | 520 | 520 |
| D2HGDH    | -0.272579468 | 2.60E-10 | 1.49E-09 | 520 | 520 |
| PIH1D1    | -0.272582628 | 2.60E-10 | 1.49E-09 | 520 | 520 |
| FFAR2     | -0.272628493 | 2.58E-10 | 1.48E-09 | 520 | 519 |
| CYP4B1    | -0.272723449 | 2.54E-10 | 1.46E-09 | 520 | 486 |
| NDUFA13   | -0.272750755 | 2.53E-10 | 1.45E-09 | 520 | 520 |
| FGFBP1    | -0.272779521 | 2.52E-10 | 1.45E-09 | 520 | 520 |
| KAT2A     | -0.272796395 | 2.51E-10 | 1.44E-09 | 520 | 520 |
| GPR172B   | -0.272929843 | 2.46E-10 | 1.41E-09 | 520 | 520 |
| RPS15A    | -0.272972231 | 2.45E-10 | 1.41E-09 | 520 | 520 |
| ETV2      | -0.273226174 | 2.35E-10 | 1.35E-09 | 520 | 520 |
| ZNF552    | -0.273493302 | 2.25E-10 | 1.30E-09 | 520 | 520 |
| MDH1      | -0.273609977 | 2.21E-10 | 1.28E-09 | 520 | 520 |
| POLB      | -0.273626652 | 2.21E-10 | 1.28E-09 | 520 | 520 |
| AURKAIP1  | -0.273757536 | 2.16E-10 | 1.25E-09 | 520 | 520 |
| KIAA1522  | -0.273797301 | 2.15E-10 | 1.24E-09 | 520 | 520 |
| TUFM      | -0.273858381 | 2.13E-10 | 1.23E-09 | 520 | 520 |
| MRPL50    | -0.273991585 | 2.09E-10 | 1.21E-09 | 520 | 520 |
| ZYG11A    | -0.274272539 | 2.00E-10 | 1.16E-09 | 520 | 496 |

|              |              |          |          |     |     |
|--------------|--------------|----------|----------|-----|-----|
| CEBPG        | -0.274278612 | 1.99E-10 | 1.16E-09 | 520 | 520 |
| ZNF524       | -0.27427947  | 1.99E-10 | 1.16E-09 | 520 | 520 |
| SCEL         | -0.274331656 | 1.98E-10 | 1.15E-09 | 520 | 520 |
| RBM34        | -0.274340563 | 1.97E-10 | 1.15E-09 | 520 | 520 |
| FAAH         | -0.274558151 | 1.91E-10 | 1.11E-09 | 520 | 520 |
| CBWD2        | -0.274687106 | 1.87E-10 | 1.09E-09 | 520 | 520 |
| MRPS11       | -0.274753435 | 1.85E-10 | 1.08E-09 | 520 | 520 |
| PTGES3       | -0.274789626 | 1.84E-10 | 1.07E-09 | 520 | 520 |
| RPS10        | -0.274985078 | 1.78E-10 | 1.04E-09 | 520 | 520 |
| C9orf45      | -0.275066912 | 1.76E-10 | 1.03E-09 | 520 | 520 |
| LOC100271831 | -0.275240843 | 1.71E-10 | 1.00E-09 | 520 | 514 |
| GTF2B        | -0.275265474 | 1.71E-10 | 1.00E-09 | 520 | 520 |
| NSUN5P1      | -0.275525026 | 1.64E-10 | 9.62E-10 | 520 | 520 |
| YOD1         | -0.275622186 | 1.61E-10 | 9.48E-10 | 520 | 520 |
| FBL          | -0.27568826  | 1.60E-10 | 9.38E-10 | 520 | 520 |
| TRIAP1       | -0.275711809 | 1.59E-10 | 9.35E-10 | 520 | 520 |
| BLVRB        | -0.275761466 | 1.58E-10 | 9.28E-10 | 520 | 520 |
| NDUFB7       | -0.275922805 | 1.54E-10 | 9.05E-10 | 520 | 520 |
| MAT2A        | -0.276084605 | 1.50E-10 | 8.83E-10 | 520 | 520 |
| LSM4         | -0.276155471 | 1.48E-10 | 8.74E-10 | 520 | 520 |
| CTRL         | -0.276245919 | 1.46E-10 | 8.62E-10 | 520 | 520 |
| MRPL35       | -0.276256326 | 1.46E-10 | 8.60E-10 | 520 | 520 |
| PTTG3P       | -0.276277682 | 1.45E-10 | 8.58E-10 | 520 | 520 |
| ZCCHC10      | -0.276598298 | 1.38E-10 | 8.17E-10 | 520 | 520 |
| ALOX12B      | -0.27700338  | 1.30E-10 | 7.67E-10 | 520 | 517 |
| A2ML1        | -0.277056149 | 1.29E-10 | 7.61E-10 | 520 | 518 |
| MFSD5        | -0.277076578 | 1.28E-10 | 7.59E-10 | 520 | 520 |
| OCLN         | -0.277191469 | 1.26E-10 | 7.46E-10 | 520 | 520 |
| SFPQ         | -0.277401424 | 1.22E-10 | 7.22E-10 | 520 | 520 |
| CBWD1        | -0.277431933 | 1.21E-10 | 7.19E-10 | 520 | 520 |
| CALML4       | -0.27754191  | 1.19E-10 | 7.07E-10 | 520 | 520 |
| NMRAL1       | -0.277717968 | 1.16E-10 | 6.88E-10 | 520 | 520 |
| PSTK         | -0.277797626 | 1.14E-10 | 6.80E-10 | 520 | 520 |
| C9orf140     | -0.277980187 | 1.11E-10 | 6.60E-10 | 520 | 520 |
| NACAP1       | -0.27801443  | 1.10E-10 | 6.57E-10 | 520 | 520 |
| REC8         | -0.278110139 | 1.09E-10 | 6.48E-10 | 520 | 520 |
| STRBP        | -0.278122065 | 1.08E-10 | 6.47E-10 | 520 | 520 |
| PDHA1        | -0.278191098 | 1.07E-10 | 6.40E-10 | 520 | 520 |
| PCCB         | -0.278313945 | 1.05E-10 | 6.29E-10 | 520 | 520 |
| ASF1B        | -0.278420841 | 1.03E-10 | 6.19E-10 | 520 | 520 |
| BIN3         | -0.27860436  | 1.00E-10 | 6.02E-10 | 520 | 520 |
| HNRNPAB      | -0.279005604 | 9.42E-11 | 5.66E-10 | 520 | 520 |
| C1orf156     | -0.27907504  | 9.31E-11 | 5.60E-10 | 520 | 520 |
| HSDL2        | -0.279083417 | 9.30E-11 | 5.59E-10 | 520 | 520 |
| PIGX         | -0.279130985 | 9.23E-11 | 5.55E-10 | 520 | 520 |
| NR2C2AP      | -0.279138555 | 9.22E-11 | 5.54E-10 | 520 | 520 |

|           |              |          |          |     |     |
|-----------|--------------|----------|----------|-----|-----|
| RPL18     | -0.279320016 | 8.95E-11 | 5.39E-10 | 520 | 520 |
| SF3B14    | -0.279374326 | 8.88E-11 | 5.35E-10 | 520 | 520 |
| CDK1      | -0.279472715 | 8.74E-11 | 5.28E-10 | 520 | 520 |
| SERPINB13 | -0.279531578 | 8.66E-11 | 5.23E-10 | 520 | 520 |
| PFDN6     | -0.279609188 | 8.55E-11 | 5.17E-10 | 520 | 520 |
| IDH3A     | -0.279651377 | 8.49E-11 | 5.14E-10 | 520 | 520 |
| C10orf99  | -0.279712537 | 8.41E-11 | 5.09E-10 | 520 | 519 |
| MRPS16    | -0.279730002 | 8.38E-11 | 5.08E-10 | 520 | 520 |
| LRRRC16B  | -0.279739124 | 8.37E-11 | 5.07E-10 | 520 | 520 |
| CLIC3     | -0.279773763 | 8.32E-11 | 5.05E-10 | 520 | 520 |
| ADH7      | -0.27992287  | 8.13E-11 | 4.94E-10 | 520 | 506 |
| PSCA      | -0.279984184 | 8.05E-11 | 4.89E-10 | 520 | 519 |
| SFRS2     | -0.280016646 | 8.01E-11 | 4.87E-10 | 520 | 520 |
| C9orf103  | -0.28003959  | 7.98E-11 | 4.85E-10 | 520 | 520 |
| C15orf29  | -0.280091168 | 7.91E-11 | 4.82E-10 | 520 | 520 |
| RASSF5    | -0.280098718 | 7.90E-11 | 4.81E-10 | 520 | 520 |
| ATP5S     | -0.280114915 | 7.88E-11 | 4.80E-10 | 520 | 520 |
| ZNHIT3    | -0.280268399 | 7.69E-11 | 4.69E-10 | 520 | 520 |
| PABPN1    | -0.280341909 | 7.60E-11 | 4.64E-10 | 520 | 520 |
| C14orf80  | -0.280349816 | 7.59E-11 | 4.63E-10 | 520 | 520 |
| MUC4      | -0.280381917 | 7.55E-11 | 4.61E-10 | 520 | 518 |
| ATG16L2   | -0.280419514 | 7.50E-11 | 4.59E-10 | 520 | 520 |
| DPY30     | -0.280451632 | 7.46E-11 | 4.57E-10 | 520 | 520 |
| GRPEL2    | -0.280526467 | 7.38E-11 | 4.52E-10 | 520 | 520 |
| COQ2      | -0.280626998 | 7.26E-11 | 4.45E-10 | 520 | 520 |
| MRPS15    | -0.280788358 | 7.07E-11 | 4.34E-10 | 520 | 520 |
| SAC3D1    | -0.280818513 | 7.04E-11 | 4.32E-10 | 520 | 520 |
| PRKCZ     | -0.280962963 | 6.87E-11 | 4.23E-10 | 520 | 520 |
| PAK6      | -0.280969979 | 6.87E-11 | 4.22E-10 | 520 | 520 |
| MAP3K6    | -0.281085083 | 6.74E-11 | 4.15E-10 | 520 | 520 |
| PA2G4P4   | -0.281120717 | 6.70E-11 | 4.13E-10 | 520 | 520 |
| IMPA2     | -0.281227692 | 6.59E-11 | 4.06E-10 | 520 | 520 |
| POP7      | -0.281302085 | 6.51E-11 | 4.02E-10 | 520 | 520 |
| TRA2B     | -0.281377878 | 6.43E-11 | 3.97E-10 | 520 | 520 |
| BCCIP     | -0.281402689 | 6.40E-11 | 3.95E-10 | 520 | 520 |
| AK2       | -0.28143476  | 6.37E-11 | 3.93E-10 | 520 | 520 |
| NASP      | -0.281516069 | 6.29E-11 | 3.88E-10 | 520 | 520 |
| ATP8B5P   | -0.281545157 | 6.26E-11 | 3.87E-10 | 520 | 520 |
| CYCS      | -0.281615066 | 6.19E-11 | 3.83E-10 | 520 | 520 |
| C3orf62   | -0.281700937 | 6.10E-11 | 3.78E-10 | 520 | 520 |
| C16orf7   | -0.281706722 | 6.10E-11 | 3.77E-10 | 520 | 520 |
| RNF183    | -0.282139756 | 5.68E-11 | 3.53E-10 | 520 | 439 |
| GTPBP8    | -0.282201488 | 5.63E-11 | 3.49E-10 | 520 | 520 |
| DUS1L     | -0.28238711  | 5.46E-11 | 3.40E-10 | 520 | 520 |
| CSAD      | -0.282466729 | 5.39E-11 | 3.36E-10 | 520 | 520 |
| ADAM15    | -0.28282469  | 5.08E-11 | 3.17E-10 | 520 | 520 |

|          |              |          |          |     |     |
|----------|--------------|----------|----------|-----|-----|
| NRTN     | -0.282862601 | 5.05E-11 | 3.15E-10 | 520 | 517 |
| ZNF276   | -0.282892254 | 5.03E-11 | 3.14E-10 | 520 | 520 |
| SUMO2    | -0.282910544 | 5.01E-11 | 3.13E-10 | 520 | 520 |
| PPP1R7   | -0.283210129 | 4.77E-11 | 2.99E-10 | 520 | 520 |
| ATPAF1   | -0.283494912 | 4.56E-11 | 2.86E-10 | 520 | 520 |
| C1orf170 | -0.283521701 | 4.54E-11 | 2.85E-10 | 520 | 520 |
| PSMA5    | -0.283560636 | 4.51E-11 | 2.83E-10 | 520 | 520 |
| RPS29    | -0.283619654 | 4.47E-11 | 2.80E-10 | 520 | 520 |
| C3orf54  | -0.284075335 | 4.15E-11 | 2.61E-10 | 520 | 520 |
| ALKBH6   | -0.284076937 | 4.15E-11 | 2.61E-10 | 520 | 520 |
| NDUFS3   | -0.284101412 | 4.13E-11 | 2.60E-10 | 520 | 520 |
| TSTD1    | -0.284257228 | 4.02E-11 | 2.54E-10 | 520 | 520 |
| C10orf58 | -0.284337313 | 3.97E-11 | 2.51E-10 | 520 | 520 |
| RPL6     | -0.2843442   | 3.97E-11 | 2.51E-10 | 520 | 520 |
| PDIK1L   | -0.284710489 | 3.74E-11 | 2.36E-10 | 520 | 520 |
| DEGS2    | -0.284784071 | 3.69E-11 | 2.34E-10 | 520 | 518 |
| CTNNBIP1 | -0.284787876 | 3.69E-11 | 2.34E-10 | 520 | 520 |
| PSMC5    | -0.284835064 | 3.66E-11 | 2.32E-10 | 520 | 520 |
| NUP37    | -0.284858262 | 3.65E-11 | 2.31E-10 | 520 | 520 |
| PAX9     | -0.284862901 | 3.64E-11 | 2.31E-10 | 520 | 520 |
| RPL11    | -0.284925304 | 3.61E-11 | 2.29E-10 | 520 | 520 |
| TXNL4A   | -0.284938653 | 3.60E-11 | 2.28E-10 | 520 | 520 |
| POLR2J4  | -0.285005751 | 3.56E-11 | 2.26E-10 | 520 | 520 |
| NDUFA12  | -0.285092862 | 3.51E-11 | 2.23E-10 | 520 | 520 |
| FLJ42289 | -0.285106321 | 3.50E-11 | 2.22E-10 | 520 | 520 |
| C4orf23  | -0.2852086   | 3.44E-11 | 2.19E-10 | 520 | 520 |
| SHFM1    | -0.285281546 | 3.40E-11 | 2.17E-10 | 520 | 520 |
| AQP3     | -0.285364704 | 3.36E-11 | 2.14E-10 | 520 | 520 |
| PPP2R5A  | -0.285384829 | 3.35E-11 | 2.13E-10 | 520 | 520 |
| HSD17B10 | -0.28579591  | 3.13E-11 | 1.99E-10 | 520 | 520 |
| RAET1E   | -0.286089741 | 2.98E-11 | 1.90E-10 | 520 | 519 |
| CYP2C19  | -0.286192126 | 2.93E-11 | 1.87E-10 | 520 | 374 |
| OXSM     | -0.286224822 | 2.91E-11 | 1.86E-10 | 520 | 520 |
| LDLRAD1  | -0.286246903 | 2.90E-11 | 1.86E-10 | 520 | 265 |
| DEFB4A   | -0.286374562 | 2.84E-11 | 1.82E-10 | 520 | 462 |
| NOP58    | -0.286417977 | 2.82E-11 | 1.81E-10 | 520 | 520 |
| SNRPG    | -0.286592896 | 2.74E-11 | 1.76E-10 | 520 | 520 |
| HSPE1    | -0.286739245 | 2.68E-11 | 1.72E-10 | 520 | 520 |
| PLCXD1   | -0.286802678 | 2.65E-11 | 1.70E-10 | 520 | 520 |
| MAGIX    | -0.287011971 | 2.56E-11 | 1.64E-10 | 520 | 520 |
| ZNF541   | -0.28706567  | 2.54E-11 | 1.63E-10 | 520 | 484 |
| TCEA3    | -0.287074195 | 2.53E-11 | 1.63E-10 | 520 | 520 |
| THOC7    | -0.287178016 | 2.49E-11 | 1.60E-10 | 520 | 520 |
| EIF3K    | -0.287250258 | 2.46E-11 | 1.59E-10 | 520 | 520 |
| PSMG2    | -0.287294203 | 2.44E-11 | 1.57E-10 | 520 | 520 |
| PPFIBP2  | -0.287473197 | 2.37E-11 | 1.53E-10 | 520 | 520 |



|           |              |          |          |     |     |
|-----------|--------------|----------|----------|-----|-----|
| UBE2D2    | -0.287876713 | 2.22E-11 | 1.43E-10 | 520 | 520 |
| LOC81691  | -0.288250615 | 2.08E-11 | 1.35E-10 | 520 | 520 |
| NFATC2IP  | -0.288321418 | 2.06E-11 | 1.33E-10 | 520 | 520 |
| ATP10B    | -0.288489187 | 2.00E-11 | 1.30E-10 | 520 | 520 |
| NDUFA1    | -0.288548815 | 1.98E-11 | 1.29E-10 | 520 | 520 |
| C19orf43  | -0.288660317 | 1.95E-11 | 1.26E-10 | 520 | 520 |
| ILDR1     | -0.288725783 | 1.93E-11 | 1.25E-10 | 520 | 519 |
| RPS27A    | -0.288764029 | 1.91E-11 | 1.24E-10 | 520 | 520 |
| ALS2CL    | -0.288808934 | 1.90E-11 | 1.23E-10 | 520 | 520 |
| HSPB11    | -0.288917899 | 1.86E-11 | 1.21E-10 | 520 | 520 |
| BLOC1S1   | -0.288932858 | 1.86E-11 | 1.21E-10 | 520 | 520 |
| RPS7      | -0.289009414 | 1.84E-11 | 1.19E-10 | 520 | 520 |
| C2orf29   | -0.289089971 | 1.81E-11 | 1.18E-10 | 520 | 520 |
| RFC2      | -0.289133358 | 1.80E-11 | 1.17E-10 | 520 | 520 |
| FBXO25    | -0.289163768 | 1.79E-11 | 1.17E-10 | 520 | 520 |
| TMEM79    | -0.289262375 | 1.76E-11 | 1.15E-10 | 520 | 520 |
| C14orf73  | -0.289311782 | 1.75E-11 | 1.14E-10 | 520 | 509 |
| WASH7P    | -0.289420173 | 1.71E-11 | 1.12E-10 | 520 | 520 |
| FAM129B   | -0.289467688 | 1.70E-11 | 1.11E-10 | 520 | 520 |
| C6orf26   | -0.28949294  | 1.69E-11 | 1.11E-10 | 520 | 520 |
| LOC284837 | -0.289553866 | 1.68E-11 | 1.10E-10 | 520 | 520 |
| LOC284233 | -0.289584661 | 1.67E-11 | 1.09E-10 | 520 | 390 |
| CETN3     | -0.289598857 | 1.66E-11 | 1.09E-10 | 520 | 520 |
| FANCL     | -0.289714528 | 1.63E-11 | 1.07E-10 | 520 | 520 |
| OTOP3     | -0.289811987 | 1.61E-11 | 1.05E-10 | 520 | 442 |
| CES3      | -0.289853426 | 1.60E-11 | 1.05E-10 | 520 | 519 |
| GTF3C5    | -0.289910906 | 1.58E-11 | 1.04E-10 | 520 | 520 |
| CHMP2A    | -0.290200132 | 1.51E-11 | 9.90E-11 | 520 | 520 |
| SLC27A5   | -0.290497202 | 1.43E-11 | 9.43E-11 | 520 | 520 |
| MRPS5     | -0.290518343 | 1.43E-11 | 9.40E-11 | 520 | 520 |
| TYSND1    | -0.290520809 | 1.43E-11 | 9.40E-11 | 520 | 520 |
| TRUB2     | -0.290545029 | 1.42E-11 | 9.36E-11 | 520 | 520 |
| SNRPD3    | -0.290778522 | 1.37E-11 | 9.01E-11 | 520 | 520 |
| MRPL47    | -0.290791118 | 1.36E-11 | 9.00E-11 | 520 | 520 |
| SFRS5     | -0.290821541 | 1.36E-11 | 8.95E-11 | 520 | 520 |
| COX16     | -0.290910414 | 1.34E-11 | 8.83E-11 | 520 | 520 |
| USF1      | -0.290947701 | 1.33E-11 | 8.78E-11 | 520 | 520 |
| COMMD4    | -0.290992739 | 1.32E-11 | 8.73E-11 | 520 | 520 |
| EIF4EBP3  | -0.291447984 | 1.22E-11 | 8.10E-11 | 520 | 520 |
| SFXN4     | -0.291465509 | 1.22E-11 | 8.08E-11 | 520 | 520 |
| FAM193B   | -0.291552038 | 1.20E-11 | 7.97E-11 | 520 | 520 |
| TREX1     | -0.291872048 | 1.14E-11 | 7.56E-11 | 520 | 520 |
| LYPD3     | -0.291982385 | 1.12E-11 | 7.43E-11 | 520 | 520 |
| ZFYVE19   | -0.292104189 | 1.09E-11 | 7.29E-11 | 520 | 520 |
| C16orf75  | -0.292527597 | 1.02E-11 | 6.80E-11 | 520 | 520 |
| NDUFB6    | -0.292822709 | 9.68E-12 | 6.48E-11 | 520 | 520 |

|          |              |          |          |     |     |
|----------|--------------|----------|----------|-----|-----|
| COX41    | -0.292825511 | 9.68E-12 | 6.48E-11 | 520 | 520 |
| SPRR2E   | -0.292847095 | 9.64E-12 | 6.46E-11 | 520 | 518 |
| CCDC120  | -0.292892997 | 9.57E-12 | 6.41E-11 | 520 | 520 |
| EPHA2    | -0.293102367 | 9.23E-12 | 6.20E-11 | 520 | 520 |
| C22orf32 | -0.293173487 | 9.12E-12 | 6.13E-11 | 520 | 520 |
| MIR17HG  | -0.293262942 | 8.99E-12 | 6.04E-11 | 520 | 518 |
| BAT1     | -0.293361247 | 8.84E-12 | 5.95E-11 | 520 | 520 |
| SCO2     | -0.293456016 | 8.70E-12 | 5.86E-11 | 520 | 520 |
| PSMA6    | -0.293459021 | 8.69E-12 | 5.86E-11 | 520 | 520 |
| LAD1     | -0.293516624 | 8.61E-12 | 5.80E-11 | 520 | 520 |
| RPL35    | -0.293566681 | 8.53E-12 | 5.76E-11 | 520 | 520 |
| PART1    | -0.293602849 | 8.48E-12 | 5.72E-11 | 520 | 500 |
| SSNA1    | -0.293752024 | 8.27E-12 | 5.59E-11 | 520 | 520 |
| HMGN1    | -0.293866833 | 8.11E-12 | 5.49E-11 | 520 | 520 |
| RPL35A   | -0.294045258 | 7.87E-12 | 5.33E-11 | 520 | 520 |
| C21orf15 | -0.294543181 | 7.23E-12 | 4.91E-11 | 520 | 361 |
| NDUFB5   | -0.294586673 | 7.18E-12 | 4.87E-11 | 520 | 520 |
| TSFM     | -0.294616847 | 7.14E-12 | 4.85E-11 | 520 | 520 |
| GPT2     | -0.294643457 | 7.11E-12 | 4.83E-11 | 520 | 520 |
| KRT4     | -0.294713596 | 7.02E-12 | 4.78E-11 | 520 | 518 |
| CDH26    | -0.294936891 | 6.76E-12 | 4.61E-11 | 520 | 520 |
| SFTA2    | -0.29517735  | 6.49E-12 | 4.43E-11 | 520 | 307 |
| C9orf40  | -0.295197177 | 6.47E-12 | 4.42E-11 | 520 | 520 |
| HOMEZ    | -0.295432434 | 6.21E-12 | 4.25E-11 | 520 | 520 |
| SEC22A   | -0.295564228 | 6.07E-12 | 4.16E-11 | 520 | 520 |
| EXPH5    | -0.295631253 | 6.00E-12 | 4.11E-11 | 520 | 520 |
| ANKRD9   | -0.295847715 | 5.79E-12 | 3.97E-11 | 520 | 520 |
| HLF      | -0.295848013 | 5.78E-12 | 3.97E-11 | 520 | 520 |
| GMNN     | -0.295905064 | 5.73E-12 | 3.93E-11 | 520 | 520 |
| ATP5D    | -0.296040611 | 5.60E-12 | 3.85E-11 | 520 | 520 |
| EXOSC5   | -0.296124095 | 5.52E-12 | 3.80E-11 | 520 | 520 |
| LUC7L3   | -0.296306996 | 5.35E-12 | 3.68E-11 | 520 | 520 |
| HSBP1L1  | -0.296341718 | 5.32E-12 | 3.66E-11 | 520 | 520 |
| ARV1     | -0.296380279 | 5.28E-12 | 3.64E-11 | 520 | 520 |
| MND1     | -0.296397199 | 5.27E-12 | 3.63E-11 | 520 | 520 |
| C9orf142 | -0.296506249 | 5.17E-12 | 3.56E-11 | 520 | 520 |
| OIP5     | -0.296559177 | 5.12E-12 | 3.54E-11 | 520 | 520 |
| C19orf39 | -0.296633113 | 5.06E-12 | 3.49E-11 | 520 | 520 |
| RPL39    | -0.296803125 | 4.91E-12 | 3.40E-11 | 520 | 520 |
| EBPL     | -0.296803356 | 4.91E-12 | 3.40E-11 | 520 | 520 |
| SS18L2   | -0.296839005 | 4.88E-12 | 3.38E-11 | 520 | 520 |
| SPINT1   | -0.296943064 | 4.79E-12 | 3.32E-11 | 520 | 520 |
| CCBL2    | -0.296952498 | 4.79E-12 | 3.32E-11 | 520 | 520 |
| TALDO1   | -0.296961308 | 4.78E-12 | 3.31E-11 | 520 | 520 |
| IL19     | -0.297060573 | 4.70E-12 | 3.26E-11 | 520 | 482 |
| ETFA     | -0.297182394 | 4.60E-12 | 3.20E-11 | 520 | 520 |

|              |              |          |          |     |     |
|--------------|--------------|----------|----------|-----|-----|
| POLR2H       | -0.297200638 | 4.59E-12 | 3.19E-11 | 520 | 520 |
| PPIH         | -0.297281642 | 4.52E-12 | 3.15E-11 | 520 | 520 |
| WDR8         | -0.297360475 | 4.46E-12 | 3.11E-11 | 520 | 520 |
| RCCD1        | -0.297408086 | 4.43E-12 | 3.08E-11 | 520 | 520 |
| EDF1         | -0.297551164 | 4.32E-12 | 3.01E-11 | 520 | 520 |
| SLC10A5      | -0.297612202 | 4.27E-12 | 2.98E-11 | 520 | 494 |
| CCHCR1       | -0.297780053 | 4.15E-12 | 2.90E-11 | 520 | 520 |
| SPPL3        | -0.297855495 | 4.10E-12 | 2.86E-11 | 520 | 520 |
| YTHDF2       | -0.29798101  | 4.01E-12 | 2.80E-11 | 520 | 520 |
| ZNF185       | -0.298147546 | 3.90E-12 | 2.72E-11 | 520 | 520 |
| CATSPER2     | -0.298525266 | 3.65E-12 | 2.56E-11 | 520 | 520 |
| CNTD1        | -0.29863037  | 3.58E-12 | 2.51E-11 | 520 | 520 |
| C6orf125     | -0.298665988 | 3.56E-12 | 2.50E-11 | 520 | 520 |
| SRRT         | -0.298919836 | 3.41E-12 | 2.39E-11 | 520 | 520 |
| EML2         | -0.298935129 | 3.40E-12 | 2.39E-11 | 520 | 520 |
| ATP5I        | -0.299086338 | 3.31E-12 | 2.33E-11 | 520 | 520 |
| TMEM183A     | -0.299165638 | 3.27E-12 | 2.30E-11 | 520 | 520 |
| PLIN5        | -0.299248855 | 3.22E-12 | 2.27E-11 | 520 | 513 |
| MRP63        | -0.299343253 | 3.17E-12 | 2.23E-11 | 520 | 520 |
| MFSD2B       | -0.299382332 | 3.15E-12 | 2.22E-11 | 520 | 520 |
| RAB3D        | -0.299400087 | 3.14E-12 | 2.21E-11 | 520 | 520 |
| BPNT1        | -0.299567574 | 3.05E-12 | 2.15E-11 | 520 | 520 |
| LOC100125556 | -0.299818161 | 2.92E-12 | 2.06E-11 | 520 | 520 |
| MRPL38       | -0.300046683 | 2.80E-12 | 1.99E-11 | 520 | 520 |
| CRNN         | -0.300054346 | 2.80E-12 | 1.99E-11 | 520 | 501 |
| SMARCD2      | -0.300379012 | 2.65E-12 | 1.88E-11 | 520 | 520 |
| C14orf156    | -0.300382277 | 2.64E-12 | 1.88E-11 | 520 | 520 |
| CCDC12       | -0.300484091 | 2.60E-12 | 1.85E-11 | 520 | 520 |
| TIPIN        | -0.300485259 | 2.60E-12 | 1.85E-11 | 520 | 520 |
| DEF6         | -0.300498233 | 2.59E-12 | 1.85E-11 | 520 | 520 |
| NRADDP       | -0.300619466 | 2.54E-12 | 1.81E-11 | 520 | 463 |
| ERBB2        | -0.30100012  | 2.37E-12 | 1.70E-11 | 520 | 520 |
| LSM5         | -0.301249872 | 2.27E-12 | 1.63E-11 | 520 | 520 |
| IDI1         | -0.301388738 | 2.22E-12 | 1.59E-11 | 520 | 520 |
| OGFOD2       | -0.301472801 | 2.19E-12 | 1.57E-11 | 520 | 520 |
| C17orf37     | -0.301550962 | 2.16E-12 | 1.55E-11 | 520 | 520 |
| LOC642587    | -0.301880356 | 2.03E-12 | 1.46E-11 | 520 | 520 |
| GSDMB        | -0.301982683 | 2.00E-12 | 1.44E-11 | 520 | 520 |
| CCDC137      | -0.302092443 | 1.96E-12 | 1.41E-11 | 520 | 520 |
| PIR          | -0.302181012 | 1.93E-12 | 1.39E-11 | 520 | 520 |
| MRPL20       | -0.30218606  | 1.93E-12 | 1.39E-11 | 520 | 520 |
| GOLGA2B      | -0.302216445 | 1.92E-12 | 1.38E-11 | 520 | 520 |
| PLEKHJ1      | -0.302217409 | 1.92E-12 | 1.38E-11 | 520 | 520 |
| MPZL2        | -0.302585465 | 1.80E-12 | 1.30E-11 | 520 | 520 |
| FAM3B        | -0.302636012 | 1.78E-12 | 1.29E-11 | 520 | 503 |
| HEBP2        | -0.303130346 | 1.63E-12 | 1.19E-11 | 520 | 520 |

|              |              |          |          |     |     |
|--------------|--------------|----------|----------|-----|-----|
| PRR15L       | -0.303142069 | 1.63E-12 | 1.18E-11 | 520 | 517 |
| NDUFA8       | -0.303177507 | 1.62E-12 | 1.18E-11 | 520 | 520 |
| SNRPA        | -0.303555482 | 1.52E-12 | 1.10E-11 | 520 | 520 |
| PTGES2       | -0.303669592 | 1.49E-12 | 1.08E-11 | 520 | 520 |
| MRPS34       | -0.303755065 | 1.46E-12 | 1.07E-11 | 520 | 520 |
| MAL          | -0.303784209 | 1.46E-12 | 1.06E-11 | 520 | 520 |
| ZBTB48       | -0.303803726 | 1.45E-12 | 1.06E-11 | 520 | 520 |
| APOBEC3A     | -0.303842456 | 1.44E-12 | 1.05E-11 | 520 | 520 |
| SYF2         | -0.304388215 | 1.31E-12 | 9.59E-12 | 520 | 520 |
| C19orf48     | -0.304471499 | 1.29E-12 | 9.46E-12 | 520 | 520 |
| KIAA0101     | -0.304488233 | 1.29E-12 | 9.44E-12 | 520 | 520 |
| COASY        | -0.30457033  | 1.27E-12 | 9.31E-12 | 520 | 520 |
| GCH1         | -0.304728836 | 1.23E-12 | 9.06E-12 | 520 | 520 |
| ID1          | -0.304729957 | 1.23E-12 | 9.06E-12 | 520 | 520 |
| PPIL5        | -0.304758746 | 1.23E-12 | 9.02E-12 | 520 | 520 |
| SPINK7       | -0.304949234 | 1.18E-12 | 8.73E-12 | 520 | 476 |
| NBEAL2       | -0.304975903 | 1.18E-12 | 8.69E-12 | 520 | 520 |
| IER2         | -0.305027943 | 1.17E-12 | 8.62E-12 | 520 | 520 |
| TRIM11       | -0.30508664  | 1.16E-12 | 8.53E-12 | 520 | 520 |
| C9orf23      | -0.305096493 | 1.15E-12 | 8.52E-12 | 520 | 520 |
| TMEM45B      | -0.305195102 | 1.13E-12 | 8.38E-12 | 520 | 520 |
| ARF6         | -0.305351222 | 1.10E-12 | 8.15E-12 | 520 | 520 |
| PSMA3        | -0.305434422 | 1.09E-12 | 8.04E-12 | 520 | 520 |
| C1orf151     | -0.305581419 | 1.06E-12 | 7.84E-12 | 520 | 520 |
| CAPNS2       | -0.305760012 | 1.03E-12 | 7.60E-12 | 520 | 518 |
| CCDC51       | -0.305809025 | 1.02E-12 | 7.54E-12 | 520 | 520 |
| REN          | -0.305850436 | 1.01E-12 | 7.49E-12 | 520 | 351 |
| PRDX2        | -0.305974447 | 9.87E-13 | 7.34E-12 | 520 | 520 |
| MED18        | -0.30619852  | 9.49E-13 | 7.06E-12 | 520 | 520 |
| COMTD1       | -0.306254911 | 9.39E-13 | 6.99E-12 | 520 | 520 |
| SARNP        | -0.306296039 | 9.32E-13 | 6.94E-12 | 520 | 520 |
| EPS8L2       | -0.306360935 | 9.22E-13 | 6.87E-12 | 520 | 520 |
| GCNT3        | -0.306364974 | 9.21E-13 | 6.87E-12 | 520 | 518 |
| ESRRA        | -0.306438319 | 9.09E-13 | 6.78E-12 | 520 | 520 |
| CYP2C9       | -0.306449229 | 9.07E-13 | 6.77E-12 | 520 | 409 |
| TPRXL        | -0.30645949  | 9.06E-13 | 6.76E-12 | 520 | 518 |
| LOC100130691 | -0.306480642 | 9.02E-13 | 6.74E-12 | 520 | 520 |
| C10orf116    | -0.306554195 | 8.90E-13 | 6.66E-12 | 520 | 520 |
| CYP2D6       | -0.30682418  | 8.49E-13 | 6.35E-12 | 520 | 517 |
| EPHX3        | -0.306834567 | 8.47E-13 | 6.34E-12 | 520 | 520 |
| SPRR2D       | -0.306931038 | 8.32E-13 | 6.24E-12 | 520 | 520 |
| THOC1        | -0.307405282 | 7.65E-13 | 5.75E-12 | 520 | 520 |
| LOC643387    | -0.307405824 | 7.65E-13 | 5.75E-12 | 520 | 520 |
| GEMIN8P4     | -0.307448241 | 7.59E-13 | 5.71E-12 | 520 | 520 |
| RAD9B        | -0.307605674 | 7.38E-13 | 5.55E-12 | 520 | 520 |
| SDHB         | -0.307624229 | 7.35E-13 | 5.54E-12 | 520 | 520 |

|           |              |          |          |     |     |
|-----------|--------------|----------|----------|-----|-----|
| PRSS8     | -0.307788358 | 7.14E-13 | 5.38E-12 | 520 | 520 |
| DNAJC9    | -0.307794785 | 7.13E-13 | 5.38E-12 | 520 | 520 |
| PRPSAP2   | -0.308059473 | 6.80E-13 | 5.14E-12 | 520 | 520 |
| DNAJC19   | -0.308139203 | 6.71E-13 | 5.08E-12 | 520 | 520 |
| C15orf63  | -0.308172019 | 6.67E-13 | 5.05E-12 | 520 | 520 |
| SLC25A28  | -0.30818976  | 6.64E-13 | 5.04E-12 | 520 | 520 |
| ZNF692    | -0.308640682 | 6.13E-13 | 4.66E-12 | 520 | 520 |
| ANKRD22   | -0.308645554 | 6.12E-13 | 4.66E-12 | 520 | 520 |
| GPR144    | -0.308730634 | 6.03E-13 | 4.59E-12 | 520 | 437 |
| ATP5F1    | -0.308734301 | 6.03E-13 | 4.59E-12 | 520 | 520 |
| PPL       | -0.308806486 | 5.95E-13 | 4.53E-12 | 520 | 520 |
| NARFL     | -0.308901324 | 5.85E-13 | 4.46E-12 | 520 | 520 |
| NDUFA2    | -0.308945863 | 5.80E-13 | 4.43E-12 | 520 | 520 |
| ATG3      | -0.309088591 | 5.65E-13 | 4.32E-12 | 520 | 520 |
| C6orf203  | -0.309357976 | 5.39E-13 | 4.12E-12 | 520 | 520 |
| MRPL39    | -0.309587163 | 5.17E-13 | 3.96E-12 | 520 | 520 |
| GOLGA6L9  | -0.309660597 | 5.10E-13 | 3.91E-12 | 520 | 520 |
| TMC5      | -0.309848414 | 4.93E-13 | 3.79E-12 | 520 | 517 |
| ACSS2     | -0.30998274  | 4.81E-13 | 3.70E-12 | 520 | 520 |
| TUBB8     | -0.310185651 | 4.64E-13 | 3.57E-12 | 520 | 519 |
| TIGD3     | -0.310213008 | 4.61E-13 | 3.56E-12 | 520 | 520 |
| LOC389791 | -0.310555883 | 4.34E-13 | 3.35E-12 | 520 | 486 |
| TRAP1     | -0.310665119 | 4.25E-13 | 3.28E-12 | 520 | 520 |
| NDUFS7    | -0.310855946 | 4.11E-13 | 3.18E-12 | 520 | 520 |
| RHBG      | -0.310928173 | 4.05E-13 | 3.14E-12 | 520 | 476 |
| DQX1      | -0.311337237 | 3.76E-13 | 2.92E-12 | 520 | 520 |
| C3orf1    | -0.311362769 | 3.75E-13 | 2.91E-12 | 520 | 520 |
| PCP4L1    | -0.311389106 | 3.73E-13 | 2.90E-12 | 520 | 506 |
| ING2      | -0.311423824 | 3.70E-13 | 2.88E-12 | 520 | 520 |
| POLR2I    | -0.312140381 | 3.25E-13 | 2.54E-12 | 520 | 520 |
| PSMA4     | -0.312147332 | 3.25E-13 | 2.54E-12 | 520 | 520 |
| TEX101    | -0.31219007  | 3.22E-13 | 2.52E-12 | 520 | 439 |
| ATP5B     | -0.312280824 | 3.17E-13 | 2.48E-12 | 520 | 520 |
| NOP16     | -0.312417562 | 3.09E-13 | 2.42E-12 | 520 | 520 |
| LIN7B     | -0.312563117 | 3.01E-13 | 2.36E-12 | 520 | 520 |
| NHP2      | -0.312604927 | 2.99E-13 | 2.34E-12 | 520 | 520 |
| GRAMD1C   | -0.31265477  | 2.96E-13 | 2.32E-12 | 520 | 520 |
| CEBPA     | -0.312773037 | 2.90E-13 | 2.27E-12 | 520 | 520 |
| CCDC59    | -0.312791536 | 2.89E-13 | 2.27E-12 | 520 | 520 |
| S100P     | -0.312890212 | 2.84E-13 | 2.23E-12 | 520 | 520 |
| WDR53     | -0.312937297 | 2.81E-13 | 2.21E-12 | 520 | 520 |
| S100A16   | -0.313154454 | 2.70E-13 | 2.13E-12 | 520 | 520 |
| PRPF38A   | -0.313161526 | 2.70E-13 | 2.13E-12 | 520 | 520 |
| LY6D      | -0.31341888  | 2.57E-13 | 2.03E-12 | 520 | 520 |
| CEACAM5   | -0.313525575 | 2.52E-13 | 1.99E-12 | 520 | 518 |
| U2AF1     | -0.313564216 | 2.51E-13 | 1.98E-12 | 520 | 520 |

|            |              |          |          |     |     |
|------------|--------------|----------|----------|-----|-----|
| TSSC1      | -0.313728829 | 2.43E-13 | 1.93E-12 | 520 | 520 |
| ST6GALNAC1 | -0.31379724  | 2.40E-13 | 1.91E-12 | 520 | 520 |
| CALML5     | -0.313869706 | 2.37E-13 | 1.88E-12 | 520 | 517 |
| RNF141     | -0.314285939 | 2.20E-13 | 1.75E-12 | 520 | 520 |
| C2orf54    | -0.314305598 | 2.19E-13 | 1.74E-12 | 520 | 517 |
| GTF2A2     | -0.314318288 | 2.18E-13 | 1.74E-12 | 520 | 520 |
| CCDC42B    | -0.314393568 | 2.15E-13 | 1.72E-12 | 520 | 517 |
| RPL22      | -0.314471511 | 2.12E-13 | 1.69E-12 | 520 | 520 |
| C17orf42   | -0.314519114 | 2.10E-13 | 1.68E-12 | 520 | 520 |
| ITGB3BP    | -0.315294253 | 1.82E-13 | 1.46E-12 | 520 | 520 |
| APOM       | -0.315399488 | 1.79E-13 | 1.44E-12 | 520 | 520 |
| ANP32B     | -0.315544507 | 1.74E-13 | 1.40E-12 | 520 | 520 |
| VNN3       | -0.315650608 | 1.71E-13 | 1.38E-12 | 520 | 515 |
| OXNAD1     | -0.315757841 | 1.67E-13 | 1.35E-12 | 520 | 520 |
| SLC34A1    | -0.315859906 | 1.64E-13 | 1.32E-12 | 520 | 478 |
| SMPD2      | -0.315906733 | 1.63E-13 | 1.31E-12 | 520 | 520 |
| ZBTB8OS    | -0.316137178 | 1.56E-13 | 1.26E-12 | 520 | 520 |
| UQCRFS1    | -0.316264122 | 1.52E-13 | 1.23E-12 | 520 | 520 |
| C18orf26   | -0.316408841 | 1.48E-13 | 1.20E-12 | 520 | 363 |
| KLF4       | -0.316479019 | 1.47E-13 | 1.19E-12 | 520 | 520 |
| C9orf68    | -0.316486389 | 1.46E-13 | 1.19E-12 | 520 | 520 |
| INO80C     | -0.316626966 | 1.43E-13 | 1.16E-12 | 520 | 520 |
| TSPO       | -0.316890935 | 1.36E-13 | 1.10E-12 | 520 | 520 |
| SDR16C5    | -0.317098895 | 1.31E-13 | 1.06E-12 | 520 | 520 |
| ACAD9      | -0.317342781 | 1.25E-13 | 1.02E-12 | 520 | 520 |
| MRPS18A    | -0.31748651  | 1.22E-13 | 9.93E-13 | 520 | 520 |
| RASSF7     | -0.317863834 | 1.13E-13 | 9.28E-13 | 520 | 520 |
| NUP62CL    | -0.317881584 | 1.13E-13 | 9.26E-13 | 520 | 520 |
| RAC1       | -0.317941211 | 1.12E-13 | 9.16E-13 | 520 | 520 |
| PRRG2      | -0.318055683 | 1.09E-13 | 8.98E-13 | 520 | 520 |
| SLC25A23   | -0.31830498  | 1.04E-13 | 8.59E-13 | 520 | 520 |
| COX6B1     | -0.31888534  | 9.36E-14 | 7.73E-13 | 520 | 520 |
| PHKG2      | -0.318895917 | 9.35E-14 | 7.72E-13 | 520 | 520 |
| WRNIP1     | -0.318996594 | 9.17E-14 | 7.58E-13 | 520 | 520 |
| LASS4      | -0.319263137 | 8.73E-14 | 7.23E-13 | 520 | 520 |
| CNBP       | -0.319430566 | 8.46E-14 | 7.01E-13 | 520 | 520 |
| CIDEB      | -0.319460147 | 8.41E-14 | 6.98E-13 | 520 | 520 |
| BNIPL      | -0.319669322 | 8.09E-14 | 6.72E-13 | 520 | 520 |
| DCST2      | -0.319748466 | 7.97E-14 | 6.63E-13 | 520 | 517 |
| DUOXA1     | -0.31977616  | 7.93E-14 | 6.60E-13 | 520 | 520 |
| IL20RA     | -0.319964605 | 7.65E-14 | 6.38E-13 | 520 | 520 |
| MAGOH      | -0.319978907 | 7.63E-14 | 6.36E-13 | 520 | 520 |
| PLA2G3     | -0.32000866  | 7.59E-14 | 6.33E-13 | 520 | 502 |
| BTF3       | -0.320061418 | 7.51E-14 | 6.28E-13 | 520 | 520 |
| ZNF750     | -0.3205812   | 6.81E-14 | 5.71E-13 | 520 | 519 |
| LOC80154   | -0.3207444   | 6.61E-14 | 5.54E-13 | 520 | 520 |

|           |              |          |          |     |     |
|-----------|--------------|----------|----------|-----|-----|
| S100A12   | -0.320807133 | 6.53E-14 | 5.48E-13 | 520 | 520 |
| FAM100B   | -0.320952309 | 6.35E-14 | 5.34E-13 | 520 | 520 |
| MRPS22    | -0.321154694 | 6.12E-14 | 5.15E-13 | 520 | 520 |
| PMF1      | -0.321154932 | 6.12E-14 | 5.15E-13 | 520 | 520 |
| NOXO1     | -0.32121674  | 6.05E-14 | 5.10E-13 | 520 | 520 |
| DLG3      | -0.321262916 | 5.99E-14 | 5.06E-13 | 520 | 520 |
| ELL3      | -0.321269083 | 5.99E-14 | 5.05E-13 | 520 | 520 |
| GSTP1     | -0.321417564 | 5.82E-14 | 4.92E-13 | 520 | 520 |
| MREG      | -0.321574936 | 5.65E-14 | 4.78E-13 | 520 | 520 |
| RAD9A     | -0.321854936 | 5.36E-14 | 4.54E-13 | 520 | 520 |
| FA2H      | -0.321967608 | 5.25E-14 | 4.45E-13 | 520 | 518 |
| SLC13A4   | -0.322012982 | 5.20E-14 | 4.42E-13 | 520 | 518 |
| OMA1      | -0.322110773 | 5.11E-14 | 4.34E-13 | 520 | 520 |
| LOC113230 | -0.322592592 | 4.66E-14 | 3.98E-13 | 520 | 520 |
| STRA13    | -0.322832699 | 4.45E-14 | 3.80E-13 | 520 | 520 |
| CBLC      | -0.322845874 | 4.44E-14 | 3.79E-13 | 520 | 519 |
| LIPH      | -0.323052738 | 4.27E-14 | 3.66E-13 | 520 | 519 |
| ACYP1     | -0.323098447 | 4.23E-14 | 3.63E-13 | 520 | 520 |
| CCDC125   | -0.32318622  | 4.16E-14 | 3.57E-13 | 520 | 520 |
| KIAA1543  | -0.323441527 | 3.97E-14 | 3.40E-13 | 520 | 520 |
| FDFT1     | -0.324014412 | 3.56E-14 | 3.06E-13 | 520 | 520 |
| SURF2     | -0.32405959  | 3.53E-14 | 3.03E-13 | 520 | 520 |
| APTX      | -0.324141652 | 3.47E-14 | 2.99E-13 | 520 | 520 |
| RBM8A     | -0.32449011  | 3.25E-14 | 2.80E-13 | 520 | 520 |
| TGM3      | -0.32450957  | 3.24E-14 | 2.79E-13 | 520 | 519 |
| TUBD1     | -0.324514962 | 3.23E-14 | 2.79E-13 | 520 | 520 |
| SNRPD1    | -0.324519978 | 3.23E-14 | 2.79E-13 | 520 | 520 |
| SREBF1    | -0.324605765 | 3.18E-14 | 2.75E-13 | 520 | 520 |
| CEACAM1   | -0.324890619 | 3.01E-14 | 2.61E-13 | 520 | 520 |
| NSMCE4A   | -0.324937522 | 2.98E-14 | 2.59E-13 | 520 | 520 |
| RARG      | -0.325187435 | 2.84E-14 | 2.47E-13 | 520 | 520 |
| WDR34     | -0.325531532 | 2.66E-14 | 2.32E-13 | 520 | 520 |
| EMP2      | -0.325604002 | 2.63E-14 | 2.29E-13 | 520 | 520 |
| ATPIF1    | -0.325956481 | 2.45E-14 | 2.15E-13 | 520 | 520 |
| CENPW     | -0.326101326 | 2.39E-14 | 2.09E-13 | 520 | 520 |
| DTX2      | -0.326260121 | 2.32E-14 | 2.03E-13 | 520 | 520 |
| PTTG1     | -0.326399526 | 2.25E-14 | 1.98E-13 | 520 | 520 |
| ZBTB7B    | -0.326554073 | 2.19E-14 | 1.92E-13 | 520 | 520 |
| CRYBB3    | -0.327022644 | 2.00E-14 | 1.76E-13 | 520 | 463 |
| IL1F6     | -0.327757688 | 1.73E-14 | 1.53E-13 | 520 | 426 |
| ZNF165    | -0.328020621 | 1.65E-14 | 1.46E-13 | 520 | 520 |
| NSUN6     | -0.328026161 | 1.65E-14 | 1.46E-13 | 520 | 520 |
| RPL24     | -0.328067422 | 1.63E-14 | 1.45E-13 | 520 | 520 |
| OSTF1     | -0.328251566 | 1.58E-14 | 1.40E-13 | 520 | 520 |
| NDUFA7    | -0.328797703 | 1.42E-14 | 1.26E-13 | 520 | 520 |
| TMEM184A  | -0.328917248 | 1.39E-14 | 1.23E-13 | 520 | 520 |

|          |              |          |          |     |     |
|----------|--------------|----------|----------|-----|-----|
| SFRS3    | -0.328946145 | 1.38E-14 | 1.23E-13 | 520 | 520 |
| INPP1    | -0.329030625 | 1.36E-14 | 1.21E-13 | 520 | 520 |
| TMEM41A  | -0.329093256 | 1.34E-14 | 1.20E-13 | 520 | 520 |
| CNFN     | -0.329148548 | 1.33E-14 | 1.18E-13 | 520 | 520 |
| H3F3A    | -0.329400951 | 1.26E-14 | 1.13E-13 | 520 | 520 |
| TRAPPC3  | -0.329679701 | 1.20E-14 | 1.08E-13 | 520 | 520 |
| C21orf45 | -0.329794303 | 1.17E-14 | 1.05E-13 | 520 | 520 |
| SLC26A9  | -0.329917216 | 1.14E-14 | 1.03E-13 | 520 | 519 |
| PRODH    | -0.330044961 | 1.11E-14 | 1.01E-13 | 520 | 520 |
| NDUFAB1  | -0.330810004 | 9.59E-15 | 8.72E-14 | 520 | 520 |
| MXD3     | -0.331001749 | 9.24E-15 | 8.40E-14 | 520 | 520 |
| RPP21    | -0.331178223 | 8.92E-15 | 8.13E-14 | 520 | 520 |
| KLB      | -0.331213455 | 8.86E-15 | 8.08E-14 | 520 | 507 |
| ANXA9    | -0.33121399  | 8.86E-15 | 8.08E-14 | 520 | 520 |
| SCNN1A   | -0.331390787 | 8.56E-15 | 7.82E-14 | 520 | 520 |
| C14orf2  | -0.331582778 | 8.24E-15 | 7.54E-14 | 520 | 520 |
| DCXR     | -0.331689972 | 8.07E-15 | 7.39E-14 | 520 | 520 |
| GOT1     | -0.33169667  | 8.06E-15 | 7.38E-14 | 520 | 520 |
| ZNF823   | -0.332271025 | 7.20E-15 | 6.62E-14 | 520 | 520 |
| ECHS1    | -0.332726429 | 6.59E-15 | 6.07E-14 | 520 | 520 |
| COX6C    | -0.332902552 | 6.36E-15 | 5.87E-14 | 520 | 520 |
| KIAA1468 | -0.333348789 | 5.83E-15 | 5.40E-14 | 520 | 520 |
| PPCDC    | -0.333955609 | 5.17E-15 | 4.81E-14 | 520 | 520 |
| PGAP2    | -0.334142921 | 4.98E-15 | 4.64E-14 | 520 | 520 |
| BAIAP2   | -0.334165585 | 4.96E-15 | 4.62E-14 | 520 | 520 |
| G RTP1   | -0.334205766 | 4.92E-15 | 4.59E-14 | 520 | 520 |
| C9orf3   | -0.33428155  | 4.85E-15 | 4.53E-14 | 520 | 520 |
| CADM4    | -0.334514676 | 4.63E-15 | 4.33E-14 | 520 | 520 |
| C7orf40  | -0.334530926 | 4.61E-15 | 4.31E-14 | 520 | 520 |
| SH2D4A   | -0.334571344 | 4.58E-15 | 4.28E-14 | 520 | 520 |
| ACE2     | -0.334743878 | 4.42E-15 | 4.15E-14 | 520 | 519 |
| C1orf77  | -0.335166527 | 4.07E-15 | 3.83E-14 | 520 | 520 |
| OVOL2    | -0.335233468 | 4.01E-15 | 3.79E-14 | 520 | 519 |
| KAZ      | -0.335490765 | 3.81E-15 | 3.60E-14 | 520 | 520 |
| TMEM41B  | -0.335547896 | 3.77E-15 | 3.57E-14 | 520 | 520 |
| KRT13    | -0.335559295 | 3.76E-15 | 3.56E-14 | 520 | 520 |
| SNRNP35  | -0.335592355 | 3.74E-15 | 3.54E-14 | 520 | 520 |
| CBR3     | -0.335617973 | 3.72E-15 | 3.52E-14 | 520 | 520 |
| C21orf59 | -0.335620307 | 3.72E-15 | 3.52E-14 | 520 | 520 |
| DUOX2    | -0.335781712 | 3.60E-15 | 3.41E-14 | 520 | 520 |
| MRPL22   | -0.336081632 | 3.39E-15 | 3.22E-14 | 520 | 520 |
| SPINK5   | -0.336199924 | 3.31E-15 | 3.15E-14 | 520 | 520 |
| CARHSP1  | -0.33645344  | 3.15E-15 | 3.01E-14 | 520 | 520 |
| MUC21    | -0.337075735 | 2.78E-15 | 2.66E-14 | 520 | 471 |
| TXN      | -0.33710023  | 2.77E-15 | 2.65E-14 | 520 | 520 |
| NDUFB1   | -0.337500767 | 2.55E-15 | 2.46E-14 | 520 | 520 |



|              |              |          |          |     |     |
|--------------|--------------|----------|----------|-----|-----|
| FH           | -0.337515547 | 2.55E-15 | 2.45E-14 | 520 | 520 |
| TNFRSF25     | -0.3376541   | 2.48E-15 | 2.38E-14 | 520 | 520 |
| CYP2C18      | -0.338026272 | 2.30E-15 | 2.22E-14 | 520 | 515 |
| TBC1D3       | -0.338130689 | 2.25E-15 | 2.18E-14 | 520 | 520 |
| DYNLL1       | -0.33816802  | 2.23E-15 | 2.16E-14 | 520 | 520 |
| DHRS13       | -0.338665052 | 2.02E-15 | 1.97E-14 | 520 | 520 |
| TMPRSS11BNL  | -0.338720479 | 2.00E-15 | 1.95E-14 | 520 | 348 |
| CLCA3P       | -0.338974548 | 1.90E-15 | 1.85E-14 | 520 | 481 |
| CNKSRI       | -0.339246699 | 1.80E-15 | 1.76E-14 | 520 | 520 |
| C9orf156     | -0.339313797 | 1.77E-15 | 1.73E-14 | 520 | 520 |
| LOC254559    | -0.339418433 | 1.74E-15 | 1.70E-14 | 520 | 520 |
| LYSMD4       | -0.339715284 | 1.64E-15 | 1.61E-14 | 520 | 520 |
| PPFIA3       | -0.339717809 | 1.64E-15 | 1.61E-14 | 520 | 520 |
| LTB4R2       | -0.339800781 | 1.61E-15 | 1.58E-14 | 520 | 520 |
| IL1RN        | -0.339857275 | 1.59E-15 | 1.57E-14 | 520 | 520 |
| NACA         | -0.340020413 | 1.54E-15 | 1.52E-14 | 520 | 520 |
| CCDC58       | -0.340167592 | 1.49E-15 | 1.48E-14 | 520 | 520 |
| SMUG1        | -0.34046687  | 1.41E-15 | 1.39E-14 | 520 | 520 |
| ICT1         | -0.34078695  | 1.32E-15 | 1.30E-14 | 520 | 520 |
| MUC1         | -0.341009583 | 1.26E-15 | 1.25E-14 | 520 | 520 |
| POLE2        | -0.341413523 | 1.16E-15 | 1.15E-14 | 520 | 520 |
| DHRS11       | -0.341465565 | 1.15E-15 | 1.14E-14 | 520 | 520 |
| TPRG1        | -0.341496893 | 1.14E-15 | 1.14E-14 | 520 | 520 |
| USMG5        | -0.342186418 | 9.92E-16 | 9.90E-15 | 520 | 520 |
| ANO9         | -0.342958139 | 8.47E-16 | 8.49E-15 | 520 | 520 |
| SPRR2C       | -0.34328253  | 7.93E-16 | 7.95E-15 | 520 | 514 |
| ATP5J        | -0.343311972 | 7.88E-16 | 7.90E-15 | 520 | 520 |
| TCHP         | -0.343351586 | 7.82E-16 | 7.85E-15 | 520 | 520 |
| SNRPA1       | -0.343372001 | 7.79E-16 | 7.82E-15 | 520 | 520 |
| NDUFB4       | -0.343396915 | 7.75E-16 | 7.79E-15 | 520 | 520 |
| LRRC56       | -0.343487303 | 7.60E-16 | 7.66E-15 | 520 | 520 |
| CYP4F12      | -0.343552964 | 7.50E-16 | 7.56E-15 | 520 | 498 |
| FDPS         | -0.343700749 | 7.28E-16 | 7.34E-15 | 520 | 520 |
| C1orf35      | -0.343738986 | 7.22E-16 | 7.29E-15 | 520 | 520 |
| NDUFB3       | -0.343845875 | 7.07E-16 | 7.14E-15 | 520 | 520 |
| LOC100130932 | -0.34385654  | 7.05E-16 | 7.13E-15 | 520 | 520 |
| DAZAP1       | -0.343921968 | 6.96E-16 | 7.04E-15 | 520 | 520 |
| EZH2         | -0.34392887  | 6.95E-16 | 7.03E-15 | 520 | 520 |
| PHLDB3       | -0.345044224 | 5.53E-16 | 5.63E-15 | 520 | 520 |
| FKBP1        | -0.345100467 | 5.46E-16 | 5.57E-15 | 520 | 520 |
| MRPS36       | -0.345592926 | 4.94E-16 | 5.05E-15 | 520 | 520 |
| CLCA4        | -0.345889453 | 4.64E-16 | 4.77E-15 | 520 | 517 |
| S100A11      | -0.345901505 | 4.63E-16 | 4.76E-15 | 520 | 520 |
| ZMYND19      | -0.346120154 | 4.43E-16 | 4.56E-15 | 520 | 520 |
| ENDOG        | -0.346344581 | 4.23E-16 | 4.36E-15 | 520 | 520 |
| CEACAM7      | -0.346935942 | 3.74E-16 | 3.88E-15 | 520 | 462 |

|           |              |          |          |     |     |
|-----------|--------------|----------|----------|-----|-----|
| UMPS      | -0.34728897  | 3.48E-16 | 3.61E-15 | 520 | 520 |
| ATG9B     | -0.347357781 | 3.43E-16 | 3.56E-15 | 520 | 520 |
| TMPRSS11A | -0.347388115 | 3.40E-16 | 3.54E-15 | 520 | 514 |
| MRPS25    | -0.347493503 | 3.33E-16 | 3.47E-15 | 520 | 520 |
| PMVK      | -0.347624432 | 3.24E-16 | 3.38E-15 | 520 | 520 |
| HSPB1     | -0.347781211 | 3.14E-16 | 3.27E-15 | 520 | 520 |
| ANXA1     | -0.348029357 | 2.98E-16 | 3.12E-15 | 520 | 520 |
| PPA2      | -0.348427498 | 2.74E-16 | 2.88E-15 | 520 | 520 |
| FRAT2     | -0.348470105 | 2.72E-16 | 2.86E-15 | 520 | 520 |
| HSD17B8   | -0.348686223 | 2.60E-16 | 2.74E-15 | 520 | 520 |
| LSM3      | -0.348984695 | 2.44E-16 | 2.58E-15 | 520 | 520 |
| PRDX1     | -0.349008159 | 2.43E-16 | 2.57E-15 | 520 | 520 |
| ARHGEF16  | -0.34912616  | 2.37E-16 | 2.51E-15 | 520 | 520 |
| MRPS9     | -0.349556492 | 2.17E-16 | 2.30E-15 | 520 | 520 |
| ALG1L     | -0.349586949 | 2.15E-16 | 2.29E-15 | 520 | 520 |
| CHCHD1    | -0.349671376 | 2.12E-16 | 2.25E-15 | 520 | 520 |
| RAB24     | -0.349686945 | 2.11E-16 | 2.25E-15 | 520 | 520 |
| LRG1      | -0.34972553  | 2.09E-16 | 2.23E-15 | 520 | 520 |
| LYPD2     | -0.349801413 | 2.06E-16 | 2.20E-15 | 520 | 492 |
| RG9MTD1   | -0.350020621 | 1.97E-16 | 2.10E-15 | 520 | 520 |
| ARPC5L    | -0.350317238 | 1.85E-16 | 1.98E-15 | 520 | 520 |
| CKMT1B    | -0.350400696 | 1.82E-16 | 1.95E-15 | 520 | 518 |
| SPRR1A    | -0.350433735 | 1.80E-16 | 1.94E-15 | 520 | 520 |
| NOL12     | -0.350961846 | 1.61E-16 | 1.74E-15 | 520 | 520 |
| HMGN3     | -0.351239099 | 1.52E-16 | 1.65E-15 | 520 | 520 |
| TMEM40    | -0.351368207 | 1.48E-16 | 1.60E-15 | 520 | 520 |
| RDH13     | -0.351518205 | 1.44E-16 | 1.56E-15 | 520 | 520 |
| MALL      | -0.351866797 | 1.33E-16 | 1.45E-15 | 520 | 520 |
| SLC34A3   | -0.352403426 | 1.19E-16 | 1.30E-15 | 520 | 499 |
| EVPLL     | -0.352405091 | 1.19E-16 | 1.30E-15 | 520 | 516 |
| VDAC2     | -0.352499495 | 1.17E-16 | 1.28E-15 | 520 | 520 |
| ERI2      | -0.35257317  | 1.15E-16 | 1.26E-15 | 520 | 520 |
| GRHL3     | -0.352583098 | 1.15E-16 | 1.26E-15 | 520 | 519 |
| DEFB1     | -0.352849151 | 1.08E-16 | 1.19E-15 | 520 | 519 |
| NCCRP1    | -0.352982883 | 1.05E-16 | 1.16E-15 | 520 | 520 |
| COQ3      | -0.353012043 | 1.05E-16 | 1.15E-15 | 520 | 520 |
| C20orf24  | -0.353612922 | 9.23E-17 | 1.02E-15 | 520 | 520 |
| NUDT5     | -0.35401296  | 8.48E-17 | 9.35E-16 | 520 | 520 |
| MUC20     | -0.354159796 | 8.22E-17 | 9.09E-16 | 520 | 520 |
| EPS8L1    | -0.354350395 | 7.89E-17 | 8.75E-16 | 520 | 520 |
| TMEM80    | -0.354376761 | 7.85E-17 | 8.70E-16 | 520 | 520 |
| PDSS1     | -0.354773582 | 7.21E-17 | 8.01E-16 | 520 | 520 |
| RGS14     | -0.354807525 | 7.16E-17 | 7.96E-16 | 520 | 520 |
| TMPRSS11B | -0.355437826 | 6.26E-17 | 7.00E-16 | 520 | 453 |
| CLDN4     | -0.355996505 | 5.55E-17 | 6.23E-16 | 520 | 520 |
| KLF5      | -0.356162023 | 5.36E-17 | 6.02E-16 | 520 | 520 |

|          |              |          |          |     |     |
|----------|--------------|----------|----------|-----|-----|
| RASAL1   | -0.35616394  | 5.36E-17 | 6.02E-16 | 520 | 520 |
| MRPS18C  | -0.356198172 | 5.32E-17 | 5.98E-16 | 520 | 520 |
| COX7A2   | -0.356566164 | 4.92E-17 | 5.55E-16 | 520 | 520 |
| C19orf57 | -0.35684657  | 4.63E-17 | 5.25E-16 | 520 | 520 |
| COQ4     | -0.356922217 | 4.55E-17 | 5.17E-16 | 520 | 520 |
| XPA      | -0.357691593 | 3.86E-17 | 4.39E-16 | 520 | 520 |
| MRPL46   | -0.357943829 | 3.66E-17 | 4.16E-16 | 520 | 520 |
| COX5B    | -0.358080751 | 3.55E-17 | 4.05E-16 | 520 | 520 |
| TMEM54   | -0.358155187 | 3.49E-17 | 3.99E-16 | 520 | 520 |
| AIF1L    | -0.358460668 | 3.27E-17 | 3.74E-16 | 520 | 520 |
| GRHL1    | -0.358499983 | 3.24E-17 | 3.71E-16 | 520 | 520 |
| ARHGAP27 | -0.358869873 | 2.99E-17 | 3.43E-16 | 520 | 520 |
| C21orf63 | -0.359125399 | 2.83E-17 | 3.26E-16 | 520 | 520 |
| DCLRE1C  | -0.359169933 | 2.81E-17 | 3.23E-16 | 520 | 520 |
| PAOX     | -0.359312374 | 2.72E-17 | 3.14E-16 | 520 | 520 |
| ALDH3A1  | -0.359662411 | 2.52E-17 | 2.93E-16 | 520 | 520 |
| MKMK2    | -0.359679301 | 2.51E-17 | 2.92E-16 | 520 | 520 |
| ATP13A4  | -0.359743593 | 2.48E-17 | 2.89E-16 | 520 | 504 |
| SPRR2F   | -0.360166334 | 2.26E-17 | 2.64E-16 | 520 | 511 |
| TMPRSS4  | -0.361379729 | 1.74E-17 | 2.04E-16 | 520 | 520 |
| COX7C    | -0.3613813   | 1.74E-17 | 2.04E-16 | 520 | 520 |
| ZDHHC13  | -0.362212848 | 1.45E-17 | 1.72E-16 | 520 | 520 |
| KIF22    | -0.362220858 | 1.45E-17 | 1.72E-16 | 520 | 520 |
| UQCRQ    | -0.362514657 | 1.36E-17 | 1.62E-16 | 520 | 520 |
| AIM1L    | -0.362935076 | 1.24E-17 | 1.48E-16 | 520 | 520 |
| SERPINB1 | -0.362985328 | 1.22E-17 | 1.47E-16 | 520 | 520 |
| PDZK1IP1 | -0.363328592 | 1.13E-17 | 1.36E-16 | 520 | 520 |
| SPRR2A   | -0.363466934 | 1.10E-17 | 1.32E-16 | 520 | 520 |
| PA2G4    | -0.36425087  | 9.26E-18 | 1.12E-16 | 520 | 520 |
| TM7SF2   | -0.36502894  | 7.80E-18 | 9.48E-17 | 520 | 520 |
| OVOL1    | -0.365378988 | 7.22E-18 | 8.79E-17 | 520 | 519 |
| CATSPER3 | -0.365459083 | 7.09E-18 | 8.64E-17 | 520 | 518 |
| NACA2    | -0.365632863 | 6.82E-18 | 8.34E-17 | 520 | 520 |
| RAB26    | -0.365700623 | 6.72E-18 | 8.22E-17 | 520 | 519 |
| DENND2D  | -0.365728806 | 6.68E-18 | 8.17E-17 | 520 | 520 |
| RNF208   | -0.36594191  | 6.37E-18 | 7.81E-17 | 520 | 520 |
| NDUFC1   | -0.366130988 | 6.11E-18 | 7.50E-17 | 520 | 520 |
| SULT2B1  | -0.3663247   | 5.85E-18 | 7.19E-17 | 520 | 520 |
| SLPI     | -0.366717271 | 5.37E-18 | 6.62E-17 | 520 | 520 |
| N4BP3    | -0.367082525 | 4.95E-18 | 6.11E-17 | 520 | 520 |
| C3orf37  | -0.367091742 | 4.94E-18 | 6.10E-17 | 520 | 520 |
| ZNF57    | -0.367422271 | 4.59E-18 | 5.68E-17 | 520 | 520 |
| EBP      | -0.367480508 | 4.53E-18 | 5.62E-17 | 520 | 520 |
| FAM103A1 | -0.367520136 | 4.49E-18 | 5.58E-17 | 520 | 520 |
| SNRPF    | -0.367628533 | 4.38E-18 | 5.45E-17 | 520 | 520 |
| RBM47    | -0.367641969 | 4.37E-18 | 5.44E-17 | 520 | 520 |

|           |              |          |          |     |     |
|-----------|--------------|----------|----------|-----|-----|
| TARDBP    | -0.368442641 | 3.65E-18 | 4.57E-17 | 520 | 520 |
| SYK       | -0.368727741 | 3.43E-18 | 4.29E-17 | 520 | 520 |
| CC2D1A    | -0.368932352 | 3.27E-18 | 4.11E-17 | 520 | 520 |
| VAMP8     | -0.369002832 | 3.22E-18 | 4.04E-17 | 520 | 520 |
| C6orf136  | -0.369133952 | 3.13E-18 | 3.93E-17 | 520 | 520 |
| FAM136A   | -0.369674305 | 2.77E-18 | 3.50E-17 | 520 | 520 |
| C1orf172  | -0.370057767 | 2.54E-18 | 3.22E-17 | 520 | 520 |
| FGFR3     | -0.370221244 | 2.45E-18 | 3.12E-17 | 520 | 520 |
| DCI       | -0.370913057 | 2.10E-18 | 2.68E-17 | 520 | 520 |
| TBC1D3B   | -0.371026928 | 2.04E-18 | 2.61E-17 | 520 | 520 |
| DHRS1     | -0.37102733  | 2.04E-18 | 2.61E-17 | 520 | 520 |
| TMPRSS11D | -0.371465062 | 1.85E-18 | 2.38E-17 | 520 | 520 |
| SHMT1     | -0.371961083 | 1.66E-18 | 2.13E-17 | 520 | 520 |
| C6orf132  | -0.372303438 | 1.53E-18 | 1.98E-17 | 520 | 520 |
| TTC39A    | -0.372353054 | 1.52E-18 | 1.96E-17 | 520 | 520 |
| C9orf84   | -0.373109968 | 1.28E-18 | 1.65E-17 | 520 | 519 |
| CLDN7     | -0.373699116 | 1.12E-18 | 1.45E-17 | 520 | 520 |
| MGST2     | -0.373817615 | 1.09E-18 | 1.42E-17 | 520 | 520 |
| IMP3      | -0.373923828 | 1.06E-18 | 1.39E-17 | 520 | 520 |
| RRP1      | -0.37394411  | 1.06E-18 | 1.38E-17 | 520 | 520 |
| NR2F6     | -0.374293723 | 9.75E-19 | 1.28E-17 | 520 | 520 |
| AMN       | -0.374738269 | 8.81E-19 | 1.16E-17 | 520 | 518 |
| NDUFV2    | -0.374855033 | 8.58E-19 | 1.13E-17 | 520 | 520 |
| SYTL1     | -0.375655968 | 7.14E-19 | 9.45E-18 | 520 | 520 |
| COX5A     | -0.375727293 | 7.02E-19 | 9.30E-18 | 520 | 520 |
| RHBDL2    | -0.37619584  | 6.31E-19 | 8.39E-18 | 520 | 520 |
| EVPL      | -0.376507535 | 5.87E-19 | 7.85E-18 | 520 | 520 |
| HOOK2     | -0.376557105 | 5.81E-19 | 7.76E-18 | 520 | 520 |
| ARRDC1    | -0.376815287 | 5.47E-19 | 7.33E-18 | 520 | 520 |
| FAM83E    | -0.376854611 | 5.42E-19 | 7.27E-18 | 520 | 518 |
| LCN2      | -0.376998136 | 5.25E-19 | 7.04E-18 | 520 | 520 |
| SPRR3     | -0.377110772 | 5.11E-19 | 6.87E-18 | 520 | 520 |
| BAG1      | -0.377349944 | 4.84E-19 | 6.51E-18 | 520 | 520 |
| LRRC1     | -0.377753913 | 4.41E-19 | 5.94E-18 | 520 | 520 |
| CENPP     | -0.377871471 | 4.29E-19 | 5.79E-18 | 520 | 520 |
| C1orf177  | -0.377923784 | 4.24E-19 | 5.73E-18 | 520 | 509 |
| F12       | -0.377980706 | 4.18E-19 | 5.66E-18 | 520 | 520 |
| GRB7      | -0.378158272 | 4.01E-19 | 5.44E-18 | 520 | 520 |
| HES5      | -0.378228165 | 3.95E-19 | 5.36E-18 | 520 | 510 |
| C20orf151 | -0.37850998  | 3.70E-19 | 5.03E-18 | 520 | 517 |
| SUCLG1    | -0.379108142 | 3.22E-19 | 4.39E-18 | 520 | 520 |
| GGCT      | -0.379527303 | 2.92E-19 | 3.99E-18 | 520 | 520 |
| TJP3      | -0.379529296 | 2.92E-19 | 3.99E-18 | 520 | 517 |
| ESRP2     | -0.379837322 | 2.72E-19 | 3.73E-18 | 520 | 520 |
| S100A14   | -0.380208204 | 2.49E-19 | 3.43E-18 | 520 | 520 |
| ATP5G1    | -0.380609107 | 2.27E-19 | 3.13E-18 | 520 | 520 |

|           |              |          |          |     |     |
|-----------|--------------|----------|----------|-----|-----|
| RHCG      | -0.380815444 | 2.17E-19 | 2.99E-18 | 520 | 520 |
| HIBCH     | -0.380900754 | 2.12E-19 | 2.93E-18 | 520 | 520 |
| TACSTD2   | -0.380904484 | 2.12E-19 | 2.93E-18 | 520 | 520 |
| HINT1     | -0.381145589 | 2.01E-19 | 2.78E-18 | 520 | 520 |
| CD164L2   | -0.381747196 | 1.74E-19 | 2.42E-18 | 520 | 516 |
| FAM98C    | -0.382931976 | 1.32E-19 | 1.86E-18 | 520 | 520 |
| GIPC1     | -0.383361631 | 1.19E-19 | 1.68E-18 | 520 | 520 |
| C15orf62  | -0.38340144  | 1.18E-19 | 1.67E-18 | 520 | 520 |
| FAAH2     | -0.383562204 | 1.14E-19 | 1.61E-18 | 520 | 520 |
| FBXO46    | -0.383748767 | 1.09E-19 | 1.54E-18 | 520 | 520 |
| ATP5H     | -0.383750682 | 1.09E-19 | 1.54E-18 | 520 | 520 |
| FXYD3     | -0.384040289 | 1.02E-19 | 1.45E-18 | 520 | 520 |
| GJA9      | -0.385128794 | 7.86E-20 | 1.13E-18 | 520 | 520 |
| TECR      | -0.386041013 | 6.33E-20 | 9.15E-19 | 520 | 520 |
| MAPK13    | -0.386336914 | 5.90E-20 | 8.55E-19 | 520 | 520 |
| ATG4D     | -0.38709127  | 4.93E-20 | 7.17E-19 | 520 | 520 |
| ZNF296    | -0.388068139 | 3.90E-20 | 5.73E-19 | 520 | 520 |
| SMAGP     | -0.388210218 | 3.77E-20 | 5.55E-19 | 520 | 520 |
| ADI1      | -0.388237423 | 3.75E-20 | 5.52E-19 | 520 | 520 |
| C1orf128  | -0.388537467 | 3.49E-20 | 5.15E-19 | 520 | 520 |
| SAMD10    | -0.389575091 | 2.72E-20 | 4.03E-19 | 520 | 520 |
| C19orf36  | -0.389959896 | 2.48E-20 | 3.69E-19 | 520 | 520 |
| C12orf29  | -0.390970425 | 1.94E-20 | 2.91E-19 | 520 | 520 |
| VPS29     | -0.3914312   | 1.74E-20 | 2.61E-19 | 520 | 520 |
| PVRL4     | -0.391541011 | 1.69E-20 | 2.55E-19 | 520 | 520 |
| TGM1      | -0.391907196 | 1.55E-20 | 2.34E-19 | 520 | 520 |
| RAB11A    | -0.392884153 | 1.22E-20 | 1.85E-19 | 520 | 520 |
| TSEN54    | -0.393115262 | 1.16E-20 | 1.75E-19 | 520 | 520 |
| ATP5C1    | -0.394072603 | 9.15E-21 | 1.40E-19 | 520 | 520 |
| MYCBP     | -0.394086484 | 9.12E-21 | 1.39E-19 | 520 | 520 |
| TTC9      | -0.395384882 | 6.64E-21 | 1.02E-19 | 520 | 520 |
| ATP5O     | -0.396616594 | 4.90E-21 | 7.56E-20 | 520 | 520 |
| TMEM125   | -0.396795667 | 4.69E-21 | 7.24E-20 | 520 | 520 |
| NSDHL     | -0.39696346  | 4.50E-21 | 6.96E-20 | 520 | 520 |
| TUBB2C    | -0.397101493 | 4.35E-21 | 6.73E-20 | 520 | 520 |
| UQCRHL    | -0.398163479 | 3.35E-21 | 5.21E-20 | 520 | 520 |
| DNAJC7    | -0.399227151 | 2.57E-21 | 4.05E-20 | 520 | 520 |
| ERBB3     | -0.399899723 | 2.17E-21 | 3.43E-20 | 520 | 520 |
| S100A9    | -0.400201393 | 2.02E-21 | 3.20E-20 | 520 | 520 |
| ECHDC2    | -0.400486374 | 1.88E-21 | 2.98E-20 | 520 | 520 |
| TPRN      | -0.401099022 | 1.61E-21 | 2.57E-20 | 520 | 520 |
| LOC146880 | -0.401440084 | 1.48E-21 | 2.36E-20 | 520 | 520 |
| UQCRH     | -0.402584989 | 1.11E-21 | 1.79E-20 | 520 | 520 |
| MAL2      | -0.403091711 | 9.78E-22 | 1.58E-20 | 520 | 520 |
| FAM73B    | -0.403111424 | 9.73E-22 | 1.58E-20 | 520 | 520 |
| CXCL17    | -0.403208774 | 9.50E-22 | 1.54E-20 | 520 | 516 |

|               |              |          |          |     |     |
|---------------|--------------|----------|----------|-----|-----|
| UBAC1         | -0.403485888 | 8.86E-22 | 1.44E-20 | 520 | 520 |
| SDCBP2        | -0.404126734 | 7.53E-22 | 1.23E-20 | 520 | 520 |
| C9orf169      | -0.405222364 | 5.71E-22 | 9.41E-21 | 520 | 520 |
| COX6A1        | -0.405824047 | 4.90E-22 | 8.11E-21 | 520 | 520 |
| JMJD7-PLA2G4B | -0.40684518  | 3.78E-22 | 6.30E-21 | 520 | 520 |
| S100A8        | -0.406871015 | 3.75E-22 | 6.27E-21 | 520 | 520 |
| ALG6          | -0.408021826 | 2.80E-22 | 4.70E-21 | 520 | 520 |
| MMAB          | -0.408056977 | 2.77E-22 | 4.66E-21 | 520 | 520 |
| SETD8         | -0.408315792 | 2.59E-22 | 4.37E-21 | 520 | 520 |
| FUT2          | -0.408579182 | 2.43E-22 | 4.10E-21 | 520 | 520 |
| KRT78         | -0.408796513 | 2.29E-22 | 3.89E-21 | 520 | 520 |
| LTB4R         | -0.409307885 | 2.01E-22 | 3.42E-21 | 520 | 520 |
| FAM3D         | -0.40982324  | 1.76E-22 | 3.01E-21 | 520 | 516 |
| ULK3          | -0.410117044 | 1.63E-22 | 2.80E-21 | 520 | 520 |
| NOXA1         | -0.412363704 | 9.13E-23 | 1.58E-21 | 520 | 520 |
| FUT3          | -0.412958014 | 7.82E-23 | 1.36E-21 | 520 | 518 |
| FAM162A       | -0.413646186 | 6.54E-23 | 1.14E-21 | 520 | 520 |
| PCBD2         | -0.414693615 | 4.97E-23 | 8.77E-22 | 520 | 520 |
| CKMT1A        | -0.41518692  | 4.37E-23 | 7.73E-22 | 520 | 518 |
| NUDT8         | -0.416394633 | 3.18E-23 | 5.67E-22 | 520 | 520 |
| C10orf95      | -0.418097515 | 2.03E-23 | 3.65E-22 | 520 | 518 |
| DBI           | -0.418873029 | 1.65E-23 | 2.98E-22 | 520 | 520 |
| RPP38         | -0.41938963  | 1.44E-23 | 2.61E-22 | 520 | 520 |
| PRSS27        | -0.420108775 | 1.19E-23 | 2.17E-22 | 520 | 520 |
| GPR110        | -0.42080317  | 9.88E-24 | 1.81E-22 | 520 | 515 |
| GGT6          | -0.421616258 | 7.95E-24 | 1.46E-22 | 520 | 519 |
| GDPD3         | -0.421693161 | 7.79E-24 | 1.44E-22 | 520 | 520 |
| KRT24         | -0.422410028 | 6.43E-24 | 1.20E-22 | 520 | 443 |
| RAB1F         | -0.424182149 | 3.99E-24 | 7.56E-23 | 520 | 520 |
| ANAPC7        | -0.424624476 | 3.54E-24 | 6.73E-23 | 520 | 520 |
| NDOR1         | -0.424962217 | 3.23E-24 | 6.16E-23 | 520 | 520 |
| PLEKHH3       | -0.424995326 | 3.20E-24 | 6.11E-23 | 520 | 520 |
| LOC643008     | -0.425738738 | 2.61E-24 | 5.04E-23 | 520 | 519 |
| SPACA4        | -0.426328823 | 2.23E-24 | 4.31E-23 | 520 | 486 |
| FUT6          | -0.426868287 | 1.92E-24 | 3.74E-23 | 520 | 516 |
| CSTB          | -0.427685949 | 1.54E-24 | 3.01E-23 | 520 | 520 |
| REEP4         | -0.432209279 | 4.42E-25 | 8.84E-24 | 520 | 520 |
| SIRT7         | -0.434202457 | 2.54E-25 | 5.19E-24 | 520 | 520 |
| E2F2          | -0.434818734 | 2.14E-25 | 4.38E-24 | 520 | 520 |
| MVK           | -0.434894352 | 2.09E-25 | 4.30E-24 | 520 | 520 |
| ELF3          | -0.435916048 | 1.57E-25 | 3.24E-24 | 520 | 520 |
| RMND5B        | -0.43804366  | 8.62E-26 | 1.80E-24 | 520 | 520 |
| FAM108C1      | -0.438432246 | 7.72E-26 | 1.63E-24 | 520 | 520 |
| FDXR          | -0.440083597 | 4.83E-26 | 1.03E-24 | 520 | 520 |
| COX7B         | -0.441207057 | 3.50E-26 | 7.53E-25 | 520 | 520 |
| STX19         | -0.444932931 | 1.20E-26 | 2.63E-25 | 520 | 515 |

|          |              |          |          |     |     |
|----------|--------------|----------|----------|-----|-----|
| NMU      | -0.446727855 | 7.12E-27 | 1.58E-25 | 520 | 520 |
| RABGGTA  | -0.447658278 | 5.43E-27 | 1.21E-25 | 520 | 520 |
| SLC9A3R1 | -0.448635073 | 4.08E-27 | 9.19E-26 | 520 | 520 |
| RAB25    | -0.449119066 | 3.54E-27 | 8.02E-26 | 520 | 520 |
| GLTP     | -0.449886146 | 2.82E-27 | 6.44E-26 | 520 | 520 |
| CCDC64   | -0.450095411 | 2.66E-27 | 6.08E-26 | 520 | 520 |
| C1orf210 | -0.452664318 | 1.24E-27 | 2.90E-26 | 520 | 519 |
| BDH1     | -0.459853765 | 1.43E-28 | 3.50E-27 | 520 | 520 |
| SH3GLB2  | -0.460562357 | 1.15E-28 | 2.85E-27 | 520 | 520 |
| CCDC64B  | -0.464732066 | 3.20E-29 | 8.22E-28 | 520 | 519 |
| RHOV     | -0.466671538 | 1.76E-29 | 4.56E-28 | 520 | 520 |
| DUOXA2   | -0.467048116 | 1.56E-29 | 4.07E-28 | 520 | 520 |
| CCDC56   | -0.467685009 | 1.28E-29 | 3.37E-28 | 520 | 520 |
| STAP2    | -0.471777494 | 3.54E-30 | 9.72E-29 | 520 | 520 |
| RAPGEFL1 | -0.472406184 | 2.90E-30 | 7.98E-29 | 520 | 520 |
| PITX1    | -0.474159312 | 1.66E-30 | 4.62E-29 | 520 | 520 |
| LLGL2    | -0.474966097 | 1.28E-30 | 3.59E-29 | 520 | 520 |
| BSPRY    | -0.47721626  | 6.23E-31 | 1.76E-29 | 520 | 518 |
| HDHD3    | -0.479483329 | 2.99E-31 | 8.62E-30 | 520 | 520 |
| CRB3     | -0.486880288 | 2.63E-32 | 8.00E-31 | 520 | 520 |
| SLC25A10 | -0.487468933 | 2.17E-32 | 6.59E-31 | 520 | 520 |
| ENSA     | -0.49223817  | 4.36E-33 | 1.37E-31 | 520 | 520 |
| TRIM7    | -0.496151292 | 1.15E-33 | 3.69E-32 | 520 | 520 |
| CSTA     | -0.501078218 | 2.09E-34 | 6.93E-33 | 520 | 520 |
| WIBG     | -0.502185057 | 1.42E-34 | 4.75E-33 | 520 | 520 |
| ASPG     | -0.514901961 | 1.51E-36 | 5.44E-35 | 520 | 516 |

---
